# Supplementary material for: ER stress induced immunopathology involving complement in CADASIL: implications for therapeutics
Source: Acta Neuropathol Commun. 2023 May 8;11:76. doi: 10.1186/s40478-023-01558-1 (PMC10169505; doi:10.1186/s40478-023-01558-1)
Supplement: Supplementary file 2 — Supplementary Material 2 [file 40478_2023_1558_MOESM2_ESM.xlsx]

## Sheet: Control_1_FA
ER Stress Induced Immunopathology involving Complement in CADASIL: Implications for Therapeutics
Mahmod Panahi, Yoshiki Hase, Xavier Gallart-Palau, Sumonto Mitra, Atsushi Watanabe, Roger C Low, Yumi Yamamoto, Diego Sepulveda-Falla, Atticus H Hainsworth, Masafumi Ihara, Siu Kwan Sze, Matti Viitanen, Homira Behbahani, Raj N Kalaria
Supplementary information
Supplementary dataset 1: List of total proteins identified by LC-MS/MS in FA fractions of control subjects. Each tab referes to the total proteins identified in each individual.
Description	P-value	Score	MW	Accession	Peptide (Hits)
2',3'-cyclic-nucleotide 3'-phosphodiesterase (EC 3.1.4.37)	1.84291e-10	240.242	45070.4	180687	45 (38 3 1 2 1)
syntaxin binding protein 1 isoform a [Homo sapiens]	1.90451e-11	236.2	68692.3	4507297	36 (32 1 0 2 1)
glial fibrillary acidic protein [Homo sapiens]	3.86659e-08	236.172	49849.7	4503979	32 (26 2 3 1 0)
microtubule-associated protein 2 [Homo sapiens]	2.36445e-10	226.226	199045	1850617	26 (22 2 1 1 0)
I38369 beta-tubulin - human (fragment)	3.79858e-11	222.261	48848.5	2119276	103 (82 9 2 3 7)
novel protein similar to human titin (TTN) [Danio rerio]	0.00121956	202.098	2437322	94732358	37 (4 9 12 6 6)
brain creatine kinase [Homo sapiens]	4.30615e-11	184.266	42617.4	21536286	57 (50 3 0 2 2)
neurofilament, light polypeptide 68kDa [Homo sapiens]	6.64939e-09	158.237	61479.3	105990539	24 (19 2 1 2 0)
tubulin alpha 6 [Homo sapiens]	8.0757e-10	158.199	49863.5	14389309	63 (56 4 1 2 0)
neurofilament, medium polypeptide 150kDa [Homo sapiens]	3.09249e-11	146.293	102386	4885513	19 (16 1 1 0 1)
microtubule-associated protein 1B isoform 1 [Homo sapiens]	5.66764e-10	144.202	270452	5174525	19 (14 4 0 0 1)
tubulin, beta 4 [Homo sapiens]	4.06671e-11	136.271	49553.9	21361322	79 (60 12 4 1 2)
ANK2_HUMAN Ankyrin-2 (Brain ankyrin) (Ankyrin-B) (Ankyrin, nonerythroid)	4.71102e-09	134.243	430079	1703310	17 (10 2 1 2 2)
ATP synthase, H+ transporting, mitochondrial F1 complex, alpha subunit	1.79257e-11	126.264	59713.7	4757810	25 (22 1 0 1 1)
KIAA0987 protein [Homo sapiens]	4.57976e-10	122.255	123629	4589618	16 (15 0 0 0 1)
ferritin, heavy polypeptide 1 [Homo sapiens]	9.18476e-11	118.347	21212.3	56682959	45 (38 5 1 0 1)
A40671 dynamin, internal form 1, long C-terminal form - human [M	1.10826e-14	110.313	97201	539580	33 (33 0 0 0 0)
unknown [Homo sapiens]	2.74959e-12	110.202	268547	62988842	15 (6 4 1 2 2)
A Chain A, Crystal Structure Of A DictyosteliumTETRAHYMENA CHIMERA Actin	1.94323e-09	108.192	41719.9	7245526	29 (26 1 1 0 1)
Na+/K+ -ATPase alpha 2 subunit proprotein [Homo sapiens]	2.42429e-08	100.263	112194	4502271	13 (9 3 1 0 0)
SPTAN1 protein [Homo sapiens]	1.53143e-06	100.17	282106	31565122	11 (8 2 0 1 0)
KIAA0968 protein [Homo sapiens]	8.00202e-07	100.164	58985.2	4589580	18 (12 4 1 1 0)
tubulin, beta, 4 [Homo sapiens]	3.88848e-10	96.2373	50400.3	50592996	33 (17 11 3 1 1)
ubiquitin carboxyl-terminal esterase L1 (ubiquitin thiolesterase) [Hom	1.48402e-07	96.191	24808.5	21361091	20 (17 1 1 0 1)
heat shock 90kDa protein 1, beta [Homo sapiens]	1.69217e-11	92.263	83212.2	20149594	15 (10 3 0 0 2)
dihydropyrimidinase-like 2 [Homo sapiens]	7.0187e-11	90.2148	62254.7	4503377	11 (9 1 0 0 1)
Na+/K+ -ATPase alpha 1 subunit isoform a proprotein [Homo sapiens]	3.98338e-07	88.2387	112824	21361181	11 (7 1 0 2 1)
H4 histone family, member A [Homo sapiens]	5.82661e-05	86.1658	11360.4	4504301	19 (16 0 1 1 1)
ATRB actin, skeletal muscle - rabbit	0.000383474	84.1763	41789.8	71611	20 (9 6 3 1 1)
KIAA0338 [Homo sapiens]	7.86069e-09	82.1953	103516	2224617	10 (7 0 1 1 1)
solute carrier family 25 (mitochondrial carrier; adenine nucleotide tr	5.54649e-09	80.1497	33043.2	55749577	12 (12 0 0 0 0)
G02520 plectin - human	2.36131e-05	78.1157	518172	7442004	11 (2 4 3 2 0)
tyrosine 3-monooxygenase/tryptophan 5-monooxygenase activation protein,	1.01739e-06	78.099	28064.8	4507949	19 (12 4 1 0 2)
tyrosine 3-monooxygenase/tryptophan 5-monooxygenase activation protein,	4.73335e-05	72.1569	28284.9	9507245	10 (6 2 2 0 0)
Na+/K+ -ATPase beta 1 subunit isoform a [Homo sapiens]	2.82274e-05	70.1821	35038.9	4502277	8 (8 0 0 0 0)
myelin basic protein isoform 1 [Homo sapiens]	1.62405e-07	70.1781	21480	68509930	18 (16 1 0 0 1)
ferritin, light polypeptide [Homo sapiens]	4.64135e-09	70.1779	20007.1	20149498	14 (11 1 1 0 1)
NEBU_HUMAN Nebulin	0.00258676	70.0738	772743	19856971	13 (1 2 5 2 3)
brain abundant, membrane attached signal protein 1 [Homo sapiens]	5.63919e-08	68.1577	22680	30795231	10 (6 2 1 1 0)
VDAC2 [Homo sapiens]	0.00131845	68.1264	30393	48146045	10 (8 0 1 0 1)
tubulin, beta 2 [Homo sapiens]	4.86278e-13	66.258	49875	4507729	20 (17 1 2 0 0)
tubulin, alpha-like 3 [Homo sapiens]	4.7443e-07	66.1519	49876.8	13376181	21 (17 2 0 1 1)
N-ethylmaleimide sensitive fusion protein attachment protein beta [Mus	2.9168e-08	64.2282	33535.5	29789104	7 (6 0 0 1 0)
N-ethylmaleimide-sensitive factor [Homo sapiens]	1.16334e-07	64.2019	82602.2	11079228	8 (6 1 1 0 0)
proteolipid protein [Rattus norvegicus]	2.72484e-05	64.156	30057.1	13591880	13 (12 0 0 1 0)
KIAA0417 [Homo sapiens]	1.08098e-07	64.1489	78381.4	2887409	8 (5 1 0 1 1)
unnamed protein product [Homo sapiens]	5.13615e-06	64.124	57919.5	28940	8 (4 1 2 1 0)
S68466 translation elongation factor EF-Tu-like protein P43 precursor, mitochondria	0.000480286	64.1174	49502.2	7443384	8 (5 1 0 1 1)
unnamed protein product [Homo sapiens]	2.54715e-07	62.1955	49811	10433717	19 (9 6 4 0 0)
voltage-dependent anion channel 1 [Homo sapiens]	3.74241e-06	60.202	30753.6	4507879	8 (8 0 0 0 0)
GNAO2_HUMAN Guanine nucleotide-binding protein G(o) subunit alpha 2	1.0797e-06	60.1714	40061.1	60416433	7 (5 0 1 1 0)
ubiquitin-activating enzyme E1 [Homo sapiens]	5.36285e-07	60.1548	117774	23510338	8 (6 1 0 0 1)
H3 histone, family 3A [Homo sapiens]	6.00618e-05	60.1178	15318.5	4504279	15 (11 3 0 0 1)
H1 histone family, member 0 [Homo sapiens]	2.91746e-07	58.2096	20850.2	4885371	9 (7 2 0 0 0)
unnamed protein product [Homo sapiens]	1.69161e-08	58.1905	35738.8	32486	7 (5 2 0 0 0)
isocitrate dehydrogenase (NADP+) [Homo sapiens]	4.52374e-07	58.1689	50915.9	872121	6 (5 1 0 0 0)
glyceraldehyde-3-phosphate dehydrogenase [Homo sapiens]	4.59831e-11	56.246	36030.4	7669492	17 (15 1 1 0 0)
clathrin heavy chain 1 [Homo sapiens]	2.3922e-06	54.2076	191492	4758012	8 (5 0 2 0 1)
tyrosine 3/tryptophan 5 -monooxygenase activation protein, zeta polypep	1.80141e-06	54.1889	27727.7	4507953	11 (10 0 0 1 0)
triosephosphate isomerase 1 [Homo sapiens]	2.32775e-07	54.1522	26652.7	4507645	6 (4 1 1 0 0)
eukaryotic translation elongation factor 1 alpha 1 [Homo sapiens]	0.000452164	54.1084	50109.2	4503471	6 (4 1 1 0 0)
KIAA0820 protein [Homo sapiens]	8.20773e-07	52.2511	99887.1	20521666	27 (4 21 1 1 0)
Bloom syndrome protein [Homo sapiens]	0.00695955	52.1001	158900	4557365	7 (2 4 1 0 0)
tubulin, alpha 1B [Mus musculus]	2.1411e-10	50.2141	50119.6	34740335	24 (24 0 0 0 0)
tyrosine 3/tryptophan 5 -monooxygenase activation protein, epsilon poly	1.19087e-08	50.212	29155.4	5803225	8 (7 1 0 0 0)
histone H2B [Homo sapiens]	1.3978e-08	50.2086	13927.6	1568557	11 (11 0 0 0 0)
cofilin 1 (non-muscle) [Homo sapiens]	7.97346e-07	50.1727	18490.7	5031635	6 (6 0 0 0 0)
ubiquinol-cytochrome c reductase core protein II [Homo sapiens]	4.34391e-06	50.1282	48412.9	50592988	6 (6 0 0 0 0)
bromodomain PHD finger transcription factor [Homo sapiens]	0.00121932	48.1401	311017	6683492	7 (2 2 2 1 0)
JN0908 H+-exporting ATPase (EC 3.6.3.6) chain D, vacuolar - human	6.56228e-05	48.1217	31683.9	542837	5 (4 1 0 0 0)
calcium/calmodulin-dependent protein kinase IIB isoform 8 [Homo sapien	2.13463e-08	46.1731	50923	26051218	6 (5 0 1 0 0)
CE152_HUMAN Centrosomal protein of 152 kDa (Cep152 protein)	0.00234089	44.1537	147252	62286590	14 (1 3 5 2 3)
unnamed protein product [Homo sapiens]	1.91628e-07	42.2203	31292.4	7020000	6 (4 1 0 1 0)
histone cluster 1, H1d [Homo sapiens]	3.59746e-07	42.1973	22336.3	4885377	7 (5 1 0 1 0)
K1C9_HUMAN Keratin, type I cytoskeletal 9 (Cytokeratin-9) (CK-9) (Keratin-9)	4.90975e-08	42.1952	62091.8	81175178	7 (4 1 0 0 2)
N Chain N, Mutant Monomer Of Recombinant Human Hexokinase Type I Complexed With	2.40772e-05	42.1553	102383	7245424	5 (4 0 0 0 1)
BAI2_HUMAN Brain-specific angiogenesis inhibitor 2 precursor	0.000723633	42.0929	171031	10719903	6 (2 1 2 0 1)
heat shock protein 90kDa alpha (cytosolic), class A member 1 isoform 2	9.01068e-11	40.2579	84620.7	40254816	5 (4 0 0 1 0)
OGHU6C cytochrome-c oxidase (EC 1.9.3.1) chain VIc - human [MAS	6.49585e-09	40.1908	8715.65	2144367	7 (6 0 1 0 0)
synaptosomal-associated protein 25 isoform SNAP25A [Homo sapiens]	3.30995e-08	40.1724	23321.2	18765733	6 (5 0 0 1 0)
ubiquinol-cytochrome c reductase core protein I [Homo sapiens]	9.78499e-06	40.1717	52612.5	46593007	4 (4 0 0 0 0)
growth associated protein 43 [Homo sapiens]	0.00136723	40.1637	24787.9	4503911	4 (4 0 0 0 0)
contactin 1 isoform 1 precursor [Homo sapiens]	1.70135e-07	40.1602	113249	28373117	4 (4 0 0 0 0)
VPP1_HUMAN Vacuolar proton translocating ATPase 116 kDa subunit a isoform 1 (	2.92235e-08	40.1416	96350.3	59803038	4 (4 0 0 0 0)
cytochrome c oxidase subunit Vb precursor [Homo sapiens]	0.00226256	40.12	13686.9	17017988	6 (5 0 1 0 0)
protein kinase C, alpha [Homo sapiens]	3.11337e-09	38.1768	76714.2	4506067	7 (5 1 1 0 0)
voltage-dependent anion channel 3 [Homo sapiens]	2.53321e-06	38.1558	30639.3	25188179	4 (3 1 0 0 0)
Nogo-A protein [Homo sapiens]	3.16143e-09	38.1548	129861	9408096	4 (3 1 0 0 0)
heterogeneous nuclear ribonucleoprotein A2/B1 isoform A2 [Homo sapiens]	0.000686868	38.1525	35983.8	4504447	6 (4 0 1 0 1)
synapsin I isoform Ia [Homo sapiens]	0.000707487	38.1172	74065.8	19924099	6 (5 1 0 0 0)
RPGF2_HUMAN Rap guanine nucleotide exchange factor 2 (Neural RAP guanine nucl	0.00488908	38.084	167312	34395737	7 (0 3 1 1 2)
ATS2_HUMAN ADAMTS-2 precursor (A disintegrin and metalloproteinase with throm	0.00976104	38.059	134636	11131170	4 (3 1 0 0 0)
AT2B4_HUMAN Plasma membrane calcium-transporting ATPase 4 (PMCA4) (Plasma mem	2.30344e-08	36.2164	137833	14286105	4 (2 2 0 0 0)
crystallin, alpha B [Homo sapiens]	1.02614e-08	36.1962	20146.4	4503057	5 (4 0 1 0 0)
tenascin-R [Homo sapiens]	1.83973e-05	36.1731	149479	1617316	5 (2 3 0 0 0)
KIAA1454 protein [Homo sapiens]	0.0022953	36.0826	142613	7959167	5 (1 2 1 1 0)
golgi-associated microtubule-binding protein HOOK3 [Homo sapiens]	0.00166961	36.0727	83074.4	14165274	6 (1 1 2 1 1)
helicase, lymphoid-specific [Homo sapiens]	0.00258788	34.1297	97012.3	21914927	6 (3 1 1 1 0)
solute carrier family 25 member 3 isoform a precursor [Homo sapiens]	0.00319538	34.1198	40068.8	6031192	5 (3 0 0 1 1)
MAP1A_HUMAN Microtubule-associated protein 1A (MAP 1A) (Proliferation-related	0.000535437	34.1074	306342	51338794	6 (2 0 3 0 1)
SPTA1_HUMAN Spectrin alpha chain, erythrocyte (Erythroid alpha-spectrin)	0.00777544	34.1029	279742	1174412	5 (2 1 0 1 1)
unnamed protein product [Homo sapiens]	0.00750758	34.0654	86940.1	10438291	5 (1 2 1 0 1)
glutamate transporter [Homo sapiens]	0.000192833	32.164	61664.6	488752	7 (3 1 3 0 0)
solute carrier family 17, member 7 [Homo sapiens]	0.00100863	32.1465	61573.3	9945322	4 (3 0 0 0 1)
minichromosome maintenance complex component 7 isoform 1 [Homo sapiens	0.00121368	32.0932	81256.7	33469968	6 (1 1 2 1 1)
retinitis pigmentosa RP1 protein [Homo sapiens]	0.00154764	32.0896	240510	5454016	4 (3 0 0 0 1)
TLN1_HUMAN Talin-1	0.00502242	32.0797	269596	81175200	6 (0 1 3 1 1)
tubulin polymerization promoting protein [Homo sapiens]	7.97307e-11	30.2205	23679.2	5902018	4 (4 0 0 0 0)
glucose phosphate isomerase [Homo sapiens]	2.06445e-08	30.1978	63107.3	18201905	3 (3 0 0 0 0)
solute carrier family 25, member 5 [Homo sapiens]	8.51694e-06	30.1762	32874.2	4502099	3 (3 0 0 0 0)
cysteine and glycine-rich protein 1 [Homo sapiens]	1.89095e-07	30.1742	20553.8	4758086	4 (4 0 0 0 0)
collapsin response mediator protein 1 isoform 2 [Homo sapiens]	2.92337e-08	30.1722	62144.8	4503051	4 (4 0 0 0 0)
SYN2_HUMAN Synapsin-2 (Synapsin II)	2.68382e-07	30.1713	62928.8	6686022	4 (2 1 0 0 1)
KIAA1176 protein [Homo sapiens]	3.99331e-06	30.1587	121738	6330233	3 (3 0 0 0 0)
guanine nucleotide-binding protein, beta-1 subunit [Mus musculus]	1.60566e-08	30.155	37353	6680045	4 (4 0 0 0 0)
KRHU2 keratin 1, type II, cytoskeletal - human	8.61318e-07	30.152	65454.4	7428712	3 (3 0 0 0 0)
adaptor-related protein complex 2, alpha 2 subunit [Homo sapiens]	2.305e-06	30.1513	103895	27477041	4 (2 0 1 1 0)
isocitrate dehydrogenase 3 (NAD+) gamma isoform a precursor [Homo sapie	0.00081311	30.143	42767.1	4758582	3 (3 0 0 0 0)
unnamed protein product [Homo sapiens]	0.00826612	30.1196	50621.8	10435466	5 (3 1 0 0 1)
75 kDa subunit NADH dehydrogenase precursor [Homo sapiens]	0.000849987	30.1086	79522.6	38079	4 (2 1 0 0 1)
S38532 protein 14-3-3 eta chain - human	3.368e-07	30.0985	28172	481365	6 (2 1 1 2 0)
heterogeneous nuclear ribonucleoprotein K [Mus musculus]	0.00249709	30.0935	50944.4	13384620	4 (2 1 0 0 1)
acetyl-CoA carboxylase [Homo sapiens]	0.00077636	30.0582	279514	2138330	5 (1 2 0 0 2)
B46091 H+-exporting ATPase (EC 3.6.3.6) chain A, vacuolar (VA68 type) - human	7.54695e-07	28.2101	68204.5	1082432	4 (2 0 1 0 1)
histone cluster 1, H1a [Homo sapiens]	4.90841e-08	28.1797	21828.9	4885373	7 (4 1 2 0 0)
DCLK1_HUMAN Serine/threonine-protein kinase DCLK1 (Doublecortin-like and CAM k	1.46942e-08	28.1781	82173	6225242	8 (6 0 1 0 1)
TBB4Q_HUMAN Tubulin beta-4q chain	1.76407e-06	28.1501	48403.5	12643363	6 (3 1 1 0 1)
calcium/calmodulin-dependent protein kinase II gamma isoform 1 [Mus mu	6.47811e-10	28.1408	59569.4	75991700	4 (2 1 0 1 0)
KIAA1878 protein [Homo sapiens]	6.82323e-06	28.1238	48892	14017973	4 (2 0 1 0 1)
prohibitin 2 [Homo sapiens]	1.47667e-07	28.1215	33275.9	6005854	3 (2 1 0 0 0)
unnamed protein product [Homo sapiens]	0.00667284	28.119	102321	14042328	6 (0 2 2 2 0)
heat shock 27kDa protein 1 [Homo sapiens]	1.10908e-05	28.1178	22768.5	4504517	3 (2 1 0 0 0)
phosphoglycerate mutase 1 (brain) [Homo sapiens]	0.000286681	28.1138	28785.8	4505753	3 (2 1 0 0 0)
H1 histone family, member X [Homo sapiens]	0.00359477	28.108	22473.5	5174449	3 (2 1 0 0 0)
hypothetical protein [Homo sapiens]	0.005125	28.1043	96685.5	21740179	4 (1 1 1 1 0)
envelope glycoprotein [Human immunodeficiency virus 1]	0.00755582	28.104	31845	99029604	8 (3 3 1 0 1)
H2A histone family, member X [Homo sapiens]	0.0069546	28.0872	15135.4	4504253	3 (2 1 0 0 0)
COX41_PANTR Cytochrome c oxidase subunit 4 isoform 1 (Cytochrome c oxidase sub	0.00297529	28.0827	16851.6	5921895	5 (1 0 2 1 1)
TEX15_HUMAN Testis-expressed sequence 15 protein	0.00408407	28.0821	315164	74717632	7 (0 2 2 1 2)
IFI-4 [Homo sapiens]	0.00738067	28.0699	103604	2326524	5 (1 1 1 0 2)
heat shock 70kDa protein 5 [Homo sapiens]	0.000255711	26.1312	72288.5	16507237	3 (2 0 1 0 0)
S-phase kinase-associated protein 1A isoform b [Homo sapiens]	0.000612649	26.1285	18646.2	25777713	5 (2 1 1 1 0)
DDX20_HUMAN Probable ATP-dependent RNA helicase DDX20 (DEAD box protein 20) (	0.00846639	26.088	92182.4	12643886	3 (1 2 0 0 0)
HAP1_HUMAN Huntingtin-associated protein 1 (HAP-1) (Neuroan 1)	0.00863064	26.0656	75467.1	23831158	3 (2 0 1 0 0)
adaptor protein complex AP-2, mu1 [Mus musculus]	3.56604e-12	24.1975	49623.1	6753074	3 (2 0 0 1 0)
heterogeneous nuclear ribonucleoprotein H2 [Homo sapiens]	2.14111e-05	24.1711	49232.3	9624998	6 (1 0 1 1 3)
DREB_HUMAN Drebrin (Developmentally-regulated brain protein)	8.28779e-05	24.1655	71381.6	2498313	4 (2 0 1 1 0)
cysteine-rich protein 2 [Homo sapiens]	1.972e-05	24.1479	22478	4503049	3 (2 0 0 1 0)
alpha SNAP [Homo sapiens]	0.00439429	24.1462	33225.3	3929617	5 (2 1 0 1 1)
unnamed protein product [Homo sapiens]	4.4776e-08	24.1455	20025.1	37610	3 (1 1 1 0 0)
vanilloid receptor 1 [Homo sapiens]	0.000440913	24.0995	94907.5	15028819	3 (2 0 0 1 0)
HERC5_HUMAN Probable E3 ubiquitin-protein ligase HERC5 (HECT domain and RCC1-	0.00690157	24.0984	116773	47116944	6 (0 1 3 1 1)
similar to Homo sapiens (Human). DNA mismatch repair protein Msh2 [Dicty	0.000460632	24.0982	102498	28850334	3 (2 0 0 1 0)
envelope protein [Human immunodeficiency virus 1] [	0.00285853	24.0899	95064.9	11124719	3 (2 0 0 1 0)
timeless homolog [Homo sapiens]	0.00710538	24.0758	138544	4507507	3 (1 1 1 0 0)
SPTB1_HUMAN Spectrin beta chain, erythrocyte (Beta-I spectrin)	0.00725385	24.0726	246168	134798	4 (1 0 1 2 0)
novel protein similar to human guanylate binding protein 1, interferon-	0.00878857	24.0715	70719.2	94732983	3 (2 0 0 1 0)
RNA dependent RNA polymerase [Human norovirus Saitama]	0.00917212	24.0705	22301.2	46093210	4 (1 0 1 2 0)
MPDZ_HUMAN Multiple PDZ domain protein (Multi-PDZ domain protein 1)	0.00160091	24.07	218459	68052394	4 (1 1 0 1 1)
hypothetical protein LOC151050 [Homo sapiens] [MA	0.00988779	24.0662	112183	40217794	3 (0 3 0 0 0)
Na+,K+ ATPase [Homo sapiens]	4.55271e-08	22.2076	111901	1359715	3 (2 0 0 0 1)
tubulin, beta, 2 [Homo sapiens]	1.03973e-08	22.195	49799	5174735	15 (4 3 8 0 0)
hnRNP U protein [Homo sapiens]	2.04152e-05	22.187	88890.2	32358	3 (1 1 0 1 0)
sarco/endoplasmic reticulum Ca2+ -ATPase [Homo sapiens]	1.25492e-08	22.1645	112442	3021396	3 (2 0 0 0 1)
calcium/calmodulin-dependent protein kinase II delta isoform 1 [Homo s	4.62985e-06	22.154	54093.6	26667183	4 (1 2 0 1 0)
R Chain R, Twinning In Crystals Of Human Skeletal Muscle D- Glyceraldehyde-3-Pho	2.78692e-06	22.141	35853.3	230867	3 (1 1 0 1 0)
transcription factor AP-4 (activating enhancer binding protein 4) [Homo	0.00691351	22.1194	38701.8	4507447	4 (1 1 1 1 0)
synaptotagmin I [Homo sapiens]	0.00686491	22.1132	47542.8	5032139	4 (1 1 0 0 2)
hypothetical protein [Homo sapiens]	0.000311043	22.107	110722	52545742	3 (2 0 0 0 1)
PYM protein [Homo sapiens]	0.00743774	22.1021	22628	23477161	3 (0 2 1 0 0)
hypothetical protein [Homo sapiens]	0.00281209	22.0999	155140	51476984	4 (0 2 0 1 1)
LEU2_HUMAN Leukemia-associated protein 2 (Deleted in lymphocytic leukemia 2)	0.00421568	22.0956	10189.2	8928175	3 (0 2 1 0 0)
SCRN1_HUMAN Secernin-1	0.000119409	22.0818	46352.6	30923294	3 (2 0 0 0 1)
guanine nucleotide exchange factor Lbc [Homo sapiens]	0.00921533	22.0676	307185	15207794	3 (1 0 2 0 0)
peptidylprolyl isomerase A [Mus musculus]	9.011e-09	20.221	17959.8	6679439	3 (3 0 0 0 0)
carbonyl reductase 1 [Homo sapiens]	1.62882e-07	20.2208	30355.9	4502599	2 (2 0 0 0 0)
heat shock 70kDa protein 9B precursor [Homo sapiens]	2.92974e-06	20.2105	73634.8	24234688	3 (1 1 0 0 1)
guanine nucleotide-binding protein, beta-2 subunit [Mus musculus]	2.4795e-08	20.1592	37307.1	13937391	2 (2 0 0 0 0)
A Chain A, Crystal Structure Of Constant Regulatory Domain Of Human Pp2a, Pr65a	1.59776e-09	20.1531	65136.1	4558258	2 (2 0 0 0 0)
ubiquinol-cytochrome c reductase binding protein [Homo sapiens]	2.58478e-08	20.1515	13522	5454152	3 (1 1 0 0 1)
calreticulin precursor [Homo sapiens]	0.00014805	20.1416	48111.9	4757900	2 (2 0 0 0 0)
ankyrin B (440 kDa) [Homo sapiens]	4.92866e-06	20.138	429876	4803663	2 (2 0 0 0 0)
AF304164_1 keratin 1 [Homo sapiens]	7.34015e-06	20.1324	66026.9	11935049	3 (1 0 1 1 0)
phosphoglycerate mutase 2 (muscle) [Homo sapiens] [M	1.6368e-06	20.1289	28201.4	51094513	4 (4 0 0 0 0)
KIAA0627 protein [Homo sapiens]	0.000942781	20.1272	144248	3327068	2 (2 0 0 0 0)
envelope glycoprotein [Human immunodeficiency virus 1]	2.55109e-06	20.1265	96686.5	117643968	2 (2 0 0 0 0)
dihydrolipoamide dehydrogenase precursor [Homo sapiens]	0.000151832	20.1029	54143.1	91199540	2 (2 0 0 0 0)
GPR83_HUMAN Probable G-protein coupled receptor 83 precursor (G-protein coupl	0.00909513	20.1013	48239.3	13878517	2 (2 0 0 0 0)
capping enzyme 1B [Homo sapiens]	0.008073	20.0979	52499.6	3097312	2 (2 0 0 0 0)
unnamed protein product [Homo sapiens]	0.0099725	20.0953	160054	34535967	2 (2 0 0 0 0)
envelope glycoprotein [Human immunodeficiency virus 1]	8.03781e-05	20.0896	97531.9	113196552	3 (0 1 2 0 0)
nucleolar protein NOP5/NOP58 [Homo sapiens]	0.000282858	20.0891	59540.6	7706254	3 (1 1 0 0 1)
contactin associated protein 1 [Homo sapiens]	0.00155083	20.0882	156167	4505463	2 (2 0 0 0 0)
ZNF658 protein [Homo sapiens]	0.00435153	20.0867	71087.4	45708593	4 (2 0 1 0 1)
T02435 probable oxysterol-binding protein DJ430N08.1 - human (fragment)	0.00261808	20.0856	64285	7513266	2 (2 0 0 0 0)
calcium channel, alpha 2/delta subunit 2 [Homo sapiens]	0.00369014	20.0853	129794	7414318	3 (1 0 1 1 0)
gag protein [Human immunodeficiency virus 1]	0.00435974	20.0783	4917.47	57867926	2 (2 0 0 0 0)
contactin 4 isoform a precursor [Homo sapiens]	0.00573364	20.0779	113383	28373122	2 (2 0 0 0 0)
solute carrier family 25, member 13 (citrin) [Homo sapiens]	0.00886259	20.0758	74128.8	7657581	2 (2 0 0 0 0)
unnamed protein product [Homo sapiens]	0.00729066	20.0751	114961	21749523	2 (2 0 0 0 0)
unnamed protein product [Human adenovirus type 7] [MA	0.00618297	20.0639	50674	58523	3 (0 1 2 0 0)
tRNA selenocysteine associated protein 1 [Mus musculus]	0.004323	20.0552	32402.3	62821783	2 (2 0 0 0 0)
H2A histone family, member A [Homo sapiens]	3.61233e-08	18.2054	14127	10645195	4 (3 1 0 0 0)
A Chain A, Crystal Structure Of Caenorhabditis Elegans Mg-Atp Actin Complexed	3.14678e-05	18.1613	41637.7	14278147	2 (1 1 0 0 0)
beta actin [Homo sapiens]	2.80861e-07	18.1583	41709.7	4501885	4 (3 1 0 0 0)
tektin 4 [Homo sapiens]	0.00844799	18.1172	50617.3	21389613	4 (0 2 1 1 0)
KIAA1212 protein [Homo sapiens]	0.0082736	18.1126	90241.8	20521794	4 (1 2 1 0 0)
TCRG1_HUMAN Transcription elongation regulator 1 (TATA box-binding protein-as	0.00619387	18.111	123882	52783427	2 (1 1 0 0 0)
KIAA0763 protein [Homo sapiens]	0.000829171	18.1106	95083	40788355	3 (1 0 1 0 1)
B Chain B, T-To-T(High) Quaternary Transitions In Human Hemoglobin: Deshis146b	4.0042e-05	18.1104	15720.2	61679604	7 (5 2 0 0 0)
centaurin, gamma 1 [Homo sapiens]	0.000325859	18.1083	90481.6	7661962	2 (1 1 0 0 0)
KIAA1415 protein [Homo sapiens]	0.00649879	18.1045	182702	20521906	5 (0 1 1 2 1)
KIF3A_HUMAN Kinesin-like protein KIF3A (Microtubule plus end-directed kinesin	0.00856551	18.1044	80335.1	33112673	6 (2 3 0 0 1)
KIAA1736 protein [Homo sapiens]	0.00880957	18.1022	136142	12698017	3 (1 0 1 0 1)
prosaposin isoform a preproprotein [Homo sapiens]	0.000388352	18.1003	58073.9	11386147	2 (1 1 0 0 0)
AF185810_1 envelope glycoprotein [Human immunodeficiency virus type 2] [M	3.04112e-06	18.0973	18006.8	10716853	2 (1 1 0 0 0)
KIAA0368 [Homo sapiens]	0.00412127	18.0969	159375	2224677	3 (1 1 0 0 1)
hCG2022586, isoform CRA_a [Homo sapiens]	0.00661133	18.0906	45767.8	119599703	4 (0 1 1 1 1)
basonuclin 2 [Homo sapiens]	0.0099746	18.0802	122252	94721327	3 (0 2 0 0 1)
unnamed protein product [Homo sapiens]	0.00670475	18.0678	86974.1	10434785	3 (0 1 1 1 0)
Ig heavy chain [Homo sapiens]	0.00503302	18.0629	3507.6	4096466	2 (1 1 0 0 0)
unknown [Homo sapiens]	2.53552e-06	18.0605	22434.6	2852648	2 (1 1 0 0 0)
helicase-primase primase subunit [Human herpesvirus 3]	0.0025261	18.0501	122469	9625881	3 (1 0 0 2 0)
tyrosine 3/tryptophan 5 -monooxygenase activation protein, theta polype	6.38253e-09	16.1908	27746.8	5803227	5 (3 0 2 0 0)
S-laminin [Homo sapiens]	9.9645e-06	16.1568	66658.8	288401	2 (1 0 1 0 0)
insulin receptor substrate 2 [Homo sapiens]	0.00476863	16.1548	137249	38683860	3 (1 0 0 1 1)
hCG2041433 [Homo sapiens]	0.00768018	16.1492	17874.1	119590516	8 (1 4 1 1 1)
ERBB2 interacting protein isoform 2 [Homo sapiens]	0.00128768	16.1308	153830	8923909	4 (1 0 1 1 1)
NADH dehydrogenase (ubiquinone) Fe-S protein 6, 13kDa (NADH-coenzyme Q	4.71087e-08	16.1144	13702.8	4758792	2 (1 0 1 0 0)
DEAD (Asp-Glu-Ala-Asp) box polypeptide 3, Y-linked [Homo sapiens]	0.000788909	16.1091	73108.2	13514809	3 (2 0 1 0 0)
hCG19408 [Homo sapiens]	0.000657457	16.1088	13754.4	119623204	2 (1 0 1 0 0)
peroxisomal biogenesis factor 14 [Homo sapiens]	0.00276162	16.1008	41211.7	4758896	2 (1 0 1 0 0)
IVa2 [Human adenovirus F]	0.00142822	16.0901	51089.3	9626558	3 (1 0 0 1 1)
PSD3_HUMAN PH and SEC7 domain-containing protein 3 (Pleckstrin homology and S	0.00270668	16.0835	60155.8	42560198	2 (1 0 1 0 0)
tubulin, alpha 8 [Homo sapiens]	0.00411809	16.0817	50061.6	9507215	3 (1 0 0 1 1)
golgi alpha-mannosidaseII [Homo sapiens]	0.00999126	16.0792	130970	974734	2 (0 2 0 0 0)
phospholipase C, eta 2 [Homo sapiens]	0.00501968	16.0754	154571	78499633	2 (1 0 1 0 0)
envelope glycoprotein [Human immunodeficiency virus type 1]	0.00789231	16.0752	96682	2921197	3 (0 1 1 0 1)
pogo transposable element with KRAB domain [Homo sapiens]	0.00149527	16.0749	69399.4	22027480	2 (1 0 1 0 0)
potassium channel tetramerisation domain containing 5 [Homo sapiens]	0.000247607	16.0716	26076	9506651	2 (1 0 1 0 0)
hypothetical protein [Homo sapiens]	0.00690527	16.0667	90732.3	52545792	2 (0 2 0 0 0)
SMC-like protein [Homo sapiens]	0.00256889	16.0667	44704.8	3005929	2 (1 0 1 0 0)
envelope glycoprotein [Human immunodeficiency virus type 1]	0.00372407	16.0631	96883.3	1079623	2 (0 2 0 0 0)
unnamed protein product [Homo sapiens]	0.0042889	16.0527	67823.2	7022765	2 (0 2 0 0 0)
neuronal PAS domain protein 3 isoform 2 [Homo sapiens]	0.00701247	16.0518	99192.4	41281831	2 (0 2 0 0 0)
envelope glycoprotein [Human immunodeficiency virus type 1]	0.00174823	16.0515	23386.5	15294094	2 (1 0 1 0 0)
aconitase 2 precursor [Homo sapiens]	2.10951e-07	14.1697	85372	4501867	2 (1 0 0 1 0)
vacuolar H+ATPase B2 [Homo sapiens]	1.97832e-07	14.1488	56465	19913428	2 (1 0 0 1 0)
elongin C [Homo sapiens]	1.29536e-07	14.138	12465	5032161	4 (1 1 0 0 2)
K22E_HUMAN Keratin, type II cytoskeletal 2 epidermal (Cytokeratin-2e) (K2e) (CK	0.00526271	14.0971	65825.4	547754	2 (1 0 0 1 0)
ATPase, H+ transporting, lysosomal 50/57kDa, V1 subunit H isoform 2 [H	0.00878927	14.0956	55847.1	47717102	3 (1 0 0 1 1)
zinc finger protein 442 [Homo sapiens]	0.00458688	14.0955	72815.7	13540501	4 (1 0 1 1 1)
envelope glycoprotein [Human immunodeficiency virus type 1]	0.00831916	14.0919	46159.6	2290154	2 (0 1 1 0 0)
heart alpha-kinase [Homo sapiens]	0.00408757	14.0877	167101	15430294	3 (1 0 0 0 2)
ubiquitin-like 7 (bone marrow stromal cell-derived) [Homo sapiens]	8.8303e-05	14.0862	40485.3	14249682	2 (1 0 0 1 0)
hCG1815683 [Homo sapiens]	0.00933899	14.0855	21804.1	119597162	3 (1 0 1 1 0)
pol protein [Human immunodeficiency virus 1]	0.000911605	14.0851	113546	37935851	3 (1 0 1 1 0)
KIAA0350 protein [Homo sapiens]	0.00655598	14.0834	118610	20521011	2 (1 0 0 1 0)
K1045_HUMAN Protein KIAA1045	0.00791858	14.0805	45163.4	73621116	2 (1 0 0 1 0)
gag protein [Human immunodeficiency virus 1]	0.000887545	14.0805	55476.1	133902481	2 (1 0 0 1 0)
Protein of unknown function with similarity to human DOCK proteins (gua	0.00324149	14.0791	221421	6323454	4 (0 0 1 1 2)
ZBT24_HUMAN Zinc finger and BTB domain-containing protein 24 (Zinc finger pro	0.00439107	14.0725	78232.8	66774228	6 (1 3 0 1 1)
unnamed protein product [Homo sapiens]	0.0036301	14.0724	28653.8	18677070	2 (1 0 0 1 0)
sperm antigen [Homo sapiens]	0.008466	14.0723	84869.1	10798804	3 (0 0 2 0 1)
ribophorin I precursor [Homo sapiens]	0.000563094	14.0719	68526.9	4506675	3 (0 1 0 1 1)
myosin-reactive immunoglobulin heavy chain variable region [Homo sapiens]	0.00734384	14.0695	13196.4	5921593	2 (0 1 1 0 0)
hCG2040092 [Homo sapiens]	0.0011293	14.0649	15635.3	119610488	2 (1 0 0 1 0)
N-methyl-D-aspartate receptor subunit 2D precursor [Homo sapiens]	0.00965044	14.0624	143469	4504131	2 (1 0 0 1 0)
hCG37294, isoform CRA_a [Homo sapiens]	0.00484989	14.0593	46013.9	119575808	3 (0 1 1 0 1)
annexin IV [Homo sapiens]	0.00383663	14.0588	36062.2	4502105	2 (0 1 1 0 0)
immunoglobulin heavy chain variable region [Homo sapiens]	0.00896154	14.0546	10720.2	112702530	2 (1 0 0 1 0)
discs, large (Drosophila) homolog-associated protein 3 [Homo sapie	0.00438016	14.0524	105975	122937233	2 (0 1 1 0 0)
pIIIa [Human adenovirus 5]	0.00628007	14.0475	65213.1	56160538	3 (0 0 2 0 1)
GDAP1_HUMAN Ganglioside-induced differentiation-associated protein 1 (GDAP1)	4.05703e-08	12.1647	41225.8	38257679	2 (1 0 0 0 1)
BARF0 [Human herpesvirus 4 type 1]	0.00283029	12.1398	50248.1	82503272	3 (2 0 0 0 1)
G01650 malate dehydrogenase (EC 1.1.1.37), cytosolic - human [M	4.09696e-06	12.1141	36392	7431153	2 (1 0 0 0 1)
AF219274_1 envelope glycoprotein [Human immunodeficiency virus type 1] [M	0.0033873	12.106	98414.3	14039114	2 (0 1 0 1 0)
similar to olfactory specific medium-chain acyl CoA synthetase [Ho	0.00698426	12.1057	65660.8	122937307	2 (1 0 0 0 1)
keratin 73 [Homo sapiens]	0.00299303	12.1051	58886.8	28173564	3 (0 2 0 1 0)
similar to t-complex 1; T-complex locus TCP-1; t-complex 1 (a murine tcp	0.0017338	12.0888	19812.7	51094756	16 (6 4 4 1 1)
LASS3_HUMAN LAG1 longevity assurance homolog 3	0.000246547	12.08	46186.6	50401058	3 (0 0 1 1 1)
KIAA1551 protein [Homo sapiens]	0.00393462	12.0797	138473	10047167	2 (0 1 0 1 0)
immunoglobulin heavy chain [Homo sapiens]	0.00331223	12.0758	17107.7	21311285	2 (1 0 0 0 1)
BAI-associated protein 3 [Homo sapiens]	0.00272229	12.0756	131774	3929917	3 (1 0 0 1 1)
immunoglobulin heavy chain variable region [Homo sapiens]	0.00154925	12.0752	15617.9	5679468	2 (1 0 0 0 1)
GDP-mannose 4,6-dehydratase [Homo sapiens]	0.00871618	12.0723	41923.3	4504031	2 (0 1 0 1 0)
ring finger protein 4 [Homo sapiens]	0.00591456	12.0703	21305.6	4506561	2 (1 0 0 0 1)
hypothetical protein LOC54854 [Homo sapiens]	0.00674459	12.0687	51765.9	8923190	3 (0 0 1 1 1)
unnamed protein product [Homo sapiens]	0.00136615	12.0683	81211.6	10438135	2 (0 1 0 1 0)
AF363689_1 capicua protein [Homo sapiens]	0.0074096	12.068	163689	14794910	3 (0 0 0 3 0)
Zinc finger protein 792 [Homo sapiens]	0.0084034	12.0673	62633	71682791	2 (1 0 0 0 1)
novel protein similar to H.sapiens GPIAP1, GPI-anchored membrane prote	0.00274905	12.066	76646.6	148725991	3 (0 1 0 1 1)
unnamed protein product [Homo sapiens]	0.00435654	12.0659	41842.4	7020951	3 (0 1 1 1 0)
hypothetical protein LOC728621 [Homo sapiens]	0.00842795	12.0655	91277.5	124249396	2 (0 1 0 1 0)
envelope glycoprotein [Human immunodeficiency virus 1]	0.00184469	12.0647	96343.5	83854097	2 (0 1 0 1 0)
unnamed protein product [Homo sapiens]	0.00512323	12.064	114092	10434608	2 (1 0 0 0 1)
hSSH-1L [Homo sapiens]	0.00911177	12.0637	115465	18376659	2 (0 1 0 1 0)
polypeptide N-acetylgalactosaminyltransferase 8 [Homo sapiens]	0.00190261	12.0627	72805.3	8393412	2 (0 0 2 0 0)
nef protein [Human immunodeficiency virus 2]	0.00884308	12.0583	29173	30026969	2 (0 1 0 1 0)
F-box protein 47 [Homo sapiens]	0.00694197	12.0573	51961.8	56912189	2 (0 1 0 1 0)
F10A4_HUMAN Protein FAM10A4	0.0063643	12.0523	27389.7	74762505	2 (0 1 0 1 0)
HLA-G*GJ4 [Homo sapiens]	0.00986038	12.0399	31529.1	1638792	2 (0 1 0 1 0)
syntaxin 1B2 [Rattus norvegicus]	1.96868e-07	10.2223	33223.8	6981600	1 (1 0 0 0 0)
human PGP 9.5 homologue [cattle, Peptide Partial, 25 aa]	0.000280628	10.2217	2810.49	236733	3 (3 0 0 0 0)
ribosomal protein L19 [Homo sapiens]	5.00363e-09	10.2198	23451.3	4506609	1 (1 0 0 0 0)
tubulin, alpha 1a [Mus musculus]	8.90748e-08	10.2174	49927.7	6678465	1 (1 0 0 0 0)
hCG1811433, isoform CRA_a [Homo sapiens]	0.00349513	10.2137	13223.8	119631520	1 (1 0 0 0 0)
ATPase, H+ transporting, lysosomal, V0 subunit c [Homo sapiens]	6.13342e-08	10.201	15725.5	4502313	1 (1 0 0 0 0)
ribosomal protein S4, X-linked X isoform [Homo sapiens]	7.85031e-05	10.1911	29579.1	4506725	1 (1 0 0 0 0)
neural cell adhesion molecule 1 isoform 3 [Homo sapiens]	6.81758e-08	10.1833	83718	115529478	1 (1 0 0 0 0)
syntaxin 1A (brain) [Homo sapiens]	1.65015e-05	10.1789	33002.7	4759182	1 (1 0 0 0 0)
STX1B_HUMAN Syntaxin-1B1 (Syntaxin 1B)	2.15427e-06	10.174	33410.1	2501085	1 (1 0 0 0 0)
solute carrier family 25 (mitochondrial carrier; oxoglutarate carrier)	4.62228e-05	10.1737	34039.8	21361114	1 (1 0 0 0 0)
SHPS1_HUMAN Tyrosine-protein phosphatase non-receptor type substrate 1 precur	4.51489e-05	10.1699	54778.7	29427656	1 (1 0 0 0 0)
isocitrate dehydrogenase 2 (NADP+), mitochondrial precursor [Homo sapi	4.74626e-10	10.1669	50876.9	28178832	1 (1 0 0 0 0)
tubulin, beta 5 [Mus musculus]	6.10068e-07	10.1619	49639	7106439	4 (4 0 0 0 0)
mitochondrial glutamate carrier 1 [Homo sapiens]	1.13728e-06	10.1615	34448.3	13375983	1 (1 0 0 0 0)
creatine kinase, mitochondrial 1B precursor [Homo sapiens]	0.000815102	10.1538	47007.3	10334859	1 (1 0 0 0 0)
cytoskeleton associated protein [Homo sapiens]	0.000137448	10.152	21787.7	736704	1 (1 0 0 0 0)
hypothetical protein LOC23074 isoform a [Homo sapiens]	0.000115101	10.1508	164095	55749644	2 (1 1 0 0 0)
cadherin 4, type 1 preproprotein [Homo sapiens]	9.25893e-05	10.146	100218	14589893	1 (1 0 0 0 0)
SUCA_HUMAN Succinyl-CoA ligase [GDP-forming] subunit alpha, mitochondrial pre	1.96834e-06	10.1433	35025.2	20141765	1 (1 0 0 0 0)
Cytochrome c oxidase subunit Va [Homo sapiens]	0.00201157	10.1411	16751.7	18999392	3 (3 0 0 0 0)
ATP synthase, H+ transporting, mitochondrial F0 complex, subunit d isof	8.28652e-07	10.1391	18479.5	5453559	1 (1 0 0 0 0)
novel protein [Homo sapiens]	0.000773167	10.1391	10345.1	55957548	1 (1 0 0 0 0)
calcium/calmodulin-dependent protein kinase II gamma [Rattus norvegicu	3.63053e-07	10.1388	59001.1	19424316	1 (1 0 0 0 0)
calmodulin [Homo sapiens]	0.000406587	10.1388	17152	825635	1 (1 0 0 0 0)
amphiphysin isoform 2 [Homo sapiens]	0.000270642	10.137	71885	21536423	1 (1 0 0 0 0)
AF423192_1 calcium channel beta 2e subunit [Homo sapiens]	0.0049708	10.1358	68736.7	16304172	1 (1 0 0 0 0)
adenylate kinase 1 [Homo sapiens]	0.00637286	10.1315	21621.3	4502011	1 (1 0 0 0 0)
Thy-1 cell surface antigen [Homo sapiens]	1.00731e-07	10.1287	17923.3	19923362	2 (2 0 0 0 0)
palmitoyl-protein thioesterase 1 (ceroid-lipofuscinosis, neuronal 1, in	5.43753e-08	10.1272	34171.3	4506031	1 (1 0 0 0 0)
hypothetical protein LOC158763 [Homo sapiens]	0.0010484	10.1265	61625.8	40255080	1 (1 0 0 0 0)
NADH dehydrogenase (ubiquinone) 1 alpha subcomplex, 5 [Homo sapiens]	0.000362027	10.1236	13450.2	4826848	1 (1 0 0 0 0)
A Chain A, Crystal Structure Of Human P32, A Doughnut-Shaped Acidic Mitochondri	6.2273e-08	10.1227	23786.5	4930073	1 (1 0 0 0 0)
myelin basic protein isoform 4 [Homo sapiens]	0.00939784	10.1221	17332.8	68509932	2 (2 0 0 0 0)
TRAPPC2L protein [Homo sapiens]	0.00124871	10.1217	7677.86	19116195	1 (1 0 0 0 0)
unnamed protein product [Homo sapiens]	0.00531115	10.117	27528.8	10436240	4 (2 1 1 0 0)
H+-ATP synthase subunit b [Homo sapiens]	0.000145103	10.1161	28876.3	509291	1 (1 0 0 0 0)
ribosomal protein L23a [Homo sapiens]	0.00347799	10.116	17684.1	17105394	1 (1 0 0 0 0)
ATP synthase, H+ transporting, mitochondrial F1 complex, delta subunit	4.83551e-06	10.1145	17479.2	4502297	1 (1 0 0 0 0)
histone cluster 1, H1c [Homo sapiens]	0.00189894	10.1135	21351.8	4885375	1 (1 0 0 0 0)
solute carrier family 25 member 3 isoform b precursor [Homo sapiens]	4.20413e-08	10.112	39932.7	4505775	1 (1 0 0 0 0)
EPB41L3 protein [Homo sapiens]	0.000426545	10.1091	96454.3	13544009	1 (1 0 0 0 0)
calcium/calmodulin-dependent protein kinase IIB isoform 2 [Homo sapien	5.36254e-05	10.1085	60348.7	26051206	1 (1 0 0 0 0)
serine/threonine kinase receptor associated protein [Homo sapiens]	0.000732413	10.108	38414	148727341	1 (1 0 0 0 0)
DEAH (Asp-Glu-Ala-His) box polypeptide 40, isoform CRA_e [Homo sapiens]	0.00196957	10.1068	50220	119614812	3 (1 1 0 0 1)
excitatory amino acid transporter 2 [Homo sapiens]	6.7796e-07	10.1061	62063.9	40254478	2 (2 0 0 0 0)
envelope glycoprotein [Human immunodeficiency virus 1]	0.00882688	10.1059	95299.3	38491828	1 (1 0 0 0 0)
vesicle-associated membrane protein 2 (synaptobrevin 2) [Homo sapiens]	0.00182829	10.1053	12640.7	7657675	1 (1 0 0 0 0)
delta globin [Homo sapiens]	9.86187e-06	10.1048	16045.3	4504351	1 (1 0 0 0 0)
dynein, cytoplasmic 1, intermediate chain 1 [Homo sapiens]	0.000217642	10.1042	72909.7	4758178	1 (1 0 0 0 0)
ADP-ribosylation factor GTPase activating protein 1 isoform a variant [	0.00230035	10.1038	44641.2	62898415	5 (2 1 2 0 0)
GTP binding protein 5 (putative), isoform CRA_b [Homo sapiens]	6.31001e-05	10.1034	43195.7	119595793	1 (1 0 0 0 0)
cytochrome c-1 [Homo sapiens]	0.000126079	10.102	35367	21359867	1 (1 0 0 0 0)
HESB like domain containing 1 [Homo sapiens]	0.00540975	10.1017	16413.1	34996487	2 (2 0 0 0 0)
AF105020_1 putative protein O-mannosyltransferase [Homo sapiens]	0.00220345	10.101	84158.8	6492005	1 (1 0 0 0 0)
basigin isoform 1 [Homo sapiens]	0.000145974	10.0977	42174.1	38372919	1 (1 0 0 0 0)
hCG2007372 [Homo sapiens]	0.00839121	10.0964	13281.6	119629874	1 (1 0 0 0 0)
T-cell receptor beta chain V6-D-J2.1-C2 region [Homo sapiens]	0.0017187	10.0953	2650.28	1616842	1 (1 0 0 0 0)
transmembrane protein 7 [Homo sapiens]	0.00822489	10.0952	27012.7	13899263	2 (0 0 1 1 0)
CO5A3_HUMAN Collagen alpha-3(V) chain precursor	0.00556996	10.0949	171946	34223720	5 (1 2 0 1 1)
Unknown (protein for IMAGE:4536747) [Homo sapiens]	0.00128391	10.0949	101498	116283851	1 (1 0 0 0 0)
synaptosomal-associated protein 25 [Mus musculus]	9.34219e-05	10.0947	23300.2	6755588	1 (1 0 0 0 0)
transmembrane 9 superfamily member 1 isoform a [Homo sapiens]	0.00421888	10.0944	68816.5	21361315	2 (1 0 0 1 0)
dynein light chain LC8-type 2 [Mus musculus]	0.000857281	10.093	10343.1	18087731	1 (1 0 0 0 0)
transmembrane protein 4 [Homo sapiens]	0.00254959	10.0925	20639.2	7657176	1 (1 0 0 0 0)
PCDHGC3 protein [Homo sapiens]	0.00890572	10.0924	11779.3	20072757	1 (1 0 0 0 0)
pol protein [Human immunodeficiency virus 1]	0.00450554	10.0916	49574.5	38146393	4 (2 0 0 1 1)
defensin, beta 112 [Homo sapiens]	0.00514938	10.0913	12982.2	82734217	1 (1 0 0 0 0)
hypothetical protein [Homo sapiens]	0.00909695	10.091	36669	6807736	2 (2 0 0 0 0)
hypothetical protein LOC51233, isoform CRA_b [Homo sapiens]	0.00523972	10.0903	18838.7	119579990	1 (1 0 0 0 0)
AF418767_1 envelope glycoprotein gp120 [Human immunodeficiency virus 1] [	0.00508717	10.0899	19982.8	18463625	1 (1 0 0 0 0)
ADA28_HUMAN ADAM 28 precursor (A disintegrin and metalloproteinase domain 28)	0.00971521	10.0896	87151.1	14423638	2 (0 0 1 1 0)
Pol protein [Human immunodeficiency virus 1] [MAS	0.0089423	10.0891	39406.8	119661485	1 (1 0 0 0 0)
hCG1815509, isoform CRA_b [Homo sapiens]	0.00368106	10.0888	39488.3	119628941	2 (1 0 1 0 0)
phosphofructokinase, platelet [Homo sapiens]	0.00394627	10.0874	85541.6	11321601	1 (1 0 0 0 0)
complement component 1, s subcomponent [Homo sapiens]	0.00287716	10.0872	76634.9	4502495	1 (1 0 0 0 0)
envelope glycoprotein [Human immunodeficiency virus type 1]	0.0042806	10.0869	21471.2	13506305	1 (1 0 0 0 0)
hypothetical protein LOC84886 [Homo sapiens]	0.00158408	10.0867	36324.1	14249478	2 (0 1 0 0 1)
T46477 hypothetical protein DKFZp434K1831.1 - human (fragment)	0.00363128	10.0865	24293.1	11360087	2 (0 0 1 1 0)
enhancer of zeste homolog 1 [Homo sapiens]	0.000312644	10.0865	85264.6	1638875	1 (1 0 0 0 0)
B Chain B, Zn-Binding Domain Of The T347g Mutant Of Human Aminoacylase- I	0.00713391	10.0858	9775.01	42543418	1 (1 0 0 0 0)
A49166 3',5'-cyclic-AMP phosphodiesterase (EC 3.1.4.-), cyclic-GMP inhibited - human	0.00762009	10.0848	14636.2	482572	1 (1 0 0 0 0)
VP1 [Human rhinovirus QPM]	0.00568447	10.0847	30855.4	145208672	1 (1 0 0 0 0)
heterogeneous nuclear ribonucleoprotein A3 [Homo sapiens]	0.000598409	10.084	39570.5	34740329	2 (2 0 0 0 0)
unnamed protein product [Homo sapiens]	0.00962026	10.0838	60542.1	10438061	1 (1 0 0 0 0)
envelope glycoprotein [Human immunodeficiency virus 1]	0.00760365	10.0832	96255.1	73913938	1 (1 0 0 0 0)
unnamed protein product [Homo sapiens]	0.00382501	10.0831	48640.7	16553697	1 (1 0 0 0 0)
interleukin-1-related protein short isoform [Homo sapiens]	0.00325828	10.0826	19603.4	10185740	1 (1 0 0 0 0)
protein kinase C, epsilon [Homo sapiens]	0.000431308	10.0825	83620.1	4885563	2 (0 1 0 0 1)
immunoglobulin alpha heavy chain variable region [Homo sapiens]	0.00873388	10.0818	14011.9	62871218	2 (1 0 0 0 1)
circulating B cell antibody heavy chain variable region [Homo sapiens]	0.00626048	10.0818	13867.7	106897754	1 (1 0 0 0 0)
unnamed protein product [Homo sapiens]	0.00586933	10.081	19783	21755434	3 (0 0 1 0 2)
LOC401436 [Homo sapiens]	0.00618532	10.0807	10022	51094469	1 (1 0 0 0 0)
reverse transcriptase [Human immunodeficiency virus 1]	0.00235778	10.0805	21960.4	32185662	1 (1 0 0 0 0)
envelope protein [Human immunodeficiency virus 1]	0.00657177	10.0804	97368.5	148725749	1 (1 0 0 0 0)
centrosomal protein 290kDa, isoform CRA_b [Homo sapiens]	0.00906507	10.08	290782	119617820	1 (1 0 0 0 0)
AF355298_1 Gag polyprotein [Human immunodeficiency virus type 1]	0.00738469	10.08	23120.6	18389643	1 (1 0 0 0 0)
unnamed protein product [Homo sapiens]	0.00684834	10.08	52732.8	22761728	1 (1 0 0 0 0)
LATS, large tumor suppressor, homolog 2 [Homo sapiens]	0.00505056	10.0784	120060	126507091	1 (1 0 0 0 0)
adducin 1 (alpha) isoform a [Homo sapiens]	0.00366687	10.0781	80904.8	29826319	2 (0 0 1 1 0)
envelope glycoprotein [Human immunodeficiency virus type 1]	0.00216081	10.0779	13135.9	6694132	1 (1 0 0 0 0)
POLG_CXB4E Genome polyprotein [Contains: Capsid protein VP4 (P1A) (Virion prot	0.0023237	10.0772	244492	6093757	3 (0 0 0 2 1)
immunoglobulin heavy chain variable region [Homo sapiens]	0.00559384	10.0769	10936.4	112699716	1 (1 0 0 0 0)
gag polyprotein [Human immunodeficiency virus 1]	0.00314893	10.0765	16304.7	118623846	1 (1 0 0 0 0)
GCSP_HUMAN Glycine dehydrogenase [decarboxylating], mitochondrial precursor (Gl	0.0073607	10.0761	112641	121082	3 (0 0 0 2 1)
Chain , 4-Sulfatase (Human)	0.00887804	10.0759	55644.2	2914185	1 (1 0 0 0 0)
envelope glycoprotein [Human immunodeficiency virus type 1]	0.00315476	10.0756	10724.6	3832115	1 (1 0 0 0 0)
KIAA0225 [Homo sapiens]	0.00854841	10.0751	227902	1504030	2 (0 1 0 0 1)
envelope glycoprotein [Human immunodeficiency virus 1]	0.000347542	10.0749	12461.7	110007169	2 (0 0 1 1 0)
lymphocyte antigen 6 complex, locus H [Homo sapiens]	0.00643548	10.0738	14659.1	4505051	1 (1 0 0 0 0)
HPIV3 F fusion glycoprotein [Human parainfluenza virus 3]	0.00765022	10.0733	59997.6	758206	1 (1 0 0 0 0)
tat protein [Human immunodeficiency virus 1]	0.00650914	10.0728	11639.8	47118234	1 (1 0 0 0 0)
immunoglobulin heavy chain variable region [Homo sapiens]	0.00689769	10.0709	10874.3	112694370	1 (1 0 0 0 0)
envelope glycoprotein [Human immunodeficiency virus 1]	0.00468225	10.0699	19280.7	113968259	1 (1 0 0 0 0)
KIAA1822 protein [Homo sapiens]	0.00981898	10.0694	58596.1	14017861	1 (1 0 0 0 0)
envelope glycoprotein [Human immunodeficiency virus 1]	0.00549477	10.0693	96992.6	77025229	1 (1 0 0 0 0)
hCG2042180 [Homo sapiens]	0.00182792	10.0687	13964	119587398	1 (1 0 0 0 0)
envelope glycoprotein [Human immunodeficiency virus type 1]	0.00131604	10.0682	32856.7	6739777	1 (1 0 0 0 0)
FLJ37201 protein [Homo sapiens]	0.00780155	10.0674	22678.6	34191648	1 (1 0 0 0 0)
inhibitor of growth family, member 5 [Homo sapiens]	0.00839347	10.0667	27732.7	18644730	1 (1 0 0 0 0)
AF434818_1 phafin 1 [Homo sapiens]	0.00720284	10.0667	31140.7	16904138	1 (1 0 0 0 0)
dual specificity phosphatase 12 [Homo sapiens]	2.84272e-05	10.0667	37662.9	6005956	1 (1 0 0 0 0)
RNF212 protein [Homo sapiens]	0.00563636	10.0664	31183.4	71051949	1 (1 0 0 0 0)
hCG1981284 [Homo sapiens]	0.00315064	10.0662	6640.22	119619141	1 (1 0 0 0 0)
hypothetical protein LOC503737 [Danio rerio]	0.000746585	10.0653	56122.8	61651780	2 (0 0 1 1 0)
TRNA methyltransferase 12 homolog (S. cerevisiae) [Homo sapiens]	0.00171695	10.0651	50173.9	15079819	1 (1 0 0 0 0)
putative G-protein coupled receptor [Homo sapiens]	0.00955297	10.0634	44863.8	20152252	1 (1 0 0 0 0)
FLJ00067 protein [Homo sapiens]	0.00035573	10.0633	63294.7	10440462	1 (1 0 0 0 0)
ribosomal protein S16 [Homo sapiens]	0.00343431	10.0632	16435	4506691	1 (1 0 0 0 0)
envelope glycoprotein [Human immunodeficiency virus 1]	0.00682109	10.0626	95891.3	89277442	1 (1 0 0 0 0)
envelope glycoprotein [Human immunodeficiency virus 1]	0.00445448	10.0622	15833.8	45446308	2 (2 0 0 0 0)
envelope glycoprotein [Human immunodeficiency virus 1]	0.00419807	10.0616	96155.6	86277584	1 (1 0 0 0 0)
synovial sarcoma translocation gene on chromosome 18-like 1, isoform CR	0.00926102	10.0614	57190.9	119595800	1 (1 0 0 0 0)
unnamed protein product [Homo sapiens]	0.00467237	10.061	57245.8	10439296	1 (1 0 0 0 0)
hypothetical protein LOC80167 [Homo sapiens]	0.00667215	10.0602	46924	89363030	1 (1 0 0 0 0)
hCG1989298 [Homo sapiens]	0.00407161	10.0595	13080.5	119576248	1 (1 0 0 0 0)
envelope glycoprotein [Human immunodeficiency virus type 1]	0.00214124	10.0584	10675.6	12831733	1 (1 0 0 0 0)
polyprotein [Human rhinovirus 49]	0.00321321	10.0582	52140.5	38490018	1 (1 0 0 0 0)
coronin, actin binding protein, 1A [Homo sapiens]	0.000850238	10.058	50993.9	5902134	1 (1 0 0 0 0)
chromosome 11 open reading frame 59, isoform CRA_a [Homo sapiens]	0.00686803	10.058	15495.9	119595242	1 (1 0 0 0 0)
MTFR1_HUMAN Mitochondrial fission regulator 1 (Chondrocyte protein with a pol	0.00121776	10.0576	36977.4	73920234	1 (1 0 0 0 0)
sorting nexin 5 [Homo sapiens]	0.0074479	10.0571	46787.2	7657599	1 (1 0 0 0 0)
envelope glycoprotein [Human immunodeficiency virus 1]	0.00582641	10.0566	95888.4	68522131	1 (1 0 0 0 0)
AF289596_1 unknown [Homo sapiens]	0.00927131	10.0559	15956	18027396	1 (1 0 0 0 0)
hCG2045747 [Homo sapiens]	0.00448784	10.0555	6387.37	119626448	1 (1 0 0 0 0)
unnamed protein product [Homo sapiens]	0.000918163	10.0551	20681.5	34529517	1 (1 0 0 0 0)
gp160 [Human immunodeficiency virus type 1]	0.00181489	10.0549	97240.2	2415370	1 (1 0 0 0 0)
envelope glycoprotein [Human immunodeficiency virus 1]	0.00340719	10.0546	23609.8	110088213	1 (1 0 0 0 0)
syntaxin binding protein 1 [Rattus norvegicus]	0.006427	10.0543	67525.9	6981602	1 (1 0 0 0 0)
hCG1778584 [Homo sapiens]	0.00360365	10.0539	75251.4	119605338	1 (1 0 0 0 0)
gag protein [Human immunodeficiency virus type 1] [	0.00706116	10.0529	54515.6	14289983	1 (1 0 0 0 0)
dopa decarboxylase (aromatic L-amino acid decarboxylase) [Homo sapiens]	0.00665373	10.0527	53859.4	4503281	2 (0 1 0 0 1)
FLJ00281 protein [Homo sapiens]	0.00683272	10.0522	160597	34526509	1 (1 0 0 0 0)
hypothetical protein [Homo sapiens]	0.00690642	10.0514	18033.1	6599196	2 (1 0 1 0 0)
KIAA1547 protein [Homo sapiens]	0.00298039	10.0509	92894.4	10047159	1 (1 0 0 0 0)
spermatogenesis associated 6 [Homo sapiens]	0.00845388	10.0487	55953.6	9506603	1 (1 0 0 0 0)
pol protein [Human immunodeficiency virus 1]	0.00378484	10.0486	11102.5	88861674	2 (0 0 1 1 0)
CT078_HUMAN Putative uncharacterized protein C20orf78	0.00363597	10.0461	17172.5	23396531	1 (1 0 0 0 0)
serine/threonine kinase [Homo sapiens]	0.00332756	10.044	34605.6	3646280	1 (1 0 0 0 0)
gag protein [Human immunodeficiency virus type 1] [M	0.00308291	10.0436	16581.7	3947961	1 (1 0 0 0 0)
AF397448_1 TCR beta chain Vbeta 13S2A1T-RPSGLAAETQYF-Jbeta 2.5 [Homo sapi	0.00286087	10.0395	13824	15128193	1 (1 0 0 0 0)
S31503 H+/K+-exchanging ATPase (EC 3.6.3.10) ATP1AL1 - human (fragment)	0.000130605	8.19618	10485.2	346261	1 (0 1 0 0 0)
A55877 tumor necrosis factor type 1 receptor associated protein TRAP-1 - human	2.0795e-06	8.18576	75295	1082886	3 (2 1 0 0 0)
hCG1747788 [Homo sapiens]	0.0010595	8.17729	14554.8	119608911	5 (0 0 3 1 1)
hypothetical protein LOC345651 [Homo sapiens]	7.18875e-05	8.16474	41976	63055057	4 (0 2 1 1 0)
hCG1643126, isoform CRA_b [Homo sapiens]	6.51251e-06	8.16331	14164.3	119621546	1 (0 1 0 0 0)
DPYL4_HUMAN Dihydropyrimidinase-related protein 4 (DRP-4) (Collapsin response	0.00151394	8.15172	61838.5	68067941	3 (1 2 0 0 0)
envelope glycoprotein [Human immunodeficiency virus 1]	0.00296359	8.14414	9311.87	38018627	1 (0 1 0 0 0)
tubulin, alpha 4 [Mus musculus]	1.55343e-07	8.14108	49892.4	6678467	3 (2 1 0 0 0)
S34775 nicotinic acetylcholine receptor epsilon chain precursor - human	0.000171381	8.12769	54581.4	479584	1 (0 1 0 0 0)
nudix -type motif 12 [Homo sapiens]	0.00125743	8.12458	52042.8	13899267	1 (0 1 0 0 0)
WMBEHQ UL5 protein - human herpesvirus 2 (strain HG52) (fragment)	0.00224157	8.12031	88093.8	74001	2 (0 2 0 0 0)
reverse transcriptase [Human immunodeficiency virus 1]	0.00263399	8.11582	32923	55705774	1 (0 1 0 0 0)
polyprotein [Human enterovirus B]	0.000291946	8.11517	7487.59	74179360	4 (0 2 0 0 2)
gag protein [Human immunodeficiency virus 1]	0.00127044	8.11121	55119.2	90812182	1 (0 1 0 0 0)
envelope glycoprotein [Human immunodeficiency virus 1]	0.00437645	8.1089	96866.1	84371374	2 (0 1 1 0 0)
immunoglobulin heavy chain variable region [Homo sapiens]	0.00300471	8.10601	14672.3	39939587	2 (0 1 0 0 1)
ATP synthase, H+ transporting, mitochondrial F1 complex, beta subunit	3.21507e-06	8.10528	56524.7	32189394	6 (1 5 0 0 0)
actin-like protein [Homo sapiens]	1.28112e-06	8.10454	11528.9	62421162	4 (0 2 1 1 0)
suppressor of G2 allele of SKP1 [Homo sapiens]	0.00310803	8.10441	37780.9	5730041	1 (0 1 0 0 0)
hypothetical protein DKFZp434N035, isoform CRA_c [Homo sapiens]	0.00777787	8.09781	32819.9	119571010	1 (0 1 0 0 0)
delta-globin Troodos variant [Homo sapiens]	0.000150157	8.09739	15992.2	73762521	6 (1 5 0 0 0)
ring finger and CCCH-type zinc finger domains 2 [Homo sapiens]	0.00787145	8.09593	96287.6	9256537	1 (0 1 0 0 0)
goosecoid [Homo sapiens]	0.00638826	8.09565	28132.1	27777663	1 (0 1 0 0 0)
pol polyprotein [Human immunodeficiency virus type 1]	0.00909513	8.09552	42402.6	13736632	1 (0 1 0 0 0)
actin-like protein [Homo sapiens]	0.00103136	8.0953	11548	62420916	1 (0 1 0 0 0)
protease [Human immunodeficiency virus 1]	0.00116041	8.09512	10708.9	63015070	2 (0 1 1 0 0)
vpu protein [Human immunodeficiency virus 1]	0.000627025	8.09491	9175.93	37682867	1 (0 1 0 0 0)
carnitine/acylcarnitine translocase [Homo sapiens]	0.00444026	8.09445	32839	5851675	2 (0 0 1 0 1)
lectin, galactoside-binding, soluble, 8 (galectin 8) [Homo sapiens] [MA	0.00851286	8.09375	22401.6	55959419	2 (0 1 0 0 1)
hCG2045069 [Homo sapiens]	0.000198028	8.09135	9989.71	119576538	1 (0 1 0 0 0)
envelope glycoprotein [Human immunodeficiency virus type 1]	0.00727696	8.09018	44722.6	1946756	1 (0 1 0 0 0)
acyl-Coenzyme A oxidase-like, isoform CRA_c [Homo sapiens]	0.00215285	8.08995	15432.8	119570744	1 (0 1 0 0 0)
gag protein [Human immunodeficiency virus 1]	0.00277534	8.08866	8172.14	148361666	1 (0 1 0 0 0)
gp120 [Human immunodeficiency virus type 1]	0.00247285	8.08855	24602.6	4071189	1 (0 1 0 0 0)
FLJ00181 protein [Homo sapiens]	0.00159518	8.08837	41493.1	18676568	1 (0 1 0 0 0)
hCG1659708 [Homo sapiens]	0.00674236	8.08768	26025.7	119624688	2 (0 0 1 0 1)
immunoglobulin heavy chain variable region [Homo sapiens]	0.00648065	8.08748	10855.2	112700376	2 (0 1 0 1 0)
estrogen receptor 1 [Homo sapiens]	0.0061617	8.08578	66173.2	62821794	2 (0 0 1 0 1)
COG3_HUMAN Conserved oligomeric Golgi complex component 3 (Vesicle docking pr	0.00219784	8.08559	94036.4	85701302	2 (0 0 1 0 1)
immunoglobulin heavy chain variable region [Homo sapiens]	0.00198318	8.0849	10826.1	112695493	1 (0 1 0 0 0)
interleukin 23 receptor isoform 3 F1 [Homo sapiens]	0.000362765	8.08474	36686.1	62870705	1 (0 1 0 0 0)
l(3)mbt-like isoform I [Homo sapiens]	0.00708495	8.08383	85862.6	117938328	1 (0 1 0 0 0)
hCG2010747 [Homo sapiens]	0.000722638	8.08199	11936.9	119579985	3 (1 1 0 0 1)
envelope glycoprotein [Human immunodeficiency virus 1]	0.000851064	8.08173	95660.2	86753469	2 (0 1 1 0 0)
AF484514_7 envelope glycoprotein [Human immunodeficiency virus 1]	0.00720856	8.08061	95295.6	25166997	2 (0 0 1 0 1)
penton base protein [Human adenovirus type 3]	0.00375358	8.08045	61778.1	444050	1 (0 1 0 0 0)
pol protein [Human immunodeficiency virus 1]	0.000911605	8.07987	37403.8	34559097	1 (0 1 0 0 0)
cadherin 19, type 2 preproprotein [Homo sapiens]	0.00077273	8.07905	86948.2	12656655	2 (0 0 1 0 1)
gp160 [Human immunodeficiency virus 1]	0.00995666	8.07896	31433.2	572723	2 (0 0 0 2 0)
osteoglycin preproprotein isoform 2 [Homo sapiens]	0.00187416	8.07883	33900.9	7661704	1 (0 1 0 0 0)
unnamed protein product [Homo sapiens]	0.0076123	8.07838	54221.2	22760572	1 (0 1 0 0 0)
envelope glycoprotein [Human immunodeficiency virus type 1]	0.00846639	8.07836	23747.9	4323112	2 (0 0 0 2 0)
hCG2031596 [Homo sapiens]	0.00330499	8.07823	3149.59	119627092	1 (0 1 0 0 0)
envelope protein [Human papillomavirus type 10]	0.00128335	8.07734	42976.2	9627261	2 (0 0 1 0 1)
hCG1996150, isoform CRA_a [Homo sapiens]	0.00263415	8.07681	11341.5	119622993	1 (0 1 0 0 0)
DUS15_HUMAN Dual specificity protein phosphatase 15 (Vaccinia virus VH1-relat	0.00227201	8.07663	31861.1	30316387	1 (0 1 0 0 0)
gag protein [Human immunodeficiency virus 1]	0.00314893	8.07653	17997.5	120564392	1 (0 1 0 0 0)
cartilage associated protein precursor [Homo sapiens]	0.00263427	8.07588	46532	5453601	2 (0 0 1 0 1)
U13 [Human herpesvirus 6B]	0.00998316	8.07491	12039.2	4996001	1 (0 1 0 0 0)
ribonuclease, RNase A family, 10 (non-active) [Homo sapiens]	0.00126195	8.07425	23992.8	61175227	1 (0 1 0 0 0)
ZN778_HUMAN Zinc finger protein 778	0.00571311	8.07339	77463.3	119368828	1 (0 1 0 0 0)
bromodomain adjacent to zinc finger domain 2B [Homo sapiens]	0.00281142	8.07249	220727	6683500	2 (0 1 1 0 0)
Env [Human immunodeficiency virus 1]	0.00845294	8.07229	97700.4	114431009	1 (0 1 0 0 0)
immunoglobulin heavy chain variable region [Homo sapiens]	0.00843697	8.07132	13331.6	114147429	1 (0 1 0 0 0)
envelope glycoprotein [Human immunodeficiency virus 1]	0.00168887	8.07096	16875.3	74476431	1 (0 1 0 0 0)
unnamed protein product [Homo sapiens]	0.00677828	8.06985	30554.5	10434593	1 (0 1 0 0 0)
envelope glycoprotein [Human immunodeficiency virus 1]	0.00144611	8.06936	13218.6	30143406	1 (0 1 0 0 0)
immunoglobulin heavy chain variable region [Homo sapiens]	0.00794222	8.06918	12884.3	47846741	1 (0 1 0 0 0)
dual specificity phosphatase 8 [Homo sapiens]	0.00130682	8.06911	65799.6	4758212	1 (0 1 0 0 0)
unnamed protein product [Homo sapiens]	0.00617436	8.06875	45895.1	10438739	1 (0 1 0 0 0)
PO-GA [Homo sapiens]	0.00270796	8.06805	128203	296908	1 (0 1 0 0 0)
unnamed protein product [Homo sapiens]	0.00821823	8.06686	31948.2	7022177	1 (0 1 0 0 0)
unnamed protein product [Homo sapiens]	0.00303127	8.06664	39348	10435814	1 (0 1 0 0 0)
aquaporin 10, isoform CRA_c [Homo sapiens]	0.00842129	8.06646	31714.6	119573596	1 (0 1 0 0 0)
envelope glycoprotein [Human immunodeficiency virus type 1]	0.000781738	8.06634	13229.1	6693952	1 (0 1 0 0 0)
immunoglobulin heavy chain [Homo sapiens]	0.00430889	8.06536	13465.5	47600827	1 (0 1 0 0 0)
solute carrier family 25 (mitochondrial carrier, Aralar), member 12 [H	0.00878574	8.06449	74715	21361103	1 (0 1 0 0 0)
polyprotein [Human echovirus 13]	0.00219519	8.06436	31804.1	110350259	1 (0 1 0 0 0)
A Chain A, Up1, The Two Rna-Recognition Motif Domain Of Hnrnp A1	0.00109708	8.06403	22249.2	20664272	2 (0 0 1 0 1)
hCG2045581 [Homo sapiens]	0.00959155	8.0638	4672.38	119613079	1 (0 1 0 0 0)
COA2_HUMAN Acetyl-CoA carboxylase 2 (ACC-beta) [Includes: Biotin carboxylase	0.00740996	8.06368	276377	134047740	1 (0 1 0 0 0)
pol protein [Human immunodeficiency virus 1]	0.00671453	8.06337	24637.2	116279741	1 (0 1 0 0 0)
LOC401390 [Homo sapiens]	0.00688701	8.06198	16571.9	51094640	1 (0 1 0 0 0)
phosphoprotein p53 [Homo sapiens]	0.00164455	8.06184	4347.11	38194463	1 (0 1 0 0 0)
hypothetical protein LOC399474 [Homo sapiens]	0.00747383	8.0611	32729.4	51242137	1 (0 1 0 0 0)
GRIK3_HUMAN Glutamate receptor, ionotropic kainate 3 precursor (Glutamate rece	0.00380781	8.06076	103965	3287976	1 (0 1 0 0 0)
putative [Homo sapiens]	0.00305973	8.05971	2212.17	553734	4 (2 2 0 0 0)
NID2_HUMAN Nidogen-2 precursor (NID-2) (Osteonidogen)	0.000786391	8.05957	151299	8928569	1 (0 1 0 0 0)
envelope glycoprotein [Human immunodeficiency virus 1]	0.00401001	8.05944	12042.2	115279874	1 (0 1 0 0 0)
emopamil binding protein (sterol isomerase) [Homo sapiens]	0.00370945	8.05944	26335.8	5729810	1 (0 1 0 0 0)
sideroflexin 2 [Homo sapiens]	0.00687905	8.05935	36207.8	30578418	1 (0 1 0 0 0)
gag protein [Human immunodeficiency virus type 1] [	0.00476503	8.05906	55903.5	17046752	1 (0 1 0 0 0)
gp120 protein [Human immunodeficiency virus 1] [MA	0.00377195	8.05818	23357.6	34786572	1 (0 1 0 0 0)
envelope glycoprotein [Human immunodeficiency virus type 1]	0.00564671	8.05697	9924.17	15429875	1 (0 1 0 0 0)
K1 protein [Human herpesvirus 8]	0.00461269	8.05613	10244.3	37576728	1 (0 1 0 0 0)
unnamed protein product [Homo sapiens]	0.00423242	8.056	27202.8	34527305	1 (0 1 0 0 0)
pol protein [Human immunodeficiency virus 1]	0.00675708	8.0551	74797.6	37221213	2 (0 0 0 2 0)
L36874_3 vif protein [Human immunodeficiency virus 2]	0.00315627	8.05507	24820.8	16905447	2 (0 0 0 2 0)
hypothetical protein LOC56683 [Homo sapiens]	0.00350304	8.05492	33203.2	11037061	1 (0 1 0 0 0)
pol protein [Human immunodeficiency virus 1]	0.00614855	8.05459	24565.7	116282091	1 (0 1 0 0 0)
GAK8_HUMAN HERV-K_3q12.3 provirus ancestral Gag polyprotein (Gag polyprotein)	0.00853266	8.05306	73541.7	50400656	1 (0 1 0 0 0)
gag protein [Human immunodeficiency virus 1]	0.00838248	8.05208	14749.5	80975325	1 (0 1 0 0 0)
unnamed protein product [Homo sapiens]	0.00131296	8.05076	72744.5	10437948	2 (0 0 0 2 0)
DAN26 [Homo sapiens]	0.00320733	8.04975	52498.4	1770394	1 (0 1 0 0 0)
unnamed protein product [Homo sapiens]	0.00753782	8.04927	30182	34532462	1 (0 1 0 0 0)
nucleoporin 98kDa, isoform CRA_a [Homo sapiens]	0.00784373	8.04866	141319	119622966	1 (0 1 0 0 0)
2'-5' oligoadenylate binding protein; endoribonuclease [Homo sapiens] [MA	0.00211542	8.04755	45534.6	608723	2 (0 0 0 2 0)
nucleolar protein 1, 120kDa [Homo sapiens]	0.00920218	8.04654	67079.1	119609186	1 (0 1 0 0 0)
hCG2039668, isoform CRA_e [Homo sapiens]	0.00928436	8.04639	39818.2	119611688	1 (0 1 0 0 0)
tat protein [Human immunodeficiency virus 1]	0.00383881	8.04592	4988.29	114801687	1 (0 1 0 0 0)
similar to XM_027825 proteasome (prosome, macropain) subunit, beta type	0.00022629	8.04568	23663.7	29841433	1 (0 1 0 0 0)
fiber protein [Human adenovirus type 27]	0.00922796	8.04519	32600.7	82523521	1 (0 1 0 0 0)
Nef	0.00689342	8.04438	23348.4	1457983	1 (0 1 0 0 0)
otopetrin 2 [Homo sapiens]	0.00322296	8.04395	62804.4	119609619	1 (0 1 0 0 0)
PRKG1 protein [Homo sapiens]	0.00686729	8.04005	77712.6	148342515	1 (0 1 0 0 0)
protease [Human immunodeficiency virus 1]	0.00798135	8.03908	15110.1	33771811	1 (0 1 0 0 0)
envelope glycoprotein [Human immunodeficiency virus 2]	0.00975314	8.03823	14849.3	50593357	1 (0 1 0 0 0)
unnamed protein product [Homo sapiens]	0.00130828	8.03693	18669.5	34530276	1 (0 1 0 0 0)
envelope glycoprotein [Human immunodeficiency virus 1]	0.00061588	6.10967	38900.1	45359551	6 (0 3 2 1 0)
putative endonuclease V [Dictyostelium discoideum AX4]	0.0079938	6.10228	61779.4	66819958	2 (0 1 1 0 0)
hCG17318, isoform CRA_b [Homo sapiens]	0.00175794	6.09542	25812.3	119585880	3 (1 0 1 0 1)
structural maintenance of chromosomes 2-like 1 [Homo sapiens]	0.00456451	6.09149	135572	110347418	2 (0 0 0 1 1)
zinc finger homeobox 2, isoform CRA_d [Homo sapiens]	0.0033079	6.08787	288847	119586549	2 (0 0 0 1 1)
zinc finger, FYVE domain containing 9 isoform 3 [Homo sapiens]	0.00222575	6.08224	156302	47717106	3 (0 1 0 1 1)
RNA binding motif protein, X-linked [Homo sapiens]	0.0097689	6.07656	42306.3	56699409	2 (0 0 0 1 1)
RNA dependent RNA polymerase [Human metapneumovirus]	0.00991191	6.07386	230610	46852141	2 (0 0 0 1 1)
hypothetical protein LOC644907 [Homo sapiens]	0.00833586	6.05341	15740.6	147900596	2 (0 1 1 0 0)
envelope glycoprotein [Human immunodeficiency virus type 1]	0.000943891	4.10532	57535.7	19568959	4 (2 1 0 1 0)
protocadherin beta 4 precursor [Homo sapiens]	0.00755705	4.09373	87216.5	9256616	2 (0 1 0 1 0)
hypothetical protein LOC91828 [Homo sapiens]	0.0046612	4.092	79846.3	117938266	5 (0 2 1 1 1)
AF471380_1 Ig heavy chain variable region, VH3 family [Homo sapiens] [MAS	0.00415113	4.09115	13002.3	33319304	2 (1 0 0 1 0)
CAGL79 [Homo sapiens]	0.00635983	4.08789	43279.8	2565077	2 (0 0 0 0 2)
hepatoma-derived growth factor (high-mobility group protein 1-like) [Ho	0.00545281	4.08484	26771.9	4758516	2 (0 1 0 1 0)
AF471580_1 Ig heavy chain variable region, VH3 family [Homo sapiens] [MAS	0.00392376	4.07458	12888.3	33319704	2 (0 1 0 1 0)
epithelial amiloride-sensitive sodium channel, gamma-subunit [Homo sapie	0.00193469	4.06136	74127.1	1004273	2 (0 0 0 0 2)
envelope glycoprotein [Human immunodeficiency virus 1]	4.63122e-05	4.0596	10798.4	37695029	2 (0 0 0 0 2)
EGL nine (C.elegans) homolog 2 [Homo sapiens]	0.00496654	4.05758	43622.8	16604260	2 (0 0 0 0 2)
Tax1 (human T-cell leukemia virus type I) binding protein 3 [Xenopus tr	0.00618995	4.05599	15130.8	89270401	2 (0 0 0 0 2)
FAM26A protein [Homo sapiens]	0.00115319	2.10647	23499.1	24659044	2 (1 0 0 0 1)
immunoglobulin kappa light chain [Homo sapiens] [MA	0.00877681	2.07745	11497.8	1561602	5 (1 0 1 2 1)
olfactory receptor, family 1, subfamily M, member 1 [Homo sapiens]	0.00292358	2.07086	34816.2	52218828	2 (0 1 0 0 1)
envelope glycoprotein [Human immunodeficiency virus 1]	0.00816255	2.0621	95823	117338692	2 (1 0 0 0 1)
637

## Sheet: Control_2_FA
Description	P-value	Score	Coverage	MW	Accession	Peptide (Hits)
I38369 beta-tubulin - human	3.53939e-12	98.2426		48848.5	2119276	18 (16 1 0 1 0)
glial fibrillary acidic protein [Homo sapiens]	2.5602e-08	94.2315		49849.7	4503979	22 (18 1 1 1 1)
ferritin, heavy polypeptide 1 [Homo sapiens]	8.88178e-15	80.3302		21212.3	56682959	25 (23 0 2 0 0)
brain creatine kinase [Homo sapiens]	2.55297e-10	80.1977		42617.4	21536286	20 (19 0 0 0 1)
tubulin, beta 4 [Homo sapiens]	4.88934e-08	78.2253		49553.9	21361322	19 (16 2 0 0 1)
tubulin alpha 6 [Homo sapiens]	7.56401e-08	68.179		49863.5	14389309	17 (16 1 0 0 0)
2',3'-cyclic-nucleotide 3'-phosphodiesterase (EC 3.1.4.37)	2.86629e-05	66.0957		45070.4	180687	10 (6 3 1 0 0)
neurofilament, medium polypeptide 150kDa [Homo sapiens]	1.50779e-07	50.1815		102386	4885513	6 (4 0 1 1 0)
microtubule-associated protein 2 [Homo sapiens]	3.40059e-06	46.1382		199045	1850617	6 (5 0 1 0 0)
ferritin, light polypeptide [Homo sapiens]	4.01479e-11	40.2083		20007.1	20149498	8 (8 0 0 0 0)
neurofilament, light polypeptide 68kDa [Homo sapiens]	2.14318e-07	40.1139		61479.3	105990539	5 (4 0 0 1 0)
tubulin, alpha 1B [Mus musculus]	4.65854e-09	30.2353		50119.6	34740335	7 (7 0 0 0 0)
KIAA0968 protein [Homo sapiens]	1.49918e-09	30.1467		58985.2	4589580	3 (3 0 0 0 0)
unnamed protein product [Homo sapiens]	3.70789e-07	28.2131		49811	10433717	5 (2 1 2 0 0)
histone H2B [Homo sapiens]	7.22616e-06	28.1929		13927.6	1568557	8 (6 1 0 1 0)
envelope glycoprotein [Human immunodeficiency virus 1]	0.00827247	28.1138		31845	99029604	14 (4 6 3 1 0)
catenin (cadherin-associated protein), beta 1, 88kDa [Homo sapiens]	0.00771843	28.0752		85442.3	4503131	4 (1 1 1 1 0)
alpha 1 type XXIV collagen precursor [Homo sapiens]	0.00963801	26.0799		175395	32364065	3 (2 0 1 0 0)
ATP synthase, H+ transporting, mitochondrial F1 complex, alpha subunit	3.15925e-11	24.2075		59713.7	4757810	3 (2 0 0 1 0)
myelin basic protein isoform 1 [Homo sapiens]	4.96712e-07	24.1465		21480	68509930	5 (3 1 1 0 0)
A Chain A, Crystal Structure Of A DictyosteliumTETRAHYMENA CHIMERA Actin	4.51415e-08	20.1955		41719.9	7245526	5 (4 1 0 0 0)
cofilin 1 (non-muscle) [Homo sapiens]	0.00661758	20.1245		18490.7	5031635	2 (2 0 0 0 0)
dihydropyrimidinase-like 2 [Homo sapiens]	0.00729885	20.0964		62254.7	4503377	2 (2 0 0 0 0)
unknown [Homo sapiens]	0.000566858	20.0866		268547	62988842	2 (2 0 0 0 0)
heterogeneous nuclear ribonucleoprotein H2 [Homo sapiens]	0.00292136	20.0813		49232.3	9624998	5 (1 2 0 1 1)
calcium/calmodulin-dependent protein kinase IIB isoform 8 [Homo sapien	0.00216766	20.0775		50923	26051218	2 (2 0 0 0 0)
CENPE_HUMAN Centromeric protein E (CENP-E)	0.00822817	20.0661		311896	399227	3 (0 1 2 0 0)
DEAH (Asp-Glu-Ala-His) box polypeptide 15 [Homo sapiens]	0.00822221	20.0554		90875.3	68509926	2 (2 0 0 0 0)
glutamate transporter [Homo sapiens]	0.00240942	18.1155		61664.6	488752	3 (1 1 1 0 0)
syntaxin binding protein 1 isoform a [Homo sapiens]	3.46559e-06	18.1084		68692.3	4507297	2 (1 1 0 0 0)
KIAA1529 protein [Homo sapiens]	0.000861078	18.1037		194575	7959325	3 (2 1 0 0 0)
origin recognition complex, subunit 2 [Homo sapiens]	0.00870469	18.102		65931	5453830	3 (1 2 0 0 0)
RB18A protein [Homo sapiens]	0.00253952	18.0988		166466	2765322	2 (1 1 0 0 0)
hCG2033802 [Homo sapiens]	0.00743199	18.073		15832.3	119618860	2 (1 1 0 0 0)
cGMP-dependant protein kinase [Homo sapiens]	0.00817989	18.0666		84111.9	3123587	3 (1 0 0 2 0)
FAM98C protein [Homo sapiens]	0.00339623	18.0656		27339.2	51873920	3 (2 1 0 0 0)
envelope glycoprotein [Human immunodeficiency virus 1]	0.00173441	18.058		95623.8	29409313	5 (0 2 0 2 1)
KIAA1543 protein [Homo sapiens]	0.00352833	18.0414		98004.2	7959353	2 (1 1 0 0 0)
hypothetical protein [Homo sapiens]	0.00204021	16.0857		150083	51476276	2 (1 0 1 0 0)
integrin alpha M precursor [Homo sapiens]	0.000256563	16.0814		127099	88501734	2 (1 0 1 0 0)
death inducer-obliterator-3 [Homo sapiens]	0.00506724	16.0534		243721	44971714	4 (0 3 0 1 0)
crystallin, alpha B [Homo sapiens]	0.00968488	14.1318		20146.4	4503057	2 (1 0 0 1 0)
protein kinase C, gamma [Homo sapiens]	0.000353902	14.09		78397.3	13384594	2 (1 0 0 1 0)
hCG1639857 [Homo sapiens]	0.00492739	14.0632		36288.4	119579837	2 (1 0 0 1 0)
Nef protein [Human immunodeficiency virus 1]	0.00735212	14.0623		23305.5	7416232	2 (0 1 1 0 0)
envelope glycoprotein [Human immunodeficiency virus 1]	0.00648413	14.0554		99108.7	74315786	2 (1 0 0 1 0)
citron [Homo sapiens]	0.00746465	14.0484		231284	32698688	3 (0 1 1 0 1)
cordon-bleu homolog (mouse) [Homo sapiens]	0.00293412	14.046		135504	51094645	3 (0 1 1 0 1)
hypothetical protein [Homo sapiens]	0.00828652	12.1579		17565.7	57997513	7 (2 2 2 0 1)
PLIN_HUMAN Perilipin (PERI) (Lipid droplet-associated protein)	0.00530884	12.0884		55915.9	8134637	3 (1 0 0 1 1)
BcLF1 [Human herpesvirus 4 type 1]	0.000366672	12.078		153819	82503253	2 (1 0 0 0 1)
transcription factor BMAL2 [Homo sapiens]	0.0070426	12.0778		61747.8	9279803	3 (2 0 0 0 1)
MORC family CW-type zinc finger 3 [Homo sapiens]	0.000258541	12.0498		107045	28872812	2 (1 0 0 0 1)
hypothetical protein ( (L11645) alpha-tubulin [Homo sapiens] ) [Neuros	1.69468e-07	10.2481		10326.7	85091443	3 (3 0 0 0 0)
H2A histone family, member O [Homo sapiens]	1.96413e-06	10.2071		14086.9	4504251	2 (2 0 0 0 0)
A40671 dynamin, internal form 1, long C-terminal form - human [M	0.00216179	10.1573		97201	539580	1 (1 0 0 0 0)
A45036 single-stranded-DNA-binding protein Pur alpha - human [MA	3.63058e-06	10.1491		34948.5	346338	1 (1 0 0 0 0)
T cell receptor alpha chain [Homo sapiens]	0.00709965	10.1442		4367.27	3089417	1 (1 0 0 0 0)
unnamed protein product [Homo sapiens]	0.00235299	10.1434		50621.8	10435466	3 (2 0 0 1 0)
unnamed protein product [Homo sapiens]	0.00614071	10.1406		30614	22760872	4 (1 1 0 1 1)
H1 histone family, member 0 [Homo sapiens]	0.000148565	10.1352		20850.2	4885371	2 (2 0 0 0 0)
VP-1 capsid protein [Human poliovirus 1]	0.000482983	10.1345		10539.1	12231217	1 (1 0 0 0 0)
histone H2A [Homo sapiens]	0.000141952	10.1339		13986.8	28195394	3 (3 0 0 0 0)
H2A histone family, member A [Homo sapiens]	0.000475648	10.1257		14127	10645195	6 (5 1 0 0 0)
delta globin [Homo sapiens]	1.26875e-06	10.1237		16045.3	4504351	1 (1 0 0 0 0)
defensin, beta 130 [Homo sapiens]	0.00724958	10.1118		8729.73	83699414	11 (6 1 2 1 1)
S68466 translation elongation factor EF-Tu-like protein P43 precursor, mitochondria	0.000267083	10.1099		49502.2	7443384	1 (1 0 0 0 0)
hCG19802, isoform CRA_b [Homo sapiens]	0.000431783	10.1066		41043.2	119587277	1 (1 0 0 0 0)
gag protein [Human immunodeficiency virus 1]	0.00114336	10.1062		11215.1	73913159	1 (1 0 0 0 0)
hypothetical protein LOC169436 [Homo sapiens]	0.00423839	10.1061		75627.2	76563908	2 (1 0 0 1 0)
synapsin I isoform Ia [Homo sapiens]	6.76681e-05	10.105		74065.8	19924099	1 (1 0 0 0 0)
calmodulin [Homo sapiens]	4.38315e-07	10.1042		17152	825635	1 (1 0 0 0 0)
GOLPH2 [Homo sapiens]	0.00291676	10.1001		45202.8	48146519	2 (1 0 1 0 0)
calcium/calmodulin-dependent protein kinase II gamma isoform 1 [Mus mu	0.000390081	10.0985		59569.4	75991700	1 (1 0 0 0 0)
heavy neurofilament subunit [Homo sapiens]	0.00131806	10.0982		111713	1841430	1 (1 0 0 0 0)
VENT homeobox [Homo sapiens]	0.00140064	10.0973		27534.7	7657180	1 (1 0 0 0 0)
hCG1791182 [Homo sapiens]	0.00600772	10.0973		11057.6	119590856	4 (1 0 2 1 0)
eukaryotic translation elongation factor 1 alpha 1 [Homo sapiens]	0.00570047	10.0964		50109.2	4503471	1 (1 0 0 0 0)
ubiquitin carboxyl-terminal esterase L1 (ubiquitin thiolesterase) [Hom	2.89835e-07	10.0956		24808.5	21361091	2 (2 0 0 0 0)
KRHU2 keratin 1, type II, cytoskeletal - human	0.000365034	10.0954		65454.4	7428712	5 (2 2 0 1 0)
class IVb beta tubulin [Homo sapiens]	0.00425364	10.0936		49721	27368062	1 (1 0 0 0 0)
tubulin, beta 2 [Homo sapiens]	0.00848453	10.0926		49875	4507729	1 (1 0 0 0 0)
calcium/calmodulin-dependent protein kinase II delta isoform 1 [Homo s	1.32546e-05	10.091		54093.6	26667183	1 (1 0 0 0 0)
Na+/K+ -ATPase alpha 2 subunit proprotein [Homo sapiens]	0.000222785	10.09		112194	4502271	1 (1 0 0 0 0)
AF275810_1 PNAS-114 [Homo sapiens]	0.00282094	10.0894		14431.9	10834781	1 (1 0 0 0 0)
SECIS binding protein 2 [Homo sapiens]	0.000728315	10.0888		95402.4	83779010	1 (1 0 0 0 0)
KIAA0856 protein [Homo sapiens]	0.00299873	10.0876		250097	20521676	1 (1 0 0 0 0)
unnamed protein product [Homo sapiens]	0.00722301	10.0824		52732.8	22761728	1 (1 0 0 0 0)
EXOC3 protein [Homo sapiens]	0.00608613	10.0822		68215.4	37589887	1 (1 0 0 0 0)
KIAA0869 protein [Homo sapiens]	0.00489433	10.0789		98891.2	4240227	1 (1 0 0 0 0)
KIAA0870 protein [Homo sapiens]	0.00410675	10.0786		115806	6635137	1 (1 0 0 0 0)
ATP synthase, H+ transporting, mitochondrial F0 complex, subunit d isof	6.05895e-05	10.0777		18479.5	5453559	1 (1 0 0 0 0)
HtrA serine peptidase 4 [Homo sapiens]	0.00110163	10.0776		50946.3	24308541	1 (1 0 0 0 0)
KIAA1503 protein [Homo sapiens]	0.00663963	10.0767		511170	71891729	1 (1 0 0 0 0)
reverse transcriptase [Human immunodeficiency virus 1]	0.00939939	10.0752		17200.2	7542815	1 (1 0 0 0 0)
hCG2040495 [Homo sapiens]	0.00722774	10.0745		25103.3	119573197	1 (1 0 0 0 0)
glyceraldehyde-3-phosphate dehydrogenase [Homo sapiens]	3.25549e-05	10.0721		36030.4	7669492	1 (1 0 0 0 0)
hypothetical protein LOC152002 [Homo sapiens]	0.00435008	10.0713		43778.4	112181295	1 (1 0 0 0 0)
MKS3_HUMAN Meckelin (Meckel syndrome type 3 protein) (Transmembrane protein 6	0.00551732	10.0702		111658	74707893	2 (1 0 0 1 0)
envelope glycoprotein; gp120 [Human immunodeficiency virus 1]	0.00163933	10.0684		24966.8	18536350	1 (1 0 0 0 0)
prefoldin subunit 2 [Homo sapiens]	0.00288363	10.0678		16637.6	12408675	1 (1 0 0 0 0)
hCG1811730 [Homo sapiens]	0.00245103	10.0671		11016.4	119575293	1 (1 0 0 0 0)
AF170031_1 envelope glycoprotein [Human immunodeficiency virus type 2] [M	0.00879868	10.067		83129.4	11990516	1 (1 0 0 0 0)
unnamed protein product [Homo sapiens]	0.000844741	10.0668		27528.8	10436240	1 (1 0 0 0 0)
coiled-coil domain containing 110 [Homo sapiens]	0.00273343	10.0668		96665	22749515	1 (1 0 0 0 0)
hCG1778814 [Homo sapiens]	0.00309711	10.0648		10287.3	119568900	1 (1 0 0 0 0)
potassium voltage-gated channel, subfamily H, member 8 [Homo sapiens]	0.00531791	10.0645		123726	27886667	1 (1 0 0 0 0)
gag protein [Human immunodeficiency virus 1]	0.00883716	10.0644		55802.7	87131022	1 (1 0 0 0 0)
RAB6B, member RAS oncogene family [Mus musculus]	0.00225946	10.064		23446.9	30424655	1 (1 0 0 0 0)
envelope glycoprotein [Human immunodeficiency virus 1]	0.00951292	10.0631		16630.8	28628233	1 (1 0 0 0 0)
splicing factor, arginine/serine-rich 3 [Homo sapiens]	3.59643e-05	10.061		19317.9	4506901	1 (1 0 0 0 0)
HGFL gene [Homo sapiens]	0.00563377	10.0582		28215.9	15029677	2 (1 0 1 0 0)
tubulin, alpha-like 3 [Homo sapiens]	0.00434102	10.0574		49876.8	13376181	1 (1 0 0 0 0)
KIAA0252 [Homo sapiens]	0.00919595	10.0559		79392.2	20521862	1 (1 0 0 0 0)
trypsin X3 [Homo sapiens]	0.00949175	10.055		27066.8	48255915	5 (1 0 2 2 0)
histone cluster 1, H1d [Homo sapiens]	0.00132119	10.0532		22336.3	4885377	1 (1 0 0 0 0)
immunoglobulin heavy chain variable region [Homo sapiens]	0.00282588	10.0525		9653.58	19773134	1 (1 0 0 0 0)
CD52 protein [Homo sapiens]	0.00824948	10.0524		2164.29	5578771	1 (1 0 0 0 0)
NCK adaptor protein 1 [Homo sapiens]	0.00161926	10.0519		42837.4	5453754	1 (1 0 0 0 0)
platelet-activating factor receptor [Homo sapiens]	0.00337581	10.0497		39177.6	4506241	1 (1 0 0 0 0)
envelope glycoprotein [Human immunodeficiency virus 2]	0.00414869	10.0486		20755.1	94421171	1 (1 0 0 0 0)
hCG1651398 [Homo sapiens]	0.00149302	10.0485		14505.2	119608945	1 (1 0 0 0 0)
tat protein [Human immunodeficiency virus 1]	0.00996369	10.0478		11604.6	78172858	1 (1 0 0 0 0)
unnamed protein product [Homo sapiens]	0.00134413	10.0456		25766.4	10438837	1 (1 0 0 0 0)
unnamed protein product [Homo sapiens]	0.00942889	10.0446		71235.7	7019973	1 (1 0 0 0 0)
PTK7 protein tyrosine kinase 7 isoform a precursor variant [Homo sapien	0.00539786	10.0434		84311.7	62088280	1 (1 0 0 0 0)
VE2_HPV69 Regulatory protein E2	0.00292933	10.0426		42041.2	76363467	1 (1 0 0 0 0)
envelope glycoprotein [Human immunodeficiency virus type 1]	0.00608753	10.0404		13127.9	8071694	1 (1 0 0 0 0)
akt substrate AS250 [Homo sapiens]	0.00285846	10.0401		210608	83638027	3 (0 0 1 1 1)
AF161361_1 HSPC098 [Homo sapiens]	0.000915509	10.0387		13154	6841136	1 (1 0 0 0 0)
envelope glycoprotein [Human immunodeficiency virus 1]	0.00271105	10.0371		96527.8	63098320	1 (1 0 0 0 0)
TBB4Q_HUMAN Tubulin beta-4q chain	4.66568e-05	8.16756		48403.5	12643363	1 (0 1 0 0 0)
AF470976_1 pol polyprotein [Human immunodeficiency virus type 1]	0.00336753	8.12968		41160.8	21686054	1 (0 1 0 0 0)
hypothetical protein FLJ90166, isoform CRA_b [Homo sapiens]	0.00119793	8.12279		87225.3	119595898	2 (0 2 0 0 0)
unnamed protein product [Homo sapiens]	0.00763087	8.10981		14985.7	34535623	3 (0 2 0 1 0)
ubiquitin fusion degradation 1-like isoform A [Homo sapiens]	0.0093254	8.10124		34478.3	29501813	3 (1 1 0 1 0)
hemoglobin beta chain [Homo sapiens]	1.26875e-06	8.09815		11015.6	66731527	1 (0 1 0 0 0)
keratin [Homo sapiens]	0.000365034	8.09544		51303.3	1200072	5 (2 2 1 0 0)
heterogeneous nuclear ribonucleoprotein K [Mus musculus]	0.00890525	8.09456		50944.4	13384620	1 (0 1 0 0 0)
envelope glycoprotein [Human immunodeficiency virus type 1]	0.0019334	8.09321		22620.2	10303957	2 (1 1 0 0 0)
AF080135_1 envelope glycoprotein; gp120 [Human immunodeficiency virus type	0.00289143	8.09283		8045.19	5456726	3 (0 2 1 0 0)
tubulin, alpha 4 [Mus musculus]	0.000140584	8.09143		49892.4	6678467	2 (1 1 0 0 0)
protease [Human immunodeficiency virus 1]	0.00903014	8.09021		9079.01	22595924	1 (0 1 0 0 0)
DOC10_HUMAN Dedicator of cytokinesis protein 10 (Zizimin-3)	0.000522339	8.08883		249153	32469767	1 (0 1 0 0 0)
Unknown (protein for MGC:51087) [Homo sapiens] [MAS	0.00195958	8.08326		8640.7	71297104	2 (0 1 0 1 0)
hypothetical protein [Homo sapiens]	0.0038886	8.08316		26650.5	51476176	1 (0 1 0 0 0)
unnamed protein product [Homo sapiens]	0.00309995	8.08137		15201.5	34534738	1 (0 1 0 0 0)
SH2 domain protein 2A [Homo sapiens]	0.00191622	8.07689		42880.7	4503633	1 (0 1 0 0 0)
tat protein [Human immunodeficiency virus type 1] [M	0.00238089	8.0722		11425.6	3947930	1 (0 1 0 0 0)
hLAT1-3TM [Homo sapiens]	0.00111204	8.07178		18766.9	21320898	1 (0 1 0 0 0)
hCG2028058 [Homo sapiens]	0.00603992	8.07039		5264.7	119569444	1 (0 1 0 0 0)
hCG1794018 [Homo sapiens]	0.00314289	8.06752		5827.94	119626211	1 (0 1 0 0 0)
envelope glycoprotein [Human immunodeficiency virus type 1]	0.00196547	8.06289		46804.9	2290126	1 (0 1 0 0 0)
fibrinogen gamma chain (partial) (212 AA) [Homo sapiens]	0.000860809	8.06235		24109.2	930064	1 (0 1 0 0 0)
AF121775_1 nasopharyngeal carcinoma susceptibility protein LZ16 [Homo sapi	0.00340434	8.0615		40078.3	6690397	2 (0 1 1 0 0)
actin-like protein [Homo sapiens]	0.00173947	8.06086		11528.9	62421162	1 (0 1 0 0 0)
immediate early 2 [Human herpesvirus 6]	0.00446715	8.06028		184033	19773438	1 (0 1 0 0 0)
P2RX5_HUMAN P2X purinoceptor 5 (ATP receptor) (P2X5) (Purinergic receptor) [M	0.000740603	8.05993		47073.6	12643425	1 (0 1 0 0 0)
gp120 [Human immunodeficiency virus type 1]	0.00545048	8.05968		13168.6	3513841	2 (0 1 0 0 1)
unnamed protein product [Homo sapiens]	0.00676006	8.05755		51975.2	7020033	1 (0 1 0 0 0)
regulator of G-protein signalling 16 [Homo sapiens]	0.00617947	8.05645		22753.2	34452690	1 (0 1 0 0 0)
interleukin 18 receptor 1, isoform CRA_b [Homo sapiens]	0.00611993	8.05498		13727	119622198	2 (0 1 1 0 0)
tau-tubulin kinase [Homo sapiens]	0.0050303	8.05427		182352	27451602	2 (0 0 1 0 1)
TTLL9 protein [Homo sapiens]	0.000320236	8.05399		41504.9	74353582	1 (0 1 0 0 0)
HAND2 protein [Homo sapiens]	0.00152107	8.05268		14933	81673086	1 (0 1 0 0 0)
AF331131_1 envelope glycoprotein [Human immunodeficiency virus type 1] [M	0.00240851	8.05181		15612	15216621	1 (0 1 0 0 0)
UL144 [Human herpesvirus 5]	0.00928483	8.0483		19487.7	81373832	1 (0 1 0 0 0)
hypothetical protein LOC345651 [Homo sapiens]	0.00896929	8.04392		41976	63055057	1 (0 1 0 0 0)
hCG2045959 [Homo sapiens]	0.00163978	8.04227		15702.4	119585296	1 (0 1 0 0 0)
calmodulin-dependent phosphodiesterase [Homo sapiens]	0.00891767	8.04161		61341.6	11995072	1 (0 1 0 0 0)
polyprotein [Human enterovirus 87]	0.00138973	8.03921		244470	61608303	1 (0 1 0 0 0)
S37537 ryanodine receptor type 3 - human (fragment)	0.00152418	8.03067		5393.63	480949	1 (0 1 0 0 0)
tubulin, beta, 2 [Homo sapiens]	3.70789e-07	6.22462		49799	5174735	3 (0 2 1 0 0)
envelope glycoprotein [Human immunodeficiency virus 1]	0.00424307	6.05855		12544.5	110007297	2 (1 0 1 0 0)
envelope glycoprotein [Human immunodeficiency virus 1]	0.00774688	4.05818		10201.3	44978170	2 (1 0 0 1 0)
envelope glycoprotein [Human immunodeficiency virus 1]	0.00287307	4.05462		11578	13661109	3 (0 1 1 1 0)

## Sheet: Control_3_FA
Description	P-value	Score	Coverage	MW	Accession	Peptide (Hits)
2',3'-cyclic-nucleotide 3'-phosphodiesterase (EC 3.1.4.37)	2.49453e-08	246.202		45070.4	180687	45 (35 4 3 1 2)
I38369 beta-tubulin - human (fragment)	2.30367e-07	198.226		48848.5	2119276	55 (44 6 2 2 1)
glial fibrillary acidic protein [Homo sapiens]	1.95113e-08	168.193		49849.7	4503979	26 (22 2 1 1 0)
ferritin, heavy polypeptide 1 [Homo sapiens]	6.50607e-09	120.335		21212.3	56682959	53 (45 5 2 1 0)
tubulin, beta 4 [Homo sapiens]	1.90379e-09	112.235		49553.9	21361322	32 (19 12 0 0 1)
tubulin alpha 6 [Homo sapiens]	6.19452e-07	110.186		49863.5	14389309	38 (30 3 3 1 1)
myelin basic protein isoform 1 [Homo sapiens]	1.86765e-07	94.1939		21480	68509930	30 (22 5 1 2 0)
brain creatine kinase [Homo sapiens]	3.01892e-11	92.2227		42617.4	21536286	18 (17 0 0 0 1)
tubulin, beta, 4 [Homo sapiens]	8.38244e-11	88.2269		50400.3	50592996	17 (13 3 0 0 1)
ferritin, light polypeptide [Homo sapiens]	7.03656e-09	86.2467		20007.1	20149498	32 (24 1 5 1 1)
KIAA0968 protein [Homo sapiens]	4.99198e-08	74.134		58985.2	4589580	9 (7 0 0 2 0)
A Chain A, Crystal Structure Of A DictyosteliumTETRAHYMENA CHIMERA Actin	6.16889e-05	58.1204		41719.9	7245526	7 (5 1 0 0 1)
tubulin, alpha-like 3 [Homo sapiens]	0.000146655	56.1393		49876.8	13376181	13 (11 0 2 0 0)
histone H2B [Homo sapiens]	1.0158e-07	50.2157		13927.6	1568557	13 (13 0 0 0 0)
alpha (2) chain [Homo sapiens]	3.35794e-09	50.1645		46693.9	29551	6 (6 0 0 0 0)
neurofilament, medium polypeptide 150kDa [Homo sapiens]	5.60582e-07	46.158		102386	4885513	6 (4 0 0 1 1)
tubulin, beta 2 [Homo sapiens]	5.23134e-05	46.1411		49875	4507729	8 (7 0 1 0 0)
voltage-dependent anion channel 1 [Homo sapiens]	6.85941e-05	42.1234		30753.6	4507879	6 (5 0 0 0 1)
calcium/calmodulin-dependent protein kinase IIB isoform 8 [Homo sapien	0.000167693	42.1113		50923	26051218	9 (5 0 1 1 2)
tubulin, alpha 1B [Mus musculus]	1.31825e-07	40.2072		50119.6	34740335	12 (12 0 0 0 0)
dihydropyrimidinase-like 2 [Homo sapiens]	1.41912e-07	40.1774		62254.7	4503377	5 (4 1 0 0 0)
H4 histone family, member A [Homo sapiens]	2.17231e-07	40.1631		11360.4	4504301	9 (9 0 0 0 0)
neurofilament, light polypeptide 68kDa [Homo sapiens]	1.44004e-05	40.1225		61479.3	105990539	9 (8 1 0 0 0)
brain abundant, membrane attached signal protein 1 [Homo sapiens]	0.000518336	40.0847		22680	30795231	4 (4 0 0 0 0)
unnamed protein product [Homo sapiens]	0.000741364	40.0817		100614	30076	5 (3 1 0 0 1)
syntaxin binding protein 1 isoform a [Homo sapiens]	2.23028e-05	38.1305		68692.3	4507297	4 (3 1 0 0 0)
KIAA1249 protein [Homo sapiens]	0.00840747	36.1005		105068	6330854	5 (3 0 2 0 0)
A Chain A, The 1.9-A Crystal Structure Of The Noncollagenous (Nc1) Domain Of H	7.29253e-09	34.1689		25314	21466080	5 (4 0 0 1 0)
eukaryotic translation elongation factor 1 alpha 1 [Homo sapiens]	0.000176409	34.0996		50109.2	4503471	6 (3 2 0 1 0)
ANK2_HUMAN Ankyrin-2 (Brain ankyrin) (Ankyrin-B) (Ankyrin, nonerythroid)	5.97853e-08	32.2415		430079	1703310	5 (2 0 1 1 1)
tubulin, beta, 2 [Homo sapiens]	9.66359e-09	30.1812		49799	5174735	8 (6 1 1 0 0)
ATP synthase, H+ transporting, mitochondrial F1 complex, alpha subunit	7.37183e-05	30.1301		59713.7	4757810	5 (5 0 0 0 0)
H1 histone family, member 0 [Homo sapiens]	1.9872e-05	30.1194		20850.2	4885371	3 (3 0 0 0 0)
histone cluster 1, H1d [Homo sapiens]	1.7378e-06	30.1117		22336.3	4885377	5 (5 0 0 0 0)
H2A histone family, member Z [Homo sapiens]	0.000217361	30.1023		13544.5	4504255	3 (3 0 0 0 0)
COL1A1 and PDGFB fusion transcript [Homo sapiens] [M	0.000347084	30.0928		36963.2	3288487	4 (4 0 0 0 0)
KRHU2 keratin 1, type II, cytoskeletal - human	0.0048962	30.0826		65454.4	7428712	4 (2 1 0 0 1)
unnamed protein product [Homo sapiens]	9.66359e-09	28.168		49811	10433717	10 (3 1 5 1 0)
B46091 H+-exporting ATPase (EC 3.6.3.6) chain A, vacuolar (VA68 type) - human	0.00088027	28.0933		68204.5	1082432	3 (2 1 0 0 0)
ubiquitin specific protease 29 [Homo sapiens]	0.00278438	28.0743		104090	10190742	4 (1 1 1 1 0)
alanyl-tRNA synthetase domain containing 1 [Homo sapiens]	0.00594472	26.1245		58715.9	13376886	3 (2 0 1 0 0)
zinc finger protein 445 [Homo sapiens]	0.00134884	26.0632		118887	31340735	8 (0 2 1 2 3)
PGBM_HUMAN Basement membrane-specific heparan sulfate proteoglycan core prote	0.000114283	26.0613		468528	24212664	5 (1 1 0 1 2)
alpha3b subunit of laminin 5 [Homo sapiens]	0.00111726	24.0916		147912	1149515	46 (10 6 15 11 4)
IWS1_HUMAN IWS1 homolog (IWS1-like protein)	0.00860891	24.0498		91899.1	85542184	5 (1 0 1 1 2)
histone H2A [Homo sapiens]	1.30439e-07	22.2481		13986.8	28195394	6 (4 0 1 0 1)
AF184522_1 gag protein [Human immunodeficiency virus type 1]	0.00576049	22.0804		27393.6	6815704	4 (2 1 0 1 0)
envelope glycoprotein [Human immunodeficiency virus 2]	0.00209251	22.0655		92274.8	37727235	3 (1 0 2 0 0)
RYR2_HUMAN Ryanodine receptor 2 (Cardiac muscle-type ryanodine receptor) (RyR	0.00808471	22.0514		564136	17380312	3 (2 0 0 0 1)
hypothetical protein ( (L11645) alpha-tubulin [Homo sapiens] ) [Neuros	9.04536e-10	20.2158		10326.7	85091443	3 (2 1 0 0 0)
S68466 translation elongation factor EF-Tu-like protein P43 precursor, mitochondria	6.23244e-09	20.1959		49502.2	7443384	2 (2 0 0 0 0)
PDZ domain containing RING finger 3 [Homo sapiens]	0.001467	20.1454		119521	57529737	4 (3 0 0 0 1)
VPS39_HUMAN Vam6/Vps39-like protein (hVam6p)	0.00759995	20.1275		101744	66774218	3 (2 0 0 0 1)
glyceraldehyde-3-phosphate dehydrogenase [Homo sapiens]	8.63408e-06	20.1185		36030.4	7669492	2 (2 0 0 0 0)
KIAA1708 [Homo sapiens]	4.90324e-05	20.1086		185022	30725047	3 (2 1 0 0 0)
BTBD9_HUMAN BTB/POZ domain-containing protein 9	0.00159974	20.0972		69143.3	34395545	2 (2 0 0 0 0)
N Chain N, Mutant Monomer Of Recombinant Human Hexokinase Type I Complexed With	0.00046895	20.0842		102383	7245424	2 (2 0 0 0 0)
hypothetical protein LOC169436 [Homo sapiens]	0.00360209	20.0808		75627.2	76563908	2 (2 0 0 0 0)
KIAA0956 protein [Homo sapiens]	0.000269511	20.0585		76311.4	4589556	2 (2 0 0 0 0)
coiled-coil domain containing 52 [Homo sapiens]	0.00707651	20.0481		96205.5	21389501	3 (0 2 0 1 0)
unnamed protein product [Homo sapiens]	0.00312166	20.0434		54221.2	22760572	2 (2 0 0 0 0)
hypothetical protein [Homo sapiens]	0.00405984	18.1332		141516	30348693	3 (0 1 1 1 0)
microtubule-associated protein 2 [Homo sapiens]	0.00012174	18.1176		199045	1850617	4 (2 0 1 0 1)
ACLY variant protein [Homo sapiens]	0.00380667	18.0877		124477	68533125	3 (1 1 0 1 0)
solute carrier family 25 (mitochondrial carrier; oxoglutarate carrier)	0.000141964	18.0829		34039.8	21361114	5 (2 3 0 0 0)
arginine vasopressin receptor 1B [Homo sapiens]	0.00537424	18.0824		46940.5	4502333	2 (1 1 0 0 0)
TBB4Q_HUMAN Tubulin beta-4q chain	5.6806e-05	18.0811		48403.5	12643363	2 (1 1 0 0 0)
dachsous 2 isoform 1 [Homo sapiens]	0.00617321	18.0781		322032	47059046	2 (1 1 0 0 0)
unnamed protein product [Homo sapiens]	0.000907927	18.076		86940.1	10438291	6 (2 1 2 0 1)
unnamed protein product [Homo sapiens]	0.00605674	18.0651		13577.8	21754996	2 (1 1 0 0 0)
AF-6 [Homo sapiens]	0.000526355	18.0638		181786	3452574	3 (0 2 0 0 1)
CLLL8 protein [Homo sapiens]	0.00899099	18.0563		81802.3	13994282	2 (1 1 0 0 0)
ZAN_HUMAN Zonadhesin precursor	0.00149135	18.056		305373	27924006	2 (1 1 0 0 0)
vesicle transport-related protein isoform a [Homo sapiens]	0.00832719	18.0508		72334.1	33469966	2 (1 1 0 0 0)
zinc finger protein 484 isoform a [Homo sapiens]	0.00812113	18.0503		98157.8	55741876	2 (1 1 0 0 0)
unnamed protein product [Homo sapiens]	0.00335561	16.1477		55559.6	10438086	2 (0 2 0 0 0)
XIAP associated factor-1 (ZAP-1) [Homo sapiens] [MA	0.00474144	16.1123		36890.9	1869901	3 (1 1 1 0 0)
SI:dZ75P05.1 (novel protein similar to human spindle pole body protein	0.00444743	16.0935		72474.2	27817298	2 (0 2 0 0 0)
hypothetical protein HhV6Bgp064 [Human herpesvirus 6B]	0.0075872	16.0935		88651.5	9633129	2 (0 2 0 0 0)
envelope glycoprotein [Human immunodeficiency virus 1]	0.00489835	16.088		97479.3	51950717	2 (1 0 1 0 0)
A Chain A, Crystal Structure Of Dictyostelium Discoideum Actin Complexed With	3.65254e-07	16.0813		41574.7	28374049	2 (1 0 1 0 0)
A Chain A, Crystal Structure Of Human Calcineurin Complexed With Cyclosporin A	0.0057417	16.0683		42696.1	24987750	2 (0 2 0 0 0)
outer capsid protein; VP7 [human rotavirus DG8] [MAS	0.000491385	16.0612		37278.6	2665678	2 (1 0 1 0 0)
adaptor protein complex AP-2, mu1 [Mus musculus]	1.79763e-08	14.1593		49623.1	6753074	2 (1 0 0 1 0)
hypothetical protein LOC286077 [Homo sapiens] [MA	0.00378407	14.0944		127023	87080811	2 (1 0 0 1 0)
DP13B_HUMAN DCC-interacting protein 13 beta (Dip13 beta) (Adapter protein con	0.00611595	14.0878		74474.4	61212997	2 (0 1 1 0 0)
KIAA1288 protein [Homo sapiens]	0.00490731	14.0828		138447	6331407	5 (0 3 1 0 1)
FP17780 [Homo sapiens]	0.00672813	14.0799		15098.9	37782408	2 (1 0 0 1 0)
neuronal pentraxin II [Homo sapiens]	0.00351859	14.0773		47012.2	28195384	3 (1 0 1 1 0)
SRC8_HUMAN Src substrate cortactin (Amplaxin) (Oncogene EMS1)	0.00276695	14.0688		61598.6	2498954	2 (1 0 0 1 0)
golgi SNAP receptor complex member 1 isoform 1 [Homo sapiens]	0.00151719	14.0637		28594.6	4758456	2 (0 1 1 0 0)
AF265439_1 DC37 [Homo sapiens]	0.0061505	14.0562		32242.5	12005982	46 (5 5 12 13 11)
truncated protease [Human immunodeficiency virus 2]	0.0048754	14.0513		19342	73765393	2 (1 0 0 1 0)
acyl-CoA synthetase medium-chain family member 2B [Homo sapiens]	0.00909633	14.0454		64216	52138580	2 (0 1 1 0 0)
coiled-coil domain containing 138 [Homo sapiens]	0.00375907	14.0441		76170.9	21450665	2 (1 0 0 1 0)
BRCA1 protein [Homo sapiens]	0.00196332	12.1449		150217	92096024	5 (0 2 2 1 0)
KIAA0338 [Homo sapiens]	4.94666e-07	12.1138		103516	2224617	2 (1 0 0 0 1)
SC24C_HUMAN Protein transport protein Sec24C (SEC24-related protein C)	0.000628201	12.1095		118239	27735256	2 (1 0 0 0 1)
CENPF_HUMAN Centromere protein F (Kinetochore protein CENP-F) (Mitosin) (AH an	0.00532254	12.1036		367366	1345731	3 (0 0 2 0 1)
Rho-associated, coiled-coil containing protein kinase 1 [Homo sapiens]	0.000766094	12.0972		158075	4885583	2 (1 0 0 0 1)
SEC63-like protein [Homo sapiens]	0.00248777	12.0908		87941.5	6005872	3 (0 2 0 1 0)
VDAC2 [Homo sapiens]	0.000915043	12.0857		30393	48146045	2 (0 0 2 0 0)
keratin 10 [Homo sapiens]	5.6719e-06	12.0819		58791.5	40354192	2 (1 0 0 0 1)
ubiquitin fusion degradation 1-like isoform A [Homo sapiens]	0.000494028	12.0812		34478.3	29501813	2 (1 0 0 0 1)
ribosomal protein L23 [Homo sapiens]	0.000147459	12.0784		14856.1	4506605	2 (1 0 0 0 1)
D38992 cadherin 8 - human	0.00507515	12.0666		87516.3	2119626	2 (0 1 0 1 0)
immunoglobulin lambda light chain [Homo sapiens] [MA	0.00665902	12.0663		10643.3	4566097	2 (0 1 0 1 0)
FLJ00150 protein [Homo sapiens]	0.00413064	12.0649		207284	18676506	2 (0 0 2 0 0)
hCG2041581 [Homo sapiens]	0.00429363	12.0577		154726	119597090	2 (0 0 2 0 0)
KIAA1939 protein [Homo sapiens]	0.00566042	12.0469		122909	18916718	2 (1 0 0 0 1)
cadherin 4, type 1 preproprotein [Homo sapiens]	0.00148763	10.1763		100218	14589893	2 (1 1 0 0 0)
H2A histone family, member O [Homo sapiens]	0.000109477	10.1714		14086.9	4504251	1 (1 0 0 0 0)
protein kinase C, alpha [Homo sapiens]	1.36184e-05	10.1385		76714.2	4506067	1 (1 0 0 0 0)
histone cluster 1, H1a [Homo sapiens]	0.000164899	10.1323		21828.9	4885373	3 (3 0 0 0 0)
hypothetical protein LOC645369 [Homo sapiens]	0.00299267	10.1312		63888.9	122692281	2 (2 0 0 0 0)
solute carrier family 25, member 5 [Homo sapiens]	8.46804e-06	10.1287		32874.2	4502099	1 (1 0 0 0 0)
unnamed protein product [Homo sapiens]	0.00260308	10.1262		19196.9	10435210	1 (1 0 0 0 0)
envelope glycoprotein [Human immunodeficiency virus 1]	0.00754606	10.1231		24688.5	27948736	1 (1 0 0 0 0)
human HnRNP A1 homolog family member (hrp-2) [Caenorhabditis elegans]	0.00311817	10.1149		65878.7	71987750	2 (0 1 0 0 1)
tubulin, beta 5 [Mus musculus]	0.00213087	10.1145		49639	7106439	1 (1 0 0 0 0)
75 kDa subunit NADH dehydrogenase precursor [Homo sapiens]	0.00304536	10.1142		79522.6	38079	1 (1 0 0 0 0)
retinitis pigmentosa 1-like protein 1 [Homo sapiens]	0.00811745	10.1124		259278	28301672	6 (2 3 1 0 0)
tyrosine 3-monooxygenase/tryptophan 5-monooxygenase activation protein,	2.23034e-05	10.1119		28064.8	4507949	1 (1 0 0 0 0)
fer-1-like 4 (C. elegans) [Homo sapiens]	0.0037349	10.1097		37766.9	56203423	1 (1 0 0 0 0)
LAMC1_HUMAN Laminin subunit gamma-1 precursor (Laminin B2 chain)	0.000201932	10.1055		177492	126369	1 (1 0 0 0 0)
sine oculis homeobox homolog 6 [Homo sapiens]	0.00320746	10.1047		27647.3	6677979	7 (3 0 0 2 2)
UFHUM fumarate hydratase (EC 4.2.1.2) precursor, mitochondrial - human (fragment)	0.00855258	10.1045		50352.8	68293	4 (4 0 0 0 0)
gp120 protein [Human immunodeficiency virus 1] [MA	0.0091017	10.1031		23334.8	34786616	2 (1 0 0 0 1)
calcium/calmodulin-dependent protein kinase IIB isoform 2 [Homo sapien	0.00281387	10.0988		60348.7	26051206	1 (1 0 0 0 0)
zinc finger protein 106 homolog [Homo sapiens]	0.00224985	10.0982		208753	11968023	1 (1 0 0 0 0)
KIAA0533 protein [Homo sapiens]	3.20933e-05	10.0976		178103	3043590	1 (1 0 0 0 0)
novel protein [Homo sapiens]	0.00374202	10.0973		49281.8	123231680	1 (1 0 0 0 0)
tegument protein VP22 [Human herpesvirus 1]	0.00298475	10.0966		32231.4	89941445	1 (1 0 0 0 0)
calcium/calmodulin-dependent protein kinase II gamma isoform 1 [Mus mu	0.00248615	10.0965		59569.4	75991700	1 (1 0 0 0 0)
envelope glycoprotein [Human immunodeficiency virus type 1]	0.00890106	10.0943		22620.2	10303957	3 (1 1 0 0 1)
unnamed protein product [Homo sapiens]	0.000776101	10.0938		63987.6	7020785	1 (1 0 0 0 0)
DEAH (Asp-Glu-Ala-His) box polypeptide 40, isoform CRA_e [Homo sapiens]	0.00330549	10.0933		50220	119614812	1 (1 0 0 0 0)
tyrosine 3/tryptophan 5 -monooxygenase activation protein, zeta polypep	0.000175763	10.0928		27727.7	4507953	1 (1 0 0 0 0)
hCG2045221 [Homo sapiens]	0.000133063	10.0919		7252.74	119588117	13 (5 3 3 1 1)
major capsid protein [Human papillomavirus]	0.0024003	10.0912		17199.4	41059954	1 (1 0 0 0 0)
phosphofructokinase, platelet [Homo sapiens]	4.31308e-06	10.0902		85541.6	11321601	1 (1 0 0 0 0)
COL1A1 and PDGFB fusion transcript [Homo sapiens] [	0.00845422	10.089		9556.6	1888411	1 (1 0 0 0 0)
vacuolar H+ATPase B2 [Homo sapiens]	3.76162e-05	10.089		56465	19913428	1 (1 0 0 0 0)
E1A binding protein p400, isoform CRA_a [Homo sapiens]	0.00994768	10.0888		334553	119618940	1 (1 0 0 0 0)
lipin 3 [Homo sapiens]	0.000845672	10.0881		93556.5	74271888	3 (0 0 1 2 0)
H2A histone family, member A [Homo sapiens]	0.000265201	10.0878		14127	10645195	2 (2 0 0 0 0)
EF-hand domain family, member A2, isoform CRA_b [Homo sapiens]	0.00339814	10.087		61557.9	119584231	1 (1 0 0 0 0)
unnamed protein product [Homo sapiens]	0.000159576	10.0867		69301.8	30023	1 (1 0 0 0 0)
GK006 [Homo sapiens]	0.00339014	10.0851		30416.4	18031730	1 (1 0 0 0 0)
NADH-ubiquinone oxidoreductase NDUFS2 subunit [Homo sapiens]	0.00719283	10.0846		4410.15	10179600	1 (1 0 0 0 0)
microcephalin [Homo sapiens]	0.000220925	10.0845		41929.5	46325249	1 (1 0 0 0 0)
hCG1985469, isoform CRA_a [Homo sapiens]	0.00393914	10.0844		40980.3	119610702	2 (0 0 1 1 0)
protein kinase C, theta [Homo sapiens]	0.00142566	10.084		81810.8	5453976	2 (0 0 1 1 0)
KIAA1363 protein [Homo sapiens]	0.00107484	10.0831		48042	7243107	1 (1 0 0 0 0)
MAS1 oncogene-like [Homo sapiens]	0.00725985	10.083		42382.2	16418463	1 (1 0 0 0 0)
fms-related tyrosine kinase 1 (vascular endothelial growth factor/vascu	0.00606134	10.0817		150638	4503749	1 (1 0 0 0 0)
solute carrier family 25 (mitochondrial carrier; adenine nucleotide tr	0.00020982	10.0812		33043.2	55749577	1 (1 0 0 0 0)
envelope glycoprotein [Human immunodeficiency virus 1]	0.00449013	10.0807		52120.8	61102527	3 (1 0 1 0 1)
ribosomal protein L4 [Homo sapiens]	0.000285069	10.08		47667.5	16579885	1 (1 0 0 0 0)
envelope glycoprotein [Human immunodeficiency virus 1]	0.000180839	10.0798		97025.9	58374202	2 (1 0 1 0 0)
chordin-like 2, isoform CRA_a [Homo sapiens]	0.00748463	10.0795		11657.7	119595350	1 (1 0 0 0 0)
KIAA0763 protein [Homo sapiens]	0.00178286	10.0791		95083	40788355	1 (1 0 0 0 0)
tyrosine 3/tryptophan 5 -monooxygenase activation protein, epsilon poly	0.0078014	10.0785		29155.4	5803225	1 (1 0 0 0 0)
immunoglobulin lambda light chain variable region [Homo sapiens]	0.00120296	10.0771		11625.6	76252665	3 (2 0 1 0 0)
envelope glycoprotein [Human immunodeficiency virus 1]	0.00803931	10.0764		12925.5	30143558	1 (1 0 0 0 0)
immunoglobulin heavy chain variable region [Homo sapiens]	0.00981086	10.0756		10722.2	112696611	1 (1 0 0 0 0)
polyprotein [Human immunodeficiency virus type 1] [M	0.00612544	10.0756		27031.1	4754517	1 (1 0 0 0 0)
A Chain A, Crystal Structure Of Human Glutathione-S-Transferase P1-1 Cys-Free	0.000295584	10.0748		23114.1	119390455	1 (1 0 0 0 0)
envelope glycoprotein [Human immunodeficiency virus 1]	0.000570836	10.0738		11836.7	110007289	1 (1 0 0 0 0)
unnamed protein product [Homo sapiens]	0.00902777	10.0738		20697	10440168	2 (1 1 0 0 0)
thiopurine methyltransferase	0.000709458	10.0727		28379.7	805082	1 (1 0 0 0 0)
Chain , The Alzheimer`s Disease Amyloid A4 Peptide (Residues 1-40)	0.000736753	10.0724		4327.15	1310912	1 (1 0 0 0 0)
KIAA0041 [Homo sapiens]	0.00325877	10.0718		88243.3	27529706	1 (1 0 0 0 0)
heterogeneous nuclear ribonucleoprotein K [Mus musculus]	0.00117567	10.0711		50944.4	13384620	1 (1 0 0 0 0)
outer dense fiber protein 2/2 [Homo sapiens]	0.00670607	10.0708		70660.4	2996006	2 (1 1 0 0 0)
KIAA0622 protein [Homo sapiens]	0.000924603	10.0699		141517	3327058	1 (1 0 0 0 0)
RNA-binding protein S1, serine-rich domain [Homo sapiens]	0.00143802	10.0697		34187.7	6857826	1 (1 0 0 0 0)
novel protein, ortholog of human EBP50-PDZ interactor EPI64 [Mus muscul	0.00344425	10.0697		59158.4	56206490	1 (1 0 0 0 0)
hypothetical protein DDBDRAFT_0169222 [Dictyostelium discoideum AX4]	0.000197803	10.0692		96209.4	66817532	1 (1 0 0 0 0)
KIAA0866 protein [Homo sapiens]	0.00530287	10.0683		228580	27529744	1 (1 0 0 0 0)
vacuolar protein sorting 28 isoform 1 [Homo sapiens]	0.00163355	10.068		25408.7	7705885	2 (1 0 0 1 0)
envelope glycoprotein [Human immunodeficiency virus 1]	0.00667158	10.0678		11032.5	29838336	1 (1 0 0 0 0)
human immunodeficiency virus type I enhancer binding protein 2 [Mus mu	0.00552398	10.0666		266535	85861241	2 (2 0 0 0 0)
immunoglobulin heavy chain variable region [Homo sapiens]	0.00483394	10.0664		11945.8	66821083	1 (1 0 0 0 0)
neuraminidase precursor [Homo sapiens]	0.0039429	10.0663		45438.7	4557791	1 (1 0 0 0 0)
UL59_HCMVA Hypothetical protein UL59	0.00271473	10.0656		13935.8	136954	1 (1 0 0 0 0)
p21 (CDKN1A)-activated kinase 3 [Homo sapiens]	0.00962038	10.0647		20138.1	57209045	1 (1 0 0 0 0)
CXorf30 [Homo sapiens]	0.000776815	10.0641		47581.8	149588556	1 (1 0 0 0 0)
unnamed protein product [Homo sapiens]	0.00290021	10.0632		17554.1	21754909	1 (1 0 0 0 0)
KITH_VZVG Thymidine kinase	0.00699221	10.0625		37846.4	118821	1 (1 0 0 0 0)
B Chain B, Crystal Structure Of Fibrinogen Fragment D	0.00112534	10.0618		37624.7	2781208	1 (1 0 0 0 0)
autoantigen La [Homo sapiens]	0.00715662	10.0611		46808.2	10835067	1 (1 0 0 0 0)
envelope glycoprotein [Human immunodeficiency virus type 1]	0.00840973	10.0611		10655.6	11992460	1 (1 0 0 0 0)
enoyl-Coenzyme A, hydratase/3-hydroxyacyl Coenzyme A dehydrogenase [Ho	0.00749872	10.059		79444.9	68989263	1 (1 0 0 0 0)
envelope glycoprotein [Human immunodeficiency virus 1]	0.00565783	10.0575		39177.8	61741772	1 (1 0 0 0 0)
R Chain R, Twinning In Crystals Of Human Skeletal Muscle D- Glyceraldehyde-3-Pho	0.00387559	10.0573		35853.3	230867	1 (1 0 0 0 0)
complement component 5 receptor 1 (C5a ligand) [Homo sapiens]	0.00250336	10.0563		39295	4502509	1 (1 0 0 0 0)
pol protein [Human immunodeficiency virus 1]	0.00498821	10.056		57037.5	42717482	1 (1 0 0 0 0)
COL4A2 protein [Homo sapiens]	0.000172831	10.0559		37660.2	51874061	1 (1 0 0 0 0)
Ig heavy chain variable region [Homo sapiens]	0.0011931	10.0552		7875.1	2809025	1 (1 0 0 0 0)
early endosome antigen 1, 162kD [Homo sapiens]	0.0019281	10.0542		162366	55770888	1 (1 0 0 0 0)
immunoglobulin heavy chain variable region [Homo sapiens]	0.00827091	10.054		10882.4	112699296	1 (1 0 0 0 0)
unnamed protein product [Homo sapiens]	0.00861399	10.0533		23597.5	10436323	1 (1 0 0 0 0)
hCG2045758 [Homo sapiens]	0.00695446	10.052		6073.18	119626212	1 (1 0 0 0 0)
kinesin family member 11 [Homo sapiens]	0.00680328	10.0517		119085	13699824	1 (1 0 0 0 0)
aminolevulinate, delta, synthase 1 [Homo sapiens]	0.0082464	10.0512		70535.7	4502025	2 (0 0 1 1 0)
asparaginyl-tRNA synthetase [Homo sapiens]	0.00652816	10.0511		62902.6	4758762	1 (1 0 0 0 0)
ICAM5_HUMAN Intercellular adhesion molecule 5 precursor (ICAM-5) (Telencephal	0.00209136	10.0496		97270.1	18203508	1 (1 0 0 0 0)
histidyl-tRNA synthetase 2 precursor [Homo sapiens]	0.0050988	10.0496		56851.8	15029520	1 (1 0 0 0 0)
hypothetical protein [Homo sapiens]	0.00932906	10.0495		102697	21739643	2 (0 1 0 0 1)
solute carrier family 26 (sulfate transporter), member 1, isoform CRA_a	0.00734873	10.0482		74995.7	119603034	1 (1 0 0 0 0)
unnamed protein product [Homo sapiens]	0.000138203	10.0469		46043.7	16554137	1 (1 0 0 0 0)
MCTP2 protein [Homo sapiens]	0.000957973	10.0463		93101.8	124297945	1 (1 0 0 0 0)
hCG2040092 [Homo sapiens]	0.000229254	10.0432		15635.3	119610488	2 (1 1 0 0 0)
CDC28 protein kinase 2 [Homo sapiens]	0.00157027	10.042		9853.98	4502859	1 (1 0 0 0 0)
polyprotein [Human rhinovirus 12]	0.00126142	10.0411		46457.9	39655063	1 (1 0 0 0 0)
hCG2022586, isoform CRA_a [Homo sapiens]	0.00275061	10.0396		45767.8	119599703	1 (1 0 0 0 0)
Ellis van Creveld syndrome protein [Homo sapiens]	0.00344607	10.039		111920	24497531	1 (1 0 0 0 0)
DMPK_HUMAN Myotonin-protein kinase (Myotonic dystrophy protein kinase) (MDPK)	0.00606031	10.0345		70312.7	1706450	1 (1 0 0 0 0)
vif protein [Human immunodeficiency virus 1]	0.00537107	10.0342		22616.9	114149120	1 (1 0 0 0 0)
S-phase kinase-associated protein 1A isoform b [Homo sapiens]	0.00903048	8.15231		18646.2	25777713	3 (0 1 1 0 1)
CE152_HUMAN Centrosomal protein of 152 kDa (Cep152 protein)	4.20784e-05	8.14269		147252	62286590	1 (0 1 0 0 0)
programmed cell death 10 [Homo sapiens]	0.00838771	8.13689		24685.8	20127517	4 (0 2 1 1 0)
A Chain A, The Yeast Actin Val 159 Asn Mutant Complex With Human Gelsolin Segme	0.00211044	8.12161		41677.8	7546413	1 (0 1 0 0 0)
WMBEHQ UL5 protein - human herpesvirus 2 (strain HG52) (fragment)	0.00142491	8.11472		88093.8	74001	4 (0 4 0 0 0)
HELZ_HUMAN Probable helicase with zinc-finger domain [MAS	0.00959505	8.11229		218832	1177024	5 (0 4 1 0 0)
envelope glycoprotein [Human immunodeficiency virus 1]	0.00137302	8.10076		14777.7	50981511	2 (0 1 1 0 0)
envelope glycoprotein [Human immunodeficiency virus 1]	0.00790841	8.09605		12560.8	87246677	2 (0 1 1 0 0)
immunoglobulin alpha heavy chain variable region [Homo sapiens]	0.00206226	8.09154		14011.9	62871218	5 (1 2 1 1 0)
unnamed protein product [Homo sapiens]	0.00289131	8.08831		13132	16553645	1 (0 1 0 0 0)
postreplication repair protein hRAD18p [Homo sapiens]	0.00991239	8.08759		56159.3	14550405	1 (0 1 0 0 0)
calcium binding protein 39 [Homo sapiens]	0.000480063	8.08628		39843.8	7706481	2 (0 0 1 0 1)
unnamed protein product [Homo sapiens]	0.00120515	8.08341		42228.2	7022606	2 (0 2 0 0 0)
activating signal cointegrator 1 complex subunit 2, isoform CRA_e [Homo	0.00925469	8.08281		77122.7	119580252	1 (0 1 0 0 0)
keratin [Homo sapiens]	0.00331823	8.0826		51303.3	1200072	1 (0 1 0 0 0)
envelope glycoprotein [Human immunodeficiency virus type 1]	0.00143968	8.08184		9935.18	11177738	1 (0 1 0 0 0)
sirtuin 1 [Homo sapiens]	0.00671922	8.08049		81630	7657575	1 (0 1 0 0 0)
capsid protein [Human calicivirus HU/NLV/Bham132/95/UK]	0.00303703	8.08045		59925.2	7649413	1 (0 1 0 0 0)
protease [Human immunodeficiency virus 1]	0.00280304	8.07992		10837	120432599	4 (2 1 1 0 0)
AF262176_1 immunoglobulin heavy chain variable region [Homo sapiens]	0.0043604	8.07949		14420.1	8810070	2 (0 2 0 0 0)
envelope glycoprotein [Human immunodeficiency virus 1]	0.00957672	8.07944		19613.9	125395525	1 (0 1 0 0 0)
polyprotein [Human enterovirus B]	0.00901801	8.0792		7487.59	74179360	2 (0 1 0 0 1)
envelope glycoprotein [Human immunodeficiency virus 1]	0.0056846	8.07825		97586.1	86560181	1 (0 1 0 0 0)
palmitoyl-protein thioesterase 1 (ceroid-lipofuscinosis, neuronal 1, in	3.41844e-05	8.07658		34171.3	4506031	1 (0 1 0 0 0)
hypothetical protein LOC563800 [Danio rerio]	0.00453049	8.07651		120422	113682093	1 (0 1 0 0 0)
protein IVa2 [Human adenovirus B]	0.00723167	8.07639		50843.8	31540437	1 (0 1 0 0 0)
hypothetical protein LOC84886 [Homo sapiens]	0.00563592	8.07566		36324.1	14249478	1 (0 1 0 0 0)
hypothetical protein LOC138162 isoform 1 [Homo sapiens]	0.00565308	8.07563		15250.3	115430217	1 (0 1 0 0 0)
KIAA0713 protein [Homo sapiens]	0.00419007	8.07463		108208	3882147	1 (0 1 0 0 0)
AF343037_1 UL37 immediate-early glycoprotein [human herpesvirus 5]	0.00291456	8.07249		35733.9	14794747	1 (0 1 0 0 0)
putative p150 [Homo sapiens]	0.00980586	8.07222		149107	2072951	3 (0 1 2 0 0)
XPO4 protein [Homo sapiens]	0.000269952	8.06839		93766.6	30047795	1 (0 1 0 0 0)
envelope glycoprotein [Human immunodeficiency virus 1]	0.00667158	8.06785		13440.2	29838192	1 (0 1 0 0 0)
tubulin, alpha 4 [Mus musculus]	0.000286117	8.06722		49892.4	6678467	1 (0 1 0 0 0)
immunoglobulin heavy chain variable region [Homo sapiens]	6.08278e-06	8.06685		13142.5	4837839	1 (0 1 0 0 0)
bolA-like 1 [Homo sapiens]	0.00576683	8.06625		14280.5	7705638	1 (0 1 0 0 0)
BCL2-associated athanogene 2 [Homo sapiens]	0.00299757	8.06551		23757.2	4757834	1 (0 1 0 0 0)
hypothetical protein [Homo sapiens]	0.00951096	8.06474		109499	31873374	1 (0 1 0 0 0)
KIAA2018 protein [Homo sapiens]	0.00505875	8.06236		181327	24899200	1 (0 1 0 0 0)
fls485 [Homo sapiens]	0.000508772	8.0622		39819	7705708	1 (0 1 0 0 0)
reverse transcriptase [Human immunodeficiency virus 1]	0.0092069	8.06001		22667.8	40888447	1 (0 1 0 0 0)
nef protein [Human immunodeficiency virus 1]	0.000199692	8.05922		23458.6	56608924	1 (0 1 0 0 0)
A Chain A, Human 11-Beta-Hydroxysteroid Dehydrogenase (Hsd1) With Nadp And Ad	0.00950214	8.05833		28986.9	126030789	1 (0 1 0 0 0)
EIF4G1 variant protein [Homo sapiens]	0.00591046	8.05708		178044	68533081	1 (0 1 0 0 0)
PIN2-interacting protein 1 [Homo sapiens]	0.00298308	8.05615		37012	148747556	1 (0 1 0 0 0)
pol protein [Human immunodeficiency virus 1]	0.00498821	8.056		47089.2	73810315	1 (0 1 0 0 0)
envelope glycoprotein [Human immunodeficiency virus type 1]	0.00105599	8.05518		22853.6	14210325	1 (0 1 0 0 0)
JG0190 XPA protein - human	0.00594001	8.05423		31362.8	7444282	1 (0 1 0 0 0)
gp120 [Human immunodeficiency virus 1]	0.000819521	8.05379		18464.3	15865368	1 (0 1 0 0 0)
envelope glycoprotein [Human immunodeficiency virus 1]	0.00920941	8.05317		55992.6	89277310	1 (0 1 0 0 0)
translocase of outer mitochondrial membrane 40 homolog (yeast), isoform	0.00696658	8.05107		34909.4	119577705	2 (0 1 0 0 1)
testis specific, 13 [Homo sapiens]	0.00486924	8.04821		31757.7	16418411	1 (0 1 0 0 0)
keratin 20 [Homo sapiens]	0.0072874	8.04805		48457	27894337	1 (0 1 0 0 0)
unnamed protein product [Homo sapiens]	0.00294191	8.04667		72215.9	825646	1 (0 1 0 0 0)
P [Human respiratory syncytial virus]	0.0093879	8.04584		26975.3	9629202	1 (0 1 0 0 0)
gag protein [Human immunodeficiency virus 1]	0.00430002	8.04567		14529.3	80974862	1 (0 1 0 0 0)
steroid 5 alpha-reductase 2-like 2 [Homo sapiens]	0.00540756	8.04546		41981.7	58332438	1 (0 1 0 0 0)
hCG20597, isoform CRA_b [Homo sapiens]	0.000653455	8.04213		10045.1	119612465	1 (0 1 0 0 0)
CDC28 protein kinase 1B [Homo sapiens]	0.000842634	8.04198		9653.94	4502857	2 (0 1 0 0 1)
T-cell receptor beta chain variable region [Homo sapiens]	0.0081481	8.04119		1747.73	453045	1 (0 1 0 0 0)
nef protein [Human immunodeficiency virus 1]	0.00876572	8.04023		23757.6	38892662	1 (0 1 0 0 0)
AF289613_1 unknown [Homo sapiens]	0.00315603	8.03801		35546.1	18027430	1 (0 1 0 0 0)
4F2 light chain [Homo sapiens]	0.00177445	8.03253		55043.4	4519803	1 (0 1 0 0 0)
AF249277_1 cervical cancer suppressor-1 [Homo sapiens]	0.00619531	8.03239		9033.64	10442006	1 (0 1 0 0 0)
NIMA (never in mitosis gene a)- related kinase 10 isoform 2 [Homo sapi	0.000509776	6.10809		45252.7	44917615	2 (0 1 1 0 0)
S17512 glucuronosyltransferase (EC 2.4.1.17) - human	0.00579519	6.10765		59918.4	106109	2 (0 1 1 0 0)
glia maturation factor gamma [Homo sapiens]	0.00166977	6.10036		16848.5	19697925	3 (0 1 2 0 0)
KIAA1345 protein [Homo sapiens]	0.00664844	6.09115		175742	7243071	2 (0 1 1 0 0)
hypothetical protein [Homo sapiens]	0.00410305	6.08414		78341.1	50949940	2 (1 0 1 0 0)
AF175078_1 envelope glycoprotein [Human immunodeficiency virus type 1] [MA	0.00890106	6.07454		9228.56	6003400	2 (1 0 1 0 0)
reverse transcriptase [Human immunodeficiency virus 1]	0.00134222	6.06838		24564.6	71844948	2 (1 0 1 0 0)
transport-secretion protein 2.2 (TTS-2.2) [Homo sapiens]	0.00544203	6.06654		58166.4	9663153	2 (0 0 0 1 1)
PPBI_HUMAN Intestinal alkaline phosphatase precursor (IAP)	0.00889938	4.06951		56776.5	130744	3 (0 1 0 0 2)
IgE autoantigen [Homo sapiens]	0.00774717	4.06184		85591	2342526	2 (0 0 0 0 2)
MRS2-like, magnesium homeostasis factor [Mus musculus]	0.000561576	2.06885		53963.6	61656188	5 (2 1 0 1 1)

## Sheet: Control_4_FA
Description	P-value	Score	Coverage	MW	Accession	Peptide (Hits)
I38369 beta-tubulin - human (fragment)	1.98807e-08	162.215		48848.5	2119276	33 (25 5 2 0 1)
2',3'-cyclic-nucleotide 3'-phosphodiesterase (EC 3.1.4.37)	1.7476e-07	132.217		45070.4	180687	21 (16 1 1 2 1)
ferritin, heavy polypeptide 1 [Homo sapiens]	6.96432e-11	100.252		21212.3	56682959	36 (26 6 3 0 1)
tubulin, beta 4 [Homo sapiens]	1.1745e-11	96.234		49553.9	21361322	27 (18 8 1 0 0)
brain creatine kinase [Homo sapiens]	5.45685e-09	94.2123		42617.4	21536286	17 (15 1 0 1 0)
myelin basic protein isoform 1 [Homo sapiens]	4.47929e-06	80.1907		21480	68509930	17 (15 0 1 1 0)
microtubule-associated protein 2 [Homo sapiens]	0.000146867	78.1571		199045	1850617	12 (9 0 1 1 1)
tubulin alpha 6 [Homo sapiens]	2.03148e-06	70.167		49863.5	14389309	19 (18 1 0 0 0)
microtubule-associated protein 1B isoform 1 [Homo sapiens]	0.00067529	54.129		270452	5174525	6 (4 1 1 0 0)
ATP synthase, H+ transporting, mitochondrial F1 complex, alpha subunit	1.90277e-07	52.1887		59713.7	4757810	7 (6 0 0 0 1)
tubulin, beta 2 [Homo sapiens]	9.67346e-09	52.1706		49875	4507729	8 (5 2 1 0 0)
ferritin, light polypeptide [Homo sapiens]	4.60035e-10	50.2214		20007.1	20149498	12 (12 0 0 0 0)
H4 histone family, member A [Homo sapiens]	7.70042e-05	50.1217		11360.4	4504301	6 (6 0 0 0 0)
KIAA0987 protein [Homo sapiens]	0.000635367	50.1127		123629	4589618	8 (6 1 0 0 1)
tubulin, beta, 4 [Homo sapiens]	3.09537e-08	44.2114		50400.3	50592996	12 (6 5 1 0 0)
KIAA0968 protein [Homo sapiens]	2.01649e-07	40.1506		58985.2	4589580	5 (5 0 0 0 0)
LAMC1_HUMAN Laminin subunit gamma-1 precursor (Laminin B2 chain)	2.04935e-05	40.1328		177492	126369	5 (3 0 1 1 0)
brain abundant, membrane attached signal protein 1 [Homo sapiens]	1.61417e-06	40.1261		22680	30795231	4 (4 0 0 0 0)
unnamed protein product [Homo sapiens]	0.00741706	34.0571		81723.7	21757298	5 (2 1 0 1 1)
unnamed protein product [Homo sapiens]	1.39321e-05	32.1097		100614	30076	4 (3 0 0 0 1)
hypothetical protein [Homo sapiens]	0.00936316	32.0975		120235	50949774	5 (2 0 0 3 0)
E1BL_ADE07 E1B protein, large T-antigen	0.0030787	32.0772		54666.7	119031	5 (1 1 1 2 0)
A Chain A, Crystal Structure Of A DictyosteliumTETRAHYMENA CHIMERA Actin	5.33828e-07	30.1847		41719.9	7245526	4 (4 0 0 0 0)
glyceraldehyde-3-phosphate dehydrogenase [Homo sapiens]	3.56178e-08	30.141		36030.4	7669492	3 (3 0 0 0 0)
synapsin I isoform Ia [Homo sapiens]	0.00059667	30.0972		74065.8	19924099	4 (4 0 0 0 0)
eukaryotic translation elongation factor 1 alpha 1 [Homo sapiens]	2.44278e-06	28.1053		50109.2	4503471	4 (2 0 1 0 1)
unnamed protein product [Homo sapiens]	0.00052998	26.1706		49811	10433717	4 (2 1 1 0 0)
tubulin, alpha-like 3 [Homo sapiens]	0.0052522	26.0944		49876.8	13376181	4 (1 3 0 0 0)
S68466 translation elongation factor EF-Tu-like protein P43 precursor, mitochondria	3.84008e-05	24.1632		49502.2	7443384	3 (2 0 0 1 0)
histone H2B [Homo sapiens]	2.2661e-06	24.1472		13927.6	1568557	6 (5 0 0 1 0)
AT2B4_HUMAN Plasma membrane calcium-transporting ATPase 4 (PMCA4)	0.00142473	24.0958		137833	14286105	3 (1 1 1 0 0)
hypothetical protein [Homo sapiens]	0.00456608	24.0839		173956	27597213	3 (1 1 1 0 0)
bromodomain PHD finger transcription factor [Homo sapiens]	0.00973517	24.0824		311017	6683492	3 (1 1 1 0 0)
ATRB actin, skeletal muscle - rabbit	0.00637559	24.0763		41789.8	71611	4 (0 2 1 0 1)
polyamine modulated factor 1 binding protein 1 [Homo sapiens]	0.00309967	24.0734		117405	13775212	3 (1 1 1 0 0)
DNA excision repair cross-complementing protein; similar to human Xerode	0.000445388	24.072		85682.3	9758046	4 (1 0 1 2 0)
KIAA1733 protein [Homo sapiens]	4.85363e-05	24.0677		57432.9	12698011	3 (1 1 1 0 0)
GNAO2_HUMAN Guanine nucleotide-binding protein G(o) subunit alpha 2	0.00619684	22.115		40061.1	60416433	3 (1 1 0 1 0)
GP112_HUMAN Probable G-protein coupled receptor 112	0.00876968	22.0855		300775	51701426	4 (1 1 0 2 0)
brain ryanodine receptor [Homo sapiens]	0.000817973	22.0714		550721	2696015	5 (1 0 0 2 2)
H1 histone family, member 0 [Homo sapiens]	3.4222e-08	20.2279		20850.2	4885371	5 (4 1 0 0 0)
Na+/K+ -ATPase alpha 2 subunit proprotein [Homo sapiens]	1.19691e-09	20.2228		112194	4502271	2 (2 0 0 0 0)
A40671 dynamin, internal form 1, long C-terminal form - human [M	0.00015343	20.172		97201	539580	2 (2 0 0 0 0)
voltage-dependent anion channel 1 [Homo sapiens]	1.46113e-06	20.1657		30753.6	4507879	2 (2 0 0 0 0)
neurofilament, light polypeptide 68kDa [Homo sapiens]	4.30476e-07	20.164		61479.3	105990539	3 (3 0 0 0 0)
histone cluster 1, H1d [Homo sapiens]	6.39005e-06	20.1485		22336.3	4885377	3 (3 0 0 0 0)
tubulin, alpha 1B [Mus musculus]	3.34863e-07	20.1322		50119.6	34740335	3 (3 0 0 0 0)
PDZ domain containing RING finger 3 [Homo sapiens]	0.00938109	20.1309		119521	57529737	5 (2 1 0 1 1)
glial fibrillary acidic protein [Homo sapiens]	1.25788e-05	20.1199		49849.7	4503979	2 (2 0 0 0 0)
H2A histone family, member A [Homo sapiens]	9.85558e-05	20.1174		14127	10645195	4 (3 0 0 1 0)
glycogen phosphorylase [Homo sapiens]	0.00801807	20.0987		97030.8	5032009	4 (0 1 0 3 0)
alpha3b subunit of laminin 5 [Homo sapiens]	0.00269678	20.0895		147912	1149515	10 (3 2 3 1 1)
tubulin, alpha 4 [Mus musculus]	1.93699e-05	20.0874		49892.4	6678467	2 (2 0 0 0 0)
REV3-like, catalytic subunit of DNA polymerase zeta [Homo sapiens]	0.00324467	20.0781		352565	145312262	4 (1 0 1 0 2)
COL1A1 and PDGFB fusion transcript [Homo sapiens] [M	0.00379395	20.0687		36963.2	3288487	2 (2 0 0 0 0)
unnamed protein product [Homo sapiens]	0.00590897	20.0682		146027	35514	2 (2 0 0 0 0)
developmentally regulated GTP binding protein 2 [Homo sapiens]	0.00210775	20.0639		40720.4	4557537	3 (1 0 1 1 0)
hypothetical protein [Homo sapiens]	4.10661e-09	18.1582		99430.4	21732278	3 (1 0 1 0 1)
dihydropyrimidinase-like 2 [Homo sapiens]	1.95122e-06	18.1237		62254.7	4503377	3 (2 1 0 0 0)
dedicator of cytokinesis 4, isoform CRA_d [Homo sapiens]	0.00406514	18.1061		166436	119603860	3 (1 2 0 0 0)
tubulin, beta, 2 [Homo sapiens]	0.000137827	18.1037		49799	5174735	3 (1 1 1 0 0)
SI:dZ87I4.1 (novel protein similar to human signal transducer and activ	0.00262006	18.0981		132636	22316176	2 (1 1 0 0 0)
calcium/calmodulin-dependent protein kinase II gamma isoform 1 [Mus mu	0.00229391	18.0809		59569.4	75991700	2 (1 1 0 0 0)
human immunodeficiency virus type I enhancer binding protein 2 [Mus mu	0.00869199	18.0808		266535	85861241	4 (2 0 0 2 0)
GLB1L3 protein [Homo sapiens]	0.000210508	18.0807		35367.5	33877525	3 (1 1 1 0 0)
sorting nexin 17 [Homo sapiens]	0.000246638	18.0768		52868.2	7661890	2 (1 1 0 0 0)
hCG1641919, isoform CRA_b [Homo sapiens]	0.00461988	18.0743		24144.8	119629217	2 (1 1 0 0 0)
N-ethylmaleimide-sensitive factor [Homo sapiens]	4.04171e-05	18.0724		82602.2	11079228	2 (1 1 0 0 0)
pol protein [Human immunodeficiency virus 1]	0.00417338	18.0694		57094.5	116277422	2 (1 1 0 0 0)
ACBD4 protein [Homo sapiens]	0.00809496	18.0638		37761.4	26996542	2 (1 1 0 0 0)
T00389 hypothetical protein KIAA0615 - human	0.00761423	18.0599		100346	7452075	2 (1 1 0 0 0)
zinc finger protein 560 [Homo sapiens]	0.0026076	18.0584		91061.6	124517687	3 (1 0 0 2 0)
novel protein similar to H.sapiens PCLO, piccolo (presynaptic cytomatr	0.00171379	18.0548		181668	148726421	3 (0 1 1 1 0)
E1 [Human papillomavirus type 96]	0.00314841	18.0548		70613.8	37595917	2 (1 1 0 0 0)
AF179681_1 unknown [Homo sapiens]	0.00564941	18.0544		120978	8099354	3 (1 0 1 0 1)
hypothetical protein DDBDRAFT_0217430 [Dictyostelium discoideum AX4]	0.00649031	18.0529		102132	66822043	2 (1 1 0 0 0)
ADP-ribosylation factor GTPase activating protein 1 isoform a [Homo sap	0.000649069	16.0925		44640.3	8922652	2 (0 2 0 0 0)
unnamed protein product [Homo sapiens]	1.09785e-06	16.0888		72215.9	825646	3 (2 0 1 0 0)
Mitochondrial hsp70-type molecular chaperone, required for assembly of	0.00521854	16.0867		72320.2	6323401	3 (0 1 1 0 1)
testes development-related NYD-SP22 isoform 1 [Mus musculus]	0.00249237	16.0809		29919.5	114520613	3 (0 1 0 2 0)
AF228313_1 tyrosine kinase LCK [Homo sapiens]	0.00687532	16.0725		56559.5	6984209	3 (2 0 1 0 0)
CE152_HUMAN Centrosomal protein of 152 kDa (Cep152 protein)	0.0019896	16.0702		147252	62286590	3 (1 0 0 1 1)
PAQRA_HUMAN Monocyte to macrophage differentiation factor 2 (Progestin and ad	0.00917891	16.0669		31242.7	51701810	2 (1 0 1 0 0)
Rho guanine nucleotide exchange factor (GEF) 19 [Homo sapiens]	0.00763221	16.0662		89141.9	40255149	2 (1 0 1 0 0)
synapse-associated protein 102 isoform a [Homo sapiens]	0.00302238	16.0596		90257.7	119943106	2 (1 0 1 0 0)
unnamed protein product [Homo sapiens]	0.00188145	16.0546		17737	16553812	2 (1 0 1 0 0)
hypothetical protein [Homo sapiens]	0.00218919	16.0382		110726	30268198	2 (1 0 1 0 0)
KIAA1708 [Homo sapiens]	2.38183e-05	14.2079		185022	30725047	2 (1 0 0 1 0)
adaptor protein complex AP-2, mu1 [Mus musculus]	2.44987e-05	14.1603		49623.1	6753074	2 (1 0 0 1 0)
unnamed protein product [Homo sapiens]	0.00119145	14.1181		69301.8	30023	2 (1 0 0 1 0)
neurofilament, medium polypeptide 150kDa [Homo sapiens]	0.00898346	14.0739		102386	4885513	2 (1 0 0 1 0)
mindbomb homolog 1 [Homo sapiens]	0.00763473	14.0731		110066	30348954	3 (0 2 1 0 0)
cleavage and polyadenylation specific factor 1, 160kDa [Homo sapiens]	0.00422992	14.0689		160782	56676371	2 (1 0 0 1 0)
unnamed protein product [Homo sapiens]	0.0069664	14.0531		26848.3	14042655	2 (0 1 1 0 0)
hCG2040895 [Homo sapiens]	0.00894208	14.0514		10016.9	119630848	2 (1 0 0 1 0)
coiled-coil domain containing 7 [Homo sapiens]	0.00403247	14.05		55745	37059792	2 (1 0 0 1 0)
cytochrome c oxidase subunit Vb precursor [Homo sapiens]	3.97586e-06	12.114		13686.9	17017988	2 (1 0 0 0 1)
acidic (leucine-rich) nuclear phosphoprotein 32 family, member A [Homo	0.00198123	12.0717		28568.3	5453880	2 (0 0 2 0 0)
FBN2_HUMAN Fibrillin-2 precursor	0.00981705	12.0711		314130	1345961	2 (1 0 0 0 1)
PHC1_HUMAN Polyhomeotic-like protein 1 (hPH1) (Early development regulatory p	0.0098218	12.0694		105353	25090239	2 (0 1 0 1 0)
calcium/calmodulin-dependent protein kinase kinase 2 beta isoform 4 [H	0.00500567	12.0657		54791.9	27437019	2 (0 0 2 0 0)
component of oligomeric golgi complex 8 [Homo sapiens]	0.00490027	12.0589		68408.6	21166361	2 (0 0 2 0 0)
TSC22 domain family, member 1 isoform 2 [Homo sapiens]	0.00367715	10.1607		15669.9	5174729	4 (3 1 0 0 0)
similar to 60S ribosomal protein L17 (L23) (Amino acid starvation-induce	6.11551e-05	10.1514		11895.2	51094799	1 (1 0 0 0 0)
keratin 10 [Homo sapiens]	0.00110648	10.1471		58791.5	40354192	1 (1 0 0 0 0)
A unnamed protein product [Homo sapiens]	0.0068696	10.137		21184.2	122919718	2 (1 0 1 0 0)
A45036 single-stranded-DNA-binding protein Pur alpha - human [MA	2.37605e-06	10.1336		34948.5	346338	1 (1 0 0 0 0)
K1H1_HUMAN Keratin, type I cuticular Ha1 (Hair keratin, type I Ha1) (Keratin-3	0.000342338	10.1319		47202.1	6016413	2 (1 1 0 0 0)
pol protein [Human immunodeficiency virus 1]	0.00856016	10.121		45544.3	77378822	1 (1 0 0 0 0)
ADT3_HUMAN ADP/ATP translocase 3 (Adenine nucleotide translocator 2) (ANT 3) (A	0.000595259	10.119		32845.2	113463	1 (1 0 0 0 0)
ribosomal protein L23a [Homo sapiens]	1.24667e-06	10.1167		17684.1	17105394	3 (3 0 0 0 0)
Chain , Ferritin (H-Chain) Mutant (Lys 86 Replaced By Gln) (K86q)	1.61345e-05	10.1155		21212.3	229918	2 (2 0 0 0 0)
cyclin A1 [Homo sapiens]	0.000477364	10.1131		52324.5	4502611	1 (1 0 0 0 0)
reverse transcriptase [Human immunodeficiency virus 1]	0.00143635	10.1124		22384.5	67079717	3 (1 2 0 0 0)
collapsin response mediator protein 1 isoform 2 [Homo sapiens]	0.000960296	10.1113		62144.8	4503051	1 (1 0 0 0 0)
immunoglobulin heavy chain variable region [Homo sapiens]	0.000642163	10.108		13049.5	9968368	2 (0 0 1 1 0)
envelope glycoprotein [Human immunodeficiency virus type 1]	0.00733883	10.1075		97312.9	1079599	2 (0 0 1 1 0)
sine oculis homeobox homolog 6 [Homo sapiens]	0.00894812	10.1069		27647.3	6677979	4 (1 2 1 0 0)
Chain , The Alzheimer`s Disease Amyloid A4 Peptide (Residues 1-40)	0.00114432	10.1062		4327.15	1310912	1 (1 0 0 0 0)
human immunodeficiency virus type I enhancer binding protein 1 [Rattus	0.00142014	10.1059		287407	149045121	1 (1 0 0 0 0)
solute carrier family 25 (mitochondrial carrier; adenine nucleotide tr	0.000678748	10.1048		33043.2	55749577	1 (1 0 0 0 0)
tyrosine 3-monooxygenase/tryptophan 5-monooxygenase activation protein,	0.00108299	10.1032		28284.9	9507245	1 (1 0 0 0 0)
Sp2 protein	0.00886078	10.0978		52972.7	338301	1 (1 0 0 0 0)
ADP-ribosylation factor GTPase activating protein 1 isoform a variant [	0.0057911	10.0926		44641.2	62898415	1 (1 0 0 0 0)
pol protein [Human immunodeficiency virus type 1]	0.00485479	10.091		23629.3	12656522	1 (1 0 0 0 0)
ubiquinol-cytochrome c reductase core protein II [Homo sapiens]	0.00978095	10.0881		48412.9	50592988	1 (1 0 0 0 0)
synaptosomal-associated protein, 25kDa [Homo sapiens]	0.00019732	10.0868		10676	24740601	1 (1 0 0 0 0)
meprin A, alpha (PABA peptide hydrolase) [Homo sapiens]	0.00980137	10.0857		84314.3	5031909	2 (0 0 1 1 0)
A Chain A, Glutathione Transferase ZetaMALEYLACETOACETATE ISOMERASE	0.00236525	10.0854		24067.6	15988159	1 (1 0 0 0 0)
similar to t-complex 1; T-complex locus TCP-1; t-complex 1 (a murine tcp	0.00529073	10.0841		19812.7	51094756	13 (8 3 1 0 1)
histone cluster 1, H1a [Homo sapiens]	0.00123743	10.0803		21828.9	4885373	1 (1 0 0 0 0)
histone H2A.2 [Homo sapiens]	0.000180324	10.0797		13898.5	31979	1 (1 0 0 0 0)
MYH14_HUMAN Myosin-14 (Myosin heavy chain 14) (Myosin heavy chain, nonmuscle	0.00724523	10.0793		227861	71151982	2 (0 0 1 1 0)
tat protein [Human immunodeficiency virus 1]	0.00404274	10.0773		11647.8	71725996	1 (1 0 0 0 0)
H1 histone family, member X [Homo sapiens]	7.06394e-06	10.0759		22473.5	5174449	2 (2 0 0 0 0)
hCG1644256 [Homo sapiens]	0.00391583	10.0756		24615.4	119598438	1 (1 0 0 0 0)
collagen, type XXVII, alpha 1 [Homo sapiens]	0.00617248	10.0742		186775	32140760	1 (1 0 0 0 0)
ets variant gene 6 [Homo sapiens]	0.00336314	10.0741		52966.7	4503611	1 (1 0 0 0 0)
immunoglobulin lambda light chain variable region [Homo sapiens]	0.00671677	10.0722		10242.9	4761992	1 (1 0 0 0 0)
A Chain A, Crystal Structure Of Human Agx1 Complexed With Udpglcnac	0.00602503	10.0719		56992.2	23200205	1 (1 0 0 0 0)
envelope glycoprotein [Human immunodeficiency virus 1]	0.00283526	10.0712		23269.5	46252890	1 (1 0 0 0 0)
pol polyprotein [Human immunodeficiency virus type 1]	0.000335554	10.0712		40726.5	13738224	1 (1 0 0 0 0)
HESB like domain containing 1 [Homo sapiens]	0.00561953	10.0709		16413.1	34996487	1 (1 0 0 0 0)
abl interactor 2, isoform CRA_b [Homo sapiens] [MAS	0.0020155	10.0671		40772.4	119590742	1 (1 0 0 0 0)
chromosome X open reading frame 55 [Homo sapiens]	0.000977455	10.0666		114684	119623025	2 (0 0 1 1 0)
elongation protein 4 homolog [Homo sapiens]	0.00871637	10.0654		46558.3	91208435	1 (1 0 0 0 0)
hypothetical protein LOC67944 [Mus musculus]	0.00516017	10.0652		42691.5	125347370	1 (1 0 0 0 0)
nucleotide-binding oligomerization domain containing 1 [Homo sapiens]	0.00896668	10.0644		107622	5174617	3 (0 1 1 1 0)
envelope glycoprotein [Human immunodeficiency virus 1]	0.00789818	10.0634		11167	115279856	1 (1 0 0 0 0)
AF248650_1 RNA-binding protein BRUNOL4 [Homo sapiens]	0.000322529	10.0626		31862.5	9246977	1 (1 0 0 0 0)
hCG1795423, isoform CRA_b [Homo sapiens]	0.000631017	10.0624		37311.1	119625802	1 (1 0 0 0 0)
Plasminogen [Homo sapiens]	0.00267643	10.0616		90526.2	38051823	1 (1 0 0 0 0)
sodium channel, voltage gated, type VIII, alpha [Homo sapiens]	0.00763997	10.0612		225132	7657544	1 (1 0 0 0 0)
envelope glycoprotein gp120 [Human immunodeficiency virus 1]	0.00443933	10.061		25012.5	85663022	1 (1 0 0 0 0)
BNIPXL-beta [Homo sapiens]	0.00533398	10.0608		81525.7	38259615	1 (1 0 0 0 0)
U55A [Human herpesvirus 7]	0.00392692	10.0595		49804.1	51874278	1 (1 0 0 0 0)
gag protein [Human immunodeficiency virus 1]	0.00415043	10.0593		55271.2	86753662	1 (1 0 0 0 0)
KIAA1010 protein [Homo sapiens]	0.00894264	10.0589		148346	4589670	2 (0 1 0 0 1)
gp120 [Human immunodeficiency virus type 1]	0.00542075	10.0574		9919.14	2078101	1 (1 0 0 0 0)
ATPase family, AAA domain containing 3B [Homo sapiens]	0.000111131	10.0571		13937.3	56204892	1 (1 0 0 0 0)
hCG1642465 [Homo sapiens]	0.000159363	10.0571		9810.54	119600167	1 (1 0 0 0 0)
sterile alpha motif domain containing 11 [Homo sapiens]	0.00599151	10.0569		72633.2	76881819	1 (1 0 0 0 0)
6-phosphofructo-2-kinase/fructose-2,6-biphosphatase 1 [Homo sapiens]	0.00559496	10.0563		54646.7	118582286	1 (1 0 0 0 0)
nef protein [Human immunodeficiency virus 1]	0.00225422	10.0558		24119.3	94538804	1 (1 0 0 0 0)
envelope glycoprotein [Human immunodeficiency virus 1]	0.0043705	10.0558		26166.3	73336891	1 (1 0 0 0 0)
AF138484_1 envelope glycoprotein [Human immunodeficiency virus type 1] [MA	0.00260137	10.0554		22189.2	6958872	1 (1 0 0 0 0)
kelch-like 26 [Homo sapiens]	0.00165996	10.0552		68095.8	8922854	2 (0 1 0 0 1)
Histocompatibility (minor) HA-1 [Homo sapiens] [MAS	0.00386419	10.0546		124474	40807045	1 (1 0 0 0 0)
ZNF41_HUMAN Zinc finger protein 41	0.00602439	10.0541		93668	20141930	1 (1 0 0 0 0)
immunoglobulin heavy chain variable region [Homo sapiens]	0.0033691	10.0541		9304.43	16075830	1 (1 0 0 0 0)
calcium/calmodulin-dependent protein kinase IIB isoform 8 [Homo sapien	0.000305895	10.0536		50923	26051218	1 (1 0 0 0 0)
AF310672_1 PF20 variant 1a [Homo sapiens]	0.0032129	10.0536		70746.3	21591141	1 (1 0 0 0 0)
hnRNP U protein [Homo sapiens]	0.00517395	10.0529		88890.2	32358	1 (1 0 0 0 0)
zinc finger protein 681 [Homo sapiens]	0.00508608	10.052		66577.7	19923078	1 (1 0 0 0 0)
alpha-glucosidase [Homo sapiens]	0.00641511	10.0508		105287	114159823	2 (0 0 1 1 0)
glutamate receptor, metabotropic 7 isoform a precursor [Homo sapiens]	0.0070572	10.05		102185	4504147	1 (1 0 0 0 0)
pentatricopeptide repeat domain 2 [Homo sapiens]	0.00216433	10.0497		43939.3	98986331	1 (1 0 0 0 0)
pol protein [Human immunodeficiency virus type 1] [	0.00938479	10.0497		36442.2	13604572	1 (1 0 0 0 0)
hCG2003853 [Homo sapiens]	0.00345913	10.0497		14745.3	119581723	1 (1 0 0 0 0)
terminal uridylyl transferase 1, U6 snRNA-specific [Homo sapiens]	0.000873679	10.0491		93730.5	12383074	1 (1 0 0 0 0)
capsid protein VP1 [Human poliovirus 1]	0.00913374	10.048		33351.7	7008454	1 (1 0 0 0 0)
immunoglobulin heavy chain variable region [Homo sapiens]	0.00143153	10.0472		13541.8	4837929	1 (1 0 0 0 0)
hypothetical protein LOC56063 [Homo sapiens]	0.00821071	10.0466		14867	98162668	1 (1 0 0 0 0)
solute carrier family 25 (mitochondrial carrier, Aralar), member 12 [H	0.00919075	10.0458		74715	21361103	1 (1 0 0 0 0)
RNA polymerase [Human calicivirus NLV/VA98387/1998]	0.000683066	10.0451		29048.7	15192716	1 (1 0 0 0 0)
hCG1641016 [Homo sapiens]	0.00307748	10.045		52653.8	119605330	2 (0 1 0 0 1)
envelope glycoprotein [Human immunodeficiency virus 1]	0.00549997	10.0442		38457.8	42425562	1 (1 0 0 0 0)
FIBP_ADE08 Fiber protein (pIV)	0.006374	10.0439		39636.4	544296	1 (1 0 0 0 0)
hypothetical protein [Homo sapiens]	0.00825892	10.0438		61820.9	52545951	1 (1 0 0 0 0)
hCG38985 [Homo sapiens]	0.00282164	10.0438		12875.3	119632120	1 (1 0 0 0 0)
cell division cycle associated 8 [Homo sapiens]	0.00687646	10.0436		31303.8	8922438	1 (1 0 0 0 0)
DNA polymerase [Human adenovirus type 5]	0.00134276	10.0432		135433	58177692	1 (1 0 0 0 0)
T-cell receptor beta chain [Homo sapiens]	0.00807432	10.0429		5085.47	1197263	1 (1 0 0 0 0)
gp120 protein [Human immunodeficiency virus 1] [MA	0.00599479	10.0411		23940.8	34786292	1 (1 0 0 0 0)
A55144 autotaxin precursor - human	0.0019336	10.0408		105179	1082243	1 (1 0 0 0 0)
envelope glycoprotein [Human immunodeficiency virus 1]	0.00928289	10.0402		96080.4	89477346	1 (1 0 0 0 0)
immunoglobulin heavy chain variable region 194-77 [Homo sapiens]	0.00456046	10.0359		10734	7208348	1 (1 0 0 0 0)
unnamed protein product [Homo sapiens]	0.00627503	8.14557		30614	22760872	3 (2 1 0 0 0)
hypothetical protein FLJ90166, isoform CRA_b [Homo sapiens]	0.000829599	8.12245		87225.3	119595898	1 (0 1 0 0 0)
envelope glycoprotein [Human immunodeficiency virus 1]	0.00251076	8.11793		19914.3	125395709	1 (0 1 0 0 0)
ALL1 fused gene from 5q31 [Homo sapiens]	0.00571102	8.10845		127382	7656879	2 (0 2 0 0 0)
glutamate transporter [Homo sapiens]	0.00105866	8.10548		61664.6	488752	1 (0 1 0 0 0)
S31503 H+/K+-exchanging ATPase (EC 3.6.3.10) ATP1AL1 - human (fragment)	0.00351872	8.10418		10485.2	346261	1 (0 1 0 0 0)
major DNA binding protein [Human herpesvirus 6B]	0.00479891	8.1003		127736	9633112	1 (0 1 0 0 0)
hypothetical protein [Homo sapiens]	0.00909311	8.09895		36669	6807736	1 (0 1 0 0 0)
unnamed protein product [Homo sapiens]	0.00837974	8.09565		37141.6	21757207	1 (0 1 0 0 0)
unnamed protein product [Homo sapiens]	0.00264807	8.09503		27364.8	10436925	1 (0 1 0 0 0)
early protein [Human papillomavirus type 9]	0.00281449	8.08901		17266.7	9627397	1 (0 1 0 0 0)
pol protein [Human immunodeficiency virus 1]	0.00349158	8.0877		38853.6	57236719	1 (0 1 0 0 0)
RAB12, member RAS oncogene family [Homo sapiens]	0.00250985	8.08732		27231.1	106507164	1 (0 1 0 0 0)
E1B 19K protein [Human adenovirus type 9]	0.00383518	8.0868		21128.5	4323357	2 (0 0 1 0 1)
reverse transcriptase [Human immunodeficiency virus]	0.00495259	8.07967		7993.33	5596860	1 (0 1 0 0 0)
SNARE protein Ykt6 variant [Homo sapiens]	0.00639803	8.07773		22419.4	62898708	1 (0 1 0 0 0)
hypothetical protein [Homo sapiens]	0.00173956	8.07699		229116	51476593	2 (1 1 0 0 0)
unnamed protein product [Homo sapiens]	0.00185649	8.07617		67062.8	10438181	1 (0 1 0 0 0)
JC2363 protein kinase (EC 2.7.1.37) ZPK - human	0.00894017	8.07589		73114.6	631347	1 (0 1 0 0 0)
envelope glycoprotein [Human immunodeficiency virus type 1]	0.00733883	8.07528		97096	1079597	1 (0 1 0 0 0)
gp120 protein [Human immunodeficiency virus 1] [MA	0.000724479	8.07282		24903.3	34786178	2 (0 0 1 0 1)
p24 [Human immunodeficiency virus 1]	0.00316695	8.06814		21952.2	7532596	1 (0 1 0 0 0)
AF362994_2 pol protein [Human immunodeficiency virus type 1]	0.00748918	8.06787		113715	14269048	1 (0 1 0 0 0)
gag protein [Human immunodeficiency virus 1]	0.00857412	8.06748		15958.9	55979821	1 (0 1 0 0 0)
pol protein [Human immunodeficiency virus type 1] [	0.00048668	8.06725		24109.5	12656540	2 (0 0 1 0 1)
AF237982_1 oxysterol 7alpha-hydroxylase [Homo sapiens]	0.00998815	8.06702		54094.7	7533024	1 (0 1 0 0 0)
gag protein [Human immunodeficiency virus 1]	0.00233694	8.06601		55388.2	45361102	1 (0 1 0 0 0)
envelope protein [Human immunodeficiency virus type 1]	0.00773521	8.06508		96900.6	10732724	1 (0 1 0 0 0)
WDR37 protein [Homo sapiens]	0.00803592	8.0624		29277.1	17390082	1 (0 1 0 0 0)
mixed lineage kinase domain-like [Homo sapiens]	0.00799292	8.06239		54444.6	22749323	1 (0 1 0 0 0)
Protein of unknown function that may interact with ribosomes, based on	0.000534608	8.06235		19165.6	6323683	1 (0 1 0 0 0)
unnamed protein product [Homo sapiens]	0.00319932	8.06119		114092	10434608	1 (0 1 0 0 0)
A30359 P-selectin precursor - human	0.00776322	8.06086		90694.4	87597	1 (0 1 0 0 0)
patatin-like phospholipase domain containing 8 [Homo sapiens]	0.0081871	8.06063		88421.1	48525351	2 (0 0 0 2 0)
phosphoinositide-3-kinase, regulatory subunit 4, p150 [Homo sapiens]	0.0035119	8.05953		153006	23943912	1 (0 1 0 0 0)
FAT tumor suppressor homolog 2 [Mus musculus]	0.00505513	8.05935		479811	71725377	1 (0 1 0 0 0)
envelope glycoprotein [Human immunodeficiency virus 1]	0.00102065	8.05934		14221.5	93009513	1 (0 1 0 0 0)
argininosuccinate synthetase, isoform CRA_b [Homo sapiens]	0.00910293	8.0573		50732.1	119608339	7 (2 3 1 1 0)
Unknown (protein for MGC:102982) [Homo sapiens] [MA	0.00861327	8.05707		24559.1	62204157	1 (0 1 0 0 0)
protocadherin gamma subfamily B, 5 isoform 2 precursor [Homo sapiens]	0.0028845	8.05632		89108.4	14270505	1 (0 1 0 0 0)
envelope glycoprotein [Human immunodeficiency virus 1]	0.00168625	8.05346		22348.3	49790342	1 (0 1 0 0 0)
sterol carrier protein 2 isoform 1 proprotein [Homo sapiens]	0.00856508	8.05345		58955.7	19923233	2 (0 0 0 2 0)
unnamed protein product [Homo sapiens]	0.00267808	8.0529		13947.4	21758833	1 (0 1 0 0 0)
novel protein similar to human and mouse thyroid hormone receptor inter	0.00212345	8.05212		59656.3	37606133	1 (0 1 0 0 0)
early protein [Human papillomavirus type 7]	0.00674966	8.05124		17869.8	9627390	1 (0 1 0 0 0)
envelope glycoprotein [Human immunodeficiency virus type 1]	0.00402273	8.05106		96907.6	2231594	1 (0 1 0 0 0)
envelope glycoprotein [Human immunodeficiency virus 1]	0.00696676	8.05069		12652.7	72538837	1 (0 1 0 0 0)
gag protein [Human immunodeficiency virus 1]	0.0075797	8.05064		55658.4	86560244	1 (0 1 0 0 0)
zinc finger protein 484 isoform a [Homo sapiens]	0.00602439	8.04978		98157.8	55741876	1 (0 1 0 0 0)
chromosome 11 open reading frame 8 variant [Homo sapiens]	0.00440918	8.04868		31757.2	62087906	1 (0 1 0 0 0)
p24 [Human immunodeficiency virus 1]	0.00668402	8.04849		25860.1	28172755	1 (0 1 0 0 0)
interferon-stimulated transcription factor 3, gamma 48kDa [Homo sapien	0.00347657	8.0482		43668.8	25282407	1 (0 1 0 0 0)
envelope glycoprotein [Human immunodeficiency virus 1]	0.00838547	8.04792		36268.1	42425921	1 (0 1 0 0 0)
pol protein [Human immunodeficiency virus type 1] [	0.00851637	8.04728		43185.7	14165053	1 (0 1 0 0 0)
AF383240_1 envelope glycoprotein [Human immunodeficiency virus type 1] [M	0.00340403	8.04613		98049.1	19773761	1 (0 1 0 0 0)
pol protein [Human immunodeficiency virus type 1] [	0.00225042	8.046		38185.2	13604940	1 (0 1 0 0 0)
KIAA1775 protein [Homo sapiens]	0.00515145	8.04552		93406	14625445	1 (0 1 0 0 0)
ATP synthase F0 subunit 6 [Homo sapiens]	0.00920039	8.04548		24740.8	116517983	1 (0 1 0 0 0)
envelope glycoprotein [Human immunodeficiency virus 1]	0.00782249	8.04515		21856.8	18537857	1 (0 1 0 0 0)
unnamed protein product [Homo sapiens]	0.00851303	8.04494		54246.5	34529091	1 (0 1 0 0 0)
envelope glycoprotein [Human immunodeficiency virus 1]	0.00549997	8.04425		97307.9	60652130	1 (0 1 0 0 0)
AF235911_1 immunoglobulin heavy chain variable region [Homo sapiens] [MAS	0.00766103	8.04345		7324.42	13172158	1 (0 1 0 0 0)
retinoic acid induced 1, isoform CRA_d [Homo sapiens]	0.000553158	8.0411		115150	119576099	1 (0 1 0 0 0)
envelope glycoprotein [Human immunodeficiency virus 1]	0.00928289	8.04016		95523.2	89477376	1 (0 1 0 0 0)
similar to GenBank Accession Number AF130115 PRO2783 in Homo sapiens [Sc	0.00586661	8.03775		16199.2	29841317	1 (0 1 0 0 0)
structural protein 2 [Rotavirus C]	0.00842743	6.09685		101609	80984707	8 (2 3 2 0 1)
KV1L_HUMAN Ig kappa chain V-I region Kue	0.00175647	6.08569		12119	125768	2 (0 0 0 1 1)
proteasome 26S non-ATPase subunit 12 [Homo sapiens]	0.00428465	6.05544		52870.6	4506221	2 (0 0 0 1 1)
UTP14, U3 small nucleolar ribonucleoprotein, homolog A [Homo sapiens]	0.00516477	6.05146		87924.2	21361348	2 (0 0 0 1 1)
bestrophin [Homo sapiens]	0.000148887	6.04562		67640.6	4759310	2 (0 0 0 1 1)
KIAA0316 protein [Homo sapiens]	0.00316033	6.04351		150163	27529708	2 (0 0 0 1 1)
immunity-related GTPase family, Q [Homo sapiens]	0.00580873	4.07137		62678.6	56090582	2 (0 0 0 0 2)
interleukin 29 [Homo sapiens]	0.0094722	4.06301		21884.7	26024325	3 (1 0 0 2 0)
seven transmembrane helix receptor [Homo sapiens]	0.00786198	4.05666		104375	21928479	2 (0 0 0 0 2)
protocadherin beta 4 precursor [Homo sapiens]	5.55406e-05	2.08865		87216.5	9256616	2 (0 1 0 0 1)
pol protein [Human T-lymphotropic virus 3]	0.00181335	2.08806		24392.7	62240428	6 (2 1 0 2 1)
