# Supplementary material for: ER stress induced immunopathology involving complement in CADASIL: implications for therapeutics
Source: Acta Neuropathol Commun. 2023 May 8;11:76. doi: 10.1186/s40478-023-01558-1 (PMC10169505; doi:10.1186/s40478-023-01558-1)
Supplement: Supplementary file 3 — Supplementary Material 3 [file 40478_2023_1558_MOESM3_ESM.xlsx]

## Sheet: Control_1_UT
ER Stress Induced Immunopathology involving Complement in CADASIL: Implications for Therapeutics
Mahmod Panahi, Yoshiki Hase, Xavier Gallart-Palau, Sumonto Mitra, Atsushi Watanabe, Roger C Low, Yumi Yamamoto, Diego Sepulveda-Falla, Atticus H Hainsworth, Masafumi Ihara, Siu Kwan Sze, Matti Viitanen, Homira Behbahani, Raj N Kalaria
Supplementary information
Supplementary dataset 2: List of total proteins identified by LC-MS/MS in UT fractions of control subjects. Each tab referes to the total proteins identified in each individual.
Description	P -value	Score	MW	Accession	Peptide (Hits)
glial fibrillary acidic protein [Homo sapiens]	7.59972e-10	316.215	49849.7	4503979	50 (40 3 5 1 1)
2',3'-cyclic-nucleotide 3'-phosphodiesterase (EC 3.1.4.37)	7.0545e-12	280.334	45070.4	180687	79 (74 2 1 0 2)
syntaxin binding protein 1 isoform a [Homo sapiens]	2.81467e-08	276.231	68692.3	4507297	50 (46 0 2 2 0)
I38369 beta-tubulin - human (fragment)	1.49658e-12	256.303	48848.5	2119276	141 (113 12 10 3 3)
ATP synthase, H+ transporting, mitochondrial F1 complex, alpha subunit	7.11953e-10	198.24	59713.7	4757810	36 (33 1 1 0 1)
neurofilament, light polypeptide 68kDa [Homo sapiens]	2.1015e-11	198.212	61479.3	105990539	31 (24 5 0 1 1)
microtubule-associated protein 2 [Homo sapiens]	2.59324e-08	184.21	199045	1850617	22 (19 0 1 0 2)
neurofilament, medium polypeptide 150kDa [Homo sapiens]	2.89269e-11	170.303	102386	4885513	25 (20 1 2 0 2)
KIAA0987 protein [Homo sapiens]	4.58886e-14	168.327	123629	4589618	21 (17 1 0 2 1)
brain creatine kinase [Homo sapiens]	1.24975e-09	162.242	42617.4	21536286	58 (49 3 3 2 1)
N-ethylmaleimide-sensitive factor [Homo sapiens]	1.10258e-06	156.189	82602.2	11079228	17 (16 0 1 0 0)
tubulin alpha 6 [Homo sapiens]	2.09233e-11	154.259	49863.5	14389309	94 (79 9 3 2 1)
KIAA0325 protein [Homo sapiens]	0.000590867	148.146	533404	71891782	23 (10 2 3 3 5)
tubulin, beta 4 [Homo sapiens]	8.48632e-11	146.234	49553.9	21361322	86 (63 19 2 1 1)
internexin neuronal intermediate filament protein, alpha [Homo sapiens	6.73703e-06	136.219	55357.5	14249342	15 (12 2 0 0 1)
heat shock 90kDa protein 1, beta [Homo sapiens]	5.26899e-09	134.213	83212.2	20149594	23 (13 5 0 2 3)
ANK2_HUMAN Ankyrin-2 (Brain ankyrin) (Ankyrin-B) (Ankyrin, nonerythroid)	7.76371e-07	134.192	430079	1703310	16 (11 2 0 1 2)
A40671 dynamin, internal form 1, long C-terminal form - human [M	2.92896e-14	132.351	97201	539580	32 (23 4 4 0 1)
tyrosine 3/tryptophan 5 -monooxygenase activation protein, epsilon poly	8.91614e-08	130.188	29155.4	5803225	19 (17 1 0 1 0)
Na+/K+ -ATPase alpha 2 subunit proprotein [Homo sapiens]	7.92347e-11	124.254	112194	4502271	24 (21 1 1 1 0)
KIAA0968 protein [Homo sapiens]	1.27328e-10	120.176	58985.2	4589580	26 (21 4 0 1 0)
clathrin heavy chain 1 [Homo sapiens]	7.87003e-09	118.229	191492	4758012	17 (11 1 1 3 1)
voltage-dependent anion channel 1 [Homo sapiens]	5.67668e-11	118.197	30753.6	4507879	21 (20 1 0 0 0)
G02520 plectin - human	1.01176e-11	112.232	518172	7442004	16 (5 4 2 4 1)
A Chain A, Crystal Structure Of A DictyosteliumTETRAHYMENA CHIMERA Actin (Mutan	3.51798e-09	110.206	41719.9	7245526	30 (21 2 4 1 2)
B46091 H+-exporting ATPase (EC 3.6.3.6) chain A, vacuolar (VA68 type) - human	2.67751e-07	106.206	68204.5	1082432	12 (11 0 1 0 0)
KIAA0417 [Homo sapiens]	7.55663e-08	106.204	78381.4	2887409	14 (7 1 3 2 1)
SPTAN1 protein [Homo sapiens]	1.44961e-07	104.166	282106	31565122	18 (8 2 1 3 4)
unknown [Homo sapiens]	9.37356e-08	104.163	268547	62988842	14 (8 3 1 0 2)
tubulin, beta, 4 [Homo sapiens]	5.89694e-14	102.298	50400.3	50592996	40 (24 13 2 1 0)
brain abundant, membrane attached signal protein 1 [Homo sapiens]	1.96509e-13	100.253	22680	30795231	21 (20 1 0 0 0)
Na+/K+ -ATPase alpha 1 subunit isoform a proprotein [Homo sapiens]	5.44009e-13	100.227	112824	21361181	13 (13 0 0 0 0)
tyrosine 3-monooxygenase/tryptophan 5-monooxygenase activation protein,	8.71847e-07	100.221	28064.8	4507949	23 (17 3 2 0 1)
Na+,K+ ATPase [Homo sapiens]	2.11012e-08	98.2099	111901	1359715	15 (11 2 2 0 0)
ubiquitin carboxyl-terminal esterase L1 (ubiquitin thiolesterase) [Hom	1.67916e-08	98.1965	24808.5	21361091	16 (14 0 0 2 0)
contactin 1 isoform 1 precursor [Homo sapiens]	2.28263e-10	98.1887	113249	28373117	13 (8 1 2 2 0)
tyrosine 3-monooxygenase/tryptophan 5-monooxygenase activation protein,	1.08779e-06	98.1654	28284.9	9507245	17 (16 1 0 0 0)
microtubule-associated protein 1B isoform 1 [Homo sapiens]	5.38829e-10	96.2125	270452	5174525	13 (10 0 2 1 0)
eukaryotic translation elongation factor 1 alpha 1 [Homo sapiens]	4.34844e-06	96.142	50109.2	4503471	12 (11 0 1 0 0)
STX1B_HUMAN Syntaxin-1B1 (Syntaxin 1B)	1.75411e-10	90.2304	33410.1	2501085	20 (12 1 5 1 1)
VPP1_HUMAN Vacuolar proton translocating ATPase 116 kDa subunit a isoform 1 (	5.39034e-05	90.1576	96350.3	59803038	12 (9 0 1 0 2)
MACF4_HUMAN Microtubule-actin cross-linking factor 1, isoform 4	5.04078e-06	90.1201	669743	30316105	27 (9 8 6 2 2)
chaperonin [Homo sapiens]	0.000224394	86.1448	61016.5	31542947	9 (8 0 1 0 0)
ubiquitin-activating enzyme E1 [Homo sapiens]	2.88055e-11	84.2044	117774	23510338	10 (7 2 1 0 0)
VDAC2 [Homo sapiens]	6.36169e-11	82.2457	30393	48146045	16 (13 2 1 0 0)
dihydropyrimidinase-like 2 [Homo sapiens]	2.94909e-08	80.2156	62254.7	4503377	14 (14 0 0 0 0)
heat shock protein 90kDa alpha (cytosolic), class A member 1 isoform 2	1.28037e-10	80.2151	84620.7	40254816	12 (8 2 0 2 0)
calcium/calmodulin-dependent protein kinase IIB isoform 8 [Homo sapien	9.88552e-08	80.1791	50923	26051218	12 (12 0 0 0 0)
glucose phosphate isomerase [Homo sapiens]	8.65917e-07	80.1446	63107.3	18201905	11 (9 0 1 1 0)
myelin basic protein isoform 1 [Homo sapiens]	3.2935e-07	78.1932	21480	68509930	22 (16 3 2 1 0)
proteolipid protein [Rattus norvegicus]	3.96651e-05	72.1645	30057.1	13591880	25 (22 1 1 0 1)
unnamed protein product [Homo sapiens]	5.63833e-06	72.15	57919.5	28940	11 (8 2 0 1 0)
ATP synthase, H+ transporting, mitochondrial F1 complex, gamma subu	0.00347611	72.1144	32975.3	50345988	13 (9 1 1 1 1)
tubulin, alpha 1B [Mus musculus]	8.72829e-08	70.2291	50119.6	34740335	39 (38 1 0 0 0)
unnamed protein product [Homo sapiens]	6.79409e-07	70.162	35738.8	32486	8 (7 1 0 0 0)
ubiquinol-cytochrome c reductase core protein II [Homo sapiens]	1.85307e-09	68.1736	48412.9	50592988	8 (7 1 0 0 0)
GNAO2_HUMAN Guanine nucleotide-binding protein G(o) subunit alpha 2	5.60448e-09	68.1713	40061.1	60416433	14 (11 2 0 0 1)
tyrosine 3/tryptophan 5 -monooxygenase activation protein, zeta polypep	5.56178e-09	66.2196	27727.7	4507953	20 (17 2 1 0 0)
unnamed protein product [Homo sapiens]	4.49285e-08	64.1944	49811	10433717	24 (11 7 6 0 0)
isocitrate dehydrogenase (NADP+) [Homo sapiens]	3.32476e-05	64.154	50915.9	872121	9 (6 1 2 0 0)
AT2B4_HUMAN Plasma membrane calcium-transporting ATPase 4 (PMCA4) (Plasma mem	0.000117453	64.143	137833	14286105	8 (7 0 0 1 0)
synapsin I isoform Ia [Homo sapiens]	8.68798e-07	64.1416	74065.8	19924099	8 (4 1 2 1 0)
KIAA0820 protein [Homo sapiens]	1.81223e-10	62.2685	99887.1	20521666	20 (5 14 1 0 0)
guanine nucleotide-binding protein, beta-2 subunit [Mus musculus]	1.26404e-05	62.154	37307.1	13937391	9 (8 0 0 0 1)
Na+/K+ -ATPase beta 1 subunit isoform a [Homo sapiens]	2.35529e-06	60.1894	35038.9	4502277	9 (9 0 0 0 0)
A Chain A, Crystal Structure Of Constant Regulatory Domain Of Human Pp2a, Pr65a	6.90185e-09	60.164	65136.1	4558258	8 (5 2 0 1 0)
histone H2B [Homo sapiens]	1.05172e-08	58.245	13927.6	1568557	9 (8 1 0 0 0)
ATRB actin, skeletal muscle - rabbit	1.43844e-07	58.1972	41789.8	71611	22 (11 5 2 3 1)
S68466 translation elongation factor EF-Tu-like protein P43 precursor, mitochondria	1.68802e-07	56.2132	49502.2	7443384	6 (5 0 1 0 0)
tubulin, beta 2 [Homo sapiens]	4.85599e-10	56.1959	49875	4507729	32 (25 3 2 1 1)
ubiquinol-cytochrome c reductase core protein I [Homo sapiens]	4.40922e-08	56.1904	52612.5	46593007	8 (4 2 1 1 0)
amyotrophic lateral sclerosis 2 [Homo sapiens] [MAS	0.00820511	54.1025	101368	12862664	10 (5 1 2 0 2)
glutamate transporter [Homo sapiens]	6.89295e-09	52.2461	61664.6	488752	13 (8 1 0 2 2)
synaptosomal-associated protein 25 isoform SNAP25A [Homo sapiens]	2.59016e-10	52.2083	23321.2	18765733	8 (7 0 0 0 1)
voltage-dependent anion channel 3 [Homo sapiens]	2.13762e-06	52.179	30639.3	25188179	7 (4 1 0 1 1)
solute carrier family 25 (mitochondrial carrier; adenine nucleotide tr	1.94655e-07	52.1422	33043.2	55749577	6 (5 0 0 0 1)
CE152_HUMAN Centrosomal protein of 152 kDa (Cep152 protein)	0.0063419	50.1736	147252	62286590	20 (2 2 11 4 1)
dynactin 1 isoform 1 [Homo sapiens]	0.00609257	50.1565	141607	13259510	11 (3 0 3 3 2)
H4 histone family, member A [Homo sapiens]	7.59905e-05	50.1519	11360.4	4504301	10 (9 0 0 0 1)
ATPase, Ca++ transporting, cardiac muscle, slow twitch 2 isoform 1 [Ho	4.60265e-08	48.2025	114683	24638454	6 (4 0 1 0 1)
collapsin response mediator protein 1 isoform 2 [Homo sapiens]	6.57687e-08	48.1629	62144.8	4503051	8 (5 3 0 0 0)
phosphoglycerate mutase 1 (brain) [Homo sapiens]	3.1979e-07	46.1807	28785.8	4505753	8 (7 0 1 0 0)
tubulin polymerization promoting protein [Homo sapiens]	3.14838e-10	46.1626	23679.2	5902018	7 (5 0 0 1 1)
tubulin, alpha-like 3 [Homo sapiens]	1.33937e-06	46.1469	49876.8	13376181	17 (15 0 2 0 0)
KIAA1389 protein [Homo sapiens]	0.00877767	46.0836	167428	7243159	8 (2 4 1 1 0)
aconitase 2 precursor [Homo sapiens]	5.72875e-13	44.1993	85372	4501867	5 (4 0 0 1 0)
tenascin-R [Homo sapiens]	2.15702e-05	44.1858	149479	1617316	5 (3 1 1 0 0)
phosphoglycerate mutase family 3 [Homo sapiens]	0.00367429	44.1322	28758.8	71274132	8 (5 2 1 0 0)
SCRN1_HUMAN Secernin-1	0.00396684	44.0808	46352.6	30923294	8 (3 1 1 1 2)
glyceraldehyde-3-phosphate dehydrogenase [Homo sapiens]	5.07162e-13	42.2325	36030.4	7669492	22 (17 2 1 0 2)
cofilin 1 (non-muscle) [Homo sapiens]	4.11404e-07	42.2206	18490.7	5031635	5 (3 1 0 1 0)
heterogeneous nuclear ribonucleoprotein A2/B1 isoform A2 [Homo sapiens]	1.4739e-08	42.1583	35983.8	4504447	6 (4 0 0 0 2)
growth associated protein 43 [Homo sapiens]	1.23056e-05	42.1575	24787.9	4503911	5 (4 0 0 0 1)
phosphofructokinase, platelet [Homo sapiens]	1.07879e-09	40.2313	85541.6	11321601	4 (4 0 0 0 0)
guanine nucleotide-binding protein, beta-1 subunit [Mus musculus]	1.86765e-05	40.1859	37353	6680045	7 (6 0 0 0 1)
R Chain R, Twinning In Crystals Of Human Skeletal Muscle D- Glyceraldehyde-3-Pho	1.89116e-07	40.1721	35853.3	230867	7 (3 2 1 0 1)
tyrosine 3/tryptophan 5 -monooxygenase activation protein, theta polype	6.77274e-07	40.1596	27746.8	5803227	14 (14 0 0 0 0)
N Chain N, Mutant Monomer Of Recombinant Human Hexokinase Type I Complexed With	2.7045e-08	40.1528	102383	7245424	5 (5 0 0 0 0)
phosphoglycerate mutase 2 (muscle) [Homo sapiens] [M	2.57123e-05	40.1471	28201.4	51094513	7 (6 0 1 0 0)
triosephosphate isomerase 1 [Homo sapiens]	1.85071e-06	40.1277	26652.7	4507645	4 (4 0 0 0 0)
DCLK1_HUMAN Serine/threonine-protein kinase DCLK1 (Doublecortin-like and CAM k	4.02703e-09	40.1187	82173	6225242	4 (4 0 0 0 0)
JN0908 H+-exporting ATPase (EC 3.6.3.6) chain D, vacuolar - human	0.00030313	40.1141	31683.9	542837	4 (4 0 0 0 0)
H3 histone, family 3A [Homo sapiens]	0.00137472	40.1125	15318.5	4504279	10 (6 2 0 0 2)
novel protein similar to human chromodomain helicase DNA binding protei	0.00264603	40.0727	194514	94733808	11 (4 1 3 2 1)
gelsolin isoform a precursor [Homo sapiens]	0.000200325	38.1736	85644.2	4504165	4 (3 1 0 0 0)
dihydrolipoamide dehydrogenase precursor [Homo sapiens]	5.2236e-08	38.1702	54143.1	91199540	4 (3 1 0 0 0)
KIAA0338 [Homo sapiens]	6.67743e-05	38.1511	103516	2224617	7 (1 1 1 3 1)
dedicator of cytokinesis 1 [Homo sapiens]	0.00347635	38.1033	215238	4503355	6 (2 1 0 2 1)
BCL2-associated transcription factor 1 isoform 1 [Homo sapiens]	0.00239396	38.1009	106059	7661958	6 (2 1 1 0 2)
75 kDa subunit NADH dehydrogenase precursor [Homo sapiens]	2.73319e-06	36.1912	79522.6	38079	6 (3 1 1 1 0)
peptidylprolyl isomerase A [Mus musculus]	4.00306e-09	36.1601	17959.8	6679439	6 (4 1 1 0 0)
MBB1A_HUMAN Myb-binding protein 1A	0.00319925	36.1485	148761	71153825	6 (1 1 2 1 1)
solute carrier family 17, member 7 [Homo sapiens]	0.00573242	36.1316	61573.3	9945322	4 (3 0 1 0 0)
spectrin, beta, non-erythrocytic 2 [Homo sapiens]	0.00157142	36.1016	271125	5902122	8 (1 1 4 1 1)
succinate-CoA ligase, ADP-forming, beta subunit [Homo sapiens]	0.00715014	36.091	50285.3	11321583	4 (3 0 1 0 0)
sarco/endoplasmic reticulum Ca2+ -ATPase [Homo sapiens]	1.53635e-09	34.2035	112442	3021396	5 (2 0 2 0 1)
KIAA1708 [Homo sapiens]	0.00184043	34.1522	185022	30725047	5 (2 0 1 2 0)
calcium/calmodulin-dependent protein kinase II gamma isoform 1 [Mus mu	3.21719e-05	34.1231	59569.4	75991700	5 (2 0 2 0 1)
de-ubiquitinase [Homo sapiens]	0.000515573	34.0944	95683.4	1122278	4 (2 1 1 0 0)
ANR11_HUMAN Ankyrin repeat domain-containing protein 11 (Ankyrin repeat-conta	0.00658998	34.0943	297885	50400336	5 (0 4 0 0 1)
RPGF2_HUMAN Rap guanine nucleotide exchange factor 2 (Neural RAP guanine nucl	0.00424338	34.0741	167312	34395737	7 (0 1 2 3 1)
protein kinase C, alpha [Homo sapiens]	1.87818e-10	32.2072	76714.2	4506067	4 (2 1 0 1 0)
DPYL4_HUMAN Dihydropyrimidinase-related protein 4 (DRP-4) (Collapsin response	0.000822166	32.1837	61838.5	68067941	7 (3 3 1 0 0)
S38532 protein 14-3-3 eta chain - human	0.00292091	32.1738	28172	481365	9 (4 3 0 0 2)
adaptor protein complex AP-2, mu1 [Mus musculus]	6.17631e-06	32.1612	49623.1	6753074	4 (2 1 0 1 0)
alpha-spectrin [Homo sapiens]	0.000660386	32.1521	43790.8	829111	4 (2 0 2 0 0)
trichohyalin [Homo sapiens]	0.00814675	32.1416	253776	148746195	6 (3 1 0 2 0)
heat shock 27kDa protein 1 [Homo sapiens]	8.93507e-06	32.1403	22768.5	4504517	4 (3 0 0 0 1)
SUCA_HUMAN Succinyl-CoA ligase [GDP-forming] subunit alpha, mitochondrial pre	4.0555e-05	32.1225	35025.2	20141765	4 (2 0 2 0 0)
phosphatidylinositol-4-phosphate 5-kinase type II beta [Homo sapiens]	2.96013e-06	32.1161	47347.8	4505819	4 (2 0 2 0 0)
hCG2044193 [Homo sapiens]	0.0045211	32.1089	109735	119632249	9 (3 1 1 2 2)
DEAH (Asp-Glu-Ala-Asp/His) box polypeptide 57 [Homo sapiens]	0.00304512	32.0798	155506	39777586	4 (2 1 0 1 0)
carbonyl reductase 1 [Homo sapiens]	1.0386e-07	30.2196	30355.9	4502599	3 (3 0 0 0 0)
N-ethylmaleimide sensitive fusion protein attachment protein beta [Mus	4.44089e-15	30.2154	33535.5	29789104	3 (3 0 0 0 0)
neural cell adhesion molecule 1 isoform 3 [Homo sapiens]	7.7123e-08	30.2041	83718	115529478	3 (3 0 0 0 0)
syntaxin binding protein 1 [Rattus norvegicus]	5.9798e-06	30.1868	67525.9	6981602	3 (3 0 0 0 0)
vesicle-associated membrane protein 2 (synaptobrevin 2) [Homo sapiens]	5.47025e-07	30.1813	12640.7	7657675	3 (3 0 0 0 0)
B Chain B, X-Ray Crystal Structure Of Human Galectin-1	8.55429e-08	30.1793	14575.2	42542978	3 (3 0 0 0 0)
hypothetical protein [Homo sapiens]	1.41244e-05	30.1579	110722	52545742	3 (3 0 0 0 0)
reticulon 1 isoform A [Homo sapiens]	0.000191814	30.1499	83566.2	10863935	4 (2 0 1 1 0)
Cytochrome c oxidase subunit Va [Homo sapiens]	9.46411e-06	30.145	16751.7	18999392	5 (5 0 0 0 0)
K1045_HUMAN Protein KIAA1045	8.34162e-05	30.1172	45163.4	73621116	4 (2 1 0 0 1)
AP1B1_HUMAN AP-1 complex subunit beta-1 (Adapter-related protein complex 1 bet	0.000296248	30.1063	104540	1703167	3 (3 0 0 0 0)
cytochrome c-1 [Homo sapiens]	0.0011864	30.106	35367	21359867	5 (1 1 1 1 1)
KIAA1555 protein [Homo sapiens]	0.000930699	30.1039	260133	29421200	5 (1 1 1 1 1)
A30802 Ca2+-transporting ATPase (EC 3.6.3.8) 2, plasma membrane - human	0.00266813	30.1008	134625	86988	5 (2 0 1 0 2)
KIAA2017 protein [Homo sapiens]	0.00115181	30.0977	349280	71891721	5 (1 1 1 1 1)
KIAA0045 [Homo sapiens]	0.00418819	30.0856	221851	40788945	4 (1 1 2 0 0)
Manganese superoxide dismutase [Homo sapiens]	0.00669259	28.1111	24694.5	34707	3 (2 1 0 0 0)
integrin alpha M precursor [Homo sapiens]	0.00714485	28.1071	127099	88501734	5 (0 1 2 2 0)
adenomatosis polyposis coli 2 [Homo sapiens]	0.00111426	28.1063	243796	5031587	5 (0 3 2 0 0)
smg GDS [Homo sapiens]	0.00260664	28.1045	61084.2	32080	3 (2 1 0 0 0)
chondroitin sulfate glucuronyltransferase [Homo sapiens]	0.00715974	28.101	85094	51105925	7 (2 1 3 1 0)
solute carrier family 25 member 3 isoform a precursor [Homo sapiens]	0.00309608	28.0967	40068.8	6031192	3 (2 1 0 0 0)
ZN513_HUMAN Zinc finger protein 513	0.00370282	28.0561	50995.2	55976742	4 (1 1 1 1 0)
hypothetical protein LOC256643 [Homo sapiens]	0.00318359	28.0489	80346.3	115511057	3 (2 1 0 0 0)
alpha SNAP [Homo sapiens]	8.49361e-13	26.248	33225.3	3929617	4 (3 0 1 0 0)
limbic system-associated membrane protein [Homo sapiens]	1.94237e-09	26.2345	37370.2	45594240	3 (2 0 1 0 0)
NADH dehydrogenase (ubiquinone) 1 alpha subcomplex, 8, 19kDa [Homo sapi	0.00024972	26.1815	20092.1	7657369	3 (2 0 1 0 0)
ODP2_HUMAN Dihydrolipoyllysine-residue acetyltransferase component of pyruvate	1.06099e-07	26.1381	65739.4	3915777	3 (2 0 1 0 0)
heavy neurofilament subunit [Homo sapiens]	0.000245102	26.1352	111713	1841430	3 (2 0 1 0 0)
Protein involved in transcription-coupled repair nucleotide excision re	0.00952406	26.1191	124451	6322495	5 (1 2 1 1 0)
RAR-related orphan receptor C isoform b [Homo sapiens]	0.00405814	26.0858	55777	48255918	4 (1 2 0 0 1)
excitatory amino acid transporter 2 [Homo sapiens]	1.79263e-07	24.2336	62063.9	40254478	4 (3 0 0 1 0)
platelet-activating factor acetylhydrolase, isoform Ib, alpha subunit (	0.000329095	24.1522	46608.2	4557741	4 (3 0 0 1 0)
glutamate dehydrogenase (NAD(P)+) [Homo sapiens]	0.000544972	24.128	61394.6	31815	4 (2 1 1 0 0)
zinc finger protein 442 [Homo sapiens]	0.00190581	24.1144	72815.7	13540501	6 (1 2 2 0 1)
sperm associated antigen 17 [Homo sapiens]	0.00834386	24.1077	251582	46240864	4 (1 0 1 2 0)
KIAA1404 protein [Homo sapiens]	0.0080906	24.1076	220836	7243189	3 (1 1 1 0 0)
pyridoxal kinase [Homo sapiens]	3.75506e-06	24.1048	35079.9	4505701	3 (2 0 0 1 0)
F-box only protein 2 [Homo sapiens]	0.000441744	24.1032	33306.8	15812198	3 (2 0 0 1 0)
guanine nucleotide binding protein-like 2 (nucleolar) [Homo sapiens]	0.00569551	24.1025	83603.4	7019419	5 (1 0 1 1 2)
ras-related C3 botulinum toxin substrate 1 isoform Rac1 [Homo sapiens]	0.00347762	24.0992	21436.2	9845511	5 (2 0 1 0 2)
hCG1776789, isoform CRA_a [Homo sapiens]	0.000310051	24.0964	117070	119590707	3 (0 3 0 0 0)
hypothetical protein [Homo sapiens]	0.00293324	24.0956	178179	31874848	6 (4 1 0 1 0)
niban protein isoform 2 [Homo sapiens]	0.00236301	24.0937	103070	16757970	4 (1 0 2 0 1)
tumor necrosis factor (ligand) superfamily, member 10 [Homo sapiens]	0.00215764	24.0931	32488.1	4507593	3 (1 1 1 0 0)
glutathione synthetase [Homo sapiens]	0.00464006	24.093	52352.4	4504169	4 (0 2 1 0 1)
hypothetical protein [Homo sapiens]	0.00426185	24.0865	180386	6807915	4 (1 0 2 0 1)
CF152_HUMAN Uncharacterized protein C6orf152	0.00183501	24.0822	80505.3	71658798	3 (1 1 1 0 0)
KIF5A variant protein [Homo sapiens]	0.00397372	24.0798	118429	68533145	6 (0 0 2 2 2)
KIAA0335 [Homo sapiens]	0.00335687	24.0778	166788	20521003	3 (1 1 1 0 0)
epidermal growth factor receptor pathway substrate 8 [Homo sapiens]	0.00162526	24.0761	91824.5	56682953	6 (1 2 0 0 3)
aquaporin 4 isoform a [Homo sapiens]	0.0014596	24.076	34806.9	4502181	3 (2 0 0 1 0)
calnexin precursor [Homo sapiens]	0.00809133	24.0691	67526	10716563	4 (1 1 1 1 0)
hypothetical protein [Homo sapiens]	0.000444726	24.0535	257060	20177371	3 (1 1 1 0 0)
tubulin, beta, 2 [Homo sapiens]	4.49285e-08	22.1943	49799	5174735	18 (6 5 7 0 0)
ras-related GTP-binding protein RAB10 [Homo sapiens]	8.45838e-07	22.192	22454.6	33695095	3 (1 0 2 0 0)
TAFII140 protein [Homo sapiens]	0.00428652	22.1886	81621.6	13374079	22 (0 11 8 2 1)
cAMP-dependent protein kinase, regulatory subunit beta 2 [Homo sapiens	0.000126182	22.1849	46273	47132585	3 (1 1 0 1 0)
SHPS1_HUMAN Tyrosine-protein phosphatase non-receptor type substrate 1 precur	9.0224e-07	22.1835	54778.7	29427656	3 (2 0 0 0 1)
AT12A_HUMAN Potassium-transporting ATPase alpha chain 2 (Proton pump) (Non-ga	3.20199e-06	22.1506	115825	20141250	4 (3 0 0 0 1)
envelope glycoprotein [Human immunodeficiency virus type 1]	0.00969791	22.1206	10561.1	4205461	3 (1 1 0 1 0)
guanine nucleotide-binding protein, beta-3 subunit [Homo sapiens]	0.00110709	22.1114	37196.9	4504053	5 (0 4 1 0 0)
S27954 leucine-rich protein - human	6.09652e-05	22.1107	137330	284289	3 (2 0 0 0 1)
DNA ligase IV [Homo sapiens]	0.00363123	22.0921	96093.1	860937	4 (0 2 0 1 1)
hCG1982595 [Homo sapiens]	0.00348793	22.089	30643.4	119605632	3 (0 2 1 0 0)
hypothetical protein [Homo sapiens]	0.00602605	22.0871	81726.8	5262568	4 (0 1 1 2 0)
dynamin 2 isoform 1 [Homo sapiens]	0.00201134	22.0743	98003.3	56549121	3 (1 1 0 1 0)
cyclin-dependent kinase inhibitor 2A isoform 4 [Homo sapiens]	0.00946966	22.068	17994.7	17738294	5 (2 1 1 1 0)
synaptotagmin I [Homo sapiens]	2.15301e-09	20.2911	47542.8	5032139	2 (2 0 0 0 0)
unnamed protein product [Homo sapiens]	1.979e-08	20.2268	10747.9	32101	2 (2 0 0 0 0)
SYN2_HUMAN Synapsin-2 (Synapsin II)	1.5775e-07	20.2194	62928.8	6686022	2 (2 0 0 0 0)
COX41_PANTR Cytochrome c oxidase subunit 4 isoform 1 (Cytochrome c oxidase sub	2.38032e-12	20.2092	16851.6	5921895	2 (2 0 0 0 0)
cysteine and glycine-rich protein 1 [Homo sapiens]	5.83233e-11	20.1968	20553.8	4758086	2 (2 0 0 0 0)
Thy-1 cell surface antigen [Homo sapiens]	1.12771e-07	20.1814	17923.3	19923362	6 (6 0 0 0 0)
guanine nucleotide binding protein, alpha activating polypeptide O [Ho	6.59009e-05	20.1805	40024.9	10567816	3 (3 0 0 0 0)
creatine kinase, mitochondrial 1B precursor [Homo sapiens]	2.86883e-07	20.1673	47007.3	10334859	2 (2 0 0 0 0)
CD59 antigen p18-20 [Homo sapiens]	2.91185e-09	20.1656	14167.8	10835165	2 (2 0 0 0 0)
unnamed protein product [Homo sapiens]	1.85018e-07	20.1634	31292.4	7020000	2 (2 0 0 0 0)
A Chain A, Human Prion Protein	7.74398e-08	20.1602	22876.6	6730485	3 (3 0 0 0 0)
beta actin [Homo sapiens]	5.5517e-08	20.1596	41709.7	4501885	5 (5 0 0 0 0)
alanyl-tRNA synthetase [Homo sapiens]	2.62704e-08	20.1566	106734	1015321	2 (2 0 0 0 0)
hypothetical protein [Homo sapiens]	3.08525e-06	20.1552	56862.2	12225000	2 (2 0 0 0 0)
unnamed protein product [Homo sapiens]	0.000397303	20.147	54221.2	22760572	3 (2 0 0 1 0)
KIAA1176 protein [Homo sapiens]	0.000165318	20.1431	121738	6330233	2 (2 0 0 0 0)
cytochrome C oxidase II subunit [Homo sapiens]	2.23025e-05	20.1418	20980.9	14016	2 (2 0 0 0 0)
WD repeat-containing protein 1 isoform 1 [Homo sapiens]	0.00251689	20.1285	66151.9	9257257	3 (1 0 1 1 0)
sideroflexin 1 [Homo sapiens]	4.35339e-05	20.1246	35596.3	23618867	2 (2 0 0 0 0)
tubulin, alpha 4 [Mus musculus]	4.3395e-08	20.124	49892.4	6678467	6 (6 0 0 0 0)
NKX61_HUMAN Homeobox protein Nkx-6.1	0.00221392	20.121	37825.1	6016211	3 (2 1 0 0 0)
A33639 6-phosphofructokinase (EC 2.7.1.11), hepatic - human [MA	0.000510266	20.12	85074.3	105155	4 (1 0 1 2 0)
isocitrate dehydrogenase 3 (NAD+) gamma isoform a precursor [Homo sapie	6.50038e-07	20.1162	42767.1	4758582	2 (2 0 0 0 0)
prohibitin [Homo sapiens]	0.000340327	20.1152	29785.9	4505773	3 (2 0 0 0 1)
guanine nucleotide binding protein (G protein), alpha inhibiting activi	0.00201597	20.1135	40425.1	4504041	2 (2 0 0 0 0)
KIAA1670 protein [Homo sapiens]	0.00355455	20.1106	68221	13359213	3 (1 1 0 0 1)
ATPase, Ca++ transporting, fast twitch 1 isoform a [Homo sapiens]	0.000305871	20.1097	110182	27886529	3 (3 0 0 0 0)
phosphoglycerate dehydrogenase [Homo sapiens]	0.00836523	20.1094	56614.5	23308577	2 (2 0 0 0 0)
hCG201417 [Homo sapiens]	0.000525416	20.1087	23658.7	119594542	5 (2 1 1 1 0)
protein (peptidyl-prolyl cis/trans isomerase) NIMA-interacting 1 [Homo	6.84625e-08	20.1069	18232	5453898	2 (2 0 0 0 0)
KIAA1500 protein [Homo sapiens]	1.13345e-05	20.1059	249899	29421198	4 (1 0 1 0 2)
unnamed protein product [Homo sapiens]	0.00107642	20.1057	46800.1	21753491	2 (2 0 0 0 0)
HESB like domain containing 1 [Homo sapiens]	0.00390009	20.1027	16413.1	34996487	3 (3 0 0 0 0)
KIAA0543 protein [Homo sapiens]	0.00551565	20.0935	125030	3043610	7 (0 1 1 2 3)
unnamed protein product [Homo sapiens]	0.00801416	20.0875	150637	34534829	5 (0 1 0 4 0)
heat shock 70kDa protein 9B precursor [Homo sapiens]	0.00361625	20.0829	73634.8	24234688	2 (2 0 0 0 0)
DEAD (Asp-Glu-Ala-Asp) box polypeptide 1 [Homo sapiens]	0.00154858	20.0808	82379.9	4826686	2 (2 0 0 0 0)
hypothetical protein LOC151963 [Homo sapiens]	0.00628534	20.0798	55505.3	30794270	3 (3 0 0 0 0)
ZSC29_HUMAN Zinc finger and SCAN domain-containing protein 29 (Zinc finger pr	0.00644224	20.0779	96527.6	74759644	4 (0 2 0 0 2)
unnamed protein product [Homo sapiens]	0.0030703	20.0773	56915.9	18676759	3 (0 1 2 0 0)
oxoglutarate dehydrogenase-like [Homo sapiens]	0.00037421	20.0733	114407	8922716	4 (1 1 0 1 1)
PCSK7_HUMAN Proprotein convertase subtilisin/kexin type 7 precursor (Proprote	0.0014315	20.0719	86192.6	12643731	2 (2 0 0 0 0)
hypothetical protein [Homo sapiens]	0.00586613	20.0708	113485	31874640	3 (0 2 0 1 0)
KIAA0476 protein [Homo sapiens]	0.00322653	20.0697	177328	71891699	2 (2 0 0 0 0)
envelope glycoprotein gp120 [Human immunodeficiency virus type 1]	0.00791953	20.0687	57920.5	902567	2 (2 0 0 0 0)
human Mi-2 autoantigen-like protein [Arabidopsis thaliana]	2.91141e-05	20.0667	248368	2660669	4 (0 1 1 1 1)
oncogene [Homo sapiens]	0.00631435	20.0667	121806	37334	3 (1 1 0 0 1)
CXXC6_HUMAN CXXC-type zinc finger protein 6 (Leukemia-associated protein wit	0.00756773	20.0592	235160	115502139	2 (2 0 0 0 0)
human PGP 9.5 homologue [cattle, Peptide Partial, 25 aa]	1.01537e-05	18.2223	2810.49	236733	3 (1 2 0 0 0)
heat shock protein 90Bb [Homo sapiens]	5.7554e-09	18.2128	49091.8	61104911	3 (1 0 1 0 1)
syntaxin 1B2 [Rattus norvegicus]	3.49805e-07	18.1963	33223.8	6981600	4 (2 0 0 2 0)
ankyrin B (440 kDa) [Homo sapiens]	1.83829e-06	18.172	429876	4803663	2 (1 1 0 0 0)
eukaryotic translation elongation factor 1 alpha 2 [Homo sapiens]	1.55469e-07	18.1698	50438.4	4503475	4 (2 0 0 2 0)
adenylyl cyclase-associated protein 2 [Homo sapiens]	5.29167e-08	18.1601	52790.9	5453593	2 (1 1 0 0 0)
TBB4Q_HUMAN Tubulin beta-4q chain	5.1773e-09	18.1529	48403.5	12643363	6 (3 3 0 0 0)
DLG4_HUMAN Discs large homolog 4 (Postsynaptic density protein 95) (PSD-95) (	3.98747e-07	18.1295	80445.9	71658825	2 (1 1 0 0 0)
proteoglycan PG-M(V3) [Homo sapiens]	0.00109648	18.129	74200.6	1008913	2 (1 1 0 0 0)
protein kinase C, theta [Homo sapiens]	0.000594255	18.1254	81810.8	5453976	4 (0 1 1 0 2)
beta tubulin 1, class VI [Homo sapiens]	0.0002971	18.1114	50294.6	13562114	7 (2 1 1 2 1)
ATP synthase, H+ transporting, mitochondrial F1 complex, beta subunit	0.000365216	18.111	56524.7	32189394	7 (2 4 1 0 0)
zinc finger protein 699 [Homo sapiens]	0.00119137	18.1064	73907.3	110626177	2 (1 1 0 0 0)
CP1B1_HUMAN Cytochrome P450 1B1 (CYPIB1)	0.000831078	18.1024	60807.4	48429256	2 (1 1 0 0 0)
B-cell CLL/lymphoma 11B isoform 2 [Homo sapiens]	0.003755	18.1018	88420.5	12597635	4 (0 0 4 0 0)
3-oxoacid CoA transferase 1 precursor [Homo sapiens]	0.00228946	18.1	56122	4557817	2 (1 1 0 0 0)
RP3A_HUMAN Rabphilin-3A (Exophilin-1)	8.32212e-05	18.0953	76824.3	13878745	3 (1 0 1 0 1)
ATP synthase, H+ transporting, mitochondrial F0 complex, subunit F6 is	0.00101256	18.0941	12579.6	18644883	2 (1 1 0 0 0)
envelope glycoprotein [Human immunodeficiency virus 1]	0.000990017	18.0925	95369.9	82571413	2 (1 1 0 0 0)
KIAA0173 [Homo sapiens]	0.00383802	18.0909	133664	40788896	3 (0 1 1 1 0)
pyruvate dehydrogenase (lipoamide) beta [Homo sapiens]	0.00105004	18.0905	39224.1	4505687	3 (1 0 0 2 0)
SEC14 cytosolic factor family protein / phosphoglyceride transfer fami	0.00220869	18.0814	36131.9	30687745	2 (1 1 0 0 0)
coiled-coil domain containing 55 isoform 1 [Homo sapiens]	0.00542725	18.0792	66350.1	14149807	6 (0 0 4 1 1)
hCG1817914, isoform CRA_a [Homo sapiens]	0.000756904	18.0762	174063	119571393	2 (1 1 0 0 0)
KIAA1507 protein [Homo sapiens]	0.00337169	18.0762	98441.2	7959275	3 (0 0 3 0 0)
D-2-hydroxyglutarate dehydrogenase precursor [Homo sapiens]	5.08166e-05	18.0728	56380.3	119964728	3 (1 0 1 0 1)
ZFY16_HUMAN Zinc finger FYVE domain-containing protein 16 (Endofin) (Endosome	0.00201587	18.0698	168742	50401753	2 (1 1 0 0 0)
MBC3205, isoform CRA_d [Homo sapiens]	0.00438357	18.0601	12109.4	119604602	2 (1 1 0 0 0)
hCG2045392 [Homo sapiens]	0.00522027	18.0584	14373.1	119598541	2 (1 1 0 0 0)
KIAA1091 protein [Homo sapiens]	0.0078095	18.0563	153598	5689519	2 (1 1 0 0 0)
PCCA_HUMAN Propionyl-CoA carboxylase alpha chain, mitochondrial precursor (PCC	0.00379741	18.0557	77304.8	6174892	2 (1 1 0 0 0)
unnamed protein product [Homo sapiens]	0.00741203	18.0539	47521.6	47077361	2 (1 1 0 0 0)
AF484480_7 envelope glycoprotein [Human immunodeficiency virus 1]	0.00122096	18.0538	96837.5	25166665	2 (1 1 0 0 0)
SNX30_HUMAN Sorting nexin-30	0.00899025	18.0532	49645.2	74747407	2 (1 1 0 0 0)
unnamed protein product [Homo sapiens]	0.00646453	18.0529	111707	47076999	2 (1 1 0 0 0)
polyprotein [Human coxsackievirus A4]	0.00886764	18.0367	244433	40068433	2 (1 1 0 0 0)
A55877 tumor necrosis factor type 1 receptor associated protein TRAP-1 - human	0.000180523	16.2092	75295	1082886	3 (1 1 1 0 0)
A45036 single-stranded-DNA-binding protein Pur alpha - human [MA	4.36935e-05	16.1796	34948.5	346338	2 (1 0 1 0 0)
AF142498_1 14-3-3 gamma protein [Homo sapiens]	0.000254187	16.156	28356.8	5726310	2 (0 2 0 0 0)
hypothetical protein LOC283450 [Homo sapiens]	0.0021655	16.1487	73057.9	27902289	4 (0 2 1 0 1)
unnamed protein product [Homo sapiens]	0.00703905	16.1442	60903.9	16549132	5 (1 1 1 1 1)
cytochrome c oxidase subunit VIb [Homo sapiens]	3.96628e-10	16.1435	10185.7	4502985	3 (2 0 1 0 0)
protein kinase C, gamma [Homo sapiens]	5.55307e-06	16.1425	78397.3	13384594	2 (1 0 1 0 0)
heterogeneous nuclear ribonucleoprotein H2 [Homo sapiens]	1.99373e-06	16.1243	49232.3	9624998	4 (1 1 0 1 1)
Bloom syndrome protein [Homo sapiens]	0.00228829	16.1237	158900	4557365	4 (2 0 2 0 0)
GPR83_HUMAN Probable G-protein coupled receptor 83 precursor (G-protein coupl	0.000294189	16.118	48239.3	13878517	2 (0 2 0 0 0)
apoptotic cysteine protease Mch5 isoform alpha	0.0085184	16.1132	57685.9	1401352	2 (1 0 1 0 0)
COQ4_HUMAN Ubiquinone biosynthesis protein COQ4 homolog (Coenzyme Q biosynthe	0.00580756	16.113	29652.7	24211604	3 (1 1 1 0 0)
ZSWM6_HUMAN Zinc finger SWIM domain-containing protein 6	0.00362087	16.1051	84042	41018480	2 (1 0 1 0 0)
COG3_HUMAN Conserved oligomeric Golgi complex component 3 (Vesicle docking pr	0.00701238	16.1046	94036.4	85701302	3 (0 2 1 0 0)
hCG2042704 [Homo sapiens]	0.00695505	16.1026	17449.9	119570900	4 (2 0 1 1 0)
GSLG1_HUMAN Golgi apparatus protein 1 precursor (Golgi sialoglycoprotein MG-1	0.00474938	16.0947	134504	17376711	4 (0 1 0 1 2)
EGL nine (C.elegans) homolog 2 [Homo sapiens]	0.00116212	16.0947	43622.8	16604260	3 (1 0 0 1 1)
USP9X_HUMAN Probable ubiquitin carboxyl-terminal hydrolase FAF-X (Ubiquitin t	0.00276292	16.0816	289355	81175100	3 (1 0 0 1 1)
KIAA1736 protein [Homo sapiens]	0.00971466	16.0805	136142	12698017	3 (0 1 0 2 0)
thyroid receptor-interacting protein 6 [Homo sapiens]	0.000652432	16.0787	50255.5	91208423	3 (1 0 1 0 1)
hCG2007439 [Homo sapiens]	0.00412271	16.0785	41611.6	119630082	3 (0 0 2 1 0)
hCG2040834 [Homo sapiens]	0.0086057	16.0785	7106.68	119588729	2 (0 2 0 0 0)
protocadherin 15 [Homo sapiens]	0.00753297	16.0761	215891	15072441	2 (1 0 1 0 0)
WW domain containing E3 ubiquitin protein ligase 2 isoform 1 [Homo sap	0.00793172	16.0741	98850.1	40806207	2 (0 2 0 0 0)
gag protein [Human immunodeficiency virus 1]	1.53896e-05	16.0737	11215.1	73913159	2 (1 0 1 0 0)
lysosomal-associated membrane protein 2 precursor [Homo sapiens]	0.00729017	16.0715	44932.3	4504957	2 (0 2 0 0 0)
unnamed protein product [Homo sapiens]	0.00112167	16.0676	115755	34533183	3 (0 1 1 0 1)
unnamed protein product [Homo sapiens]	0.00292725	16.0676	19150.6	21755889	5 (1 2 2 0 0)
microtubule-associated protein, RP/EB family, member 2 [Homo sapiens]	0.000279304	16.0674	37008.2	10346135	2 (1 0 1 0 0)
AF307849_1 sentrin-specific protease SENP6 [Homo sapiens]	0.000492299	16.0629	126066	11095320	3 (0 1 0 2 0)
Fanconi anemia, complementation group C [Homo sapiens]	0.00507561	16.0601	63387.7	56118236	3 (0 1 0 2 0)
MYST histone acetyltransferase (monocytic leukemia) 3 [Homo sapiens]	0.00955362	16.0509	224913	5803098	2 (1 0 1 0 0)
isocitrate dehydrogenase 2 (NADP+), mitochondrial precursor [Homo sapi	1.54542e-09	14.2149	50876.9	28178832	2 (1 0 0 1 0)
solute carrier family 25, member 5 [Homo sapiens]	1.71134e-09	14.1985	32874.2	4502099	3 (1 0 0 0 2)
paralemin [Homo sapiens]	6.54923e-06	14.1688	37104.5	4186043	2 (1 0 0 1 0)
hypothetical protein LOC345651 [Homo sapiens]	0.000197827	14.1591	41976	63055057	5 (0 1 2 1 1)
solute carrier family 25 (mitochondrial carrier; oxoglutarate carrier)	0.000243643	14.1569	34039.8	21361114	3 (1 0 0 1 1)
calmodulin [Homo sapiens]	0.000250602	14.1409	17152	825635	2 (1 0 0 1 0)
FLJ00027 protein [Homo sapiens]	0.00254378	14.1393	29899.8	10440383	2 (1 0 0 1 0)
unnamed protein product [Homo sapiens]	0.00342756	14.1249	63987.6	7020785	2 (1 0 0 1 0)
NADH dehydrogenase (ubiquinone) flavoprotein 1, 51kDa [Homo sapiens]	0.000253997	14.1194	50784.9	20149568	2 (1 0 0 1 0)
transketolase [Homo sapiens]	0.000994817	14.1186	67834.9	4507521	3 (1 0 0 0 2)
unnamed protein product [Homo sapiens]	0.000786199	14.1185	52406.5	21757045	2 (0 1 1 0 0)
hepatocyte growth factor-regulated tyrosine kinase substrate [Homo sapi	3.78059e-05	14.1159	86137.7	4758528	2 (1 0 0 1 0)
uveal autoantigen with coiled-coil domains and ankyrin repeats isoform	0.00205848	14.1152	162404	59850762	3 (0 1 0 1 1)
olfactory receptor, family 1, subfamily E, member 2 [Homo sapiens]	0.00842398	14.1142	36365.6	11386153	6 (1 1 0 3 1)
KIAA0160 [Homo sapiens]	0.00247189	14.0975	89907.2	1813429	3 (0 1 0 1 1)
envelope protein [Human immunodeficiency virus 1]	0.0050649	14.0971	95064.9	11124719	3 (0 0 2 0 1)
kinetochore associated 2 [Homo sapiens]	0.00176591	14.0931	73866.6	5174457	3 (1 0 1 1 0)
polypeptide N-acetylgalactosaminyltransferase 3 [Homo sapiens]	0.00253393	14.0912	72592	4758414	2 (1 0 0 1 0)
KIAA1011 protein [Homo sapiens]	0.00800027	14.091	408472	71891753	4 (0 1 0 0 3)
ubiquitin protease [Homo sapiens]	0.00194467	14.0877	108496	2459395	2 (0 1 1 0 0)
gp160 [Human immunodeficiency virus 1]	0.00689684	14.0868	32937.2	1668728	2 (0 1 1 0 0)
CBX4_HUMAN E3 SUMO-protein ligase CBX4 (Chromobox protein homolog 4) (Polycom	0.00547884	14.0851	61190.6	12585199	2 (1 0 0 1 0)
AF484489_7 envelope glycoprotein [Human immunodeficiency virus 1]	0.00324004	14.0788	96055.3	25166747	2 (0 1 1 0 0)
calcium/calmodulin-dependent protein kinase IV [Homo sapiens]	0.00117206	14.0776	51892.9	4502557	2 (1 0 0 1 0)
ANKF1_HUMAN Ankyrin repeat and fibronectin type-III domain-containing protein	0.00803238	14.0756	87562.4	74751117	3 (0 1 1 0 1)
tektin 4 [Homo sapiens]	0.00898327	14.0717	50617.3	21389613	3 (0 1 0 1 1)
NOSTN_MOUSE Nostrin (eNOS trafficking inducer) (Nitric oxide synthase traffi	0.00363928	14.0707	57636.8	148886609	2 (0 1 1 0 0)
prolactin receptor, isoform CRA_a [Homo sapiens] [	0.00718995	14.0671	25771.1	119576317	2 (0 1 1 0 0)
hyaluronan-mediated motility receptor isoform a [Homo sapiens]	0.00294066	14.0659	83979.7	7108349	3 (0 0 2 0 1)
megakaryocyte-associated tyrosine kinase isoform a [Homo sapiens]	0.00892222	14.0655	56433.2	21450846	2 (1 0 0 1 0)
contactin 6 [Homo sapiens]	0.00618516	14.0609	113885	7657361	3 (0 1 2 0 0)
transmembrane protein 39A [Homo sapiens]	0.00286849	14.0591	55631	8922756	2 (1 0 0 1 0)
envelope protein [Human papillomavirus type 10]	0.00723795	14.0559	76321	9627260	2 (0 1 1 0 0)
fas ligand [Homo sapiens]	4.77306e-05	14.0518	31464.1	4557329	2 (0 1 1 0 0)
hypothetical protein LOC390667 [Homo sapiens]	0.00462081	14.0495	51274.6	61966763	2 (0 1 1 0 0)
KIAA0678 protein [Homo sapiens]	0.00462076	14.0487	255970	71891673	2 (0 1 1 0 0)
dynamin 1-like protein isoform 1 [Homo sapiens]	5.52278e-05	12.1553	81840.3	6996005	2 (1 0 0 0 1)
amphiphysin isoform 2 [Homo sapiens]	3.84864e-06	12.1551	71885	21536423	2 (1 0 0 0 1)
hCG1747788 [Homo sapiens]	0.000584907	12.1547	14554.8	119608911	14 (0 0 13 0 1)
unnamed protein product [Homo sapiens]	2.24717e-06	12.1451	20025.1	37610	2 (1 0 0 0 1)
novel protein similar to human telomerase-associated protein 1 (TEP1) [	0.00413231	12.1192	71275.5	33284886	2 (0 1 0 1 0)
KIAA1345 protein [Homo sapiens]	0.00382321	12.1173	175742	7243071	3 (2 0 0 0 1)
envelope glycoprotein [Human immunodeficiency virus 1]	0.00463613	12.1141	11079.7	37695005	3 (0 1 0 1 1)
potassium voltage-gated channel, shaker-related subfamily, beta member	0.00147954	12.1139	39262.2	27436969	2 (1 0 0 0 1)
late protein [Human papillomavirus type 34]	0.00399298	12.1088	59010.2	9627340	3 (0 1 0 2 0)
ryanodine receptor type 3 [Homo sapiens]	0.0040245	12.1041	22952.2	405719	3 (0 2 0 1 0)
zinc finger and SCAN domain containing 10 [Homo sapiens]	0.00744395	12.1018	80336	14249488	3 (1 1 0 1 0)
envelope protein [Human immunodeficiency virus 1] [	0.0031139	12.0984	11173	1065874	3 (0 1 0 1 1)
pol protein [Human immunodeficiency virus 1]	0.000486602	12.0908	38873.5	44887423	2 (0 1 0 1 0)
fatty acid binding protein 5 (psoriasis-associated) [Homo sapiens]	0.00735138	12.0907	15154.5	4557581	2 (0 1 0 1 0)
multidrug resistance associated protein [Homo sapiens]	0.00367437	12.0879	167719	15559191	2 (0 1 0 1 0)
hCG2012440 [Homo sapiens]	0.00675689	12.087	42509.1	119591205	2 (0 1 0 1 0)
unnamed protein product [Homo sapiens]	0.00326691	12.0861	134578	14042852	2 (0 0 2 0 0)
mitogen-activated protein kinase kinase kinase kinase 1 isoform 2 [Homo	0.00118494	12.0857	91238.4	6005810	2 (0 0 2 0 0)
protocadherin beta 4 precursor [Homo sapiens]	0.00344422	12.0823	87216.5	9256616	4 (0 2 2 0 0)
pol protein [Human immunodeficiency virus 2]	0.00444688	12.0816	52909	148751050	2 (1 0 0 0 1)
KIAA1113 protein [Homo sapiens]	0.00169046	12.0809	122944	5689563	2 (0 0 2 0 0)
Rab3-interacting protein [Homo sapiens]	0.00251578	12.077	18538.1	37725414	2 (1 0 0 0 1)
FUBP2_HUMAN Far upstream element-binding protein 2 (FUSE-binding protein 2) (	0.00158987	12.076	72664	37078468	2 (1 0 0 0 1)
hypothetical protein LOC54537 [Homo sapiens]	0.0030774	12.0721	93646	148596930	3 (0 1 0 0 2)
unnamed protein product [Homo sapiens]	0.00289479	12.0705	14783.7	10432803	2 (0 1 0 1 0)
putative p150 [Homo sapiens]	0.00514394	12.0669	148940	2072958	2 (1 0 0 0 1)
unnamed protein product [Homo sapiens]	0.0021518	12.0648	20763.5	4379025	3 (0 1 0 0 2)
peripheral clock protein 2 [Homo sapiens]	0.00707799	12.0648	200341	62956001	3 (1 0 0 0 2)
metabotropic glutamate receptor	0.00117831	12.0646	101257	1477390	4 (0 0 0 2 2)
PDZ domain containing 7 [Homo sapiens]	0.00396313	12.0602	55642.3	13376349	2 (0 1 0 1 0)
large tegument protein [Human herpesvirus 2]	0.00788896	12.06	329846	9629306	2 (0 1 0 1 0)
U42 [Human herpesvirus 7]	0.00928825	12.0587	60484.2	51874264	2 (0 1 0 1 0)
unnamed protein product [Homo sapiens]	0.00996348	12.0585	50569.9	10432847	2 (0 0 2 0 0)
p21-activated kinase 4 isoform 1 [Homo sapiens]	0.000542189	12.0581	64032.3	5031975	2 (1 0 0 0 1)
factor H [Homo sapiens]	0.000572678	12.0548	139033	31965	2 (0 0 2 0 0)
N-deacetylase/N-sulfotransferase (heparan glucosaminyl) 2 [Homo sapiens	0.00960355	12.0543	100811	4505353	2 (1 0 0 0 1)
optic atrophy 1 [Danio rerio]	0.00906671	12.049	111263	55925512	2 (0 0 2 0 0)
tubulin, alpha 1a [Mus musculus]	9.86514e-08	10.2186	49927.7	6678465	8 (6 0 1 0 1)
Ca2+-dependent secretion activator isoform 1 [Homo sapiens]	1.58758e-06	10.2077	152689	34452715	1 (1 0 0 0 0)
H+-ATP synthase subunit b [Homo sapiens]	3.94573e-12	10.2045	28876.3	509291	1 (1 0 0 0 0)
ATPase, H+ transporting, lysosomal, V0 subunit c [Homo sapiens]	3.58032e-06	10.1975	15725.5	4502313	3 (2 0 0 1 0)
Chain , Human Complement Regulatory Protein Cd59 (Extracellular Region, Resid	2.69186e-08	10.1962	8080.61	515118	1 (1 0 0 0 0)
septin 8 isoform a [Homo sapiens]	4.09483e-06	10.1944	55721.1	149363689	1 (1 0 0 0 0)
DREB_HUMAN Drebrin (Developmentally-regulated brain protein)	1.83495e-06	10.1935	71381.6	2498313	1 (1 0 0 0 0)
heterogeneous nuclear ribonucleoprotein A3 [Homo sapiens]	3.08508e-06	10.192	39570.5	34740329	1 (1 0 0 0 0)
NDUV2_HUMAN NADH dehydrogenase [ubiquinone] flavoprotein 2, mitochondrial pre	2.12825e-07	10.1843	27374	20455499	1 (1 0 0 0 0)
EPB41L3 protein [Homo sapiens]	1.27863e-07	10.1789	96454.3	13544009	1 (1 0 0 0 0)
neurofilament-66; NF-66 [Homo sapiens]	0.000231216	10.1785	54875.2	994844	1 (1 0 0 0 0)
tubulin, alpha 8 [Homo sapiens]	6.57923e-09	10.1782	50061.6	9507215	1 (1 0 0 0 0)
zinc finger, CDGSH-type domain 1 [Homo sapiens]	1.7463e-07	10.1779	12191.2	8923930	1 (1 0 0 0 0)
neuronal growth regulator 1 [Homo sapiens]	2.63674e-05	10.177	38694.3	66346706	1 (1 0 0 0 0)
solute carrier family 25 member 3 isoform b precursor [Homo sapiens]	1.82036e-09	10.1743	39932.7	4505775	2 (2 0 0 0 0)
glycoprotein M6A isoform 1 [Homo sapiens]	2.82798e-05	10.1743	31188.4	14149619	2 (2 0 0 0 0)
neuroplastin isoform a precursor [Homo sapiens]	3.97998e-05	10.1736	31271.9	9257240	1 (1 0 0 0 0)
NADH dehydrogenase (ubiquinone) Fe-S protein 1, 75kDa precursor [Homo	5.78646e-05	10.1685	79416.6	33519475	1 (1 0 0 0 0)
unnamed protein product [Homo sapiens]	1.24097e-08	10.1632	40203.1	22760099	1 (1 0 0 0 0)
ubiquinol-cytochrome c reductase, Rieske iron-sulfur polypeptide 1 [Hom	1.9661e-06	10.1612	29633.4	5174743	1 (1 0 0 0 0)
Ca2+-dependent activator protein for secretion 2 isoform a [Homo sapi	0.00123663	10.1573	147641	148839294	2 (1 0 0 1 0)
ubiquinol-cytochrome c reductase binding protein [Homo sapiens]	6.20715e-11	10.1566	13522	5454152	1 (1 0 0 0 0)
H2A histone family, member A [Homo sapiens]	9.55044e-05	10.1518	14127	10645195	3 (3 0 0 0 0)
neurofilament, light polypeptide 68kDa, isoform CRA_b [Homo sapiens] [M	0.00859242	10.1466	56924	119584005	2 (1 0 1 0 0)
cytochrome c oxidase subunit VIIa polypeptide 2 (liver) precursor [Homo	0.000127498	10.1424	9390.1	4502989	1 (1 0 0 0 0)
NADH dehydrogenase (ubiquinone) 1 alpha subcomplex, 5 [Homo sapiens]	0.00298002	10.1401	13450.2	4826848	1 (1 0 0 0 0)
KNP-I beta protein [Homo sapiens]	1.62507e-05	10.14	20110.6	2250701	2 (2 0 0 0 0)
mitochondrial NADH-Ubiquinone oxidoreductase 10-kDa subunit [Homo sapien	3.81071e-08	10.1395	11933.1	6002197	1 (1 0 0 0 0)
fiber protein [Human adenovirus type 23]	0.00248211	10.1385	32931.8	82523578	1 (1 0 0 0 0)
helicase, lymphoid-specific [Homo sapiens]	0.00648017	10.1376	97012.3	21914927	1 (1 0 0 0 0)
alpha 2 globin [Homo sapiens]	8.04035e-07	10.1374	15247.9	4504345	1 (1 0 0 0 0)
ubiquitin specific protease 14 isoform a [Homo sapiens]	9.28149e-06	10.1364	56033.1	4827050	1 (1 0 0 0 0)
solute carrier family 1, member 4 [Homo sapiens]	2.96038e-05	10.1351	55687.8	21314632	1 (1 0 0 0 0)
unnamed protein product [Homo sapiens]	0.00500544	10.135	51655	22760645	1 (1 0 0 0 0)
CD9 antigen [Homo sapiens]	8.47667e-07	10.1334	25399	4502693	1 (1 0 0 0 0)
AF184368_1 gag protein [Human immunodeficiency virus type 1]	0.00769476	10.1322	20440.3	6815550	1 (1 0 0 0 0)
upstream binding transcription factor, RNA polymerase I [Homo sapiens]	0.00470673	10.1317	18636.5	13397837	2 (0 1 0 0 1)
ADP-ribosylation factor 5 [Homo sapiens]	0.000639214	10.1299	20516.6	4502209	1 (1 0 0 0 0)
U60, late spliced gene(U60 /66) [Human herpesvirus 6A]	0.00504323	10.1286	36060.2	9628362	3 (2 0 0 1 0)
putative endonuclease V [Dictyostelium discoideum AX4]	0.0073064	10.1278	61779.4	66819958	1 (1 0 0 0 0)
hypothetical protein [Homo sapiens]	7.18097e-05	10.1275	47524.3	21739836	1 (1 0 0 0 0)
GDP dissociation inhibitor 1 [Homo sapiens]	5.3457e-06	10.1274	50550.2	4503971	1 (1 0 0 0 0)
tubulin, beta 5 [Mus musculus]	3.01155e-08	10.1271	49639	7106439	5 (4 1 0 0 0)
unnamed protein product [Homo sapiens]	0.00100526	10.1266	25215.2	28193116	1 (1 0 0 0 0)
testis specific ankyrin-like protein 1 [Homo sapiens]	0.000852345	10.1252	105466	7288159	1 (1 0 0 0 0)
guanine nucleotide binding protein (G protein), gamma 3 subunit [Mus mu	0.00101387	10.1227	8299.16	6754022	1 (1 0 0 0 0)
envelope glycoprotein [Simian-Human immunodeficiency virus]	0.00501598	10.1224	44680.3	20530338	2 (2 0 0 0 0)
NADH dehydrogenase (ubiquinone) 1 alpha subcomplex, 4, 9kDa [Homo sapie	1.55859e-05	10.1213	9363.91	4505357	1 (1 0 0 0 0)
hypothetical protein LOC91289 [Homo sapiens]	0.00674026	10.1213	76866.1	24308356	2 (1 0 0 1 0)
heat shock 10kDa protein 1 (chaperonin 10) [Homo sapiens]	0.000288993	10.1175	10924.9	4504523	2 (2 0 0 0 0)
immunoglobulin heavy chain variable region [Homo sapiens]	0.000785956	10.1175	13533.8	114147588	2 (1 0 0 0 1)
claudin 11 [Homo sapiens]	0.0030294	10.1171	21978.4	10938016	3 (3 0 0 0 0)
nef protein [Human immunodeficiency virus 1]	0.00252393	10.1167	23510.5	31087630	1 (1 0 0 0 0)
gag protein [Human immunodeficiency virus type 1] [M	0.00283496	10.1166	8518.43	4324590	1 (1 0 0 0 0)
gag protein [Human immunodeficiency virus 1]	0.00408776	10.1166	55769.5	124389770	1 (1 0 0 0 0)
calcium/calmodulin-dependent protein kinase IIB isoform 2 [Homo sapien	0.000901237	10.1165	60348.7	26051206	2 (2 0 0 0 0)
A Chain A, The Crystal Structure Of Human Transhydrogenase Domain Iii With Bou	0.000138946	10.1162	22245.4	12084180	2 (2 0 0 0 0)
cytochrome P450, family 2, subfamily B, polypeptide 6 [Homo sapiens]	0.00106235	10.1161	56242.5	7949031	1 (1 0 0 0 0)
mitochondrial carrier homolog 2 [Homo sapiens]	3.67271e-06	10.1157	33308.9	7657347	1 (1 0 0 0 0)
arginine/serine-rich coiled-coil 2 isoform b [Homo sapiens]	0.00821509	10.1151	43778.9	38146113	1 (1 0 0 0 0)
myelin basic protein isoform 4 [Homo sapiens]	0.00184302	10.115	17332.8	68509932	1 (1 0 0 0 0)
spermatogenesis associated 13 [Homo sapiens]	0.00186644	10.1145	16534.1	55664476	1 (1 0 0 0 0)
unnamed protein product [Homo sapiens]	0.00887077	10.1132	5955.1	1335235	1 (1 0 0 0 0)
immunoglobulin heavy chain variable region [Homo sapiens]	0.00984729	10.1129	10558.1	112691600	1 (1 0 0 0 0)
envelope glycoprotein [Human immunodeficiency virus 1]	0.00465206	10.1119	20609.3	95106041	1 (1 0 0 0 0)
A Chain A, Human Heart L-Lactate Dehydrogenase H Chain, Ternary Complex With N	0.00279299	10.1115	36484.1	13786847	1 (1 0 0 0 0)
A Chain A, Crystal Structure Of Truncated Human Rhogdi K113a Mutant	0.000426993	10.11	15879.1	14278162	1 (1 0 0 0 0)
gp160 [Human immunodeficiency virus 1]	0.000510275	10.1099	96239.5	18996230	1 (1 0 0 0 0)
S63994 protein disulfide-isomerase (EC 5.3.4.1) ER60 precursor - human	0.000818414	10.1085	56715.8	2135267	1 (1 0 0 0 0)
AF392588_1 envelope glycoprotein [Human immunodeficiency virus type 1] [M	0.00873168	10.1074	15970.9	16305214	1 (1 0 0 0 0)
guanine nucleotide binding protein (G protein), gamma 7 [Homo sapiens]	2.29236e-07	10.1073	7516.95	32698769	1 (1 0 0 0 0)
prohibitin 2 [Homo sapiens]	0.00770445	10.1048	33275.9	6005854	1 (1 0 0 0 0)
vif protein [Human immunodeficiency virus 2]	0.00366872	10.1041	25296.1	9628883	1 (1 0 0 0 0)
envelope glycoprotein [Human immunodeficiency virus 1]	0.00442323	10.1038	47350.1	35397012	2 (0 0 1 1 0)
DEAD box RNA helicase [Homo sapiens]	0.00798509	10.1027	79273.9	9438227	1 (1 0 0 0 0)
microsomal glutathione S-transferase 3 [Homo sapiens]	5.80099e-05	10.1023	16505.6	4758714	2 (1 1 0 0 0)
gag protein [Human immunodeficiency virus 1]	0.00194204	10.1008	21397.7	113967997	1 (1 0 0 0 0)
envelope glycoprotein [Human immunodeficiency virus type 1]	0.00713936	10.1007	57535.7	19568959	6 (1 3 2 0 0)
hCG1798762 [Homo sapiens]	0.0035946	10.0998	4946.41	119617871	1 (1 0 0 0 0)
immunoglobulin light chain variable region [Homo sapiens]	0.0030247	10.0992	11695.8	66096638	4 (2 0 1 1 0)
phytanoyl-CoA 2-hydroxylase interacting protein-like [Homo sapiens]	0.00598542	10.099	42473	33469021	1 (1 0 0 0 0)
FXYD domain-containing ion transport regulator 6 [Homo sapiens]	0.000595853	10.0988	10535.4	11612655	1 (1 0 0 0 0)
envelope glycoprotein [Human immunodeficiency virus 1]	0.000615282	10.0986	19613.9	125395525	1 (1 0 0 0 0)
tat protein [Human immunodeficiency virus 1]	0.00496217	10.0969	11472.5	38892786	1 (1 0 0 0 0)
envelope glycoprotein [Human immunodeficiency virus 1]	0.00117236	10.0964	28176.3	87045068	1 (1 0 0 0 0)
unactive progesterone receptor, 23 kD [Homo sapiens]	4.36609e-06	10.0963	18685.4	23308579	1 (1 0 0 0 0)
MARCS_HUMAN Myristoylated alanine-rich C-kinase substrate (MARCKS) (Protein k	0.000988019	10.0953	31535.9	76803798	1 (1 0 0 0 0)
unnamed protein product [Homo sapiens]	0.00554697	10.0951	20379.3	28375487	2 (1 1 0 0 0)
FTO protein [Homo sapiens]	0.000509051	10.0948	12210.4	124376348	1 (1 0 0 0 0)
AF457059_3 vif protein [Human immunodeficiency virus 1]	0.00132914	10.0944	22599.7	22596295	1 (1 0 0 0 0)
A Chain A, Cyclophilin A Complexed With Dipeptide Gly-Pro	0.00900499	10.0936	17869.8	1633054	1 (1 0 0 0 0)
gag protein [Human immunodeficiency virus 1]	0.00750802	10.092	5262.67	57867994	1 (1 0 0 0 0)
ADT3_HUMAN ADP/ATP translocase 3 (Adenine nucleotide translocator 2) (ANT 3) (A	0.000877276	10.0917	32845.2	113463	1 (1 0 0 0 0)
Sim [Homo sapiens]	0.00688403	10.0916	27624.2	1408537	1 (1 0 0 0 0)
envelope glycoprotein [Human immunodeficiency virus 1]	0.00821233	10.0914	26776.6	2250924	1 (1 0 0 0 0)
protease [Human immunodeficiency virus 2]	0.000401394	10.0913	10102.5	51243626	1 (1 0 0 0 0)
immunoglobulin heavy chain variable region [Homo sapiens]	0.00630593	10.0912	13681.9	146330494	1 (1 0 0 0 0)
ribosomal protein L8 [Homo sapiens]	0.000301336	10.0912	28007.3	4506663	1 (1 0 0 0 0)
hCG2029577, isoform CRA_d [Homo sapiens]	0.00551915	10.091	108082	119602280	1 (1 0 0 0 0)
immunoglobulin heavy chain variable region [Homo sapiens]	0.00485786	10.0907	12167.8	15886992	1 (1 0 0 0 0)
immunoglobulin heavy chain variable region [Homo sapiens]	0.0086134	10.0904	10932.3	112701349	1 (1 0 0 0 0)
unnamed protein product [Homo sapiens]	0.00487029	10.0897	125143	34536041	2 (0 0 1 1 0)
ADAM metallopeptidase domain 21 preproprotein [Homo sapiens]	0.003819	10.0896	80766.1	11497040	1 (1 0 0 0 0)
HSP70-HOM [Homo sapiens]	0.00309485	10.0895	70361.4	4529894	1 (1 0 0 0 0)
ATPase, H+ transporting, lysosomal, V0 subunit d1 [Homo sapiens]	3.70009e-05	10.0883	40303.3	19913432	1 (1 0 0 0 0)
actin-like protein [Homo sapiens]	0.000215461	10.088	11602.9	62421077	1 (1 0 0 0 0)
solute carrier family 11 (proton-coupled divalent metal ion transporte	0.0030407	10.0878	61416.1	10835169	1 (1 0 0 0 0)
zinc finger protein 394 [Homo sapiens]	0.00700287	10.0876	64215.7	31982909	3 (0 0 0 2 1)
SH2 domain protein 1A isoform E [Homo sapiens]	0.00413185	10.0874	8183.2	3928900	1 (1 0 0 0 0)
diaphanous 2 isoform 156 [Homo sapiens]	0.000365406	10.0868	125490	5803003	2 (0 0 1 1 0)
leucine-rich B7 protein isoform 1 variant [Homo sapiens]	0.0025984	10.0868	39746	62898802	1 (1 0 0 0 0)
ZPBP1_HUMAN Zona pellucida-binding protein 1 precursor (Sp38)	0.000820472	10.0867	40115.7	54036652	1 (1 0 0 0 0)
IgD variable region [Homo sapiens]	0.00774113	10.0864	11495.6	1617090	1 (1 0 0 0 0)
unnamed protein product [Homo sapiens]	0.00828278	10.0863	149049	34532097	3 (0 0 0 2 1)
envelope glycoprotein [Human immunodeficiency virus 1]	0.00236207	10.0855	97531.9	113196552	1 (1 0 0 0 0)
ribonuclease, RNase A family, 10 (non-active) [Homo sapiens]	0.000631637	10.0845	23992.8	61175227	1 (1 0 0 0 0)
similar to t-complex 1; T-complex locus TCP-1; t-complex 1 (a murine tcp	0.00172521	10.0844	19812.7	51094756	11 (8 1 0 1 1)
similar to XM_028438 CGI-101 protein in Homo sapiens [Schistosoma japoni	3.19893e-05	10.0836	27459	29840977	1 (1 0 0 0 0)
hCG2041105 [Homo sapiens]	0.00401464	10.0826	6538.44	119625182	1 (1 0 0 0 0)
WNT9B_HUMAN Protein Wnt-9b precursor (Wnt-15) (Wnt-14b)	0.00129885	10.0826	38945.3	20532421	2 (1 1 0 0 0)
nef protein [Human immunodeficiency virus 1]	0.00564925	10.0825	23729.7	31087512	1 (1 0 0 0 0)
unnamed protein product [Homo sapiens]	0.00475719	10.0822	52369.9	21755689	1 (1 0 0 0 0)
hCG33128, isoform CRA_b [Homo sapiens]	0.00588406	10.0817	78061.7	119628915	18 (6 4 3 2 3)
envelope glycoprotein [Human immunodeficiency virus 1]	0.000480489	10.0817	7867.13	28629409	1 (1 0 0 0 0)
AF484498_8 nef protein [Human immunodeficiency virus 1]	0.000312055	10.0806	23894.7	25166838	1 (1 0 0 0 0)
VEGF-C=32 kda vascular endothelial growth factor/Flt4 ligand [human, pros	0.00266353	10.0803	39809.4	1438778	1 (1 0 0 0 0)
septin 5 [Homo sapiens]	0.000975919	10.0802	42749.7	9945439	1 (1 0 0 0 0)
TCPW_HUMAN T-complex protein 1 subunit zeta-2 (TCP-1-zeta-2) (CCT-zeta-2) (TC	0.00720509	10.0802	57728.6	22654293	2 (1 0 1 0 0)
ryanodine receptor type1 [Homo sapiens]	0.00767296	10.0801	5201.74	18181960	1 (1 0 0 0 0)
chromosome 9 open reading frame 64, isoform CRA_a [Homo sapiens]	0.00377032	10.0799	41882.3	119583076	1 (1 0 0 0 0)
DEAH (Asp-Glu-Ala-His) box polypeptide 40, isoform CRA_e [Homo sapiens]	0.000405693	10.0797	50220	119614812	1 (1 0 0 0 0)
ATP synthase, H+ transporting, mitochondrial F1 complex, delta subunit	0.0081346	10.0794	17479.2	4502297	1 (1 0 0 0 0)
SIRP-b2 [Homo sapiens]	0.000889599	10.0782	38936.1	7861557	1 (1 0 0 0 0)
acidic alpha 1 syntrophin [Homo sapiens]	0.00486806	10.0774	53862	4507137	2 (1 0 0 0 1)
Transmembrane protein 183A [Homo sapiens]	0.000773927	10.0766	42828.9	24659277	6 (2 2 1 0 1)
G-protein-coupled receptor induced protein [Homo sapiens]	0.00729827	10.0766	40982.9	13399328	1 (1 0 0 0 0)
hypothetical protein [Homo sapiens]	0.00826339	10.0765	33152.7	31873924	1 (1 0 0 0 0)
envelope glycoprotein [Human immunodeficiency virus 1]	0.00478935	10.0763	37229.9	73764087	2 (2 0 0 0 0)
phosphotyrosyl phosphatase activator [Homo sapiens]	0.00535636	10.0761	36765.8	509243	1 (1 0 0 0 0)
DNA replication origin-binding helicase [Human herpesvirus 1]	0.00435947	10.0757	94201.2	9629389	2 (1 0 0 1 0)
envelope glycoprotein V3 region [Human immunodeficiency virus 1]	0.000544376	10.0754	9528.09	1850135	1 (1 0 0 0 0)
AF139987_3 Wbscr1 alternative spliced product [Mus musculus]	0.000116944	10.0752	25170.5	4972951	1 (1 0 0 0 0)
A Chain A, Recombinant Serine Hydroxymethyltransferase (Human)	0.00452285	10.0749	51424.3	5821827	2 (1 1 0 0 0)
poly(rC) binding protein 1 [Mus musculus]	0.00146054	10.0748	37473.9	6754994	1 (1 0 0 0 0)
pol protein [Human immunodeficiency virus 1]	0.00991009	10.0741	10540.6	116274784	1 (1 0 0 0 0)
RAB3A, member RAS oncogene family [Homo sapiens]	0.00971466	10.0741	24968.1	4506367	1 (1 0 0 0 0)
fiber protein [Human adenovirus type 3]	0.00529862	10.074	23883.2	38641243	1 (1 0 0 0 0)
EAA1_HUMAN Excitatory amino acid transporter 1 (Solute carrier family 1 member	1.61131e-05	10.073	59533.8	1169458	1 (1 0 0 0 0)
env protein [Human immunodeficiency virus 1]	0.00807366	10.0728	96831.7	37682965	2 (0 0 1 1 0)
unnamed protein product [Homo sapiens]	0.00647619	10.0714	99011.9	10436758	1 (1 0 0 0 0)
nef protein [Human immunodeficiency virus 1]	0.00809265	10.0713	23647.8	44194555	1 (1 0 0 0 0)
mitochondrial transcription termination factor precursor [Homo sapiens]	0.00657269	10.071	45749.1	5902010	1 (1 0 0 0 0)
spindle pole body component 25 [Homo sapiens]	0.00791922	10.0708	26136.5	10190716	1 (1 0 0 0 0)
similar to NM_021205 CDC42-like GTPase; novel Ras family protein; Wrch-1	0.00464692	10.0704	20535.5	29841054	1 (1 0 0 0 0)
VP4 [Human rotavirus G3]	0.00266457	10.0702	87359	4803828	1 (1 0 0 0 0)
exterior membrane protein gp120 [Human immunodeficiency virus 1]	0.00341169	10.07	39115.4	7258506	3 (1 1 0 0 1)
gp120 [Human immunodeficiency virus 1]	0.00422101	10.0691	9848.13	9968203	1 (1 0 0 0 0)
UL134 [Human herpesvirus 5]	0.00471925	10.069	19536.3	51814231	2 (1 0 1 0 0)
solute carrier family 25 (mitochondrial carrier, Aralar), member 12 [H	0.000301046	10.0688	74715	21361103	1 (1 0 0 0 0)
ZNF589 protein [Homo sapiens]	0.00204553	10.0688	42752.4	28981415	1 (1 0 0 0 0)
envelope protein [Human immunodeficiency virus 1] [	0.00340843	10.0686	10185.4	1065822	1 (1 0 0 0 0)
sushi-repeat-containing protein, X-linked [Homo sapiens]	0.00604577	10.0683	51538.2	5454086	2 (0 1 0 0 1)
AF166057_1 protease/reverse transcriptase [Human immunodeficiency virus ty	0.00189622	10.0682	38985.6	6049464	1 (1 0 0 0 0)
JC7831 cancer-associated CAGE protein - human	0.00294021	10.0677	71110.8	60729526	2 (0 1 0 0 1)
immunoglobulin heavy chain variable region [Homo sapiens]	0.0045946	10.0674	13269.5	84683040	1 (1 0 0 0 0)
AF170084_1 metalloproteinase with thrombospondin type 1 motifs ADAMTS1 [Ho	0.00902113	10.067	105352	6525075	1 (1 0 0 0 0)
mitogen-activated protein kinase kinase 1 [Homo sapiens]	0.00274064	10.0668	43411.3	5579478	1 (1 0 0 0 0)
gag protein [Human immunodeficiency virus 1]	0.00243173	10.0662	14465.3	80975215	1 (1 0 0 0 0)
hCG2045818 [Homo sapiens]	0.00239864	10.0662	24519.1	119629904	1 (1 0 0 0 0)
A Chain A, Structure Of The Human PinLC8 DIMER WITH A BOUND PEPTIDE	0.000425669	10.066	9853.93	7245516	1 (1 0 0 0 0)
AF151823_1 CGI-65 protein [Homo sapiens]	0.00395699	10.066	37706.1	4929599	1 (1 0 0 0 0)
hypothetical protein [Homo sapiens]	0.00241288	10.065	43473.5	19584389	1 (1 0 0 0 0)
pol protein [Human immunodeficiency virus 1]	0.00670063	10.0643	49450.5	77993656	1 (1 0 0 0 0)
heparan sulfate (glucosamine) 3-O-sulfotransferase 5 [Homo sapiens]	0.0048385	10.0643	40382.7	45267824	5 (2 1 2 0 0)
seven in absentia homolog 1 isoform b [Homo sapiens]	0.00738263	10.0634	34605	55749557	3 (2 0 1 0 0)
pol protein [Human immunodeficiency virus 1]	0.00271188	10.0628	57070.5	42717264	1 (1 0 0 0 0)
cyclin B2 [Homo sapiens]	0.00512267	10.0627	45269.8	54695786	1 (1 0 0 0 0)
unnamed protein product [Homo sapiens]	0.00515849	10.0627	20486.7	34535437	1 (1 0 0 0 0)
poly (ADP-ribose) polymerase family, member 11 [Homo sapiens]	0.00160797	10.0625	38713.9	9966837	1 (1 0 0 0 0)
tenascin-X precursor [Homo sapiens]	0.000611765	10.0623	78381	394780	1 (1 0 0 0 0)
WD repeat domain 57 (U5 snRNP specific) [Homo sapiens]	0.00629076	10.0616	39285.7	115298668	2 (0 1 0 0 1)
TATA box binding protein (TBP)-associated factor, RNA polymerase I, C,	0.00437807	10.0612	42576.1	119615903	1 (1 0 0 0 0)
AF484498_7 truncated envelope glycoprotein [Human immunodeficiency virus	0.007037	10.0606	94557.2	25166837	1 (1 0 0 0 0)
mitochondrial ATP synthase, O subunit precursor [Homo sapiens]	0.00156341	10.0602	23262.7	4502303	1 (1 0 0 0 0)
envelope glycoprotein [Human T-cell lymphotropic virus type 1]	0.0075733	10.06	18635	2138245	1 (1 0 0 0 0)
AF131950_8 putative major capsid protein L1 [Human papillomavirus candHPV8	0.00736459	10.0593	56399.1	4574728	2 (1 0 1 0 0)
phosphoglycerate kinase 1 [Homo sapiens]	0.00394802	10.0583	44586.2	4505763	1 (1 0 0 0 0)
KIAA0780 protein [Homo sapiens]	0.00386581	10.0582	123920	3882281	5 (0 0 2 1 2)
hypothetical protein [Homo sapiens]	0.00524315	10.0581	31392.2	21739543	2 (0 0 1 1 0)
AF080134_1 envelope glycoprotein; gp120 [Human immunodeficiency virus type	0.00968352	10.0574	8168.34	5456725	1 (1 0 0 0 0)
immunoglobulin heavy chain variable region [Homo sapiens]	0.00374529	10.057	11059.4	112699984	1 (1 0 0 0 0)
Kruppel-like factor 6, isoform CRA_c [Homo sapiens]	0.000251564	10.0565	21366.3	119606884	2 (1 1 0 0 0)
envelope glycoprotein [Human immunodeficiency virus 1]	0.00929519	10.0562	98251.4	31581849	1 (1 0 0 0 0)
growth factor independent 1B (potential regulator of CDKN1A, translocat	0.00272169	10.0559	32398	55665592	1 (1 0 0 0 0)
I78843 receptor protein-tyrosine kinase - human (fragment)	0.000397663	10.0556	110151	7434436	3 (0 0 0 2 1)
envelope glycoprotein [Human immunodeficiency virus 1]	0.00441262	10.0551	7729.01	48526771	1 (1 0 0 0 0)
gag protein [Human immunodeficiency virus 1]	0.00647065	10.0548	55689.4	29119296	1 (1 0 0 0 0)
hypothetical protein LOC442444 [Homo sapiens]	0.00836416	10.0544	115266	61966919	2 (0 0 1 1 0)
A Chain A, Crystal Structure Of Human Cytochrome P450 2d6	0.00535679	10.0541	53703.9	85544647	1 (1 0 0 0 0)
unnamed protein product [Homo sapiens]	0.000704666	10.054	54581.9	7023107	2 (0 1 0 0 1)
Unknown (protein for MGC:26619) [Homo sapiens] [MAS	0.00531053	10.0534	46938.4	71296700	1 (1 0 0 0 0)
ATP-binding cassette, sub-family A (ABC1), member 2 [Homo sapiens] [MAS	0.0023173	10.0531	24816	55962680	1 (1 0 0 0 0)
hypothetical protein LOC85395 [Homo sapiens]	0.000847164	10.0526	25440.8	17158023	1 (1 0 0 0 0)
envelope glycoprotein [Human immunodeficiency virus 1]	0.0093939	10.0518	14079.3	24369794	1 (1 0 0 0 0)
KLK15 splice variant 1 [Homo sapiens]	0.0013895	10.0516	13898.2	9957761	1 (1 0 0 0 0)
gp120 protein [Human immunodeficiency virus 1] [MA	0.00512458	10.0495	14850.5	34786690	1 (1 0 0 0 0)
AF	0.000314931	10.049	110973	6850324	1 (1 0 0 0 0)
calpain 7 [Homo sapiens]	0.00874799	10.0483	92593.9	7656959	2 (0 0 1 1 0)
hCG27965, isoform CRA_a [Homo sapiens]	0.00321163	10.0473	19552.9	119571624	1 (1 0 0 0 0)
homeobox A10 isoform a [Homo sapiens]	0.00283633	10.0469	40510.8	24497549	1 (1 0 0 0 0)
hypothetical protein [Homo sapiens]	0.00322884	10.0457	7973.86	50949921	1 (1 0 0 0 0)
envelope glycoprotein [Human immunodeficiency virus 1]	0.00473297	10.0455	13043.6	30144041	1 (1 0 0 0 0)
aquaporin-2 mutant [Homo sapiens]	0.00801654	10.0439	10704.6	21103957	1 (1 0 0 0 0)
envelope glycoprotein [Human immunodeficiency virus type 1]	0.0084196	10.0424	26333.4	1845947	1 (1 0 0 0 0)
basic helix-loop-helix domain containing, class B, 5 [Homo sapiens] [MA	0.000532044	10.042	36501	119607282	1 (1 0 0 0 0)
hCG1655317 [Homo sapiens]	0.00629489	10.0414	21432.3	119600786	1 (1 0 0 0 0)
myosin XVA, isoform CRA_c [Homo sapiens]	0.00858754	10.0404	394839	119576069	1 (1 0 0 0 0)
pol protein [Human immunodeficiency virus 1]	0.00735871	10.0392	62084.7	87246087	1 (1 0 0 0 0)
unnamed protein product [Homo sapiens]	0.000773517	10.0388	17724.8	7023174	1 (1 0 0 0 0)
RAP1, GTP-GDP dissociation stimulator 1 [Homo sapiens]	0.00827931	10.0333	66288.7	20070314	1 (1 0 0 0 0)
bcl-xL [Homo sapiens]	0.00564937	10.0332	26046.7	510901	1 (1 0 0 0 0)
vpr protein [Human immunodeficiency virus 1]	0.00467264	10.0319	11355.8	82571342	1 (1 0 0 0 0)
Tubulin, beta [Homo sapiens]	0.00166567	8.18393	49640	18088719	4 (3 1 0 0 0)
reverse transcriptase [Human immunodeficiency virus 1]	0.00043304	8.17893	32923	55705774	12 (0 9 0 1 2)
reverse transcriptase [Human immunodeficiency virus 1]	0.00991136	8.16313	25570.5	56714218	1 (0 1 0 0 0)
envelope glycoprotein [Human immunodeficiency virus 1]	0.00391207	8.15119	9311.87	38018627	1 (0 1 0 0 0)
Na,K-ATPase catalytic subunit alpha-A protein [Homo sapiens]	6.45887e-05	8.14688	3563.7	5919228	2 (0 2 0 0 0)
unnamed protein product [Homo sapiens]	0.00932975	8.1259	77501.7	10434740	1 (0 1 0 0 0)
UL120 [Human herpesvirus 5 strain Merlin]	0.00151201	8.12567	23119.5	52139284	6 (0 4 0 1 1)
actin-like protein [Homo sapiens]	6.39521e-05	8.12495	11548	62420916	2 (0 2 0 0 0)
nucleolar protein NOP5/NOP58 [Homo sapiens]	0.00769476	8.1209	59540.6	7706254	1 (0 1 0 0 0)
MBNL1 protein [Homo sapiens]	0.0022743	8.12025	4127.05	13529014	3 (0 1 1 0 1)
STE20-like kinase [Homo sapiens]	0.00271523	8.11951	115884	11596144	1 (0 1 0 0 0)
lipin 3 [Homo sapiens]	0.000279559	8.11663	93556.5	74271888	4 (0 1 1 2 0)
calcium/calmodulin-dependent protein kinase II delta isoform 1 [Homo s	0.00650194	8.11601	54093.6	26667183	2 (0 2 0 0 0)
hCG1758404 [Homo sapiens]	0.00144764	8.11486	11122.7	119628474	1 (0 1 0 0 0)
spectrin, alpha, non-erythrocytic 1 (alpha-fodrin), isoform CRA_h [Homo	0.00581502	8.11369	280168	119608218	1 (0 1 0 0 0)
immunoglobulin kappa light chain VLJ region [Homo sapiens]	0.00367437	8.11335	28054	21669319	3 (0 3 0 0 0)
immunoglobulin heavy chain variable region [Homo sapiens]	0.00984729	8.11253	10655.2	112702776	1 (0 1 0 0 0)
pol protein [Human immunodeficiency virus 1]	0.00127679	8.11198	56979.6	42717134	3 (0 1 1 0 1)
A Chain A, Crystal Structure Of Human Pirin: A Bcl-3 And Nuclear Factor I Inte	0.00476648	8.11136	31985.5	40889062	1 (0 1 0 0 0)
BORF2 [Human herpesvirus 4 type 1]	0.00346184	8.1106	92970.9	82503213	2 (1 1 0 0 0)
immunoglobulin heavy chain variable region [Homo sapiens]	0.00680746	8.10509	10790.1	112695327	1 (0 1 0 0 0)
G-protein gamma-12 subunit [Homo sapiens]	7.38068e-05	8.10456	8001.17	51036603	1 (0 1 0 0 0)
envelope glycoprotein [Human immunodeficiency virus type 1]	0.00713627	8.1045	22355.1	2190837	1 (0 1 0 0 0)
neurotrimin isoform 1 [Homo sapiens]	0.00125401	8.10258	37947.5	7705413	1 (0 1 0 0 0)
DNA polymerase catalytic subunit [Human herpesvirus 2]	0.00860183	8.1016	137241	9629300	1 (0 1 0 0 0)
gp120 [Human immunodeficiency virus type 1]	0.000265274	8.09799	24460.3	4071152	2 (0 1 0 1 0)
anchor protein [Homo sapiens]	0.00288634	8.09778	452956	53830059	1 (0 1 0 0 0)
tripartite motif-containing 3 [Homo sapiens]	0.000136272	8.09747	80779.1	32454737	1 (0 1 0 0 0)
reverse transcriptase [Human immunodeficiency virus 1]	0.00784735	8.09322	22394.7	67080168	1 (0 1 0 0 0)
envelope glycoprotein [Human immunodeficiency virus 1]	0.00225639	8.09139	14960.6	50981509	1 (0 1 0 0 0)
SO1B1_HUMAN Solute carrier organic anion transporter family member 1B1 (Solut	0.00194149	8.09009	76399	12643959	1 (0 1 0 0 0)
Homo sapiens enolase 1, (alpha) [synthetic construct]	0.00784452	8.08933	51744.4	30584989	1 (0 1 0 0 0)
reverse transcriptase [Human immunodeficiency virus 1]	0.00111827	8.08916	19922.4	89519936	2 (0 1 0 0 1)
reverse transcriptase [Human immunodeficiency virus 1]	0.00630147	8.08867	30108.1	23954964	1 (0 1 0 0 0)
pol protein [Human immunodeficiency virus 1]	0.00786323	8.08832	49351.4	87137907	1 (0 1 0 0 0)
envelope glycoprotein [Human immunodeficiency virus 1]	0.00320405	8.08796	44417.7	35396916	1 (0 1 0 0 0)
copine III [Homo sapiens]	0.00854114	8.08709	60092.3	4503015	2 (0 0 1 0 1)
human phosphotyrosine phosphatase kappa [Homo sapiens]	0.0056744	8.08686	161984	1418932	2 (0 0 0 2 0)
v-myb myeloblastosis viral oncogene homolog [Homo sapiens]	0.000901327	8.08653	72296.2	46361980	1 (0 1 0 0 0)
immunoglobulin heavy chain variable region [Homo sapiens]	0.00905181	8.08629	13046.6	114386213	1 (0 1 0 0 0)
F-box and leucine-rich repeat protein 10 isoform a [Homo sapiens]	0.00999404	8.0855	152517	54112382	7 (1 1 3 0 2)
KIAA1467 protein [Homo sapiens]	0.00776016	8.0848	47118.3	7959195	1 (0 1 0 0 0)
melanoma-associated antigen [Homo sapiens]	0.00462599	8.08479	123640	3176846	1 (0 1 0 0 0)
alpha-ketoglutarate dehydrogenase complex dihydrolipoyl succinyltransferas	0.00526234	8.08439	48619.4	632884	1 (0 1 0 0 0)
envelope glycoprotein [Human T-cell lymphotropic virus type 1]	0.000661399	8.08418	18657	2138230	1 (0 1 0 0 0)
ATPase, Class I, type 8B, member 1 [Homo sapiens]	0.000548998	8.08347	143634	5031697	1 (0 1 0 0 0)
immunoglobulin A heavy chain variable region [Homo sapiens]	0.00400066	8.08325	11443.5	121944598	1 (0 1 0 0 0)
ITIH3_HUMAN Inter-alpha-trypsin inhibitor heavy chain H3 precursor (ITI heavy	0.00281332	8.08309	99059.2	3024064	2 (0 0 0 2 0)
nef protein [Human immunodeficiency virus type 1] [M	0.0056029	8.08264	23524.5	6694572	1 (0 1 0 0 0)
DPP10_HUMAN Inactive dipeptidyl peptidase 10 (Dipeptidyl peptidase X) (Dipept	0.00216477	8.08249	90876.5	67460566	1 (0 1 0 0 0)
phosphotriesterase related [Homo sapiens]	0.00349703	8.08192	38993	20070186	1 (0 1 0 0 0)
protease [Human immunodeficiency virus 2]	0.00444688	8.08157	21047	73765391	1 (0 1 0 0 0)
envelope glycoprotein [Human immunodeficiency virus 1]	0.00049029	8.08154	39370.9	61741756	2 (0 1 0 0 1)
A20-binding inhibitor of NF-kappaB activation-2 [Homo sapiens]	0.00255069	8.08121	48678.5	13445188	2 (0 0 1 0 1)
envelope glycoprotein [Human immunodeficiency virus 1]	0.00999695	8.08095	97509.1	45357408	1 (0 1 0 0 0)
melanoma antigen, family H, 1 protein [Homo sapiens]	8.49031e-06	8.08029	24425.3	15042941	1 (0 1 0 0 0)
liver glycine methyltransferase [Homo sapiens] [MAS	0.00520518	8.08005	29248.5	1335203	1 (0 1 0 0 0)
RNA dependent RNA polymerase [Human norovirus Saitama]	0.00476945	8.07968	25256.6	46093249	2 (1 1 0 0 0)
polycystic kidney disease 1-like 3 [Homo sapiens] [	0.00709565	8.0792	195767	31335117	2 (0 0 1 0 1)
vpu protein [Human immunodeficiency virus 1]	0.000931848	8.07904	105007	59003574	1 (0 1 0 0 0)
A Chain A, Solution Structure Of The Single-Stranded Dna-Binding Cold Shock Do	0.00441309	8.07553	8717.59	20150005	1 (0 1 0 0 0)
unnamed protein product [Homo sapiens]	0.00999744	8.07505	14857.2	34535833	1 (0 1 0 0 0)
immunoglobulin heavy chain variable region [Homo sapiens]	0.0023286	8.075	13442.4	114147441	1 (0 1 0 0 0)
envelope glycoprotein [Human immunodeficiency virus 1]	0.00650001	8.07412	27759.2	42540877	1 (0 1 0 0 0)
hypothetical protein [Homo sapiens]	0.00579462	8.07406	229116	51476593	3 (0 2 1 0 0)
pol protein [Human immunodeficiency virus 1]	0.00698808	8.07286	113123	86753463	1 (0 1 0 0 0)
unnamed protein product [Homo sapiens]	0.00986477	8.07053	23231.7	7023847	1 (0 1 0 0 0)
pol protein [Human immunodeficiency virus 1]	0.00961947	8.06963	43058.9	64165092	2 (0 0 1 0 1)
olfactory receptor, family 1, subfamily N, member 2 [Homo sapiens] [MAS	0.00483915	8.06887	35088.1	119607941	1 (0 1 0 0 0)
similar to Homo sapiens DMBT1 [Macaca mulatta]	0.00254586	8.06868	39340.2	4039157	1 (0 1 0 0 0)
envelope glycoprotein gp120 [Human immunodeficiency virus 1]	0.000880084	8.06735	13316	118623658	1 (0 1 0 0 0)
unnamed protein product [Homo sapiens]	0.0041207	8.06629	14256.8	21749795	1 (0 1 0 0 0)
envelope glycoprotein [Human immunodeficiency virus 2]	0.00703559	8.06616	14342.2	59797427	2 (0 0 1 0 1)
protease [Human immunodeficiency virus 1]	0.00153181	8.06598	10813.9	125745497	1 (0 1 0 0 0)
envelope glycoprotein [Human immunodeficiency virus 1]	0.00591569	8.06589	12789.6	116293391	1 (0 1 0 0 0)
zinc finger protein 285, isoform CRA_b [Homo sapiens]	0.00187555	8.06579	68189.9	119577675	1 (0 1 0 0 0)
SERTA domain containing 2 [Homo sapiens]	0.00627629	8.06533	33875.4	7661926	1 (0 1 0 0 0)
S100P binding protein isoform a [Homo sapiens]	0.00458721	8.06524	45553.8	62899075	1 (0 1 0 0 0)
envelope glycoprotein [Human immunodeficiency virus 1]	0.0019996	8.06512	12908.5	28916208	1 (0 1 0 0 0)
gag protein [Human immunodeficiency virus type 1] [	0.00833328	8.06487	14666.5	14573095	1 (0 1 0 0 0)
hCG1817308, isoform CRA_a [Homo sapiens]	0.00961027	8.06448	9116.66	119631486	1 (0 1 0 0 0)
pol protein [Human immunodeficiency virus 1]	0.00271188	8.06277	48169.9	70888411	1 (0 1 0 0 0)
truncated envelope glycoprotein [Human immunodeficiency virus 1]	0.00616503	8.06275	53343.2	93210969	2 (0 0 1 0 1)
Cytidylate kinase [Homo sapiens]	0.0083298	8.06268	25937.4	15928999	1 (0 1 0 0 0)
KIAA0754 protein [Homo sapiens]	0.00898939	8.06119	122265	20521149	3 (1 0 1 0 1)
hMYHbeta1 [Homo sapiens]	0.00670461	8.06098	58407.6	6691529	1 (0 1 0 0 0)
arginyltransferase 1 [Homo sapiens]	0.00986663	8.06065	24927.5	55962466	1 (0 1 0 0 0)
AF411819_1 putative ion channel protein CATSPER2 variant 3 [Homo sapiens]	0.00438192	8.06052	48310.3	16566359	1 (0 1 0 0 0)
hCG2045729 [Homo sapiens]	0.00507106	8.06034	12582.5	119624402	1 (0 1 0 0 0)
hCG27236, isoform CRA_a [Homo sapiens]	0.00139044	8.06024	18166.6	119584601	1 (0 1 0 0 0)
UL103 [Human herpesvirus 5 strain AD169]	0.00339284	8.05761	28617.8	9625789	1 (0 1 0 0 0)
protease [Human immunodeficiency virus type 1]	0.00944208	8.05522	10724.8	8895310	1 (0 1 0 0 0)
TPX2, microtubule-associated protein homolog [Homo sapiens]	0.00596405	8.05522	85600.1	20127519	2 (0 0 0 2 0)
CLN3 protein [Homo sapiens]	0.00339623	8.05483	15404.5	4102737	1 (0 1 0 0 0)
RAB18, member RAS oncogene family [Homo sapiens]	0.00444462	8.05468	22962.6	10880989	1 (0 1 0 0 0)
functional smad suppressing element 15 [Homo sapiens]	0.00916501	8.05441	93720.8	56121703	1 (0 1 0 0 0)
envelope polyprotein [Human immunodeficiency virus type 1]	0.00801034	8.0543	13692.9	327641	1 (0 1 0 0 0)
immunoglobulin heavy chain VHDJ region [Homo sapiens]	0.0070334	8.05384	12272.1	21668932	1 (0 1 0 0 0)
ACAT1 protein [Homo sapiens]	0.00907545	8.05136	17190.2	15012080	1 (0 1 0 0 0)
unnamed protein product [Homo sapiens]	9.38312e-05	8.05088	49272.1	16551493	1 (0 1 0 0 0)
ankyrin 1 isoform 4 variant [Homo sapiens]	0.00544758	8.05079	208278	62088416	1 (0 1 0 0 0)
PGH1_HUMAN Prostaglandin G/H synthase 1 precursor (Cyclooxygenase-1) (COX-1) (P	0.00304917	8.05008	68611.8	129899	1 (0 1 0 0 0)
envelope glycoprotein [Human immunodeficiency virus 1]	0.00675104	8.04782	32236.3	99029628	1 (0 1 0 0 0)
glutamate receptor, metabotropic 5 precursor [Homo sapiens]	0.00995359	8.04711	128791	4504143	2 (0 0 0 2 0)
hCG2036988 [Homo sapiens]	0.00463745	8.04545	10661.4	119605308	1 (0 1 0 0 0)
ZSC23_HUMAN Zinc finger and SCAN domain-containing protein 23 (Zinc finger p	0.00418776	8.04405	44927.2	121949042	1 (0 1 0 0 0)
microsomal epoxide hydrolase [Homo sapiens]	0.00040833	8.04382	7154.48	9454263	1 (0 1 0 0 0)
envelope glycoprotein [Human immunodeficiency virus 1]	0.00845502	8.04357	18879.5	34979157	1 (0 1 0 0 0)
tegument protein VP11/12 [Human herpesvirus 2]	0.00373719	8.04332	77660.8	9629316	1 (0 1 0 0 0)
vif protein [Human immunodeficiency virus 1]	0.00447725	8.04319	22529.8	112497803	1 (0 1 0 0 0)
proline-rich transmembrane protein 3, isoform CRA_a [Homo sapiens] [MAS	0.0079918	8.04279	65995	119584448	1 (0 1 0 0 0)
topoisomerase (DNA) III alpha [Homo sapiens]	0.00148324	8.04255	112300	10835218	1 (0 1 0 0 0)
yippee-like 3 [Homo sapiens]	0.00971651	8.04223	17466.7	117956405	1 (0 1 0 0 0)
putative p150 [Homo sapiens]	0.00324745	8.04156	149017	2072967	1 (0 1 0 0 0)
hCG2040430 [Homo sapiens]	0.00671296	8.04082	13381.2	119608946	2 (0 0 0 2 0)
pol protein [Human immunodeficiency virus 1]	0.00128198	8.04028	18022.4	124299452	1 (0 1 0 0 0)
ZN181_HUMAN Zinc finger protein 181 (HHZ181)	0.004769	8.03977	65799.6	91208389	1 (0 1 0 0 0)
put. tyrosinase preprotein [Homo sapiens]	0.00689399	8.03761	60625.3	37509	1 (0 1 0 0 0)
potassium intermediate/small conductance calcium-activated channel, sub	0.00506543	8.0357	48196.1	119605052	1 (0 1 0 0 0)
solute carrier family 12, member 6 isoform a [Homo sapiens]	0.000577591	8.03555	127534	110224449	1 (0 1 0 0 0)
envelope glycoprotein [Human immunodeficiency virus type 1]	0.00899228	6.16499	96768.6	17046569	6 (0 1 3 0 2)
POL precursor [Human immunodeficiency virus 1]	0.00476859	6.14752	60252.8	9756232	6 (1 1 1 0 3)
protease [Human immunodeficiency virus 1]	0.00230665	6.13851	10593.8	38350806	9 (2 3 1 1 2)
tubulin, alpha-like 3 [Homo sapiens]	0.00307973	6.11575	49875.8	119606853	4 (0 2 1 1 0)
ANUBL1 protein [Homo sapiens]	0.00881546	6.11501	71530.9	29124564	2 (1 0 1 0 0)
envelope glycoprotein [Human immunodeficiency virus 1]	0.00415	6.10841	31845	99029604	3 (1 0 1 1 0)
hCG1814183 [Homo sapiens]	0.00319915	6.09904	6106.81	119602135	9 (0 6 3 0 0)
S3TC1_HUMAN SH3 domain and tetratricopeptide repeats-containing protein 1	0.00152588	6.08985	146836	57013087	2 (0 0 0 1 1)
hypothetical protein LOC84910 [Homo sapiens]	0.00619414	6.0868	63494.8	14249524	3 (0 0 0 2 1)
H59433 DJ1100H13.4 protein [imported] - human	0.00682255	6.08527	27237.1	25535943	2 (0 0 0 1 1)
class V chitinase ChiB1 [Aspergillus fumigatus Af293]	0.00539913	6.08323	47592.4	70983075	2 (0 0 0 1 1)
phenylalanyl tRNA synthetase [Homo sapiens]	0.00737487	6.0744	66129.8	7768938	2 (0 0 0 1 1)
unnamed protein product [Homo sapiens]	0.00337065	6.07207	42165.8	22759985	3 (0 1 0 1 1)
ORF 73 [Human herpesvirus 8 type M]	0.00814265	6.06739	135132	18846043	2 (0 0 0 1 1)
putative BBLF3 protein [Human herpesvirus 4]	0.000220972	6.06663	79680.9	23893630	2 (0 0 0 1 1)
eukaryotic translation initiation factor 3 subunit 6 interacting protei	0.00267618	6.06313	66684.5	7705433	2 (0 0 0 1 1)
AF169035_1 protein kinase [Homo sapiens]	0.00875517	6.05791	48973.1	6466010	2 (0 0 0 1 1)
polyprotein [Human rhinovirus 36]	0.000943647	6.05632	52935.7	39655093	2 (0 0 0 1 1)
p24 [Human immunodeficiency virus 1]	0.00579001	6.04265	23514.9	7532457	2 (0 0 0 1 1)
AAH17505 Unknown (protein for IMAGE:4873434) [Homo sapiens]	0.00734204	6.02979	47974.2	17028387	4 (0 1 1 0 2)
unnamed protein product [Homo sapiens]	0.00459223	6.02786	46901.1	16550798	2 (0 0 0 1 1)
envelope glycoprotein [Human immunodeficiency virus 1]	0.00221447	4.10106	38900.1	45359551	2 (1 0 0 1 0)
X unnamed protein product [Homo sapiens]	0.00488959	4.06591	36898.3	134105134	2 (0 0 0 0 2)
advanced glycosylation end product-specific receptor isoform 2 precurs	0.00616052	4.06425	36170.7	26787962	4 (1 2 0 1 0)
envelope glycoprotein [Human immunodeficiency virus 1]	0.00618516	4.06216	95277.1	49617659	2 (0 1 0 1 0)
pol protein [Human immunodeficiency virus 1]	0.00854539	4.05634	113719	37682550	2 (0 0 0 0 2)
unnamed protein product [Homo sapiens]	0.00400533	2.0695	15192.8	34535308	2 (0 1 0 0 1)

## Sheet: Control_2_UT
Description	P-value	Score	MW	Accession	Peptide (Hits)
glial fibrillary acidic protein [Homo sapiens]	4.61717e-11	390.231	49849.7	4503979	103 (81 10 9 0 3)
2',3'-cyclic-nucleotide 3'-phosphodiesterase (EC 3.1.4.37)	3.18843e-09	292.23	45070.4	180687	84 (68 8 7 1 0)
I38369 beta-tubulin - human (fragment)	7.66054e-14	248.232	48848.5	2119276	125 (105 13 3 1 3)
neurofilament, medium polypeptide 150kDa [Homo sapiens]	9.43335e-09	226.331	102386	4885513	33 (29 2 0 2 0)
neurofilament, light polypeptide 68kDa [Homo sapiens]	1.11413e-06	226.207	61479.3	105990539	31 (28 2 1 0 0)
KIAA0325 protein [Homo sapiens]	1.33214e-07	166.175	533404	71891782	21 (10 6 3 1 1)
brain creatine kinase [Homo sapiens]	6.96796e-11	164.246	42617.4	21536286	60 (51 4 0 5 0)
tubulin, beta 4 [Homo sapiens]	3.43059e-13	158.281	49553.9	21361322	114 (84 27 2 1 0)
N-ethylmaleimide-sensitive factor [Homo sapiens]	1.13095e-08	154.249	82602.2	11079228	25 (20 1 0 3 1)
tubulin alpha 6 [Homo sapiens]	8.94048e-10	152.256	49863.5	14389309	92 (81 4 3 3 1)
syntaxin binding protein 1 isoform a [Homo sapiens]	4.09315e-08	152.189	68692.3	4507297	22 (17 1 1 1 2)
KIAA0968 protein [Homo sapiens]	6.01899e-08	122.175	58985.2	4589580	66 (47 7 6 4 2)
A Chain A, Crystal Structure Of A DictyosteliumTETRAHYMENA CHIMERA Actin (Mutan	2.21172e-08	116.175	41719.9	7245526	32 (23 3 2 0 4)
tubulin, beta, 4 [Homo sapiens]	3.71297e-11	112.241	50400.3	50592996	43 (26 15 0 1 1)
ATP synthase, H+ transporting, mitochondrial F1 complex, alpha subunit	6.75167e-13	110.252	59713.7	4757810	22 (20 1 0 0 1)
myelin basic protein isoform 1 [Homo sapiens]	5.3025e-07	96.1642	21480	68509930	30 (26 2 2 0 0)
A40671 dynamin, internal form 1, long C-terminal form - human [M	5.52342e-07	90.194	97201	539580	11 (7 3 1 0 0)
proteolipid protein [Rattus norvegicus]	0.00031046	88.1746	30057.1	13591880	35 (31 3 1 0 0)
brain abundant, membrane attached signal protein 1 [Homo sapiens]	5.37909e-09	86.1914	22680	30795231	14 (12 0 1 1 0)
protein kinase C, gamma [Homo sapiens]	6.13688e-07	80.1822	78397.3	13384594	9 (9 0 0 0 0)
calcium/calmodulin-dependent protein kinase IIB isoform 8 [Homo sapien	1.83617e-08	78.1657	50923	26051218	27 (22 1 3 0 1)
GNAO2_HUMAN Guanine nucleotide-binding protein G(o) subunit alpha 2	3.61233e-06	78.1404	40061.1	60416433	11 (9 0 1 0 1)
ATRB actin, skeletal muscle - rabbit	2.88368e-05	72.1922	41789.8	71611	19 (14 3 1 1 0)
heat shock 90kDa protein 1, beta [Homo sapiens]	0.000592338	72.1215	83212.2	20149594	13 (3 4 2 1 3)
unknown [Homo sapiens]	1.07585e-09	70.2109	268547	62988842	8 (5 2 0 1 0)
microtubule-associated protein 1B isoform 1 [Homo sapiens]	1.04936e-10	70.203	270452	5174525	9 (7 0 1 1 0)
G02520 plectin - human	5.52143e-06	70.183	518172	7442004	13 (3 1 3 4 2)
tubulin, alpha-like 3 [Homo sapiens]	2.87225e-06	70.1251	49876.8	13376181	25 (16 4 5 0 0)
tyrosine 3-monooxygenase/tryptophan 5-monooxygenase activation protein,	3.39595e-08	68.1548	28064.8	4507949	18 (11 2 3 1 1)
KIAA0417 [Homo sapiens]	2.32858e-09	66.1924	78381.4	2887409	9 (7 1 1 0 0)
tyrosine 3/tryptophan 5 -monooxygenase activation protein, epsilon poly	2.24399e-06	66.1264	29155.4	5803225	8 (7 0 1 0 0)
contactin 1 isoform 1 precursor [Homo sapiens]	3.59149e-06	66.097	113249	28373117	7 (5 2 0 0 0)
internexin neuronal intermediate filament protein, alpha [Homo sapiens	0.000162673	64.1471	55357.5	14249342	10 (6 1 2 1 0)
S68466 translation elongation factor EF-Tu-like protein P43 precursor, mitochondria	3.50399e-07	62.1802	49502.2	7443384	8 (5 0 0 3 0)
unnamed protein product [Homo sapiens]	1.72149e-07	62.1495	57919.5	28940	8 (4 1 1 2 0)
tubulin, alpha 1B [Mus musculus]	1.65423e-13	60.2692	50119.6	34740335	38 (36 2 0 0 0)
histone H2B [Homo sapiens]	6.93365e-07	60.213	13927.6	1568557	10 (7 1 0 0 2)
Na+/K+ -ATPase alpha 2 subunit proprotein [Homo sapiens]	8.05563e-09	60.1653	112194	4502271	8 (8 0 0 0 0)
protein kinase C, alpha [Homo sapiens]	2.99124e-05	60.1294	76714.2	4506067	7 (6 0 0 1 0)
tubulin, beta 2 [Homo sapiens]	1.06628e-07	58.2102	49875	4507729	26 (24 2 0 0 0)
ubiquitin-activating enzyme E1 [Homo sapiens]	3.17095e-06	58.1385	117774	23510338	6 (5 1 0 0 0)
unnamed protein product [Homo sapiens]	4.11176e-05	58.1171	52406.5	21757045	8 (3 3 1 1 0)
tyrosine 3-monooxygenase/tryptophan 5-monooxygenase activation protein,	6.01018e-10	54.1758	28284.9	9507245	6 (4 1 1 0 0)
SPTAN1 protein [Homo sapiens]	0.00312376	54.1139	282106	31565122	6 (4 1 1 0 0)
unnamed protein product [Homo sapiens]	1.26454e-08	52.2022	49811	10433717	22 (9 5 5 2 1)
crystallin, alpha B [Homo sapiens]	0.000193141	50.1569	20146.4	4503057	5 (5 0 0 0 0)
synaptosomal-associated protein 25 isoform SNAP25A [Homo sapiens]	1.10828e-05	48.1749	23321.2	18765733	5 (4 1 0 0 0)
Na+/K+ -ATPase beta 1 subunit isoform a [Homo sapiens]	0.000587294	48.0972	35038.9	4502277	8 (5 2 0 1 0)
eukaryotic translation elongation factor 1 alpha 1 [Homo sapiens]	3.6203e-05	46.1265	50109.2	4503471	6 (3 3 0 0 0)
voltage-dependent anion channel 1 [Homo sapiens]	2.4499e-06	42.1806	30753.6	4507879	6 (5 0 0 0 1)
glyceraldehyde-3-phosphate dehydrogenase [Homo sapiens]	1.24895e-07	42.1545	36030.4	7669492	7 (3 2 2 0 0)
Thy-1 cell surface antigen [Homo sapiens]	2.18257e-07	40.1843	17923.3	19923362	8 (7 0 1 0 0)
dihydropyrimidinase-like 2 [Homo sapiens]	3.91265e-06	40.1105	62254.7	4503377	4 (4 0 0 0 0)
heavy neurofilament subunit [Homo sapiens]	2.80079e-05	40.0981	111713	1841430	5 (3 0 1 1 0)
cofilin 1 (non-muscle) [Homo sapiens]	3.12822e-07	38.2093	18490.7	5031635	5 (4 1 0 0 0)
microtubule-associated protein 2 [Homo sapiens]	0.000164902	38.1432	199045	1850617	5 (1 2 2 0 0)
ANK2_HUMAN Ankyrin-2 (Brain ankyrin) (Ankyrin-B) (Ankyrin, nonerythroid)	2.99451e-05	38.1431	430079	1703310	7 (2 0 1 2 2)
hypothetical protein [Homo sapiens]	0.00462437	38.1014	295648	5541863	6 (1 2 1 1 1)
ubiquinol-cytochrome c reductase core protein II [Homo sapiens]	5.15349e-08	38.0731	48412.9	50592988	4 (3 1 0 0 0)
raptor [Homo sapiens]	0.00139765	38.0703	148942	22094987	7 (3 1 1 1 1)
A Chain A, Human Vimentin Coil 2b Fragment (Cys2)	1.5769e-06	36.1614	9901.82	20149836	6 (2 3 0 0 1)
integrin alpha M precursor [Homo sapiens]	0.00117969	36.1204	127099	88501734	8 (2 3 0 2 1)
DPYL4_HUMAN Dihydropyrimidinase-related protein 4 (DRP-4) (Collapsin response	0.000189951	34.1983	61838.5	68067941	5 (2 2 1 0 0)
heat shock protein 90kDa alpha (cytosolic), class A member 1 isoform 2	4.94667e-08	34.1842	84620.7	40254816	4 (3 0 0 1 0)
VDAC2 [Homo sapiens]	2.16175e-05	34.1646	30393	48146045	6 (5 0 0 1 0)
unnamed protein product [Homo sapiens]	1.06668e-07	34.1549	35738.8	32486	6 (5 0 0 1 0)
unnamed protein product [Homo sapiens]	0.000457424	34.0775	149049	34532097	6 (1 2 1 0 2)
voltage-dependent L-type Ca channel alpha 1 subunit [Homo sapiens]	0.00599843	32.0905	239398	508195	5 (1 1 2 0 1)
novel protein similar to human ankyrin repeat and sterile alpha motif	0.000476197	32.0815	141405	148725497	5 (1 2 0 1 1)
Putative helicase with limited sequence similarity to human Rb protein;	0.00332587	32.0727	162942	6323451	5 (0 2 2 1 0)
kelch-like 8 [Homo sapiens]	0.0045978	32.0582	68757.9	34101268	6 (2 3 0 1 0)
phosphofructokinase, platelet [Homo sapiens]	1.74729e-10	30.1968	85541.6	11321601	4 (4 0 0 0 0)
tyrosine 3/tryptophan 5 -monooxygenase activation protein, zeta polypep	1.16315e-10	30.1854	27727.7	4507953	8 (8 0 0 0 0)
N Chain N, Mutant Monomer Of Recombinant Human Hexokinase Type I Complexed With	7.31703e-06	30.1664	102383	7245424	4 (4 0 0 0 0)
guanine nucleotide-binding protein, beta-1 subunit [Mus musculus]	0.000427617	30.1184	37353	6680045	5 (5 0 0 0 0)
karyopherin beta 1 [Homo sapiens]	7.35984e-08	30.115	97108.2	19923142	3 (3 0 0 0 0)
POLG_POL1S Genome polyprotein [Contains: Capsid protein VP4 (P1A) (Virion prote	0.00121781	30.1018	246418	130499	4 (0 3 1 0 0)
heat shock 27kDa protein 1 [Homo sapiens]	1.25707e-06	30.1011	22768.5	4504517	3 (3 0 0 0 0)
aldehyde dehydrogenase 5A1 precursor, isoform 2 [Homo sapiens]	3.32889e-06	30.0977	57178.4	4507229	3 (3 0 0 0 0)
KIAA0987 protein [Homo sapiens]	0.0012249	30.0654	123629	4589618	3 (3 0 0 0 0)
hypothetical protein LOC348654 [Homo sapiens]	0.00926487	30.0609	102819	47271493	3 (3 0 0 0 0)
gelsolin isoform a precursor [Homo sapiens]	5.64769e-09	28.1657	85644.2	4504165	4 (2 0 0 2 0)
B Chain B, T-To-T(High) Quaternary Transitions In Human Hemoglobin: Deshis146b	0.000198953	28.1633	15720.2	61679604	3 (2 1 0 0 0)
S38532 protein 14-3-3 eta chain - human	1.66812e-05	28.1313	28172	481365	6 (2 3 0 1 0)
mysoin heavy chain 12 [Homo sapiens]	1.06223e-05	28.1195	215196	1770741	6 (1 0 2 0 3)
claudin 11 [Homo sapiens]	0.000438273	28.0945	21978.4	10938016	8 (5 0 1 0 2)
pericentriolar material 1, isoform CRA_a [Homo sapiens]	0.000209438	28.0936	228386	119584200	3 (2 1 0 0 0)
Large protein [Human parainfluenza virus 2]	0.000244484	28.0832	256218	19525727	7 (2 1 1 2 1)
truncated envelope glycoprotein [Human immunodeficiency virus 2]	0.00231974	28.0654	68220.1	83656829	3 (2 1 0 0 0)
envelope glycoprotein [Human immunodeficiency virus 1]	0.00875449	28.065	97331.9	38491887	3 (2 1 0 0 0)
histone H2A [Homo sapiens]	4.13416e-09	26.2803	13986.8	28195394	15 (13 1 1 0 0)
tubulin, beta, 2 [Homo sapiens]	1.00032e-08	26.2043	49799	5174735	17 (4 5 7 1 0)
similar to GenBank Accession Number AF045184 nuclear receptor coactivato	0.00076305	26.197	25758.4	29841015	18 (4 5 3 5 1)
microtubule-associated protein, RP/EB family, member 2 [Homo sapiens]	5.99972e-05	26.1967	37008.2	10346135	4 (1 1 1 0 1)
adenylyl cyclase-associated protein 2 [Homo sapiens]	0.000145106	26.1431	52790.9	5453593	4 (1 1 1 0 1)
tubulin, alpha 4 [Mus musculus]	1.57924e-05	26.1221	49892.4	6678467	5 (4 0 1 0 0)
phosphoglycerate mutase family 3 [Homo sapiens]	0.00344765	26.0821	28758.8	71274132	3 (2 0 1 0 0)
PSD3_HUMAN PH and SEC7 domain-containing protein 3 (Pleckstrin homology and S	0.00035415	26.0741	60155.8	42560198	3 (1 2 0 0 0)
ubiquitously transcribed tetratricopeptide repeat, X chromosome [Homo	0.00374323	26.0667	154134	10863943	4 (0 1 3 0 0)
TBB4Q_HUMAN Tubulin beta-4q chain	2.22772e-05	24.1436	48403.5	12643363	6 (2 3 1 0 0)
glutamate transporter [Homo sapiens]	0.0023377	24.1078	61664.6	488752	8 (1 1 1 3 2)
envelope glycoprotein [Human immunodeficiency virus type 1]	0.00746816	24.1062	97312.9	1079599	3 (0 3 0 0 0)
SYN2_HUMAN Synapsin-2 (Synapsin II)	0.000918655	24.1018	62928.8	6686022	3 (2 0 0 1 0)
KIAA0318 [Homo sapiens]	0.00628154	24.0931	122245	2224577	3 (1 1 1 0 0)
guanine nucleotide-binding protein, beta-2 subunit [Mus musculus]	0.000142261	22.1405	37307.1	13937391	3 (2 0 0 0 1)
immunity-related GTPase family, cinema [Homo sapiens]	0.0060931	22.1077	50256.9	10257429	3 (0 2 1 0 0)
phosphoglycerate mutase 1 (brain) [Homo sapiens]	0.0010837	22.104	28785.8	4505753	3 (2 0 0 0 1)
DNA topoisomerase II, alpha isozyme [Homo sapiens]	0.00231903	22.0995	174275	19913406	4 (1 0 1 1 1)
unnamed protein product [Homo sapiens]	0.000275004	22.0951	63237.6	22760682	3 (1 0 2 0 0)
synapsin I isoform Ia [Homo sapiens]	0.00238672	22.0923	74065.8	19924099	3 (1 1 0 1 0)
KIAA0338 [Homo sapiens]	0.000333316	22.0921	103516	2224617	3 (2 0 0 0 1)
isocitrate dehydrogenase (NADP+) [Homo sapiens] [MAS	0.00268026	22.0837	50915.9	872121	4 (2 1 0 0 1)
de-ubiquitinase [Homo sapiens]	0.00259816	22.0835	95683.4	1122278	3 (1 0 2 0 0)
KIAA0041 [Homo sapiens]	0.00193267	22.0808	88243.3	27529706	3 (1 0 2 0 0)
CX020_HUMAN Uncharacterized protein CXorf20	0.00720134	22.0794	87863.2	71153248	4 (0 2 0 1 1)
envelope glycoprotein [Human immunodeficiency virus 1]	0.00778699	22.0721	96658.6	90993305	4 (1 0 3 0 0)
ATP synthase, H+ transporting, mitochondrial F1 complex, gamma subu	0.000111276	22.0714	32975.3	50345988	3 (1 1 0 1 0)
zinc finger and SCAN domain containing 10 [Homo sapiens]	0.00477035	22.0654	80336	14249488	3 (1 0 2 0 0)
hypothetical protein LOC562048 [Danio rerio]	0.000155764	22.056	253226	71834474	4 (1 1 0 0 2)
WD repeat-containing protein 1 isoform 1 [Homo sapiens]	3.05406e-05	22.0456	66151.9	9257257	3 (2 0 0 0 1)
mitogen-activated protein kinase kinase 1 [Homo sapiens]	5.79724e-09	20.2262	43411.3	5579478	2 (2 0 0 0 0)
collapsin response mediator protein 1 isoform 2 [Homo sapiens]	2.83792e-05	20.1978	62144.8	4503051	3 (2 1 0 0 0)
beta actin [Homo sapiens]	6.14058e-07	20.187	41709.7	4501885	8 (8 0 0 0 0)
ubiquitin carboxyl-terminal esterase L1 (ubiquitin thiolesterase) [Hom	1.39397e-08	20.1777	24808.5	21361091	3 (3 0 0 0 0)
carbonyl reductase 1 [Homo sapiens]	0.00119998	20.1767	30355.9	4502599	3 (3 0 0 0 0)
voltage-dependent anion channel 3 [Homo sapiens]	1.20451e-08	20.1749	30639.3	25188179	2 (2 0 0 0 0)
NKX61_HUMAN Homeobox protein Nkx-6.1	0.00874336	20.1575	37825.1	6016211	2 (2 0 0 0 0)
unnamed protein product [Homo sapiens]	0.00270746	20.1542	40513	7021051	7 (1 2 1 1 2)
A Chain A, Crystal Structure Of Caenorhabditis Elegans Mg-Atp Actin Complexed	0.00107369	20.1541	41637.7	14278147	3 (1 1 0 0 1)
H4 histone family, member A [Homo sapiens]	1.74965e-05	20.1509	11360.4	4504301	3 (3 0 0 0 0)
Human Diff6,H5,CDC10 homologue [Homo sapiens]	0.00023582	20.1269	46555.7	1040689	3 (1 0 1 1 0)
phosphoglycerate mutase 2 (muscle) [Homo sapiens] [M	5.06499e-05	20.1228	28201.4	51094513	2 (2 0 0 0 0)
cytochrome c oxidase subunit Vb precursor [Homo sapiens]	5.87454e-05	20.1214	13686.9	17017988	2 (2 0 0 0 0)
unnamed protein product [Homo sapiens]	0.00127189	20.1195	37032.8	7022365	4 (2 0 1 1 0)
A Chain A, The 1.9-A Crystal Structure Of The Noncollagenous (Nc1) Domain Of H	0.00168042	20.1092	25314	21466080	2 (2 0 0 0 0)
RAB3A, member RAS oncogene family [Homo sapiens]	0.00043963	20.1034	24968.1	4506367	2 (2 0 0 0 0)
prohibitin [Homo sapiens]	0.00436245	20.0877	29785.9	4505773	2 (2 0 0 0 0)
glucose phosphate isomerase [Homo sapiens]	0.0077436	20.0821	63107.3	18201905	2 (2 0 0 0 0)
cell division cycle 10 [Bos taurus]	0.000147424	20.071	48727.1	47564098	2 (2 0 0 0 0)
small nuclear RNA activating complex, polypeptide 3, 50kDa [Homo sa	0.00147048	20.0652	46722.7	89242152	3 (3 0 0 0 0)
hemagglutinin-neuraminidase [Human parainfluenza virus 1]	0.00859367	20.0577	63764.5	1621401	3 (2 0 1 0 0)
unnamed protein product [Homo sapiens]	0.00432759	20.0573	64734.2	21758470	2 (2 0 0 0 0)
DCLK1_HUMAN Serine/threonine-protein kinase DCLK1 (Doublecortin-like and CAM k	6.04679e-05	20.0514	82173	6225242	3 (0 1 2 0 0)
basic helix-loop-helix transcription factor 15 [Homo sapiens]	0.00342214	20.0444	20817.7	48255909	2 (2 0 0 0 0)
microsomal glutathione S-transferase 3 [Homo sapiens]	6.36456e-06	18.1902	16505.6	4758714	5 (4 1 0 0 0)
AF470976_1 pol polyprotein [Human immunodeficiency virus type 1]	0.000186751	18.1794	41160.8	21686054	9 (1 2 4 1 1)
hypothetical protein [Human calicivirus Hu/NLV/Queen's Arms/Leeds/92/UK	0.00195182	18.1606	22089.1	14330431	10 (1 6 2 1 0)
CE152_HUMAN Centrosomal protein of 152 kDa (Cep152 protein)	0.00783702	18.1379	147252	62286590	8 (0 2 3 2 1)
polyprotein [Human rhinovirus 74]	0.00751788	18.1376	242658	95102504	2 (1 1 0 0 0)
giantin [Homo sapiens]	0.00177609	18.1356	375846	405715	7 (1 4 1 0 1)
calcium/calmodulin-dependent protein kinase II delta isoform 1 [Homo s	9.86753e-05	18.1326	54093.6	26667183	2 (1 1 0 0 0)
EHD3_HUMAN EH domain-containing protein 3	2.35289e-09	18.1215	61857.2	18203332	2 (1 1 0 0 0)
ADP-ribosylation factor 3 [Homo sapiens]	6.73535e-05	18.1103	20587.7	4502203	2 (1 1 0 0 0)
ADP-ribosylation factor 5 [Homo sapiens]	0.00111475	18.1035	20516.6	4502209	2 (1 1 0 0 0)
human MLK (Mixed Lineage Kinase) homolog family member (mlk-1) [Caenor	0.00962222	18.0942	115401	25149255	3 (0 1 1 1 0)
ribosomal protein S6 kinase, 90kDa, polypeptide 3 [Homo sapiens]	0.00680709	18.0878	83683.1	4759050	3 (1 1 0 1 0)
unnamed protein product [Homo sapiens]	0.0034912	18.0859	122059	10433976	3 (0 1 1 1 0)
hCG2040889 [Homo sapiens]	0.00797741	18.0849	8631.34	119583581	2 (1 1 0 0 0)
cardiomyopathy associated 1 [Homo sapiens]	0.00343399	18.0812	198438	40255272	2 (1 1 0 0 0)
SEC63-like protein [Homo sapiens]	0.00527679	18.0786	87941.5	6005872	2 (1 1 0 0 0)
polyprotein [Human enterovirus B]	0.003726	18.071	245115	60547983	3 (1 0 0 2 0)
L1 protein [Human papillomavirus type 106]	0.000107969	18.0694	63228.7	71726717	3 (1 2 0 0 0)
JC7973 synleurin - human	0.00931366	18.0692	70257	60729628	3 (0 2 0 0 1)
coiled-coil domain containing 87 [Homo sapiens]	0.00811288	18.0685	96412.8	8922669	2 (1 1 0 0 0)
REV3-like, catalytic subunit of DNA polymerase zeta [Homo sapiens]	0.00335281	18.0684	352565	145312262	2 (1 1 0 0 0)
hCG1811379, isoform CRA_b [Homo sapiens]	0.00187112	18.0683	159915	119625210	4 (1 0 2 0 1)
hypothetical protein LOC78995 [Homo sapiens]	0.008227	18.0667	69727.4	31543179	3 (0 1 1 1 0)
brain carboxylesterase hBr2 [Homo sapiens]	0.00428443	18.0666	61922.8	19071816	2 (1 1 0 0 0)
KIAA0884 protein [Homo sapiens]	0.00452914	18.0594	105638	4240257	2 (1 1 0 0 0)
gp120 [Human immunodeficiency virus 1]	0.00248324	18.0543	40186.8	28172460	2 (1 1 0 0 0)
hCG1818607, isoform CRA_c [Homo sapiens]	0.006852	18.0415	193283	119579061	2 (1 1 0 0 0)
aquaporin 4 isoform a [Homo sapiens]	9.68037e-11	16.2426	34806.9	4502181	2 (1 0 1 0 0)
human PGP 9.5 homologue [cattle, Peptide Partial, 25 aa]	0.000843922	16.1442	2810.49	236733	2 (1 0 1 0 0)
hypothetical protein PY05621 [Plasmodium yoelii yoelii str. 17XNL]	0.00155839	16.1275	72421.8	82596043	2 (1 0 1 0 0)
STX1B_HUMAN Syntaxin-1B1 (Syntaxin 1B)	0.00109343	16.1208	33410.1	2501085	2 (1 0 1 0 0)
unnamed protein product [Homo sapiens]	0.00142531	16.1159	14846.6	37848	4 (2 0 1 0 1)
AF293359_1 desmocollin 3a [Homo sapiens]	0.00484857	16.1123	99950.3	10801205	2 (1 0 1 0 0)
KIAA1097 protein [Homo sapiens]	0.00240018	16.0987	110871	5689531	2 (1 0 1 0 0)
aconitase 2 precursor [Homo sapiens]	0.00940678	16.0934	85372	4501867	3 (1 0 0 1 1)
ryanodine receptor type 3 [Homo sapiens]	0.000920056	16.0924	22952.2	405719	5 (2 2 1 0 0)
dynein, cytoplasmic, light intermediate polypeptide 2 [Homo sapiens]	2.15508e-05	16.0861	54065.6	5453634	2 (1 0 1 0 0)
KIAA1274 protein [Homo sapiens]	0.00966067	16.0807	97294.6	20521820	2 (0 2 0 0 0)
gp160 [Human immunodeficiency virus 1]	0.000372904	16.0786	98339.1	18996200	5 (1 1 1 0 2)
regulator of G-protein signalling 3 isoform 2 [Homo sapiens]	0.00629318	16.0723	56566.5	10864075	2 (0 2 0 0 0)
AF228313_1 tyrosine kinase LCK [Homo sapiens]	0.00767294	16.0721	56559.5	6984209	3 (0 1 1 0 1)
novel protein similar to human and mouse MAM domain containing 2 (MAMD	0.00127267	16.0721	76891.4	126632588	3 (1 0 1 1 0)
centrosomal protein 2 isoform 1 [Homo sapiens]	0.00376941	16.0677	280966	21735548	4 (1 0 0 0 3)
A33899 protein-tyrosine-phosphatase (EC 3.1.3.48), nonreceptor type 2 - human	0.00679235	16.0672	48442.4	88523	3 (1 0 0 1 1)
A Chain A, Human Plasminogen Activator Inhibitor Type-1 In Complex With A Penta	0.00454641	16.0589	42799.9	4699714	3 (0 1 1 0 1)
family with sequence similarity 51, member A1 [Homo sapiens]	0.00050119	16.0578	28618.6	8923481	2 (0 2 0 0 0)
neural cell adhesion molecule 1 isoform 3 [Homo sapiens]	7.06688e-09	14.1761	83718	115529478	2 (1 0 0 1 0)
origin recognition complex, subunit 2 [Homo sapiens]	0.00928874	14.1576	65931	5453830	9 (2 1 1 1 4)
erythrocyte membrane protein band 4.1-like 2 [Homo sapiens]	0.000289826	14.1347	112519	4503579	2 (1 0 0 1 0)
KIAA1725 protein [Homo sapiens]	0.000382809	14.1303	114563	12697995	2 (0 1 1 0 0)
contactin associated protein 1 [Homo sapiens]	0.000229588	14.117	156167	4505463	2 (1 0 0 1 0)
heat shock 70kDa protein 9B precursor [Homo sapiens]	0.000243545	14.1169	73634.8	24234688	2 (1 0 0 1 0)
unnamed protein product [Homo sapiens]	0.00515553	14.1091	41163.2	21758807	2 (1 0 0 1 0)
neurolysin [Homo sapiens]	0.00169246	14.0985	80599.8	14149738	5 (1 1 0 2 1)
PDE11_HUMAN Dual 3',5'-cyclic-AMP and -GMP phosphodiesterase 11A (cAMP and cG	0.00969565	14.0877	104744	74752809	2 (1 0 0 1 0)
Clock [Homo sapiens]	0.00493484	14.0816	40267	2326259	3 (1 1 0 1 0)
unnamed protein product [Homo sapiens]	0.00329672	14.0754	61891.4	10434915	2 (0 1 1 0 0)
matrix metalloproteinase 24 preproprotein [Homo sapiens]	0.0049675	14.0752	73185.3	5729929	3 (0 1 0 1 1)
cytochrome P450, family 17 [Homo sapiens]	0.00994926	14.0729	57334.3	4503195	3 (1 0 1 1 0)
unnamed protein product [Homo sapiens]	0.00425137	14.0706	102904	34533419	2 (1 0 0 1 0)
polyprotein [Human coxsackievirus A18]	0.00230608	14.0684	246272	73912032	3 (0 0 1 2 0)
envelope glycoprotein [Human immunodeficiency virus type 1]	0.0048071	14.066	19088.8	3659655	2 (0 1 1 0 0)
hypothetical protein LOC286077 [Homo sapiens] [MA	0.00244119	14.0656	127023	87080811	2 (0 1 1 0 0)
NPA1P_HUMAN Nucleolar preribosomal-associated protein 1	0.00611281	14.0649	252156	12644073	3 (1 0 0 1 1)
AT rich interactive domain 5B (MRF1-like) [Homo sapiens]	0.00404933	14.0628	132292	74136549	3 (0 0 1 2 0)
IKKA_HUMAN Inhibitor of nuclear factor kappa-B kinase subunit alpha (I kappa-	0.00234574	14.0609	84599	14285498	2 (0 1 1 0 0)
L2 [Human papillomavirus type 93]	0.000497682	14.0599	56974.1	37089396	2 (1 0 0 1 0)
phosphoglycerate kinase 1 [Homo sapiens]	0.00811024	14.0594	44586.2	4505763	2 (1 0 0 1 0)
G01627 androgen receptor 1 - human	0.0060207	14.0561	78119	7512281	2 (0 1 1 0 0)
KIAA1138 protein [Homo sapiens]	0.00368408	14.049	133007	6329915	2 (1 0 0 1 0)
ZNF658 protein [Homo sapiens]	0.00771603	14.0482	71087.4	45708593	3 (0 1 1 1 0)
unnamed protein product [Homo sapiens]	0.00606255	14.048	90284	34532295	2 (0 1 1 0 0)
NPR-Bi [Homo sapiens]	0.00250973	14.0465	111138	3059111	2 (1 0 0 1 0)
hCG1747788 [Homo sapiens]	0.00331162	12.1696	14554.8	119608911	10 (0 0 8 2 0)
ras homolog gene family, member G [Mus musculus]	2.37934e-06	12.1299	21294.9	9625037	3 (2 0 0 0 1)
Na+/K+ -ATPase alpha 1 subunit isoform a proprotein [Homo sapiens]	2.72379e-06	12.1093	112824	21361181	2 (1 0 0 0 1)
hCG1782152 [Homo sapiens]	0.00673724	12.0972	34623.8	119597568	2 (1 0 0 0 1)
KIAA0368 [Homo sapiens]	0.00327134	12.0919	159375	2224677	3 (1 0 1 0 1)
EXO1_HUMAN Exonuclease 1 (hExo1) (Exonuclease I) (hExoI)	0.00220748	12.0902	94044.6	85700954	2 (0 1 0 1 0)
KIAA0423 [Homo sapiens]	0.00176673	12.0884	189595	20521047	2 (1 0 0 0 1)
UTP14, U3 small nucleolar ribonucleoprotein, homolog C [Homo sapiens]	0.00420225	12.0861	87134.6	51871374	3 (0 1 0 0 2)
unnamed protein product [Homo sapiens]	0.000334065	12.0811	123394	18676845	3 (0 1 0 0 2)
hCG16339 [Homo sapiens]	0.000476354	12.0799	35465.7	119587899	2 (0 1 0 1 0)
contactin 6 [Homo sapiens]	0.00118409	12.0798	113885	7657361	2 (0 1 0 1 0)
fibrinogen, alpha polypeptide isoform alpha-E preproprotein [Homo sapie	0.00114263	12.0787	94914.3	4503689	2 (1 0 0 0 1)
glutamine-fructose-6-phosphate transaminase 2 [Homo sapiens]	0.00308017	12.0757	76881.9	4826742	2 (1 0 0 0 1)
gp120 [Human immunodeficiency virus 1]	0.0064747	12.0745	37823.8	28172468	2 (0 0 2 0 0)
Naf1 beta protein [Homo sapiens]	0.00906619	12.0688	71743.8	3758821	2 (0 1 0 1 0)
PLSB_HUMAN Glycerol-3-phosphate acyltransferase, mitochondrial precursor (GPA	0.00503932	12.0661	93735.6	59803040	3 (0 0 1 1 1)
hypothetical protein LOC79684 [Homo sapiens]	0.00744008	12.064	55368.9	13375860	2 (0 1 0 1 0)
hypothetical protein [Homo sapiens]	0.00582456	12.0636	103608	31874020	3 (1 0 1 0 1)
prolyl 4-hydroxylase, beta subunit precursor [Homo sapiens]	0.00649031	12.0608	57080.8	20070125	2 (0 1 0 1 0)
Mitochondrial protein, forms a heterodimer complex with Mto1p that perf	0.000224635	12.0598	58315.7	6323665	2 (1 0 0 0 1)
O12D2_HUMAN Olfactory receptor 12D2 (Olfactory receptor OR6-28) (Hs6M1-20)	0.00259367	12.0592	34849.2	14423788	2 (1 0 0 0 1)
GTPase-activating protein [Homo sapiens]	0.00646365	12.0585	112165	2389009	3 (0 2 0 1 0)
similar to protein phosphatase 1, regulatory (inhibitor) subunit 12B i	0.0063523	12.0575	39400.3	37546669	3 (0 0 1 1 1)
MTA1_HUMAN Metastasis-associated protein MTA1	0.00385807	12.0544	80737.4	2498589	2 (0 0 2 0 0)
DNA directed RNA polymerase II polypeptide B [Homo sapiens]	0.00938217	12.0499	133811	4505941	3 (0 0 1 1 1)
KIAA1575 protein [Homo sapiens]	0.00291018	12.0444	107978	27529915	2 (0 0 2 0 0)
DnaJ (Hsp40) homolog, subfamily C, member 3 [Homo sapiens]	0.00161147	12.0374	57544.2	5453980	2 (0 1 0 1 0)
H2A histone family, member O [Homo sapiens]	7.13484e-09	10.2533	14086.9	4504251	4 (4 0 0 0 0)
unnamed protein product [Homo sapiens]	1.47878e-07	10.1895	39566.4	10435335	3 (3 0 0 0 0)
tubulin, alpha 1a [Mus musculus]	4.23382e-05	10.1879	49927.7	6678465	4 (4 0 0 0 0)
ATPase, H+ transporting, lysosomal, V0 subunit c [Homo sapiens]	6.19486e-08	10.1848	15725.5	4502313	1 (1 0 0 0 0)
H2A histone family, member A [Homo sapiens]	1.02249e-05	10.165	14127	10645195	3 (3 0 0 0 0)
neurofilament-66; NF-66 [Homo sapiens]	4.69567e-06	10.1537	54875.2	994844	1 (1 0 0 0 0)
lanthionine synthetase C-like protein 1 [Homo sapiens]	0.000400735	10.1529	45253.6	5174445	2 (2 0 0 0 0)
neurofilament, light polypeptide 68kDa, isoform CRA_b [Homo sapiens] [M	0.0017233	10.1482	56924	119584005	1 (1 0 0 0 0)
mitogen-activated protein kinase kinase 2 [Homo sapiens]	0.00118337	10.1475	44396.1	13489054	1 (1 0 0 0 0)
hCG2041853 [Homo sapiens]	0.00417616	10.1446	12109.1	119606879	1 (1 0 0 0 0)
creatine kinase, mitochondrial 1B precursor [Homo sapiens]	0.000946403	10.1436	47007.3	10334859	2 (2 0 0 0 0)
alpha SNAP [Homo sapiens]	3.91729e-05	10.1382	33225.3	3929617	1 (1 0 0 0 0)
N-Acetylglucosamine kinase [Homo sapiens]	0.00624087	10.1367	37392	6491737	2 (2 0 0 0 0)
AF102846_1 N-ethylmaleimide-sensitive factor [Homo sapiens]	0.000962705	10.1332	82600.2	10257494	1 (1 0 0 0 0)
AF142498_1 14-3-3 gamma protein [Homo sapiens]	0.00267507	10.1255	28356.8	5726310	2 (0 1 0 0 1)
gag protein [Human immunodeficiency virus 1]	0.00273222	10.1227	55119.2	90812182	4 (2 2 0 0 0)
hCG2031213, isoform CRA_a [Homo sapiens]	0.00942577	10.1201	45605.8	119569224	1 (1 0 0 0 0)
SUCA_HUMAN Succinyl-CoA ligase [GDP-forming] subunit alpha, mitochondrial pre	2.40023e-06	10.1195	35025.2	20141765	1 (1 0 0 0 0)
heterogeneous nuclear ribonucleoprotein A3 [Homo sapiens]	1.31265e-06	10.1194	39570.5	34740329	1 (1 0 0 0 0)
immunoglobulin heavy chain VHDJ region [Homo sapiens]	0.00293022	10.1193	12921.4	21670389	1 (1 0 0 0 0)
CD9 antigen [Homo sapiens]	0.000637009	10.1162	25399	4502693	2 (2 0 0 0 0)
tyrosine 3/tryptophan 5 -monooxygenase activation protein, theta polype	1.99609e-05	10.1157	27746.8	5803227	2 (2 0 0 0 0)
Chain , Human Complement Regulatory Protein Cd59 (Extracellular Region, Resid	0.000850498	10.1138	8080.61	515118	3 (3 0 0 0 0)
vpu protein [Human immunodeficiency virus type 1]	0.0017103	10.1137	10072.4	11321004	30 (5 13 7 3 2)
A Chain A, Crystal Structure Of Dictyostelium Discoideum Actin Complexed With	0.000106926	10.1122	41574.7	28374049	1 (1 0 0 0 0)
envelope glycoprotein [Human immunodeficiency virus type 1]	0.000789334	10.1113	97498.8	2290045	1 (1 0 0 0 0)
guanine nucleotide binding protein, alpha activating polypeptide O [Ho	0.00068677	10.1109	40024.9	10567816	2 (2 0 0 0 0)
GDAP1_HUMAN Ganglioside-induced differentiation-associated protein 1 (GDAP1)	7.77559e-05	10.1104	41225.8	38257679	1 (1 0 0 0 0)
CD3E antigen, epsilon polypeptide (TiT3 complex) [Homo sapiens]	0.000532007	10.1102	23132.5	4502671	1 (1 0 0 0 0)
THUMP domain containing 3 [Homo sapiens]	0.000174138	10.109	56938.9	14149690	1 (1 0 0 0 0)
vesicle-associated membrane protein 2 (synaptobrevin 2) [Homo sapiens]	8.12877e-05	10.1075	12640.7	7657675	1 (1 0 0 0 0)
A42177 KRAB-domain-containing zinc finger protein ZNF45 - human (fragment)	0.00127227	10.1036	46301.6	284284	3 (2 1 0 0 0)
gag protein [Human immunodeficiency virus 1]	0.00544184	10.102	12082.4	73913213	1 (1 0 0 0 0)
C Chain C, Crystal Structure Of Fibrinogen Fragment D	0.000155879	10.1019	36157.4	2781209	1 (1 0 0 0 0)
MTMR6_HUMAN Myotubularin-related protein 6	0.00165812	10.1009	71908.2	33112672	1 (1 0 0 0 0)
synaptotagmin I [Homo sapiens]	0.00240611	10.0995	47542.8	5032139	1 (1 0 0 0 0)
RUN and FYVE domain containing 3 isoform 1 [Homo sapiens]	0.00801664	10.0976	70564.8	82697315	2 (0 1 0 0 1)
AF166243_1 polyprotein [Human coxsackievirus A9]	0.000260939	10.0968	14608	6752609	3 (1 0 1 1 0)
DEAH (Asp-Glu-Ala-His) box polypeptide 40, isoform CRA_e [Homo sapiens]	0.00752014	10.0952	50220	119614812	2 (1 0 0 1 0)
peroxisome proliferator-activated receptor gamma, coactivator 1 beta [	0.00130636	10.0945	113124	31543392	1 (1 0 0 0 0)
SH3KBP1 binding protein 1 [Homo sapiens]	0.00214291	10.0938	76281	19923917	2 (2 0 0 0 0)
jerky homolog-like [Homo sapiens]	0.00472242	10.0937	59874.1	22547224	1 (1 0 0 0 0)
envelope glycoprotein [Human immunodeficiency virus type 1]	0.00461623	10.0931	97096	1079597	1 (1 0 0 0 0)
phosphatidylinositol-4-phosphate 5-kinase type II beta [Homo sapiens]	8.87814e-05	10.0918	47347.8	4505819	1 (1 0 0 0 0)
myelin oligodendrocyte glycoprotein [Homo sapiens] [M	0.000678865	10.0914	28175	793839	1 (1 0 0 0 0)
unnamed protein product [Homo sapiens]	0.0010936	10.0905	27528.8	10436240	3 (3 0 0 0 0)
DMRT-like family B with proline-rich C-terminal, 1, isoform CRA_a [Homo	0.00792206	10.0904	25050.3	119627140	1 (1 0 0 0 0)
gp120 [Human immunodeficiency virus type 1]	0.00408798	10.0886	24460.3	4071152	4 (2 0 1 1 0)
KIAA0570 protein [Homo sapiens]	0.00864929	10.088	388908	20521085	3 (1 0 1 1 0)
2,4-dienoyl CoA reductase 1 precursor [Homo sapiens]	0.00188358	10.088	36044.8	4503301	1 (1 0 0 0 0)
mitochondrial glutamate carrier 1 [Homo sapiens]	4.02568e-08	10.0877	34448.3	13375983	3 (3 0 0 0 0)
guanylate binding protein 1, interferon-inducible, 67kDa, isoform CRA_b	0.00377662	10.0873	32940	119593555	1 (1 0 0 0 0)
bromodomain and WD repeat domain containing 2 [Homo sapiens]	0.0022325	10.0868	136598	13324688	3 (3 0 0 0 0)
unnamed protein product [Homo sapiens]	0.00187061	10.0867	20379.3	28375487	3 (3 0 0 0 0)
envelope glycoprotein [Human immunodeficiency virus 1]	0.000255788	10.0853	96444.3	30314763	7 (1 1 3 2 0)
hCG2040698 [Homo sapiens]	0.00711705	10.085	9201.5	119599751	1 (1 0 0 0 0)
coronin, actin binding protein, 1A [Homo sapiens]	0.000345818	10.0845	50993.9	5902134	1 (1 0 0 0 0)
protease [Human immunodeficiency virus 1]	0.00960891	10.0842	10087.5	71391911	1 (1 0 0 0 0)
synaptosomal-associated protein 25 [Mus musculus]	5.44764e-05	10.0841	23300.2	6755588	2 (2 0 0 0 0)
VL1_HPV65 Major capsid protein L1	0.00537399	10.0833	58612.2	586244	1 (1 0 0 0 0)
early endosome antigen 1, 162kD, isoform CRA_b [Homo sapiens]	0.0033588	10.0825	107374	119617878	1 (1 0 0 0 0)
tubulin, beta [Mus musculus]	0.00983407	10.0815	49921	21746161	1 (1 0 0 0 0)
AF144813_1 gag protein [Human immunodeficiency virus type 1]	0.00287784	10.0814	11221.9	7767259	1 (1 0 0 0 0)
envelope protein [Human immunodeficiency virus 1] [M	0.00126409	10.0811	18667	623988	1 (1 0 0 0 0)
LAMA2_HUMAN Laminin subunit alpha-2 precursor (Laminin M chain) (Merosin heavy	0.00871199	10.0805	342549	2506805	4 (0 0 0 1 3)
oxygen regulated protein precursor [Homo sapiens]	0.00389188	10.0804	111266	5453832	2 (0 1 0 0 1)
reverse transcriptase [Human immunodeficiency virus 1]	0.00702264	10.0803	24911	125746732	2 (1 0 1 0 0)
reverse transcriptase [Human immunodeficiency virus 1]	0.00811152	10.0798	37358.7	18075077	3 (1 1 1 0 0)
envelope glycoprotein [Human immunodeficiency virus 1]	0.00493641	10.0795	13365.1	56125862	1 (1 0 0 0 0)
NG5 protein [Homo sapiens]	0.00105048	10.0786	31410	77681565	1 (1 0 0 0 0)
LRP16 protein [Homo sapiens]	0.00032365	10.0785	35482.7	13569840	4 (1 1 1 0 1)
protoporphyrinogen oxidase [Homo sapiens]	0.00511535	10.0785	50733.7	4506001	3 (0 1 0 1 1)
putative protein product of HMFT1638 [Homo sapiens]	0.00218825	10.0779	22888.5	51555781	1 (1 0 0 0 0)
solute carrier family 17, member 7 [Homo sapiens]	0.000455662	10.0771	61573.3	9945322	1 (1 0 0 0 0)
envelope glycoprotein [Human immunodeficiency virus 1]	0.00241276	10.0769	12595.6	50592176	1 (1 0 0 0 0)
LAMC1_HUMAN Laminin subunit gamma-1 precursor (Laminin B2 chain)	0.00562709	10.0767	177492	126369	1 (1 0 0 0 0)
DDX20_HUMAN Probable ATP-dependent RNA helicase DDX20 (DEAD box protein 20) (	0.000563855	10.0763	92182.4	12643886	1 (1 0 0 0 0)
A30802 Ca2+-transporting ATPase (EC 3.6.3.8) 2, plasma membrane - human	0.000293521	10.076	134625	86988	1 (1 0 0 0 0)
NADH dehydrogenase (ubiquinone) Fe-S protein 6, 13kDa (NADH-coenzyme Q	8.05387e-05	10.0754	13702.8	4758792	1 (1 0 0 0 0)
envelope glycoprotein V3 [Human immunodeficiency virus 1]	0.00970175	10.0754	14079.4	23304788	1 (1 0 0 0 0)
I38080 replication licensing factor MCM5 - human	0.00886068	10.0752	82192.3	2135871	1 (1 0 0 0 0)
AF344773_1 vpu protein [Human immunodeficiency virus type 1]	0.00100748	10.0747	9297.12	13487595	1 (1 0 0 0 0)
hypothetical protein [Homo sapiens]	0.00911571	10.0745	88919.7	30268314	1 (1 0 0 0 0)
immunoglobulin heavy chain VHDJ region [Homo sapiens]	0.000249077	10.0725	12941.5	21670711	1 (1 0 0 0 0)
KIF6 protein [Homo sapiens]	0.00612229	10.072	30063.2	18314519	1 (1 0 0 0 0)
gag protein [Human immunodeficiency virus 1]	0.00397334	10.0717	37879.9	46946961	1 (1 0 0 0 0)
immunoglobulin lambda light chain [Homo sapiens] [MA	0.00382696	10.0712	10643.3	4566097	2 (2 0 0 0 0)
hypothetical protein LOC51233, isoform CRA_b [Homo sapiens]	0.00967937	10.0711	18838.7	119579990	1 (1 0 0 0 0)
protease [Human immunodeficiency virus 1]	0.0058889	10.0707	10317.7	71391939	2 (1 0 1 0 0)
ubiquitin specific peptidase 38 [Homo sapiens]	0.00411941	10.0705	116472	27545313	1 (1 0 0 0 0)
envelope glycoprotein [Human immunodeficiency virus 1]	0.0051955	10.0702	21089.5	114151288	1 (1 0 0 0 0)
vpu protein [Human immunodeficiency virus 1]	0.00182033	10.0687	9954.32	90812198	1 (1 0 0 0 0)
gag protein [Human immunodeficiency virus 1]	0.00934336	10.0682	14594.4	80974922	1 (1 0 0 0 0)
AF075702_7 envelope glycoprotein [Human immunodeficiency virus type 1] [MA	0.00422578	10.0677	96188.5	5305484	1 (1 0 0 0 0)
pol polyprotein [Human immunodeficiency virus type 1]	0.00834631	10.0672	45818.5	13739590	2 (1 1 0 0 0)
likely ortholog of H. sapiens CUE domain containing 1 (CUEDC1) [Mus mus	0.00125307	10.0671	42753	56205535	2 (2 0 0 0 0)
JE0288 krueppel-type zinc finger protein - human	0.000516397	10.0671	77481.1	7447221	3 (0 1 1 0 1)
uromodulin-like 1 protein variant 9 [Homo sapiens]	0.00767376	10.0667	8253.19	48762472	1 (1 0 0 0 0)
reticulon 1 isoform A [Homo sapiens]	0.00208629	10.0663	83566.2	10863935	1 (1 0 0 0 0)
immunoglobulin heavy chain variable region [Homo sapiens]	0.00661878	10.066	13381.6	113472268	1 (1 0 0 0 0)
nef [Human immunodeficiency virus type 1]	0.00733424	10.066	23314.5	5070577	2 (0 0 1 1 0)
AF286555_1 envelope glycoprotein V3 region [Human immunodeficiency virus t	0.00566592	10.0653	13031	9885705	1 (1 0 0 0 0)
kinesin light chain 1K [Homo sapiens]	0.000580619	10.0652	19325.8	30409768	1 (1 0 0 0 0)
hypothetical protein [Homo sapiens]	0.00305355	10.0652	31255	21739162	1 (1 0 0 0 0)
envelope glycoprotein gp120 [Human immunodeficiency virus 1]	0.00148934	10.0651	23790.6	85662998	1 (1 0 0 0 0)
envelope glycoprotein [Human immunodeficiency virus type 1]	0.00187846	10.0649	29890.2	4679939	1 (1 0 0 0 0)
vpr protein [Human immunodeficiency virus 1]	0.000572597	10.0634	11214.7	77167711	1 (1 0 0 0 0)
FLJ00067 protein [Homo sapiens]	0.000101686	10.0632	63294.7	10440462	2 (1 0 1 0 0)
envelope glycoprotein [Human immunodeficiency virus type 1]	0.00195928	10.0631	27894.8	1845945	1 (1 0 0 0 0)
KRHU2 keratin 1, type II, cytoskeletal - human	0.00757978	10.0626	65454.4	7428712	2 (1 1 0 0 0)
hCG1813638 [Homo sapiens]	0.00268073	10.0625	8690.75	119599427	1 (1 0 0 0 0)
meningioma 1 [Homo sapiens]	0.00887357	10.0624	135918	55956910	1 (1 0 0 0 0)
serine/threonine protein kinase 11 [Homo sapiens]	0.00917198	10.0611	48604.8	4507271	1 (1 0 0 0 0)
nef protein [Human immunodeficiency virus 1]	0.00749109	10.06	23346.5	55560414	1 (1 0 0 0 0)
S100 calcium binding protein A13, isoform CRA_b [Homo sapiens]	0.00345505	10.0591	13196.5	119573683	1 (1 0 0 0 0)
KIAA1429 protein [Homo sapiens]	0.000436336	10.0589	200727	7243239	2 (0 0 1 1 0)
hCG2005342 [Homo sapiens]	0.0023652	10.0587	17561	119571856	1 (1 0 0 0 0)
minor histocompatibility antigen HA-1 [Homo sapiens]	0.00455515	10.0586	124536	47834348	1 (1 0 0 0 0)
alpha (1,2) fucosyltransferase [Homo sapiens]	0.000167516	10.0586	37749.3	1694699	2 (0 1 0 0 1)
hypothetical protein [Homo sapiens]	0.00747037	10.0581	55597.3	4884132	1 (1 0 0 0 0)
envelope glycoprotein [Human immunodeficiency virus 1]	0.0045818	10.0581	23791	24459646	1 (1 0 0 0 0)
B42856 ubiquitin carrier protein E2 - human	0.00216763	10.057	26447	345829	1 (1 0 0 0 0)
CUTL1_HUMAN Homeobox protein cut-like 1 (CCAAT displacement protein) (CDP) [M	0.00860261	10.057	164172	76803552	2 (0 1 0 0 1)
protease [Human immunodeficiency virus 1]	0.00632145	10.0561	10768.9	125745875	1 (1 0 0 0 0)
unnamed protein product [Homo sapiens]	0.00753265	10.0559	44033.2	10438319	1 (1 0 0 0 0)
envelope glycoprotein [Human immunodeficiency virus 1]	0.00252774	10.0558	38978.2	13559438	2 (0 1 0 0 1)
NS1 [Human bocavirus]	0.00889057	10.0557	72034.2	77125237	1 (1 0 0 0 0)
U06698 neuronal kinesin heavy chain from Homo sa	0.00564791	10.0557	100340	5263326	1 (1 0 0 0 0)
immunoglobulin heavy chain variable region [Homo sapiens]	0.00365537	10.0554	13089.4	111918173	1 (1 0 0 0 0)
antigen NY-CO-3 [Homo sapiens]	0.00365312	10.0545	21501.1	3170176	1 (1 0 0 0 0)
envelope glycoprotein [Human immunodeficiency virus 1]	0.00266351	10.0542	12399.7	87246784	1 (1 0 0 0 0)
zinc finger protein 673 [Homo sapiens]	0.00535608	10.0541	19460.7	8923322	1 (1 0 0 0 0)
tyrosylprotein sulfotransferase 1 [Homo sapiens]	0.00225804	10.0541	42161	4507665	1 (1 0 0 0 0)
vitelliform macular dystrophy 2-like 3 isoform 1 [Homo sapiens]	0.00719235	10.0532	76058.3	115527104	1 (1 0 0 0 0)
TBP-associated factor 13 [Homo sapiens]	0.00982253	10.0532	14278	5032155	1 (1 0 0 0 0)
DNA-dependent protein kinase catalytic subunit [Homo sapiens]	0.00876402	10.0526	9113.63	18143319	1 (1 0 0 0 0)
tetratricopeptide repeat domain 18 [Homo sapiens]	0.00769715	10.0526	125609	40255087	3 (2 1 0 0 0)
KIAA0820 protein [Homo sapiens]	0.0089751	10.052	99887.1	20521666	1 (1 0 0 0 0)
TAT_HV1B9 Protein Tat (Transactivating regulatory protein)	0.00384145	10.0514	11396.7	75593170	2 (1 1 0 0 0)
hCG1987492 [Homo sapiens]	0.00272409	10.0512	11162.6	119620735	1 (1 0 0 0 0)
hypothetical protein LOC388284 [Homo sapiens]	0.00513771	10.0509	33490.3	125628665	1 (1 0 0 0 0)
modulator of apoptosis 1 [Homo sapiens]	0.00140841	10.0502	39487.7	19923584	1 (1 0 0 0 0)
X-ray repair cross complementing protein 3 [Homo sapiens]	0.00536276	10.0501	37826.1	4885659	1 (1 0 0 0 0)
oxidoreductase NAD-binding domain containing 1 [Homo sapiens]	0.00941491	10.0498	34832.2	19923907	1 (1 0 0 0 0)
anti-tetanus toxoid immunoglobulin heavy chain variable region [Homo sap	0.000796504	10.0494	13179.5	58221951	1 (1 0 0 0 0)
syntaxin 1B2 [Rattus norvegicus]	0.00663945	10.0493	33223.8	6981600	1 (1 0 0 0 0)
VRK3 protein [Homo sapiens]	0.00333979	10.0493	45875	23272127	1 (1 0 0 0 0)
TNKS1_HUMAN Tankyrase-1 (TANK1) (Tankyrase I) (TNKS-1) (TRF1-interacting anky	0.00789246	10.0492	141922	20140451	1 (1 0 0 0 0)
K1045_HUMAN Protein KIAA1045	0.00652778	10.049	45163.4	73621116	1 (1 0 0 0 0)
hypothetical protein [Homo sapiens]	0.000292597	10.0461	96720.8	6808198	2 (0 0 1 1 0)
formiminotransferase cyclodeaminase [Homo sapiens]	0.00509439	10.0458	58889.5	11140815	1 (1 0 0 0 0)
polyprotein [Human rhinovirus 47]	0.00447003	10.0453	51978.1	38490016	1 (1 0 0 0 0)
hypothetical protein LOC79736 [Homo sapiens]	0.0062331	10.0445	41649.7	134053959	1 (1 0 0 0 0)
hematopoietic signal peptide-containing isoform 2 [Homo sapiens]	0.00125753	10.0412	27329.8	45580696	1 (1 0 0 0 0)
envelope glycoprotein [Human immunodeficiency virus 1]	0.00831086	10.0403	11956.5	22135336	1 (1 0 0 0 0)
leukemia-associated protein 2 [Homo sapiens]	0.00631561	10.0377	838.448	19716178	1 (1 0 0 0 0)
KIAA0431 [Homo sapiens]	0.00508632	10.0364	78264	40788259	1 (1 0 0 0 0)
coiled-coil domain containing 42 [Homo sapiens]	0.00730679	10.0256	38010.9	21389579	1 (1 0 0 0 0)
Tubulin, beta [Homo sapiens]	0.000881232	8.16796	49640	18088719	2 (1 1 0 0 0)
actin-like protein [Homo sapiens]	3.41748e-05	8.15065	11548	62420916	2 (0 1 1 0 0)
unnamed protein product [Homo sapiens]	0.000449823	8.13167	59594.1	22760140	1 (0 1 0 0 0)
Na,K-ATPase catalytic subunit alpha-A protein [Homo sapiens]	0.000198272	8.12968	3563.7	5919228	2 (0 2 0 0 0)
F-box and WD repeat domain containing 11 isoform A [Homo sapiens]	0.00249504	8.12041	58385.6	48928048	1 (0 1 0 0 0)
S34775 nicotinic acetylcholine receptor epsilon chain precursor - human	0.00478581	8.12007	54581.4	479584	2 (0 2 0 0 0)
S31503 H+/K+-exchanging ATPase (EC 3.6.3.10) ATP1AL1 - human (fragment)	0.0018655	8.11982	10485.2	346261	2 (1 1 0 0 0)
ORF putative E6 [Human papillomavirus type 59]	0.00778492	8.11758	19029.7	557237	1 (0 1 0 0 0)
pol polyprotein [Human immunodeficiency virus type 1]	0.00581905	8.11291	45351.3	13739666	1 (0 1 0 0 0)
Unknown [Homo sapiens]	0.00116231	8.10802	37662.5	4406607	4 (1 2 1 0 0)
coiled-coil domain containing 25 [Homo sapiens]	0.00356696	8.10671	24463.1	108936950	5 (0 4 1 0 0)
solute carrier family 10 (sodium/bile acid cotransporter family), memb	0.00151284	8.10389	46473.1	24308414	2 (0 0 1 0 1)
DNA packaging tegument protein UL25 [Human herpesvirus 3]	0.000367359	8.10137	65144.2	9625909	2 (0 0 1 0 1)
nuclear protein in testis, isoform CRA_b [Homo sapiens]	0.00431559	8.09404	124146	119612711	1 (0 1 0 0 0)
NEDD4_HUMAN E3 ubiquitin-protein ligase NEDD4	0.00371952	8.09003	114865	32172435	2 (0 2 0 0 0)
unnamed protein product [Homo sapiens]	0.00144805	8.08798	45280.1	47076905	1 (0 1 0 0 0)
AF258985_1 envelope glycoprotein [Human immunodeficiency virus type 1] [M	0.00213497	8.08798	12675.6	10952674	1 (0 1 0 0 0)
immunoglobulin E heavy chain variable region [Homo sapiens]	0.00399407	8.08282	13365.4	37014267	2 (0 1 0 0 1)
AF447582_1 HLCDGP1 [Homo sapiens]	0.00691067	8.08079	19942.3	18139947	1 (0 1 0 0 0)
tartrate resistant acid phosphatase 5 precursor [Homo sapiens]	0.00127267	8.07778	36575.7	4501873	2 (0 2 0 0 0)
envelope glycoprotein [Human immunodeficiency virus 1]	0.00843697	8.07677	10271.4	37695036	1 (0 1 0 0 0)
immunoglobulin heavy chain variable region [Homo sapiens]	0.00272613	8.07641	11441.5	71273902	1 (0 1 0 0 0)
immunoglobulin heavy chain variable region [Homo sapiens]	0.0052928	8.07638	13194.3	21327849	1 (0 1 0 0 0)
anaplastic lymphoma kinase (Ki-1), isoform CRA_c [Homo sapiens]	0.00326076	8.07629	63786.3	119620913	1 (0 1 0 0 0)
envelope glycoprotein [Human immunodeficiency virus type 1]	0.00436544	8.07543	32956.9	6739693	1 (0 1 0 0 0)
unnamed protein product [Homo sapiens]	0.00298039	8.07488	27396.5	34531946	1 (0 1 0 0 0)
envelope glycoprotein [Human immunodeficiency virus 1]	0.00310643	8.07453	15828.8	29647780	1 (0 1 0 0 0)
hCG201417 [Homo sapiens]	0.00325713	8.07402	23658.7	119594542	1 (0 1 0 0 0)
phosphotyrosyl phosphatase activator [Homo sapiens]	0.000283303	8.0729	36765.8	509243	1 (0 1 0 0 0)
immunoglobulin heavy chain variable region [Homo sapiens]	0.00201553	8.07259	13056.5	5419751	2 (0 0 1 0 1)
ATP synthase, H+ transporting, mitochondrial F0 complex, subunit d isof	0.00198397	8.07247	18479.5	5453559	1 (0 1 0 0 0)
pol protein [Human immunodeficiency virus 1]	0.00877616	8.07216	49278.2	60265123	1 (0 1 0 0 0)
envelope glycoprotein [Human immunodeficiency virus type 1]	0.000530587	8.07159	32663.1	10719731	1 (0 1 0 0 0)
HESB like domain containing 1 [Homo sapiens]	0.00763435	8.07112	16413.1	34996487	1 (0 1 0 0 0)
protease [Human immunodeficiency virus 1]	0.0058889	8.07066	10166.5	71843396	2 (1 1 0 0 0)
functionless protein [Homo sapiens]	0.00922862	8.07044	11288.3	38256947	1 (0 1 0 0 0)
zinc finger, DHHC-type containing 11 [Homo sapiens]	0.00493841	8.07018	45945.4	13376150	1 (0 1 0 0 0)
glioma pathogenesis-related protein precursor [Homo sapiens]	0.00350355	8.06712	30346.1	110825980	2 (1 1 0 0 0)
AF067164_1 zinc finger protein 2 [Homo sapiens]	0.000345241	8.06699	72326.3	4894362	2 (0 0 0 2 0)
TRI25_HUMAN Tripartite motif-containing protein 25 (Zinc finger protein 147)	0.00692907	8.06624	70943.9	12585547	3 (0 2 0 0 1)
antibody, light chain variable regin to HIV1 gp41 [Homo sapiens]	0.00836846	8.065	12309.2	732740	1 (0 1 0 0 0)
FLJ00345 protein [Homo sapiens]	0.00598016	8.06484	36797.6	21748544	1 (0 1 0 0 0)
gag protein [Human immunodeficiency virus 1]	0.00367301	8.06375	15919	47079033	2 (0 0 1 0 1)
keratin [Homo sapiens]	0.00757978	8.06261	51303.3	1200072	2 (1 1 0 0 0)
envelope glycoprotein [Human immunodeficiency virus type 1]	0.00729734	8.06258	10273.5	2641445	1 (0 1 0 0 0)
zinc finger protein 519 [Homo sapiens]	0.000849262	8.06013	62981.1	21686997	1 (0 1 0 0 0)
fatty acid binding protein 5 (psoriasis-associated) [Homo sapiens]	0.00652816	8.05936	15154.5	4557581	4 (0 3 1 0 0)
hypothetical protein (similar to Human CGI-32 protein [Streptococcus p	0.00457932	8.05856	22683.7	15674545	1 (0 1 0 0 0)
nef protein [Human immunodeficiency virus type 1] [M	0.000706538	8.05687	23553.8	4868235	1 (0 1 0 0 0)
envelope glycoprotein [Human immunodeficiency virus 1]	0.00377518	8.05578	95660.2	86753469	1 (0 1 0 0 0)
hCG1790787, isoform CRA_b [Homo sapiens]	0.00175788	8.05538	21869.2	119631971	1 (0 1 0 0 0)
protease [Human immunodeficiency virus 1]	0.000112858	8.05491	10405.6	33391641	1 (0 1 0 0 0)
vpu [Human immunodeficiency virus 1]	0.000229422	8.05392	10226.2	3287167	1 (0 1 0 0 0)
leucine-rich repeat LGI family, member 4 [Homo sapiens]	0.00754792	8.05359	59103.7	21281673	1 (0 1 0 0 0)
rhophilin, Rho GTPase binding protein 1, isoform CRA_e [Homo sapiens] [	0.00679679	8.05325	43550.8	119602661	1 (0 1 0 0 0)
envelope glycoprotein [Human immunodeficiency virus type 1]	0.00272047	8.05213	13266.9	1763509	1 (0 1 0 0 0)
unnamed protein product [Homo sapiens]	0.00350487	8.05209	148810	34534922	2 (0 1 0 1 0)
sarco/endoplasmic reticulum Ca2+ -ATPase [Homo sapiens]	7.1352e-05	8.0517	112442	3021396	1 (0 1 0 0 0)
LEU2_HUMAN Leukemia-associated protein 2 (Deleted in lymphocytic leukemia 2)	0.00926762	8.05142	10189.2	8928175	1 (0 1 0 0 0)
progesterone receptor membrane component 1 [Homo sapiens]	0.00099027	8.05119	21657.8	5729875	1 (0 1 0 0 0)
immunoglobuliln heavy chain variable region [Homo sapiens]	0.00247828	8.05092	10988.5	61608480	1 (0 1 0 0 0)
C8ORFK32 protein [Homo sapiens]	0.00198177	8.05069	144464	71296807	1 (0 1 0 0 0)
unknown [Homo sapiens]	0.00670382	8.05048	27558.5	62988643	1 (0 1 0 0 0)
fusion protein [Human parainfluenza virus 3]	0.00403074	8.05042	59982.6	222239	2 (0 0 1 0 1)
retinal outer segment membrane protein 1 [Homo sapiens]	0.003332	8.0498	37195.4	4506575	1 (0 1 0 0 0)
immunoglobulin kappa light chain variable region [Homo sapiens]	0.00184967	8.0489	12424.1	47271300	1 (0 1 0 0 0)
hCG2038572 [Homo sapiens]	0.00756129	8.0486	16853.9	119600142	1 (0 1 0 0 0)
sialic acid binding Ig-like lectin 7 isoform 1 [Homo sapiens]	3.77775e-05	8.04792	51110.5	7657570	1 (0 1 0 0 0)
unknown [Homo sapiens]	0.000193141	8.0479	22434.6	2852648	1 (0 1 0 0 0)
putative TCPTP-interacting protein [Homo sapiens]	0.00518527	8.04723	44043.9	14270766	1 (0 1 0 0 0)
hypothetical protein [Homo sapiens]	0.00744279	8.04465	53013.4	34365377	1 (0 1 0 0 0)
nef protein [Human immunodeficiency virus 1]	0.0079663	8.04391	23437.3	109894046	1 (0 1 0 0 0)
gag protein [Human immunodeficiency virus 1]	0.00347758	8.04114	16242.6	47079055	1 (0 1 0 0 0)
GCN5 general control of amino-acid synthesis 5-like 2 (yeast), isoform	0.00994926	8.04086	93964.7	119581206	1 (0 1 0 0 0)
CXorf30 [Homo sapiens]	0.00350406	8.0408	47581.8	149588556	1 (0 1 0 0 0)
tat protein [Human immunodeficiency virus 1]	0.007718	8.0401	11207.6	37682795	1 (0 1 0 0 0)
hypothetical protein [Homo sapiens]	0.00883368	8.03969	13813.6	12052814	1 (0 1 0 0 0)
envelope glycoprotein [Human immunodeficiency virus type 1]	0.00920992	8.0386	22601.2	14531913	1 (0 1 0 0 0)
unnamed protein product [Homo sapiens]	0.0085712	8.03499	22134.2	10438020	2 (0 0 0 2 0)
Homo sapiens zinc finger protein 202 [synthetic construct]	0.00386541	8.03437	51344.3	30585057	2 (0 2 0 0 0)
PDZ domain containing RING finger 3 [Homo sapiens]	0.00831377	6.1341	119521	57529737	4 (0 1 2 1 0)
AF289590_1 unknown [Homo sapiens]	0.00358721	6.11875	12612.6	18027384	3 (0 0 1 1 1)
C-type lectin domain family 3 member A [Homo sapiens]	0.00679702	6.10798	22218.5	148728186	6 (0 3 1 1 1)
envelope glycoprotein [Human immunodeficiency virus 1]	0.00794417	6.08574	96828.5	145306986	4 (1 0 0 2 1)
vif protein [Human immunodeficiency virus 1]	0.00368827	6.07985	22652.8	68521956	2 (0 1 1 0 0)
hypothetical protein LOC374977 [Homo sapiens]	0.001555	6.07935	145143	86990452	2 (0 0 0 1 1)
protease [Human immunodeficiency virus 1]	0.0058889	6.07066	10161.6	24021322	2 (0 1 1 0 0)
hCG1645235, isoform CRA_b [Homo sapiens]	0.00311416	6.06848	26510.1	119592769	3 (0 1 1 1 0)
unnamed protein product [Homo sapiens]	0.000823568	6.06308	62742.3	28193162	2 (1 0 1 0 0)
KDEL1_HUMAN KDEL motif-containing protein 1 precursor	0.00375309	6.06173	58005.6	74749382	2 (1 0 1 0 0)
gp120 [Human immunodeficiency virus 1]	0.00305747	4.15783	38115.2	28172510	9 (0 4 2 2 1)
AF156064_1 pol protein [Human immunodeficiency virus type 1]	0.00751612	4.07255	39535.9	6446512	3 (0 1 0 2 0)
reverse transcriptase [Human immunodeficiency virus 1]	0.00608751	4.07233	22563.8	67080330	3 (2 0 0 1 0)
KIAA1152 protein [Homo sapiens]	0.00709991	4.05477	40298.6	6330095	2 (0 0 0 0 2)
envelope glycoprotein gp120 [Human immunodeficiency virus 1]	0.00640087	4.04488	23294.8	85663125	2 (0 0 0 0 2)
pol protein [Human immunodeficiency virus 1]	0.00225871	2.13419	56979.6	42717134	7 (0 2 0 2 3)
hypothetical protein [Homo sapiens]	0.000268758	2.12688	96046.7	51476547	3 (1 0 1 0 1)
nef protein [Human immunodeficiency virus 1]	0.00204395	2.07988	14281.2	90192289	2 (0 1 0 0 1)
reverse transcriptase [Human immunodeficiency virus 1]	0.00811152	2.07122	24550.7	71844956	2 (0 1 0 0 1)

## Sheet: Control_3_UT
Description	P-value	Score	MW	Accession	Peptide (Hits)
2',3'-cyclic-nucleotide 3'-phosphodiesterase (EC 3.1.4.37)	3.74781e-08	254.229	45070.4	180687	63 (55 2 1 1 4)
I38369 beta-tubulin - human (fragment)	9.3493e-11	236.266	48848.5	2119276	117 (97 13 3 3 1)
brain creatine kinase [Homo sapiens]	5.98992e-10	218.264	42617.4	21536286	47 (39 1 5 2 0)
glial fibrillary acidic protein [Homo sapiens]	7.25468e-08	202.166	49849.7	4503979	31 (23 4 1 3 0)
neurofilament, light polypeptide 68kDa [Homo sapiens]	3.27837e-07	188.209	61479.3	105990539	23 (19 2 2 0 0)
tubulin alpha 6 [Homo sapiens]	3.86805e-10	182.243	49863.5	14389309	79 (70 5 4 0 0)
syntaxin binding protein 1 isoform a [Homo sapiens]	4.16197e-08	172.173	68692.3	4507297	25 (17 4 0 3 1)
tubulin, beta 4 [Homo sapiens]	4.38538e-13	156.308	49553.9	21361322	113 (84 18 7 2 2)
A40671 dynamin, internal form 1, long C-terminal form - human [M	8.73066e-12	118.276	97201	539580	17 (14 0 1 0 2)
voltage-dependent anion channel 1 [Homo sapiens]	7.75485e-07	108.194	30753.6	4507879	16 (15 1 0 0 0)
tubulin, beta, 4 [Homo sapiens]	5.83351e-10	104.254	50400.3	50592996	46 (23 18 1 2 2)
brain abundant, membrane attached signal protein 1 [Homo sapiens]	5.59774e-08	104.156	22680	30795231	16 (14 1 0 1 0)
N-ethylmaleimide-sensitive factor [Homo sapiens]	1.87739e-07	86.1727	82602.2	11079228	13 (8 2 3 0 0)
N Chain N, Mutant Monomer Of Recombinant Human Hexokinase Type I Complexed With	2.40812e-07	84.2073	102383	7245424	11 (9 1 1 0 0)
KIAA0968 protein [Homo sapiens]	6.46166e-08	84.1646	58985.2	4589580	16 (13 2 1 0 0)
ATP synthase, H+ transporting, mitochondrial F1 complex, alpha subunit	1.16403e-08	82.1877	59713.7	4757810	12 (11 0 0 0 1)
histone H2B [Homo sapiens]	0.000122047	78.086	13927.6	1568557	9 (8 1 0 0 0)
ATRB actin, skeletal muscle - rabbit	0.0013975	76.158	41789.8	71611	15 (9 3 1 2 0)
tubulin, alpha-like 3 [Homo sapiens]	3.73238e-05	76.1329	49876.8	13376181	27 (19 3 2 3 0)
ANK2_HUMAN Ankyrin-2 (Brain ankyrin) (Ankyrin-B) (Ankyrin, nonerythroid)	3.46049e-06	74.1603	430079	1703310	9 (5 2 1 0 1)
A Chain A, Crystal Structure Of A DictyosteliumTETRAHYMENA CHIMERA Actin (Mutan	1.06421e-07	70.183	41719.9	7245526	13 (10 0 2 1 0)
KIAA0417 [Homo sapiens]	9.27153e-07	70.1131	78381.4	2887409	9 (8 0 1 0 0)
neurofilament, medium polypeptide 150kDa [Homo sapiens]	7.90688e-07	68.1399	102386	4885513	9 (6 1 1 1 0)
tyrosine 3-monooxygenase/tryptophan 5-monooxygenase activation protein,	5.10777e-08	66.1752	28284.9	9507245	24 (18 3 2 1 0)
GNAO2_HUMAN Guanine nucleotide-binding protein G(o) subunit alpha 2	1.33889e-06	66.1431	40061.1	60416433	13 (9 1 0 1 2)
internexin neuronal intermediate filament protein, alpha [Homo sapiens	0.000582951	66.1063	55357.5	14249342	8 (6 2 0 0 0)
tubulin, alpha 1B [Mus musculus]	1.92597e-09	60.2389	50119.6	34740335	31 (31 0 0 0 0)
tubulin, beta 2 [Homo sapiens]	6.153e-10	58.1713	49875	4507729	28 (22 2 3 1 0)
myelin basic protein isoform 1 [Homo sapiens]	4.89954e-07	58.1508	21480	68509930	12 (11 1 0 0 0)
voltage-dependent anion channel 3 [Homo sapiens]	0.000668412	58.1231	30639.3	25188179	6 (5 1 0 0 0)
VDAC2 [Homo sapiens]	2.87706e-09	56.1982	30393	48146045	9 (7 1 1 0 0)
dihydropyrimidinase-like 2 [Homo sapiens]	3.67801e-07	56.1462	62254.7	4503377	10 (6 2 1 1 0)
calcium/calmodulin-dependent protein kinase IIB isoform 8 [Homo sapien	2.05611e-08	56.121	50923	26051218	10 (7 1 1 0 1)
tyrosine 3-monooxygenase/tryptophan 5-monooxygenase activation protein,	1.10468e-06	52.1271	28064.8	4507949	8 (6 1 0 1 0)
B46091 H+-exporting ATPase (EC 3.6.3.6) chain A, vacuolar (VA68 type) - human	4.64501e-08	52.118	68204.5	1082432	6 (5 0 0 0 1)
proteolipid protein [Rattus norvegicus]	3.17989e-06	50.1561	30057.1	13591880	16 (12 3 0 0 1)
unnamed protein product [Homo sapiens]	0.00525912	50.1435	110204	21754454	10 (3 3 2 2 0)
clathrin heavy chain 1 [Homo sapiens]	0.00133366	50.0912	191492	4758012	8 (2 1 2 2 1)
Na+/K+ -ATPase alpha 2 subunit proprotein [Homo sapiens]	1.4206e-09	48.2095	112194	4502271	8 (7 1 0 0 0)
ANK3_HUMAN Ankyrin-3 (ANK-3) (Ankyrin-G)	0.00917587	48.0879	480106	21759000	8 (3 1 2 1 1)
tyrosine 3/tryptophan 5 -monooxygenase activation protein, zeta polypep	5.92667e-09	46.1808	27727.7	4507953	11 (7 2 1 0 1)
phosphofructokinase, platelet [Homo sapiens]	7.44876e-10	44.2168	85541.6	11321601	5 (4 0 0 1 0)
unnamed protein product [Homo sapiens]	2.17141e-09	44.2112	49811	10433717	22 (9 4 4 3 2)
crystallin, alpha B [Homo sapiens]	3.47051e-07	44.1606	20146.4	4503057	7 (4 1 0 2 0)
microtubule-associated protein 1B isoform 1 [Homo sapiens]	8.95826e-06	44.1576	270452	5174525	7 (2 2 2 0 1)
vacuolar H+ATPase B2 [Homo sapiens]	1.44829e-07	40.1691	56465	19913428	4 (4 0 0 0 0)
heterogeneous nuclear ribonucleoprotein A2/B1 isoform A2 [Homo sapiens]	2.16164e-05	40.1461	35983.8	4504447	5 (4 0 1 0 0)
H4 histone family, member A [Homo sapiens]	1.84562e-05	40.1311	11360.4	4504301	10 (7 0 1 1 1)
KIAA0820 protein [Homo sapiens]	9.86178e-08	38.2104	99887.1	20521666	5 (3 2 0 0 0)
glyceraldehyde-3-phosphate dehydrogenase [Homo sapiens]	5.45044e-10	38.1777	36030.4	7669492	6 (5 1 0 0 0)
heat shock 90kDa protein 1, beta [Homo sapiens]	6.9388e-09	38.144	83212.2	20149594	4 (3 1 0 0 0)
contactin 1 isoform 1 precursor [Homo sapiens]	1.23247e-05	38.0675	113249	28373117	4 (3 1 0 0 0)
collapsin response mediator protein 1 isoform 2 [Homo sapiens]	0.000219824	36.131	62144.8	4503051	5 (3 0 0 1 1)
unnamed protein product [Homo sapiens]	3.51944e-05	34.2067	57919.5	28940	4 (2 1 1 0 0)
calcium/calmodulin-dependent protein kinase II gamma isoform 1 [Mus mu	1.28648e-05	34.1086	59569.4	75991700	5 (2 1 1 1 0)
STX1B_HUMAN Syntaxin-1B1 (Syntaxin 1B)	2.83482e-08	32.166	33410.1	2501085	4 (3 0 0 0 1)
KIAA0987 protein [Homo sapiens]	6.85053e-05	32.1337	123629	4589618	5 (4 0 0 0 1)
Na+/K+ -ATPase alpha 1 subunit isoform a proprotein [Homo sapiens]	9.95114e-05	30.1543	112824	21361181	4 (4 0 0 0 0)
guanine nucleotide-binding protein, beta-2 subunit [Mus musculus]	2.00421e-06	30.1291	37307.1	13937391	3 (3 0 0 0 0)
VPP1_HUMAN Vacuolar proton translocating ATPase 116 kDa subunit a isoform 1 (	0.000632086	30.1277	96350.3	59803038	5 (4 1 0 0 0)
tyrosine 3/tryptophan 5 -monooxygenase activation protein, epsilon poly	2.35695e-05	30.1046	29155.4	5803225	3 (3 0 0 0 0)
unknown [Homo sapiens]	0.000997223	30.0739	268547	62988842	6 (0 1 2 2 1)
ALMS1 protein [Homo sapiens]	0.000318728	30.0667	460906	20067381	4 (2 1 0 0 1)
adenylyl cyclase-associated protein 2 [Homo sapiens]	0.000382071	28.1514	52790.9	5453593	3 (2 1 0 0 0)
Chain , Aldolase A (E.C.4.1.2.13)	1.97242e-06	28.1053	39264.3	229674	3 (2 1 0 0 0)
ubiquinol-cytochrome c reductase core protein II [Homo sapiens]	0.000976353	28.0974	48412.9	50592988	3 (2 1 0 0 0)
Na+/K+ -ATPase beta 1 subunit isoform a [Homo sapiens]	0.000175671	28.0971	35038.9	4502277	4 (3 1 0 0 0)
vesicle-associated membrane protein 2 (synaptobrevin 2) [Homo sapiens]	8.14634e-06	28.0867	12640.7	7657675	3 (2 1 0 0 0)
KIAA0338 [Homo sapiens]	0.00224697	28.0687	103516	2224617	4 (2 1 1 0 0)
antigen of the monoclonal antibody Ki-67 [Homo sapiens]	0.00382396	28.0607	358524	415819	6 (2 1 0 2 1)
glyoxalase I [human, hepatoma Hep G2, Peptide Partial, 73 aa]	0.00230234	28.056	8091.83	410550	3 (2 1 0 0 0)
TBB4Q_HUMAN Tubulin beta-4q chain	3.11128e-09	26.1607	48403.5	12643363	6 (2 3 1 0 0)
Na+,K+ ATPase [Homo sapiens]	8.40533e-05	26.1501	111901	1359715	4 (2 0 1 0 1)
Thy-1 cell surface antigen [Homo sapiens]	0.000327652	26.1286	17923.3	19923362	5 (3 1 1 0 0)
tubulin, alpha 4 [Mus musculus]	2.92747e-06	26.1257	49892.4	6678467	5 (4 0 1 0 0)
B-cell CLL/lymphoma 9 [Homo sapiens]	0.00510778	26.0927	145876	2570024	3 (1 2 0 0 0)
synapsin I isoform Ia [Homo sapiens]	0.00167989	26.0707	74065.8	19924099	3 (2 0 1 0 0)
M-phase phosphoprotein 11 [Homo sapiens]	0.00674618	26.0512	67362.6	1770454	3 (1 2 0 0 0)
tubulin, beta, 2 [Homo sapiens]	2.61757e-08	24.211	49799	5174735	18 (5 6 7 0 0)
DPYL4_HUMAN Dihydropyrimidinase-related protein 4 (DRP-4) (Collapsin response	2.16912e-05	24.1349	61838.5	68067941	5 (1 2 0 1 1)
pyridoxal kinase [Homo sapiens]	5.59874e-05	24.1057	35079.9	4505701	6 (4 0 0 2 0)
CK041_HUMAN Putative membrane protein C11orf41	0.00399534	24.0665	131121	74712291	3 (2 0 0 1 0)
unnamed protein product [Homo sapiens]	0.00373232	24.061	101510	21758180	5 (2 2 1 0 0)
similar to GenBank Accession Number AF045184 nuclear receptor coactivato	0.000268033	22.198	25758.4	29841015	9 (0 5 1 2 1)
H1 histone family, member 0 [Homo sapiens]	5.27607e-05	22.1336	20850.2	4885371	3 (2 0 0 0 1)
R Chain R, Twinning In Crystals Of Human Skeletal Muscle D- Glyceraldehyde-3-Pho	1.16613e-06	22.1022	35853.3	230867	4 (2 0 2 0 0)
ubiquitin carboxyl-terminal esterase L1 (ubiquitin thiolesterase) [Hom	0.000416217	22.0853	24808.5	21361091	3 (2 0 0 0 1)
KIAA1172 protein [Homo sapiens]	0.00706694	22.0842	101952	6330211	5 (1 0 1 1 2)
KIAA0712 protein [Homo sapiens]	0.00361153	22.0742	194456	21698920	3 (0 2 1 0 0)
PHF2_HUMAN PHD finger protein 2 (GRC5)	0.00267514	22.0466	121157	34098387	3 (0 2 1 0 0)
histone H2A [Homo sapiens]	2.01744e-09	20.2867	13986.8	28195394	12 (11 0 0 0 1)
hypothetical protein ( (L11645) alpha-tubulin [Homo sapiens] ) [Neuros	5.54733e-08	20.2128	10326.7	85091443	2 (2 0 0 0 0)
S68466 translation elongation factor EF-Tu-like protein P43 precursor, mitochondria	1.73904e-07	20.1685	49502.2	7443384	3 (2 1 0 0 0)
Cytochrome c oxidase subunit Va [Homo sapiens]	0.000235193	20.162	16751.7	18999392	2 (2 0 0 0 0)
CD59 antigen p18-20 [Homo sapiens]	0.000845857	20.158	14167.8	10835165	2 (2 0 0 0 0)
isocitrate dehydrogenase (NADP+) [Homo sapiens]	2.73624e-05	20.1444	50915.9	872121	2 (2 0 0 0 0)
protein kinase C, gamma [Homo sapiens]	1.44911e-05	20.1377	78397.3	13384594	2 (2 0 0 0 0)
phosphoglycerate mutase 2 (muscle) [Homo sapiens] [	0.000170497	20.137	28201.4	51094513	3 (3 0 0 0 0)
S27954 leucine-rich protein - human	2.41515e-06	20.1309	137330	284289	3 (1 1 0 0 1)
WD repeat-containing protein 1 isoform 1 [Homo sapiens]	4.13785e-06	20.1215	66151.9	9257257	2 (2 0 0 0 0)
beta actin [Homo sapiens]	2.98921e-05	20.117	41709.7	4501885	3 (3 0 0 0 0)
KIAA1176 protein [Homo sapiens]	3.82843e-05	20.1153	121738	6330233	2 (2 0 0 0 0)
synaptosomal-associated protein 25 isoform SNAP25A [Homo sapiens]	4.85528e-05	20.1136	23321.2	18765733	2 (2 0 0 0 0)
HRIHFB2255 [Homo sapiens]	0.00616294	20.1059	33764.5	3970866	3 (1 0 1 1 0)
unnamed protein product [Homo sapiens]	3.24039e-05	20.1024	14846.6	37848	2 (2 0 0 0 0)
eukaryotic translation elongation factor 1 alpha 1 [Homo sapiens]	1.12122e-05	20.1014	50109.2	4503471	2 (2 0 0 0 0)
solute carrier family 25 (mitochondrial carrier; adenine nucleotide tr	0.000237824	20.1003	33043.2	55749577	2 (2 0 0 0 0)
microsomal glutathione S-transferase 3 [Homo sapiens]	8.80191e-06	20.0961	16505.6	4758714	4 (4 0 0 0 0)
similar to NM_031954 MSTP028 protein in Homo sapiens [Schistosoma japoni	0.00173495	20.089	38879.5	29840923	4 (0 1 1 1 1)
zinc finger, DHHC-type containing 11 [Homo sapiens]	0.00804036	20.086	45945.4	13376150	2 (2 0 0 0 0)
KIAA1113 protein [Homo sapiens]	0.00238963	20.084	122944	5689563	4 (1 1 1 0 1)
neural cell adhesion molecule 1 isoform 3 [Homo sapiens]	0.000665061	20.0743	83718	115529478	2 (2 0 0 0 0)
ZN525_HUMAN Zinc finger protein 525	4.35595e-05	20.0695	41686.1	74762535	2 (2 0 0 0 0)
LIM homeobox transcription factor 1, alpha isoform a [Homo sapiens]	0.00431734	20.068	42719.8	28893581	3 (1 0 1 1 0)
cytochrome P450, family 24 precursor [Homo sapiens]	0.00684454	20.0668	58837.6	55770850	2 (2 0 0 0 0)
histone cluster 1, H1d [Homo sapiens]	0.00547648	20.0584	22336.3	4885377	2 (2 0 0 0 0)
neuroblastoma-amplified protein [Homo sapiens] [M	0.00520518	20.0514	268398	41393547	4 (0 0 2 2 0)
unnamed protein product [Homo sapiens]	2.04892e-05	18.1156	35738.8	32486	3 (0 1 1 1 0)
excitatory amino acid transporter 2 [Homo sapiens]	7.48484e-06	18.1099	62063.9	40254478	2 (1 1 0 0 0)
novel protein similar to human MDN1, midasin homolog (yeast) (MDN1) [Da	0.00415611	18.1069	248056	56207742	2 (1 1 0 0 0)
calcium/calmodulin-dependent protein kinase II delta isoform 1 [Homo s	7.19799e-08	18.1005	54093.6	26667183	2 (1 1 0 0 0)
olfactory receptor, family 1, subfamily M, member 1 [Homo sapiens]	0.000666057	18.0986	34816.2	52218828	4 (2 2 0 0 0)
alveolar soft part sarcoma chromosome region, candidate 1 long isoform	0.00510252	18.0955	59759	30794438	2 (1 1 0 0 0)
bromodomain PHD finger transcription factor [Homo sapiens]	0.00342308	18.0953	311017	6683492	5 (0 1 1 2 1)
envelope glycoprotein [Human immunodeficiency virus 1]	0.00833162	18.0872	97148.7	87116039	2 (1 1 0 0 0)
polyprotein [Human rhinovirus 75]	0.00807715	18.0865	243196	95102536	3 (0 2 0 0 1)
FLJ25770 protein [Homo sapiens]	0.00564446	18.0762	25823.9	23271807	2 (1 1 0 0 0)
zinc fingers and homeoboxes 3 [Homo sapiens]	0.00752106	18.0733	104592	28827782	4 (1 2 0 0 1)
KIAA0241 protein [Homo sapiens]	0.00239834	18.0663	79440.5	51105855	2 (1 1 0 0 0)
ORF 1a [Human group 1 coronavirus associated with pneumonia]	0.000235231	18.0662	450580	46369872	5 (0 0 2 2 1)
hypothetical protein DDBDRAFT_0167764 [Dictyostelium discoideum AX4]	0.00865858	18.0646	126479	66821059	3 (1 0 0 2 0)
transformer-2 alpha [Homo sapiens]	0.0012766	18.0645	32669.1	9558733	3 (2 1 0 0 0)
polymerase (DNA directed) iota [Homo sapiens]	0.00797636	18.0541	80295.6	6005848	2 (1 1 0 0 0)
microtubule-associated protein, RP/EB family, member 2 [Homo sapiens]	5.97999e-11	16.2262	37008.2	10346135	2 (1 0 1 0 0)
B Chain B, Ligand-Free Heterodimeric Human Glutathione S-Transferase M2-3 (Ec 2	6.05773e-07	16.1785	26411.1	5822511	3 (1 1 1 0 0)
AP3B1_HUMAN AP-3 complex subunit beta-1 (Adapter-related protein complex 3 be	0.0062987	16.1371	121274	18201935	15 (3 2 3 7 0)
KIAA0842 protein [Homo sapiens]	4.74064e-05	16.1264	112780	4240173	4 (1 0 0 1 2)
neurolysin [Homo sapiens]	0.00824105	16.0953	80599.8	14149738	4 (1 1 0 1 1)
giantin [Homo sapiens]	0.00928258	16.088	375846	405715	3 (0 1 0 2 0)
novel protein similar to human and mouse intersectin 2 (ITSN2) [Danio r	0.00805879	16.0734	164326	56207805	3 (1 0 1 1 0)
spermatogenesis associated 11 [Homo sapiens]	0.00200169	16.0699	24500.7	14150066	2 (1 0 1 0 0)
novel similar to human Nance-Horan syndrome protein (RP11-262D11.5) [M	0.00419834	16.0664	20683.6	123229761	2 (1 0 1 0 0)
cyclin-dependent kinase 5, regulatory subunit 2 [Homo sapiens]	0.00530949	16.0639	38680.2	4502739	2 (0 2 0 0 0)
AP1B1_HUMAN AP-1 complex subunit beta-1 (Adapter-related protein complex 1 bet	0.00686561	16.0572	104540	1703167	2 (0 2 0 0 0)
1D-myo-inositol-trisphosphate 3-kinase A [Homo sapiens]	0.00520693	16.0552	50977.1	4504789	4 (0 0 1 2 1)
Rho guanine nucleotide exchange factor 3 [Homo sapiens]	0.00765938	16.055	59745.3	9506401	2 (1 0 1 0 0)
stearoyl-CoA desaturase [Homo sapiens]	0.00545697	16.0548	41496.2	53759151	4 (1 1 1 1 0)
hypothetical protein [Homo sapiens]	0.00326839	16.0514	45591	52546039	2 (0 2 0 0 0)
DCLK1_HUMAN Serine/threonine-protein kinase DCLK1 (Doublecortin-like and CAM k	0.00150372	16.0508	82173	6225242	2 (1 0 1 0 0)
tubulin, alpha 1a [Mus musculus]	1.08904e-07	14.199	49927.7	6678465	6 (5 0 0 1 0)
glutamate transporter [Homo sapiens]	1.44114e-05	14.1017	61664.6	488752	6 (3 1 0 2 0)
WNT9B_HUMAN Protein Wnt-9b precursor (Wnt-15) (Wnt-14b)	0.00886068	14.093	38945.3	20532421	5 (3 0 1 1 0)
EAA5_HUMAN Excitatory amino acid transporter 5 (Solute carrier family 1 member	0.000223434	14.0886	60683.2	3023686	2 (0 1 1 0 0)
SALL1_HUMAN Sal-like protein 1 (Zinc finger protein SALL1) (Spalt-like transc	0.00287747	14.0881	140303	20455270	2 (0 1 1 0 0)
clusterin isoform 2 [Homo sapiens]	0.000151308	14.0876	52461.1	42740907	2 (1 0 0 1 0)
kinesin family member 11 [Homo sapiens]	0.0099577	14.0841	119085	13699824	3 (1 0 0 2 0)
Bloom syndrome protein [Homo sapiens]	0.00712135	14.0736	158900	4557365	2 (0 1 1 0 0)
NADH dehydrogenase (ubiquinone) 1 alpha subcomplex, 8, 19kDa [Homo sapi	0.00753065	14.073	20092.1	7657369	2 (1 0 0 1 0)
similar to t-complex 1; T-complex locus TCP-1; t-complex 1 (a murine tcp	0.00294832	14.0711	19812.7	51094756	7 (2 1 4 0 0)
capsid protein [Human astrovirus 4]	0.00654927	14.0683	85024.3	7415530	2 (0 1 1 0 0)
histone H2A.2 [Homo sapiens]	0.00388629	14.0657	13898.5	31979	2 (1 0 0 1 0)
gelsolin isoform a precursor [Homo sapiens]	0.00961916	14.0653	85644.2	4504165	2 (1 0 0 1 0)
ZIS1 [Homo sapiens]	0.00262036	14.0646	38199.7	4191327	2 (0 1 1 0 0)
hCG1747788 [Homo sapiens]	0.00172344	12.1403	14554.8	119608911	11 (0 0 10 0 1)
hypothetical protein [Homo sapiens]	0.00261593	12.1045	96046.7	51476547	4 (1 1 0 2 0)
envelope glycoprotein [Human immunodeficiency virus type 1]	0.00121162	12.0985	97498.8	2290045	2 (1 0 0 0 1)
KIAA0368 [Homo sapiens]	0.00966633	12.0888	159375	2224677	3 (0 1 0 1 1)
AF184346_1 gag protein [Human immunodeficiency virus type 1]	0.00716616	12.0824	21526.9	6815528	2 (0 0 2 0 0)
MTMR6_HUMAN Myotubularin-related protein 6	0.0069677	12.0822	71908.2	33112672	2 (1 0 0 0 1)
LBP-1a=transcription factor binding to initiation site of HIV-1 {alternati	0.00103279	12.0811	56390.1	545524	2 (0 1 0 1 0)
fibrillarin [Homo sapiens]	0.00547824	12.0794	33763.4	12056465	2 (0 1 0 1 0)
43-kDa form skeletal muscle and kidney enriched inositol phosphatase [Ho	0.00164161	12.0687	42894.7	7209857	2 (1 0 0 0 1)
E1 protein [Human papillomavirus type 38b]	0.00151296	12.0677	69113.2	74484001	2 (1 0 0 0 1)
valosin-containing protein [Homo sapiens]	0.000244707	12.0664	89265.9	6005942	2 (1 0 0 0 1)
synaptojanin 2B [Homo sapiens]	0.00224472	12.0637	159854	4104822	2 (0 0 2 0 0)
unnamed protein product [Homo sapiens]	0.00131387	12.0614	27528.8	10436240	4 (1 1 1 1 0)
hCG1659994, isoform CRA_a [Homo sapiens]	0.00933956	12.061	5102.74	119620476	2 (0 1 0 1 0)
hypothetical protein LOC414265 [Homo sapiens]	0.00582727	12.061	29596.3	149588907	2 (0 1 0 1 0)
SRPK2_HUMAN Serine/threonine-protein kinase SRPK2 (Serine/arginine-rich prote	0.0046171	12.0545	77494.3	68566065	2 (0 1 0 1 0)
unknown [Homo sapiens]	0.0076585	12.0469	14562.1	62988972	2 (1 0 0 0 1)
3-oxoacid CoA transferase 1 precursor [Homo sapiens]	0.00348029	12.0462	56122	4557817	2 (1 0 0 0 1)
H2A histone family, member Z [Homo sapiens]	1.26135e-09	10.3003	13544.5	4504255	1 (1 0 0 0 0)
H2A histone family, member O [Homo sapiens]	4.52591e-08	10.2567	14086.9	4504251	5 (4 0 1 0 0)
creatine kinase, mitochondrial 1B precursor [Homo sapiens]	3.22512e-07	10.2328	47007.3	10334859	1 (1 0 0 0 0)
synaptosomal-associated protein, 25kDa [Homo sapiens]	3.82656e-09	10.2251	10676	24740601	1 (1 0 0 0 0)
vacuolar proton ATPase [Homo sapiens]	5.15213e-07	10.2062	26213.8	313014	1 (1 0 0 0 0)
ACACA protein [Homo sapiens]	0.000608437	10.1922	78222.1	32425437	1 (1 0 0 0 0)
H2A histone family, member A [Homo sapiens]	1.6769e-05	10.19	14127	10645195	3 (3 0 0 0 0)
Tubulin, beta [Homo sapiens]	0.00883468	10.1723	49640	18088719	2 (2 0 0 0 0)
syntaxin 1B2 [Rattus norvegicus]	2.25871e-06	10.161	33223.8	6981600	2 (2 0 0 0 0)
CD9 antigen [Homo sapiens]	1.19733e-05	10.1586	25399	4502693	1 (1 0 0 0 0)
envelope glycoprotein [Human immunodeficiency virus 1]	0.00841271	10.149	96094.3	90655989	2 (2 0 0 0 0)
prosaposin isoform a preproprotein [Homo sapiens]	0.000136587	10.1468	58073.9	11386147	1 (1 0 0 0 0)
alpha 2 globin [Homo sapiens]	2.45897e-09	10.1402	15247.9	4504345	1 (1 0 0 0 0)
ubiquinol-cytochrome c reductase binding protein [Homo sapiens]	3.04565e-07	10.1382	13522	5454152	1 (1 0 0 0 0)
VP-1 capsid protein [Human poliovirus 1]	0.00646356	10.1301	10539.1	12231217	2 (2 0 0 0 0)
nel homolog [Homo sapiens]	0.0015231	10.1289	48825.8	1515427	1 (1 0 0 0 0)
S31503 H+/K+-exchanging ATPase (EC 3.6.3.10) ATP1AL1 - human (fragment)	6.16982e-05	10.1198	10485.2	346261	2 (1 1 0 0 0)
A Chain A, Human Prion Protein	4.63203e-07	10.1182	22876.6	6730485	1 (1 0 0 0 0)
CTL5_HUMAN Choline transporter-like protein 5 (Solute carrier family 44 membe	0.00916243	10.1181	81640.2	73918937	5 (1 2 0 1 1)
cytochrome P450, family 4, subfamily F, polypeptide 12, isoform CRA_c [	0.00596513	10.1179	21680.4	119604900	3 (2 1 0 0 0)
unnamed protein product [Homo sapiens]	0.000347668	10.1146	39566.4	10435335	2 (2 0 0 0 0)
oxoglutarate dehydrogenase-like [Homo sapiens]	0.00369831	10.11	114407	8922716	1 (1 0 0 0 0)
fascin 1 [Homo sapiens]	4.27976e-07	10.1057	54496.1	4507115	1 (1 0 0 0 0)
glucose phosphate isomerase [Homo sapiens]	0.00161249	10.1044	63107.3	18201905	2 (2 0 0 0 0)
envelope glycoprotein [Human immunodeficiency virus type 1]	0.0067927	10.1018	97312.9	1079599	1 (1 0 0 0 0)
cofilin 1 (non-muscle) [Homo sapiens]	0.00210155	10.1015	18490.7	5031635	1 (1 0 0 0 0)
A Chain A, The 1.9-A Crystal Structure Of The Noncollagenous (Nc1) Domain Of H	1.34161e-05	10.1013	25314	21466080	1 (1 0 0 0 0)
Unknown (protein for MGC:54300) [Homo sapiens] [MAS	0.00673105	10.1012	13716	28839545	1 (1 0 0 0 0)
ADP-ribosylation factor 3 [Homo sapiens]	0.000121117	10.0996	20587.7	4502203	1 (1 0 0 0 0)
immunglobulin heavy chain variable region [Homo sapiens]	0.000193255	10.0989	13666.7	109693293	3 (1 1 1 0 0)
XIAP associated factor-1 (ZAP-1) [Homo sapiens] [MA	0.000714057	10.0977	36890.9	1869901	2 (1 0 0 1 0)
unnamed protein product [Homo sapiens]	0.00227601	10.0954	20025.1	37610	1 (1 0 0 0 0)
A Chain A, Crystal Structure Analysis Of The Human Tub Protein (Isoform A) Spa	0.00646009	10.0952	30738.6	60593459	1 (1 0 0 0 0)
HSP71_HUMAN Heat shock 70 kDa protein 1 (HSP70.1) (HSP70-1/HSP70-2)	0.000682601	10.0914	70009.2	147744565	1 (1 0 0 0 0)
tropomodulin 2 (neuronal) [Homo sapiens]	0.000144885	10.0909	39570.7	7657647	1 (1 0 0 0 0)
K1 protein [Human herpesvirus 8]	0.00293245	10.0897	8227.23	37576742	2 (1 1 0 0 0)
envelope glycoprotein [Human immunodeficiency virus 1]	0.00535645	10.0887	23428.8	31872883	1 (1 0 0 0 0)
Human Diff6,H5,CDC10 homologue [Homo sapiens]	0.00740413	10.0881	46555.7	1040689	1 (1 0 0 0 0)
HESB like domain containing 1 [Homo sapiens]	0.00326432	10.0878	16413.1	34996487	1 (1 0 0 0 0)
tyrosine 3/tryptophan 5 -monooxygenase activation protein, theta polype	5.50133e-05	10.0871	27746.8	5803227	1 (1 0 0 0 0)
tripartite motif-containing 39 [Homo sapiens]	0.00411156	10.0871	26308.5	123270108	1 (1 0 0 0 0)
unnamed protein product [Homo sapiens]	0.00634662	10.0867	54476.8	30215	1 (1 0 0 0 0)
immunoglobulin superfamily, member 1 isoform 1 [Homo sapiens]	0.00685726	10.0866	148839	45505167	1 (1 0 0 0 0)
envelope glycoprotein [Human immunodeficiency virus type 1]	0.00384097	10.0861	24557.3	6318469	2 (1 1 0 0 0)
beta-1,4-N-acetyl-galactosaminyl transferase 2, isoform CRA_b [Homo sap	0.00957699	10.0847	54169.3	119615097	1 (1 0 0 0 0)
PLIN_HUMAN Perilipin (PERI) (Lipid droplet-associated protein)	0.000389034	10.0839	55915.9	8134637	1 (1 0 0 0 0)
immunoglobulin lambda light chain [Homo sapiens] [MA	0.000820206	10.0835	10643.3	4566097	1 (1 0 0 0 0)
carbohydrate (chondroitin 4) sulfotransferase 12, isoform CRA_a [Homo s	0.00413469	10.0823	18373.3	119607649	1 (1 0 0 0 0)
Vif protein [Human immunodeficiency virus 1]	0.00907398	10.0807	22661.8	7416634	1 (1 0 0 0 0)
ATPase, H+ transporting, lysosomal, V0 subunit d1 [Homo sapiens]	0.00195496	10.0804	40303.3	19913432	1 (1 0 0 0 0)
GDAP1_HUMAN Ganglioside-induced differentiation-associated protein 1 (GDAP1)	0.0025655	10.0799	41225.8	38257679	1 (1 0 0 0 0)
gag protein [Human immunodeficiency virus 1]	0.000978243	10.0798	55769.5	124389770	1 (1 0 0 0 0)
hepatic lipase precursor	0.00971141	10.0796	55817.8	307129	1 (1 0 0 0 0)
envelope glycoprotein [Human immunodeficiency virus 1]	0.00197404	10.0792	96918.6	38491645	1 (1 0 0 0 0)
ADT3_HUMAN ADP/ATP translocase 3 (Adenine nucleotide translocator 2) (ANT 3) (A	0.00480008	10.0791	32845.2	113463	1 (1 0 0 0 0)
AF156973_1 nasopharyngeal carcinoma down-regulated protein [Homo sapiens]	4.10384e-05	10.0791	9932.97	21538811	2 (1 0 1 0 0)
SI:bZ6L08.1 (novel protein similar to human cadherin, EGF LAG seven-pas	0.00324956	10.0763	197357	26788046	2 (1 0 1 0 0)
hypothetical protein [Homo sapiens]	0.000995985	10.076	17793	33151162	1 (1 0 0 0 0)
NADH dehydrogenase (ubiquinone) 1 beta subcomplex, 7, 18kDa [Homo sapi	4.08326e-05	10.0742	16391.3	10764847	1 (1 0 0 0 0)
unnamed protein product [Homo sapiens]	0.00327428	10.0738	30685.2	7022078	2 (0 0 1 1 0)
pro protein [Homo sapiens]	0.00422291	10.0734	36122.9	21913257	1 (1 0 0 0 0)
LIM-homeodomain (LHX) protein 6.1a [Homo sapiens] [	0.00993635	10.0733	40017.7	5738958	1 (1 0 0 0 0)
guanine nucleotide-binding protein, beta-1 subunit [Mus musculus]	0.000557472	10.0733	37353	6680045	1 (1 0 0 0 0)
peptidylprolyl isomerase A [Mus musculus]	1.30985e-05	10.0731	17959.8	6679439	1 (1 0 0 0 0)
structural protein 2 [Rotavirus C]	0.00761537	10.0728	101609	80984707	2 (2 0 0 0 0)
novel protein [Homo sapiens]	0.00110185	10.0726	196288	11990779	2 (0 0 1 1 0)
L1 [Human papillomavirus type 18]	0.00800616	10.0721	3725.93	25272124	1 (1 0 0 0 0)
gag protein [Human immunodeficiency virus 1]	0.00696869	10.0715	16489.4	112819528	2 (1 0 1 0 0)
hexon protein [Human adenovirus type 18]	0.00830133	10.0713	24126.7	69139600	1 (1 0 0 0 0)
seven transmembrane helix receptor [Homo sapiens]	0.00260097	10.0712	28588.7	27348189	1 (1 0 0 0 0)
hCG1820410 [Homo sapiens]	0.00571753	10.0711	9937.88	119595162	2 (1 0 0 1 0)
gag protein [Human immunodeficiency virus 1]	0.00181533	10.0709	54133.6	124389774	2 (0 0 1 1 0)
SI:dZ248F2.1 (novel protein similar to human ciliary neurotrophic facto	0.00530949	10.0707	19677.6	27801589	1 (1 0 0 0 0)
rev protein [Human immunodeficiency virus 1]	0.00579382	10.0704	13050.9	47118255	1 (1 0 0 0 0)
STIM2 protein [Homo sapiens]	0.00266739	10.0703	9160.76	116283867	1 (1 0 0 0 0)
heterogeneous nuclear ribonucleoprotein H2 [Homo sapiens]	0.00316234	10.0701	49232.3	9624998	6 (0 2 1 2 1)
phospholipase C, eta 2 [Homo sapiens]	0.00792275	10.07	154571	78499633	1 (1 0 0 0 0)
envelope glycoprotein [Human immunodeficiency virus 1]	0.00613953	10.0693	12258.5	24079937	1 (1 0 0 0 0)
envelope glycoprotein [Human immunodeficiency virus 1]	0.0094663	10.0691	20803.2	119221018	2 (1 0 1 0 0)
envelope glycoprotein [Human immunodeficiency virus 1]	0.00290952	10.069	12772	148789618	1 (1 0 0 0 0)
unnamed protein product [Homo sapiens]	0.0059358	10.0687	38901.5	21752181	1 (1 0 0 0 0)
hCG2010747 [Homo sapiens]	0.000324748	10.0686	11936.9	119579985	3 (1 0 0 1 1)
KIAA0341 [Homo sapiens]	0.000999433	10.0681	60677.9	2224623	1 (1 0 0 0 0)
hCG2041858 [Homo sapiens]	0.000205151	10.0681	12185.9	119606935	1 (1 0 0 0 0)
pol protein [Human immunodeficiency virus 1]	0.00794732	10.0678	10166.2	73913379	5 (1 1 2 1 0)
MYH6_HUMAN Myosin-6 (Myosin heavy chain 6) (Myosin heavy chain, cardiac muscle	0.0075494	10.0672	223550	3041706	1 (1 0 0 0 0)
HSPA8 protein [Homo sapiens]	0.00440594	10.0672	64633.2	48257068	2 (1 0 1 0 0)
cysteine and glycine-rich protein 1 [Homo sapiens]	0.000107	10.0664	20553.8	4758086	1 (1 0 0 0 0)
protease [Human immunodeficiency virus 1]	0.00674428	10.0658	10769.8	32185856	1 (1 0 0 0 0)
solute carrier family 5 (inositol transporters), member 3 [Homo sapie	0.00566899	10.0656	79641.4	110835708	4 (0 0 1 0 3)
major capsid protein [Human herpesvirus 2]	0.00085399	10.0655	149143	9629288	1 (1 0 0 0 0)
pol polyprotein [Human immunodeficiency virus type 1]	0.00518555	10.0654	44130.1	10953434	1 (1 0 0 0 0)
hCG28178, isoform CRA_a [Homo sapiens]	0.00676243	10.0652	16764.5	119607858	1 (1 0 0 0 0)
heat shock protein 90kDa alpha (cytosolic), class A member 1 isoform 2	0.000961165	10.0651	84620.7	40254816	1 (1 0 0 0 0)
MAX protein isoform b [Homo sapiens]	0.00086719	10.0645	17191.4	21704263	1 (1 0 0 0 0)
unnamed protein product [Homo sapiens]	0.00859789	10.0638	21543.1	34534958	1 (1 0 0 0 0)
N-acylaminoacyl-peptide hydrolase [Homo sapiens]	0.00695236	10.063	81172.8	23510451	2 (1 1 0 0 0)
MLH3_HUMAN DNA mismatch repair protein Mlh3 (MutL protein homolog 3)	0.0079718	10.0629	163608	13878584	2 (0 1 0 0 1)
ATPase, H+ transporting, lysosomal, V0 subunit c [Homo sapiens]	0.00115285	10.0628	15725.5	4502313	1 (1 0 0 0 0)
Gag [Human immunodeficiency virus 1]	0.00728497	10.0628	56468.7	119507400	1 (1 0 0 0 0)
DDX19-like protein [Homo sapiens]	0.00229322	10.0628	53940.9	8922886	1 (1 0 0 0 0)
AF397156_3 minor structural protein [Human calicivirus NLV/MOH/99]	0.00615421	10.0628	23244.6	15128162	2 (0 0 1 1 0)
TPA: mini-chromosome maintenance deficient 9 [Homo sapiens]	0.00180108	10.0628	127258	86198292	1 (1 0 0 0 0)
retina specific protein PAL [Homo sapiens]	0.00647711	10.0626	67997.5	14149694	1 (1 0 0 0 0)
neurofilament-66; NF-66 [Homo sapiens]	0.00850454	10.0625	54875.2	994844	1 (1 0 0 0 0)
hypothetical protein LOC150771 isoform 2 [Homo sapiens]	0.00243869	10.0621	63354.2	57164960	2 (0 1 0 0 1)
KVLQT1 isoform1 [Homo sapiens]	0.00157809	10.0621	74317.1	3953684	2 (0 0 1 1 0)
unnamed protein product [Homo sapiens]	0.00982345	10.0619	90628.1	10438152	1 (1 0 0 0 0)
calcium/calmodulin-dependent protein kinase II gamma [Rattus norvegicu	3.4493e-05	10.0611	59001.1	19424316	1 (1 0 0 0 0)
unnamed protein product [Mus musculus]	0.00602031	10.0607	28214.5	26329841	1 (1 0 0 0 0)
hCG1791919, isoform CRA_a [Homo sapiens]	0.0026637	10.0606	56769.7	119575152	2 (2 0 0 0 0)
AJHUQ glutamate-ammonia ligase (EC 6.3.1.2) - human	0.0015919	10.0599	42138.4	25754242	1 (1 0 0 0 0)
NADH dehydrogenase subunit 4L [Homo sapiens]	0.00945364	10.0589	10707.6	116241656	1 (1 0 0 0 0)
ephrin receptor EphB2 isoform 2 precursor [Homo sapiens]	0.00216711	10.0569	109959	21396504	1 (1 0 0 0 0)
Fanconi anemia, complementation group C [Homo sapiens]	0.00320661	10.0563	63387.7	56118236	1 (1 0 0 0 0)
T-cell receptor delta chain [Homo sapiens]	0.00393669	10.0562	2991.18	2239566	1 (1 0 0 0 0)
hCG1990845 [Homo sapiens]	0.00748593	10.056	15563.7	119619947	1 (1 0 0 0 0)
polymerase basic protein 1 [Influenza A virus (A/chicken/British Columbi	0.00550239	10.0559	86309.5	50542650	1 (1 0 0 0 0)
LSM11, U7 small nuclear RNA associated [Homo sapiens]	0.00472563	10.0553	39475.7	27735089	3 (0 1 1 1 0)
transcription initiation factor IIIB isoform 1 [Homo sapiens]	0.00517334	10.0552	73793.9	22035556	1 (1 0 0 0 0)
beta globin chain variant [Homo sapiens]	0.0035152	10.0551	15987.3	26892090	1 (1 0 0 0 0)
gag p17 [Human immunodeficiency virus 1]	0.00637915	10.0551	14895	62087052	1 (1 0 0 0 0)
unnamed protein product [Homo sapiens]	0.000614147	10.0546	40218.9	34532792	1 (1 0 0 0 0)
AC007956_1 unknown [Homo sapiens]	0.00781873	10.054	204820	7341427	1 (1 0 0 0 0)
N-terminally extended type 3 canonical transient receptor potential chan	0.000637216	10.0537	105470	58003731	1 (1 0 0 0 0)
calcium channel, voltage-dependent, L type, alpha 1B subunit variant [H	0.0073177	10.0535	153638	62088514	1 (1 0 0 0 0)
2'-5' oligoadenylate synthetase 3 [Homo sapiens] [	0.00623213	10.0535	121159	11527773	1 (1 0 0 0 0)
unnamed protein product [Homo sapiens]	0.00422814	10.0533	115755	34533183	1 (1 0 0 0 0)
FIM protein [Homo sapiens]	0.00382944	10.0524	155052	3135792	1 (1 0 0 0 0)
small nuclear RNA activating complex, polypeptide 1, 43kDa [Homo sapien	0.00692032	10.0524	42967.2	4507101	2 (0 0 1 1 0)
hCG36734 [Homo sapiens]	0.00755454	10.0515	64280.6	119605337	2 (0 1 0 0 1)
3D RNA polymerase [Human rhinovirus 87]	0.00824039	10.0507	16398.5	24614648	1 (1 0 0 0 0)
unnamed protein product [Homo sapiens]	0.00351383	10.0504	33359.2	21754179	1 (1 0 0 0 0)
unnamed protein product [Homo sapiens]	0.00435972	10.0485	38549.6	10436254	1 (1 0 0 0 0)
serine/threonine kinase receptor associated protein [Homo sapiens]	0.0050503	10.0473	38414	148727341	1 (1 0 0 0 0)
S25745 Ig lambda chain - human (fragment)	0.000435272	10.0469	24322	106657	1 (1 0 0 0 0)
cell death-regulatory protein GRIM19 [Homo sapiens]	0.00754357	10.0467	25848.4	21361822	1 (1 0 0 0 0)
KIAA2020 protein [Homo sapiens]	0.009608	10.0465	61255.1	24899204	1 (1 0 0 0 0)
aminoadipate-semialdehyde synthase [Homo sapiens]	0.00133792	10.0464	102067	13027640	1 (1 0 0 0 0)
WDR13 protein [Homo sapiens]	0.00326349	10.0452	58678.8	45501300	1 (1 0 0 0 0)
TECTA_HUMAN Alpha-tectorin precursor	0.00130352	10.0424	239268	48428570	3 (1 0 1 0 1)
unnamed protein product [Homo sapiens]	0.00203124	10.0418	35543.1	22760013	1 (1 0 0 0 0)
envelope glycoprotein [Human immunodeficiency virus 1]	0.0089819	10.0412	7765.08	48526835	1 (1 0 0 0 0)
LOC440419 protein [Homo sapiens]	0.0091861	10.041	7261.48	85662626	1 (1 0 0 0 0)
unnamed protein product [Homo sapiens]	0.00841389	10.0409	59577.2	21749674	1 (1 0 0 0 0)
TOP2B_HUMAN DNA topoisomerase 2-beta (DNA topoisomerase II, beta isozyme) [MA	0.00157097	10.0396	183152	20141946	1 (1 0 0 0 0)
KISH2; hKISH2; Kismet homolog 2 [Homo sapiens] [MAS	5.27491e-05	10.0396	323949	49476336	1 (1 0 0 0 0)
unnamed protein product [Homo sapiens]	0.00946713	10.0378	19206.9	21758272	1 (1 0 0 0 0)
ZN257_HUMAN Zinc finger protein 257 (Bone marrow zinc finger 4) (BMZF-4)	0.0045452	10.0368	62307.5	12585552	1 (1 0 0 0 0)
squamous cell carcinoma antigen recognized by T cells 3 [Homo sapiens]	0.00971032	10.0365	109865	7661952	2 (0 1 0 0 1)
CCD70_HUMAN Coiled-coil domain-containing protein 70 precursor	0.00816228	10.0315	28748.3	74748971	1 (1 0 0 0 0)
unnamed protein product [Homo sapiens]	0.00011324	8.17293	40513	7021051	8 (2 3 1 2 0)
fiber protein [Human adenovirus type 23]	0.00024343	8.16012	32931.8	82523578	1 (0 1 0 0 0)
hypothetical protein [Human calicivirus Hu/NLV/Queen's Arms/Leeds/92/UK	0.00458289	8.15914	22089.1	14330431	8 (0 7 0 1 0)
AF166243_1 polyprotein [Human coxsackievirus A9] [MAS	0.00559973	8.14285	14608	6752609	1 (0 1 0 0 0)
hypothetical protein LOC345651 [Homo sapiens]	0.000212371	8.14045	41976	63055057	2 (0 1 1 0 0)
neurofilament, light polypeptide 68kDa, isoform CRA_b [Homo sapiens] [M	0.000317749	8.13873	56924	119584005	1 (0 1 0 0 0)
AACS protein [Homo sapiens]	0.000120322	8.13678	45607.8	71297231	12 (1 8 2 1 0)
S34775 nicotinic acetylcholine receptor epsilon chain precursor - human	0.000199985	8.12458	54581.4	479584	1 (0 1 0 0 0)
hCG2041853 [Homo sapiens]	0.00348388	8.12025	12109.1	119606879	1 (0 1 0 0 0)
WMBEHQ UL5 protein - human herpesvirus 2 (strain HG52) (fragment)	0.00249829	8.11826	88093.8	74001	1 (0 1 0 0 0)
AF204421_1 envelope glycoprotein [Human immunodeficiency virus type 1] [MA	0.000244077	8.10879	22923.3	6540322	2 (0 2 0 0 0)
parathyroid hormone-responsive B1 isoform 2 [Homo sapiens]	0.00366608	8.10524	99217.4	38569434	1 (0 1 0 0 0)
hCG1787594, isoform CRA_a [Homo sapiens]	0.00978368	8.10225	9041.65	119626230	3 (0 1 2 0 0)
envelope glycoprotein [Human immunodeficiency virus type 1]	0.0067927	8.10176	97096	1079597	1 (0 1 0 0 0)
ATF7IP protein [Homo sapiens]	0.00909452	8.10129	55193.9	27371126	1 (0 1 0 0 0)
reverse transcriptase [Human immunodeficiency virus 1]	0.00716817	8.10055	32923	55705774	2 (0 1 1 0 0)
MYH8_HUMAN Myosin-8 (Myosin heavy chain 8) (Myosin heavy chain, skeletal muscl	7.44355e-05	8.09962	222624	3041707	1 (0 1 0 0 0)
Na,K-ATPase catalytic subunit alpha-A protein [Homo sapiens]	0.00474601	8.09743	3563.7	5919228	2 (0 2 0 0 0)
envelope glycoprotein [Human immunodeficiency virus 1]	0.00297835	8.09637	23701.8	62904237	2 (1 1 0 0 0)
homer 2 isoform 1 [Homo sapiens]	0.00321566	8.09186	39443.1	46249349	1 (0 1 0 0 0)
CCD19_HUMAN Coiled-coil domain-containing protein 19 (Nasopharyngeal epitheli	0.00392022	8.09092	46224	20139283	2 (0 0 0 2 0)
electron-transfer-flavoprotein, beta polypeptide isoform 1 [Homo sapien	0.00210244	8.0876	27826.2	4503609	1 (0 1 0 0 0)
envelope glycoprotein [Human immunodeficiency virus 1]	0.00209896	8.0859	13752.7	32186108	1 (0 1 0 0 0)
actin-like protein [Homo sapiens]	2.98921e-05	8.08559	11548	62420916	1 (0 1 0 0 0)
BXDCP_HUMAN Putative Brix domain containing protein 1P [	0.000139948	8.08422	29550.7	30580376	1 (0 1 0 0 0)
novel protein [Homo sapiens]	0.00106411	8.08408	10345.1	55957548	1 (0 1 0 0 0)
unnamed protein product [Homo sapiens]	0.00909761	8.08327	47855.3	34530534	2 (0 2 0 0 0)
ring finger and CCCH-type zinc finger domains 2 [Homo sapiens]	0.000430758	8.08052	96287.6	9256537	1 (0 1 0 0 0)
nef protein [Human immunodeficiency virus 1]	0.00970661	8.07969	22027.9	71801506	3 (0 1 2 0 0)
unnamed protein product [Homo sapiens]	0.00352888	8.07959	48890.8	28375585	2 (0 0 1 0 1)
hCG2039901, isoform CRA_a [Homo sapiens]	0.00166137	8.07955	7472.09	119569027	1 (0 1 0 0 0)
TPH2 protein [Homo sapiens]	0.00805879	8.07822	56668.4	109730343	2 (0 1 0 0 1)
oligomycin sensitivity conferral protein oscp-like protein [Homo sapiens]	0.00786259	8.07809	7423.77	8178226	1 (0 1 0 0 0)
coiled-coil domain containing 127 [Homo sapiens]	0.00167262	8.07732	30815	21687127	1 (0 1 0 0 0)
LOC348180 protein [Homo sapiens]	0.00779761	8.07612	38205.7	27924143	1 (0 1 0 0 0)
interferon alpha/beta receptor [Homo sapiens]	0.00669414	8.07562	37350.9	488364	1 (0 1 0 0 0)
unknown [Homo sapiens]	0.00650188	8.07518	26388	1710214	1 (0 1 0 0 0)
VS09_ROTHA Glycoprotein VP7 (Serotype-specific antigen) (Outer shell glycoprote	0.00326184	8.07446	37178.7	139523	1 (0 1 0 0 0)
ring finger protein 212 [Homo sapiens]	0.00222663	8.07412	26373.3	37059810	1 (0 1 0 0 0)
chromosome 6 open reading frame 142, isoform CRA_b [Homo sapiens]	0.00205361	8.07352	97454.6	119624839	1 (0 1 0 0 0)
prion protein [Homo sapiens]	4.63203e-07	8.07029	26866.9	29568940	1 (0 1 0 0 0)
CBPA2_HUMAN Carboxypeptidase A2 precursor	0.00412412	8.07009	46798.6	20532384	4 (0 3 0 0 1)
AF278765_1 kappa B and V(D)J recombination signal sequences binding prote	0.0046119	8.06951	259222	12658305	1 (0 1 0 0 0)
SMARCA1 protein [Homo sapiens]	0.000270873	8.06698	2928.71	30705016	2 (0 1 0 0 1)
eukaryotic translation elongation factor 1 delta (guanine nucleotide ex	0.000299624	8.06669	15702.7	119602641	1 (0 1 0 0 0)
PHOSP_PI1HD Phosphoprotein (Protein P)	0.00976744	8.06514	64605	1350910	2 (0 0 1 0 1)
AF076475_8 envelope glycoprotein [Human immunodeficiency virus type 1] [MA	0.00577714	8.06483	99378.1	5668930	1 (0 1 0 0 0)
AF178183_1 envelope glycoprotein, V3 region [Human immunodeficiency virus	0.00477773	8.06458	12263.5	6110428	1 (0 1 0 0 0)
calcium/calmodulin-dependent protein kinase IG [Homo sapiens]	0.000135109	8.06446	27823.5	56202635	2 (0 0 0 2 0)
placenta-specific 9, isoform CRA_a [Homo sapiens]	0.0084499	8.06416	14868	119600812	1 (0 1 0 0 0)
unnamed protein product [Homo sapiens]	0.00234198	8.06385	18265.3	47077431	1 (0 1 0 0 0)
hCG1985533 [Homo sapiens]	0.00407646	8.06316	14224.3	119611079	2 (1 1 0 0 0)
unnamed protein product [Homo sapiens]	0.00243305	8.06296	49420.9	7023159	1 (0 1 0 0 0)
carcinoembryonic antigen-related cell adhesion molecule isoform 1	0.00306107	8.06196	32334.2	148612793	1 (0 1 0 0 0)
syntaxin 6 [Homo sapiens]	0.00723123	8.0618	29157.8	5032131	1 (0 1 0 0 0)
envelope glycoprotein [Human immunodeficiency virus 1]	0.00225213	8.06162	20138.1	125395695	1 (0 1 0 0 0)
nef protein [Human immunodeficiency virus 1]	0.00225023	8.0616	23434.6	85035376	1 (0 1 0 0 0)
reverse transcriptase [Human immunodeficiency virus 1]	0.00755638	8.06055	22182.4	67082321	1 (0 1 0 0 0)
envelope glycoprotein [Human immunodeficiency virus 1]	0.00483533	8.05924	25550.9	27801891	1 (0 1 0 0 0)
gp120 protein [Human immunodeficiency virus 1] [MA	0.00453608	8.05918	21172.6	34786242	1 (0 1 0 0 0)
envelope glycoprotein [Human immunodeficiency virus type 1]	0.00689385	8.05847	46372.5	1946826	3 (1 1 0 0 1)
KIAA0141 [Homo sapiens]	0.00563633	8.05846	55915.4	15080339	1 (0 1 0 0 0)
solute carrier family 22 member 7 isoform b [Homo sapiens]	0.00544514	8.05834	59987.6	90669191	1 (0 1 0 0 0)
novel protein similar to translocase of outer mitochondrial membrane 2	0.00144451	8.05818	9509.12	123211151	1 (0 1 0 0 0)
ICBP90 binding protein 1 [Homo sapiens]	0.00628296	8.0569	159384	134152667	1 (0 1 0 0 0)
vpr protein [Human immunodeficiency virus type 2] [M	0.00113883	8.05674	11930.1	4007996	1 (0 1 0 0 0)
antigen MLAA-20 [Homo sapiens]	0.00210836	8.05642	28066.3	37574652	1 (0 1 0 0 0)
Tripartite motif-containing 60 [Homo sapiens]	0.00242385	8.05427	55090.1	71681736	1 (0 1 0 0 0)
unnamed protein product [Homo sapiens]	0.00326164	8.05312	17468.1	34529638	1 (0 1 0 0 0)
UL98 [Human herpesvirus 5 strain AD169]	0.00777375	8.05276	65231.5	9625784	2 (0 0 0 2 0)
fatty acid binding protein 5 (psoriasis-associated) [Homo sapiens]	0.0060898	8.05274	15154.5	4557581	1 (0 1 0 0 0)
100K [Human adenovirus type 11]	0.00457463	8.05252	91014.8	56160795	2 (0 0 1 0 1)
RIPK4_HUMAN Receptor-interacting serine/threonine-protein kinase 4 (Ankyrin r	0.00387517	8.05246	91553.7	10719883	1 (0 1 0 0 0)
hypothetical protein LOC51241 [Homo sapiens]	0.00778426	8.05172	12285.5	7706011	1 (0 1 0 0 0)
T-cell receptor delta chain [Homo sapiens]	0.00393669	8.05137	2991.21	2239769	1 (0 1 0 0 0)
envelope glycoprotein [Human immunodeficiency virus 1]	0.00282736	8.05108	96836.1	90993870	1 (0 1 0 0 0)
hCG32587 [Homo sapiens]	0.0040642	8.0508	14726.5	119622547	1 (0 1 0 0 0)
C Chain C, Crystal Structure Analysis Of A Ternary S-Domain Complex Of Human S	0.00951151	8.0493	14698.3	24159063	1 (0 1 0 0 0)
hypothetical protein [Homo sapiens]	0.00730759	8.04927	245401	50950036	2 (0 0 1 0 1)
fibrinogen, alpha polypeptide isoform alpha-E preproprotein [Homo sapie	0.00273963	8.04904	94914.3	4503689	1 (0 1 0 0 0)
envelope glycoprotein [Human immunodeficiency virus 1]	0.00607562	8.0489	22440.3	148629151	1 (0 1 0 0 0)
histidine-tRNA ligase [Dictyostelium discoideum AX4]	0.003332	8.04635	54458.6	66821749	1 (0 1 0 0 0)
exportin 7, isoform CRA_a [Homo sapiens]	0.00204482	8.04617	123997	119584137	1 (0 1 0 0 0)
rev protein [Human immunodeficiency virus 1]	0.00988886	8.04424	13004.8	86277642	1 (0 1 0 0 0)
A Chain A, Human Tetrahydrofolate Dehydrogenase CYCLOHYDROLASE	0.0026091	8.04002	32589	4558256	2 (0 0 0 2 0)
S31674 Ig heavy chain V region - human (fragment)	0.00767036	8.03831	15351.6	346143	1 (0 1 0 0 0)
SEM4D_HUMAN Semaphorin-4D precursor (Leukocyte activation antigen CD100) (BB18	0.0082835	8.03767	96088.8	8134701	1 (0 1 0 0 0)
unnamed protein product [Homo sapiens]	0.00539875	8.03575	16219.4	10434139	1 (0 1 0 0 0)
phosphoprotein [Human parainfluenza virus 1]	0.00976744	8.03199	64452.9	19718366	1 (0 1 0 0 0)
hCG1645235, isoform CRA_b [Homo sapiens]	0.00559701	6.08295	26510.1	119592769	2 (0 1 1 0 0)
nef protein [Human immunodeficiency virus 1]	0.00970661	6.07969	14281.2	90192289	3 (0 1 1 1 0)
interleukin 29 [Homo sapiens]	0.00568512	6.07263	21884.7	26024325	2 (0 0 0 1 1)
SMCA5_HUMAN SWI/SNF-related matrix-associated actin-dependent regulator of ch	0.00378242	6.06099	121828	57014128	2 (0 1 1 0 0)
hypothetical protein [Homo sapiens]	0.00649167	6.05025	21949	12052788	2 (0 0 0 1 1)
zinc finger protein, Y-linked [Homo sapiens]	0.00746167	4.06485	90446.7	33239440	2 (0 0 0 0 2)
gamma delta T cell antigen receptor delta-chain=CDR3 region [human, skin l	4.63645e-05	4.06142	1508.71	245016	3 (0 1 0 1 1)
KIAA0234 [Homo sapiens]	0.00465751	4.05398	170347	40788921	2 (0 0 0 0 2)
hypothetical protein [Homo sapiens]	0.00269195	2.14591	25872.1	52545875	6 (0 3 2 0 1)
unnamed protein product [Homo sapiens]	0.00489235	2.07605	20379.3	28375487	2 (1 0 0 0 1)

## Sheet: Control_4_UT
Description	P-value	Score	MW	Accession	Peptide (Hits)
2',3'-cyclic-nucleotide 3'-phosphodiesterase (EC 3.1.4.37)	3.93126e-09	292.23	45070.4	180687	45 (39 2 3 0 1)
I38369 beta-tubulin - human (fragment)	6.65716e-11	284.272	48848.5	2119276	104 (88 4 10 0 2)
brain creatine kinase [Homo sapiens]	2.60301e-09	192.275	42617.4	21536286	60 (45 7 3 2 3)
syntaxin binding protein 1 isoform a [Homo sapiens]	1.00415e-08	182.207	68692.3	4507297	26 (18 6 1 1 0)
neurofilament, light polypeptide 68kDa [Homo sapiens]	3.0587e-05	182.175	61479.3	105990539	21 (17 2 1 0 1)
N-ethylmaleimide-sensitive factor [Homo sapiens]	1.11867e-07	172.187	82602.2	11079228	23 (18 3 1 0 1)
ATP synthase, H+ transporting, mitochondrial F1 complex, alpha subunit	1.4258e-09	158.215	59713.7	4757810	29 (23 2 1 0 3)
tubulin, beta 4 [Homo sapiens]	9.5246e-12	154.274	49553.9	21361322	100 (75 21 4 0 0)
neurofilament, medium polypeptide 150kDa [Homo sapiens]	2.03842e-11	144.19	102386	4885513	19 (13 1 1 3 1)
brain abundant, membrane attached signal protein 1 [Homo sapiens]	7.04689e-10	140.215	22680	30795231	25 (24 0 0 0 1)
voltage-dependent anion channel 1 [Homo sapiens]	1.10169e-10	138.182	30753.6	4507879	20 (18 2 0 0 0)
tubulin alpha 6 [Homo sapiens]	2.24498e-11	134.253	49863.5	14389309	68 (58 5 2 1 2)
KIAA0968 protein [Homo sapiens]	1.2218e-09	126.188	58985.2	4589580	26 (19 3 4 0 0)
A40671 dynamin, internal form 1, long C-terminal form - human [M	5.38236e-12	108.33	97201	539580	14 (13 1 0 0 0)
VDAC2 [Homo sapiens]	2.17016e-10	108.191	30393	48146045	16 (15 1 0 0 0)
tubulin, beta, 4 [Homo sapiens]	9.5246e-12	104.264	50400.3	50592996	41 (24 15 1 0 1)
S68466 translation elongation factor EF-Tu-like protein P43 precursor, mitochondria	2.94483e-08	98.191	49502.2	7443384	10 (9 1 0 0 0)
A Chain A, Crystal Structure Of A DictyosteliumTETRAHYMENA CHIMERA Actin (Mutan	3.80039e-08	96.1977	41719.9	7245526	20 (17 2 1 0 0)
tubulin, alpha-like 3 [Homo sapiens]	2.09939e-06	84.1446	49876.8	13376181	21 (16 3 1 1 0)
contactin 1 isoform 1 precursor [Homo sapiens]	3.76742e-05	84.1358	113249	28373117	10 (8 1 1 0 0)
microtubule-associated protein 2 [Homo sapiens]	1.23925e-06	82.1244	199045	1850617	11 (5 2 1 2 1)
tubulin, beta 2 [Homo sapiens]	1.01592e-08	80.1908	49875	4507729	23 (21 2 0 0 0)
KIAA0820 protein [Homo sapiens]	3.92869e-10	78.2873	99887.1	20521666	12 (7 4 0 1 0)
proteolipid protein [Rattus norvegicus]	0.000192005	78.1776	30057.1	13591880	19 (17 1 1 0 0)
KIAA0987 protein [Homo sapiens]	6.21809e-09	76.1606	123629	4589618	11 (7 0 1 2 1)
ANK2_HUMAN Ankyrin-2 (Brain ankyrin) (Ankyrin-B) (Ankyrin, nonerythroid)	3.27957e-05	76.1563	430079	1703310	10 (4 2 2 2 0)
KIAA0417 [Homo sapiens]	3.89635e-07	74.2018	78381.4	2887409	8 (6 1 1 0 0)
protein kinase C, gamma [Homo sapiens]	4.59501e-07	74.167	78397.3	13384594	9 (5 1 2 1 0)
calcium/calmodulin-dependent protein kinase IIB isoform 8 [Homo sapien	1.00812e-07	72.1356	50923	26051218	13 (8 1 4 0 0)
VPP1_HUMAN Vacuolar proton translocating ATPase 116 kDa subunit a isoform 1 (	4.14138e-06	72.1286	96350.3	59803038	10 (8 0 2 0 0)
microtubule-associated protein 1B isoform 1 [Homo sapiens]	4.33041e-07	72.1152	270452	5174525	9 (5 1 2 0 1)
tubulin, alpha 1B [Mus musculus]	4.15796e-10	70.2259	50119.6	34740335	36 (35 1 0 0 0)
Na+/K+ -ATPase alpha 2 subunit proprotein [Homo sapiens]	2.22931e-09	70.1841	112194	4502271	13 (8 2 1 0 2)
myelin basic protein isoform 1 [Homo sapiens]	1.65309e-05	70.1813	21480	68509930	12 (7 0 1 3 1)
eukaryotic translation elongation factor 1 alpha 1 [Homo sapiens]	1.17685e-05	70.1016	50109.2	4503471	8 (6 1 0 0 1)
GNAO2_HUMAN Guanine nucleotide-binding protein G(o) subunit alpha 2	5.96268e-07	68.1707	40061.1	60416433	8 (7 1 0 0 0)
Na+,K+ ATPase [Homo sapiens]	1.56079e-09	60.2611	111901	1359715	6 (6 0 0 0 0)
dihydropyrimidinase-like 2 [Homo sapiens]	0.000208712	60.1757	62254.7	4503377	8 (8 0 0 0 0)
Na+/K+ -ATPase alpha 1 subunit isoform a proprotein [Homo sapiens]	3.77476e-13	58.2689	112824	21361181	8 (7 1 0 0 0)
crystallin, alpha B [Homo sapiens]	9.10383e-11	58.193	20146.4	4503057	6 (5 1 0 0 0)
ATRB actin, skeletal muscle - rabbit	2.2663e-05	58.1592	41789.8	71611	14 (9 3 1 0 1)
protein kinase C, alpha [Homo sapiens]	8.45358e-05	58.1518	76714.2	4506067	7 (5 0 1 0 1)
voltage-dependent anion channel 3 [Homo sapiens]	0.000450024	58.1148	30639.3	25188179	7 (6 1 0 0 0)
glial fibrillary acidic protein [Homo sapiens]	1.29783e-07	56.1536	49849.7	4503979	8 (5 2 0 1 0)
N Chain N, Mutant Monomer Of Recombinant Human Hexokinase Type I Complexed With	1.70676e-07	56.1514	102383	7245424	7 (6 0 1 0 0)
synaptosomal-associated protein 25 isoform SNAP25A [Homo sapiens]	2.15072e-11	50.1991	23321.2	18765733	6 (6 0 0 0 0)
unnamed protein product [Homo sapiens]	2.95728e-08	50.1978	49811	10433717	24 (9 7 8 0 0)
solute carrier family 25 (mitochondrial carrier; adenine nucleotide tr	3.0931e-08	50.1386	33043.2	55749577	7 (7 0 0 0 0)
KIAA0338 [Homo sapiens]	0.000224677	50.1369	103516	2224617	5 (5 0 0 0 0)
Na+/K+ -ATPase beta 1 subunit isoform a [Homo sapiens]	0.000239849	50.114	35038.9	4502277	6 (6 0 0 0 0)
unnamed protein product [Homo sapiens]	7.15534e-10	48.2225	57919.5	28940	6 (5 1 0 0 0)
B46091 H+-exporting ATPase (EC 3.6.3.6) chain A, vacuolar (VA68 type) - human	0.000954833	48.1263	68204.5	1082432	6 (4 1 1 0 0)
synapsin I isoform Ia [Homo sapiens]	0.00014976	48.1145	74065.8	19924099	5 (4 1 0 0 0)
ubiquinol-cytochrome c reductase core protein II [Homo sapiens]	3.16513e-11	46.1525	48412.9	50592988	6 (5 0 1 0 0)
tyrosine 3-monooxygenase/tryptophan 5-monooxygenase activation protein,	4.98368e-05	42.1554	28284.9	9507245	7 (4 0 1 1 1)
brain glycogen phosphorylase [Homo sapiens]	0.00072275	40.1578	96634.7	21361370	5 (2 1 2 0 0)
isocitrate dehydrogenase (NADP+) [Homo sapiens]	2.15918e-08	40.1493	50915.9	872121	4 (4 0 0 0 0)
NADH dehydrogenase (ubiquinone) 1 beta subcomplex, 10, 22kDa [Homo sapi	7.15394e-06	40.1262	20763.2	4758774	4 (4 0 0 0 0)
cytochrome c oxidase subunit Vb precursor [Homo sapiens]	0.0078807	40.1149	13686.9	17017988	6 (4 0 0 2 0)
H3 histone, family 3A [Homo sapiens]	0.00330735	40.1132	15318.5	4504279	5 (4 0 0 1 0)
guanine nucleotide-binding protein, beta-1 subunit [Mus musculus]	8.71749e-05	40.1128	37353	6680045	4 (4 0 0 0 0)
ATPase, H+ transporting, lysosomal, V0 subunit c [Homo sapiens]	2.86711e-06	38.2022	15725.5	4502313	5 (4 1 0 0 0)
mysoin heavy chain 12 [Homo sapiens]	4.03021e-06	38.1375	215196	1770741	6 (2 0 1 3 0)
adenylyl cyclase-associated protein 2 [Homo sapiens]	3.02754e-10	38.127	52790.9	5453593	4 (3 1 0 0 0)
GTBP-ALT [Homo sapiens]	0.00717363	38.1238	121012	2662381	6 (3 0 2 0 1)
phosphofructokinase, platelet [Homo sapiens]	1.45481e-09	36.2214	85541.6	11321601	6 (3 0 0 0 3)
glyceraldehyde-3-phosphate dehydrogenase [Homo sapiens]	8.32613e-09	36.1932	36030.4	7669492	5 (2 1 1 0 1)
microtubule-associated protein, RP/EB family, member 2 [Homo sapiens]	1.74565e-06	36.148	37008.2	10346135	4 (3 0 1 0 0)
SUCA_HUMAN Succinyl-CoA ligase [GDP-forming] subunit alpha, mitochondrial pre	0.000153511	36.0875	35025.2	20141765	5 (3 2 0 0 0)
novel protein similar to H.sapiens CAMSAP1, calmodulin regulated spect	0.000949519	36.0797	173792	148725837	6 (2 0 2 0 2)
neural cell adhesion molecule 1 isoform 3 [Homo sapiens]	2.8242e-06	34.1947	83718	115529478	5 (3 1 1 0 0)
JN0908 H+-exporting ATPase (EC 3.6.3.6) chain D, vacuolar - human	0.0059189	34.115	31683.9	542837	5 (2 0 1 2 0)
KIAA0325 protein [Homo sapiens]	0.00236362	34.0992	533404	71891782	4 (2 1 1 0 0)
serine/arginine repetitive matrix 1 [Homo sapiens]	0.0085626	34.0966	102274	42542379	9 (1 1 3 2 2)
KIAA0973 protein [Homo sapiens]	0.0016239	34.083	172164	4589590	6 (2 2 0 2 0)
ubiquinol-cytochrome c reductase core protein I [Homo sapiens]	0.000389896	32.1424	52612.5	46593007	4 (3 0 0 0 1)
unknown [Homo sapiens]	2.69982e-05	32.1239	268547	62988842	5 (1 1 2 0 1)
R Chain R, Twinning In Crystals Of Human Skeletal Muscle D- Glyceraldehyde-3-Pho	0.000118991	32.0977	35853.3	230867	4 (1 2 1 0 0)
SPTAN1 protein [Homo sapiens]	0.00259883	32.0592	282106	31565122	5 (2 2 1 0 0)
limbic system-associated membrane protein [Homo sapiens]	2.64321e-07	30.2289	37370.2	45594240	3 (3 0 0 0 0)
histone H2B [Homo sapiens]	4.83366e-10	30.1973	13927.6	1568557	5 (3 0 1 1 0)
CD59 antigen p18-20 [Homo sapiens]	1.57211e-07	30.1788	14167.8	10835165	3 (3 0 0 0 0)
microsomal glutathione S-transferase 3 [Homo sapiens]	2.79382e-06	30.1478	16505.6	4758714	5 (4 0 1 0 0)
sarco/endoplasmic reticulum Ca2+ -ATPase [Homo sapiens]	5.4026e-07	30.1467	112442	3021396	3 (3 0 0 0 0)
tubulin, alpha 4 [Mus musculus]	9.31609e-07	30.141	49892.4	6678467	8 (8 0 0 0 0)
guanine nucleotide binding protein (G protein), alpha inhibiting activi	1.12751e-07	30.1362	40425.1	4504041	4 (1 1 2 0 0)
prohibitin 2 [Homo sapiens]	0.000923875	30.1134	33275.9	6005854	4 (4 0 0 0 0)
creatine kinase, mitochondrial 1B precursor [Homo sapiens]	0.00015931	30.1053	47007.3	10334859	3 (3 0 0 0 0)
COX41_PANTR Cytochrome c oxidase subunit 4 isoform 1 (Cytochrome c oxidase sub	5.79028e-07	30.092	16851.6	5921895	3 (3 0 0 0 0)
clathrin heavy chain 1 [Homo sapiens]	4.48097e-05	30.0895	191492	4758012	4 (4 0 0 0 0)
excision repair cross-complementing rodent repair deficiency, complemen	0.000116788	30.0864	168311	4557565	4 (1 1 2 0 0)
guanine nucleotide-binding protein, beta-3 subunit [Homo sapiens]	0.00287704	30.082	37196.9	4504053	5 (3 1 1 0 0)
novel protein similar to mouse and humanIQ motif containing with AAA d	0.00293663	30.0666	75813.5	148880027	4 (2 0 1 1 0)
heat shock 90kDa protein 1, beta [Homo sapiens]	1.34892e-11	28.2477	83212.2	20149594	6 (2 2 1 0 1)
75 kDa subunit NADH dehydrogenase precursor [Homo sapiens]	3.95768e-07	28.1729	79522.6	38079	4 (2 0 1 0 1)
phosphatidylinositol-4-phosphate 5-kinase type II beta [Homo sapiens]	6.57137e-08	28.1704	47347.8	4505819	4 (2 0 0 2 0)
SYN2_HUMAN Synapsin-2 (Synapsin II)	1.24382e-05	28.1583	62928.8	6686022	3 (2 1 0 0 0)
H4 histone family, member A [Homo sapiens]	0.000462653	28.1397	11360.4	4504301	4 (3 1 0 0 0)
S38532 protein 14-3-3 eta chain - human	0.000480752	28.1351	28172	481365	3 (2 1 0 0 0)
neuronal growth regulator 1 [Homo sapiens]	0.000437668	28.1141	38694.3	66346706	3 (2 1 0 0 0)
unnamed protein product [Homo sapiens]	0.00691769	28.1063	80772.9	10436296	3 (2 1 0 0 0)
de-ubiquitinase [Homo sapiens]	7.87805e-05	28.0957	95683.4	1122278	3 (2 1 0 0 0)
melanoma antigen family E, 2 [Homo sapiens]	0.00550389	28.0896	60339.4	20162570	4 (3 1 0 0 0)
PR domain containing 1, with ZNF domain isoform 1 [Homo sapiens]	0.00484691	28.0821	87935.1	4557363	4 (1 1 1 1 0)
tetratricopeptide repeat domain 22 [Homo sapiens]	0.0023147	28.0708	41716.1	8923573	3 (2 1 0 0 0)
reticulon 1 isoform A [Homo sapiens]	0.00299658	28.0667	83566.2	10863935	5 (3 1 0 0 1)
tubulin, beta, 2 [Homo sapiens]	3.41955e-10	26.1927	49799	5174735	20 (8 8 4 0 0)
TAFII140 protein [Homo sapiens]	0.00127302	26.1782	81621.6	13374079	11 (1 5 2 2 1)
heterogeneous nuclear ribonucleoprotein A2/B1 isoform A2 [Homo sapiens]	1.90912e-05	26.1762	35983.8	4504447	3 (2 0 1 0 0)
glutamate transporter [Homo sapiens]	2.27268e-05	26.1511	61664.6	488752	8 (3 1 1 2 1)
gelsolin isoform a precursor [Homo sapiens]	0.00590617	26.1272	85644.2	4504165	3 (2 0 1 0 0)
solute carrier family 25 member 3 isoform a precursor [Homo sapiens]	0.00456012	26.1089	40068.8	6031192	3 (2 0 1 0 0)
IQGA2_HUMAN Ras GTPase-activating-like protein IQGAP2	0.00700498	26.0844	180500	13959394	4 (1 1 1 0 1)
heterogeneous nuclear ribonucleoprotein H2 [Homo sapiens]	0.00768704	26.0838	49232.3	9624998	7 (1 3 2 0 1)
polycystin-1L1 [Homo sapiens]	0.0024419	26.0832	315231	19923084	4 (1 1 1 0 1)
similar to t-complex 1; T-complex locus TCP-1; t-complex 1 (a murine tcp	0.00580365	26.0809	19812.7	51094756	10 (3 4 1 0 2)
heavy neurofilament subunit [Homo sapiens]	0.000620172	26.0737	111713	1841430	5 (1 0 1 2 1)
KIAA1389 protein [Homo sapiens]	0.00853985	26.0705	167428	7243159	5 (1 1 2 1 0)
dynamin 2 isoform 1 [Homo sapiens]	0.00750366	24.1338	98003.3	56549121	5 (1 2 1 0 1)
pyruvate kinase 3 isoform 1 [Homo sapiens]	0.00725501	24.1283	57900.2	33286418	3 (2 0 0 1 0)
Ca2+-dependent activator protein for secretion 2 isoform a [Homo sapi	0.000943027	24.1243	147641	148839294	3 (1 1 1 0 0)
FBN2_HUMAN Fibrillin-2 precursor	0.00264247	24.0892	314130	1345961	3 (1 1 1 0 0)
myosin VI [Homo sapiens]	0.00181679	24.084	145955	9280816	4 (0 3 0 0 1)
plexin C1 [Homo sapiens]	0.00317301	24.0825	175630	5032223	3 (2 0 0 1 0)
adaptor protein complex AP-2, mu1 [Mus musculus]	0.00998731	24.0769	49623.1	6753074	3 (1 1 1 0 0)
MGR6_HUMAN Metabotropic glutamate receptor 6 precursor (mGluR6)	0.00817019	24.0723	95376	3024134	4 (0 2 1 0 1)
KIAA0864 protein [Homo sapiens]	6.76868e-05	24.0691	158314	20521680	4 (1 1 0 1 1)
unnamed protein product [Homo sapiens]	0.00330866	24.0584	60199.7	7023586	3 (1 1 1 0 0)
kinesin family member 15 [Homo sapiens]	0.00828285	24.0517	160060	9910266	3 (2 0 0 1 0)
TBB4Q_HUMAN Tubulin beta-4q chain	1.7703e-08	22.1642	48403.5	12643363	7 (0 5 0 1 1)
heat shock 70kDa protein 9B precursor [Homo sapiens]	8.16644e-05	22.1547	73634.8	24234688	3 (2 0 0 0 1)
KIAA0842 protein [Homo sapiens]	0.00930727	22.1404	112780	4240173	6 (0 3 0 1 2)
collapsin response mediator protein 1 isoform 2 [Homo sapiens]	0.000237729	22.1192	62144.8	4503051	3 (2 0 0 0 1)
hypothetical protein [Homo sapiens]	0.00243212	22.1029	221036	21732892	3 (1 1 0 1 0)
NADH dehydrogenase (ubiquinone) 1 alpha subcomplex, 8, 19kDa [Homo sapi	0.00012568	22.0869	20092.1	7657369	3 (1 0 2 0 0)
polyprotein [Human rhinovirus 15]	0.00194486	22.0829	242667	95102502	3 (0 2 1 0 0)
KIAA1970 protein [Homo sapiens]	0.00163382	22.0676	58265.5	18916837	3 (1 1 0 1 0)
Thy-1 cell surface antigen [Homo sapiens]	5.54841e-08	20.1748	17923.3	19923362	7 (6 1 0 0 0)
AT2B4_HUMAN Plasma membrane calcium-transporting ATPase 4 (PMCA4) (Plasma mem	0.000105731	20.1736	137833	14286105	3 (3 0 0 0 0)
RAB3A, member RAS oncogene family [Homo sapiens]	5.61376e-09	20.1663	24968.1	4506367	3 (3 0 0 0 0)
histone H2A [Homo sapiens]	4.36767e-06	20.1604	13986.8	28195394	3 (3 0 0 0 0)
A45036 single-stranded-DNA-binding protein Pur alpha - human [MA	1.23743e-07	20.1578	34948.5	346338	3 (3 0 0 0 0)
phosphoglycerate mutase 1 (brain) [Homo sapiens]	5.77721e-09	20.1507	28785.8	4505753	2 (2 0 0 0 0)
aconitase 2 precursor [Homo sapiens]	1.07635e-07	20.1493	85372	4501867	2 (2 0 0 0 0)
K1045_HUMAN Protein KIAA1045	2.14273e-06	20.1386	45163.4	73621116	2 (2 0 0 0 0)
Cytochrome c oxidase subunit Va [Homo sapiens]	0.00125639	20.1385	16751.7	18999392	3 (3 0 0 0 0)
protein kinase C, theta [Homo sapiens]	2.28913e-06	20.1287	81810.8	5453976	2 (2 0 0 0 0)
phosphoglycerate mutase 2 (muscle) [Homo sapiens] [M	6.02552e-06	20.123	28201.4	51094513	2 (2 0 0 0 0)
CENG3_HUMAN Centaurin-gamma 3 (ARF-GAP with GTP-binding protein-like, ankyrin	7.70604e-06	20.1192	94985.4	97535922	2 (2 0 0 0 0)
ATPase, H+ transporting, lysosomal, V0 subunit d1 [Homo sapiens]	0.000183325	20.1161	40303.3	19913432	2 (2 0 0 0 0)
calcium/calmodulin-dependent protein kinase IIB isoform 2 [Homo sapien	5.92688e-08	20.1105	60348.7	26051206	4 (3 1 0 0 0)
beta actin [Homo sapiens]	0.00321503	20.1085	41709.7	4501885	2 (2 0 0 0 0)
tyrosine 3/tryptophan 5 -monooxygenase activation protein, zeta polypep	2.409e-06	20.1064	27727.7	4507953	3 (3 0 0 0 0)
DREB_HUMAN Drebrin (Developmentally-regulated brain protein)	9.20826e-06	20.1053	71381.6	2498313	2 (2 0 0 0 0)
KIAA1009 protein [Homo sapiens]	0.00658268	20.1023	154950	40789020	4 (1 0 0 2 1)
EHD3_HUMAN EH domain-containing protein 3	0.000401547	20.0993	61857.2	18203332	2 (2 0 0 0 0)
AJHUQ glutamate-ammonia ligase (EC 6.3.1.2) - human	0.00702233	20.0992	42138.4	25754242	2 (2 0 0 0 0)
claudin 11 [Homo sapiens]	0.00528683	20.0885	21978.4	10938016	3 (3 0 0 0 0)
A Chain A, Human Vimentin Coil 2b Fragment (Cys2)	0.00408357	20.0879	9901.82	20149836	2 (2 0 0 0 0)
KIAA1176 protein [Homo sapiens]	0.00156987	20.0865	121738	6330233	2 (2 0 0 0 0)
axonal transporter of synaptic vesicles [Homo sapiens]	0.00356862	20.0862	190963	1212917	3 (1 1 0 0 1)
glucose phosphate isomerase [Homo sapiens]	0.00355188	20.0859	63107.3	18201905	2 (2 0 0 0 0)
FLJ00136 protein [Homo sapiens]	0.00465929	20.0752	90669.8	18676478	2 (2 0 0 0 0)
unnamed protein product [Homo sapiens]	0.00247024	20.0727	62757.2	10433552	2 (2 0 0 0 0)
H1 histone family, member 0 [Homo sapiens]	0.00057285	20.071	20850.2	4885371	2 (2 0 0 0 0)
coiled-coil-helix-coiled-coil-helix domain containing 3 [Homo sapiens]	0.00301968	20.071	26136.2	8923390	3 (1 1 0 0 1)
calcium/calmodulin-dependent protein kinase II gamma isoform 1 [Mus mu	0.0019483	20.071	59569.4	75991700	5 (0 1 0 3 1)
fas ligand [Homo sapiens]	0.00468179	20.071	31464.1	4557329	4 (0 1 1 1 1)
RHG05_HUMAN Rho GTPase-activating protein 5 (p190-B)	0.00153265	20.0655	171460	46397678	2 (2 0 0 0 0)
EF-hand calcium binding domain 5 [Homo sapiens] [	0.00795741	20.0578	173309	90652855	3 (1 1 0 0 1)
aquaporin 4 isoform a [Homo sapiens]	1.47498e-07	18.2131	34806.9	4502181	2 (1 1 0 0 0)
growth associated protein 43 [Homo sapiens]	0.000546302	18.1789	24787.9	4503911	2 (1 1 0 0 0)
DCLK1_HUMAN Serine/threonine-protein kinase DCLK1 (Doublecortin-like and CAM k	1.52708e-06	18.1588	82173	6225242	2 (1 1 0 0 0)
gag protein [Human immunodeficiency virus 1]	0.00469041	18.1383	56077.8	56608713	5 (1 1 1 1 1)
unnamed protein product [Homo sapiens]	4.77743e-05	18.1344	40203.1	22760099	2 (1 1 0 0 0)
protein kinase C, beta isoform 2 [Homo sapiens]	2.23876e-05	18.1185	76962.2	20127450	2 (1 1 0 0 0)
enolase 2 [Homo sapiens]	0.00341761	18.1158	47239.1	5803011	2 (1 1 0 0 0)
calcium/calmodulin-dependent protein kinase II delta isoform 1 [Homo s	0.000594829	18.1111	54093.6	26667183	3 (2 1 0 0 0)
hypothetical protein DDBDRAFT_0167566 [Dictyostelium discoideum AX4]	0.00671496	18.1102	50433	66821635	3 (2 1 0 0 0)
hypothetical protein [Homo sapiens]	0.00858734	18.1085	180386	6807915	2 (1 1 0 0 0)
T17287 protein kinase (EC 2.7.1.37) akt3 short splice form - human	0.00810795	18.1083	53554.9	7512664	3 (1 0 1 0 1)
RAB1B, member RAS oncogene family [Homo sapiens]	1.73645e-05	18.107	22157.2	13569962	3 (0 1 1 1 0)
aquaporin 5 [Homo sapiens]	0.00228754	18.1031	41943	119578514	2 (1 1 0 0 0)
endothelin-converting enzyme, isoform ECE-1a [Homo sapiens]	0.00627005	18.0971	85753.9	1177448	2 (1 1 0 0 0)
ZN516_HUMAN Zinc finger protein 516	0.00588542	18.0947	124212	14548318	3 (0 1 1 1 0)
sorting nexin 1 isoform a [Homo sapiens]	0.0095005	18.0922	59033.2	23111034	3 (1 0 1 0 1)
neurogenic differentiation 6 [Homo sapiens]	0.00103451	18.0901	38680.3	27475985	8 (3 2 2 0 1)
KIAA0964 protein [Homo sapiens]	0.000654633	18.0862	108477	40789001	2 (1 1 0 0 0)
dachsous 2 isoform 1 [Homo sapiens]	0.00594184	18.0845	322032	47059046	2 (1 1 0 0 0)
nef protein [Human immunodeficiency virus 1]	0.0084909	18.0792	23622.5	94539032	3 (1 2 0 0 0)
pyridoxal kinase [Homo sapiens]	3.44776e-05	18.0781	35079.9	4505701	2 (1 1 0 0 0)
K1671_HUMAN Protein KIAA1671	0.00813674	18.0718	196589	147647261	2 (1 1 0 0 0)
KIAA0160 [Homo sapiens]	0.00198074	18.0683	89907.2	1813429	3 (0 2 0 0 1)
coatomer protein complex, subunit beta 2 (beta prime) [Homo sapiens]	0.00719979	18.0643	102422	4758032	3 (0 1 1 1 0)
B3A2_HUMAN Anion exchange protein 2 (Non-erythroid band 3-like protein) (AE2	0.00166796	18.0633	136924	85687559	3 (1 2 0 0 0)
c-myc binding protein [Homo sapiens]	0.00239329	18.0592	18629.7	1731809	3 (1 2 0 0 0)
hypothetical protein ( (L11645) alpha-tubulin [Homo sapiens] ) [Neuros	9.27211e-06	16.15	10326.7	85091443	2 (1 0 1 0 0)
vacuolar H+ATPase B2 [Homo sapiens]	0.00404882	16.1422	56465	19913428	2 (1 0 1 0 0)
lanthionine synthetase C-like protein 1 [Homo sapiens]	7.89132e-06	16.1194	45253.6	5174445	2 (1 0 1 0 0)
inhibitory glycine receptor [Homo sapiens]	0.00962222	16.1117	51462.2	31851	2 (1 0 1 0 0)
unnamed protein product [Homo sapiens]	0.00565161	16.1085	52406.5	21757045	4 (1 0 0 0 3)
H2A histone family, member A [Homo sapiens]	0.00100521	16.1067	14127	10645195	3 (2 0 1 0 0)
KIAA1905 protein [Homo sapiens]	0.00370217	16.0969	69963.9	15620869	2 (1 0 1 0 0)
KIAA1384 protein [Homo sapiens]	0.0051701	16.0965	73196.9	7243149	3 (1 0 0 1 1)
KIAA1878 protein [Homo sapiens]	0.000725481	16.0905	48892	14017973	3 (1 0 0 1 1)
envelope glycoprotein [Human immunodeficiency virus 1]	0.00119302	16.0893	96698.8	26518644	2 (1 0 1 0 0)
unnamed protein product [Homo sapiens]	0.00638904	16.0878	102321	14042328	3 (0 2 1 0 0)
KIAA0350 protein [Homo sapiens]	0.00775649	16.0848	118610	20521011	2 (0 2 0 0 0)
hypothetical protein [Homo sapiens]	0.00558877	16.0818	47573.8	51476446	2 (0 2 0 0 0)
cadherin-9 [Homo sapiens]	0.00952321	16.0776	88646.1	6483296	3 (0 1 1 0 1)
guanine nucleotide binding protein (G protein), gamma 3 subunit [Mus mu	0.00159656	16.0775	8299.16	6754022	2 (1 0 1 0 0)
unnamed protein product [Homo sapiens]	0.00873211	16.0754	25215.2	28193116	2 (1 0 1 0 0)
KIAA0796 protein [Homo sapiens]	0.00669394	16.0754	216105	20521662	2 (1 0 1 0 0)
unnamed protein product [Homo sapiens]	0.00406785	16.0704	60845.8	16553186	2 (1 0 1 0 0)
PMP22 claudin domain-containing protein [Homo sapiens]	0.00404286	16.069	25811.1	62000698	3 (1 0 0 1 1)
M74161 inositol polyphosphate 5-phos	0.000112623	16.066	37227.3	5668810	2 (1 0 1 0 0)
Rho-associated, coiled-coil containing protein kinase 1 [Homo sapiens]	0.000669558	16.0654	158075	4885583	3 (0 1 1 0 1)
immunoglobulin heavy chain variable region [Homo sapiens]	0.000937383	16.0623	10570.1	112702555	2 (1 0 1 0 0)
ribosomal protein L19 [Homo sapiens]	0.00826998	16.0615	23451.3	4506609	3 (1 0 0 1 1)
thioesterase superfamily member 5 [Homo sapiens]	0.00576939	16.0551	27645	32698978	2 (1 0 1 0 0)
Checkpoint protein, involved in the activation of the DNA damage and me	0.00468391	16.053	75678.9	6321021	3 (1 0 0 1 1)
cholinergic receptor, muscarinic 5 [Homo sapiens]	0.00350431	16.052	60035.1	7108336	2 (1 0 1 0 0)
similar to GenBank Accession Number AF183413 dolichyl-phosphate beta-glu	0.00791308	16.047	21652.3	29840893	2 (1 0 1 0 0)
huntingtin [Homo sapiens]	0.00708967	16.046	347638	90903231	3 (1 0 0 1 1)
One of six ATPases of the 19S regulatory particle of the 26S proteasome	0.00807968	16.0436	48797.5	6320197	2 (1 0 1 0 0)
large subunit GTPase 1 homolog [Homo sapiens]	0.00115449	14.114	75179.4	14149720	3 (1 0 0 0 2)
A Chain A, Crystal Structure Of Human Granzyme B	0.00321137	14.0948	25495.1	13096242	2 (1 0 0 1 0)
protogenin [Homo sapiens]	0.000297625	14.0939	126996	83281200	2 (1 0 0 1 0)
hemochromatosis splice variant 838-2283del [Homo sapiens]	0.000503003	14.0892	12225	11094319	2 (0 1 1 0 0)
LRRC6 protein [Homo sapiens]	0.00061253	14.0881	47728.7	71051963	2 (1 0 0 1 0)
leucine rich repeat containing 8 family, member B [Homo sapiens]	0.00276797	14.0856	92330.5	21245134	2 (1 0 0 1 0)
FRAS1-related extracellular matrix protein 2 precursor [Homo sapiens]	0.00765594	14.0803	350936	79749430	3 (0 0 1 2 0)
cytochrome P450, family 24 precursor [Homo sapiens]	0.00210505	14.0783	58837.6	55770850	2 (1 0 0 1 0)
unnamed protein product [Homo sapiens]	0.0073809	14.0775	102904	34533419	2 (1 0 0 1 0)
unnamed protein product [Homo sapiens]	0.00291679	14.0753	71310.6	10434153	2 (0 1 1 0 0)
unnamed protein product [Homo sapiens]	0.00970304	14.0687	52369.9	21755689	2 (1 0 0 1 0)
KIAA1568 protein [Homo sapiens]	0.00624785	14.0675	151333	10047201	3 (0 0 2 0 1)
gp120 [Human immunodeficiency virus 1]	0.00221163	14.0669	37395.9	28172579	2 (0 1 1 0 0)
NR1D2_HUMAN Orphan nuclear receptor NR1D2 (Rev-erb-beta) (EAR-1R) (Orphan nucl	0.00842568	14.0666	64601.3	6166580	2 (0 1 1 0 0)
hCG1815425, isoform CRA_b [Homo sapiens]	0.00306231	14.0635	5004.45	119575698	3 (0 0 2 0 1)
hypothetical protein [Homo sapiens]	0.00820575	14.0617	158198	50949604	2 (0 1 1 0 0)
hypothetical protein [Homo sapiens]	0.00369951	14.0579	251313	21740221	2 (1 0 0 1 0)
GTPase activating protein and VPS9 domains 1 [Homo sapiens]	0.00959078	14.0574	141001	55666467	2 (1 0 0 1 0)
unnamed protein product [Homo sapiens]	0.00434234	14.0558	30859.2	10434471	2 (0 1 1 0 0)
phosphorylase kinase, gamma 2 (testis) [Homo sapiens]	0.00697876	14.0528	46412.8	4505785	3 (1 0 0 2 0)
NADH dehydrogenase (ubiquinone) 1 beta subcomplex, 7, 18kDa [Homo sapi	4.89412e-07	12.1795	16391.3	10764847	2 (1 0 0 0 1)
F-box and WD repeat domain containing 11 isoform A [Homo sapiens]	0.00358102	12.1441	58385.6	48928048	2 (0 1 0 1 0)
single-stranded DNA binding protein 1 [Homo sapiens]	3.84874e-05	12.1373	17249	4507231	2 (1 0 0 0 1)
A Chain A, Crystal Structure Of Caenorhabditis Elegans Mg-Atp Actin Complexed	0.00102376	12.1319	41637.7	14278147	2 (0 1 0 1 0)
hypothetical protein LOC199920 [Homo sapiens]	0.00955176	12.1139	82119.1	52694678	2 (0 1 0 1 0)
phospholipase B1 [Homo sapiens]	0.00620974	12.1128	162955	76096366	6 (0 3 0 3 0)
STX1B_HUMAN Syntaxin-1B1 (Syntaxin 1B)	0.00176155	12.1065	33410.1	2501085	3 (1 1 0 0 1)
leucine-rich repeat LGI family, member 3 [Homo sapiens]	0.00105126	12.0999	61665.6	21281681	2 (1 0 0 0 1)
mitogen-activated protein kinase kinase 7 [Homo sapiens]	0.00706263	12.097	47454.6	21735544	4 (1 1 0 1 1)
UDP-N-acetyl-alpha-D-galactosamine:polypeptide N-acetylgalactosaminyltr	0.000573121	12.0933	68973.8	28268676	2 (0 1 0 1 0)
protocadherin 9 isoform 2 precursor [Homo sapiens]	0.00362631	12.0871	132170	9966883	2 (0 0 2 0 0)
hypothetical protein LOC91828 [Homo sapiens]	0.00438041	12.0864	79846.3	117938266	3 (0 0 2 0 1)
AF100772_1 tenascin-M1 [Homo sapiens]	0.00418328	12.0835	304700	6165845	2 (0 1 0 1 0)
cytochrome c-1 [Homo sapiens]	0.00495256	12.082	35367	21359867	2 (1 0 0 0 1)
L1 protein [Human papillomavirus type 106]	0.00707938	12.0809	63228.7	71726717	2 (0 1 0 1 0)
reverse transcriptase [Human immunodeficiency virus 1]	0.00375241	12.079	41094.4	42592266	2 (1 0 0 0 1)
GPR158-like 1 [Homo sapiens]	0.00373364	12.0745	257200	93352554	2 (0 1 0 1 0)
KIAA1636 protein [Homo sapiens]	0.000353955	12.0742	205958	29421204	2 (0 1 0 1 0)
septin 5 [Homo sapiens]	0.00695577	12.0714	42749.7	9945439	2 (0 1 0 1 0)
solute carrier family 9, member 11 [Homo sapiens]	0.00809721	12.0692	128900	30425472	2 (1 0 0 0 1)
hypothetical protein LOC79871 [Homo sapiens]	0.00828181	12.0687	69405.8	13376202	3 (1 0 1 0 1)
TXK tyrosine kinase [Homo sapiens]	0.0074162	12.0681	61218.8	148596974	2 (1 0 0 0 1)
TENX_HUMAN Tenascin-X precursor (TN-X) (Hexabrachion-like protein)	0.00866297	12.0536	464166	9087217	2 (0 1 0 1 0)
hCG1779312, isoform CRA_b [Homo sapiens]	0.00672574	12.0488	447114	119585744	2 (1 0 0 0 1)
hypothetical protein [Homo sapiens]	0.000945313	12.0421	39913.7	4884374	2 (0 1 0 1 0)
tubulin, alpha 8 [Homo sapiens]	1.34671e-09	10.2444	50061.6	9507215	2 (2 0 0 0 0)
AF102846_1 N-ethylmaleimide-sensitive factor [Homo sapiens]	6.27232e-08	10.2286	82600.2	10257494	1 (1 0 0 0 0)
syntaxin 1B2 [Rattus norvegicus]	2.53013e-07	10.2038	33223.8	6981600	1 (1 0 0 0 0)
vesicle-associated membrane protein 2 (synaptobrevin 2) [Homo sapiens]	1.98444e-08	10.2023	12640.7	7657675	1 (1 0 0 0 0)
tubulin, alpha 1a [Mus musculus]	2.66158e-07	10.1958	49927.7	6678465	4 (4 0 0 0 0)
alpha SNAP [Homo sapiens]	9.72865e-06	10.1852	33225.3	3929617	1 (1 0 0 0 0)
isocitrate dehydrogenase 2 (NADP+), mitochondrial precursor [Homo sapi	2.36566e-06	10.1644	50876.9	28178832	1 (1 0 0 0 0)
RAB3C, member RAS oncogene family [Homo sapiens]	1.25648e-07	10.163	25935.6	19923985	1 (1 0 0 0 0)
ubiquinol-cytochrome c reductase binding protein [Homo sapiens]	1.13914e-09	10.1623	13522	5454152	1 (1 0 0 0 0)
cytochrome c oxidase subunit VIIa polypeptide 2 (liver) precursor [Homo	0.000610969	10.1613	9390.1	4502989	1 (1 0 0 0 0)
hCG1747788 [Homo sapiens]	0.000313023	10.1593	14554.8	119608911	11 (0 0 8 2 1)
solute carrier family 25 member 3 isoform b precursor [Homo sapiens]	5.90063e-07	10.1587	39932.7	4505775	2 (2 0 0 0 0)
guanine nucleotide binding protein, alpha activating polypeptide O [Ho	3.36353e-11	10.1581	40024.9	10567816	1 (1 0 0 0 0)
Tubulin, beta [Homo sapiens]	0.00432024	10.1511	49640	18088719	2 (1 1 0 0 0)
gag protein [Human immunodeficiency virus 1]	7.06861e-05	10.1504	55119.2	90812182	2 (1 0 1 0 0)
calcium/calmodulin-dependent protein kinase II gamma [Rattus norvegicu	1.86381e-05	10.1501	59001.1	19424316	2 (2 0 0 0 0)
NDUV2_HUMAN NADH dehydrogenase [ubiquinone] flavoprotein 2, mitochondrial pre	0.000135264	10.1494	27374	20455499	1 (1 0 0 0 0)
mitochondrial glutamate carrier 1 [Homo sapiens]	9.50027e-07	10.1465	34448.3	13375983	1 (1 0 0 0 0)
proteoglycan PG-M(V3) [Homo sapiens]	4.94864e-09	10.1455	74200.6	1008913	1 (1 0 0 0 0)
VP-1 capsid protein [Human poliovirus 1]	0.00965409	10.1361	10539.1	12231217	1 (1 0 0 0 0)
G01650 malate dehydrogenase (EC 1.1.1.37), cytosolic - human [M	0.00699177	10.1347	36392	7431153	1 (1 0 0 0 0)
A Chain A, Kinetic Analysis Of Product Inhibition In Human Manganese Superoxid	0.00145423	10.1309	22075.2	14488599	1 (1 0 0 0 0)
syntaxin binding protein 1 [Rattus norvegicus]	0.0021876	10.1307	67525.9	6981602	1 (1 0 0 0 0)
calmodulin [Homo sapiens]	6.01779e-06	10.1287	17152	825635	1 (1 0 0 0 0)
STK39_HUMAN STE20/SPS1-related proline-alanine-rich protein kinase (Ste-20-re	0.000737687	10.1249	59604.7	12643880	1 (1 0 0 0 0)
tubulin, beta 5 [Mus musculus]	0.000721498	10.1235	49639	7106439	5 (5 0 0 0 0)
SYN3_HUMAN Synapsin-3 (Synapsin III)	0.00122031	10.1217	63262.8	6707726	1 (1 0 0 0 0)
neurofilament-66; NF-66 [Homo sapiens]	0.00307824	10.1204	54875.2	994844	1 (1 0 0 0 0)
gag protein [Human immunodeficiency virus 1]	0.00176484	10.116	55769.5	124389770	1 (1 0 0 0 0)
Chain , The Alzheimer`s Disease Amyloid A4 Peptide (Residues 1-40)	0.000255146	10.1159	4327.15	1310912	2 (2 0 0 0 0)
visinin-like 1 [Mus musculus]	1.47891e-05	10.1155	22128	6755983	1 (1 0 0 0 0)
synapsin II, isoform CRA_b [Homo sapiens]	8.43668e-05	10.1133	53037.8	119584522	1 (1 0 0 0 0)
unactive progesterone receptor, 23 kD [Homo sapiens]	7.80039e-06	10.1131	18685.4	23308579	2 (2 0 0 0 0)
S31503 H+/K+-exchanging ATPase (EC 3.6.3.10) ATP1AL1 - human (fragment)	0.000323704	10.1129	10485.2	346261	3 (1 1 1 0 0)
immunoglobulin light chain variable region [Homo sapiens]	0.00127582	10.1128	11695.8	66096638	4 (2 1 0 1 0)
solute carrier family 25, member 5 [Homo sapiens]	1.78225e-05	10.1125	32874.2	4502099	1 (1 0 0 0 0)
pyruvate dehydrogenase (lipoamide) beta [Homo sapiens]	0.000383935	10.1114	39224.1	4505687	1 (1 0 0 0 0)
tyrosine 3/tryptophan 5 -monooxygenase activation protein, theta polype	8.34843e-06	10.111	27746.8	5803227	1 (1 0 0 0 0)
C-type lectin domain family 6, member A [Homo sapiens]	0.00520192	10.1106	20312.8	119609026	3 (2 0 1 0 0)
A42177 KRAB-domain-containing zinc finger protein ZNF45 - human (fragment)	0.00593002	10.1089	46301.6	284284	3 (0 2 0 0 1)
SHPS1_HUMAN Tyrosine-protein phosphatase non-receptor type substrate 1 precur	0.00230425	10.1066	54778.7	29427656	1 (1 0 0 0 0)
envelope protein [Human immunodeficiency virus 1] [	0.00382961	10.1051	95064.9	11124719	1 (1 0 0 0 0)
unnamed protein product [Homo sapiens]	0.00326328	10.1039	14984.2	10439579	1 (1 0 0 0 0)
Chain , Human Complement Regulatory Protein Cd59 (Extracellular Region, Resid	0.000152448	10.103	8080.61	515118	4 (4 0 0 0 0)
septin 8 isoform a [Homo sapiens]	0.00142744	10.1023	55721.1	149363689	1 (1 0 0 0 0)
orf RF2 [Human herpesvirus 6]	0.00617023	10.1019	45565	235437	1 (1 0 0 0 0)
synaptosomal-associated protein, 25kDa [Homo sapiens]	0.000902185	10.1016	10676	24740601	1 (1 0 0 0 0)
Dynamin 1 [Homo sapiens]	5.5333e-05	10.1008	96000.3	71052112	1 (1 0 0 0 0)
nucleophosmin/nucleoplasmin 3 [Homo sapiens]	0.00775649	10.0983	19331.4	6857818	1 (1 0 0 0 0)
tubulin, alpha-like 3 [Homo sapiens]	0.00483757	10.0976	49875.8	119606853	3 (1 1 1 0 0)
hypothetical protein LOC388407 [Homo sapiens]	0.0058355	10.0974	25361.8	44662807	1 (1 0 0 0 0)
ras-related GTP-binding protein RAB10 [Homo sapiens]	6.46998e-05	10.0967	22454.6	33695095	1 (1 0 0 0 0)
protein kinase C, theta [Homo sapiens]	0.00274657	10.0967	55350.3	55957458	1 (1 0 0 0 0)
heterogeneous nuclear ribonucleoprotein A3 [Homo sapiens]	0.00905952	10.0954	39570.5	34740329	1 (1 0 0 0 0)
SLC27A3 protein [Homo sapiens]	0.00688404	10.0954	43727.5	38197058	1 (1 0 0 0 0)
pol protein [Human immunodeficiency virus 1]	2.12443e-05	10.0953	57071.5	116277892	1 (1 0 0 0 0)
FUT4_HUMAN Alpha-(1,3)-fucosyltransferase (Galactoside 3-L-fucosyltransferase)	0.000563655	10.0946	45541.1	1730133	1 (1 0 0 0 0)
envelope glycoprotein [Human immunodeficiency virus type 1]	0.00732019	10.0937	12521.8	4457087	1 (1 0 0 0 0)
unnamed protein product [Homo sapiens]	0.00528868	10.0934	55561.1	10437204	2 (0 0 1 1 0)
glutamine rich 2 [Homo sapiens]	2.39361e-06	10.0929	180714	14149793	1 (1 0 0 0 0)
gag protein [Human immunodeficiency virus 1]	0.00121191	10.0906	16719.5	50981493	1 (1 0 0 0 0)
immunoglobulin heavy chain variable region [Homo sapiens]	0.000519708	10.0901	10718.4	112701165	1 (1 0 0 0 0)
unnamed protein product [Homo sapiens]	0.00476926	10.0895	20708.4	11138040	2 (2 0 0 0 0)
unnamed protein product [Homo sapiens]	0.00206593	10.0876	72593.7	14042790	2 (1 0 0 0 1)
protease [Human immunodeficiency virus 1]	0.0080758	10.0874	10417.6	73623634	1 (1 0 0 0 0)
contactin associated protein 1 [Homo sapiens]	4.90211e-05	10.0869	156167	4505463	1 (1 0 0 0 0)
egf-like module containing, mucin-like, hormone receptor-like 3, isofor	9.0281e-05	10.0861	67812.2	119604844	1 (1 0 0 0 0)
capsid protein [Human coxsackievirus A9]	0.000941245	10.0845	12089	51556966	1 (1 0 0 0 0)
FLJ16165 protein [Homo sapiens]	0.00752294	10.0841	50435.4	51972210	1 (1 0 0 0 0)
X Chain X, Crystal Structure Of B. Anthracis Protective Antigen Complexed With	0.00987958	10.083	82623.9	51247574	3 (0 1 0 1 1)
ribosomal protein S6 kinase, 90kDa, polypeptide 3 [Homo sapiens]	0.00315889	10.0818	83683.1	4759050	1 (1 0 0 0 0)
A47546 triacylglycerol lipase (EC 3.1.1.3), hormone-sensitive - human	0.00391514	10.0816	85426.9	1082874	2 (0 1 0 0 1)
similar to zinc finger protein 709 [Homo sapiens]	0.00863325	10.0803	66633.2	122937201	1 (1 0 0 0 0)
envelope glycoprotein precursor gp160 [Human immunodeficiency virus 1]	0.00797488	10.0796	98728.3	71794592	1 (1 0 0 0 0)
unnamed protein product [Homo sapiens]	0.00201897	10.0796	29723.7	22760771	1 (1 0 0 0 0)
N-ethylmaleimide-sensitive factor [Homo sapiens] [M	0.000349192	10.0795	82542.2	21040484	1 (1 0 0 0 0)
immunoglobulin G1 heavy chain varible region [Homo sapiens]	0.00940427	10.0794	23963.9	130381797	1 (1 0 0 0 0)
transmembrane and coiled-coil domains 5 [Homo sapiens]	0.00322881	10.0788	34152.8	34303932	1 (1 0 0 0 0)
matrix metalloproteinase 7 preproprotein [Homo sapiens]	0.00165637	10.0787	29657.9	4505219	1 (1 0 0 0 0)
KCTD3 protein [Homo sapiens]	0.00113917	10.0786	80862.3	33871013	1 (1 0 0 0 0)
envelope glycoprotein [Human immunodeficiency virus 1]	0.00186892	10.0779	14217.4	93009571	1 (1 0 0 0 0)
POLG_EC05N Genome polyprotein [Contains: Capsid protein VP4 (P1A) (Virion pro	0.00491515	10.0772	245081	17369962	1 (1 0 0 0 0)
chromosome 10 open reading frame 114 [Homo sapiens]	0.00725816	10.077	23508	119606576	1 (1 0 0 0 0)
dapper 1 isoform 1 [Homo sapiens]	0.00528262	10.077	90118.6	24158478	3 (0 0 1 2 0)
elongin C [Homo sapiens]	0.00354375	10.0761	12465	5032161	1 (1 0 0 0 0)
pol protein [Human immunodeficiency virus 1]	0.00361473	10.0759	11781.4	46369749	1 (1 0 0 0 0)
envelope glycoprotein [Human immunodeficiency virus 1]	0.00835256	10.0758	19624.7	47499810	1 (1 0 0 0 0)
olfactory receptor, family 1, subfamily M, member 1 [Homo sapiens]	0.000340233	10.0756	34816.2	52218828	3 (1 1 1 0 0)
AF391859_1 VP1 [Human echovirus 30]	0.00742684	10.0751	16049.9	20530356	1 (1 0 0 0 0)
apoptosis-inducing factor (AIF)-like mitchondrion-associated inducer o	0.00633652	10.0727	40501.3	14318424	3 (1 1 1 0 0)
pol protein [Human immunodeficiency virus 1]	0.00662151	10.0723	67022.2	19069743	1 (1 0 0 0 0)
neuromedin U [Homo sapiens]	0.000502303	10.0719	13610.8	28865706	1 (1 0 0 0 0)
thyroglobulin [Homo sapiens]	0.00183515	10.0708	46609.2	1359884	1 (1 0 0 0 0)
immunoglobulin heavy chain VHDJ region [Homo sapiens]	0.000994278	10.0705	13057.3	21668636	1 (1 0 0 0 0)
envelope glycoprotein [Human immunodeficiency virus 1]	0.00223659	10.07	12635.7	56125506	1 (1 0 0 0 0)
fibrinogen, alpha polypeptide isoform alpha-E preproprotein [Homo sapie	0.000104862	10.0698	94914.3	4503689	1 (1 0 0 0 0)
phosphatase and tensin homolog (mutated in multiple advanced cancer	0.00774771	10.0696	46798.2	49227345	3 (1 0 0 2 0)
pol protein [Human immunodeficiency virus 1]	0.00477487	10.0691	18869.9	37701610	1 (1 0 0 0 0)
envelope glycoprotein [Human immunodeficiency virus 2]	0.00364035	10.0685	9057.76	3582560	1 (1 0 0 0 0)
envelope glycoprotein [Human immunodeficiency virus 1]	0.00635299	10.0684	37779.8	27762912	1 (1 0 0 0 0)
envelope glycoprotein [Human immunodeficiency virus 1]	0.00873586	10.0683	12516.6	87246872	1 (1 0 0 0 0)
unnamed protein product [Homo sapiens]	0.000592401	10.0676	13926.2	34535018	1 (1 0 0 0 0)
poly(A) binding protein interacting protein 2, isoform CRA_b [Homo sapi	0.0013847	10.0669	12824.5	119582513	1 (1 0 0 0 0)
AF456516_1 pol protein [Human immunodeficiency virus type 1]	0.00961452	10.0669	48018.8	27449316	1 (1 0 0 0 0)
organic anion transpoter 4 like protein [Homo sapiens]	0.000399917	10.0667	58690.8	15718383	1 (1 0 0 0 0)
zinc finger protein 367 [Homo sapiens]	0.00583253	10.0661	38387.2	24233572	1 (1 0 0 0 0)
reverse transcriptase [Human immunodeficiency virus 1]	0.00824806	10.0656	22563.8	67080330	1 (1 0 0 0 0)
RNA-dependent RNA polymerase [Human picobirnavirus]	0.00813516	10.0655	60935.6	66391748	1 (1 0 0 0 0)
hCG2010218 [Homo sapiens]	5.4587e-05	10.0652	69513.3	119614455	1 (1 0 0 0 0)
hypothetical protein LOC130355 [Homo sapiens]	0.00320628	10.0647	14599.6	148540038	1 (1 0 0 0 0)
novel protein similar to human breakpoint cluster region (BCR) [Danio r	0.0050864	10.064	86348.8	37606127	1 (1 0 0 0 0)
S45344 TUP1 like enhancer - human	0.00545555	10.0633	84461.5	631489	1 (1 0 0 0 0)
yippee-like 3 [Mus musculus]	0.00361039	10.0626	13599.6	21313616	1 (1 0 0 0 0)
transmembrane 4 superfamily member 5 [Homo sapiens]	0.00458652	10.0607	20808.3	21265113	1 (1 0 0 0 0)
DLG4_HUMAN Discs large homolog 4 (Postsynaptic density protein 95) (PSD-95) (	0.00877017	10.0602	80445.9	71658825	1 (1 0 0 0 0)
hypothetical protein [Homo sapiens]	0.000135573	10.0584	64213.9	57997498	1 (1 0 0 0 0)
KIAA0431 [Homo sapiens]	7.82796e-05	10.0581	78264	40788259	4 (2 1 1 0 0)
hypothetical protein [Homo sapiens]	0.0055358	10.0572	21189.8	50949411	1 (1 0 0 0 0)
envelope glycoprotein gp105 [Human immunodeficiency virus 2]	0.00900145	10.0571	12665.5	8671152	1 (1 0 0 0 0)
squamous cell carcinoma antigen recognized by T cells 1 [Homo sapiens]	0.00535174	10.057	90200.3	10863889	1 (1 0 0 0 0)
reverse transcriptase [Human immunodeficiency virus 1]	0.00165883	10.0548	24474.8	23955234	1 (1 0 0 0 0)
AF471453_1 Ig heavy chain variable region, VH3 family [Homo sapiens] [MAS	0.00277008	10.0541	13020.3	33319450	1 (1 0 0 0 0)
unnamed protein product [Homo sapiens]	0.0077123	10.0541	80956.6	21751556	2 (1 0 1 0 0)
immunoglobulin heavy chain variable region [Homo sapiens]	0.00357995	10.0538	12137.9	15777394	1 (1 0 0 0 0)
pol polyprotein [Human immunodeficiency virus 1] [MAS	0.00195325	10.0532	113685	328569	1 (1 0 0 0 0)
pol protein [Human immunodeficiency virus 1]	0.00923672	10.0527	57339.5	116278042	3 (2 0 0 1 0)
PQ0652 outer capsid spike protein VP4 - human rotavirus (strain AU228) (fragment)	0.00390482	10.0525	27833.7	540793	1 (1 0 0 0 0)
FREM1_HUMAN FRAS1-related extracellular matrix protein 1 precursor (Protein Q	0.00366613	10.052	243968	73620901	1 (1 0 0 0 0)
envelope glycoprotein [Human immunodeficiency virus 1]	0.00130636	10.0519	19726	125395477	1 (1 0 0 0 0)
T cell receptor alpha chain [Homo sapiens]	0.00393831	10.0514	8497.37	2792380	1 (1 0 0 0 0)
histone H2A.2 [Homo sapiens]	0.000242125	10.0512	13898.5	31979	1 (1 0 0 0 0)
envelope protein [Human immunodeficiency virus type 1]	0.00601486	10.0508	96556.4	10732694	1 (1 0 0 0 0)
A46054 GTP-binding protein ARD 1 - human	0.00426689	10.0505	64025.5	422756	1 (1 0 0 0 0)
unnamed protein product [Homo sapiens]	0.00527557	10.0503	13700.7	3980124	1 (1 0 0 0 0)
RAB3 GTPase-activating protein [Homo sapiens]	0.00458258	10.0502	110454	55743118	1 (1 0 0 0 0)
apolipoprotein B mRNA editing enzyme, catalytic polypeptide-like 3G [H	0.00616015	10.0498	46377.6	13399304	1 (1 0 0 0 0)
Chain , Cdc42 From Human, Nmr, 20 Structures	0.00777712	10.0498	21473.2	2624582	1 (1 0 0 0 0)
hCG1650573, isoform CRA_b [Homo sapiens]	0.00123303	10.0496	23960.1	119600782	1 (1 0 0 0 0)
hypothetical protein DDBDRAFT_0167152 [Dictyostelium discoideum AX4]	0.00318337	10.0482	126466	66819831	2 (0 1 0 0 1)
chromobox homolog 8 [Homo sapiens]	0.00451965	10.0477	43369.5	10190682	1 (1 0 0 0 0)
AF471549_1 Ig heavy chain variable region, VH3 family [Homo sapiens] [MAS	0.00321027	10.0475	12714.2	33319642	1 (1 0 0 0 0)
hCG2002978 [Homo sapiens]	0.00366384	10.047	16902.6	119572333	1 (1 0 0 0 0)
gp120 protein [Human immunodeficiency virus 1] [MA	0.00303812	10.0467	30889.3	22266416	1 (1 0 0 0 0)
tat protein [Human immunodeficiency virus 1]	0.00851624	10.0455	11493.5	38491903	8 (5 0 1 2 0)
gag protein [Human immunodeficiency virus 1]	0.00435383	10.0447	16388.1	124745393	1 (1 0 0 0 0)
LF3 [Human herpesvirus 4 type 1]	0.002257	10.0441	94249.9	82503263	1 (1 0 0 0 0)
hCG2012759 [Homo sapiens]	0.00402131	10.0434	12240.2	119591499	1 (1 0 0 0 0)
KIAA0635 protein [Homo sapiens]	0.00675416	10.0431	101348	40788309	2 (0 0 1 1 0)
MHC class I antigen [Homo sapiens]	0.00158557	10.043	34246.6	103064784	1 (1 0 0 0 0)
immunoglobulin heavy chain variable region [Homo sapiens]	0.00207381	10.041	14242.1	8809877	1 (1 0 0 0 0)
envelope glycoprotein [Human immunodeficiency virus 1]	0.00931773	10.0394	13614.8	28916284	1 (1 0 0 0 0)
envelope glycoprotein [Human immunodeficiency virus 1]	0.00317204	10.0368	98138.2	113201824	1 (1 0 0 0 0)
hypothetical protein MGC2615 in Homo sapiens; similar to NM_024103 hypot	0.000628798	10.0365	21855.6	29841426	4 (1 0 2 1 0)
unnamed protein product [Homo sapiens]	0.00623962	10.0363	59594.1	22760140	2 (0 1 0 0 1)
sex comb on midleg homolog 1 (Drosophila) [Homo sapiens]	0.0039851	10.0333	72007.7	55664127	1 (1 0 0 0 0)
RAB3B, member RAS oncogene family [Homo sapiens]	5.61376e-09	8.16626	24742.1	19923750	2 (0 1 0 0 1)
reverse transcriptase [Human immunodeficiency virus 1]	0.000321347	8.14499	32923	55705774	1 (0 1 0 0 0)
hypothetical protein LOC345651 [Homo sapiens]	0.000296973	8.14026	41976	63055057	3 (0 2 1 0 0)
unnamed protein product [Homo sapiens]	0.000109221	8.13435	27528.8	10436240	3 (1 2 0 0 0)
Na,K-ATPase catalytic subunit alpha-A protein [Homo sapiens]	1.68331e-05	8.12458	3563.7	5919228	1 (0 1 0 0 0)
hCG2041433 [Homo sapiens]	0.00718666	8.12132	17874.1	119590516	5 (1 2 0 1 1)
AF137788_1 envelope glycoprotein [Human immunodeficiency virus type 1] [MA	0.00547124	8.11601	21866	6940977	1 (0 1 0 0 0)
unnamed protein product [Homo sapiens]	0.00901449	8.11369	35738.8	32486	2 (1 1 0 0 0)
Unknown [Homo sapiens]	0.00224088	8.11313	37662.5	4406607	4 (0 1 2 1 0)
Rab9 expressed pseudogene [Homo sapiens]	0.00338053	8.11034	4432.3	1174151	1 (0 1 0 0 0)
dedicator of cytokinesis 4, isoform CRA_d [Homo sapiens]	0.00503901	8.10403	166436	119603860	5 (0 2 2 0 1)
EPS (human endocytosis) related family member (eps-8) [Caenorhabdi	0.000345182	8.10364	104301	115533054	2 (0 0 1 0 1)
neurofilament, light polypeptide 68kDa, isoform CRA_b [Homo sapiens] [M	0.00100113	8.10298	56924	119584005	1 (0 1 0 0 0)
ATP synthase, H+ transporting, mitochondrial F1 complex, beta subunit	0.00453596	8.10281	56524.7	32189394	8 (1 5 1 1 0)
hCG2038487 [Homo sapiens]	0.000940443	8.10183	10331.3	119593418	1 (0 1 0 0 0)
NFU1_HUMAN NFU1 iron-sulfur cluster scaffold homolog (HIRA-interacting protei	0.00481214	8.10113	21787.8	22256812	2 (0 0 1 0 1)
envelope glycoprotein [Human immunodeficiency virus 1]	0.00962958	8.09928	2788.44	28974145	1 (0 1 0 0 0)
immunoglobulin heavy chain variable region [Homo sapiens]	0.000567636	8.09854	10852.3	112695099	1 (0 1 0 0 0)
galactose-1-phosphate uridyl transferase [Homo sapiens]	0.00929364	8.09436	5241.58	950359	1 (0 1 0 0 0)
myostatin [Homo sapiens]	0.00613026	8.09017	42722.5	4885259	1 (0 1 0 0 0)
immunoglobulin heavy chain variable region [Homo sapiens]	0.00783597	8.0883	8480.18	26801055	1 (0 1 0 0 0)
hypothetical protein LOC51233, isoform CRA_b [Homo sapiens]	0.00959857	8.08794	18838.7	119579990	1 (0 1 0 0 0)
hypothetical protein [Homo sapiens]	0.00503701	8.0874	25742.7	68161840	1 (0 1 0 0 0)
Tax1 (human T-cell leukemia virus type I) binding protein 3, isoform CR	0.000829042	8.08716	14546.5	148680766	1 (0 1 0 0 0)
c-fes [Homo sapiens]	0.000742037	8.08408	93412.3	29891	1 (0 1 0 0 0)
septin 2 [Homo sapiens]	0.00757182	8.08403	41461.3	4758158	2 (0 0 1 0 1)
envelope protein [Human immunodeficiency virus 1] [	0.00431448	8.08145	97586.4	55735982	2 (0 1 0 1 0)
pol protein [Human immunodeficiency virus 1]	0.00882968	8.0814	40064.1	118139359	2 (0 1 0 0 1)
low density lipoprotein receptor-related protein 6 [Homo sapiens]	0.000569997	8.08004	180314	148727288	1 (0 1 0 0 0)
reverse transcriptase [Human immunodeficiency virus type 1]	0.00375241	8.07902	64943	3776303	1 (0 1 0 0 0)
unnamed protein product [Homo sapiens]	0.00260841	8.07782	40758	10438372	1 (0 1 0 0 0)
pericentriolar material 1, isoform CRA_a [Homo sapiens]	0.000793676	8.07696	228386	119584200	2 (0 0 1 0 1)
hCG2010747 [Homo sapiens]	0.00353238	8.07676	11936.9	119579985	2 (0 1 0 1 0)
interleukin 18 receptor accessory protein precursor [Homo sapiens]	0.00133826	8.07505	68266.4	4504657	1 (0 1 0 0 0)
unnamed protein product [Homo sapiens]	0.00618488	8.07332	53448.4	10436305	2 (0 0 1 0 1)
hypothetical protein [Homo sapiens]	0.00287929	8.07182	55389.4	4914604	1 (0 1 0 0 0)
TGF-beta-activated kinase like [Homo sapiens]	0.0062424	8.07107	22382.2	7717312	1 (0 1 0 0 0)
nuclear protein in testis, isoform CRA_b [Homo sapiens]	0.00298385	8.06944	124146	119612711	1 (0 1 0 0 0)
envelope glycoprotein [Human immunodeficiency virus 1]	0.00744517	8.0691	24744.2	80974432	1 (0 1 0 0 0)
ribosomal protein P0 [Homo sapiens]	0.00971785	8.06892	34251.8	4506667	1 (0 1 0 0 0)
ADP-ribosylation factor guanine nucleotide factor 6 isoform a [Homo s	0.00269503	8.06819	115863	117606360	2 (0 0 0 2 0)
unnamed protein product [Homo sapiens]	0.000582337	8.06784	27141.4	34530766	1 (0 1 0 0 0)
hypothetical protein FLJ12571 [Homo sapiens]	0.00582242	8.06689	64005.5	51094793	1 (0 1 0 0 0)
AF470901_1 pol polyprotein [Human immunodeficiency virus type 1]	0.00961452	8.06675	36085.1	21685904	1 (0 1 0 0 0)
AF436128_4 putative regulatory protein E2 [Human papillomavirus - cand89]	0.00493294	8.0643	42489.9	22095326	1 (0 1 0 0 0)
zinc finger with KRAB and SCAN domains 2 [Homo sapiens]	0.00291449	8.06429	110840	61657914	1 (0 1 0 0 0)
KIAA1997 protein [Homo sapiens]	0.00353587	8.06354	191444	29421212	2 (0 0 1 0 1)
immunoglobulin heavy chain variable region [Homo sapiens]	0.00277165	8.06332	10943.4	112695398	1 (0 1 0 0 0)
alkB, alkylation repair homolog 2 [Homo sapiens]	0.00995708	8.06289	29304.2	48717226	2 (0 0 0 2 0)
alpha-1A-adrenergic receptor isoform 1 [Homo sapiens]	0.00731873	8.06262	51452.9	111118992	1 (0 1 0 0 0)
AF138126_1 envelope glycoprotein [Human immunodeficiency virus type 1] [MA	0.0011589	8.06103	23020.4	6941565	1 (0 1 0 0 0)
gp120, c2/v3 region [Human immunodeficiency virus 1]	0.00424006	8.06046	8061.21	1906871	1 (0 1 0 0 0)
pol protein [Human immunodeficiency virus 1]	0.00704053	8.05989	57209.5	116277622	1 (0 1 0 0 0)
human WRN (Werner's syndrome) related family member (wrn-1) [Caenorhab	0.00293943	8.0564	118448	32564293	1 (0 1 0 0 0)
envelope protein [Homo sapiens]	0.0037608	8.05584	20035.2	14020834	2 (0 0 0 2 0)
immunoglobulin lambda-1 variable region [Homo sapiens]	0.00788253	8.05497	11684.6	42760054	1 (0 1 0 0 0)
nef protein [Human immunodeficiency virus 1]	0.00572908	8.05409	22027.9	71801506	1 (0 1 0 0 0)
envelope glycoprotein [Human immunodeficiency virus 1]	0.000515905	8.05355	14894.7	47778488	1 (0 1 0 0 0)
envelope glycoprotein [Human immunodeficiency virus 1]	0.00208194	8.0528	96361.4	60652062	2 (0 0 1 0 1)
unnamed protein product [Homo sapiens]	0.00729742	8.05258	75543	21755884	1 (0 1 0 0 0)
phosphodiesterase 9A isoform a [Homo sapiens]	0.00820302	8.05256	68448.3	4505675	2 (0 0 1 0 1)
envelope glycoprotein [Human immunodeficiency virus 1]	0.00173794	8.05148	10999.8	37695092	1 (0 1 0 0 0)
envelope glycoprotein [Human immunodeficiency virus type 1]	0.0022565	8.05042	97292.8	1710456	1 (0 1 0 0 0)
hCG1792533 [Homo sapiens]	0.00868483	8.04983	17582.9	119584009	1 (0 1 0 0 0)
unknown [Homo sapiens]	0.00839849	8.04863	22434.6	2852648	1 (0 1 0 0 0)
FUS_HRSVA Fusion glycoprotein F0 precursor (Protein F) [Contains: Fusion glycop	0.00106742	8.04856	63413.1	138251	1 (0 1 0 0 0)
immunoglobulin heavy chain variable region [Homo sapiens]	0.00254709	8.04837	10133.7	125950760	1 (0 1 0 0 0)
low density lipoprotein receptor-related protein 11, isoform CRA_a [Hom	0.00582023	8.04797	36400.4	119568169	1 (0 1 0 0 0)
hypothetical protein LOC349136 [Homo sapiens]	0.00672389	8.04713	29025	51105929	2 (0 0 0 2 0)
AF385986_1 envelope glycoprotein [Human immunodeficiency virus 1]	0.00494669	8.04496	12997.5	31071734	1 (0 1 0 0 0)
unnamed protein product [Homo sapiens]	0.00136375	8.04471	61788	7022469	2 (0 0 0 2 0)
solute carrier family 4, sodium bicarbonate transporter-like, member 11	0.00238925	8.04406	63449.1	119630943	1 (0 1 0 0 0)
envelope glycoprotein [Human immunodeficiency virus type 1]	0.00361431	8.04353	97801.3	2289984	1 (0 1 0 0 0)
immunoglobulin heavy chain variable region [Homo sapiens]	0.00218975	8.04137	10950.3	112701636	1 (0 1 0 0 0)
unnamed protein product [Homo sapiens]	0.00635188	8.0405	23501.2	7021867	1 (0 1 0 0 0)
envelope glycoprotein [Human immunodeficiency virus type 1]	0.00920545	8.03666	30757.7	4679570	1 (0 1 0 0 0)
CE152_HUMAN Centrosomal protein of 152 kDa (Cep152 protein)	0.00208463	6.14199	147252	62286590	4 (0 2 2 0 0)
S73539_1 Unknown [Homo sapiens]	0.000890811	6.12431	2923.54	4261831	4 (1 0 0 2 1)
actin-like protein [Homo sapiens]	1.70483e-07	6.09933	11528.9	62421162	2 (0 1 1 0 0)
solute carrier family 39 (metal ion transporter), member 5 [Homo sapie	0.00965376	6.08578	56294.1	27734777	2 (0 0 0 1 1)
ZNF235 protein [Homo sapiens]	0.00483894	6.08344	20734.5	76779806	2 (0 0 0 1 1)
hypothetical protein LOC91442 [Homo sapiens]	0.000908558	6.08128	23881.8	22748623	4 (0 1 1 2 0)
hypothetical protein CX157 [Homo sapiens]	0.00348692	6.08094	13360.8	14585847	2 (0 1 1 0 0)
DEAH (Asp-Glu-Ala-His) box polypeptide 40, isoform CRA_e [Homo sapiens]	0.00716149	6.07702	50220	119614812	2 (0 1 1 0 0)
HHCM_HUMAN Hepatocellular carcinoma protein HHCM (HHC(M))	0.00392299	6.07421	52117.5	1170272	2 (0 0 0 1 1)
pol protein [Human immunodeficiency virus 1]	0.00823076	6.07327	57005.4	116276247	3 (0 1 0 1 1)
tyrosine 3/tryptophan 5 -monooxygenase activation protein, epsilon poly	0.00515313	6.06544	29155.4	5803225	2 (0 0 0 1 1)
peroxisomal biogenesis factor 14 [Homo sapiens]	0.000942201	6.05512	41211.7	4758896	2 (0 1 1 0 0)
AF152891_1 capsid protein VP1 [Human echovirus 30] [M	0.0090826	6.04246	32885	6580935	2 (1 0 1 0 0)
ATPase, H+ transporting, lysosomal V0 subunit a4 [Homo sapiens]	0.00116314	2.07735	96382.3	80475971	2 (0 1 0 0 1)
