# Supplementary material for: ER stress induced immunopathology involving complement in CADASIL: implications for therapeutics
Source: Acta Neuropathol Commun. 2023 May 8;11:76. doi: 10.1186/s40478-023-01558-1 (PMC10169505; doi:10.1186/s40478-023-01558-1)
Supplement: Supplementary file 4 — Supplementary Material 4 [file 40478_2023_1558_MOESM4_ESM.xlsx]

## Sheet: Control_1_RIPA
ER Stress Induced Immunopathology involving Complement in CADASIL: Implications for Therapeutics
Mahmod Panahi, Yoshiki Hase, Xavier Gallart-Palau, Sumonto Mitra, Atsushi Watanabe, Roger C Low, Yumi Yamamoto, Diego Sepulveda-Falla, Atticus H Hainsworth, Masafumi Ihara, Siu Kwan Sze, Matti Viitanen, Homira Behbahani, Raj N Kalaria
Supplementary information
Supplementary dataset 3: List of total proteins identified by LC-MS/MS in RIPA fractions of control subjects. Each tab referes to the total proteins identified in each individual.
Description	P-value	Score	MW	Accession	Peptide (Hits)
neurofilament, light polypeptide 68kDa [Homo sapiens]	1.67766e-08	184.187	61479.3	105990539	27 (21 4 1 1 0)
2',3'-cyclic-nucleotide 3'-phosphodiesterase (EC 3.1.4.37)	8.12006e-10	180.289	45070.4	180687	32 (20 6 2 4 0)
neurofilament, medium polypeptide 150kDa [Homo sapiens]	1.18602e-11	178.246	102386	4885513	26 (23 1 1 1 0)
glial fibrillary acidic protein [Homo sapiens]	3.12798e-07	176.159	49849.7	4503979	30 (28 0 1 0 1)
myelin basic protein isoform 1 [Homo sapiens]	5.88401e-09	162.219	21480	68509930	103 (82 9 8 3 1)
unknown [Homo sapiens]	8.55205e-12	130.3	268547	62988842	14 (13 1 0 0 0)
Na+/K+ -ATPase alpha 1 subunit isoform a proprotein [Homo sapiens]	2.3404e-06	116.19	112824	21361181	17 (16 0 1 0 0)
I38369 beta-tubulin - human (fragment)	1.55953e-09	112.164	48848.5	2119276	20 (16 3 1 0 0)
Na+/K+ -ATPase alpha 2 subunit proprotein [Homo sapiens]	3.89429e-10	110.264	112194	4502271	24 (22 1 0 0 1)
brain abundant, membrane attached signal protein 1 [Homo sapiens]	4.82205e-07	110.191	22680	30795231	18 (16 1 0 1 0)
SPTAN1 protein [Homo sapiens]	9.54258e-10	106.156	282106	31565122	13 (8 0 3 2 0)
ATP synthase, H+ transporting, mitochondrial F1 complex, alpha subunit	6.58155e-10	104.208	59713.7	4757810	18 (16 1 1 0 0)
proteolipid protein [Rattus norvegicus]	9.87339e-08	100.207	30057.1	13591880	62 (54 3 3 0 2)
tubulin alpha 6 [Homo sapiens]	3.39609e-10	96.2208	49863.5	14389309	19 (18 0 1 0 0)
Na+,K+ ATPase [Homo sapiens]	6.60308e-07	90.208	111901	1359715	13 (9 3 1 0 0)
A Chain A, Crystal Structure Of A DictyosteliumTETRAHYMENA CHIMERA Actin (Mutan	4.51071e-08	88.2262	41719.9	7245526	20 (16 2 2 0 0)
microtubule-associated protein 1B isoform 1 [Homo sapiens]	4.20321e-05	88.1081	270452	5174525	11 (8 0 0 2 1)
tubulin, beta 4 [Homo sapiens]	9.60216e-10	76.2421	49553.9	21361322	17 (11 4 0 1 1)
ATRB actin, skeletal muscle - rabbit	0.000569015	76.217	41789.8	71611	16 (11 3 0 1 1)
Na+/K+ -ATPase beta 1 subunit isoform a [Homo sapiens]	6.838e-07	66.2021	35038.9	4502277	13 (12 0 1 0 0)
dihydropyrimidinase-like 2 [Homo sapiens]	1.30614e-07	60.1844	62254.7	4503377	9 (9 0 0 0 0)
unnamed protein product [Homo sapiens]	8.05735e-06	60.1342	57919.5	28940	10 (7 0 1 2 0)
brain creatine kinase [Homo sapiens]	5.30305e-08	58.2399	42617.4	21536286	10 (8 1 0 0 1)
neural cell adhesion molecule 1 isoform 3 [Homo sapiens]	6.36093e-08	58.1581	83718	115529478	6 (5 1 0 0 0)
MDHM_HUMAN Malate dehydrogenase, mitochondrial precursor	2.6345e-08	56.1189	35508.8	6648067	6 (5 0 1 0 0)
APOB_HUMAN Apolipoprotein B-100 precursor (Apo B-100) [Contains: Apolipoprotein	0.0090348	56.0695	515242	114014	9 (1 4 1 3 0)
internexin neuronal intermediate filament protein, alpha [Homo sapiens	3.77811e-05	54.13	55357.5	14249342	6 (4 1 1 0 0)
enolase 2 [Homo sapiens]	9.81543e-10	52.2359	47239.1	5803011	7 (5 1 0 1 0)
prostatic binding protein [Homo sapiens]	2.55063e-08	52.1643	21043.7	4505621	6 (5 0 0 0 1)
sirtuin 2 isoform 1 [Homo sapiens]	0.000973157	52.154	43154.5	13775600	7 (5 1 0 1 0)
glyceraldehyde-3-phosphate dehydrogenase [Homo sapiens]	7.39229e-10	50.2021	36030.4	7669492	11 (10 0 1 0 0)
B Chain B, X-Ray Crystal Structure Of Human Galectin-1	1.08085e-08	50.1552	14575.2	42542978	6 (6 0 0 0 0)
GNAO2_HUMAN Guanine nucleotide-binding protein G(o) subunit alpha 2	3.26099e-06	48.1756	40061.1	60416433	9 (8 1 0 0 0)
B Chain B, T-To-T(High) Quaternary Transitions In Human Hemoglobin: Deshis146b	0.000609756	46.2199	15720.2	61679604	7 (4 3 0 0 0)
AT2B4_HUMAN Plasma membrane calcium-transporting ATPase 4 (PMCA4) (Plasma mem	0.00276117	44.1726	137833	14286105	5 (4 0 0 1 0)
syntaxin binding protein 1 isoform a [Homo sapiens]	1.01347e-05	42.1395	68692.3	4507297	6 (5 0 0 0 1)
heavy neurofilament subunit [Homo sapiens]	1.42722e-06	40.1971	111713	1841430	9 (8 0 0 1 0)
guanine nucleotide-binding protein, beta-1 subunit [Mus musculus]	6.11922e-06	40.1612	37353	6680045	7 (6 1 0 0 0)
tubulin, alpha 1B [Mus musculus]	4.88411e-07	40.1557	50119.6	34740335	8 (8 0 0 0 0)
KIAA0325 protein [Homo sapiens]	2.81804e-06	40.1159	533404	71891782	6 (2 1 1 1 1)
bromodomain containing protein 1 [Homo sapiens]	0.00728292	40.0889	119444	11321642	5 (1 3 1 0 0)
autogenous vein graft remodeling associated protein 8 [Homo sapiens] [	0.00594254	40.0553	80577.5	125858428	5 (2 1 2 0 0)
pyruvate dehydrogenase (lipoamide) beta [Homo sapiens]	1.00736e-06	38.1897	39224.1	4505687	4 (3 1 0 0 0)
STX1B_HUMAN Syntaxin-1B1 (Syntaxin 1B)	1.06442e-08	38.1586	33410.1	2501085	6 (5 1 0 0 0)
ATP synthase, H+ transporting, mitochondrial F0 complex, subunit d isof	3.34146e-07	38.1495	18479.5	5453559	6 (5 1 0 0 0)
WMBEHQ UL5 protein - human herpesvirus 2 (strain HG52) (fragment)	0.00278613	38.1376	88093.8	74001	13 (3 7 1 2 0)
breast carcinoma amplified sequence 1 [Homo sapiens]	3.719e-06	36.1493	61681.5	4502373	5 (2 0 2 1 0)
clathrin heavy chain 1 [Homo sapiens]	0.000145722	36.1481	191492	4758012	5 (2 1 1 0 1)
myelin oligodendrocyte glycoprotein [Homo sapiens] [M	3.53843e-05	36.1436	28175	793839	7 (4 2 1 0 0)
synaptotagmin I [Homo sapiens]	0.000209982	36.1064	47542.8	5032139	6 (4 1 1 0 0)
KIAA0191 [Homo sapiens]	0.00801055	36.0723	171002	1228035	5 (2 1 1 0 1)
KIAA1506 protein [Homo sapiens]	0.00726733	36.0508	361910	20521928	4 (2 2 0 0 0)
heat shock 70kDa protein 5 [Homo sapiens]	3.106e-06	34.1647	72288.5	16507237	5 (4 0 0 1 0)
unnamed protein product [Homo sapiens]	4.0232e-07	34.1498	49811	10433717	5 (1 3 1 0 0)
Nogo-A protein [Homo sapiens]	0.000809137	34.1293	129861	9408096	4 (3 0 0 1 0)
KIAA0624 protein [Homo sapiens]	0.00871281	34.0818	221820	3327062	6 (1 1 3 1 0)
hCG2012292 [Homo sapiens]	0.00106453	34.0727	193537	119629612	5 (1 2 1 0 1)
tubulin polymerization promoting protein [Homo sapiens]	4.12258e-10	30.2111	23679.2	5902018	3 (3 0 0 0 0)
solute carrier family 25 (mitochondrial carrier; adenine nucleotide tr	3.28953e-07	30.1597	33043.2	55749577	5 (5 0 0 0 0)
chaperonin [Homo sapiens]	1.21556e-06	30.1518	61016.5	31542947	3 (3 0 0 0 0)
synaptosomal-associated protein 25 isoform SNAP25A [Homo sapiens]	3.60144e-05	30.124	23321.2	18765733	7 (5 0 1 1 0)
cytochrome c oxidase subunit VIb [Homo sapiens]	0.000116378	30.0852	10185.7	4502985	3 (3 0 0 0 0)
leucine-rich repeat-containing 8 [Homo sapiens]	0.00338099	30.0772	94138.8	62241040	3 (3 0 0 0 0)
chromosome 17 open reading frame 27 [Homo sapiens]	0.00535204	30.0706	373741	66571327	3 (3 0 0 0 0)
prosaposin isoform a preproprotein [Homo sapiens]	1.63203e-06	28.1921	58073.9	11386147	5 (3 2 0 0 0)
tubulin, beta, 4 [Homo sapiens]	1.44438e-07	28.1133	50400.3	50592996	6 (4 1 1 0 0)
CD92 protein [Homo sapiens]	0.00498167	28.0903	72933.4	16945323	4 (1 2 0 0 1)
3-oxoacid CoA transferase 1 precursor [Homo sapiens]	0.000167393	28.0755	56122	4557817	3 (2 1 0 0 0)
obscurin, cytoskeletal calmodulin and titin-interacting RhoGEF isoform	0.000105859	28.0635	721127	58331253	25 (3 1 1 16 4)
MYH10_HUMAN Myosin-10 (Myosin heavy chain 10) (Myosin heavy chain, nonmuscle I	0.00454402	26.1025	228797	1346640	5 (1 0 2 0 2)
DHPR_HUMAN Dihydropteridine reductase (HDHPR) (Quinoid dihydropteridine redu	2.03872e-05	26.0904	25773	118572639	4 (3 0 1 0 0)
myristoylated alanine-rich protein kinase C substrate [Homo sapiens]	0.00131531	26.0777	31525.9	11125772	4 (1 1 0 2 0)
TXLNB_HUMAN Beta-taxilin (Muscle-derived protein 77) (hMDP77)	0.00947014	26.0653	76472.1	55583953	3 (2 0 1 0 0)
CD9 antigen [Homo sapiens]	4.45488e-06	24.2541	25399	4502693	5 (4 0 0 1 0)
G01650 malate dehydrogenase (EC 1.1.1.37), cytosolic - human [M	2.44708e-07	24.1747	36392	7431153	3 (2 0 0 1 0)
tyrosine 3/tryptophan 5 -monooxygenase activation protein, zeta polypep	2.50262e-08	24.1498	27727.7	4507953	3 (2 0 0 1 0)
KIAA1603 protein [Homo sapiens]	0.00798013	24.1048	190236	29421202	4 (1 1 0 1 1)
U75 [Human herpesvirus 7]	0.00205861	24.0853	29356.5	51874297	3 (2 0 0 1 0)
A30802 Ca2+-transporting ATPase (EC 3.6.3.8) 2, plasma membrane - human	0.000805075	24.0842	134625	86988	3 (2 0 0 1 0)
pyruvate kinase 3 isoform 1 [Homo sapiens]	0.00257224	24.0836	57900.2	33286418	3 (1 1 1 0 0)
annexin VI isoform 1 [Homo sapiens]	0.00144546	24.0763	75825.7	71773329	3 (2 0 0 1 0)
U28 [Human herpesvirus 7]	0.000164259	24.0614	93009.1	51874250	3 (2 0 0 1 0)
SHPS1_HUMAN Tyrosine-protein phosphatase non-receptor type substrate 1 precur	2.21542e-10	22.2013	54778.7	29427656	3 (2 0 0 0 1)
A Chain A, Crystal Structure Of Human Cd81 Extracellular Domain, A Receptor Fo	2.70009e-05	22.1726	9898.87	13399775	3 (2 0 0 0 1)
proteoglycan PG-M(V3) [Homo sapiens]	5.05406e-07	22.1294	74200.6	1008913	3 (1 1 0 1 0)
hCG1997024 [Homo sapiens]	0.00449156	22.1129	12311.3	119620147	4 (2 1 0 1 0)
KIAA0856 protein [Homo sapiens]	0.00555533	22.112	250097	20521676	4 (1 1 0 0 2)
ral guanine nucleotide dissociation stimulator-like 2, isoform CRA_c [H	0.00347603	22.094	43158.4	119624115	3 (2 0 0 0 1)
titin [Homo sapiens]	0.00374815	22.0765	121126	37193	3 (2 0 0 0 1)
timeless homolog [Homo sapiens]	0.00791321	22.0712	138544	4507507	3 (2 0 0 0 1)
S66264 55.11 protein homolog - human (fragment)	0.00570067	22.0631	99252.7	2134674	3 (1 1 0 1 0)
unnamed protein product [Homo sapiens]	0.00350872	22.0503	114961	21749523	3 (2 0 0 0 1)
vesicle-associated membrane protein 2 (synaptobrevin 2) [Homo sapiens]	4.29656e-13	20.2091	12640.7	7657675	4 (4 0 0 0 0)
cofilin 1 (non-muscle) [Homo sapiens]	2.85605e-06	20.1839	18490.7	5031635	2 (2 0 0 0 0)
A Chain A, Crystal Structure Of Caenorhabditis Elegans Mg-Atp Actin Complexed	6.05752e-07	20.1834	41637.7	14278147	4 (2 2 0 0 0)
crystallin, alpha B [Homo sapiens]	2.18099e-08	20.1804	20146.4	4503057	2 (2 0 0 0 0)
visinin-like 1 [Mus musculus]	2.18297e-06	20.1749	22128	6755983	3 (3 0 0 0 0)
N-myc downstream-regulated gene 2 isoform a [Homo sapiens]	3.46045e-08	20.1745	40772.2	42544211	2 (2 0 0 0 0)
KRHU2 keratin 1, type II, cytoskeletal - human	1.36219e-05	20.169	65454.4	7428712	4 (3 1 0 0 0)
synaptosomal-associated protein, 25kDa [Homo sapiens]	1.1987e-05	20.1665	10676	24740601	3 (3 0 0 0 0)
alpha-spectrin [Homo sapiens]	8.69158e-06	20.1462	43790.8	829111	2 (2 0 0 0 0)
hypothetical protein [Homo sapiens]	0.0059084	20.1406	110722	52545742	2 (2 0 0 0 0)
guanine nucleotide binding protein (G protein), gamma 2 subunit [Mus mu	0.000378521	20.1362	7845.03	6754020	3 (2 0 0 1 0)
ras related v-ral simian leukemia viral oncogene homolog A [Homo sapie	4.24491e-05	20.1302	23552	33946329	3 (3 0 0 0 0)
potassium channel, subfamily K, member 13 [Homo sapiens]	0.00148262	20.1194	45361.9	16306555	3 (1 0 1 1 0)
dihydrolipoamide dehydrogenase precursor [Homo sapiens]	5.79353e-05	20.1146	54143.1	91199540	2 (2 0 0 0 0)
tubulin, beta 2 [Homo sapiens]	1.67871e-07	20.1143	49875	4507729	3 (3 0 0 0 0)
heat shock 70kDa protein 8 isoform 2 [Homo sapiens]	0.000145045	20.113	53484.5	24234686	3 (3 0 0 0 0)
cul-3 [Homo sapiens]	8.25465e-05	20.1089	39250.4	3360457	2 (2 0 0 0 0)
myelin basic protein isoform 4 [Homo sapiens]	0.00134819	20.1044	17332.8	68509932	5 (5 0 0 0 0)
tubulin, alpha-like 3 [Homo sapiens]	0.000537071	20.0999	49876.8	13376181	3 (2 0 1 0 0)
syntaxin 1A (brain) [Homo sapiens]	0.000113357	20.0887	33002.7	4759182	2 (2 0 0 0 0)
Ras-interacting protein 1 [Homo sapiens]	0.00613439	20.0818	103393	38570105	3 (1 1 0 0 1)
KIAA2017 protein [Homo sapiens]	0.00350931	20.0749	349280	71891721	2 (2 0 0 0 0)
claudin 11 [Homo sapiens]	3.66986e-06	20.0734	21978.4	10938016	3 (3 0 0 0 0)
mitochondrial short-chain enoyl-coenzyme A hydratase 1 precursor [Homo	0.000258628	20.0728	31351.1	12707570	2 (2 0 0 0 0)
gelsolin isoform a precursor [Homo sapiens]	0.000342127	20.072	85644.2	4504165	2 (2 0 0 0 0)
tau-tubulin kinase [Homo sapiens]	0.00407095	20.07	182352	27451602	2 (2 0 0 0 0)
coatomer protein complex, subunit gamma 1 [Homo sapiens]	0.00486948	20.0628	97655.6	11559929	2 (2 0 0 0 0)
hypothetical protein [Homo sapiens]	0.00144896	20.0547	18150.4	21740133	2 (2 0 0 0 0)
keratin [Homo sapiens]	1.41751e-05	18.169	51303.3	1200072	5 (1 3 0 0 1)
KIAA0553 protein [Homo sapiens]	0.00380181	18.1211	157862	58257658	2 (1 1 0 0 0)
RAB3A, member RAS oncogene family [Homo sapiens]	0.000465817	18.1172	24968.1	4506367	2 (1 1 0 0 0)
neural precursor cell expressed, developmentally down-regulated 9 isofo	0.00297071	18.1108	92802.4	5453680	3 (2 1 0 0 0)
PKHA4_HUMAN Pleckstrin homology domain-containing family A member 4 (Phosphoi	0.0055219	18.1077	85349.1	48474644	2 (1 1 0 0 0)
alpha actinin 4 [Homo sapiens]	0.000687873	18.1073	102204	2804273	2 (1 1 0 0 0)
5'-nucleotidase domain containing 3 isoform 2 [Homo sapiens]	0.00902308	18.0824	55685.2	7706749	2 (1 1 0 0 0)
neurogenic differentiation 6 [Homo sapiens]	0.0028743	18.0789	38680.3	27475985	26 (4 8 9 4 1)
KIAA0041 [Homo sapiens]	0.000720095	18.0751	88243.3	27529706	2 (1 1 0 0 0)
B46091 H+-exporting ATPase (EC 3.6.3.6) chain A, vacuolar (VA68 type) - human	0.00771177	18.0719	68204.5	1082432	2 (1 1 0 0 0)
A Chain A, Human Heart L-Lactate Dehydrogenase H Chain, Ternary Complex With N	0.00997091	18.0684	36484.1	13786847	2 (1 1 0 0 0)
glycerol-3-phosphate dehydrogenase 2 (mitochondrial) [Homo sapiens	0.00310214	18.0673	80782.6	133908614	3 (0 1 1 1 0)
KIAA0143 [Homo sapiens]	0.00628451	18.0607	98798	1469868	4 (1 0 0 2 1)
DNA topoisomerase (ATP-hydrolysing); topoisomerase II beta [Homo sapiens	0.00932008	18.0571	80364.7	4218208	2 (1 1 0 0 0)
peroxiredoxin 2 isoform a [Homo sapiens]	3.02525e-07	16.15	21878.2	32189392	2 (1 0 1 0 0)
guanine nucleotide-binding protein, beta-2 subunit [Mus musculus]	7.47797e-07	16.1375	37307.1	13937391	2 (1 0 1 0 0)
A54770 N-acetylglucosamine-specific receptor 1 precursor - human	0.0048296	16.1192	52304.9	627551	4 (0 2 0 2 0)
ENV_HV2D1 Envelope glycoprotein gp160 precursor (Env polyprotein) [Contains: Su	0.00403651	16.0949	97116.6	119455	2 (1 0 1 0 0)
sideroflexin 1 [Homo sapiens]	0.00184064	16.0943	35596.3	23618867	2 (1 0 1 0 0)
unnamed protein product [Homo sapiens]	0.00977804	16.0922	37237.2	16552323	2 (0 2 0 0 0)
UFO_HUMAN Tyrosine-protein kinase receptor UFO precursor (AXL oncogene)	0.00627715	16.0914	97374.7	48429194	2 (0 2 0 0 0)
KIAA0070 [Homo sapiens]	0.00790417	16.0856	68359.9	505108	2 (0 2 0 0 0)
regulator of G-protein signalling 12 isoform 1 [Homo sapiens]	0.00620296	16.0807	156260	38327601	2 (1 0 1 0 0)
72.1 protein [Homo sapiens]	0.00645135	16.0795	17802.2	439656	2 (0 2 0 0 0)
unnamed protein product [Homo sapiens]	0.00619027	16.0786	27940.9	7023532	2 (0 2 0 0 0)
reverse transcriptase [Human immunodeficiency virus 1]	0.00798607	16.0784	4791.39	4520541	3 (1 1 1 0 0)
solute carrier family 8 member 3 isoform A precursor [Homo sapiens]	0.000630867	16.0722	102737	15147254	2 (1 0 1 0 0)
Tax1 (human T-cell leukemia virus type I) binding protein 1 [Xenopus t	0.00923099	16.0679	97019.9	45361339	2 (1 0 1 0 0)
U48, glycoprotein H, gH [Human herpesvirus 6A]	0.00342019	16.0618	79503.8	9628350	2 (1 0 1 0 0)
unnamed protein product [Homo sapiens]	0.0090219	16.0592	52610.6	16553131	2 (1 0 1 0 0)
unnamed protein product [Homo sapiens]	0.00596721	16.0573	77102.7	14041976	2 (1 0 1 0 0)
KIAA1620 protein [Homo sapiens]	0.00254723	16.054	148334	10047317	2 (1 0 1 0 0)
zinc finger protein 33A isoform b [Homo sapiens]	0.00596932	16.0533	94322.9	28274682	3 (1 0 0 1 1)
prostaglandin H2 D-isomerase [Homo sapiens]	0.000143941	14.1725	21015.3	32171249	2 (1 0 0 1 0)
IMMT_HUMAN Mitochondrial inner membrane protein (Mitofilin) (p87/89) (Prolife	1.57764e-08	14.1405	83626.5	29427676	2 (1 0 0 1 0)
synaptophysin [Homo sapiens]	5.48397e-05	14.1123	32083.5	899301	2 (1 0 0 1 0)
hypothetical protein LOC92345 [Homo sapiens]	0.00637683	14.1084	53669.2	19923911	2 (1 0 0 1 0)
hypothetical protein [Homo sapiens]	0.0081051	14.1047	120235	50949774	2 (1 0 0 1 0)
SI:bZ6L08.1 (novel protein similar to human cadherin, EGF LAG seven-pas	0.000275573	14.1037	197357	26788046	4 (0 0 2 1 1)
transforming acidic coiled coil 2, long isoform [Homo sapiens]	0.00947378	14.089	309211	28933422	2 (0 1 1 0 0)
R Chain R, Twinning In Crystals Of Human Skeletal Muscle D- Glyceraldehyde-3-Pho	0.00457596	14.0799	35853.3	230867	2 (0 1 1 0 0)
unnamed protein product [Homo sapiens]	0.00734296	14.0772	24317.8	34527265	2 (1 0 0 1 0)
AF154671_1 CRB1 [Homo sapiens]	0.00454573	14.0741	151312	6014482	2 (0 1 1 0 0)
protein tyrosine phosphatase, non-receptor type 6 isoform 2 [Homo sapi	0.00635212	14.0667	67677.2	18104991	2 (1 0 0 1 0)
envelope glycoprotein [Human immunodeficiency virus 1]	0.00290016	14.06	95660.2	86753469	2 (0 1 1 0 0)
NCK interacting protein with SH3 domain isoform 2 [Homo sapiens]	0.00461736	14.059	78187.9	37577148	2 (0 1 1 0 0)
unknown [Homo sapiens]	0.00467898	14.0534	67813.6	62702366	2 (1 0 0 1 0)
hypothetical protein LOC257169 [Homo sapiens]	0.0017944	14.046	52188.7	22749539	2 (0 1 1 0 0)
putative protein O-mannosyltransferase [Homo sapiens]	0.00334632	14.042	84159.8	32455271	2 (0 1 1 0 0)
tubulin, beta, 2 [Homo sapiens]	4.0232e-07	12.1616	49799	5174735	3 (1 0 2 0 0)
tenascin-R [Homo sapiens]	6.29999e-05	12.1492	149479	1617316	3 (2 0 0 0 1)
fiber protein [Human adenovirus type 6]	0.000313579	12.1392	55732.1	42407273	3 (0 2 0 1 0)
angiopoietin-like 7 [Homo sapiens]	0.00996974	12.1233	39992.7	10863949	2 (0 0 2 0 0)
KIAA0425 [Homo sapiens]	0.000671356	12.0996	141056	40788254	3 (1 1 0 0 1)
zinc finger, CDGSH-type domain 1 [Homo sapiens]	5.57339e-05	12.0955	12191.2	8923930	4 (3 0 0 0 1)
mitochondrial ribosomal protein L22 isoform a [Homo sapiens]	0.00440215	12.0951	23625.6	21265040	4 (0 0 1 1 2)
PYM protein [Homo sapiens]	0.00625822	12.0927	22628	23477161	3 (0 1 1 1 0)
U81 [Human herpesvirus 7]	0.00250375	12.0825	28987	51874301	2 (1 0 0 0 1)
hypothetical protein [Homo sapiens]	0.00941764	12.0751	66463.7	21739618	2 (0 1 0 1 0)
UBP24_HUMAN Ubiquitin carboxyl-terminal hydrolase 24 (Ubiquitin thioesterase	0.00576166	12.0684	210933	85681902	3 (1 0 1 0 1)
AF105369_1 actin-associated protein 2E4/kaptin [Homo sapiens]	0.00171953	12.0672	54800.3	5081380	2 (0 1 0 1 0)
arginyl-tRNA synthetase; ArgRS [Homo sapiens]	0.00435604	12.0664	74929.8	1217668	3 (1 0 0 1 1)
hCG1793591 [Homo sapiens]	0.00539355	12.066	17587.6	119593351	2 (1 0 0 0 1)
hypothetical protein [Homo sapiens]	0.00111383	12.0651	73052	21734051	3 (0 1 1 1 0)
integrin beta 4 [Homo sapiens]	0.00680268	12.0641	207485	6453380	2 (0 0 2 0 0)
phospholipase D1, phophatidylcholine-specific [Homo sapiens]	0.00523903	12.0616	124106	4505873	2 (1 0 0 0 1)
DNM3A_HUMAN DNA (cytosine-5)-methyltransferase 3A (Dnmt3a) (DNA methyltransfe	0.00815407	12.0595	101494	20532391	2 (1 0 0 0 1)
sortilin-related receptor containing LDLR class A repeats preproprotein	0.00835829	12.0583	248280	4507157	2 (0 1 0 1 0)
hypothetical protein DDBDRAFT_0217344 [Dictyostelium discoideum AX4]	0.00604692	12.058	45795.6	66822385	2 (1 0 0 0 1)
TFIIF (Transcription Factor II) largest subunit; involved in both trans	0.00660556	12.057	82144.1	6321625	2 (0 1 0 1 0)
unnamed protein product [Homo sapiens]	0.00654285	12.0567	55316.9	14042850	2 (1 0 0 0 1)
KIAA1286 protein [Homo sapiens]	0.000963311	12.0546	136513	6331389	2 (1 0 0 0 1)
histone H2A [Homo sapiens]	8.54175e-08	10.2708	13986.8	28195394	3 (3 0 0 0 0)
tubulin, alpha 1a [Mus musculus]	4.4137e-06	10.2339	49927.7	6678465	1 (1 0 0 0 0)
Chain , Calponin Homology (Ch) Domain From Human Beta-Spectrin	1.25766e-11	10.2314	12559.3	2914153	1 (1 0 0 0 0)
S100 calcium-binding protein, beta [Homo sapiens]	1.74033e-09	10.2195	10706	5454034	1 (1 0 0 0 0)
histone H2B [Homo sapiens]	1.6125e-07	10.215	13927.6	1568557	1 (1 0 0 0 0)
guanine nucleotide binding protein, alpha activating polypeptide O [Ho	0.000157072	10.1778	40024.9	10567816	2 (2 0 0 0 0)
beta actin [Homo sapiens]	1.13e-09	10.1767	41709.7	4501885	1 (1 0 0 0 0)
H2A histone family, member O [Homo sapiens]	8.79698e-06	10.1761	14086.9	4504251	2 (2 0 0 0 0)
fructose bisphosphate aldolase [Homo sapiens]	8.79157e-07	10.1734	39417.2	312137	1 (1 0 0 0 0)
calnexin precursor [Homo sapiens]	9.22017e-09	10.1647	67526	10716563	2 (2 0 0 0 0)
sarco/endoplasmic reticulum Ca2+ -ATPase [Homo sapiens]	1.91351e-06	10.1638	112442	3021396	1 (1 0 0 0 0)
AF471460_1 Ig heavy chain variable region, VH3 family [Homo sapiens] [MAS	0.000942282	10.1618	13217.3	33319464	1 (1 0 0 0 0)
H2A histone family, member A [Homo sapiens]	2.71266e-06	10.1579	14127	10645195	2 (1 1 0 0 0)
ENO1B_HUMAN Alpha-enolase, lung specific (2-phospho-D-glycerate hydro-lyase) (N	1.10934e-05	10.1574	49446.4	729422	2 (1 1 0 0 0)
catechol-O-methyltransferase isoform MB-COMT [Homo sapiens]	4.64451e-05	10.1564	30017.6	4502969	1 (1 0 0 0 0)
calmodulin [Homo sapiens]	0.000332178	10.1551	17152	825635	2 (2 0 0 0 0)
bridging integrator 1 isoform 1 [Homo sapiens]	0.00262336	10.1519	64659.6	21536400	2 (2 0 0 0 0)
Thy-1 cell surface antigen [Homo sapiens]	3.05519e-05	10.1499	17923.3	19923362	2 (2 0 0 0 0)
syntaxin 1B2 [Rattus norvegicus]	2.23352e-06	10.1489	33223.8	6981600	1 (1 0 0 0 0)
AF138453_1 envelope glycoprotein [Human immunodeficiency virus type 1] [MA	0.00192502	10.1475	22264.1	6958810	1 (1 0 0 0 0)
cytochrome c oxidase subunit VIIa polypeptide 2 (liver) precursor [Homo	0.0018097	10.1452	9390.1	4502989	1 (1 0 0 0 0)
FXYD domain-containing ion transport regulator 6 [Homo sapiens]	5.15717e-06	10.145	10535.4	11612655	2 (2 0 0 0 0)
synaptosomal-associated protein 25 [Mus musculus]	0.000160094	10.142	23300.2	6755588	2 (1 0 0 0 1)
DCTN2_HUMAN Dynactin subunit 2 (Dynactin complex 50 kDa subunit) (50 kDa dyne	7.43067e-06	10.1365	44203.9	22096346	1 (1 0 0 0 0)
AF166243_1 polyprotein [Human coxsackievirus A9]	0.00154023	10.1363	14608	6752609	1 (1 0 0 0 0)
Cytochrome c oxidase subunit Va [Homo sapiens]	0.000159391	10.1345	16751.7	18999392	2 (2 0 0 0 0)
gp120 [Human immunodeficiency virus 1]	0.00203868	10.1306	38115.2	28172510	2 (0 1 0 0 1)
heat shock 70kDa protein 2 [Homo sapiens]	1.3667e-06	10.1194	69978	13676857	1 (1 0 0 0 0)
immunoglobulin superfamily, member 8 [Homo sapiens]	0.000139812	10.119	64993.6	16445029	1 (1 0 0 0 0)
KIAA1379 protein [Homo sapiens]	4.27964e-05	10.1138	52337.5	20521900	1 (1 0 0 0 0)
A40671 dynamin, internal form 1, long C-terminal form - human [M	0.000200237	10.1131	97201	539580	1 (1 0 0 0 0)
TBB4Q_HUMAN Tubulin beta-4q chain	0.000452587	10.1128	48403.5	12643363	1 (1 0 0 0 0)
enolase 1 [Homo sapiens]	2.60924e-06	10.1127	47139.4	4503571	2 (1 1 0 0 0)
neurofilament, light polypeptide 68kDa, isoform CRA_b [Homo sapiens] [M	0.00121197	10.1121	56924	119584005	1 (1 0 0 0 0)
brain link protein-1 [Homo sapiens]	0.000324932	10.1103	37751.1	11141887	2 (2 0 0 0 0)
solute carrier family 17, member 7 [Homo sapiens]	5.78055e-05	10.1096	61573.3	9945322	3 (2 0 1 0 0)
A Chain A, Crystal Structure Of Constant Regulatory Domain Of Human Pp2a, Pr65a	0.00632641	10.1088	65136.1	4558258	1 (1 0 0 0 0)
unnamed protein product [Homo sapiens]	0.00887357	10.1065	15958.3	29446	1 (1 0 0 0 0)
BORF2 [Human herpesvirus 4 type 1]	0.000896566	10.1044	92970.9	82503213	1 (1 0 0 0 0)
NeshBP [Homo sapiens]	0.0064129	10.1037	53855.2	13111480	1 (1 0 0 0 0)
HSP71_HUMAN Heat shock 70 kDa protein 1 (HSP70.1) (HSP70-1/HSP70-2)	0.00156362	10.1014	70009.2	147744565	1 (1 0 0 0 0)
A Chain A, Kinetic Analysis Of Product Inhibition In Human Manganese Superoxid	0.000790556	10.1008	22075.2	14488599	2 (2 0 0 0 0)
E1 [Human papillomavirus type 16]	0.00633713	10.1006	72840.5	56462981	1 (1 0 0 0 0)
RAB3B, member RAS oncogene family [Homo sapiens]	0.000565591	10.1002	24742.1	19923750	1 (1 0 0 0 0)
ATP synthase, H+ transporting, mitochondrial F1 complex, beta subunit	2.1273e-05	10.0994	56524.7	32189394	3 (1 2 0 0 0)
ATPase, H+ transporting, lysosomal 50/57kDa, V1 subunit H isoform 2 [H	0.00012958	10.0988	55847.1	47717102	1 (1 0 0 0 0)
cell adhesion molecule 3 [Homo sapiens]	0.000140045	10.0983	46991.5	11056046	1 (1 0 0 0 0)
beta-tubulin [Homo sapiens]	0.00129516	10.0982	50485.3	1297274	1 (1 0 0 0 0)
solute carrier family 9 (sodium/hydrogen exchanger), isoform 3 regulato	0.00325469	10.0974	38844.6	4759140	1 (1 0 0 0 0)
GDAP1_HUMAN Ganglioside-induced differentiation-associated protein 1 (GDAP1)	0.00317608	10.0972	41225.8	38257679	1 (1 0 0 0 0)
unknown [Homo sapiens]	0.000493472	10.0968	7659.7	63991529	1 (1 0 0 0 0)
hypothetical protein [Homo sapiens]	0.00275094	10.0955	47524.3	21739836	1 (1 0 0 0 0)
A Chain A, Human Prion Protein	0.000724941	10.0948	22876.6	6730485	1 (1 0 0 0 0)
TPA: TPA_exp: keratin 5c [Homo sapiens]	0.000929244	10.0927	59333.4	27764565	1 (1 0 0 0 0)
reverse transcriptase [Human immunodeficiency virus 1]	0.00538181	10.0915	22563.8	67080330	2 (2 0 0 0 0)
HA21_HUMAN HLA class II histocompatibility antigen, DQ(1) alpha chain precursor	0.000489258	10.0904	28087.4	122184	1 (1 0 0 0 0)
U81842_1 Vpr protein [Human immunodeficiency virus type 2]	0.00282836	10.0902	11497.9	6648564	1 (1 0 0 0 0)
T-cell receptor beta chain [Homo sapiens]	0.00589925	10.0893	5123.53	4028333	1 (1 0 0 0 0)
chromosome 8 open reading frame 53, isoform CRA_c [Homo sapiens]	0.0054325	10.0892	12577.8	119612368	1 (1 0 0 0 0)
major capsid protein VP1 [Human enterovirus 70] [MAS	0.00721864	10.089	34002.2	563965	1 (1 0 0 0 0)
AF183419_1 GTP:AMP phosphotransferase [Homo sapiens]	0.00595639	10.0871	18180.6	9963777	1 (1 0 0 0 0)
heterogeneous nuclear ribonucleoprotein D-like [Homo sapiens]	0.00525901	10.087	46409	14110407	1 (1 0 0 0 0)
KIAA0821 protein [Homo sapiens]	0.00411861	10.0868	172156	40788373	1 (1 0 0 0 0)
A Chain A, Crystal Structure Of The Catalytic Domain Of Human Matrix Metallopr	0.00290557	10.0852	18507	47168608	5 (4 1 0 0 0)
gp120 [Human immunodeficiency virus 1]	0.000860874	10.0847	7897.05	9968273	1 (1 0 0 0 0)
hCG2001043 [Homo sapiens]	0.000605334	10.0844	7365.82	119604816	1 (1 0 0 0 0)
Chain , Human Rhoa Complexed With Gtp Analogue	0.00873798	10.0837	20557.3	3318980	1 (1 0 0 0 0)
reverse transcriptase [Human immunodeficiency virus 1]	0.00382931	10.0829	24456.5	71844214	1 (1 0 0 0 0)
envelope glycoprotein [Human immunodeficiency virus 1]	0.00527709	10.0822	96579.4	62997579	1 (1 0 0 0 0)
ubiquinol-cytochrome c reductase binding protein [Homo sapiens]	4.98048e-05	10.0819	13522	5454152	1 (1 0 0 0 0)
hypothetical protein LOC54967 isoform 1 [Homo sapiens]	0.00130891	10.0812	29033.8	72534700	1 (1 0 0 0 0)
Vif protein [Human immunodeficiency virus 1]	0.0056192	10.0808	22661.8	7416634	1 (1 0 0 0 0)
carnitine O-octanoyltransferase [Homo sapiens]	0.00623519	10.0802	70133.4	31542325	2 (2 0 0 0 0)
hypothetical protein LOC644815 [Homo sapiens]	0.00768716	10.0802	90778.9	115392150	1 (1 0 0 0 0)
hCG1750237, isoform CRA_a [Homo sapiens]	0.0024503	10.0793	7092.87	119581276	1 (1 0 0 0 0)
chordin-like 2, isoform CRA_a [Homo sapiens]	0.00766862	10.0793	11657.7	119595350	4 (1 2 0 0 1)
ADP-ribosylation factor 3 [Homo sapiens]	0.00739301	10.0792	20587.7	4502203	1 (1 0 0 0 0)
KIAA0968 protein [Homo sapiens]	0.00349075	10.0787	58985.2	4589580	3 (3 0 0 0 0)
N Chain N, Mutant Monomer Of Recombinant Human Hexokinase Type I Complexed With	0.000238732	10.0783	102383	7245424	2 (0 1 0 0 1)
gag protein [Human immunodeficiency virus type 1] [M	0.00721923	10.0775	10927.4	2587199	1 (1 0 0 0 0)
period homolog 3 (Drosophila), isoform CRA_c [Homo sapiens]	0.00660107	10.0772	129087	119591991	1 (1 0 0 0 0)
pol protein [Human immunodeficiency virus 1]	0.00969674	10.0768	10518.2	116272820	1 (1 0 0 0 0)
tyrosine 3/tryptophan 5 -monooxygenase activation protein, theta polype	0.00148262	10.0761	27746.8	5803227	1 (1 0 0 0 0)
MARCS_HUMAN Myristoylated alanine-rich C-kinase substrate (MARCKS) (Protein k	0.000991476	10.0754	31535.9	76803798	1 (1 0 0 0 0)
RM37_HUMAN 39S ribosomal protein L37, mitochondrial precursor (L37mt) (MRP-L3	0.000155767	10.0751	48071.2	74717744	2 (0 0 1 1 0)
major capsid protein [Human papillomavirus]	0.00517428	10.075	16398.4	28864503	1 (1 0 0 0 0)
envelope glycoprotein [Human immunodeficiency virus 1]	0.00492494	10.0746	51274.1	61106080	1 (1 0 0 0 0)
ubiquitin carboxyl-terminal esterase L1 (ubiquitin thiolesterase) [Hom	7.55978e-05	10.0745	24808.5	21361091	1 (1 0 0 0 0)
VE1_HPV15 Replication protein E1 (ATP-dependent helicase E1)	0.00223669	10.074	69621.5	549219	1 (1 0 0 0 0)
envelope glycoprotein [Human immunodeficiency virus 1]	0.00644994	10.0737	22216.1	45826765	2 (2 0 0 0 0)
gag protein [Human immunodeficiency virus 1]	0.0083498	10.0727	54823.9	55416337	3 (1 0 2 0 0)
SYN2_HUMAN Synapsin-2 (Synapsin II)	0.00404055	10.0723	62928.8	6686022	1 (1 0 0 0 0)
unnamed protein product [Homo sapiens]	0.000307424	10.0713	63225.6	34530319	1 (1 0 0 0 0)
pol protein [Human immunodeficiency virus 1]	0.00629609	10.0711	57106	42716792	1 (1 0 0 0 0)
polyprotein [Human coxsackievirus B5]	0.0029793	10.071	243277	58372546	1 (1 0 0 0 0)
immunoglobulin variable region [Homo sapiens]	2.87801e-05	10.0701	13203.5	1685225	1 (1 0 0 0 0)
transmembrane protein 88, isoform CRA_b [Homo sapiens]	0.00619982	10.0701	22870.6	119610531	1 (1 0 0 0 0)
retinitis pigmentosa 1 homolog [Mus musculus]	0.00715092	10.0693	234240	33468923	3 (0 0 0 2 1)
KIAA1267 protein [Homo sapiens]	0.00955507	10.0686	120908	6331206	3 (0 0 0 2 1)
immunoglobulin heavy chain VHDJ region [Homo sapiens]	0.00553787	10.0684	12361	21670021	1 (1 0 0 0 0)
gag protein [Human immunodeficiency virus 2]	0.00892559	10.0682	13459.7	3204225	1 (1 0 0 0 0)
Chain , Aldolase A (E.C.4.1.2.13)	0.0096932	10.0676	39264.3	229674	1 (1 0 0 0 0)
coiled-coil domain containing 89 [Homo sapiens]	0.00243496	10.0671	43781.6	22749429	3 (0 0 1 2 0)
hypothetical protein [Homo sapiens]	0.00952855	10.0669	12318.2	51476466	3 (2 0 0 1 0)
STX7_HUMAN Syntaxin-7	0.00123528	10.0667	29797.3	20532414	1 (1 0 0 0 0)
envelope glycoprotein [Human immunodeficiency virus 1]	0.00162458	10.0665	13201	54660185	1 (1 0 0 0 0)
ATP synthase, H+ transporting, mitochondrial F1 complex, delta subunit	0.0058346	10.0658	17479.2	4502297	2 (2 0 0 0 0)
reverse transcriptase [Human immunodeficiency virus 1]	0.00315984	10.0655	27390.3	12666786	1 (1 0 0 0 0)
EPB41L3 protein [Homo sapiens]	0.00837078	10.0644	96454.3	13544009	1 (1 0 0 0 0)
E1B 19K [Human adenovirus E]	0.00342466	10.0641	19995	51527266	1 (1 0 0 0 0)
catenin, alpha 1 [Homo sapiens]	0.00701358	10.064	100009	55770844	3 (0 0 1 2 0)
ADT3_HUMAN ADP/ATP translocase 3 (Adenine nucleotide translocator 2) (ANT 3) (A	0.000210966	10.0638	32845.2	113463	1 (1 0 0 0 0)
SECIS binding protein 2 [Homo sapiens]	0.00358544	10.0634	30473.8	57209759	1 (1 0 0 0 0)
ribosomal protein L10a [Rattus norvegicus]	0.00456686	10.063	24815.5	13592009	1 (1 0 0 0 0)
envelope glycoprotein [Human immunodeficiency virus 1]	0.00331374	10.0628	20300.4	52695163	1 (1 0 0 0 0)
zinc finger and BTB domain containing 22 [Homo sapiens]	0.00859697	10.0619	65531.1	20070224	1 (1 0 0 0 0)
AFG3 ATPase family gene 3-like 2 [Homo sapiens]	0.00190782	10.0617	88428.2	5802970	1 (1 0 0 0 0)
alkyldihydroxyacetone phosphate synthase precursor [Homo sapiens]	0.0021498	10.0615	72865.9	4501993	1 (1 0 0 0 0)
chromatin modifying protein 4A [Homo sapiens]	0.00988265	10.0614	29785.3	40548422	1 (1 0 0 0 0)
basigin isoform 1 [Homo sapiens]	0.000901465	10.0612	42174.1	38372919	1 (1 0 0 0 0)
guanine nucleotide binding protein (G protein), gamma 3 subunit [Mus mu	0.000666667	10.0609	8299.16	6754022	1 (1 0 0 0 0)
serine hydroxymethyltransferase 2 (mitochondrial), isoform CRA_a [Homo	0.00489245	10.0608	27116.1	119617399	2 (1 0 1 0 0)
SUCB2_HUMAN Succinyl-CoA ligase [GDP-forming] beta-chain, mitochondrial precu	0.00686156	10.0608	46481.5	52788292	2 (0 1 0 0 1)
gp160 [Human immunodeficiency virus 1]	0.000159281	10.0608	99216.5	14041633	1 (1 0 0 0 0)
envelope glycoprotein [Human immunodeficiency virus 1]	0.0074119	10.0608	96708.3	54124766	1 (1 0 0 0 0)
unnamed protein product [Homo sapiens]	0.00428292	10.0607	18116.1	10438496	1 (1 0 0 0 0)
envelope glycoprotein [Human immunodeficiency virus type 1]	0.00180942	10.0598	10432.4	2108368	1 (1 0 0 0 0)
heat shock 70kDa protein 14 isoform 1 [Homo sapiens]	0.0027391	10.0593	54760.2	82880658	1 (1 0 0 0 0)
dendrin [Homo sapiens]	0.0044768	10.0592	69869.8	62079299	1 (1 0 0 0 0)
zinc finger 298 [Homo sapiens]	0.00673165	10.0589	169096	21617878	2 (0 1 0 0 1)
recombining binding protein suppressor of hairless isoform 3 [Homo sap	0.00719248	10.0588	54110.9	42560225	1 (1 0 0 0 0)
envelope glycoprotein [Human immunodeficiency virus type 1]	0.00286625	10.0577	22400.1	2290130	1 (1 0 0 0 0)
polyprotein [Human rhinovirus 78]	0.00792567	10.0577	51812.2	39655155	2 (0 0 1 1 0)
immunoglobulin heavy chain CDR3 [Homo sapiens] [MAS	0.00990549	10.0567	12527	46811763	1 (1 0 0 0 0)
KIAA1734 protein [Homo sapiens]	0.00219291	10.0565	143387	12698013	1 (1 0 0 0 0)
circulating B cell antibody heavy chain variable region [Homo sapiens]	0.00442082	10.0563	12926.3	106898156	2 (1 0 0 0 1)
G protein-coupled receptor 89B [Homo sapiens]	0.00598591	10.0563	52882	7706704	1 (1 0 0 0 0)
envelope glycoprotein [Human immunodeficiency virus 1]	0.00435742	10.0559	26280.1	108736530	1 (1 0 0 0 0)
immunoglobulin alpha heavy chain variable region [Homo sapiens]	0.00856807	10.0559	11933.5	13378194	1 (1 0 0 0 0)
AF155803_1 DEAD-box corepressor DP103 [Homo sapiens]	0.000482008	10.0553	92162.5	14209614	1 (1 0 0 0 0)
sorting nexin 1 isoform a [Homo sapiens]	0.0032102	10.0553	59033.2	23111034	1 (1 0 0 0 0)
IRS-1 PH domain binding protein PHIP variant 9 [Homo sapiens]	0.000239824	10.0545	98646.4	12007334	1 (1 0 0 0 0)
unnamed protein product [Homo sapiens]	0.00547251	10.0541	90297.1	10434406	1 (1 0 0 0 0)
growth associated protein 43 [Homo sapiens]	0.0082004	10.0541	24787.9	4503911	1 (1 0 0 0 0)
protein O-fucosyltransferase 2 isoform A [Homo sapiens]	0.00357105	10.0527	48864.8	13273311	1 (1 0 0 0 0)
glycosyltransferase 8 domain containing 1 [Homo sapiens]	0.00330669	10.0527	41909	8923855	1 (1 0 0 0 0)
immunoglobulin heavy chain variable region [Homo sapiens]	0.00170144	10.0522	14419.1	39939601	2 (2 0 0 0 0)
LEM domain containing 2 [Homo sapiens]	0.00124814	10.0511	56939.6	31044432	1 (1 0 0 0 0)
angiopoietin-like 3 precursor [Homo sapiens]	0.00960611	10.0504	53604.2	7656888	1 (1 0 0 0 0)
envelope glycoprotein [Human immunodeficiency virus type 1]	0.000951977	10.0488	13479.1	8071760	1 (1 0 0 0 0)
membrane associated guanylate kinase, WW and PDZ domain containing 2 [	0.00266116	10.0477	158655	27436957	1 (1 0 0 0 0)
gp120 protein [Human immunodeficiency virus 1] [MA	0.00750392	10.0469	19238.6	34786362	1 (1 0 0 0 0)
unnamed protein product [Homo sapiens]	0.0028726	10.0462	24982.8	34529889	1 (1 0 0 0 0)
G [Human respiratory syncytial virus]	0.000300001	10.0462	32848.2	584042	1 (1 0 0 0 0)
HSP70-HOM [Homo sapiens]	0.0010819	10.0461	70361.4	4529894	1 (1 0 0 0 0)
gag protein [Human immunodeficiency virus type 1] [	0.00354865	10.0459	14605.4	14573071	2 (0 0 1 1 0)
hypothetical protein [Homo sapiens]	0.0068331	10.0459	88487	21740291	1 (1 0 0 0 0)
gag protein [Human immunodeficiency virus type 1] [	0.00279409	10.0442	14293.5	19423591	3 (2 0 1 0 0)
dopachrome tautomerase	0.00521002	10.0413	11087.4	1050251	1 (1 0 0 0 0)
gp160 [Human immunodeficiency virus 1]	0.00208888	10.0383	96488.6	18996232	1 (1 0 0 0 0)
exosome component 9 isoform 1 [Homo sapiens]	0.00484504	10.0347	50771.1	77812672	1 (1 0 0 0 0)
hypothetical protein [Homo sapiens]	0.00150694	10.0301	112604	5262601	2 (1 0 0 0 1)
gag protein [Human immunodeficiency virus 1]	0.0023218	8.18342	55119.2	90812182	2 (0 2 0 0 0)
unnamed protein product [Homo sapiens]	0.00571876	8.15669	55559.6	10438086	3 (1 2 0 0 0)
Gag [Human immunodeficiency virus 1]	0.00323389	8.14161	55827.4	119507370	4 (0 4 0 0 0)
B Chain B, Crystal Structure Of Human Hemoglobin E At 1.73 A Resolution	0.000609756	8.14117	15856.3	46014946	1 (0 1 0 0 0)
S31503 H+/K+-exchanging ATPase (EC 3.6.3.10) ATP1AL1 - human (fragment)	0.00208279	8.13766	10485.2	346261	4 (1 2 0 1 0)
unnamed protein product [Homo sapiens]	0.00555536	8.13647	50621.8	10435466	3 (1 1 0 1 0)
S-phase kinase-associated protein 1A isoform b [Homo sapiens]	0.00533435	8.13202	18646.2	25777713	1 (0 1 0 0 0)
hypothetical protein [Human calicivirus Hu/NLV/Queen's Arms/Leeds/92/UK	0.00267569	8.12601	22089.1	14330431	2 (0 2 0 0 0)
unnamed protein product [Homo sapiens]	0.000112865	8.12059	40160.7	21757106	2 (0 1 1 0 0)
hypothetical protein LOC345651 [Homo sapiens]	0.00037917	8.1176	41976	63055057	2 (0 2 0 0 0)
hypothetical protein DDBDRAFT_0167566 [Dictyostelium discoideum AX4]	0.00199426	8.11622	50433	66821635	3 (0 1 2 0 0)
AF166179_1 polyprotein [Human coxsackievirus A9] [MAS	0.00465348	8.1139	14925.1	6752481	2 (0 1 1 0 0)
gag protein [Human immunodeficiency virus 1]	0.00166026	8.11264	52119.5	124299488	1 (0 1 0 0 0)
lipin 3 [Homo sapiens]	0.00268116	8.10996	93556.5	74271888	3 (0 2 0 0 1)
Na,K-ATPase catalytic subunit alpha-A protein [Homo sapiens]	0.00102957	8.10946	3563.7	5919228	1 (0 1 0 0 0)
immunoglobulin alpha heavy chain variable region [Homo sapiens]	0.00503942	8.10581	14011.9	62871218	3 (2 1 0 0 0)
FABP7 [Homo sapiens]	0.00640683	8.10345	14907.5	48146231	4 (2 1 0 1 0)
KIAA1376 protein [Homo sapiens]	0.00947397	8.10326	49219.9	7243133	2 (0 0 1 0 1)
UL120 [Human herpesvirus 5 strain Merlin]	0.00930329	8.10256	23119.5	52139284	1 (0 1 0 0 0)
envelope glycoprotein [Human immunodeficiency virus type 1]	0.00266476	8.09986	12969.5	1835549	2 (0 0 0 2 0)
gp120 [Human immunodeficiency virus 1]	0.00452758	8.09843	9776.11	9968017	1 (0 1 0 0 0)
neural proliferation, differentiation and control, 1 [Homo sapiens] [MA	0.00161383	8.09652	42723.5	55962688	1 (0 1 0 0 0)
prestin isoform a [Homo sapiens]	0.00721784	8.09615	81211.8	39752683	1 (0 1 0 0 0)
epimorphin [Homo sapiens]	0.000684631	8.0959	34621.8	303605	1 (0 1 0 0 0)
KIAA0546 protein [Homo sapiens]	0.00456815	8.09544	218194	29421174	2 (0 0 1 0 1)
collapsin response mediator protein 1 isoform 2 [Homo sapiens]	0.00876759	8.09527	62144.8	4503051	3 (1 2 0 0 0)
UTRO_HUMAN Utrophin (Dystrophin-related protein 1) (DRP1) (DRP)	0.000208793	8.09349	394247	1174915	2 (0 0 0 2 0)
cerebral protein-12 [Homo sapiens]	0.0056197	8.09215	91105.2	13874433	1 (0 1 0 0 0)
Ig light chain [Homo sapiens]	0.00102962	8.09208	13057.4	2738303	1 (0 1 0 0 0)
similar to NM_031954 MSTP028 protein in Homo sapiens [Schistosoma japoni	0.00145917	8.09157	38879.5	29840923	2 (0 1 1 0 0)
unnamed protein product [Homo sapiens]	0.000104194	8.09062	18229.3	21756953	1 (0 1 0 0 0)
MLL3_HUMAN Myeloid/lymphoid or mixed-lineage leukemia protein 3 homolog (Hist	0.0028121	8.09028	540966	37999866	1 (0 1 0 0 0)
small nuclear RNA activating complex, polypeptide 4, 190kDa [Homo sapi	0.00913426	8.08702	159335	92859678	4 (2 2 0 0 0)
L1 protein [Human papillomavirus type 75]	0.00470917	8.08626	57220.6	2911550	1 (0 1 0 0 0)
endothelin-converting enzyme, isoform ECE-1a [Homo sapiens]	0.000454275	8.08593	85753.9	1177448	2 (0 0 1 0 1)
complement component 7 precursor [Homo sapiens]	0.000147717	8.08589	93457.3	45580688	1 (0 1 0 0 0)
reverse transcriptase [Human immunodeficiency virus 1]	0.000174452	8.0858	24550.7	71844956	1 (0 1 0 0 0)
envelope glycoprotein [Human immunodeficiency virus type 1]	0.00557023	8.0847	10085.3	9887298	2 (0 1 1 0 0)
unnamed protein product [Homo sapiens]	0.00334937	8.07952	23535.8	34534054	1 (0 1 0 0 0)
gp120 [Human immunodeficiency virus type 1]	0.00417208	8.07944	23993.1	4071156	1 (0 1 0 0 0)
envelope glycoprotein [Human immunodeficiency virus 1]	0.00173322	8.0789	45944.9	51832545	1 (0 1 0 0 0)
similar to BC001656 unknown (protein for MGC:2615) in Homo sapiens [Schi	0.00230256	8.07865	27571.6	29841268	1 (0 1 0 0 0)
hCG1650665 [Homo sapiens]	0.00857485	8.07743	24717.9	119584730	1 (0 1 0 0 0)
ras homolog gene family, member B [Homo sapiens]	0.00873798	8.07521	22109.1	4757764	1 (0 1 0 0 0)
AF344773_1 vpu protein [Human immunodeficiency virus type 1]	0.00940208	8.07469	9297.12	13487595	1 (0 1 0 0 0)
envelope glycoprotein [Human immunodeficiency virus 1]	0.00385454	8.074	96370.3	83854089	1 (0 1 0 0 0)
envelope glycoprotein [Human immunodeficiency virus 1]	0.00644994	8.07367	22429.2	45826769	2 (0 2 0 0 0)
hCG2042088 [Homo sapiens]	0.00655711	8.07271	13788	119584841	1 (0 1 0 0 0)
DR4 [Human herpesvirus 6A]	0.00883707	8.07241	10554.5	9628295	1 (0 1 0 0 0)
AF361879_8 envelope glycoprotein [Human immunodeficiency virus type 1] [M	0.0015106	8.0681	97370.6	15281506	2 (0 0 1 0 1)
VE1_HPV17 Replication protein E1 (ATP-dependent helicase E1)	0.00793793	8.06784	70433.1	549220	2 (0 0 1 0 1)
beta globin chain variant [Homo sapiens]	0.00266818	8.06769	15987.3	26892090	2 (0 1 0 1 0)
mutant desmin [Homo sapiens]	0.00893222	8.06722	53502.3	3411134	1 (0 1 0 0 0)
gag protein [Human immunodeficiency virus 1]	0.00662549	8.06629	14815.6	80975372	1 (0 1 0 0 0)
envelope glycoprotein; gp120 [Human immunodeficiency virus 1]	0.00489027	8.06619	22382	18535994	1 (0 1 0 0 0)
envelope glycoprotein [Human immunodeficiency virus type 1]	0.00833812	8.06461	96794.6	17046599	1 (0 1 0 0 0)
junctional adhesion molecule 3 precursor [Homo sapiens]	0.00990912	8.06451	39577.3	21361905	1 (0 1 0 0 0)
VL1_HPV27 Major capsid protein L1	0.00172166	8.06419	67055.2	549338	1 (0 1 0 0 0)
capsid protein VP1 [Human echovirus 12]	0.00675401	8.06132	15841.9	9716544	1 (0 1 0 0 0)
envelope protein [Human immunodeficiency virus 1]	0.00890067	8.05989	95064.9	11124719	1 (0 1 0 0 0)
envelope glycoprotein [Human immunodeficiency virus type 1]	0.00148004	8.05978	7423.05	2585386	1 (0 1 0 0 0)
envelope polyprotein [Human immunodeficiency virus type 1]	0.0074119	8.05954	95644.3	2570309	1 (0 1 0 0 0)
CGI58 protein [Homo sapiens]	0.000601879	8.05938	39070.7	31542303	2 (0 0 0 2 0)
zinc finger, CW type with coiled-coil domain 2 isoform a [Homo sapien	0.00377773	8.05913	106281	145553976	1 (0 1 0 0 0)
T cell receptor delta chain [Homo sapiens]	0.00141299	8.05849	2667.24	2853699	1 (0 1 0 0 0)
muscleblind-like 2 isoform 1 [Homo sapiens]	0.00273766	8.05847	39308.9	21464125	1 (0 1 0 0 0)
AF484508_7 truncated envelope glycoprotein [Human immunodeficiency virus	0.00633544	8.0584	9647.93	25166937	1 (0 1 0 0 0)
AF305429_1 apolipoprotein L2 [Homo sapiens]	0.00805084	8.05702	37055.4	15824473	1 (0 1 0 0 0)
C protein [Human parainfluenza virus 3]	0.00704122	8.0568	23391.5	19551239	1 (0 1 0 0 0)
Functional ortholog of human PIG-V, which is a mannosyltransferase that	0.00596532	8.05401	50739.8	6319476	1 (0 1 0 0 0)
envelope glycoprotein [Human immunodeficiency virus type 1]	0.0042285	8.05387	45530	2290140	1 (0 1 0 0 0)
CU090_HUMAN Uncharacterized protein C21orf90	0.00273035	8.0531	7092.64	25089983	2 (0 0 0 2 0)
olfactory receptor, family 5, subfamily M, member 1 [Homo sapiens]	0.000983297	8.05295	35584.2	52317124	1 (0 1 0 0 0)
serine/threonine protein kinase [Homo sapiens]	0.00752973	8.05285	52972.1	599827	1 (0 1 0 0 0)
KIAA1266 protein [Homo sapiens]	0.00382215	8.0523	68333.6	6331199	2 (0 0 0 2 0)
human HCF1 related family member (hcf-1) [Caenorhabditis elegans]	0.00868478	8.05185	87304.9	17539228	1 (0 1 0 0 0)
VP1 capsid protein [Human echovirus 11]	0.0051237	8.05006	21352.6	111036322	1 (0 1 0 0 0)
ribonuclease, RNase A family, 10 (non-active) [Homo sapiens]	0.00110551	8.04964	23992.8	61175227	1 (0 1 0 0 0)
Rho GTPase activating protein [Homo sapiens]	0.00497872	8.04784	24988	25396407	1 (0 1 0 0 0)
BAI1-associated protein 1 [Homo sapiens]	0.00266116	8.04771	136896	3370998	1 (0 1 0 0 0)
attachment protein [Human respiratory syncytial virus]	0.000300001	8.04619	32614	3641268	1 (0 1 0 0 0)
hCG1651398 [Homo sapiens]	0.00473095	8.04384	14505.2	119608945	1 (0 1 0 0 0)
envelope glycoprotein [Human immunodeficiency virus 1]	0.00288254	8.04174	12656.4	57545188	1 (0 1 0 0 0)
AF484484_1 rev protein [Human immunodeficiency virus 1]	0.0055516	8.0394	14042.5	25166699	1 (0 1 0 0 0)
VE1_HPV14 Replication protein E1 (ATP-dependent helicase E1)	0.00649803	6.14281	69258.1	549218	2 (1 0 1 0 0)
actin-like protein [Homo sapiens]	1.78574e-07	6.08847	11528.9	62421162	3 (0 1 1 1 0)
nebulette sarcomeric isoform [Homo sapiens]	0.00371483	6.0802	116380	5453758	3 (0 0 1 1 1)
hypothetical protein [Homo sapiens]	0.00712693	6.07379	125009	60219476	3 (1 0 0 1 1)
human BACH helicase related family member (bch-1) [Caenorhabditis eleg	0.00960817	6.06776	112873	17506821	2 (0 0 0 1 1)
beclin 1 (coiled-coil, myosin-like BCL2 interacting protein), isoform C	0.00791216	6.04957	16241.3	119581292	2 (0 0 0 1 1)
musashi 2 isoform b [Homo sapiens]	0.000903156	6.04538	28402	25121993	2 (0 0 0 1 1)
unnamed protein product [Homo sapiens]	0.00418782	6.03702	127878	10436735	2 (0 0 0 1 1)
AF391861_1 VP1 [Human echovirus 30]	0.00927126	4.08985	15920.8	20530360	2 (0 1 0 1 0)
A-kinase anchor protein 11 [Homo sapiens]	0.00383174	4.07885	210379	7706457	2 (0 0 0 0 2)
ADIP_HUMAN Afadin- and alpha-actinin-binding protein (ADIP) (Afadin DIL domai	0.00117922	4.06483	71191.5	54035738	2 (0 0 0 0 2)
hCG2045706 [Homo sapiens]	0.00765181	4.06187	5849.83	119622608	2 (1 0 0 1 0)
unnamed protein product [Homo sapiens]	0.00444926	4.04729	88408.1	22760637	2 (0 0 0 0 2)
ribosomal protein L7-like 1 [Homo sapiens]	0.00333122	4.04155	28643.1	50053872	2 (0 0 0 0 2)
RM09_HUMAN 39S ribosomal protein L9, mitochondrial precursor (L9mt) (MRP-L9)	0.00979754	4.03849	30166.4	17865554	3 (1 0 0 0 2)
U67 [Human herpesvirus 7]	0.000892852	2.11843	38717.1	51874289	3 (1 0 0 1 1)
similar to t-complex 1; T-complex locus TCP-1; t-complex 1 (a murine tcp	0.00639146	2.07632	19812.7	51094756	4 (0 3 0 0 1)

## Sheet: Control_2_RIPA
Description	P-value	Score	MW	Accession	Peptide (Hits)
I38369 beta-tubulin - human (fragment)	8.20259e-15	88.2733	48848.5	2119276	16 (13 3 0 0 0)
ATP synthase, H+ transporting, mitochondrial F1 complex, alpha subunit	1.38645e-11	80.1982	59713.7	4757810	8 (8 0 0 0 0)
tubulin, beta 4 [Homo sapiens]	7.63249e-07	78.2302	49553.9	21361322	16 (12 3 1 0 0)
2',3'-cyclic-nucleotide 3'-phosphodiesterase (EC 3.1.4.37)	7.51595e-10	66.2843	45070.4	180687	10 (9 0 1 0 0)
myelin basic protein isoform 1 [Homo sapiens]	1.53795e-06	64.1871	21480	68509930	18 (14 2 1 1 0)
Na+/K+ -ATPase alpha 1 subunit isoform a proprotein [Homo sapiens]	2.50632e-07	60.1685	112824	21361181	7 (5 1 0 0 1)
Na+/K+ -ATPase alpha 2 subunit proprotein [Homo sapiens]	2.59746e-07	60.1334	112194	4502271	11 (11 0 0 0 0)
neurofilament, light polypeptide 68kDa [Homo sapiens]	4.16571e-06	58.1876	61479.3	105990539	6 (5 1 0 0 0)
Na+/K+ -ATPase beta 1 subunit isoform a [Homo sapiens]	3.67951e-05	58.1483	35038.9	4502277	10 (9 1 0 0 0)
unnamed protein product [Homo sapiens]	1.03045e-06	58.1291	57919.5	28940	7 (6 1 0 0 0)
tubulin alpha 6 [Homo sapiens]	8.60583e-07	56.2191	49863.5	14389309	11 (7 1 2 1 0)
neurofilament, medium polypeptide 150kDa [Homo sapiens]	1.15225e-08	52.1978	102386	4885513	9 (8 0 0 0 1)
Na+,K+ ATPase [Homo sapiens]	5.16738e-08	48.1638	111901	1359715	9 (8 1 0 0 0)
tubulin, beta, 4 [Homo sapiens]	5.53896e-08	46.1391	50400.3	50592996	9 (1 4 4 0 0)
SPTAN1 protein [Homo sapiens]	0.00376776	44.0721	282106	31565122	5 (2 3 0 0 0)
GNAO2_HUMAN Guanine nucleotide-binding protein G(o) subunit alpha 2	3.69898e-06	42.1529	40061.1	60416433	8 (7 0 0 0 1)
glyceraldehyde-3-phosphate dehydrogenase [Homo sapiens]	4.83147e-11	40.2321	36030.4	7669492	7 (7 0 0 0 0)
proteolipid protein [Rattus norvegicus]	3.97269e-07	40.1951	30057.1	13591880	24 (19 2 2 0 1)
dihydropyrimidinase-like 2 [Homo sapiens]	1.64723e-07	40.1568	62254.7	4503377	9 (8 0 1 0 0)
A Chain A, Crystal Structure Of A DictyosteliumTETRAHYMENA CHIMERA Actin (Mutan	1.69154e-10	38.2151	41719.9	7245526	8 (6 2 0 0 0)
enolase 2 [Homo sapiens]	0.000117856	38.1275	47239.1	5803011	4 (3 1 0 0 0)
ATRB actin, skeletal muscle - rabbit	0.000522719	36.2292	41789.8	71611	9 (7 2 0 0 0)
unknown [Homo sapiens]	1.94238e-10	36.223	268547	62988842	5 (3 0 0 1 1)
syntaxin binding protein 1 isoform a [Homo sapiens]	1.49942e-07	36.147	68692.3	4507297	5 (4 0 1 0 0)
synaptotagmin I [Homo sapiens]	0.000105648	32.1668	47542.8	5032139	4 (3 0 0 0 1)
AT2B4_HUMAN Plasma membrane calcium-transporting ATPase 4 (PMCA4) (Plasma mem	0.000595355	32.1231	137833	14286105	4 (2 1 0 1 0)
brain creatine kinase [Homo sapiens]	1.39206e-07	30.2221	42617.4	21536286	5 (5 0 0 0 0)
Chain , Cdc42 From Human, Nmr, 20 Structures	0.000285374	30.1648	21473.2	2624582	3 (3 0 0 0 0)
tubulin, alpha 1B [Mus musculus]	6.92793e-05	30.1396	50119.6	34740335	4 (4 0 0 0 0)
Chain , Aldolase A (E.C.4.1.2.13)	0.000106214	30.1271	39264.3	229674	3 (3 0 0 0 0)
glial fibrillary acidic protein [Homo sapiens]	5.06773e-05	30.1069	49849.7	4503979	4 (3 0 1 0 0)
MDHM_HUMAN Malate dehydrogenase, mitochondrial precursor	1.54693e-09	28.2468	35508.8	6648067	4 (3 1 0 0 0)
polyprotein [Human coxsackievirus A11]	0.00666679	28.061	246172	33304553	4 (1 1 1 1 0)
integrin alpha M precursor [Homo sapiens]	0.000509855	26.0872	127099	88501734	3 (2 0 1 0 0)
SH3-domain GRB2-like 2 [Homo sapiens]	3.09127e-06	26.086	39937.1	4506931	4 (2 0 2 0 0)
KIAA0856 protein [Homo sapiens]	0.00952452	26.0665	250097	20521676	4 (1 1 1 0 1)
p532 [Homo sapiens]	0.0073231	26.0595	531849	1477565	5 (0 2 0 2 1)
KIAA0460 protein [Homo sapiens]	0.00168272	24.0783	155278	20521059	3 (2 0 0 1 0)
visinin-like 1 [Mus musculus]	1.7332e-08	22.1891	22128	6755983	5 (4 0 0 0 1)
A-kinase anchor protein 9 isoform 2 [Homo sapiens]	0.00535703	22.0663	452707	22538387	3 (2 0 0 0 1)
KIAA1125 protein [Homo sapiens]	0.00783209	22.0513	133697	6329749	4 (1 0 2 1 0)
A Chain A, Crystal Structure Of Caenorhabditis Elegans Mg-Atp Actin Complexed	2.28433e-09	20.284	41637.7	14278147	2 (2 0 0 0 0)
tubulin polymerization promoting protein [Homo sapiens]	5.5481e-09	20.1952	23679.2	5902018	2 (2 0 0 0 0)
A Chain A, Crystal Structure Of Human Cd81 Extracellular Domain, A Receptor Fo	4.1716e-06	20.1795	9898.87	13399775	2 (2 0 0 0 0)
solute carrier family 25 (mitochondrial carrier; adenine nucleotide tr	3.65621e-07	20.1343	33043.2	55749577	3 (3 0 0 0 0)
syntaxin 1A (brain) [Homo sapiens]	0.000100304	20.1163	33002.7	4759182	2 (2 0 0 0 0)
heavy neurofilament subunit [Homo sapiens]	8.55388e-05	20.1071	111713	1841430	3 (3 0 0 0 0)
gelsolin isoform a precursor [Homo sapiens]	0.000162333	20.1007	85644.2	4504165	3 (3 0 0 0 0)
brain abundant, membrane attached signal protein 1 [Homo sapiens]	0.00223934	20.0992	22680	30795231	3 (3 0 0 0 0)
zinc finger protein, multitype 2 [Homo sapiens]	0.0098153	20.0631	128061	6912370	2 (2 0 0 0 0)
large tegument protein [Human herpesvirus 6B]	0.00276609	20.0595	240059	4996019	5 (1 0 1 2 1)
hypothetical protein LOC555788 [Danio rerio]	0.00353559	20.0525	117756	71834354	2 (2 0 0 0 0)
crystallin, alpha B [Homo sapiens]	0.00036419	18.1593	20146.4	4503057	4 (3 1 0 0 0)
KIAA0968 protein [Homo sapiens]	6.00844e-06	18.1183	58985.2	4589580	2 (1 1 0 0 0)
PYRIN-containing APAF1-like protein 7 isoform 2 [Homo sapiens]	0.00819796	18.1063	120095	21955154	2 (1 1 0 0 0)
UDP glycosyltransferase 3 family, polypeptide A1 [Homo sapiens]	0.00639832	18.1013	59113	46250396	2 (1 1 0 0 0)
synaptophysin [Homo sapiens]	0.00080789	18.0925	32083.5	899301	2 (1 1 0 0 0)
matrix metalloproteinase 12 preproprotein [Homo sapiens]	0.0099785	18.0582	53967.2	73858572	6 (3 3 0 0 0)
DHPR_HUMAN Dihydropteridine reductase (HDHPR) (Quinoid dihydropteridine redu	0.00430336	18.0565	25773	118572639	4 (2 0 1 0 1)
unnamed protein product [Homo sapiens]	0.0025358	18.0561	23528.6	21749196	2 (1 1 0 0 0)
unnamed protein product [Homo sapiens]	3.31801e-09	16.1812	49811	10433717	7 (2 2 2 1 0)
hypothetical protein [Homo sapiens]	0.00224472	16.1291	110722	52545742	2 (1 0 1 0 0)
ubiquitin-activating enzyme E1 [Homo sapiens]	0.00569223	16.1053	117774	23510338	2 (1 0 1 0 0)
DHSA_HUMAN Succinate dehydrogenase [ubiquinone] flavoprotein subunit, mitochon	3.86284e-05	16.097	72645.4	1169337	2 (1 0 1 0 0)
N Chain N, Mutant Monomer Of Recombinant Human Hexokinase Type I Complexed With	4.42547e-05	16.0923	102383	7245424	2 (1 0 1 0 0)
collapsin response mediator protein 1 isoform 2 [Homo sapiens]	1.90513e-05	16.0917	62144.8	4503051	4 (3 0 1 0 0)
DPYL4_HUMAN Dihydropyrimidinase-related protein 4 (DRP-4) (Collapsin response	1.90513e-05	16.0876	61838.5	68067941	3 (0 3 0 0 0)
alpha-spectrin [Homo sapiens]	0.00763101	16.0716	43790.8	829111	2 (1 0 1 0 0)
F-box only protein 30 [Homo sapiens]	0.000202058	16.0597	82250.9	34577055	3 (0 1 1 0 1)
ras homolog gene family, member T1 isoform 1 [Homo sapiens]	0.00809694	16.0482	79496.4	75750480	2 (1 0 1 0 0)
tubulin, beta, 2 [Homo sapiens]	3.31801e-09	14.1923	49799	5174735	7 (2 2 2 0 1)
prosaposin isoform a preproprotein [Homo sapiens]	2.29747e-06	14.1585	58073.9	11386147	2 (1 0 0 1 0)
kelch-like 17 [Homo sapiens]	0.00472157	14.0838	69830.2	38194229	2 (0 1 1 0 0)
hypothetical protein LOC345651 [Homo sapiens]	0.00903754	14.0801	41976	63055057	2 (0 1 1 0 0)
CENPF_HUMAN Centromere protein F (Kinetochore protein CENP-F) (Mitosin) (AH an	0.0086734	14.0653	367366	1345731	2 (0 1 1 0 0)
human Ku70 autoantigen homologue [Xenopus laevis] [	0.00313002	14.0577	69234.8	4630797	2 (1 0 0 1 0)
PDE4D protein [Homo sapiens]	0.00108584	14.0516	24413.4	14249999	5 (2 1 1 1 0)
CF118_HUMAN Uncharacterized protein C6orf118	0.00386377	14.0499	53738.1	71152375	2 (1 0 0 1 0)
hypothetical protein [Homo sapiens]	0.00106199	14.0447	143799	21739606	2 (1 0 0 1 0)
synaptonemal complex lateral element protein [Homo sapiens]	0.00551856	14.0438	175601	3256191	2 (0 1 1 0 0)
KIAA1058 protein [Homo sapiens]	0.00128513	12.1137	239264	20521746	2 (1 0 0 0 1)
lipin 3 [Homo sapiens]	0.00223322	12.0946	93556.5	74271888	2 (0 1 0 1 0)
similar to t-complex 1; T-complex locus TCP-1; t-complex 1 (a murine tcp	0.000958097	12.0905	19812.7	51094756	8 (3 1 1 2 1)
heat shock 70kDa protein 9B precursor [Homo sapiens]	0.00382522	12.0868	73634.8	24234688	2 (1 0 0 0 1)
KIAA1632 protein [Homo sapiens]	0.000381608	12.0493	165103	10047341	2 (1 0 0 0 1)
myelin oligodendrocyte glycoprotein [Homo sapiens] [M	4.46344e-07	10.2184	28175	793839	2 (2 0 0 0 0)
tubulin, alpha 1a [Mus musculus]	1.43452e-07	10.2165	49927.7	6678465	1 (1 0 0 0 0)
histone H2A [Homo sapiens]	7.56217e-09	10.2033	13986.8	28195394	2 (2 0 0 0 0)
CD9 antigen [Homo sapiens]	5.01155e-12	10.1846	25399	4502693	1 (1 0 0 0 0)
S100 calcium-binding protein, beta [Homo sapiens]	5.00454e-06	10.1758	10706	5454034	1 (1 0 0 0 0)
nef protein [Human immunodeficiency virus type 1] [M	0.0023618	10.1642	23532.7	3549007	1 (1 0 0 0 0)
SHPS1_HUMAN Tyrosine-protein phosphatase non-receptor type substrate 1 precur	1.7922e-05	10.1592	54778.7	29427656	2 (2 0 0 0 0)
guanine nucleotide-binding protein, beta-1 subunit [Mus musculus]	0.00340544	10.1424	37353	6680045	2 (2 0 0 0 0)
cytochrome c oxidase subunit VIIa polypeptide 2 (liver) precursor [Homo	1.40506e-05	10.142	9390.1	4502989	1 (1 0 0 0 0)
OR1E1_HUMAN Olfactory receptor 1E1 (Olfactory receptor OR17-18) (Olfactory rece	0.00920546	10.1318	35240.1	400671	2 (0 1 0 0 1)
Nogo-A protein [Homo sapiens]	4.75596e-05	10.1294	129861	9408096	2 (2 0 0 0 0)
unnamed protein product [Homo sapiens]	0.000462543	10.1276	30614	22760872	2 (1 0 0 1 0)
cytochrome c-1 [Homo sapiens]	0.00148199	10.123	35367	21359867	1 (1 0 0 0 0)
guanine nucleotide-binding protein, beta-2 subunit [Mus musculus]	0.00224553	10.119	37307.1	13937391	1 (1 0 0 0 0)
immunoglobulin light chain variable region [Homo sapiens]	0.00595038	10.113	11695.8	66096638	4 (3 1 0 0 0)
histone H2B [Homo sapiens]	0.00012941	10.1129	13927.6	1568557	1 (1 0 0 0 0)
A Chain A, Cyclophilin A Complexed With Dipeptide Gly-Pro	1.49889e-06	10.1128	17869.8	1633054	1 (1 0 0 0 0)
Na+/K+ -ATPase alpha 3 subunit [Homo sapiens]	0.00592021	10.1122	111677	22748667	1 (1 0 0 0 0)
tubulin, beta 2 [Homo sapiens]	5.67873e-08	10.1116	49875	4507729	2 (2 0 0 0 0)
AF150075_1 envelope glycoprotein gp120 [Human immunodeficiency virus type	0.00889751	10.102	10829.7	5456881	1 (1 0 0 0 0)
hCG1795719 [Homo sapiens]	0.000938127	10.101	22906.8	119573243	1 (1 0 0 0 0)
unnamed protein product [Homo sapiens]	0.00885401	10.1003	19667.9	7020367	1 (1 0 0 0 0)
calmodulin [Homo sapiens]	0.000177956	10.0972	17152	825635	1 (1 0 0 0 0)
envelope glycoprotein [Human immunodeficiency virus 2]	0.0033094	10.0968	14495.3	59797405	1 (1 0 0 0 0)
anti-tetanus toxoid immunoglobulin light chain variable region [Homo sap	0.00139707	10.0966	11536.6	58222508	3 (1 0 0 2 0)
sodium channel modifier 1 [Homo sapiens]	0.000752871	10.0965	25933.2	13128998	2 (1 1 0 0 0)
similar to BC001656 unknown (protein for MGC:2615) in Homo sapiens [Schi	0.00378165	10.0964	27571.6	29841268	1 (1 0 0 0 0)
cell division cycle 10 [Bos taurus]	1.21009e-06	10.0961	48727.1	47564098	1 (1 0 0 0 0)
unnamed protein product [Homo sapiens]	0.00693699	10.0946	40160.7	21757106	2 (0 0 1 1 0)
G01650 malate dehydrogenase (EC 1.1.1.37), cytosolic - human [	0.000118346	10.0945	36392	7431153	1 (1 0 0 0 0)
vesicle-associated membrane protein 2 (synaptobrevin 2) [Homo sapiens]	0.00500321	10.0915	12640.7	7657675	1 (1 0 0 0 0)
immunoglobulin heavy chain variable region [Homo sapiens]	0.00348384	10.089	10921.4	112696794	2 (1 0 0 1 0)
immunoglobulin alpha heavy chain variable region [Homo sapiens]	0.00333119	10.0874	14011.9	62871218	5 (2 2 0 0 1)
peptidylprolyl isomerase A [Mus musculus]	0.00533929	10.0864	17959.8	6679439	1 (1 0 0 0 0)
U10 [Human herpesvirus 7]	0.00462345	10.0858	51639.7	51874233	2 (0 0 1 1 0)
Chain , Human Rhoa Complexed With Gtp Analogue	0.00704702	10.0854	20557.3	3318980	2 (2 0 0 0 0)
NADH dehydrogenase (ubiquinone) flavoprotein 1, 51kDa [Homo sapiens]	0.000161643	10.0849	50784.9	20149568	1 (1 0 0 0 0)
unnamed protein product [Homo sapiens]	0.000114962	10.084	36909.7	10434073	1 (1 0 0 0 0)
B Chain B, T-To-T(High) Quaternary Transitions In Human Hemoglobin: Deshis146b	0.000255496	10.0834	15720.2	61679604	1 (1 0 0 0 0)
5' nucleotidase, ecto [Homo sapiens]	0.00124796	10.0824	63327.6	4505467	3 (1 2 0 0 0)
guanine nucleotide binding protein, alpha activating polypeptide O [Ho	0.000447494	10.0822	40024.9	10567816	2 (2 0 0 0 0)
neuronal cell adhesion molecule [Homo sapiens]	0.00605145	10.08	130938	51095143	1 (1 0 0 0 0)
endothelin-converting enzyme, isoform ECE-1a [Homo sapiens]	0.000305032	10.0787	85753.9	1177448	1 (1 0 0 0 0)
MGA_HUMAN Maltase-glucoamylase, intestinal [Includes: Maltase (Alpha-glucosid	0.00260491	10.0773	209719	21431783	1 (1 0 0 0 0)
hCG1658588 [Homo sapiens]	0.00503109	10.0769	12586.6	119605801	1 (1 0 0 0 0)
A Chain A, Superoxide Dismutase (E.C.1.15.1.1)	0.00199478	10.0746	15908	515251	1 (1 0 0 0 0)
A Chain A, Human Prion Protein	5.59682e-05	10.0723	22876.6	6730485	1 (1 0 0 0 0)
STX1B_HUMAN Syntaxin-1B1 (Syntaxin 1B)	0.000261107	10.0722	33410.1	2501085	1 (1 0 0 0 0)
hypothetical protein [Homo sapiens]	0.000248399	10.0719	186746	51476196	1 (1 0 0 0 0)
carnitine palmitoyltransferase 1C, isoform CRA_h [Homo sapiens]	0.00206183	10.0711	7915.97	119572917	1 (1 0 0 0 0)
tubulin, beta 5 [Mus musculus]	4.94215e-05	10.071	49639	7106439	1 (1 0 0 0 0)
Thy-1 cell surface antigen [Homo sapiens]	7.56101e-06	10.0706	17923.3	19923362	1 (1 0 0 0 0)
unnamed protein product [Homo sapiens]	0.00304218	10.0701	50621.8	10435466	4 (2 0 2 0 0)
hypothetical protein LOC79091 [Homo sapiens]	0.00129069	10.0699	44458.4	94536786	1 (1 0 0 0 0)
immunoglobulin heavy chain variable region [Homo sapiens]	0.000522362	10.0692	13618.6	84683058	1 (1 0 0 0 0)
hCG41279 [Homo sapiens]	6.93951e-05	10.0685	17019.3	119623311	1 (1 0 0 0 0)
lanthionine synthetase C-like protein 1 [Homo sapiens]	2.6023e-06	10.0679	45253.6	5174445	1 (1 0 0 0 0)
unnamed protein product [Homo sapiens]	0.00292469	10.067	24399.8	10438905	1 (1 0 0 0 0)
KIAA0821 protein [Homo sapiens]	0.00019908	10.0666	172156	40788373	1 (1 0 0 0 0)
envelope glycoprotein [Human immunodeficiency virus 1]	0.0037302	10.0637	24677.4	62904647	2 (0 0 1 1 0)
unnamed protein product [Homo sapiens]	0.00663773	10.0636	26559.4	10433591	1 (1 0 0 0 0)
envelope glycoprotein [Human immunodeficiency virus 1]	0.000758072	10.0636	9613.99	145342697	1 (1 0 0 0 0)
phosphatidylinositol transfer protein membrane-associated 1 [Homo sapien	0.00314226	10.0635	134662	37993630	7 (3 0 3 0 1)
Vpu [Human immunodeficiency virus 1]	0.000837149	10.0629	9190.82	119507964	1 (1 0 0 0 0)
KIAA1297 protein [Homo sapiens]	2.30517e-05	10.0625	243340	7242949	1 (1 0 0 0 0)
calnexin precursor [Homo sapiens]	0.00030416	10.0611	67526	10716563	1 (1 0 0 0 0)
FK506-binding protein 2 precursor [Homo sapiens]	0.000544572	10.0602	15639.3	17149842	1 (1 0 0 0 0)
restin isoform a [Homo sapiens]	0.00769459	10.0593	160890	4506751	3 (1 1 1 0 0)
WAPAL protein [Homo sapiens]	0.0072694	10.0592	45531.9	16924240	1 (1 0 0 0 0)
mitogen-activated protein kinase 12 [Homo sapiens]	0.000300976	10.0591	41913.5	48255970	1 (1 0 0 0 0)
hypothetical protein [Homo sapiens]	2.08514e-05	10.059	47898.4	6807864	1 (1 0 0 0 0)
choline dehydrogenase [Homo sapiens]	0.00213879	10.0589	65360.3	27501456	1 (1 0 0 0 0)
N-acetyltransferase 11 [Homo sapiens]	0.00598775	10.0587	27206.1	13376119	1 (1 0 0 0 0)
KIAA1727 protein [Homo sapiens]	0.00441545	10.0581	123188	12697999	1 (1 0 0 0 0)
G02434 DNA-directed DNA polymerase (EC 2.7.7.7) epsilon catalytic chain A [validate	0.00763865	10.0581	261223	7428081	1 (1 0 0 0 0)
envelope glycoprotein [Human immunodeficiency virus 2]	0.00392549	10.0568	98850.3	94315235	1 (1 0 0 0 0)
immunoglobulin heavy chain variable region [Homo sapiens]	0.00560068	10.056	12954.1	54145431	2 (1 1 0 0 0)
transcription factor 12 isoform b [Homo sapiens]	0.0008209	10.0559	72920.3	4507391	1 (1 0 0 0 0)
chaperonin containing TCP1, subunit 6A isoform a [Homo sapiens]	0.00456298	10.0539	57987.7	4502643	1 (1 0 0 0 0)
toll-like receptor 5 [Homo sapiens]	0.00525867	10.0529	97737.4	16751843	2 (0 1 0 0 1)
immunoglobulin kappa light chain variable region [Homo sapiens]	0.00189501	10.0517	9071.43	71902385	1 (1 0 0 0 0)
envelope glycoprotein [Human immunodeficiency virus 1]	0.0075135	10.0517	36299	27762705	1 (1 0 0 0 0)
VP13B_HUMAN Vacuolar protein sorting-associated protein 13B (Cohen syndrome p	0.00973782	10.0481	448448	42558898	1 (1 0 0 0 0)
asparagine-linked glycosylation 5 [Homo sapiens]	0.00570409	10.0465	36922.4	7019323	1 (1 0 0 0 0)
hCG1746478 [Homo sapiens]	0.00673589	10.0462	8765.43	119597464	1 (1 0 0 0 0)
SR protein kinase (SRPK) involved in regulating proteins involved in mR	0.000840052	10.0462	83185.8	6323872	1 (1 0 0 0 0)
Xeroderma Pigmentosum Group E Complementing protein [Homo sapiens]	0.00723872	10.0452	126831	2632123	1 (1 0 0 0 0)
envelope glycoprotein [Human immunodeficiency virus 1]	0.00976746	10.045	28411.3	73334815	1 (1 0 0 0 0)
replicase polyprotein 1ab [Human coronavirus 229E]	0.00705881	10.0443	753677	12175747	2 (0 1 0 0 1)
unnamed protein product [Homo sapiens]	0.00756675	10.0435	154946	47077203	1 (1 0 0 0 0)
zinc finger protein 560 [Homo sapiens]	0.00535931	10.0412	91061.6	124517687	1 (1 0 0 0 0)
ATP/GTP binding protein-like 1 [Homo sapiens] [M	0.00800898	10.0408	120205	120444924	1 (1 0 0 0 0)
envelope glycoprotein [Human immunodeficiency virus 1]	0.00238959	10.0406	21604.5	30058856	1 (1 0 0 0 0)
AF484498_2 gag polyprotein precursor [Human immunodeficiency virus 1] [MA	0.0022695	10.0395	55400.4	25166832	1 (1 0 0 0 0)
RuvB-like 1 [Homo sapiens]	0.00413137	10.0382	50196.4	4506753	2 (0 1 0 0 1)
DNA packaging terminase subunit 1 [Human herpesvirus 3]	0.00614478	10.0376	82704	9625919	1 (1 0 0 0 0)
AACS protein [Homo sapiens]	0.00334385	8.14357	45607.8	71297231	2 (0 2 0 0 0)
AF470976_1 pol polyprotein [Human immunodeficiency virus type 1]	0.00158477	8.13638	41160.8	21686054	2 (0 2 0 0 0)
IgM, variable region, rheumatoid factor, autoantibody [Homo sapiens] [MAS	0.00294411	8.11697	12616.1	510394	1 (0 1 0 0 0)
envelope glycoprotein [Human immunodeficiency virus 1]	0.000632743	8.10693	19914.3	125395709	1 (0 1 0 0 0)
envelope glycoprotein [Human immunodeficiency virus type 1]	0.00889751	8.10193	8244.29	13774683	1 (0 1 0 0 0)
UL120 [Human herpesvirus 5 strain Merlin]	0.00449538	8.10014	23119.5	52139284	1 (0 1 0 0 0)
unnamed protein product [Homo sapiens]	0.00201578	8.09943	20185.4	21753982	1 (0 1 0 0 0)
pol protein [Human immunodeficiency virus 1]	0.00773056	8.09684	22058.9	34099332	1 (0 1 0 0 0)
hCG28318, isoform CRA_b [Homo sapiens]	0.00052102	8.09293	136608	119584546	1 (0 1 0 0 0)
pol protein [Human immunodeficiency virus 1]	0.000357336	8.08748	49304.4	109893504	1 (0 1 0 0 0)
hCG1794531, isoform CRA_a [Homo sapiens]	0.00142997	8.08356	6752.76	119570800	1 (0 1 0 0 0)
polyprotein [Human coxsackievirus A3]	0.00353642	8.0803	243137	40068431	1 (0 1 0 0 0)
SIX4_HUMAN Homeobox protein SIX4 (Sine oculis homeobox homolog 4)	0.0064211	8.07764	80782.6	12230612	1 (0 1 0 0 0)
DHX16_HUMAN Putative pre-mRNA-splicing factor ATP-dependent RNA helicase DHX1	0.00796813	8.07619	119190	26006959	2 (0 0 1 0 1)
A Chain A, Human Homogentisate Dioxygenase With Fe(Ii)	0.00678847	8.07282	52765.4	11514025	1 (0 1 0 0 0)
reverse transcriptase [Human immunodeficiency virus 1]	0.0086734	8.07169	32228.9	58532154	1 (0 1 0 0 0)
hCG1644040 [Homo sapiens]	0.00185735	8.06858	29664.5	119585027	2 (0 0 0 2 0)
solute carrier family 28 (sodium-coupled nucleoside transporter), membe	0.0082813	8.06514	71948.4	4759132	1 (0 1 0 0 0)
CX052_HUMAN Uncharacterized protein CXorf52 (SPCX)	0.00279847	8.06273	13799	73620724	1 (0 1 0 0 0)
leucine rich repeat containing 59 [Homo sapiens]	0.000222868	8.0619	34908.9	40254924	1 (0 1 0 0 0)
hCG1642151, isoform CRA_a [Homo sapiens]	0.00310626	8.06112	45262.2	119579662	2 (0 0 0 2 0)
OTU domain containing 7A [Homo sapiens]	0.00691579	8.0608	100615	18702331	1 (0 1 0 0 0)
protein-tyrosine phosphatase, PTPase {clone F36-15} [human, leukemia cell	2.2573e-05	8.05783	13999.7	300038	1 (0 1 0 0 0)
pol polyprotein [Human immunodeficiency virus type 1]	0.00506502	8.05494	40409.8	13739694	1 (0 1 0 0 0)
hypothetical protein HPV_s1gp1 [Human picobirnavirus]	0.00196125	8.05102	24918.5	66391745	1 (0 1 0 0 0)
unnamed protein product [Homo sapiens]	0.00692114	8.05097	70434.6	47077082	1 (0 1 0 0 0)
PH0269 epidermal autoantigen 450K (clone pE450-B) - human (fragment)	0.00208688	8.05092	30859	1082355	1 (0 1 0 0 0)
A45036 single-stranded-DNA-binding protein Pur alpha - human [MA	0.00020055	8.0507	34948.5	346338	1 (0 1 0 0 0)
hCG2040460 [Homo sapiens]	0.00940916	8.05012	8304.22	119621539	1 (0 1 0 0 0)
immunoglobulin alpha heavy chain variable region [Homo sapiens]	0.000748004	8.04949	10349	13378182	1 (0 1 0 0 0)
AF156838_1 pol polyprotein [Human immunodeficiency virus type 1]	0.00603857	8.04907	65784.7	8885960	1 (0 1 0 0 0)
envelope glycoprotein [Human immunodeficiency virus 1]	0.00314736	8.04874	96747.4	71725979	1 (0 1 0 0 0)
cyclin D2 [Homo sapiens]	0.00408087	8.0463	33045.8	4502617	1 (0 1 0 0 0)
sentrin/SUMO-specific protease 1 [Homo sapiens]	0.00950588	8.04435	73305.8	7657550	1 (0 1 0 0 0)
gag protein [Human immunodeficiency virus 1]	0.00990267	8.04389	54643.9	62997629	1 (0 1 0 0 0)
pericentriolar material 1, isoform CRA_a [Homo sapiens]	0.00970894	8.04002	228386	119584200	1 (0 1 0 0 0)
unnamed protein product [Homo sapiens]	0.00913484	8.03868	32782.2	16553829	2 (0 0 1 0 1)
transmembrane protein 84, isoform CRA_b [Homo sapiens]	0.00422179	8.03378	9662.09	119598240	1 (0 1 0 0 0)
adaptor-related protein complex 4, sigma 1 subunit [Danio rerio]	0.00718948	4.04974	16314.6	51468086	2 (0 0 0 0 2)
hypothetical protein [Homo sapiens]	0.00945276	2.07069	52016.4	34364772	5 (0 2 2 0 1)
RTP4_HUMAN Receptor-transporting protein 4 (28 kDa interferon-responsive prot	0.00303644	2.04141	27992.8	61252303	2 (1 0 0 0 1)
hypothetical protein LOC79684 [Homo sapiens]	13375860	2 (0 1 0 1 0)
hypothetical protein [Homo sapiens]	31874020	3 (1 0 1 0 1)
prolyl 4-hydroxylase, beta subunit precursor [Homo sapiens]	20070125	2 (0 1 0 1 0)
Mitochondrial protein, forms a heterodimer complex with Mto1p that perf	6323665	2 (1 0 0 0 1)
O12D2_HUMAN Olfactory receptor 12D2 (Olfactory receptor OR6-28) (Hs6M1-20)	14423788	2 (1 0 0 0 1)
GTPase-activating protein [Homo sapiens]	2389009	3 (0 2 0 1 0)
similar to protein phosphatase 1, regulatory (inhibitor) subunit 12B i	37546669	3 (0 0 1 1 1)
MTA1_HUMAN Metastasis-associated protein MTA1	2498589	2 (0 0 2 0 0)
DNA directed RNA polymerase II polypeptide B [Homo sapiens]	4505941	3 (0 0 1 1 1)
KIAA1575 protein [Homo sapiens]	27529915	2 (0 0 2 0 0)
DnaJ (Hsp40) homolog, subfamily C, member 3 [Homo sapiens]	5453980	2 (0 1 0 1 0)
H2A histone family, member O [Homo sapiens]	4504251	4 (4 0 0 0 0)
unnamed protein product [Homo sapiens]	10435335	3 (3 0 0 0 0)
tubulin, alpha 1a [Mus musculus]	6678465	4 (4 0 0 0 0)
ATPase, H+ transporting, lysosomal, V0 subunit c [Homo sapiens]	4502313	1 (1 0 0 0 0)
H2A histone family, member A [Homo sapiens]	10645195	3 (3 0 0 0 0)
neurofilament-66; NF-66 [Homo sapiens]	994844	1 (1 0 0 0 0)
lanthionine synthetase C-like protein 1 [Homo sapiens]	5174445	2 (2 0 0 0 0)
neurofilament, light polypeptide 68kDa, isoform CRA_b [Homo sapiens] [M	119584005	1 (1 0 0 0 0)
mitogen-activated protein kinase kinase 2 [Homo sapiens]	13489054	1 (1 0 0 0 0)
hCG2041853 [Homo sapiens]	119606879	1 (1 0 0 0 0)
creatine kinase, mitochondrial 1B precursor [Homo sapiens]	10334859	2 (2 0 0 0 0)
alpha SNAP [Homo sapiens]	3929617	1 (1 0 0 0 0)
N-Acetylglucosamine kinase [Homo sapiens]	6491737	2 (2 0 0 0 0)
AF102846_1 N-ethylmaleimide-sensitive factor [Homo sapiens]	10257494	1 (1 0 0 0 0)
AF142498_1 14-3-3 gamma protein [Homo sapiens]	5726310	2 (0 1 0 0 1)
gag protein [Human immunodeficiency virus 1]	90812182	4 (2 2 0 0 0)
hCG2031213, isoform CRA_a [Homo sapiens]	119569224	1 (1 0 0 0 0)
SUCA_HUMAN Succinyl-CoA ligase [GDP-forming] subunit alpha, mitochondrial pre	20141765	1 (1 0 0 0 0)
heterogeneous nuclear ribonucleoprotein A3 [Homo sapiens]	34740329	1 (1 0 0 0 0)
immunoglobulin heavy chain VHDJ region [Homo sapiens]	21670389	1 (1 0 0 0 0)
CD9 antigen [Homo sapiens]	4502693	2 (2 0 0 0 0)
tyrosine 3/tryptophan 5 -monooxygenase activation protein, theta polype	5803227	2 (2 0 0 0 0)
Chain , Human Complement Regulatory Protein Cd59 (Extracellular Region, Resid	515118	3 (3 0 0 0 0)
vpu protein [Human immunodeficiency virus type 1]	11321004	30 (5 13 7 3 2)
A Chain A, Crystal Structure Of Dictyostelium Discoideum Actin Complexed With	28374049	1 (1 0 0 0 0)
envelope glycoprotein [Human immunodeficiency virus type 1]	2290045	1 (1 0 0 0 0)
guanine nucleotide binding protein, alpha activating polypeptide O [Ho	10567816	2 (2 0 0 0 0)
GDAP1_HUMAN Ganglioside-induced differentiation-associated protein 1 (GDAP1)	38257679	1 (1 0 0 0 0)
CD3E antigen, epsilon polypeptide (TiT3 complex) [Homo sapiens]	4502671	1 (1 0 0 0 0)
THUMP domain containing 3 [Homo sapiens]	14149690	1 (1 0 0 0 0)
vesicle-associated membrane protein 2 (synaptobrevin 2) [Homo sapiens]	7657675	1 (1 0 0 0 0)
A42177 KRAB-domain-containing zinc finger protein ZNF45 - human (fragment)	284284	3 (2 1 0 0 0)
gag protein [Human immunodeficiency virus 1]	73913213	1 (1 0 0 0 0)
C Chain C, Crystal Structure Of Fibrinogen Fragment D	2781209	1 (1 0 0 0 0)
MTMR6_HUMAN Myotubularin-related protein 6	33112672	1 (1 0 0 0 0)
synaptotagmin I [Homo sapiens]	5032139	1 (1 0 0 0 0)
RUN and FYVE domain containing 3 isoform 1 [Homo sapiens]	82697315	2 (0 1 0 0 1)
AF166243_1 polyprotein [Human coxsackievirus A9]	6752609	3 (1 0 1 1 0)
DEAH (Asp-Glu-Ala-His) box polypeptide 40, isoform CRA_e [Homo sapiens]	119614812	2 (1 0 0 1 0)
peroxisome proliferator-activated receptor gamma, coactivator 1 beta [	31543392	1 (1 0 0 0 0)
SH3KBP1 binding protein 1 [Homo sapiens]	19923917	2 (2 0 0 0 0)
jerky homolog-like [Homo sapiens]	22547224	1 (1 0 0 0 0)
envelope glycoprotein [Human immunodeficiency virus type 1]	1079597	1 (1 0 0 0 0)
phosphatidylinositol-4-phosphate 5-kinase type II beta [Homo sapiens]	4505819	1 (1 0 0 0 0)
myelin oligodendrocyte glycoprotein [Homo sapiens] [M	793839	1 (1 0 0 0 0)
unnamed protein product [Homo sapiens]	10436240	3 (3 0 0 0 0)
DMRT-like family B with proline-rich C-terminal, 1, isoform CRA_a [Homo	119627140	1 (1 0 0 0 0)
gp120 [Human immunodeficiency virus type 1]	4071152	4 (2 0 1 1 0)
KIAA0570 protein [Homo sapiens]	20521085	3 (1 0 1 1 0)
2,4-dienoyl CoA reductase 1 precursor [Homo sapiens]	4503301	1 (1 0 0 0 0)
mitochondrial glutamate carrier 1 [Homo sapiens]	13375983	3 (3 0 0 0 0)
guanylate binding protein 1, interferon-inducible, 67kDa, isoform CRA_b	119593555	1 (1 0 0 0 0)
bromodomain and WD repeat domain containing 2 [Homo sapiens]	13324688	3 (3 0 0 0 0)
unnamed protein product [Homo sapiens]	28375487	3 (3 0 0 0 0)
envelope glycoprotein [Human immunodeficiency virus 1]	30314763	7 (1 1 3 2 0)
hCG2040698 [Homo sapiens]	119599751	1 (1 0 0 0 0)
coronin, actin binding protein, 1A [Homo sapiens]	5902134	1 (1 0 0 0 0)
protease [Human immunodeficiency virus 1]	71391911	1 (1 0 0 0 0)
synaptosomal-associated protein 25 [Mus musculus]	6755588	2 (2 0 0 0 0)
VL1_HPV65 Major capsid protein L1	586244	1 (1 0 0 0 0)
early endosome antigen 1, 162kD, isoform CRA_b [Homo sapiens]	119617878	1 (1 0 0 0 0)
tubulin, beta [Mus musculus]	21746161	1 (1 0 0 0 0)
AF144813_1 gag protein [Human immunodeficiency virus type 1]	7767259	1 (1 0 0 0 0)
envelope protein [Human immunodeficiency virus 1] [M	623988	1 (1 0 0 0 0)
LAMA2_HUMAN Laminin subunit alpha-2 precursor (Laminin M chain) (Merosin heavy	2506805	4 (0 0 0 1 3)
oxygen regulated protein precursor [Homo sapiens]	5453832	2 (0 1 0 0 1)
reverse transcriptase [Human immunodeficiency virus 1]	125746732	2 (1 0 1 0 0)
reverse transcriptase [Human immunodeficiency virus 1]	18075077	3 (1 1 1 0 0)
envelope glycoprotein [Human immunodeficiency virus 1]	56125862	1 (1 0 0 0 0)
NG5 protein [Homo sapiens]	77681565	1 (1 0 0 0 0)
LRP16 protein [Homo sapiens]	13569840	4 (1 1 1 0 1)
protoporphyrinogen oxidase [Homo sapiens]	4506001	3 (0 1 0 1 1)
putative protein product of HMFT1638 [Homo sapiens]	51555781	1 (1 0 0 0 0)
solute carrier family 17, member 7 [Homo sapiens]	9945322	1 (1 0 0 0 0)
envelope glycoprotein [Human immunodeficiency virus 1]	50592176	1 (1 0 0 0 0)
LAMC1_HUMAN Laminin subunit gamma-1 precursor (Laminin B2 chain)	126369	1 (1 0 0 0 0)
DDX20_HUMAN Probable ATP-dependent RNA helicase DDX20 (DEAD box protein 20) (	12643886	1 (1 0 0 0 0)
A30802 Ca2+-transporting ATPase (EC 3.6.3.8) 2, plasma membrane - human	86988	1 (1 0 0 0 0)
NADH dehydrogenase (ubiquinone) Fe-S protein 6, 13kDa (NADH-coenzyme Q	4758792	1 (1 0 0 0 0)
envelope glycoprotein V3 [Human immunodeficiency virus 1]	23304788	1 (1 0 0 0 0)
I38080 replication licensing factor MCM5 - human	2135871	1 (1 0 0 0 0)
AF344773_1 vpu protein [Human immunodeficiency virus type 1]	13487595	1 (1 0 0 0 0)
hypothetical protein [Homo sapiens]	30268314	1 (1 0 0 0 0)
immunoglobulin heavy chain VHDJ region [Homo sapiens]	21670711	1 (1 0 0 0 0)
KIF6 protein [Homo sapiens]	18314519	1 (1 0 0 0 0)
gag protein [Human immunodeficiency virus 1]	46946961	1 (1 0 0 0 0)
immunoglobulin lambda light chain [Homo sapiens] [MA	4566097	2 (2 0 0 0 0)
hypothetical protein LOC51233, isoform CRA_b [Homo sapiens]	119579990	1 (1 0 0 0 0)
protease [Human immunodeficiency virus 1]	71391939	2 (1 0 1 0 0)
ubiquitin specific peptidase 38 [Homo sapiens]	27545313	1 (1 0 0 0 0)
envelope glycoprotein [Human immunodeficiency virus 1]	114151288	1 (1 0 0 0 0)
vpu protein [Human immunodeficiency virus 1]	90812198	1 (1 0 0 0 0)
gag protein [Human immunodeficiency virus 1]	80974922	1 (1 0 0 0 0)
AF075702_7 envelope glycoprotein [Human immunodeficiency virus type 1] [MA	5305484	1 (1 0 0 0 0)
pol polyprotein [Human immunodeficiency virus type 1]	13739590	2 (1 1 0 0 0)
likely ortholog of H. sapiens CUE domain containing 1 (CUEDC1) [Mus mus	56205535	2 (2 0 0 0 0)
JE0288 krueppel-type zinc finger protein - human	7447221	3 (0 1 1 0 1)
uromodulin-like 1 protein variant 9 [Homo sapiens]	48762472	1 (1 0 0 0 0)
reticulon 1 isoform A [Homo sapiens]	10863935	1 (1 0 0 0 0)
immunoglobulin heavy chain variable region [Homo sapiens]	113472268	1 (1 0 0 0 0)
nef [Human immunodeficiency virus type 1]	5070577	2 (0 0 1 1 0)
AF286555_1 envelope glycoprotein V3 region [Human immunodeficiency virus t	9885705	1 (1 0 0 0 0)
kinesin light chain 1K [Homo sapiens]	30409768	1 (1 0 0 0 0)
hypothetical protein [Homo sapiens]	21739162	1 (1 0 0 0 0)
envelope glycoprotein gp120 [Human immunodeficiency virus 1]	85662998	1 (1 0 0 0 0)
envelope glycoprotein [Human immunodeficiency virus type 1]	4679939	1 (1 0 0 0 0)
vpr protein [Human immunodeficiency virus 1]	77167711	1 (1 0 0 0 0)
FLJ00067 protein [Homo sapiens]	10440462	2 (1 0 1 0 0)
envelope glycoprotein [Human immunodeficiency virus type 1]	1845945	1 (1 0 0 0 0)
KRHU2 keratin 1, type II, cytoskeletal - human	7428712	2 (1 1 0 0 0)
hCG1813638 [Homo sapiens]	119599427	1 (1 0 0 0 0)
meningioma 1 [Homo sapiens]	55956910	1 (1 0 0 0 0)
serine/threonine protein kinase 11 [Homo sapiens]	4507271	1 (1 0 0 0 0)
nef protein [Human immunodeficiency virus 1]	55560414	1 (1 0 0 0 0)
S100 calcium binding protein A13, isoform CRA_b [Homo sapiens]	119573683	1 (1 0 0 0 0)
KIAA1429 protein [Homo sapiens]	7243239	2 (0 0 1 1 0)
hCG2005342 [Homo sapiens]	119571856	1 (1 0 0 0 0)
minor histocompatibility antigen HA-1 [Homo sapiens]	47834348	1 (1 0 0 0 0)
alpha (1,2) fucosyltransferase [Homo sapiens]	1694699	2 (0 1 0 0 1)
hypothetical protein [Homo sapiens]	4884132	1 (1 0 0 0 0)
envelope glycoprotein [Human immunodeficiency virus 1]	24459646	1 (1 0 0 0 0)
B42856 ubiquitin carrier protein E2 - human	345829	1 (1 0 0 0 0)
CUTL1_HUMAN Homeobox protein cut-like 1 (CCAAT displacement protein) (CDP) [M	76803552	2 (0 1 0 0 1)
protease [Human immunodeficiency virus 1]	125745875	1 (1 0 0 0 0)
unnamed protein product [Homo sapiens]	10438319	1 (1 0 0 0 0)
envelope glycoprotein [Human immunodeficiency virus 1]	13559438	2 (0 1 0 0 1)
NS1 [Human bocavirus]	77125237	1 (1 0 0 0 0)
U06698 neuronal kinesin heavy chain from Homo sa	5263326	1 (1 0 0 0 0)
immunoglobulin heavy chain variable region [Homo sapiens]	111918173	1 (1 0 0 0 0)
antigen NY-CO-3 [Homo sapiens]	3170176	1 (1 0 0 0 0)
envelope glycoprotein [Human immunodeficiency virus 1]	87246784	1 (1 0 0 0 0)
zinc finger protein 673 [Homo sapiens]	8923322	1 (1 0 0 0 0)
tyrosylprotein sulfotransferase 1 [Homo sapiens]	4507665	1 (1 0 0 0 0)
vitelliform macular dystrophy 2-like 3 isoform 1 [Homo sapiens]	115527104	1 (1 0 0 0 0)
TBP-associated factor 13 [Homo sapiens]	5032155	1 (1 0 0 0 0)
DNA-dependent protein kinase catalytic subunit [Homo sapiens]	18143319	1 (1 0 0 0 0)
tetratricopeptide repeat domain 18 [Homo sapiens]	40255087	3 (2 1 0 0 0)
KIAA0820 protein [Homo sapiens]	20521666	1 (1 0 0 0 0)
TAT_HV1B9 Protein Tat (Transactivating regulatory protein)	75593170	2 (1 1 0 0 0)
hCG1987492 [Homo sapiens]	119620735	1 (1 0 0 0 0)
hypothetical protein LOC388284 [Homo sapiens]	125628665	1 (1 0 0 0 0)
modulator of apoptosis 1 [Homo sapiens]	19923584	1 (1 0 0 0 0)
X-ray repair cross complementing protein 3 [Homo sapiens]	4885659	1 (1 0 0 0 0)
oxidoreductase NAD-binding domain containing 1 [Homo sapiens]	19923907	1 (1 0 0 0 0)
anti-tetanus toxoid immunoglobulin heavy chain variable region [Homo sap	58221951	1 (1 0 0 0 0)
syntaxin 1B2 [Rattus norvegicus]	6981600	1 (1 0 0 0 0)
VRK3 protein [Homo sapiens]	23272127	1 (1 0 0 0 0)
TNKS1_HUMAN Tankyrase-1 (TANK1) (Tankyrase I) (TNKS-1) (TRF1-interacting anky	20140451	1 (1 0 0 0 0)
K1045_HUMAN Protein KIAA1045	73621116	1 (1 0 0 0 0)
hypothetical protein [Homo sapiens]	6808198	2 (0 0 1 1 0)
formiminotransferase cyclodeaminase [Homo sapiens]	11140815	1 (1 0 0 0 0)
polyprotein [Human rhinovirus 47]	38490016	1 (1 0 0 0 0)
hypothetical protein LOC79736 [Homo sapiens]	134053959	1 (1 0 0 0 0)
hematopoietic signal peptide-containing isoform 2 [Homo sapiens]	45580696	1 (1 0 0 0 0)
envelope glycoprotein [Human immunodeficiency virus 1]	22135336	1 (1 0 0 0 0)
leukemia-associated protein 2 [Homo sapiens]	19716178	1 (1 0 0 0 0)
KIAA0431 [Homo sapiens]	40788259	1 (1 0 0 0 0)
coiled-coil domain containing 42 [Homo sapiens]	21389579	1 (1 0 0 0 0)
Tubulin, beta [Homo sapiens]	18088719	2 (1 1 0 0 0)
actin-like protein [Homo sapiens]	62420916	2 (0 1 1 0 0)
unnamed protein product [Homo sapiens]	22760140	1 (0 1 0 0 0)
Na,K-ATPase catalytic subunit alpha-A protein [Homo sapiens]	5919228	2 (0 2 0 0 0)
F-box and WD repeat domain containing 11 isoform A [Homo sapiens]	48928048	1 (0 1 0 0 0)
S34775 nicotinic acetylcholine receptor epsilon chain precursor - human	479584	2 (0 2 0 0 0)
S31503 H+/K+-exchanging ATPase (EC 3.6.3.10) ATP1AL1 - human (fragment)	346261	2 (1 1 0 0 0)
ORF putative E6 [Human papillomavirus type 59]	557237	1 (0 1 0 0 0)
pol polyprotein [Human immunodeficiency virus type 1]	13739666	1 (0 1 0 0 0)
Unknown [Homo sapiens]	4406607	4 (1 2 1 0 0)
coiled-coil domain containing 25 [Homo sapiens]	108936950	5 (0 4 1 0 0)
solute carrier family 10 (sodium/bile acid cotransporter family), memb	24308414	2 (0 0 1 0 1)
DNA packaging tegument protein UL25 [Human herpesvirus 3]	9625909	2 (0 0 1 0 1)
nuclear protein in testis, isoform CRA_b [Homo sapiens]	119612711	1 (0 1 0 0 0)
NEDD4_HUMAN E3 ubiquitin-protein ligase NEDD4	32172435	2 (0 2 0 0 0)
unnamed protein product [Homo sapiens]	47076905	1 (0 1 0 0 0)
AF258985_1 envelope glycoprotein [Human immunodeficiency virus type 1] [M	10952674	1 (0 1 0 0 0)
immunoglobulin E heavy chain variable region [Homo sapiens]	37014267	2 (0 1 0 0 1)
AF447582_1 HLCDGP1 [Homo sapiens]	18139947	1 (0 1 0 0 0)
tartrate resistant acid phosphatase 5 precursor [Homo sapiens]	4501873	2 (0 2 0 0 0)
envelope glycoprotein [Human immunodeficiency virus 1]	37695036	1 (0 1 0 0 0)
immunoglobulin heavy chain variable region [Homo sapiens]	71273902	1 (0 1 0 0 0)
immunoglobulin heavy chain variable region [Homo sapiens]	21327849	1 (0 1 0 0 0)
anaplastic lymphoma kinase (Ki-1), isoform CRA_c [Homo sapiens]	119620913	1 (0 1 0 0 0)
envelope glycoprotein [Human immunodeficiency virus type 1]	6739693	1 (0 1 0 0 0)
unnamed protein product [Homo sapiens]	34531946	1 (0 1 0 0 0)
envelope glycoprotein [Human immunodeficiency virus 1]	29647780	1 (0 1 0 0 0)
hCG201417 [Homo sapiens]	119594542	1 (0 1 0 0 0)
phosphotyrosyl phosphatase activator [Homo sapiens]	509243	1 (0 1 0 0 0)
immunoglobulin heavy chain variable region [Homo sapiens]	5419751	2 (0 0 1 0 1)
ATP synthase, H+ transporting, mitochondrial F0 complex, subunit d isof	5453559	1 (0 1 0 0 0)
pol protein [Human immunodeficiency virus 1]	60265123	1 (0 1 0 0 0)
envelope glycoprotein [Human immunodeficiency virus type 1]	10719731	1 (0 1 0 0 0)
HESB like domain containing 1 [Homo sapiens]	34996487	1 (0 1 0 0 0)
protease [Human immunodeficiency virus 1]	71843396	2 (1 1 0 0 0)
functionless protein [Homo sapiens]	38256947	1 (0 1 0 0 0)
zinc finger, DHHC-type containing 11 [Homo sapiens]	13376150	1 (0 1 0 0 0)
glioma pathogenesis-related protein precursor [Homo sapiens]	110825980	2 (1 1 0 0 0)
AF067164_1 zinc finger protein 2 [Homo sapiens]	4894362	2 (0 0 0 2 0)
TRI25_HUMAN Tripartite motif-containing protein 25 (Zinc finger protein 147)	12585547	3 (0 2 0 0 1)
antibody, light chain variable regin to HIV1 gp41 [Homo sapiens]	732740	1 (0 1 0 0 0)
FLJ00345 protein [Homo sapiens]	21748544	1 (0 1 0 0 0)
gag protein [Human immunodeficiency virus 1]	47079033	2 (0 0 1 0 1)
keratin [Homo sapiens]	1200072	2 (1 1 0 0 0)
envelope glycoprotein [Human immunodeficiency virus type 1]	2641445	1 (0 1 0 0 0)
zinc finger protein 519 [Homo sapiens]	21686997	1 (0 1 0 0 0)
fatty acid binding protein 5 (psoriasis-associated) [Homo sapiens]	4557581	4 (0 3 1 0 0)
hypothetical protein (similar to Human CGI-32 protein [Streptococcus p	15674545	1 (0 1 0 0 0)
nef protein [Human immunodeficiency virus type 1] [M	4868235	1 (0 1 0 0 0)
envelope glycoprotein [Human immunodeficiency virus 1]	86753469	1 (0 1 0 0 0)
hCG1790787, isoform CRA_b [Homo sapiens]	119631971	1 (0 1 0 0 0)
protease [Human immunodeficiency virus 1]	33391641	1 (0 1 0 0 0)
vpu [Human immunodeficiency virus 1]	3287167	1 (0 1 0 0 0)
leucine-rich repeat LGI family, member 4 [Homo sapiens]	21281673	1 (0 1 0 0 0)
rhophilin, Rho GTPase binding protein 1, isoform CRA_e [Homo sapiens] [	119602661	1 (0 1 0 0 0)
envelope glycoprotein [Human immunodeficiency virus type 1]	1763509	1 (0 1 0 0 0)
unnamed protein product [Homo sapiens]	34534922	2 (0 1 0 1 0)
sarco/endoplasmic reticulum Ca2+ -ATPase [Homo sapiens]	3021396	1 (0 1 0 0 0)
LEU2_HUMAN Leukemia-associated protein 2 (Deleted in lymphocytic leukemia 2)	8928175	1 (0 1 0 0 0)
progesterone receptor membrane component 1 [Homo sapiens]	5729875	1 (0 1 0 0 0)
immunoglobuliln heavy chain variable region [Homo sapiens]	61608480	1 (0 1 0 0 0)
C8ORFK32 protein [Homo sapiens]	71296807	1 (0 1 0 0 0)
unknown [Homo sapiens]	62988643	1 (0 1 0 0 0)
fusion protein [Human parainfluenza virus 3]	222239	2 (0 0 1 0 1)
retinal outer segment membrane protein 1 [Homo sapiens]	4506575	1 (0 1 0 0 0)
immunoglobulin kappa light chain variable region [Homo sapiens]	47271300	1 (0 1 0 0 0)
hCG2038572 [Homo sapiens]	119600142	1 (0 1 0 0 0)
sialic acid binding Ig-like lectin 7 isoform 1 [Homo sapiens]	7657570	1 (0 1 0 0 0)
unknown [Homo sapiens]	2852648	1 (0 1 0 0 0)
putative TCPTP-interacting protein [Homo sapiens]	14270766	1 (0 1 0 0 0)
hypothetical protein [Homo sapiens]	34365377	1 (0 1 0 0 0)
nef protein [Human immunodeficiency virus 1]	109894046	1 (0 1 0 0 0)
gag protein [Human immunodeficiency virus 1]	47079055	1 (0 1 0 0 0)
GCN5 general control of amino-acid synthesis 5-like 2 (yeast), isoform	119581206	1 (0 1 0 0 0)
CXorf30 [Homo sapiens]	149588556	1 (0 1 0 0 0)
tat protein [Human immunodeficiency virus 1]	37682795	1 (0 1 0 0 0)
hypothetical protein [Homo sapiens]	12052814	1 (0 1 0 0 0)
envelope glycoprotein [Human immunodeficiency virus type 1]	14531913	1 (0 1 0 0 0)
unnamed protein product [Homo sapiens]	10438020	2 (0 0 0 2 0)
Homo sapiens zinc finger protein 202 [synthetic construct]	30585057	2 (0 2 0 0 0)
PDZ domain containing RING finger 3 [Homo sapiens]	57529737	4 (0 1 2 1 0)
AF289590_1 unknown [Homo sapiens]	18027384	3 (0 0 1 1 1)
C-type lectin domain family 3 member A [Homo sapiens]	148728186	6 (0 3 1 1 1)
envelope glycoprotein [Human immunodeficiency virus 1]	145306986	4 (1 0 0 2 1)
vif protein [Human immunodeficiency virus 1]	68521956	2 (0 1 1 0 0)
hypothetical protein LOC374977 [Homo sapiens]	86990452	2 (0 0 0 1 1)
protease [Human immunodeficiency virus 1]	24021322	2 (0 1 1 0 0)
hCG1645235, isoform CRA_b [Homo sapiens]	119592769	3 (0 1 1 1 0)
unnamed protein product [Homo sapiens]	28193162	2 (1 0 1 0 0)
KDEL1_HUMAN KDEL motif-containing protein 1 precursor	74749382	2 (1 0 1 0 0)
gp120 [Human immunodeficiency virus 1]	28172510	9 (0 4 2 2 1)
AF156064_1 pol protein [Human immunodeficiency virus type 1]	6446512	3 (0 1 0 2 0)
reverse transcriptase [Human immunodeficiency virus 1]	67080330	3 (2 0 0 1 0)
KIAA1152 protein [Homo sapiens]	6330095	2 (0 0 0 0 2)
envelope glycoprotein gp120 [Human immunodeficiency virus 1]	85663125	2 (0 0 0 0 2)
pol protein [Human immunodeficiency virus 1]	42717134	7 (0 2 0 2 3)
hypothetical protein [Homo sapiens]	51476547	3 (1 0 1 0 1)
nef protein [Human immunodeficiency virus 1]	90192289	2 (0 1 0 0 1)
reverse transcriptase [Human immunodeficiency virus 1]	71844956	2 (0 1 0 0 1)

## Sheet: Control_3_RIPA
Description	P (pro)	Score	MW	Accession	Peptide (Hits)
I38369 beta-tubulin - human (fragment)	2.31459e-11	100.185	48848.5	2119276	21 (17 1 2 0 1)
tubulin, beta 4 [Homo sapiens]	1.91104e-09	90.2112	49553.9	21361322	24 (16 7 0 1 0)
unknown [Homo sapiens]	1.70838e-08	90.1954	268547	62988842	9 (9 0 0 0 0)
Na+/K+ -ATPase alpha 2 subunit proprotein [Homo sapiens]	4.02404e-09	90.1788	112194	4502271	18 (14 2 0 0 2)
unnamed protein product [Homo sapiens]	4.55089e-07	86.2233	57919.5	28940	13 (11 0 0 1 1)
brain abundant, membrane attached signal protein 1 [Homo sapiens]	4.25159e-10	84.1909	22680	30795231	14 (11 2 1 0 0)
ATP synthase, H+ transporting, mitochondrial F1 complex, alpha subunit	3.31082e-11	80.2544	59713.7	4757810	13 (9 2 1 1 0)
proteolipid protein [Rattus norvegicus]	1.41917e-06	80.1948	30057.1	13591880	28 (28 0 0 0 0)
2',3'-cyclic-nucleotide 3'-phosphodiesterase (EC 3.1.4.37)	1.32906e-09	78.2247	45070.4	180687	13 (10 2 0 0 1)
neurofilament, medium polypeptide 150kDa [Homo sapiens]	1.1328e-09	76.2828	102386	4885513	13 (9 1 0 1 2)
tubulin alpha 6 [Homo sapiens]	2.4426e-09	76.2443	49863.5	14389309	23 (19 1 2 0 1)
brain creatine kinase [Homo sapiens]	2.44813e-07	66.1755	42617.4	21536286	11 (8 2 1 0 0)
neurofilament, light polypeptide 68kDa [Homo sapiens]	1.07633e-07	60.1593	61479.3	105990539	7 (7 0 0 0 0)
syntaxin binding protein 1 isoform a [Homo sapiens]	1.26884e-06	58.1212	68692.3	4507297	7 (5 1 0 1 0)
SPTAN1 protein [Homo sapiens]	0.00308399	56.1235	282106	31565122	6 (5 0 1 0 0)
dihydropyrimidinase-like 2 [Homo sapiens]	2.90977e-07	54.1652	62254.7	4503377	11 (10 0 0 1 0)
Na+/K+ -ATPase alpha 1 subunit isoform a proprotein [Homo sapiens]	5.44422e-05	54.1493	112824	21361181	7 (5 1 1 0 0)
myelin basic protein isoform 1 [Homo sapiens]	2.73031e-06	52.1936	21480	68509930	18 (13 3 0 0 2)
MDHM_HUMAN Malate dehydrogenase, mitochondrial precursor	7.47938e-06	52.1587	35508.8	6648067	7 (6 0 0 0 1)
GNAO2_HUMAN Guanine nucleotide-binding protein G(o) subunit alpha 2	5.70788e-05	50.1509	40061.1	60416433	8 (8 0 0 0 0)
glyceraldehyde-3-phosphate dehydrogenase [Homo sapiens]	1.38834e-07	48.1749	36030.4	7669492	7 (5 1 1 0 0)
glial fibrillary acidic protein [Homo sapiens]	4.30784e-05	48.1536	49849.7	4503979	6 (5 1 0 0 0)
A Chain A, Crystal Structure Of A DictyosteliumTETRAHYMENA CHIMERA Actin (Mutan	1.36188e-11	46.224	41719.9	7245526	11 (10 0 1 0 0)
enolase 2 [Homo sapiens]	6.87779e-08	46.1818	47239.1	5803011	5 (4 0 1 0 0)
Na+,K+ ATPase [Homo sapiens]	1.05708e-10	44.227	111901	1359715	8 (6 0 1 1 0)
Na+/K+ -ATPase beta 1 subunit isoform a [Homo sapiens]	0.000108134	44.136	35038.9	4502277	8 (7 0 0 1 0)
AT2B4_HUMAN Plasma membrane calcium-transporting ATPase 4 (PMCA4) (Plasma mem	6.7981e-07	40.1979	137833	14286105	4 (4 0 0 0 0)
A40671 dynamin, internal form 1, long C-terminal form - human [M	8.60584e-06	38.1549	97201	539580	4 (3 1 0 0 0)
tubulin, beta, 4 [Homo sapiens]	8.06507e-07	36.2415	50400.3	50592996	12 (4 6 1 1 0)
vesicle-associated membrane protein 2 (synaptobrevin 2) [Homo sapiens]	3.03535e-12	30.2286	12640.7	7657675	3 (3 0 0 0 0)
visinin-like 1 [Mus musculus]	1.35062e-08	30.1833	22128	6755983	3 (3 0 0 0 0)
heat shock 70kDa protein 8 isoform 2 [Homo sapiens]	0.000312518	30.1461	53484.5	24234686	3 (3 0 0 0 0)
tubulin, alpha 1B [Mus musculus]	7.26776e-10	28.2499	50119.6	34740335	8 (6 2 0 0 0)
DPYL4_HUMAN Dihydropyrimidinase-related protein 4 (DRP-4) (Collapsin response	0.000350724	28.0953	61838.5	68067941	4 (2 2 0 0 0)
microtubule-associated protein 2 [Homo sapiens]	0.00337126	28.0868	199045	1850617	4 (2 2 0 0 0)
ATPase, Ca++ transporting, cardiac muscle, slow twitch 2 isoform 1 [Ho	3.90469e-06	28.0725	114683	24638454	3 (2 1 0 0 0)
ras related v-ral simian leukemia viral oncogene homolog A [Homo sapie	0.0046603	26.1188	23552	33946329	3 (1 2 0 0 0)
collapsin response mediator protein 1 isoform 2 [Homo sapiens]	0.00201892	26.0933	62144.8	4503051	4 (1 3 0 0 0)
envelope glycoprotein [Human immunodeficiency virus 1]	0.00510591	26.0814	94152.1	86450888	3 (2 0 1 0 0)
L1 protein [Human papillomavirus type 106]	0.00458483	26.0633	63228.7	71726717	3 (1 2 0 0 0)
ATRB actin, skeletal muscle - rabbit	1.79137e-05	24.2119	41789.8	71611	7 (4 2 1 0 0)
KIAA0325 protein [Homo sapiens]	0.00110493	24.109	533404	71891782	4 (1 0 1 2 0)
regulator of G-protein signalling 9 isoform 1 [Homo sapiens]	0.00503759	24.0738	76917.1	126365761	3 (1 1 1 0 0)
tubulin, beta, 2 [Homo sapiens]	1.39436e-08	22.1799	49799	5174735	9 (1 3 5 0 0)
sirtuin 5 isoform 2 [Homo sapiens]	0.0055467	22.0807	32652.8	13787215	3 (2 0 0 0 1)
KIAA0358 [Homo sapiens]	0.0016084	22.0729	176077	40788225	3 (1 1 0 1 0)
unnamed protein product [Homo sapiens]	1.39436e-08	20.1803	49811	10433717	8 (5 0 3 0 0)
SYN2_HUMAN Synapsin-2 (Synapsin II)	3.62059e-08	20.1615	62928.8	6686022	2 (2 0 0 0 0)
phosphoglycerate mutase 1 (brain) [Homo sapiens]	1.77799e-06	20.1548	28785.8	4505753	2 (2 0 0 0 0)
CD9 antigen [Homo sapiens]	0.00112701	20.1509	25399	4502693	2 (2 0 0 0 0)
solute carrier family 25 (mitochondrial carrier; adenine nucleotide tr	7.4117e-07	20.1373	33043.2	55749577	3 (3 0 0 0 0)
guanine nucleotide-binding protein, beta-1 subunit [Mus musculus]	1.43478e-07	20.1373	37353	6680045	2 (2 0 0 0 0)
pyruvate kinase 3 isoform 1 [Homo sapiens]	6.48587e-06	20.135	57900.2	33286418	3 (3 0 0 0 0)
synaptotagmin I [Homo sapiens]	6.15095e-09	20.1341	47542.8	5032139	3 (3 0 0 0 0)
synapsin I isoform Ia [Homo sapiens]	3.52718e-05	20.129	74065.8	19924099	3 (3 0 0 0 0)
solute carrier family 17, member 7 [Homo sapiens]	0.00176976	20.1288	61573.3	9945322	10 (2 1 4 2 1)
Nogo-A protein [Homo sapiens]	0.00186574	20.1075	129861	9408096	2 (2 0 0 0 0)
myelin oligodendrocyte glycoprotein [Homo sapiens] [	0.0011793	20.1065	28175	793839	2 (2 0 0 0 0)
alpha 2 globin [Homo sapiens]	0.000495611	20.0994	15247.9	4504345	2 (2 0 0 0 0)
chaperonin [Homo sapiens]	0.00464456	20.0928	61016.5	31542947	2 (2 0 0 0 0)
RAB3A, member RAS oncogene family [Homo sapiens]	0.00220764	20.0888	24968.1	4506367	2 (2 0 0 0 0)
sperm antigen [Homo sapiens]	0.000759108	20.0777	84869.1	10798804	3 (1 0 1 1 0)
myristoylated alanine-rich protein kinase C substrate [Homo sapiens]	0.000789431	20.0769	31525.9	11125772	2 (2 0 0 0 0)
Chain , Aldolase A (E.C.4.1.2.13)	0.00454033	20.0758	39264.3	229674	2 (2 0 0 0 0)
STX1B_HUMAN Syntaxin-1B1 (Syntaxin 1B)	0.000519662	20.0741	33410.1	2501085	2 (2 0 0 0 0)
triosephosphate isomerase 1 [Homo sapiens]	0.00204785	20.0706	26652.7	4507645	2 (2 0 0 0 0)
KIAA0882 protein [Homo sapiens]	0.00809622	20.0684	146046	20521682	3 (1 1 0 0 1)
DCC_HUMAN Netrin receptor DCC precursor (Tumor suppressor protein DCC) (Colore	0.00126149	20.0664	158357	1169233	2 (2 0 0 0 0)
unnamed protein product [Homo sapiens]	0.00504725	20.0656	45838.5	22760155	2 (2 0 0 0 0)
envelope glycoprotein [Human immunodeficiency virus 1]	0.00707803	20.0583	39264.9	61741750	2 (2 0 0 0 0)
histone H2B [Homo sapiens]	1.96252e-07	18.2313	13927.6	1568557	2 (1 1 0 0 0)
Raichu404X [Homo sapiens]	2.16801e-05	18.1295	84962	14595132	2 (1 1 0 0 0)
oligodendrocyte myelin glycoprotein [Homo sapiens]	0.000228663	18.0799	49576.3	52426787	2 (1 1 0 0 0)
CE152_HUMAN Centrosomal protein of 152 kDa (Cep152 protein)	0.000581073	18.0771	147252	62286590	2 (1 1 0 0 0)
nebulette sarcomeric isoform [Homo sapiens]	0.000741709	18.0678	116380	5453758	3 (1 0 0 2 0)
KRHU2 keratin 1, type II, cytoskeletal - human	0.00729875	18.0639	65454.4	7428712	3 (1 1 1 0 0)
truncated gag protein [Human immunodeficiency virus 1]	0.0082761	18.0536	11015.6	73913195	2 (1 1 0 0 0)
IQGA3_HUMAN Ras GTPase-activating-like protein IQGAP3	0.00203131	18.0526	184431	49036087	3 (0 2 0 0 1)
fascin 1 [Homo sapiens]	6.47763e-10	16.1812	54496.1	4507115	2 (1 0 1 0 0)
sirtuin 2 isoform 1 [Homo sapiens]	4.68674e-07	16.1343	43154.5	13775600	2 (1 0 1 0 0)
F-box and leucine-rich repeat protein 18 [Homo sapiens]	0.00116922	16.1119	73111.8	21361981	2 (1 0 1 0 0)
similar to t-complex 1; T-complex locus TCP-1; t-complex 1 (a murine tcp	0.00357167	16.0903	19812.7	51094756	10 (4 5 1 0 0)
B Chain B, T-To-T(High) Quaternary Transitions In Human Hemoglobin: Deshis146b	0.000179892	16.0897	15720.2	61679604	3 (1 0 2 0 0)
MUCB_HUMAN Ig mu heavy chain disease protein (BOT)	0.00780498	16.0887	43030.3	127506	2 (1 0 1 0 0)
glutamate transporter [Homo sapiens]	0.00073223	16.0864	61664.6	488752	3 (1 1 1 0 0)
DHPR_HUMAN Dihydropteridine reductase (HDHPR) (Quinoid dihydropteridine redu	0.000817181	16.0845	25773	118572639	2 (1 0 1 0 0)
KIAA0987 protein [Homo sapiens]	0.00351134	16.0808	123629	4589618	2 (1 0 1 0 0)
KIAA1000 protein [Homo sapiens]	0.00610985	16.0759	225676	27529750	2 (1 0 1 0 0)
envelope glycoprotein precursor gp160 [Human immunodeficiency virus 1]	0.00648909	16.0648	97208.3	5931489	5 (0 2 0 3 0)
SHPS1_HUMAN Tyrosine-protein phosphatase non-receptor type substrate 1 precur	3.769e-05	16.0644	54778.7	29427656	2 (1 0 1 0 0)
AF-6 [Homo sapiens]	0.00535435	16.0616	181786	3452574	2 (1 0 1 0 0)
hCG2041433 [Homo sapiens]	0.0093947	16.0615	17874.1	119590516	2 (1 0 1 0 0)
clathrin heavy chain 1 [Homo sapiens]	5.45445e-06	14.1332	191492	4758012	2 (1 0 0 1 0)
hypothetical protein DDBDRAFT_0217499 [Dictyostelium discoideum AX4]	0.00950868	14.0838	103787	66820851	2 (0 1 1 0 0)
AF154671_1 CRB1 [Homo sapiens]	0.0030833	14.0815	151312	6014482	2 (0 1 1 0 0)
unnamed protein product [Homo sapiens]	0.000174415	14.0696	34862.2	10439382	2 (0 1 1 0 0)
calnexin precursor [Homo sapiens]	6.27984e-06	14.0652	67526	10716563	2 (1 0 0 1 0)
KIAA0318 [Homo sapiens]	0.00409533	14.0648	122245	2224577	2 (1 0 0 1 0)
dynein, axonemal, heavy chain 3 [Homo sapiens]	0.0064201	14.0597	470467	24308169	2 (0 1 1 0 0)
CD92 protein [Homo sapiens]	0.00143912	14.058	72933.4	16945323	2 (1 0 0 1 0)
AF170039_1 envelope glycoprotein [Human immunodeficiency virus type 2] [M	0.00792026	14.0482	53799.8	11990532	2 (0 1 1 0 0)
SI:dZ87I4.1 (novel protein similar to human signal transducer and activ	0.00583821	12.0928	132636	22316176	2 (0 1 0 1 0)
adducin 2 isoform a [Homo sapiens]	6.28299e-05	12.0857	80803.4	9257192	2 (1 0 0 0 1)
hCG1790806, isoform CRA_a [Homo sapiens]	0.00219476	12.064	28752	119628831	2 (1 0 0 0 1)
neural cell adhesion molecule 1 isoform 3 [Homo sapiens]	0.0012134	12.0516	83718	115529478	2 (1 0 0 0 1)
ras homolog gene family, member H [Homo sapiens]	0.00328886	12.0477	21316.8	4757770	2 (0 0 2 0 0)
hypothetical protein [Homo sapiens]	0.00232245	12.0314	120235	50949774	2 (0 1 0 1 0)
histone H2A [Homo sapiens]	2.47949e-09	10.2689	13986.8	28195394	1 (1 0 0 0 0)
tubulin, alpha 1a [Mus musculus]	1.41558e-06	10.2144	49927.7	6678465	1 (1 0 0 0 0)
delta globin [Homo sapiens]	2.5675e-11	10.2073	16045.3	4504351	2 (2 0 0 0 0)
AF470976_1 pol polyprotein [Human immunodeficiency virus type 1]	0.000904562	10.1757	41160.8	21686054	2 (1 1 0 0 0)
H2A histone family, member A [Homo sapiens]	2.05397e-05	10.1657	14127	10645195	2 (2 0 0 0 0)
citrate synthase precursor, isoform a [Homo sapiens]	1.50889e-08	10.1591	51679.6	38327625	1 (1 0 0 0 0)
SH3-domain GRB2-like 2 [Homo sapiens]	2.18297e-05	10.135	39937.1	4506931	1 (1 0 0 0 0)
A Chain A, Crystal Structure Of Human Cd81 Extracellular Domain, A Receptor Fo	7.16967e-06	10.1335	9898.87	13399775	1 (1 0 0 0 0)
calmodulin [Homo sapiens]	0.00491278	10.1287	17152	825635	1 (1 0 0 0 0)
tubulin polymerization promoting protein [Homo sapiens]	0.000374083	10.1264	23679.2	5902018	1 (1 0 0 0 0)
tyrosine 3/tryptophan 5 -monooxygenase activation protein, zeta polypep	1.24276e-05	10.1258	27727.7	4507953	2 (2 0 0 0 0)
actinin, alpha 1 [Homo sapiens]	0.000775884	10.1255	102993	4501891	1 (1 0 0 0 0)
hypothetical protein LOC345651 [Homo sapiens]	0.00190166	10.1254	41976	63055057	4 (0 3 0 0 1)
gelsolin isoform a precursor [Homo sapiens]	8.53911e-08	10.1231	85644.2	4504165	1 (1 0 0 0 0)
A Chain A, Crystal Structure Of Caenorhabditis Elegans Mg-Atp Actin Complexed	3.75655e-06	10.1204	41637.7	14278147	1 (1 0 0 0 0)
surface antigen [Human herpesvirus 5]	0.00665701	10.1184	13187.1	6687684	1 (1 0 0 0 0)
c-K-ras2 protein isoform a [Homo sapiens]	0.000288515	10.1143	21642	15718763	1 (1 0 0 0 0)
tubulin, beta 2 [Homo sapiens]	2.59133e-07	10.1129	49875	4507729	2 (2 0 0 0 0)
alpha-spectrin [Homo sapiens]	9.99847e-07	10.1126	43790.8	829111	1 (1 0 0 0 0)
clusterin isoform 2 [Homo sapiens]	0.000970337	10.1125	52461.1	42740907	2 (1 0 0 0 1)
envelope glycoprotein [Human immunodeficiency virus 1]	4.48552e-06	10.1113	12813.2	118427012	2 (2 0 0 0 0)
acetoacetyl-CoA synthetase [Homo sapiens]	0.000159132	10.1112	75096.1	31982927	1 (1 0 0 0 0)
reticulon 1 isoform A [Homo sapiens]	3.94627e-05	10.1105	83566.2	10863935	1 (1 0 0 0 0)
reverse transcriptase [Human immunodeficiency virus 1]	0.00723146	10.1104	26718.4	10504907	1 (1 0 0 0 0)
envelope glycoprotein [Human immunodeficiency virus 1]	0.00581607	10.1095	14948.8	145694135	2 (1 1 0 0 0)
prosaposin isoform a preproprotein [Homo sapiens]	0.000226562	10.1077	58073.9	11386147	2 (2 0 0 0 0)
guanine nucleotide binding protein (G protein), gamma 3 subunit [Mus mu	0.00140578	10.1048	8299.16	6754022	1 (1 0 0 0 0)
phosphoglycerate mutase 2 (muscle) [Homo sapiens] [	3.89586e-05	10.1047	28201.4	51094513	2 (2 0 0 0 0)
unnamed protein product [Homo sapiens]	0.00356378	10.1026	14736.4	10435535	2 (1 0 1 0 0)
GTPase, IMAP family member 7 [Homo sapiens]	0.00141848	10.1005	34486.8	23397516	1 (1 0 0 0 0)
envelope glycoprotein [Human immunodeficiency virus 1]	0.000503134	10.0993	37260.8	73763859	1 (1 0 0 0 0)
peptidylprolyl isomerase A [Mus musculus]	0.000916243	10.0977	17959.8	6679439	1 (1 0 0 0 0)
synaptosomal-associated protein 25 isoform SNAP25A [Homo sapiens]	0.000299064	10.0949	23321.2	18765733	1 (1 0 0 0 0)
Chain , Human Rhoa Complexed With Gtp Analogue	0.000136682	10.0917	20557.3	3318980	1 (1 0 0 0 0)
ubiquitin carboxyl-terminal esterase L1 (ubiquitin thiolesterase) [Hom	0.00495161	10.0909	24808.5	21361091	1 (1 0 0 0 0)
KIAA0570 protein [Homo sapiens]	0.00256224	10.0868	388908	20521085	2 (2 0 0 0 0)
C-type lectin domain family 3 member A [Homo sapiens]	0.00284874	10.0868	22218.5	148728186	1 (1 0 0 0 0)
envelope glycoprotein [Human immunodeficiency virus 1]	0.000752935	10.0868	6337.19	10504340	1 (1 0 0 0 0)
BRCA1 protein [Homo sapiens]	0.00102639	10.086	150217	92096024	1 (1 0 0 0 0)
crystallin, alpha B [Homo sapiens]	0.00112323	10.084	20146.4	4503057	1 (1 0 0 0 0)
immunoglobulin alpha heavy chain variable region [Homo sapiens]	0.000994798	10.0837	14011.9	62871218	3 (2 1 0 0 0)
heat shock 70kDa protein 5 [Homo sapiens]	0.000937491	10.0836	72288.5	16507237	2 (2 0 0 0 0)
tyrosine 3-monooxygenase/tryptophan 5-monooxygenase activation protein,	0.0013852	10.0833	28284.9	9507245	1 (1 0 0 0 0)
Chain , Human Serum Albumin In A Complex With Myristic Acid And Tri-Iodobenz	0.000572288	10.0829	65992.9	4389275	1 (1 0 0 0 0)
LATS, large tumor suppressor, homolog 2 [Homo sapiens]	0.000969074	10.082	120060	126507091	1 (1 0 0 0 0)
protein phosphatase 1 glycogen-binding regulatory subunit 3 [Homo sapie	0.00063367	10.082	125759	4506011	1 (1 0 0 0 0)
peroxiredoxin 3 isoform a precursor [Homo sapiens]	0.000365211	10.0814	27675.2	5802974	2 (1 0 0 0 1)
guanine nucleotide binding protein, alpha activating polypeptide O [Ho	0.000607535	10.08	40024.9	10567816	1 (1 0 0 0 0)
ATP synthase, H+ transporting, mitochondrial F1 complex, beta subunit	0.000162532	10.0795	56524.7	32189394	1 (1 0 0 0 0)
lanthionine synthetase C-like protein 1 [Homo sapiens]	5.99117e-05	10.0779	45253.6	5174445	1 (1 0 0 0 0)
VDAC2 [Homo sapiens]	0.00367534	10.0778	30393	48146045	1 (1 0 0 0 0)
KIAA1202 protein [Homo sapiens]	0.0036505	10.0776	165847	6330422	3 (1 0 1 1 0)
hypothetical protein [Homo sapiens]	0.00130756	10.0774	96685.5	21740179	1 (1 0 0 0 0)
Thy-1 cell surface antigen [Homo sapiens]	0.0015049	10.0772	17923.3	19923362	1 (1 0 0 0 0)
hypothetical protein [Homo sapiens]	0.00231339	10.077	19883.3	6808196	1 (1 0 0 0 0)
pol protein [Human immunodeficiency virus 1]	0.00294778	10.0763	112725	38892600	3 (0 0 1 2 0)
gag protein [Human immunodeficiency virus 1]	0.00819502	10.0756	55156.1	124389826	1 (1 0 0 0 0)
chromosome 10 open reading frame 93 [Homo sapiens]	0.00491275	10.0748	43019.9	119581714	2 (1 0 1 0 0)
orthologue of H. sapiens chromosome 20 open reading frame 174 (C20orf1	0.00783146	10.0746	170454	147223370	1 (1 0 0 0 0)
unnamed protein product [Homo sapiens]	0.00188501	10.0734	46800.1	21753491	3 (2 0 0 1 0)
myelin basic protein isoform 4 [Homo sapiens]	0.000464579	10.0729	17332.8	68509932	2 (1 0 0 0 1)
LRRC37A3 protein [Homo sapiens]	0.00134065	10.0721	71713.8	117414125	1 (1 0 0 0 0)
pol protein [Human immunodeficiency virus 1]	0.000268048	10.0719	11824.5	46369813	1 (1 0 0 0 0)
H2A histone family, member O [Homo sapiens]	0.00490442	10.0715	14086.9	4504251	1 (1 0 0 0 0)
OVCA1=candidate tumor suppressor [human, fetal brain, Peptide, 443 aa] [M	0.00799056	10.071	48820.3	1438796	1 (1 0 0 0 0)
DCRR1 [Homo sapiens]	0.00121715	10.0695	220057	2662364	1 (1 0 0 0 0)
reverse transcriptase [Human immunodeficiency virus 1]	0.00476485	10.0687	27551.3	118639830	9 (4 0 1 4 0)
pol protein [Human immunodeficiency virus 1]	0.00295333	10.0686	38620.4	148923957	1 (1 0 0 0 0)
unnamed protein product [Homo sapiens]	0.000951949	10.0681	15345	34530880	7 (4 0 1 1 1)
3-hydroxyanthranilate 3,4-dioxygenase [Homo sapiens]	0.00979775	10.0668	32521.5	6912406	1 (1 0 0 0 0)
envelope glycoprotein [Human immunodeficiency virus 1]	0.00269598	10.0668	95467.1	82571237	1 (1 0 0 0 0)
envelope glycoprotein [Human immunodeficiency virus 1]	0.0023077	10.0663	96370.3	83854089	2 (0 1 0 0 1)
ADT3_HUMAN ADP/ATP translocase 3 (Adenine nucleotide translocator 2) (ANT 3) (A	0.000913872	10.0662	32845.2	113463	1 (1 0 0 0 0)
excision repair cross-complementing rodent repair deficiency, complemen	0.00337539	10.0659	89221.1	4557563	1 (1 0 0 0 0)
MARCS_HUMAN Myristoylated alanine-rich C-kinase substrate (MARCKS) (Protein k	0.0008436	10.0656	31535.9	76803798	1 (1 0 0 0 0)
KIAA1379 protein [Homo sapiens]	0.000762476	10.0647	52337.5	20521900	1 (1 0 0 0 0)
fatty acid binding protein 3 [Homo sapiens]	0.00144964	10.0645	14848.7	4758328	3 (2 0 0 0 1)
hypothetical protein LOC146705 [Homo sapiens]	0.000657966	10.0644	55102.8	21389577	1 (1 0 0 0 0)
EPB41L3 protein [Homo sapiens]	0.00037718	10.063	96454.3	13544009	1 (1 0 0 0 0)
NF-kappaB activating protein [Homo sapiens]	0.00178729	10.0626	47080.1	13375676	1 (1 0 0 0 0)
hypothetical protein DKFZp586I1420 [Homo sapiens] [	0.0093986	10.0622	14961.3	51105870	1 (1 0 0 0 0)
Chain , Human Complement Regulatory Protein Cd59 (Extracellular Region, Resid	0.00250755	10.0614	8080.61	515118	1 (1 0 0 0 0)
brain link protein-1 [Homo sapiens]	0.00896467	10.0613	37751.1	11141887	1 (1 0 0 0 0)
familial acute myelogenous leukemia related factor [Homo sapiens]	0.00101848	10.0606	9547.89	125950493	2 (1 1 0 0 0)
inhibitor of kappa light polypeptide gene enhancer in B-cells, kinase	0.00342011	10.0589	86508.8	41352712	1 (1 0 0 0 0)
A45023 lamin B2 - human (fragment)	0.00796907	10.0586	58965	345758	1 (1 0 0 0 0)
envelope glycoprotein [Human immunodeficiency virus 1]	0.000972029	10.057	12247.7	87246693	2 (0 1 0 0 1)
complement component 1, q subcomponent, A chain precursor [Homo sapiens	0.00390619	10.057	26000.2	7705753	1 (1 0 0 0 0)
mitochondrial ATP synthase, O subunit precursor [Homo sapiens]	0.00120411	10.0565	23262.7	4502303	1 (1 0 0 0 0)
MORC family CW-type zinc finger 3 [Homo sapiens]	0.00561952	10.0564	107045	28872812	1 (1 0 0 0 0)
CA147_HUMAN Uncharacterized protein C1orf147	0.00558715	10.0563	29821.8	110832779	1 (1 0 0 0 0)
coagulation factor VIII isoform a precursor [Homo sapiens]	0.00806304	10.0553	266839	4503647	3 (0 0 1 0 2)
glutathione S-transferase [Homo sapiens]	0.000127696	10.0551	25540.8	31935	1 (1 0 0 0 0)
rev protein [Human immunodeficiency virus 1]	0.00370438	10.0548	11910.2	26245454	1 (1 0 0 0 0)
immunoglobulin kappa light chain variable region [Homo sapiens]	0.0053539	10.0528	11870.8	98956370	1 (1 0 0 0 0)
hypothetical protein LOC51252, isoform CRA_b [Homo sapiens]	0.00810039	10.0523	81620.9	119591728	1 (1 0 0 0 0)
hCG2041414 [Homo sapiens]	0.00519387	10.0517	8246.13	119623057	1 (1 0 0 0 0)
transforming growth factor, beta receptor II (70/80kDa), isoform CRA_b	0.000635401	10.0517	15590	119584815	2 (1 1 0 0 0)
FELE-1 [Homo sapiens]	0.00885096	10.0517	275266	22779437	1 (1 0 0 0 0)
AF101466_1 envelope glycoprotein [Human immunodeficiency virus type 1] [MA	0.00238964	10.0514	39303.6	4754084	1 (1 0 0 0 0)
6-phosphofructo-2-kinase/fructose-2,6-biphosphatase 3 [Homo sapiens]	0.000718009	10.0513	59571.3	4758900	1 (1 0 0 0 0)
VP1 [Human echovirus 15]	0.000635345	10.0504	12945.3	73671473	1 (1 0 0 0 0)
unnamed protein product [Homo sapiens]	0.00503917	10.0502	126814	10440043	1 (1 0 0 0 0)
Heat shock 27kDa protein 1 [Homo sapiens]	0.00838147	10.0498	22754.5	15126735	1 (1 0 0 0 0)
AF137807_1 envelope glycoprotein [Human immunodeficiency virus type 1] [MA	0.00659021	10.0496	22786.3	6940996	1 (1 0 0 0 0)
unnamed protein product [Homo sapiens]	0.00753148	10.0495	62138	22760610	1 (1 0 0 0 0)
cyclic AMP phosphoprotein, 19 kD [Homo sapiens]	0.00127522	10.0495	12315.3	5729732	1 (1 0 0 0 0)
ribosomal protein S6 kinase, 90kDa, polypeptide 6 [Homo sapiens]	0.00172172	10.048	83818.6	7657526	2 (0 1 0 0 1)
AF430691_1 T cell receptor beta variable region [Homo sapiens]	0.00933802	10.0478	13165.6	16566902	1 (1 0 0 0 0)
KIAA0319 [Homo sapiens]	0.00601833	10.0463	117689	134304840	1 (1 0 0 0 0)
bromodomain containing 7 [Homo sapiens]	0.00384527	10.0459	74092.3	41350212	1 (1 0 0 0 0)
Fucosyltransferase 11 (alpha (1,3) fucosyltransferase) [Homo sapiens]	0.00262006	10.0451	55764.7	23271236	1 (1 0 0 0 0)
envelope glycoprotein [Human immunodeficiency virus 1]	0.0062643	10.0414	31382.4	45446223	1 (1 0 0 0 0)
hCG1805190 [Homo sapiens]	0.00590255	10.0404	4970.66	119579872	1 (1 0 0 0 0)
hCG2042166 [Homo sapiens]	0.00824892	10.0401	23852.3	119581869	1 (1 0 0 0 0)
hemoglobin beta chain [Homo sapiens]	0.000505339	10.0341	4510.41	33694204	1 (1 0 0 0 0)
hSMP-1 [Homo sapiens]	0.00923711	10.0332	55043.7	1836035	1 (1 0 0 0 0)
hCG2013081 [Homo sapiens]	0.00161575	10.0308	10382.3	119629577	1 (1 0 0 0 0)
AF166179_1 polyprotein [Human coxsackievirus A9]	0.000102172	8.13229	14925.1	6752481	2 (1 1 0 0 0)
neurolysin [Homo sapiens]	0.00282814	8.13142	80599.8	14149738	3 (1 0 1 0 1)
AF166172_1 polyprotein [Human coxsackievirus A9]	0.00254585	8.12857	14943.1	6752467	2 (1 1 0 0 0)
protease [Human immunodeficiency virus 1]	0.00240983	8.12664	10708.9	63015070	1 (0 1 0 0 0)
S31503 H+/K+-exchanging ATPase (EC 3.6.3.10) ATP1AL1 - human (fragment)	0.00460866	8.11864	10485.2	346261	3 (1 1 0 1 0)
KIAA1708 [Homo sapiens]	0.000759675	8.11391	185022	30725047	5 (0 0 3 1 1)
TBB4Q_HUMAN Tubulin beta-4q chain	0.00123825	8.10938	48403.5	12643363	1 (0 1 0 0 0)
beta B3 crystallin [Homo sapiens]	0.000810329	8.10682	17326.6	27526410	1 (0 1 0 0 0)
envelope glycoprotein [Human immunodeficiency virus 1]	0.00723146	8.10581	12569.7	87246582	2 (0 1 0 1 0)
unnamed protein product [Homo sapiens]	0.000524601	8.1038	69882	47077429	2 (0 2 0 0 0)
envelope glycoprotein [Human immunodeficiency virus 1]	0.000503134	8.0993	37252.6	73763857	1 (0 1 0 0 0)
unnamed protein product [Homo sapiens]	0.0017032	8.09915	21628.2	28207945	1 (0 1 0 0 0)
immunoglobulin heavy chain variable region [Homo sapiens]	0.00299391	8.09602	10855.2	112700376	1 (0 1 0 0 0)
envelope glycoprotein [Human immunodeficiency virus 1]	0.00704036	8.09412	12798.8	148789768	1 (0 1 0 0 0)
envelope glycoprotein [Human immunodeficiency virus 1]	0.00263896	8.09411	10842.7	37695090	2 (0 0 1 0 1)
unnamed protein product [Homo sapiens]	0.00383565	8.09134	50621.8	10435466	3 (1 1 0 1 0)
lin 7 homolog c [Mus musculus]	0.00596721	8.09077	21820.5	6755973	3 (0 1 2 0 0)
hCG2038511 [Homo sapiens]	0.00969534	8.08958	13751	119569905	1 (0 1 0 0 0)
ribosomal protein S16 [Homo sapiens]	0.000323764	8.08886	16435	4506691	1 (0 1 0 0 0)
protein-tyrosine phosphatase, PTPase {clone F36-15} [human, leukemia cell	0.0095023	8.08509	13999.7	300038	1 (0 1 0 0 0)
LIN9 protein [Homo sapiens]	0.0010893	8.08114	62005.1	34783601	1 (0 1 0 0 0)
ras homolog gene family, member B [Homo sapiens]	0.00739685	8.08104	22109.1	4757764	1 (0 1 0 0 0)
reverse transcriptase [Human immunodeficiency virus 1]	0.000763585	8.07959	22563.8	67080330	2 (0 1 0 1 0)
reverse transcriptase [Human immunodeficiency virus 1]	0.00292462	8.07777	24165.8	3858975	2 (0 0 1 0 1)
dipeptidyl peptidase 8 isoform 3 [Homo sapiens]	0.00187889	8.07764	103293	37577089	1 (0 1 0 0 0)
immunoglobulin heavy chain variable region [Homo sapiens]	0.000285631	8.07632	9653.58	19773134	1 (0 1 0 0 0)
KIAA0597 protein [Homo sapiens]	0.00795225	8.07289	108769	3043718	1 (0 1 0 0 0)
NBEA_HUMAN Protein neurobeachin (Lysosomal-trafficking regulator 2) (Protein	0.00640029	8.07254	327602	32171483	2 (0 0 0 2 0)
pol protein [Human immunodeficiency virus 1]	0.000268048	8.07187	11798.4	46369757	1 (0 1 0 0 0)
TOR2A_HUMAN Torsin-2A precursor (Torsin family 2 member A) (Torsin-related pr	0.00582185	8.07157	35691.5	74742272	1 (0 1 0 0 0)
gamma-aminobutyric acid A receptor, alpha 2 precursor [Homo sapiens]	0.00849749	8.07062	51306.4	4557601	1 (0 1 0 0 0)
immunoglobulin heavy chain variable region [Homo sapiens]	0.00694508	8.07011	13003.2	118405943	1 (0 1 0 0 0)
envelope protein [Human immunodeficiency virus 1]	0.00184518	8.06781	13465	138752693	1 (0 1 0 0 0)
hnRNP U protein [Homo sapiens]	0.00037119	8.06752	88890.2	32358	1 (0 1 0 0 0)
olfactory receptor, family 6, subfamily N, member 1 [Homo sapiens]	0.00437298	8.06672	34845.5	52353276	14 (4 4 1 1 4)
immunoglobulin heavy chain variable region [Homo sapiens]	0.00171419	8.06638	13948.7	122892386	1 (0 1 0 0 0)
envelope glycoprotein [Human immunodeficiency virus 1]	0.00671089	8.06503	12258.3	67944163	1 (0 1 0 0 0)
keratin [Homo sapiens]	0.00729875	8.06392	51303.3	1200072	2 (0 2 0 0 0)
hypothetical protein [Homo sapiens]	0.0049556	8.06307	98424.5	12053121	1 (0 1 0 0 0)
envelope glycoprotein [Human immunodeficiency virus 1]	0.000182198	8.06206	13434.2	28864025	1 (0 1 0 0 0)
solute carrier family 25, member 5 [Homo sapiens]	0.00507913	8.06099	32874.2	4502099	1 (0 1 0 0 0)
gag polyprotein [Human T-lymphotropic virus 2]	0.00476842	8.06095	47997.7	9626727	1 (0 1 0 0 0)
envelope glycoprotein [Human immunodeficiency virus 1]	8.82275e-07	8.06013	21380.4	33637984	1 (0 1 0 0 0)
pol protein [Human immunodeficiency virus 1]	0.00310605	8.05875	114506	68521995	1 (0 1 0 0 0)
polyubiquitin [Homo sapiens]	0.00523998	8.05705	68450.1	2627129	1 (0 1 0 0 0)
SET and MYND domain containing 1, isoform CRA_a [Homo sapiens]	0.00942904	8.05629	58737	119597483	1 (0 1 0 0 0)
gp120 protein [Human immunodeficiency virus 1] [MA	0.00860665	8.05628	23062.5	34786338	1 (0 1 0 0 0)
unnamed protein product [Homo sapiens]	0.00521356	8.05498	20336.4	21749774	1 (0 1 0 0 0)
unnamed protein product [Homo sapiens]	0.00123967	8.05481	81763.6	21755403	1 (0 1 0 0 0)
rev protein [Human immunodeficiency virus type 1] [	0.00370438	8.05434	11812.1	17046893	1 (0 1 0 0 0)
envelope glycoprotein [Human immunodeficiency virus 1]	0.00850771	8.05298	97959.2	90993469	5 (0 0 2 1 2)
AF245505_1 adlican [Homo sapiens]	0.00311894	8.05199	312097	9280405	2 (0 0 0 2 0)
hCG1795875, isoform CRA_b [Homo sapiens]	0.00633592	8.05175	24965.6	119614863	1 (0 1 0 0 0)
KIF27B [Homo sapiens]	0.00283342	8.04914	152219	30025501	1 (0 1 0 0 0)
envelope glycoprotein [Human immunodeficiency virus 1]	0.00368899	8.048	13055.6	30144199	2 (0 1 0 1 0)
serine palmitoyltransferase, long chain base subunit 2 [Homo sapiens]	0.00129993	8.04779	62884	4758668	2 (0 0 1 0 1)
KIAA0956 protein [Homo sapiens]	0.0043657	8.04576	76311.4	4589556	1 (0 1 0 0 0)
FLJ00229 protein [Homo sapiens]	0.00226172	8.04487	71507.6	18676660	1 (0 1 0 0 0)
SIRP-beta1 [Homo sapiens]	0.00337175	8.04427	43227	2052058	1 (0 1 0 0 0)
envelope glycoprotein [Human immunodeficiency virus 1]	0.00907347	8.04171	22543.1	38349294	2 (0 0 1 0 1)
beta-actin [Homo sapiens]	0.00615186	8.03892	7793.88	178024	1 (0 1 0 0 0)
cadherin FIB1 [Homo sapiens]	0.00643581	8.03682	14528.3	2250692	1 (0 1 0 0 0)
polyprotein [Human coxsackievirus A10]	0.00343001	8.03092	26912.3	42662123	1 (0 1 0 0 0)
reverse transcriptase [Human immunodeficiency virus 1]	0.00990046	8.02915	23854.3	80973155	1 (0 1 0 0 0)
hypothetical protein [Human calicivirus Hu/NLV/Queen's Arms/Leeds/92/UK	0.00138299	6.13271	22089.1	14330431	2 (0 1 1 0 0)
envelope glycoprotein [Human immunodeficiency virus 1]	0.00618687	6.11996	31845	99029604	8 (3 2 1 1 1)
parkin isoform 3 [Homo sapiens]	0.00845849	6.10194	35616.9	7669540	6 (0 4 2 0 0)
immunoglobulin heavy chain variable region [Homo sapiens]	0.00169494	6.06062	12954.1	54145431	4 (1 1 1 1 0)
BGRF1/BDRF1 [Human herpesvirus 4 type 1]	0.000513792	6.05164	76645.5	82503246	2 (0 0 0 1 1)
hCG1773636 [Homo sapiens]	0.0089889	4.10975	20494.8	119578198	2 (0 1 0 1 0)
TPA: ovochymase precursor [Homo sapiens]	0.00818935	4.0431	124948	33186810	2 (0 0 0 0 2)
KIAA1245 protein [Homo sapiens]	0.00167846	2.08307	159321	40789051	2 (1 0 0 0 1)
LYSM4_HUMAN LysM and putative peptidoglycan-binding domain-containing protein	74736222	1 (1 0 0 0 0)
nucleophosmin (nucleolar phosphoprotein B23, numatrin), isoform CRA_d [	119581851	1 (1 0 0 0 0)
hypothetical protein [Homo sapiens]	68161840	1 (1 0 0 0 0)
hypothetical protein [Homo sapiens]	21740133	1 (1 0 0 0 0)
A Chain A, Human Centrin 2 Xeroderma Pigmentosum Group C Protein Complex	99032537	2 (0 1 0 0 1)
envelope glycoprotein [Human immunodeficiency virus type 1]	2190754	1 (1 0 0 0 0)
S100 calcium-binding protein, beta [Homo sapiens]	5454034	1 (1 0 0 0 0)
AF061264_1 brain my025 [Homo sapiens]	12001992	1 (1 0 0 0 0)
PRRT3 protein [Homo sapiens]	71296793	1 (1 0 0 0 0)
unnamed protein product [Homo sapiens]	7022776	2 (0 0 1 1 0)
envelope glycoprotein [Human immunodeficiency virus type 1]	2231606	1 (1 0 0 0 0)
1D-myo-inositol-trisphosphate 3-kinase A [Homo sapiens]	4504789	1 (1 0 0 0 0)
TRS1 [Human herpesvirus 5 strain AD169]	9625873	1 (1 0 0 0 0)
regulatory factor X3 isoform a [Homo sapiens]	4506495	1 (1 0 0 0 0)
AF308301_1 serologically defined breast cancer antigen NY-BR-87 [Homo sap	12060853	1 (1 0 0 0 0)
CCDC63 protein [Homo sapiens]	112180480	1 (1 0 0 0 0)
CDC14C protein [Homo sapiens]	34192046	1 (1 0 0 0 0)
KIAA0641 protein [Homo sapiens]	20521115	1 (1 0 0 0 0)
hCG2008629 [Homo sapiens]	119592755	1 (1 0 0 0 0)
neurotensin receptor 1 [Homo sapiens]	110611243	1 (1 0 0 0 0)
AF208851_1 BM-009 [Homo sapiens]	7582290	1 (1 0 0 0 0)
pol protein [Human immunodeficiency virus 1]	125632934	1 (1 0 0 0 0)
SWI/SNF complex 60 KDa subunit [Homo sapiens]	1549243	1 (1 0 0 0 0)
ABCBB_HUMAN Bile salt export pump (ATP-binding cassette sub-family B member 1	12643301	1 (1 0 0 0 0)
S31503 H+/K+-exchanging ATPase (EC 3.6.3.10) ATP1AL1 - human (fragment)	346261	1 (0 1 0 0 0)
hemoglobin beta chain [Homo sapiens]	66731527	1 (0 1 0 0 0)
neurolysin [Homo sapiens]	14149738	4 (1 2 1 0 0)
hCG1985816 [Homo sapiens]	119620010	1 (0 1 0 0 0)
B Chain B, Crystal Structure Of Human Hemoglobin E At 1.73 A Resolution	46014946	1 (0 1 0 0 0)
gp160 [Human immunodeficiency virus 1]	18996234	1 (0 1 0 0 0)
envelope glycoprotein [Human immunodeficiency virus type 1]	13774683	1 (0 1 0 0 0)
hCG2030248 [Homo sapiens]	119567955	1 (0 1 0 0 0)
AF407157_1 envelope glycoprotein [Human immunodeficiency virus type 1] [M	21616403	1 (0 1 0 0 0)
chordin-like 2, isoform CRA_a [Homo sapiens]	119595350	1 (0 1 0 0 0)
rho GDP dissociation inhibitor (GDI) [Homo sapiens] [	36038	1 (0 1 0 0 0)
transmembrane protein 84, isoform CRA_b [Homo sapiens]	119598240	1 (0 1 0 0 0)
zinc finger protein 336 [Homo sapiens]	11968150	1 (0 1 0 0 0)
immunoglobulin kappa chain variable region [Homo sapiens]	77379448	1 (0 1 0 0 0)
envelope glycoprotein [Human immunodeficiency virus 1]	8920124	1 (0 1 0 0 0)
hCG2007372 [Homo sapiens]	119629874	1 (0 1 0 0 0)
nebulette sarcomeric isoform [Homo sapiens]	5453758	2 (0 2 0 0 0)
leucine rich repeat containing 57, isoform CRA_b [Homo sapiens]	119612967	1 (0 1 0 0 0)
envelope glycoprotein precursor gp160 [Human immunodeficiency virus 1]	71794620	3 (0 1 0 2 0)
beta globin chain variant [Homo sapiens]	26892090	1 (0 1 0 0 0)
immunoglobulin heavy chain variable region [Homo sapiens]	4837899	1 (0 1 0 0 0)
Kv channel interacting protein 2 transcript variant 9 [Homo sapiens] [M	114150680	1 (0 1 0 0 0)
neuropeptide Y receptor Y2 [Homo sapiens]	4505447	1 (0 1 0 0 0)
hCG1814009 [Homo sapiens]	119578230	1 (0 1 0 0 0)
immunoglobulin heavy chain variable region [Homo sapiens]	5441380	1 (0 1 0 0 0)
2'-5' oligoadenylate binding protein; endoribonuclease [Homo sapiens] [MA	608723	2 (0 0 0 2 0)
immunoglobulin heavy chain CDR3 region [Homo sapiens]	4098844	1 (0 1 0 0 0)
hCG2007637, isoform CRA_a [Homo sapiens]	119629769	2 (0 1 0 1 0)
hypothetical protein DDBDRAFT_0206578 [Dictyostelium discoideum AX4]	66823609	1 (0 1 0 0 0)
PO-GA [Homo sapiens]	296908	1 (0 1 0 0 0)
unnamed protein product [Homo sapiens]	34532462	1 (0 1 0 0 0)
hypothetical protein [Homo sapiens]	6807875	1 (0 1 0 0 0)
alkB, alkylation repair homolog 6 isoform 1 [Homo sapiens]	38570140	2 (0 1 1 0 0)
hCG2036928, isoform CRA_b [Homo sapiens]	119629008	1 (0 1 0 0 0)
unnamed protein product [Homo sapiens]	28375587	1 (0 1 0 0 0)
unnamed protein product [Homo sapiens]	7020422	2 (0 0 1 0 1)
calcium-binding tyrosine phosphorylation-regulated protein isoform d [	24797110	1 (0 1 0 0 0)
immunoglobulin lambda light chain variable region [Homo sapiens]	27369044	1 (0 1 0 0 0)
ciliary neurotrophic factor receptor preproprotein [Homo sapiens]	4502931	1 (0 1 0 0 0)
unnamed protein product [Homo sapiens]	21755426	2 (0 0 1 0 1)
hypothetical protein [Homo sapiens]	34366433	1 (0 1 0 0 0)
non-structural protein; Ha [Human astrovirus]	21069099	1 (0 1 0 0 0)
conserved gene telomeric to alpha globin cluster isoform 1 [Homo s	116292162	1 (0 1 0 0 0)
unnamed protein product [Homo sapiens]	47077351	1 (0 1 0 0 0)
AF154671_1 CRB1 [Homo sapiens]	6014482	1 (0 1 0 0 0)
KIAA1047 protein [Homo sapiens]	29421188	2 (0 0 0 2 0)
A57644 Na+/H+-exchanging protein 2 - human	2135788	1 (0 1 0 0 0)
hypothetical protein [Homo sapiens]	21740279	2 (0 0 0 2 0)
envelope glycoprotein [Human immunodeficiency virus type 2]	2655119	1 (0 1 0 0 0)
zinc finger protein 42 [Homo sapiens]	89179323	1 (0 1 0 0 0)
NOL1/NOP2/Sun domain family 4 protein [Homo sapiens]	40316918	1 (0 1 0 0 0)
envelope polyprotein [Human immunodeficiency virus type 1]	327643	1 (0 1 0 0 0)
envelope glycoprotein [Human immunodeficiency virus 1]	99029702	1 (0 1 0 0 0)
pol protein [Human immunodeficiency virus 1]	116277812	1 (0 1 0 0 0)
AF309431_1 gag protein [Human immunodeficiency virus type 1]	12239553	1 (0 1 0 0 0)
KIAA1693 protein [Homo sapiens]	12697931	1 (0 1 0 0 0)
fiber protein [Human adenovirus C]	9626185	1 (0 1 0 0 0)
unnamed protein product [Homo sapiens]	10433112	1 (0 1 0 0 0)
LYAG_HUMAN Lysosomal alpha-glucosidase precursor (Acid maltase) (Aglucosidase a	126590	1 (0 1 0 0 0)
unnamed protein product [Homo sapiens]	14042447	3 (0 0 0 2 1)
envelope glycoprotein [Human immunodeficiency virus 1]	119874387	1 (0 1 0 0 0)
AF471381_1 Ig heavy chain variable region, VH3 family [Homo sapiens] [MAS	33319306	2 (0 0 1 0 1)
SPB11_HUMAN Serpin B11	20140144	1 (0 1 0 0 0)
envelope glycoprotein [Human immunodeficiency virus 1]	63014585	1 (0 1 0 0 0)
leucine rich repeat containing 20, isoform CRA_e [Homo sapiens]	119574780	1 (0 1 0 0 0)
CAB2 [Homo sapiens]	27808402	1 (0 1 0 0 0)
thrombospondin repeat containing 1 isoform 2 [Homo sapiens]	56788359	1 (0 1 0 0 0)
prostatic binding protein [Homo sapiens]	4505621	1 (0 1 0 0 0)
envelope glycoprotein [Human immunodeficiency virus type 1]	13506279	1 (0 1 0 0 0)
immunoglobulin heavy chain [Homo sapiens]	46254075	1 (0 1 0 0 0)
hypothetical protein PY00695 [Plasmodium yoelii yoelii str. 17XNL]	82596589	1 (0 1 0 0 0)
human KRIT 1 (Krev interaction trapped/cerebral cavernous malformat	71997281	1 (0 1 0 0 0)
unnamed protein product [Homo sapiens]	34533183	1 (0 1 0 0 0)
striatin [Homo sapiens]	2828318	1 (0 1 0 0 0)
AF233648_1 pregnancy-induced hypertension syndrome-related protein [Homo s	7341265	1 (0 1 0 0 0)
exocyst complex component 7 isoform a [Homo sapiens]	62241046	1 (0 1 0 0 0)
KIAA0608 protein [Homo sapiens]	3043740	1 (0 1 0 0 0)
hCG2042692 [Homo sapiens]	119571855	1 (0 1 0 0 0)
debranching enzyme homolog 1 [Homo sapiens]	56549113	1 (0 1 0 0 0)
Bloom syndrome protein [Homo sapiens]	4557365	3 (0 0 0 2 1)
AF353325_1 envelope glycoprotein [Human immunodeficiency virus type 1] [M	13898744	2 (1 0 1 0 0)
CNTP4_HUMAN Contactin-associated protein-like 4 precursor (Cell recognition m	17433039	2 (0 0 0 1 1)
MGC31957 protein [Homo sapiens]	13477163	2 (0 0 0 1 1)
VCLJSP env polyprotein - human foamy virus	74720	3 (1 1 1 0 0)
immunoglobulin alpha heavy chain variable region [Homo sapiens]	62871218	6 (1 3 0 1 1)
hCG2042551 [Homo sapiens]	119616889	2 (0 1 0 0 1)
flavin containing monooxygenase 1 [Homo sapiens]	4503755	2 (0 1 0 0 1)

## Sheet: Control_4_RIPA
Description	P (pro)	Score	MW	Accession	Peptide (Hits)
SPTAN1 protein [Homo sapiens]	3.02941e-08	314.219	282106	31565122	37 (30 5 0 2 0)
unknown [Homo sapiens]	2.78888e-13	196.235	268547	62988842	25 (21 2 0 2 0)
I38369 beta-tubulin - human (fragment)	1.18316e-12	172.274	48848.5	2119276	29 (22 2 2 2 1)
Na+/K+ -ATPase alpha 2 subunit proprotein [Homo sapiens]	3.63709e-12	150.248	112194	4502271	32 (25 4 3 0 0)
Na+,K+ ATPase [Homo sapiens]	2.78153e-07	150.214	111901	1359715	19 (15 3 0 1 0)
syntaxin binding protein 1 isoform a [Homo sapiens]	6.74794e-11	148.225	68692.3	4507297	22 (18 3 0 0 1)
Na+/K+ -ATPase alpha 1 subunit isoform a proprotein [Homo sapiens]	7.77156e-15	146.241	112824	21361181	19 (17 2 0 0 0)
brain abundant, membrane attached signal protein 1 [Homo sapiens]	1e-30	138.267	22680	30795231	28 (24 3 1 0 0)
unnamed protein product [Homo sapiens]	3.44451e-11	134.244	57919.5	28940	20 (18 1 1 0 0)
neurofilament, medium polypeptide 150kDa [Homo sapiens]	7.07778e-12	130.283	102386	4885513	18 (13 1 1 1 2)
2',3'-cyclic-nucleotide 3'-phosphodiesterase (EC 3.1.4.37)	5.59133e-07	130.19	45070.4	180687	16 (13 1 2 0 0)
myelin basic protein isoform 1 [Homo sapiens]	1.11013e-06	130.174	21480	68509930	35 (29 4 1 0 1)
ATP synthase, H+ transporting, mitochondrial F1 complex, alpha subunit	7.3387e-09	126.212	59713.7	4757810	18 (17 0 1 0 0)
clathrin heavy chain 1 [Homo sapiens]	6.33167e-08	120.158	191492	4758012	15 (12 0 0 2 1)
microtubule-associated protein 1B isoform 1 [Homo sapiens]	9.30044e-07	118.158	270452	5174525	13 (11 1 1 0 0)
dihydropyrimidinase-like 2 [Homo sapiens]	4.39065e-11	106.211	62254.7	4503377	15 (12 0 2 1 0)
tubulin alpha 6 [Homo sapiens]	1.91879e-08	104.239	49863.5	14389309	24 (21 1 0 2 0)
Chain , Aldolase A (E.C.4.1.2.13)	4.39249e-09	104.172	39264.3	229674	14 (11 2 0 1 0)
brain creatine kinase [Homo sapiens]	7.27484e-10	102.25	42617.4	21536286	16 (14 1 0 1 0)
aconitase 2 precursor [Homo sapiens]	2.01698e-07	102.201	85372	4501867	12 (10 1 0 1 0)
N Chain N, Mutant Monomer Of Recombinant Human Hexokinase Type I Complexed With	3.22343e-06	100.199	102383	7245424	11 (11 0 0 0 0)
MDHM_HUMAN Malate dehydrogenase, mitochondrial precursor	1.8343e-11	94.217	35508.8	6648067	15 (12 1 2 0 0)
neurofilament, light polypeptide 68kDa [Homo sapiens]	1.42778e-07	92.2106	61479.3	105990539	12 (9 2 1 0 0)
proteolipid protein [Rattus norvegicus]	6.14998e-08	90.2088	30057.1	13591880	39 (33 2 2 2 0)
internexin neuronal intermediate filament protein, alpha [Homo sapiens	0.00456951	90.0984	55357.5	14249342	10 (6 3 1 0 0)
GNAO2_HUMAN Guanine nucleotide-binding protein G(o) subunit alpha 2	1.90216e-10	88.2043	40061.1	60416433	13 (10 3 0 0 0)
tubulin, beta 4 [Homo sapiens]	6.43271e-09	86.2292	49553.9	21361322	24 (17 6 1 0 0)
Na+/K+ -ATPase beta 1 subunit isoform a [Homo sapiens]	5.26923e-07	86.2105	35038.9	4502277	21 (19 0 1 0 1)
STX1B_HUMAN Syntaxin-1B1 (Syntaxin 1B)	9.12493e-10	82.2071	33410.1	2501085	11 (8 2 1 0 0)
KIAA0325 protein [Homo sapiens]	0.000276523	82.1221	533404	71891782	13 (5 4 0 1 3)
glial fibrillary acidic protein [Homo sapiens]	1.32282e-09	80.2001	49849.7	4503979	13 (8 1 0 2 2)
KIAA0987 protein [Homo sapiens]	4.60478e-06	80.1184	123629	4589618	10 (6 1 1 1 1)
A Chain A, Crystal Structure Of A DictyosteliumTETRAHYMENA CHIMERA Actin (Mutan	1.71028e-11	78.2634	41719.9	7245526	19 (14 5 0 0 0)
neural cell adhesion molecule 1 isoform 3 [Homo sapiens]	3.67906e-08	70.2174	83718	115529478	12 (11 1 0 0 0)
reticulon 1 isoform A [Homo sapiens]	1.435e-08	68.1801	83566.2	10863935	10 (8 1 0 0 1)
contactin 1 isoform 1 precursor [Homo sapiens]	1.40628e-07	66.2024	113249	28373117	8 (5 1 1 0 1)
ATRB actin, skeletal muscle - rabbit	1.75362e-05	66.1926	41789.8	71611	22 (16 5 1 0 0)
chaperonin [Homo sapiens]	3.65328e-07	64.1754	61016.5	31542947	8 (6 1 1 0 0)
glutamate transporter [Homo sapiens]	9.75743e-08	62.2585	61664.6	488752	9 (7 0 0 0 2)
N-ethylmaleimide sensitive fusion protein attachment protein beta [Mus	0.00329571	60.119	33535.5	29789104	6 (6 0 0 0 0)
ANK2_HUMAN Ankyrin-2 (Brain ankyrin) (Ankyrin-B) (Ankyrin, nonerythroid)	2.14207e-05	58.1651	430079	1703310	7 (3 3 0 1 0)
B46091 H+-exporting ATPase (EC 3.6.3.6) chain A, vacuolar (VA68 type) - human	8.24078e-07	54.1703	68204.5	1082432	6 (5 0 0 1 0)
G02520 plectin - human	0.00268723	54.1688	518172	7442004	8 (3 1 1 2 1)
synaptotagmin I [Homo sapiens]	9.74798e-11	50.2965	47542.8	5032139	6 (6 0 0 0 0)
myelin oligodendrocyte glycoprotein [Homo sapiens] [M	5.10324e-08	50.1966	28175	793839	7 (6 1 0 0 0)
solute carrier family 25 (mitochondrial carrier; adenine nucleotide tr	1.44544e-06	50.1539	33043.2	55749577	6 (6 0 0 0 0)
enolase 2 [Homo sapiens]	2.62857e-09	48.2454	47239.1	5803011	9 (7 2 0 0 0)
tubulin, beta, 4 [Homo sapiens]	1.58862e-09	48.2045	50400.3	50592996	12 (6 4 1 1 0)
prostatic binding protein [Homo sapiens]	1.85444e-08	48.2004	21043.7	4505621	7 (6 1 0 0 0)
tyrosine 3/tryptophan 5 -monooxygenase activation protein, epsilon poly	9.20399e-08	48.1868	29155.4	5803225	5 (4 1 0 0 0)
glyceraldehyde-3-phosphate dehydrogenase [Homo sapiens]	1.91887e-09	48.1592	36030.4	7669492	9 (7 2 0 0 0)
EAA1_HUMAN Excitatory amino acid transporter 1 (Solute carrier family 1 member	3.9781e-05	48.1366	59533.8	1169458	7 (5 1 1 0 0)
heat shock 90kDa protein 1, beta [Homo sapiens]	7.84039e-12	46.245	83212.2	20149594	6 (4 2 0 0 0)
SYN2_HUMAN Synapsin-2 (Synapsin II)	8.94811e-07	46.2347	62928.8	6686022	5 (4 0 1 0 0)
ras homolog gene family, member B [Homo sapiens]	1.20328e-07	46.1308	22109.1	4757764	6 (4 0 0 1 1)
annexin VI isoform 1 [Homo sapiens]	4.37643e-05	46.1217	75825.7	71773329	7 (4 0 0 0 3)
hypothetical protein [Homo sapiens]	0.000426404	46.1101	113923	21732286	8 (4 0 1 2 1)
ATP synthase, H+ transporting, mitochondrial F0 complex, subunit d isof	0.000489556	46.1022	18479.5	5453559	6 (5 0 1 0 0)
unnamed protein product [Homo sapiens]	4.78225e-09	44.207	49811	10433717	10 (3 2 4 1 0)
ubiquinol-cytochrome c reductase core protein II [Homo sapiens]	1.14548e-07	44.1648	48412.9	50592988	6 (5 0 0 1 0)
Protein kinase primarily involved in telomere length regulation; contri	0.0063492	44.1088	321362	6319383	7 (2 2 1 0 2)
KIAA0177 protein [Homo sapiens]	0.00914016	44.0963	192804	27529698	7 (0 5 2 0 0)
guanine nucleotide-binding protein, beta-2 subunit [Mus musculus]	1.22288e-08	40.2449	37307.1	13937391	5 (5 0 0 0 0)
heat shock 70kDa protein 5 [Homo sapiens]	2.10609e-11	40.208	72288.5	16507237	6 (4 1 0 0 1)
guanine nucleotide-binding protein, beta-1 subunit [Mus musculus]	1.01275e-11	40.2008	37353	6680045	7 (6 0 1 0 0)
pyruvate kinase 3 isoform 1 [Homo sapiens]	5.13957e-08	40.1924	57900.2	33286418	5 (5 0 0 0 0)
VDAC2 [Homo sapiens]	8.76724e-08	40.1812	30393	48146045	4 (4 0 0 0 0)
mitochondrial ATP synthase, O subunit precursor [Homo sapiens]	1.93181e-07	40.1712	23262.7	4502303	7 (4 1 0 0 2)
A40671 dynamin, internal form 1, long C-terminal form - human [M	3.85391e-08	40.1614	97201	539580	5 (5 0 0 0 0)
R Chain R, Twinning In Crystals Of Human Skeletal Muscle D- Glyceraldehyde-3-Pho	9.61448e-08	40.1566	35853.3	230867	8 (6 0 1 1 0)
B Chain B, T-To-T(High) Quaternary Transitions In Human Hemoglobin: Deshis146b	4.39167e-08	40.1493	15720.2	61679604	7 (6 1 0 0 0)
proteoglycan PG-M(V3) [Homo sapiens]	5.3469e-05	38.1427	74200.6	1008913	5 (4 1 0 0 0)
bridging integrator 1 isoform 1 [Homo sapiens]	6.08565e-05	38.0911	64659.6	21536400	4 (3 1 0 0 0)
ubiquinol-cytochrome c reductase core protein I [Homo sapiens]	5.32685e-12	36.1933	52612.5	46593007	5 (2 1 1 0 1)
KIAA1087 protein [Homo sapiens]	8.96755e-06	36.1499	103374	5689511	4 (3 0 1 0 0)
SHPS1_HUMAN Tyrosine-protein phosphatase non-receptor type substrate 1 precur	5.55249e-06	36.148	54778.7	29427656	4 (3 0 1 0 0)
glycoprotein M6A isoform 1 [Homo sapiens]	5.44764e-05	36.1365	31188.4	14149619	5 (4 0 1 0 0)
tubulin, alpha-like 3 [Homo sapiens]	0.000262677	36.1091	49876.8	13376181	5 (2 3 0 0 0)
H+-ATP synthase subunit b [Homo sapiens]	0.00105905	34.1295	28876.3	509291	4 (2 1 1 0 0)
KIAA1281 protein [Homo sapiens]	0.00709751	34.0874	164647	20521822	4 (2 1 1 0 0)
ATPase, H+ transporting, lysosomal 50/57kDa, V1 subunit H isoform 2 [H	0.000864919	34.0787	55847.1	47717102	5 (1 1 2 1 0)
cell cycle exit and neuronal differentiation 1 [Homo sapiens]	7.79021e-11	32.22	14944.8	30795225	6 (2 1 1 1 1)
synaptosomal-associated protein 25 isoform SNAP25A [Homo sapiens]	8.55505e-05	32.1838	23321.2	18765733	9 (7 0 0 1 1)
tubulin, alpha 1B [Mus musculus]	1.1483e-11	30.2663	50119.6	34740335	7 (7 0 0 0 0)
vesicle-associated membrane protein 2 (synaptobrevin 2) [Homo sapiens]	2.39808e-13	30.2615	12640.7	7657675	7 (7 0 0 0 0)
histone H2B [Homo sapiens]	8.91e-10	30.2269	13927.6	1568557	5 (3 1 0 0 1)
tubulin polymerization promoting protein [Homo sapiens]	5.46184e-08	30.2127	23679.2	5902018	3 (3 0 0 0 0)
syntaxin 1A (brain) [Homo sapiens]	6.39027e-05	30.2066	33002.7	4759182	3 (3 0 0 0 0)
N-myc downstream-regulated gene 2 isoform a [Homo sapiens]	1.00057e-09	30.2053	40772.2	42544211	3 (3 0 0 0 0)
heat shock 70kDa protein 6 (HSP70B') [Homo sapiens]	2.11643e-06	30.1773	70984.4	34419635	3 (3 0 0 0 0)
IMMT_HUMAN Mitochondrial inner membrane protein (Mitofilin) (p87/89) (Prolife	6.765e-06	30.162	83626.5	29427676	3 (3 0 0 0 0)
Thy-1 cell surface antigen [Homo sapiens]	1.90047e-06	30.1607	17923.3	19923362	5 (5 0 0 0 0)
ATP synthase, H+ transporting, mitochondrial F0 complex, subunit F6 is	1.30646e-05	30.1597	12579.6	18644883	3 (3 0 0 0 0)
tubulin, beta 2 [Homo sapiens]	1.05982e-05	30.1567	49875	4507729	5 (5 0 0 0 0)
heat shock 70kDa protein 8 isoform 2 [Homo sapiens]	0.000135841	30.1565	53484.5	24234686	3 (3 0 0 0 0)
alpha-spectrin [Homo sapiens]	2.97984e-06	30.1509	43790.8	829111	3 (3 0 0 0 0)
KIAA1379 protein [Homo sapiens]	1.11513e-07	30.1506	52337.5	20521900	3 (3 0 0 0 0)
heat shock protein 90kDa alpha (cytosolic), class A member 1 isoform 2	1.62837e-06	30.1477	84620.7	40254816	3 (3 0 0 0 0)
AT2B4_HUMAN Plasma membrane calcium-transporting ATPase 4 (PMCA4) (Plasma mem	7.73434e-07	30.1477	137833	14286105	4 (4 0 0 0 0)
microtubule-associated protein 2 [Homo sapiens]	0.000969268	30.1446	199045	1850617	4 (2 0 1 1 0)
peptidylprolyl isomerase A [Mus musculus]	1.28823e-07	30.1445	17959.8	6679439	4 (4 0 0 0 0)
actinin, alpha 1 [Homo sapiens]	0.000163636	30.1389	102993	4501891	4 (2 0 1 1 0)
structural maintenance of chromosomes 2-like 1 [Homo sapiens]	0.00737225	30.1233	135572	110347418	6 (1 1 0 2 2)
A Chain A, Human Heart L-Lactate Dehydrogenase H Chain, Ternary Complex With N	3.91385e-06	30.1216	36484.1	13786847	3 (3 0 0 0 0)
claudin 11 [Homo sapiens]	0.00461805	30.1208	21978.4	10938016	3 (3 0 0 0 0)
guanine nucleotide binding protein (G protein), alpha inhibiting activi	0.00398588	30.1125	40425.1	4504041	3 (3 0 0 0 0)
neural cell adhesion molecule 1, isoform CRA_a [Homo sapiens]	0.000662192	30.1073	119374	119587605	4 (4 0 0 0 0)
fatty acid omega-hydroxylase [Homo sapiens]	0.00794114	30.0822	59591.2	535787	3 (3 0 0 0 0)
helicase, lymphoid-specific [Homo sapiens]	0.0019686	30.0782	97012.3	21914927	4 (0 3 1 0 0)
peroxiredoxin 5 precursor, isoform a [Homo sapiens]	8.9354e-09	28.1995	22012.5	6912238	3 (2 1 0 0 0)
synapsin I isoform Ia [Homo sapiens]	4.19042e-07	28.1592	74065.8	19924099	3 (2 1 0 0 0)
clusterin isoform 2 [Homo sapiens]	0.000320157	28.1424	52461.1	42740907	3 (2 1 0 0 0)
triosephosphate isomerase 1 [Homo sapiens]	0.00011661	28.142	26652.7	4507645	5 (4 1 0 0 0)
alpha 2 globin [Homo sapiens]	6.77865e-07	28.1327	15247.9	4504345	4 (2 2 0 0 0)
Raichu404X [Homo sapiens]	4.90397e-05	28.1316	84962	14595132	3 (2 1 0 0 0)
enolase 1 [Homo sapiens]	5.23305e-07	28.1273	47139.4	4503571	6 (3 3 0 0 0)
paralemin [Homo sapiens]	6.59774e-05	28.1213	37104.5	4186043	4 (2 1 0 0 1)
growth associated protein 43 [Homo sapiens]	0.00115355	28.1212	24787.9	4503911	4 (2 0 1 0 1)
glucose phosphate isomerase [Homo sapiens]	0.000117238	28.1132	63107.3	18201905	3 (2 1 0 0 0)
HSP71_HUMAN Heat shock 70 kDa protein 1 (HSP70.1) (HSP70-1/HSP70-2)	6.82896e-05	28.1101	70009.2	147744565	3 (2 1 0 0 0)
Z804B_HUMAN Zinc finger protein 804B	0.00147252	28.0996	152442	148887330	9 (2 1 1 2 3)
MAON_HUMAN NADP-dependent malic enzyme, mitochondrial precursor (NADP-ME) (Mal	0.00131539	28.0817	67011.7	2497786	5 (0 2 3 0 0)
v-maf musculoaponeurotic fibrosarcoma oncogene homolog G [Homo sapiens]	0.00959114	28.0731	17838.7	4505073	3 (2 1 0 0 0)
heat shock 70kDa protein 9B precursor [Homo sapiens]	9.07804e-07	26.1918	73634.8	24234688	3 (2 0 1 0 0)
cofilin 1 (non-muscle) [Homo sapiens]	0.000510058	26.1791	18490.7	5031635	3 (2 0 1 0 0)
laminin, beta 4 [Homo sapiens]	0.00145968	26.1283	193412	143770880	6 (1 1 0 4 0)
G01650 malate dehydrogenase (EC 1.1.1.37), cytosolic - human [M	3.01289e-06	26.0961	36392	7431153	4 (3 0 1 0 0)
semaphorin F homolog [Homo sapiens]	0.00409644	26.0874	120493	2772584	3 (1 2 0 0 0)
ribokinase [Homo sapiens]	0.00706158	26.0811	34121.3	11545855	4 (1 1 1 0 1)
A59255 myosin VIIa, long form - human	0.00271776	26.0538	249910	11360310	4 (1 1 0 2 0)
tubulin, beta, 2 [Homo sapiens]	2.45619e-08	24.2122	49799	5174735	6 (2 3 1 0 0)
synaptotagmin V [Homo sapiens]	5.1532e-05	24.1911	42873.5	92859638	3 (2 0 0 1 0)
KIAA0756 splice variant 1 [Homo sapiens]	5.36833e-06	24.1202	94362.5	54633206	3 (2 0 0 1 0)
cell adhesion molecule 3 [Homo sapiens]	2.71801e-07	24.1069	46991.5	11056046	3 (2 0 0 1 0)
brevican isoform 1 [Homo sapiens]	5.31116e-06	24.1002	99056.2	38372935	4 (1 2 1 0 0)
KIAA0445 protein [Homo sapiens]	0.00948219	24.0943	217700	29421172	3 (2 0 0 1 0)
envelope protein [Human immunodeficiency virus 1] [	0.000364426	24.0761	98272.2	38892661	3 (1 1 1 0 0)
prosaposin isoform a preproprotein [Homo sapiens]	1.77076e-07	22.1608	58073.9	11386147	7 (6 0 0 0 1)
unnamed protein product [Homo sapiens]	1.38339e-07	22.1603	40203.1	22760099	4 (3 0 0 0 1)
fructose bisphosphate aldolase [Homo sapiens]	0.000137409	22.1504	39417.2	312137	3 (2 0 0 0 1)
myristoylated alanine-rich protein kinase C substrate [Homo sapiens]	1.00641e-05	22.1367	31525.9	11125772	4 (3 0 0 0 1)
unnamed protein product [Homo sapiens]	0.00172322	22.1211	55559.6	10438086	3 (2 0 0 0 1)
unnamed protein product [Homo sapiens]	0.00899632	22.1017	44559.3	21758528	4 (0 2 2 0 0)
plasma membrane calcium ATPase 2 isoform 1 [Homo sapiens]	0.00599909	22.0943	136790	48255951	3 (2 0 0 0 1)
cytochrome P450, family 24 precursor [Homo sapiens]	1.86053e-05	22.0839	58837.6	55770850	3 (1 1 0 1 0)
ZFHX4_HUMAN Zinc finger homeobox protein 4 (Zinc finger homeodomain protein 4	0.000342479	22.0835	393482	74762449	4 (0 1 2 0 1)
PTN14_HUMAN Tyrosine-protein phosphatase non-receptor type 14 (Protein-tyrosin	0.00877794	22.0822	135153	2493258	3 (2 0 0 0 1)
DKFZP586J0619 protein [Homo sapiens]	0.000304382	22.0758	265586	51094692	4 (0 1 1 2 0)
SMRC1_HUMAN SWI/SNF-related matrix-associated actin-dependent regulator of ch	0.00205644	22.0721	122676	57012964	3 (1 1 0 1 0)
hypothetical protein [Homo sapiens]	0.00227284	22.0692	120235	50949774	3 (1 0 2 0 0)
translocase of outer mitochondrial membrane 70 homolog A [Homo sapiens	3.33067e-15	20.2699	67412.2	54607135	2 (2 0 0 0 0)
guanine nucleotide binding protein, alpha activating polypeptide O [Ho	3.48669e-10	20.2556	40024.9	10567816	3 (3 0 0 0 0)
H2A histone family, member Z [Homo sapiens]	2.7508e-11	20.2285	13544.5	4504255	3 (3 0 0 0 0)
sarco/endoplasmic reticulum Ca2+ -ATPase [Homo sapiens]	6.13688e-07	20.2164	112442	3021396	2 (2 0 0 0 0)
hypothetical protein ( (L11645) alpha-tubulin [Homo sapiens] ) [Neuros	1.89043e-09	20.207	10326.7	85091443	2 (2 0 0 0 0)
calmodulin [Homo sapiens]	2.14707e-09	20.206	17152	825635	5 (5 0 0 0 0)
visinin-like 1 [Mus musculus]	8.79938e-08	20.2035	22128	6755983	4 (4 0 0 0 0)
gelsolin isoform a precursor [Homo sapiens]	6.96059e-07	20.2025	85644.2	4504165	2 (2 0 0 0 0)
tyrosine 3/tryptophan 5 -monooxygenase activation protein, zeta polypep	1.98299e-06	20.197	27727.7	4507953	2 (2 0 0 0 0)
Nogo-A protein [Homo sapiens]	3.96817e-07	20.1909	129861	9408096	2 (2 0 0 0 0)
KIAA0968 protein [Homo sapiens]	1.04561e-11	20.1881	58985.2	4589580	2 (2 0 0 0 0)
DHPR_HUMAN Dihydropteridine reductase (HDHPR) (Quinoid dihydropteridine redu	1.57501e-06	20.1846	25773	118572639	3 (2 0 1 0 0)
ENO1B_HUMAN Alpha-enolase, lung specific (2-phospho-D-glycerate hydro-lyase) (N	5.12195e-10	20.1814	49446.4	729422	2 (2 0 0 0 0)
CD9 antigen [Homo sapiens]	7.8586e-08	20.1764	25399	4502693	4 (4 0 0 0 0)
tenascin-R [Homo sapiens]	7.84302e-08	20.1675	149479	1617316	3 (2 0 0 1 0)
calreticulin precursor [Homo sapiens]	3.53735e-05	20.1666	48111.9	4757900	2 (2 0 0 0 0)
cytochrome c oxidase subunit Vb precursor [Homo sapiens]	3.08041e-09	20.1655	13686.9	17017988	3 (1 0 1 1 0)
adaptor-related protein complex 2, alpha 2 subunit [Homo sapiens]	0.000154931	20.1611	103895	27477041	2 (2 0 0 0 0)
Manganese superoxide dismutase [Homo sapiens]	3.53533e-07	20.1593	24694.5	34707	4 (2 0 0 0 2)
AP1B1_HUMAN AP-1 complex subunit beta-1 (Adapter-related protein complex 1 bet	1.91307e-05	20.1538	104540	1703167	2 (2 0 0 0 0)
guanine nucleotide binding protein (G protein), gamma 3 subunit [Mus mu	3.59782e-05	20.1535	8299.16	6754022	3 (3 0 0 0 0)
hypothetical protein [Homo sapiens]	2.95486e-06	20.1513	47524.3	21739836	2 (2 0 0 0 0)
peroxiredoxin 3 isoform a precursor [Homo sapiens]	1.16541e-05	20.146	27675.2	5802974	2 (2 0 0 0 0)
B Chain B, X-Ray Crystal Structure Of Human Galectin-1	1.71574e-06	20.1355	14575.2	42542978	2 (2 0 0 0 0)
alpha-synuclein isoform NACP140 [Homo sapiens]	9.22594e-05	20.1344	14451.2	4507109	2 (2 0 0 0 0)
AJHUQ glutamate-ammonia ligase (EC 6.3.1.2) - human	1.46077e-05	20.133	42138.4	25754242	2 (2 0 0 0 0)
glycoprotein M6B isoform 3 [Homo sapiens]	0.00365262	20.1322	28969.2	24307895	2 (2 0 0 0 0)
unnamed protein product [Homo sapiens]	0.000131378	20.1313	35738.8	32486	2 (2 0 0 0 0)
amine oxidase (flavin-containing) [Homo sapiens]	0.00270102	20.126	58725.2	38202207	2 (2 0 0 0 0)
heavy neurofilament subunit [Homo sapiens]	2.4673e-06	20.1207	111713	1841430	4 (2 1 0 0 1)
synaptophysin [Homo sapiens]	0.000898221	20.1184	32083.5	899301	3 (3 0 0 0 0)
dihydrolipoamide dehydrogenase precursor [Homo sapiens]	4.74729e-05	20.1133	54143.1	91199540	2 (2 0 0 0 0)
NADH dehydrogenase (ubiquinone) 1 alpha subcomplex, 4, 9kDa [Homo sapie	2.98646e-05	20.1108	9363.91	4505357	2 (2 0 0 0 0)
cytochrome c oxidase subunit VIb [Homo sapiens]	1.15643e-06	20.1105	10185.7	4502985	3 (1 1 0 0 1)
signal-regulatory protein alpha precursor [Homo sapiens]	3.2234e-05	20.1065	54932.9	18426911	2 (2 0 0 0 0)
fiber protein [Human adenovirus type 51]	0.00790655	20.0954	33799.6	82523553	3 (1 1 0 0 1)
chondroitin 6-sulfotransferase [Homo sapiens]	0.00474919	20.0946	54638.4	3510308	5 (2 0 3 0 0)
hCG2040559 [Homo sapiens]	0.0066782	20.094	23254.8	119614033	3 (0 2 0 1 0)
A Chain A, Human Vimentin Coil 2b Fragment (Cys2)	0.00578927	20.0914	9901.82	20149836	3 (3 0 0 0 0)
MEMD protein [Homo sapiens]	0.000177484	20.0907	64930.1	3183975	2 (2 0 0 0 0)
DLG1_HUMAN Disks large homolog 1 (Synapse-associated protein 97) (SAP-97) (hDl	0.00530389	20.0865	100293	2497504	2 (2 0 0 0 0)
hypothetical protein [Homo sapiens]	0.000832574	20.0862	174936	50949447	3 (1 1 0 0 1)
UFHUM fumarate hydratase (EC 4.2.1.2) precursor, mitochondrial - human (fragment)	0.00886797	20.0822	50352.8	68293	2 (2 0 0 0 0)
KIAA0570 protein [Homo sapiens]	0.00953978	20.0803	388908	20521085	2 (2 0 0 0 0)
ataxin 2 related protein isoform A [Homo sapiens]	0.00196212	20.0793	113304	27262647	4 (0 2 0 0 2)
solute carrier family 8 (sodium/calcium exchanger), member 1 [Homo sap	5.67867e-05	20.0788	108478	10863913	2 (2 0 0 0 0)
KIAA0338 [Homo sapiens]	9.6103e-06	20.0694	103516	2224617	2 (2 0 0 0 0)
KIAA1680 protein [Homo sapiens]	0.00872005	20.069	99692.8	12697905	4 (0 1 0 3 0)
PREP_HUMAN Presequence protease, mitochondrial precursor (hPreP) (Pitrilysin	0.00136197	20.0684	117380	115311843	2 (2 0 0 0 0)
cullin 3 [Homo sapiens]	0.00932326	20.0668	88873.5	4503165	5 (1 0 2 2 0)
AF287356_1 centrosome-associated protein 350 [Homo sapiens]	0.00789123	20.0643	350720	18027302	6 (0 2 0 4 0)
psoriasis vulgaris immunoglobulin heavy chain [Homo sapiens]	0.00445808	20.0617	13351.5	13991524	2 (2 0 0 0 0)
75 kDa subunit NADH dehydrogenase precursor [Homo sapiens]	4.44073e-09	18.2139	79522.6	38079	3 (2 1 0 0 0)
ATP synthase, H+ transporting, mitochondrial F1 complex, beta subunit	1.51346e-05	18.1901	56524.7	32189394	5 (4 1 0 0 0)
A55877 tumor necrosis factor type 1 receptor associated protein TRAP-1 - human	1.062e-05	18.1671	75295	1082886	3 (0 2 0 0 1)
A Chain A, Crystal Structure Of Caenorhabditis Elegans Mg-Atp Actin Complexed	3.54513e-08	18.1593	41637.7	14278147	3 (1 2 0 0 0)
collapsin response mediator protein 1 isoform 2 [Homo sapiens]	3.58335e-05	18.1581	62144.8	4503051	4 (2 2 0 0 0)
immunoglobulin superfamily, member 8 [Homo sapiens]	4.43828e-06	18.1281	64993.6	16445029	3 (1 0 0 2 0)
Kinesin-like protein KIFC3 variant [Homo sapiens]	0.00600543	18.1053	96422.6	62088160	2 (1 1 0 0 0)
E1B 55K [Human adenovirus 52]	0.0006165	18.0978	52434.8	117503038	3 (1 0 0 2 0)
hCG1641913, isoform CRA_b [Homo sapiens]	0.00746329	18.0978	65476.7	119628438	2 (1 1 0 0 0)
truncated pol protein [Human immunodeficiency virus type 1]	0.0016472	18.0853	23434	13604904	2 (1 1 0 0 0)
hypothetical protein [Homo sapiens]	0.000214889	18.0848	110722	52545742	3 (1 1 0 0 1)
A30802 Ca2+-transporting ATPase (EC 3.6.3.8) 2, plasma membrane - human	0.000462327	18.081	134625	86988	3 (1 1 0 0 1)
apoptotic peptidase activating factor 1 isoform c [Homo sapiens]	0.00841803	18.0746	141749	32483359	3 (1 0 1 0 1)
RIPK3_HUMAN Receptor-interacting serine/threonine-protein kinase 3 (RIP-like	0.00113959	18.0727	56865.3	20455241	2 (1 1 0 0 0)
p53-associated parkin-like cytoplasmic protein [Homo sapiens]	0.0059422	18.0694	281047	24307991	2 (1 1 0 0 0)
adaptor-related protein complex 3, beta 2 subunit [Homo sapiens]	0.00410413	18.068	118985	34482047	4 (1 0 0 1 2)
polyprotein [Human immunodeficiency virus 1]	0.00530794	18.0667	67225.5	88853194	2 (1 1 0 0 0)
BPA1_HUMAN Bullous pemphigoid antigen 1, isoforms 1/2/3/4/5/8 (230 kDa bullou	0.00942061	18.0633	371977	27923959	2 (1 1 0 0 0)
intersectin 1 [Danio rerio]	0.000572406	18.0609	193993	46395470	2 (1 1 0 0 0)
MLH3_HUMAN DNA mismatch repair protein Mlh3 (MutL protein homolog 3)	0.0025882	18.0552	163608	13878584	2 (1 1 0 0 0)
coagulation factor V jinjiang B domain [Homo sapiens]	0.00432394	18.055	104525	17426607	2 (1 1 0 0 0)
dynamin 2 isoform 1 [Homo sapiens]	0.00179347	18.0495	98003.3	56549121	3 (1 0 0 2 0)
unnamed protein product [Homo sapiens]	1.06106e-07	16.1844	40975.2	34532426	3 (2 0 1 0 0)
DPYL4_HUMAN Dihydropyrimidinase-related protein 4 (DRP-4) (Collapsin response	3.58335e-05	16.1749	61838.5	68067941	5 (2 1 0 1 1)
septin 3 isoform A [Homo sapiens]	3.3192e-09	16.1733	39320.4	22035572	2 (1 0 1 0 0)
TBB4Q_HUMAN Tubulin beta-4q chain	0.00832825	16.1574	48403.5	12643363	2 (0 2 0 0 0)
ubiquitin and ribosomal protein L40 precursor [Homo sapiens]	4.3691e-06	16.1399	14719	4507761	2 (1 0 1 0 0)
ORF1a [Human coronavirus 229E]	0.000955002	16.1231	453915	59491	3 (1 0 0 1 1)
NDP52 [Homo sapiens]	0.00688343	16.121	52192.7	48145643	2 (1 0 1 0 0)
chaperonin containing TCP1, subunit 5 (epsilon) [Homo sapiens]	3.01585e-05	16.1172	59632.9	24307939	2 (1 0 1 0 0)
integrin alpha M precursor [Homo sapiens]	0.000576447	16.1097	127099	88501734	2 (1 0 1 0 0)
L1 cell adhesion molecule isoform 1 precursor [Homo sapiens]	0.000453304	16.1069	139915	4557707	2 (1 0 1 0 0)
interleukin 29 [Homo sapiens]	0.0093026	16.1051	21884.7	26024325	4 (1 0 0 2 1)
CCG1 protein [Homo sapiens]	0.00440383	16.1023	178663	29733	2 (1 0 1 0 0)
human MLK (Mixed Lineage Kinase) homolog family member (mlk-1) [Caenor	0.00492202	16.0925	115401	25149255	2 (0 2 0 0 0)
unnamed protein product [Homo sapiens]	0.00195447	16.0868	32431.6	28207923	2 (1 0 1 0 0)
hypothetical protein [Homo sapiens]	0.00368754	16.0862	112196	13276699	2 (1 0 1 0 0)
heat shock 70kDa protein 2 [Homo sapiens]	0.00573949	16.0859	69978	13676857	3 (1 0 0 1 1)
S63994 protein disulfide-isomerase (EC 5.3.4.1) ER60 precursor - human	0.00753065	16.0799	56715.8	2135267	2 (1 0 1 0 0)
fibrinogen, alpha polypeptide isoform alpha-E preproprotein [Homo sapie	0.00146737	16.0797	94914.3	4503689	2 (1 0 1 0 0)
solute carrier family 26, member 6, isoform CRA_k [Homo sapiens]	0.00588227	16.0713	33463.6	119585314	2 (1 0 1 0 0)
KIAA1670 protein [Homo sapiens]	0.00433679	16.0702	68221	13359213	2 (0 2 0 0 0)
SMG5_HUMAN Protein SMG5 (SMG-5 homolog) (EST1-like protein B) (LPTS-interacti	0.00456018	16.0648	113855	84029494	3 (0 1 1 0 1)
biotinidase precursor [Homo sapiens]	0.00256542	16.0648	61093.3	4557373	2 (1 0 1 0 0)
A Chain A, Biochemical Characterization And Structure Determination Of Human He	0.00315083	16.0637	31805.1	5107725	2 (1 0 1 0 0)
apolipoprotein E precursor [Homo sapiens]	0.00279621	16.0566	36131.8	4557325	2 (1 0 1 0 0)
CMYA3 [Homo sapiens]	0.00163493	16.043	378997	56407236	2 (1 0 1 0 0)
similar to Chain , Heat-Shock Cognate 70kd Protein (44kd Atpase N-Termi	1.07187e-06	14.167	25582.3	51095055	2 (1 0 0 1 0)
H2A histone family, member A [Homo sapiens]	2.06222e-06	14.1647	14127	10645195	4 (3 0 0 1 0)
ras related v-ral simian leukemia viral oncogene homolog A [Homo sapie	6.43431e-09	14.1466	23552	33946329	2 (1 0 0 1 0)
DnaJ (Hsp40) homolog, subfamily C, member 5 [Homo sapiens]	0.000414064	14.1313	22134.3	45504382	2 (1 0 0 1 0)
KIAA1110 protein [Homo sapiens]	0.00897885	14.1018	80060.4	5689557	2 (1 0 0 1 0)
cysteine and histidine-rich domain (CHORD)-containing, zinc binding pro	0.00199992	14.1011	37412.7	6912304	2 (0 1 1 0 0)
unnamed protein product [Homo sapiens]	0.00081523	14.0928	37237.2	16552323	3 (0 1 2 0 0)
polyprotein [Human enterovirus 94]	0.000269023	14.0924	243612	119220354	3 (0 1 1 1 0)
UBX domain containing 1 [Homo sapiens]	0.00184536	14.0875	49723	13376854	3 (0 1 1 0 1)
hCG1643751, isoform CRA_b [Homo sapiens]	0.00885943	14.0818	57940.2	119606337	2 (0 1 1 0 0)
zona pellucida glycoprotein 2 preproprotein [Homo sapiens]	0.00175695	14.0786	82303.6	4508045	4 (1 1 2 0 0)
env protein [Human immunodeficiency virus 1]	0.0075375	14.0758	97702.5	37682758	2 (0 1 1 0 0)
fatty acid binding protein 3 [Homo sapiens]	0.000631486	14.0755	14848.7	4758328	4 (1 1 1 1 0)
Ts translation elongation factor, mitochondrial [Homo sapiens]	0.000916181	14.0748	37632.4	21361280	2 (0 1 1 0 0)
hCG1746478 [Homo sapiens]	0.00298931	14.0723	8765.43	119597464	3 (1 0 1 1 0)
RP3A_HUMAN Rabphilin-3A (Exophilin-1)	0.00653295	14.0717	76824.3	13878745	3 (1 0 0 0 2)
ADA28_HUMAN ADAM 28 precursor (A disintegrin and metalloproteinase domain 28)	0.00353282	14.0713	87151.1	14423638	2 (0 1 1 0 0)
unnamed protein product [Homo sapiens]	0.00316178	14.0676	25215.2	28193116	2 (1 0 0 1 0)
immunoglobulin kappa light chain variable region [Homo sapiens]	0.005665	14.0661	12236	62720472	2 (1 0 0 1 0)
Ac-like transposable element [Homo sapiens]	0.0095255	14.066	78105.7	4759258	3 (0 1 0 1 1)
KIAA0566 protein [Homo sapiens]	0.00308942	14.0615	129279	3043656	2 (1 0 0 1 0)
coatomer protein complex, subunit alpha, putative [Arabidopsis thalian	0.00436605	14.061	136480	15220684	3 (0 0 1 2 0)
p24 protein [Human immunodeficiency virus 1]	0.00017025	14.0609	23735.1	27848391	2 (1 0 0 1 0)
PRP8 protein [Homo sapiens]	0.00283143	14.0525	273609	2463577	3 (0 1 0 1 1)
SNAP-associated protein [Homo sapiens]	0.00537332	14.0522	14864.9	6912674	2 (1 0 0 1 0)
focal adhesion kinase [Homo sapiens]	0.00795968	14.0492	115741	1082034	2 (0 1 1 0 0)
cleft lip and palate associated transmembrane protein 1 [Homo sapiens]	0.001949	14.0425	76048.6	4502897	2 (0 1 1 0 0)
delta globin [Homo sapiens]	1.76629e-07	12.1779	16045.3	4504351	2 (1 0 0 0 1)
T46481 hypothetical protein DKFZp434A025.1 - human (fragment)	0.00406102	12.1466	117578	11359883	5 (0 2 0 1 2)
apolipoprotein O [Homo sapiens]	6.92173e-08	12.1307	22270.5	13129148	2 (1 0 0 0 1)
calmodulin-like 3 [Homo sapiens]	0.00181294	12.1304	16880	4885111	4 (2 1 0 1 0)
EPB41L3 protein [Homo sapiens]	1.64419e-05	12.1273	96454.3	13544009	2 (1 0 0 0 1)
Na+/K+ -ATPase beta 2 subunit [Homo sapiens]	4.44392e-09	12.1235	33345.4	49574491	2 (1 0 0 0 1)
adenylate cyclase 9 [Homo sapiens]	0.00822916	12.0998	150604	50959205	3 (0 0 1 1 1)
IFNK_HUMAN Interferon kappa precursor (IFN-kappa)	0.00978245	12.0996	25202.7	60390156	2 (0 1 0 1 0)
Chromosome 11 open reading frame 47 [Homo sapiens]	0.00243315	12.0984	68573.6	84627448	2 (1 0 0 0 1)
ENTH domain containing 1 [Homo sapiens]	0.00252043	12.0966	67496	31377575	2 (0 1 0 1 0)
RGS14_HUMAN Regulator of G-protein signaling 14 (RGS14)	0.000231318	12.092	64560.8	19855059	2 (1 0 0 0 1)
envelope glycoprotein [Human immunodeficiency virus 1]	0.00249218	12.0915	21023.6	119220988	2 (0 1 0 1 0)
polymerase [Human rhinovirus 70]	0.00190721	12.0885	18465.7	38146842	2 (1 0 0 0 1)
aldehyde dehydrogenase 5A1 precursor, isoform 2 [Homo sapiens]	7.81831e-05	12.0885	57178.4	4507229	2 (1 0 0 0 1)
hypothetical protein LOC102871 [Mus musculus]	0.00503314	12.0881	96786	30425010	2 (1 0 0 0 1)
polyprotein [Human rhinovirus 92]	0.000729007	12.0861	52019	39655223	3 (0 1 1 1 0)
ODP2_HUMAN Dihydrolipoyllysine-residue acetyltransferase component of pyruvate	0.000777095	12.0848	65739.4	3915777	2 (1 0 0 0 1)
actin-related protein 2 isoform b [Homo sapiens]	0.00210094	12.0848	44732.3	5031571	4 (0 1 1 0 2)
VE1_HPV30 Replication protein E1 (ATP-dependent helicase E1)	0.00485592	12.0845	71763	549225	2 (1 0 0 0 1)
DNJC7_HUMAN DnaJ homolog subfamily C member 7 (Tetratricopeptide repeat prote	0.00744266	12.0839	56404.7	46397879	2 (0 1 0 1 0)
AF349909_4 putative regulatory protein E2 [Human papillomavirus type 86]	0.00325352	12.0826	42330.1	15741131	2 (1 0 0 0 1)
KIAA0376 [Homo sapiens]	0.00130188	12.0824	99802.8	2280485	3 (0 2 0 1 0)
gag protein [Human immunodeficiency virus 1]	0.00145866	12.0803	55073.1	55735950	2 (0 1 0 1 0)
unnamed protein product [Homo sapiens]	0.00202038	12.0802	134578	14042852	2 (1 0 0 0 1)
envelope glycoprotein [Human immunodeficiency virus 1]	0.00823899	12.0797	95077.9	55740261	2 (1 0 0 0 1)
optic atrophy 1 homolog [Mus musculus]	0.00498834	12.0742	111270	19526960	2 (0 0 2 0 0)
unnamed protein product [Homo sapiens]	0.00481177	12.071	168863	809019	2 (0 1 0 1 0)
VP3 [Human rotavirus A]	8.56065e-05	12.0703	98156.9	33520132	2 (0 1 0 1 0)
gag protein [Human immunodeficiency virus 1]	0.00705837	12.068	54823.9	55416337	3 (0 0 3 0 0)
kinetochore associated 2 [Homo sapiens]	0.00824886	12.067	73866.6	5174457	3 (0 0 1 1 1)
PK3CD_HUMAN Phosphatidylinositol-4,5-bisphosphate 3-kinase catalytic subunit	0.00312798	12.0654	119402	67477424	3 (0 0 1 1 1)
immunoglobulin heavy chain variable region [Homo sapiens]	0.00984691	12.0651	12264	70797967	2 (0 1 0 1 0)
succinate dehydrogenase complex, subunit B, iron sulfur (Ip) [Homo sa	0.00329209	12.0642	31608.8	115387094	2 (1 0 0 0 1)
decay-accelerating factor 4ab [Homo sapiens]	0.00289257	12.0624	44768.5	19347603	3 (1 1 0 1 0)
hSSH-3 [Homo sapiens]	0.00985951	12.0623	52708.7	22830837	2 (0 1 0 1 0)
ACBD4 protein [Homo sapiens]	0.00865189	12.0596	37761.4	26996542	2 (0 1 0 1 0)
KIAA1618 protein [Homo sapiens]	0.00556597	12.0596	160171	10047313	3 (0 0 1 1 1)
U74 [Human herpesvirus 6B]	0.00161188	12.0573	76515.4	4996062	2 (0 0 2 0 0)
transmembrane protein	0.00233467	12.0559	40858.4	755466	2 (1 0 0 0 1)
KIAA0556 protein [Homo sapiens]	0.0045518	12.0556	181522	14133207	2 (0 1 0 1 0)
human immunodeficiency virus type I enhancer binding protein 2 [Rattus	0.00460283	12.0531	267257	13162314	2 (0 1 0 1 0)
envelope glycoprotein [Human immunodeficiency virus 1]	0.000598317	12.0514	14940.8	46948883	5 (1 2 0 2 0)
N-methyl-D-aspartate receptor subunit 2D precursor [Homo sapiens]	0.00501688	12.0367	143469	4504131	2 (0 1 0 1 0)
histone H2A [Homo sapiens]	2.91977e-08	10.284	13986.8	28195394	5 (5 0 0 0 0)
H2A histone family, member O [Homo sapiens]	3.70746e-07	10.2642	14086.9	4504251	3 (3 0 0 0 0)
synaptosomal-associated protein, 25kDa [Homo sapiens]	8.90668e-09	10.2631	10676	24740601	2 (2 0 0 0 0)
dendritic cell nectin-like protein 1 short isoform [Homo sapiens]	8.67211e-08	10.2286	25639	25777796	2 (2 0 0 0 0)
tubulin, alpha 1a [Mus musculus]	3.40689e-08	10.2144	49927.7	6678465	1 (1 0 0 0 0)
DHSA_HUMAN Succinate dehydrogenase [ubiquinone] flavoprotein subunit, mitochon	4.56251e-08	10.2127	72645.4	1169337	1 (1 0 0 0 0)
S31503 H+/K+-exchanging ATPase (EC 3.6.3.10) ATP1AL1 - human (fragment)	2.33972e-07	10.1883	10485.2	346261	5 (3 2 0 0 0)
myotrophin [Homo sapiens]	3.9661e-06	10.1861	12886.6	21956645	1 (1 0 0 0 0)
GDAP1_HUMAN Ganglioside-induced differentiation-associated protein 1 (GDAP1)	6.9618e-06	10.1847	41225.8	38257679	1 (1 0 0 0 0)
E57233 complexin II - human	6.06752e-07	10.181	15338.7	1362772	1 (1 0 0 0 0)
PTPRZ_HUMAN Receptor-type tyrosine-protein phosphatase zeta precursor (R-PTP-ze	2.04184e-07	10.1783	254370	400199	1 (1 0 0 0 0)
A Chain A, Kinetic Analysis Of Product Inhibition In Human Manganese Superoxid	1.98153e-06	10.169	22075.2	14488599	2 (2 0 0 0 0)
ODO2_HUMAN Dihydrolipoyllysine-residue succinyltransferase component of 2-oxog	0.000184159	10.1689	48609.5	1709442	1 (1 0 0 0 0)
N-ethylmaleimide-sensitive factor [Homo sapiens]	5.14303e-06	10.1646	82602.2	11079228	1 (1 0 0 0 0)
adducin 1 (alpha) isoform a [Homo sapiens]	5.65239e-05	10.1638	80904.8	29826319	1 (1 0 0 0 0)
41kD protein kinase [Homo sapiens]	1.94769e-08	10.1618	41335.2	23881	1 (1 0 0 0 0)
unnamed protein product [Homo sapiens]	0.0063042	10.1577	30614	22760872	2 (1 0 1 0 0)
FLJ00118 protein [Homo sapiens]	2.85563e-07	10.1552	13688	10440536	1 (1 0 0 0 0)
mitochondrial glutamate carrier 1 [Homo sapiens]	0.00101506	10.1528	34448.3	13375983	1 (1 0 0 0 0)
A Chain A, Human Prion Protein	1.38676e-07	10.152	22876.6	6730485	1 (1 0 0 0 0)
isocitrate dehydrogenase (NADP+) [Homo sapiens]	2.44895e-06	10.1514	50915.9	872121	1 (1 0 0 0 0)
syntaxin 1B2 [Rattus norvegicus]	8.39109e-06	10.1486	33223.8	6981600	2 (2 0 0 0 0)
tyrosine 3-monooxygenase/tryptophan 5-monooxygenase activation protein,	2.9164e-06	10.1485	28284.9	9507245	3 (3 0 0 0 0)
lanthionine synthetase C-like protein 1 [Homo sapiens]	7.31428e-07	10.1478	45253.6	5174445	1 (1 0 0 0 0)
F45213 Ca2+-transporting ATPase (EC 3.6.3.8), plasma membrane isoform 2a - rat (frag	6.76462e-08	10.1475	12855.7	420242	1 (1 0 0 0 0)
NDUV2_HUMAN NADH dehydrogenase [ubiquinone] flavoprotein 2, mitochondrial pre	2.66847e-05	10.1462	27374	20455499	1 (1 0 0 0 0)
motor protein [Homo sapiens]	0.00529299	10.1449	18247.2	516766	1 (1 0 0 0 0)
A Chain A, Crystal Structure Of Human Cd81 Extracellular Domain, A Receptor Fo	4.01041e-06	10.1445	9898.87	13399775	1 (1 0 0 0 0)
envelope glycoprotein [Human immunodeficiency virus 1]	0.00137973	10.144	24181.2	62904073	1 (1 0 0 0 0)
FXYD domain-containing ion transport regulator 6 [Homo sapiens]	1.0561e-06	10.1437	10535.4	11612655	1 (1 0 0 0 0)
thioesterase superfamily member 2 [Homo sapiens]	1.23526e-09	10.1432	14950.9	8923812	1 (1 0 0 0 0)
vif [Human immunodeficiency virus 1]	0.000609138	10.1417	22637.8	3287159	1 (1 0 0 0 0)
DCTN2_HUMAN Dynactin subunit 2 (Dynactin complex 50 kDa subunit) (50 kDa dyne	0.000103857	10.1388	44203.9	22096346	2 (2 0 0 0 0)
microsomal glutathione S-transferase 3 [Homo sapiens]	5.79254e-05	10.1373	16505.6	4758714	3 (3 0 0 0 0)
RAB3A, member RAS oncogene family [Homo sapiens]	3.94563e-05	10.136	24968.1	4506367	1 (1 0 0 0 0)
ADP-ribosylation factor 3 [Homo sapiens]	6.87849e-05	10.1354	20587.7	4502203	1 (1 0 0 0 0)
CD99 antigen-like 2 isoform E3'-E4'-E3-E4 [Homo sapiens]	0.000841141	10.1344	27968.8	71067336	1 (1 0 0 0 0)
hypothetical protein [Homo sapiens]	4.27388e-06	10.1334	18150.4	21740133	1 (1 0 0 0 0)
beta II spectrin [Homo sapiens]	1.48012e-06	10.1309	9520.6	3097076	1 (1 0 0 0 0)
hCG201417 [Homo sapiens]	0.00545921	10.1298	23658.7	119594542	2 (1 0 0 0 1)
hCG2042085 [Homo sapiens]	0.00107585	10.128	11491.6	119618807	2 (1 0 1 0 0)
peroxiredoxin 2 isoform a [Homo sapiens]	7.0416e-07	10.1263	21878.2	32189392	1 (1 0 0 0 0)
zinc finger, CDGSH-type domain 1 [Homo sapiens]	2.53565e-07	10.126	12191.2	8923930	1 (1 0 0 0 0)
PAX6 [Homo sapiens]	0.00720472	10.1257	8015.15	81022828	1 (1 0 0 0 0)
beta actin [Homo sapiens]	1.47275e-05	10.1255	41709.7	4501885	2 (2 0 0 0 0)
RAB1B, member RAS oncogene family [Homo sapiens]	6.2667e-05	10.1235	22157.2	13569962	1 (1 0 0 0 0)
glycoprotein M6B isoform 1 [Homo sapiens]	9.81986e-07	10.1219	36195.7	50263048	1 (1 0 0 0 0)
immunoglobulin light chain variable region [Homo sapiens]	0.00171258	10.1217	12651.2	3328008	1 (1 0 0 0 0)
envelope glycoprotein [Human immunodeficiency virus type 1]	0.000835642	10.1217	11814.2	3892307	1 (1 0 0 0 0)
phosphoglycerate mutase 1 (brain) [Homo sapiens]	0.000181268	10.1217	28785.8	4505753	1 (1 0 0 0 0)
flotillin 1 [Homo sapiens]	2.68305e-05	10.1215	47325.7	5031699	1 (1 0 0 0 0)
S22902 Ig kappa chain V region - human	0.00519849	10.1215	15568.7	106540	1 (1 0 0 0 0)
Cytochrome c oxidase subunit Va [Homo sapiens]	0.00132901	10.1212	16751.7	18999392	2 (2 0 0 0 0)
cytosolic malate dehydrogenase [Homo sapiens]	2.98248e-08	10.1207	36403	5174539	1 (1 0 0 0 0)
actinin, alpha 2 [Homo sapiens]	0.000541745	10.1206	103788	4501893	1 (1 0 0 0 0)
serine/threonine protein kinase US3 [Human herpesvirus 1]	0.00405897	10.1198	52801.4	9629444	2 (2 0 0 0 0)
solute carrier family 25 member 3 isoform b precursor [Homo sapiens]	7.98157e-05	10.1197	39932.7	4505775	1 (1 0 0 0 0)
GC-rich sequence DNA-binding factor candidate isoform 1 [Homo sapiens]	0.00960307	10.1196	104739	22035565	1 (1 0 0 0 0)
ADT3_HUMAN ADP/ATP translocase 3 (Adenine nucleotide translocator 2) (ANT 3) (A	8.62755e-07	10.1168	32845.2	113463	1 (1 0 0 0 0)
hypothetical protein DDBDRAFT_0167227 [Dictyostelium discoideum AX4]	0.00379292	10.1132	18299	66819753	1 (1 0 0 0 0)
neurofilament-66; NF-66 [Homo sapiens]	0.00488319	10.1122	54875.2	994844	1 (1 0 0 0 0)
zinc finger protein 524 [Homo sapiens]	0.00873991	10.111	28691.5	23397479	1 (1 0 0 0 0)
HSP70-HOM [Homo sapiens]	0.00037055	10.1107	70361.4	4529894	2 (2 0 0 0 0)
tyrosine 3/tryptophan 5 -monooxygenase activation protein, theta polype	0.000376581	10.1102	27746.8	5803227	1 (1 0 0 0 0)
oligodendrocyte myelin glycoprotein [Homo sapiens]	0.000286255	10.1101	49576.3	52426787	1 (1 0 0 0 0)
KIAA1307 protein [Homo sapiens]	0.000891712	10.1096	186072	7242969	1 (1 0 0 0 0)
unnamed protein product [Homo sapiens]	0.00187538	10.1092	28746.5	10440131	1 (1 0 0 0 0)
KIAA0735 protein [Homo sapiens]	7.20639e-05	10.1089	80056.4	40788342	1 (1 0 0 0 0)
coiled-coil-helix-coiled-coil-helix domain containing 3 [Homo sapiens]	0.0010843	10.1086	26136.2	8923390	1 (1 0 0 0 0)
synapsin II, isoform CRA_b [Homo sapiens]	6.96213e-05	10.1078	53037.8	119584522	1 (1 0 0 0 0)
pyruvate dehydrogenase (lipoamide) beta [Homo sapiens]	0.00175484	10.1073	39224.1	4505687	1 (1 0 0 0 0)
A Chain A, Structure Of The Human PinLC8 DIMER WITH A BOUND PEPTIDE	0.000311993	10.1073	9853.93	7245516	1 (1 0 0 0 0)
F-box only protein 2 [Homo sapiens]	6.56553e-06	10.1067	33306.8	15812198	1 (1 0 0 0 0)
tubulin, alpha 4 [Mus musculus]	0.000717494	10.1064	49892.4	6678467	1 (1 0 0 0 0)
pol protein [Human immunodeficiency virus 1]	0.0035058	10.106	57145.5	42717546	1 (1 0 0 0 0)
similar to XM_028438 CGI-101 protein in Homo sapiens [Schistosoma japoni	0.00612188	10.1059	27459	29840977	3 (3 0 0 0 0)
cell division cycle associated 5 [Homo sapiens]	0.00469517	10.1057	27583.5	18087845	1 (1 0 0 0 0)
envelope glycoprotein [Human immunodeficiency virus 1]	8.36071e-05	10.1057	97850.8	146150943	1 (1 0 0 0 0)
leucine-rich repeat-containing G protein-coupled receptor 6 isoform	0.00456559	10.1025	89245	62912474	1 (1 0 0 0 0)
ATP synthase, H+ transporting, mitochondrial F1 complex, gamma subu	0.00216766	10.1018	32975.3	50345988	1 (1 0 0 0 0)
unnamed protein product [Homo sapiens]	0.00213555	10.1018	14736.4	10435535	2 (1 0 1 0 0)
leucine rich repeat containing 57, isoform CRA_b [Homo sapiens]	0.00040061	10.1014	17485.4	119612967	1 (1 0 0 0 0)
tetraspanin 7 [Homo sapiens]	0.000538958	10.1008	27555.7	21265104	1 (1 0 0 0 0)
single-stranded DNA binding protein 1 [Homo sapiens]	0.000137049	10.1004	17249	4507231	1 (1 0 0 0 0)
solute carrier family 9 (sodium/hydrogen exchanger), isoform 3 [Homo sa	0.00788833	10.0995	92849	6806921	1 (1 0 0 0 0)
Y190_ADE07 Hypothetical 19.0 kDa early protein	0.00271483	10.0965	18998.7	139989	1 (1 0 0 0 0)
unnamed protein product [Mus musculus]	0.00762775	10.0956	25698.3	12832572	2 (0 1 0 0 1)
KIAA1363 protein [Homo sapiens]	0.00443951	10.0942	48042	7243107	1 (1 0 0 0 0)
immunoglobulin heavy chain variable region [Homo sapiens]	0.00711228	10.0938	16294.9	39938295	1 (1 0 0 0 0)
nef protein [Human immunodeficiency virus 1]	0.000578066	10.0933	23510.5	31087630	1 (1 0 0 0 0)
hCG1643030, isoform CRA_b [Homo sapiens]	0.00211357	10.0915	24381.7	119616353	1 (1 0 0 0 0)
vpr protein [Human immunodeficiency virus 1]	0.000312285	10.09	11522.9	16118321	1 (1 0 0 0 0)
legumain preproprotein [Homo sapiens]	9.25489e-05	10.0892	49379.5	56682962	1 (1 0 0 0 0)
AF329266_1 CUG-BP and ETR-3 like factor 5 [Homo sapiens]	0.00798437	10.0877	51853.5	12746396	1 (1 0 0 0 0)
neurotrimin isoform 1 [Homo sapiens]	0.00103111	10.0876	37947.5	7705413	1 (1 0 0 0 0)
Golgi autoantigen, golgin subfamily a, 3 [Homo sapiens]	0.00276148	10.0864	167252	30089940	2 (0 1 0 0 1)
ADP-ribosylation factor GTPase activating protein 1 isoform a variant [	0.00220768	10.0859	44641.2	62898415	2 (1 0 0 1 0)
envelope glycoprotein [Human immunodeficiency virus 1]	0.00378754	10.0859	96593.7	90993623	1 (1 0 0 0 0)
hCG2007412 [Homo sapiens]	0.000426647	10.0858	15498.5	119630098	1 (1 0 0 0 0)
ATP synthase, H+ transporting, mitochondrial F1 complex, delta subunit	0.00962594	10.0855	17479.2	4502297	1 (1 0 0 0 0)
A Chain A, Crystal Structure Of Dictyostelium Discoideum Actin Complexed With	0.00156679	10.0849	41574.7	28374049	1 (1 0 0 0 0)
immunoglobulin heavy chain variable region [Homo sapiens]	0.00793228	10.0844	13745.9	39939741	1 (1 0 0 0 0)
glycerol-3-phosphate dehydrogenase 2 (mitochondrial) [Homo sapiens	0.00395183	10.0837	80782.6	133908614	1 (1 0 0 0 0)
envelope glycoprotein [Human immunodeficiency virus type 1]	0.000534822	10.0829	10689.6	5732873	1 (1 0 0 0 0)
wingless-type MMTV integration site family, member 4 precursor [Homo s	0.000996339	10.0823	39026.2	17402922	1 (1 0 0 0 0)
envelope glycoprotein [Human immunodeficiency virus 1]	0.00679749	10.0817	22717.2	31872837	1 (1 0 0 0 0)
immunoglobulin heavy chain variable region [Homo sapiens]	0.00305902	10.0811	9636.56	9663202	1 (1 0 0 0 0)
GTR9_HUMAN Solute carrier family 2, facilitated glucose transporter member 9	0.00780286	10.0806	58779.5	17366994	1 (1 0 0 0 0)
vpr protein [Human immunodeficiency virus 1]	0.00412923	10.0789	11267.9	110559532	1 (1 0 0 0 0)
unnamed protein product [Homo sapiens]	0.00602315	10.0785	42260.9	16554194	3 (0 0 1 0 2)
unnamed protein product [Homo sapiens]	0.000677058	10.0784	15622.9	34530929	1 (1 0 0 0 0)
metallothionein 3 [Homo sapiens]	0.000909995	10.0783	6921.49	5174762	1 (1 0 0 0 0)
envelope glycoprotein [Human immunodeficiency virus 1]	0.00211413	10.0779	37381.5	73763997	1 (1 0 0 0 0)
immunoglobulin heavy chain variable region [Homo sapiens]	0.00410294	10.0771	15662.5	3170799	1 (1 0 0 0 0)
farnesyl-diphosphate farnesyltransferase 1 [Homo sapiens]	0.00285434	10.077	48084.3	67089147	1 (1 0 0 0 0)
KIAA1802 protein [Homo sapiens]	0.00413746	10.076	90082.5	14017821	2 (0 0 1 1 0)
protease [Human immunodeficiency virus type 1]	0.00344836	10.0758	10992.1	15192415	1 (1 0 0 0 0)
hCG1807339 [Homo sapiens]	0.00850732	10.0757	7986.03	119610307	1 (1 0 0 0 0)
gag protein [Human immunodeficiency virus 1]	0.00368758	10.0756	14759.3	55979865	1 (1 0 0 0 0)
ubiquitin carboxyl-terminal esterase L1 (ubiquitin thiolesterase) [Hom	0.000161603	10.075	24808.5	21361091	1 (1 0 0 0 0)
non-productive immunoglobulin heavy chain CDR3 [Homo sapiens]	0.00022641	10.0746	12725	46811688	1 (1 0 0 0 0)
nef protein [Human immunodeficiency virus 1]	0.008085	10.0745	23860.6	109894078	1 (1 0 0 0 0)
coiled-coil domain containing 127 [Homo sapiens]	0.00751463	10.0741	30815	21687127	1 (1 0 0 0 0)
immunoglobulin heavy chain variable region [Homo sapiens]	0.000644292	10.0732	11100.5	112697191	1 (1 0 0 0 0)
immunoglobulin heavy chain variable region [Homo sapiens]	0.00723221	10.0732	13865.6	70798524	1 (1 0 0 0 0)
major capsid protein [Human papillomavirus]	0.00393058	10.0727	16133.2	28864489	1 (1 0 0 0 0)
unnamed protein product [Homo sapiens]	0.00152102	10.0727	39328.5	21751360	2 (0 0 1 1 0)
crystallin, alpha B [Homo sapiens]	2.79868e-06	10.0719	20146.4	4503057	1 (1 0 0 0 0)
envelope glycoprotein gp120 [Human immunodeficiency virus 1]	0.000962812	10.0719	24196.9	85663149	1 (1 0 0 0 0)
zinc finger protein ZNF210 [Homo sapiens]	0.00896883	10.0715	55277.1	3818515	1 (1 0 0 0 0)
gp160 [Human immunodeficiency virus 1]	0.0098502	10.0715	82937.7	7413996	1 (1 0 0 0 0)
Chain , Calponin Homology (Ch) Domain From Human Beta-Spectrin	0.00142677	10.0708	12559.3	2914153	1 (1 0 0 0 0)
hCG2014623 [Homo sapiens]	0.00314942	10.0708	8493.44	119617100	1 (1 0 0 0 0)
serotonin 4 receptor (5-HT4) [Homo sapiens]	0.00250364	10.0706	16629.3	984127	1 (1 0 0 0 0)
ATPase, H+ transporting, lysosomal V0 subunit a4 [Homo sapiens]	0.00991245	10.0702	96323.2	85386053	1 (1 0 0 0 0)
zinc finger protein 326 isoform 1 [Homo sapiens]	0.00555487	10.0697	65613.1	33946297	3 (0 1 1 0 1)
anti-tetanus toxoid immunoglobulin heavy chain variable region [Homo sap	0.00013725	10.069	13828.8	58222131	1 (1 0 0 0 0)
gastrin-releasing peptide isoform 1 preproprotein [Homo sapiens]	0.00577388	10.0688	16203.5	31542860	1 (1 0 0 0 0)
AF151855_1 CGI-97 protein [Homo sapiens]	0.00758013	10.068	28770.4	4929663	1 (1 0 0 0 0)
Hlark [Homo sapiens]	0.00524603	10.0679	40913.6	2078529	1 (1 0 0 0 0)
similar to t-complex 1; T-complex locus TCP-1; t-complex 1 (a murine tcp	0.00706505	10.0674	19812.7	51094756	5 (2 0 1 1 1)
cytochrome c oxidase subunit VIIa polypeptide 2 (liver) precursor [Homo	0.00860726	10.0673	9390.1	4502989	1 (1 0 0 0 0)
Hypothetical protein LOC138724 [Homo sapiens]	0.000317591	10.0653	116082	28279005	1 (1 0 0 0 0)
vif protein [Human immunodeficiency virus 1]	0.00752532	10.0631	22817.9	63098354	1 (1 0 0 0 0)
VTI1A_HUMAN Vesicle transport through interaction with t-SNAREs homolog 1A (V	0.00745491	10.0627	23420.8	29337113	2 (0 0 1 1 0)
Unknown gene product [Homo sapiens]	0.00873152	10.0624	47141.7	3417294	1 (1 0 0 0 0)
pol protein [Human immunodeficiency virus 1]	0.0019098	10.0623	62207.7	87246059	1 (1 0 0 0 0)
putative translation initiation factor A121/Sui1 [Homo sapiens]	0.00399283	10.0622	12736.6	4406207	1 (1 0 0 0 0)
ABO glycosyltransferase [Homo sapiens]	0.0062079	10.0617	26806.6	47776296	1 (1 0 0 0 0)
cirrhosis, autosomal recessive 1A (cirhin) [Rattus norvegicus]	0.000619145	10.0614	76814.8	57528225	1 (1 0 0 0 0)
ankyrin repeat and BTB (POZ) domain containing 1 isoform 3 [Homo sapie	0.00180251	10.0611	51107.5	25777626	1 (1 0 0 0 0)
zinc finger protein 740 [Homo sapiens]	0.000384944	10.0607	21842.8	51972182	1 (1 0 0 0 0)
beclin 1 [Homo sapiens]	0.00114326	10.0603	51863.5	4502395	1 (1 0 0 0 0)
envelope glycoprotein [Human immunodeficiency virus 1]	0.0055111	10.0592	14940.8	85822428	1 (1 0 0 0 0)
hCG2036731 [Homo sapiens]	0.00375907	10.059	57299.3	119597400	1 (1 0 0 0 0)
PHD finger [Homo sapiens]	0.00706422	10.059	46404.4	30721751	1 (1 0 0 0 0)
clathrin, light polypeptide A isoform b [Homo sapiens]	0.00421688	10.0582	27060	6005993	1 (1 0 0 0 0)
ACOT9_HUMAN Acyl-coenzyme A thioesterase 9 (Acyl-CoA thioesterase 9) (Acyl-Co	0.000287761	10.0576	46324.6	12229616	2 (0 1 0 0 1)
FLJ00261 protein [Homo sapiens]	0.0024694	10.0573	182188	47077655	2 (0 1 0 0 1)
MARCS_HUMAN Myristoylated alanine-rich C-kinase substrate (MARCKS) (Protein k	0.00171392	10.0573	31535.9	76803798	1 (1 0 0 0 0)
immunoglobulin heavy chain variable region [Homo sapiens]	0.00212857	10.0571	11155.2	121280594	1 (1 0 0 0 0)
E2F3 protein [Homo sapiens]	0.00141921	10.0558	13865.4	71533989	1 (1 0 0 0 0)
A Chain A, Cyclophilin A Complexed With Dipeptide Gly-Pro	0.00102532	10.0557	17869.8	1633054	1 (1 0 0 0 0)
E2 protein [Human papillomavirus type 77]	0.00443131	10.0556	42821.1	2911562	1 (1 0 0 0 0)
zinc finger RNA binding protein [Homo sapiens] [M	0.00272266	10.0555	116939	34101286	1 (1 0 0 0 0)
similar to cell division cycle 10 homolog [Homo sapiens]	0.00412517	10.0555	44819.6	51094727	1 (1 0 0 0 0)
envelope glycoprotein [Human immunodeficiency virus 1]	0.0050505	10.0553	12151.3	67944195	1 (1 0 0 0 0)
envelope glycoprotein precursor gp160 [Human immunodeficiency virus 1]	0.00381993	10.0549	32653.5	86514962	1 (1 0 0 0 0)
hypothetical protein LOC54991 [Homo sapiens]	0.00142893	10.0531	27394.4	40254913	1 (1 0 0 0 0)
gag protein [Human immunodeficiency virus 1]	0.00792569	10.053	55846.5	55560764	1 (1 0 0 0 0)
PRKCA protein [Homo sapiens]	0.00577614	10.053	43157.7	31544941	1 (1 0 0 0 0)
hCG2045624 [Homo sapiens]	0.00151349	10.0516	14710.3	119615888	1 (1 0 0 0 0)
RNA terminal phosphate cyclase-like 1 [Homo sapiens]	0.00390821	10.0513	19874.3	55663523	1 (1 0 0 0 0)
U88 [Human herpesvirus 6A]	0.00972961	10.0512	44094.3	9628390	1 (1 0 0 0 0)
C8orfK32 protein [Homo sapiens]	0.000412182	10.0501	125483	83016723	1 (1 0 0 0 0)
env polypeptide [Human immunodeficiency virus 1] [M	0.000368156	10.0497	59168	8919904	1 (1 0 0 0 0)
telomeric repeat binding factor 2, isoform CRA_a [Homo sapiens]	0.00994034	10.0496	59556.7	119603679	1 (1 0 0 0 0)
F10A5_HUMAN Protein FAM10A5	0.00172825	10.0492	41351.3	74762570	1 (1 0 0 0 0)
peptidylprolyl isomerase-like 2 isoform a [Homo sapiens]	0.00046359	10.0481	58786.7	7657473	1 (1 0 0 0 0)
immunoglobulin heavy chain variable region [Homo sapiens]	0.00128059	10.0474	11173.4	112696233	1 (1 0 0 0 0)
hypothetical protein LOC562704 [Danio rerio]	0.0005333	10.0468	65289.1	71480111	1 (1 0 0 0 0)
tubulin, beta 5 [Mus musculus]	0.00418328	10.0467	49639	7106439	1 (1 0 0 0 0)
BARX1 protein [Homo sapiens]	0.00511267	10.0466	27281.5	39963537	1 (1 0 0 0 0)
S12A3_HUMAN Solute carrier family 12 member 3 (Thiazide-sensitive sodium-chlor	0.00994045	10.0454	113066	1717801	1 (1 0 0 0 0)
pol protein [Human immunodeficiency virus 1]	0.00708891	10.0439	43625.8	22656271	1 (1 0 0 0 0)
hypothetical protein LOC92154 [Homo sapiens]	0.0085298	10.0423	79880.1	46195763	2 (0 0 1 1 0)
hCG1811841 [Homo sapiens]	0.00876759	10.0422	10350.3	119598465	2 (0 0 1 1 0)
pol protein [Human immunodeficiency virus type 1] [M	0.00052221	10.0419	38499.3	17863560	1 (1 0 0 0 0)
ING1_HUMAN Inhibitor of growth protein 1	0.000656735	10.0418	46751.2	41017418	1 (1 0 0 0 0)
RPL35 protein [Homo sapiens]	0.00941494	10.0384	14570.6	15012043	4 (2 0 0 0 2)
OTTHUMP00000042162 [Homo sapiens]	0.00573816	10.0377	71844.9	6572233	1 (1 0 0 0 0)
protein tyrosine phosphatase PEP [Homo sapiens] [MAS	0.00886268	10.0356	9692.7	1572645	1 (1 0 0 0 0)
gag protein [Human immunodeficiency virus 1]	0.00167813	8.15169	55119.2	90812182	2 (1 1 0 0 0)
envelope glycoprotein [Human immunodeficiency virus 1]	0.00137973	8.14402	28555.8	24210076	1 (0 1 0 0 0)
novel protein similar to a human protein associated with Myc [Danio rer	0.000538099	8.14119	335699	26788088	3 (0 0 1 0 2)
polyubiquitin [Homo sapiens]	4.3691e-06	8.13992	68450.1	2627129	1 (0 1 0 0 0)
gp120 [Human immunodeficiency virus 1]	0.00494854	8.138	38115.2	28172510	1 (0 1 0 0 0)
WMBEHQ UL5 protein - human herpesvirus 2 (strain HG52) (fragment)	0.00236856	8.12863	88093.8	74001	3 (0 3 0 0 0)
hemoglobin beta chain [Homo sapiens]	3.87965e-05	8.12783	11015.6	66731527	1 (0 1 0 0 0)
cornichon homolog 3 [Homo sapiens]	0.003457	8.12336	18963.4	22749039	5 (0 3 1 0 1)
AF293342_1 RNF6 protein [Homo sapiens]	0.000806972	8.11979	16669.9	12656363	1 (0 1 0 0 0)
AF166179_1 polyprotein [Human coxsackievirus A9] [MAS	0.00800825	8.11485	14925.1	6752481	2 (0 1 0 0 1)
Na,K-ATPase catalytic subunit alpha-A protein [Homo sapiens]	0.000422787	8.11185	3563.7	5919228	3 (1 2 0 0 0)
epimorphin [Homo sapiens]	0.00398588	8.11161	34621.8	303605	1 (0 1 0 0 0)
pol protein [Human immunodeficiency virus 1]	0.0084566	8.11012	57220.4	116278727	2 (0 1 1 0 0)
V-1 protease [Human immunodeficiency virus 1] [MAS	0.00519849	8.10891	10302.8	10944803	1 (0 1 0 0 0)
I52966 myosin heavy chain 12 - human (fragment)	0.00429272	8.10745	47976	2119311	1 (0 1 0 0 0)
polyribonucleotide nucleotidyltransferase 1 [Homo sapiens]	0.00257625	8.10726	85882.7	24308348	1 (0 1 0 0 0)
unnamed protein product [Homo sapiens]	0.000612183	8.10581	42228.2	7022606	1 (0 1 0 0 0)
NADH dehydrogenase subunit 1 [Homo sapiens]	0.00190336	8.10072	35565	29690757	1 (0 1 0 0 0)
A47546 triacylglycerol lipase (EC 3.1.1.3), hormone-sensitive - human	0.00298571	8.09712	85426.9	1082874	2 (0 0 0 2 0)
unnamed protein product [Homo sapiens]	0.00398786	8.0969	15958.3	29446	1 (0 1 0 0 0)
vpr protein [Human immunodeficiency virus 1]	0.00955604	8.09663	11158.8	33328201	1 (0 1 0 0 0)
envelope glycoprotein [Human immunodeficiency virus 1]	0.00337637	8.09588	12155.3	67944231	1 (0 1 0 0 0)
prion protein [Homo sapiens]	3.79569e-06	8.09431	26866.9	29568940	1 (0 1 0 0 0)
hypothetical protein [Homo sapiens]	0.000232251	8.09254	44836.8	21740037	1 (0 1 0 0 0)
ADP-ribosylation factor GTPase activating protein 1 isoform a [Homo sap	0.000244449	8.09199	44640.3	8922652	3 (0 2 1 0 0)
hCG1750237, isoform CRA_a [Homo sapiens]	0.000547217	8.09165	7092.87	119581276	1 (0 1 0 0 0)
envelope glycoprotein [Human immunodeficiency virus type 1]	0.00441029	8.0915	10941.9	3832045	1 (0 1 0 0 0)
reverse transcriptase [Human immunodeficiency virus 1]	0.000259515	8.09081	24466.5	71845190	1 (0 1 0 0 0)
A unnamed protein product [Homo sapiens]	0.00962332	8.08866	7959.63	119389370	1 (0 1 0 0 0)
protein tyrosine phosphatase, non-receptor type 7, isoform CRA_c [Homo	0.00715843	8.08772	14437.7	119611808	1 (0 1 0 0 0)
pol protein [Human immunodeficiency virus 1]	0.00296281	8.08738	56890.4	42717556	2 (0 1 0 1 0)
envelope glycoprotein [Human immunodeficiency virus 1]	0.00723298	8.08643	13174.5	28916182	1 (0 1 0 0 0)
N-acetyltransferase 11 [Homo sapiens]	0.00377809	8.0862	27206.1	13376119	1 (0 1 0 0 0)
leukocyte-derived arginine aminopeptidase long form variant [Homo sapie	0.00761787	8.08596	110377	32400649	1 (0 1 0 0 0)
AF111846_1 PRO0471 [Homo sapiens]	0.00606411	8.08482	9653.75	6560614	1 (0 1 0 0 0)
KIAA0821 protein [Homo sapiens]	0.00166725	8.08305	172156	40788373	2 (1 1 0 0 0)
guanine nucleotide binding protein (G protein) alpha 12 [Homo sapiens]	0.000820458	8.08268	44251.4	42476111	2 (1 1 0 0 0)
polyprotein [Human enterovirus 90]	0.000175592	8.08099	242996	54873666	1 (0 1 0 0 0)
thrombospondin, type I, domain containing 4 [Homo sapiens]	0.000724933	8.08094	112377	94536854	1 (0 1 0 0 0)
matrix metalloproteinase 7 preproprotein [Homo sapiens]	0.00016746	8.08077	29657.9	4505219	1 (0 1 0 0 0)
hypothetical protein LOC388701 [Homo sapiens]	0.00586549	8.078	12123.1	58293781	1 (0 1 0 0 0)
vpu protein [Human immunodeficiency virus 1]	0.00121045	8.07685	10121.5	73913955	1 (0 1 0 0 0)
immunoglobulin heavy chain variable region [Homo sapiens]	0.00203778	8.07602	12060.8	4837783	1 (0 1 0 0 0)
hypothetical protein LOC51233, isoform CRA_b [Homo sapiens]	0.00512084	8.07492	18838.7	119579990	1 (0 1 0 0 0)
coiled-coil domain containing 134 [Homo sapiens]	0.00306641	8.07463	26544	13376216	1 (0 1 0 0 0)
pol protein [Human immunodeficiency virus type 1] [M	0.00687719	8.07369	8349.19	9454465	1 (0 1 0 0 0)
single-stranded DNA-binding protein [Human herpesvirus 3]	0.00840935	8.07345	132057	9625904	1 (0 1 0 0 0)
immunoglobulin heavy chain VHDJ region [Homo sapiens]	0.00888432	8.07243	13746.7	21670533	1 (0 1 0 0 0)
axonemal dynein heavy chain [Homo sapiens]	0.00935477	8.07189	11827.9	2154771	1 (0 1 0 0 0)
ubiquitin associated and SH3 domain containing, A long form [Homo sapie	0.00802657	8.07166	74075.4	9507221	1 (0 1 0 0 0)
SUPT6H protein [Homo sapiens]	0.00260925	8.07063	122720	13277574	1 (0 1 0 0 0)
gp120 [Human immunodeficiency virus 1]	0.00741872	8.07048	25032.5	28172546	1 (0 1 0 0 0)
CXorf30 [Homo sapiens]	0.000436202	8.07018	47581.8	149588556	2 (0 0 1 0 1)
gag protein [Human immunodeficiency virus 1]	0.00789124	8.06987	12890.4	37701274	3 (0 0 1 1 1)
hemoglobin beta chain [Homo sapiens]	0.00278976	8.06891	4510.41	33694204	2 (0 1 1 0 0)
PTN22_HUMAN Tyrosine-protein phosphatase non-receptor type 22 (Hematopoietic	0.00182472	8.06871	91646.8	20139861	2 (0 0 0 2 0)
FAM40B protein [Homo sapiens]	0.000183734	8.06862	85963.3	17512156	1 (0 1 0 0 0)
SEM4D_HUMAN Semaphorin-4D precursor (Leukocyte activation antigen CD100) (BB18	0.00186514	8.06696	96088.8	8134701	1 (0 1 0 0 0)
ADAM metallopeptidase domain 12 isoform 1 preproprotein [Homo sapiens]	0.00417977	8.06669	99477.6	73747885	2 (0 0 1 0 1)
envelope glycoprotein [Human immunodeficiency virus 1]	0.00576973	8.06617	23974.1	62905540	1 (0 1 0 0 0)
protein phosphatase 2, catalytic subunit, beta isoform [Homo sapiens]	0.00405605	8.06605	35552.3	4758952	1 (0 1 0 0 0)
envelope glycoprotein [Human immunodeficiency virus 1]	0.000562122	8.06587	17469.1	62906615	1 (0 1 0 0 0)
hypothetical protein [Homo sapiens]	0.00324838	8.06568	22200.9	12052750	1 (0 1 0 0 0)
FGF.6 protein [Homo sapiens]	0.00144893	8.06511	14468.5	4467836	1 (0 1 0 0 0)
envelope glycoprotein [Human immunodeficiency virus type 1]	0.0080588	8.06497	53592.4	19568942	1 (0 1 0 0 0)
unnamed protein product [Homo sapiens]	0.00769394	8.06434	15302.6	34532482	1 (0 1 0 0 0)
N-acetyltransferase 12 [Homo sapiens]	0.00892945	8.06398	39218.6	58743373	1 (0 1 0 0 0)
sorting nexin 7 isoform a variant [Homo sapiens] [	0.000624765	8.06312	45315.6	62898019	1 (0 1 0 0 0)
protease [Human immunodeficiency virus 1]	0.00806405	8.06297	9688.31	38425164	1 (0 1 0 0 0)
endozepine-related protein [Homo sapiens]	0.00534037	8.06283	46286.4	30315269	1 (0 1 0 0 0)
capsid protein [Human rotavirus A]	0.00136629	8.06214	38373.9	89112738	1 (0 1 0 0 0)
ABR_HUMAN Active breakpoint cluster region-related protein	0.00434748	8.06183	97635.3	5915668	1 (0 1 0 0 0)
ankyrin repeat domain 18B [Homo sapiens]	0.00678759	8.06163	46835.8	123244400	1 (0 1 0 0 0)
immunoglobulin heavy chain variable region [Homo sapiens]	0.00268303	8.06015	9878.85	91979762	1 (0 1 0 0 0)
AF246940_1 RNA-dependent RNA polymerase [human picobirnavirus]	0.00638819	8.06006	59647.2	12407607	1 (0 1 0 0 0)
hCG2038439 [Homo sapiens]	0.00531228	8.05981	11769	119585851	1 (0 1 0 0 0)
hypothetical protein [Homo sapiens]	0.00483375	8.05941	115359	52546068	1 (0 1 0 0 0)
unnamed protein product [Homo sapiens]	0.00475969	8.05919	37438.8	21753860	2 (0 0 1 0 1)
ZN783_HUMAN Protein ZNF783	0.00250237	8.05887	31403	74722910	1 (0 1 0 0 0)
envelope glycoprotein [Human immunodeficiency virus 1]	0.000151214	8.05865	22334.1	33590818	1 (0 1 0 0 0)
F-box protein 32, isoform CRA_b [Homo sapiens] [MA	0.00352253	8.05857	16900.5	119612447	1 (0 1 0 0 0)
obscurin, cytoskeletal calmodulin and titin-interacting RhoGEF [Homo sa	0.00536829	8.05688	45559.4	56206287	1 (0 1 0 0 0)
CASKIN1 protein [Homo sapiens]	0.004288	8.05687	58748.8	73909120	1 (0 1 0 0 0)
hCG2036788 [Homo sapiens]	0.00461351	8.05578	12499.5	119614925	1 (0 1 0 0 0)
arachidonate 5-lipoxygenase [Homo sapiens]	0.00303339	8.05386	77933.4	4502057	1 (0 1 0 0 0)
hook homolog 1 [Homo sapiens]	0.000773161	8.05263	84594.8	7705415	1 (0 1 0 0 0)
ubiquitin-specific protease 7 isoform [Homo sapiens]	0.00836942	8.04991	128922	34851150	1 (0 1 0 0 0)
hypothetical protein LOC254228 [Homo sapiens]	4.68255e-05	8.04848	35146.6	24308454	1 (0 1 0 0 0)
X-linked phosphate regulating endopeptidase homolog [Homo sapiens]	0.00662616	8.04819	86419	90403592	1 (0 1 0 0 0)
programmed cell death 2, isoform CRA_b [Homo sapiens]	0.00642349	8.04803	39639.1	119567799	2 (0 0 1 0 1)
phosphatidylinositol (4,5) bisphosphate 5-phosphatase, A isoform 1 [Ho	0.00963254	8.04729	70420.4	24307957	1 (0 1 0 0 0)
zinc finger protein 438, isoform CRA_a [Homo sapiens]	0.00707072	8.04687	19874.4	119606401	1 (0 1 0 0 0)
nef protein [Human immunodeficiency virus 1]	0.000286193	8.04572	23606.7	23954634	1 (0 1 0 0 0)
pol [Human betaretrovirus]	0.00886995	8.03623	48077.6	32128370	1 (0 1 0 0 0)
hypothetical protein [Human calicivirus Hu/NLV/Queen's Arms/Leeds/92/UK	0.00578349	6.14565	22089.1	14330431	4 (0 3 1 0 0)
immunoglobulin alpha heavy chain variable region [Homo sapiens]	0.00471191	6.12222	14011.9	62871218	5 (3 0 1 1 0)
gag protein [Human immunodeficiency virus type 1] [M	0.00104388	6.11974	13097.7	7008372	2 (0 1 1 0 0)
AF184368_1 gag protein [Human immunodeficiency virus type 1]	0.00132706	6.09911	20440.3	6815550	3 (1 0 0 1 1)
FLJ00020 protein [Homo sapiens]	0.000248841	6.09596	122574	10440371	2 (0 0 0 1 1)
FELE-1 [Homo sapiens]	0.00332965	6.09406	275266	22779437	2 (0 0 0 1 1)
nucleoprotein [Human metapneumovirus]	0.00986084	6.09168	8066.06	29150724	4 (0 2 2 0 0)
envelope glycoprotein [Human immunodeficiency virus 1]	0.00598768	6.08315	97034	38491487	2 (0 0 0 1 1)
kinesin family member 13A [Homo sapiens]	1.19178e-05	6.08017	202132	21361722	2 (0 0 0 1 1)
beta globin chain variant [Homo sapiens]	0.00278976	6.07682	15987.3	26892090	3 (0 1 2 0 0)
hCG1640638 [Homo sapiens]	0.00159663	6.07416	37985.8	119606716	2 (0 0 0 1 1)
5' nucleotidase, ecto [Homo sapiens]	0.00946919	6.07043	63327.6	4505467	5 (0 2 1 2 0)
surface glycoprotein, Ig superfamily member variant [Homo sapiens] [MAS	0.00475001	6.06761	73496.1	62088372	2 (0 0 0 1 1)
ZBT24_HUMAN Zinc finger and BTB domain-containing protein 24 (Zinc finger pro	0.00297256	6.06756	78232.8	66774228	2 (0 0 0 1 1)
AF060168_1 AS10 protein [Homo sapiens]	0.00549161	6.06202	22122.1	7019231	2 (0 0 0 1 1)
ring finger protein 18 [Homo sapiens]	0.00873702	6.05683	52853.2	9966829	2 (0 0 0 1 1)
hypothetical protein LOC345651 [Homo sapiens]	0.00136868	4.13156	41976	63055057	5 (0 1 2 2 0)
ubiquitin-conjugating enzyme E2E 3 [Homo sapiens]	0.00935477	4.10618	22898.5	5454146	2 (1 0 0 1 0)
ASMTL [Homo sapiens]	0.00205472	4.08269	69693.5	3808148	4 (0 0 1 1 2)
t-SNARE domain containing 1 [Homo sapiens]	0.000529824	4.07352	55790.9	21450719	2 (0 0 0 0 2)
KIAA1979 protein [Homo sapiens]	0.000372556	4.07352	35773.1	18916873	2 (0 0 0 0 2)
