# Supplementary material for: ER stress induced immunopathology involving complement in CADASIL: implications for therapeutics
Source: Acta Neuropathol Commun. 2023 May 8;11:76. doi: 10.1186/s40478-023-01558-1 (PMC10169505; doi:10.1186/s40478-023-01558-1)
Supplement: Supplementary file 5 — Supplementary Material 5 [file 40478_2023_1558_MOESM5_ESM.xlsx]

## Sheet: CADASIL_1_RIPA
ER Stress Induced Immunopathology involving Complement in CADASIL: Implications for Therapeutics
Mahmod Panahi, Yoshiki Hase, Xavier Gallart-Palau, Sumonto Mitra, Atsushi Watanabe, Roger C Low, Yumi Yamamoto, Diego Sepulveda-Falla, Atticus H Hainsworth, Masafumi Ihara, Siu Kwan Sze, Matti Viitanen, Homira Behbahani, Raj N Kalaria
Supplementary information
Supplementary dataset 4: List of total proteins identified by LC-MS/MS in RIPA fractions of CADASIL subjects. Each tab referes to the total proteins identified in each individual.
Description				P-value	Score	MW	Accession	Peptide (Hits)
neurofilament, light polypeptide 68kDa [Homo sapiens]				1.67766e-08	184.187	61479.3	105990539	27 (21 4 1 1 0)
2',3'-cyclic-nucleotide 3'-phosphodiesterase (EC 3.1.4.37)				8.12006e-10	180.289	45070.4	180687	32 (20 6 2 4 0)
neurofilament, medium polypeptide 150kDa [Homo sapiens]				1.18602e-11	178.246	102386	4885513	26 (23 1 1 1 0)
glial fibrillary acidic protein [Homo sapiens]				3.12798e-07	176.159	49849.7	4503979	30 (28 0 1 0 1)
myelin basic protein isoform 1 [Homo sapiens]				5.88401e-09	162.219	21480	68509930	103 (82 9 8 3 1)
unknown [Homo sapiens]				8.55205e-12	130.3	268547	62988842	14 (13 1 0 0 0)
Na+/K+ -ATPase alpha 1 subunit isoform a proprotein [Homo sapiens]				2.3404e-06	116.19	112824	21361181	17 (16 0 1 0 0)
I38369 beta-tubulin - human (fragment)				1.55953e-09	112.164	48848.5	2119276	20 (16 3 1 0 0)
Na+/K+ -ATPase alpha 2 subunit proprotein [Homo sapiens]				3.89429e-10	110.264	112194	4502271	24 (22 1 0 0 1)
brain abundant, membrane attached signal protein 1 [Homo sapiens]				4.82205e-07	110.191	22680	30795231	18 (16 1 0 1 0)
SPTAN1 protein [Homo sapiens]				9.54258e-10	106.156	282106	31565122	13 (8 0 3 2 0)
ATP synthase, H+ transporting, mitochondrial F1 complex, alpha subunit				6.58155e-10	104.208	59713.7	4757810	18 (16 1 1 0 0)
proteolipid protein [Rattus norvegicus]				9.87339e-08	100.207	30057.1	13591880	62 (54 3 3 0 2)
tubulin alpha 6 [Homo sapiens]				3.39609e-10	96.2208	49863.5	14389309	19 (18 0 1 0 0)
Na+,K+ ATPase [Homo sapiens]				6.60308e-07	90.208	111901	1359715	13 (9 3 1 0 0)
A Chain A, Crystal Structure Of A DictyosteliumTETRAHYMENA CHIMERA Actin (Mutan				4.51071e-08	88.2262	41719.9	7245526	20 (16 2 2 0 0)
microtubule-associated protein 1B isoform 1 [Homo sapiens]				4.20321e-05	88.1081	270452	5174525	11 (8 0 0 2 1)
tubulin, beta 4 [Homo sapiens]				9.60216e-10	76.2421	49553.9	21361322	17 (11 4 0 1 1)
ATRB actin, skeletal muscle - rabbit				0.000569015	76.217	41789.8	71611	16 (11 3 0 1 1)
Na+/K+ -ATPase beta 1 subunit isoform a [Homo sapiens]				6.838e-07	66.2021	35038.9	4502277	13 (12 0 1 0 0)
dihydropyrimidinase-like 2 [Homo sapiens]				1.30614e-07	60.1844	62254.7	4503377	9 (9 0 0 0 0)
unnamed protein product [Homo sapiens]				8.05735e-06	60.1342	57919.5	28940	10 (7 0 1 2 0)
brain creatine kinase [Homo sapiens]				5.30305e-08	58.2399	42617.4	21536286	10 (8 1 0 0 1)
neural cell adhesion molecule 1 isoform 3 [Homo sapiens]				6.36093e-08	58.1581	83718	115529478	6 (5 1 0 0 0)
MDHM_HUMAN Malate dehydrogenase, mitochondrial precursor				2.6345e-08	56.1189	35508.8	6648067	6 (5 0 1 0 0)
APOB_HUMAN Apolipoprotein B-100 precursor (Apo B-100) [Contains: Apolipoprotein				0.0090348	56.0695	515242	114014	9 (1 4 1 3 0)
internexin neuronal intermediate filament protein, alpha [Homo sapiens				3.77811e-05	54.13	55357.5	14249342	6 (4 1 1 0 0)
enolase 2 [Homo sapiens]				9.81543e-10	52.2359	47239.1	5803011	7 (5 1 0 1 0)
prostatic binding protein [Homo sapiens]				2.55063e-08	52.1643	21043.7	4505621	6 (5 0 0 0 1)
sirtuin 2 isoform 1 [Homo sapiens]				0.000973157	52.154	43154.5	13775600	7 (5 1 0 1 0)
glyceraldehyde-3-phosphate dehydrogenase [Homo sapiens]				7.39229e-10	50.2021	36030.4	7669492	11 (10 0 1 0 0)
B Chain B, X-Ray Crystal Structure Of Human Galectin-1				1.08085e-08	50.1552	14575.2	42542978	6 (6 0 0 0 0)
GNAO2_HUMAN Guanine nucleotide-binding protein G(o) subunit alpha 2				3.26099e-06	48.1756	40061.1	60416433	9 (8 1 0 0 0)
B Chain B, T-To-T(High) Quaternary Transitions In Human Hemoglobin: Deshis146b				0.000609756	46.2199	15720.2	61679604	7 (4 3 0 0 0)
AT2B4_HUMAN Plasma membrane calcium-transporting ATPase 4 (PMCA4) (Plasma mem				0.00276117	44.1726	137833	14286105	5 (4 0 0 1 0)
syntaxin binding protein 1 isoform a [Homo sapiens]				1.01347e-05	42.1395	68692.3	4507297	6 (5 0 0 0 1)
heavy neurofilament subunit [Homo sapiens]				1.42722e-06	40.1971	111713	1841430	9 (8 0 0 1 0)
guanine nucleotide-binding protein, beta-1 subunit [Mus musculus]				6.11922e-06	40.1612	37353	6680045	7 (6 1 0 0 0)
tubulin, alpha 1B [Mus musculus]				4.88411e-07	40.1557	50119.6	34740335	8 (8 0 0 0 0)
KIAA0325 protein [Homo sapiens]				2.81804e-06	40.1159	533404	71891782	6 (2 1 1 1 1)
bromodomain containing protein 1 [Homo sapiens]				0.00728292	40.0889	119444	11321642	5 (1 3 1 0 0)
autogenous vein graft remodeling associated protein 8 [Homo sapiens] [				0.00594254	40.0553	80577.5	125858428	5 (2 1 2 0 0)
pyruvate dehydrogenase (lipoamide) beta [Homo sapiens]				1.00736e-06	38.1897	39224.1	4505687	4 (3 1 0 0 0)
STX1B_HUMAN Syntaxin-1B1 (Syntaxin 1B)				1.06442e-08	38.1586	33410.1	2501085	6 (5 1 0 0 0)
ATP synthase, H+ transporting, mitochondrial F0 complex, subunit d isof				3.34146e-07	38.1495	18479.5	5453559	6 (5 1 0 0 0)
WMBEHQ UL5 protein - human herpesvirus 2 (strain HG52) (fragment)				0.00278613	38.1376	88093.8	74001	13 (3 7 1 2 0)
breast carcinoma amplified sequence 1 [Homo sapiens]				3.719e-06	36.1493	61681.5	4502373	5 (2 0 2 1 0)
clathrin heavy chain 1 [Homo sapiens]				0.000145722	36.1481	191492	4758012	5 (2 1 1 0 1)
myelin oligodendrocyte glycoprotein [Homo sapiens] [M				3.53843e-05	36.1436	28175	793839	7 (4 2 1 0 0)
synaptotagmin I [Homo sapiens]				0.000209982	36.1064	47542.8	5032139	6 (4 1 1 0 0)
KIAA0191 [Homo sapiens]				0.00801055	36.0723	171002	1228035	5 (2 1 1 0 1)
KIAA1506 protein [Homo sapiens]				0.00726733	36.0508	361910	20521928	4 (2 2 0 0 0)
heat shock 70kDa protein 5 [Homo sapiens]				3.106e-06	34.1647	72288.5	16507237	5 (4 0 0 1 0)
unnamed protein product [Homo sapiens]				4.0232e-07	34.1498	49811	10433717	5 (1 3 1 0 0)
Nogo-A protein [Homo sapiens]				0.000809137	34.1293	129861	9408096	4 (3 0 0 1 0)
KIAA0624 protein [Homo sapiens]				0.00871281	34.0818	221820	3327062	6 (1 1 3 1 0)
hCG2012292 [Homo sapiens]				0.00106453	34.0727	193537	119629612	5 (1 2 1 0 1)
tubulin polymerization promoting protein [Homo sapiens]				4.12258e-10	30.2111	23679.2	5902018	3 (3 0 0 0 0)
solute carrier family 25 (mitochondrial carrier; adenine nucleotide tr				3.28953e-07	30.1597	33043.2	55749577	5 (5 0 0 0 0)
chaperonin [Homo sapiens]				1.21556e-06	30.1518	61016.5	31542947	3 (3 0 0 0 0)
synaptosomal-associated protein 25 isoform SNAP25A [Homo sapiens]				3.60144e-05	30.124	23321.2	18765733	7 (5 0 1 1 0)
cytochrome c oxidase subunit VIb [Homo sapiens]				0.000116378	30.0852	10185.7	4502985	3 (3 0 0 0 0)
leucine-rich repeat-containing 8 [Homo sapiens]				0.00338099	30.0772	94138.8	62241040	3 (3 0 0 0 0)
chromosome 17 open reading frame 27 [Homo sapiens]				0.00535204	30.0706	373741	66571327	3 (3 0 0 0 0)
prosaposin isoform a preproprotein [Homo sapiens]				1.63203e-06	28.1921	58073.9	11386147	5 (3 2 0 0 0)
tubulin, beta, 4 [Homo sapiens]				1.44438e-07	28.1133	50400.3	50592996	6 (4 1 1 0 0)
CD92 protein [Homo sapiens]				0.00498167	28.0903	72933.4	16945323	4 (1 2 0 0 1)
3-oxoacid CoA transferase 1 precursor [Homo sapiens]				0.000167393	28.0755	56122	4557817	3 (2 1 0 0 0)
obscurin, cytoskeletal calmodulin and titin-interacting RhoGEF isoform				0.000105859	28.0635	721127	58331253	25 (3 1 1 16 4)
MYH10_HUMAN Myosin-10 (Myosin heavy chain 10) (Myosin heavy chain, nonmuscle I				0.00454402	26.1025	228797	1346640	5 (1 0 2 0 2)
DHPR_HUMAN Dihydropteridine reductase (HDHPR) (Quinoid dihydropteridine redu				2.03872e-05	26.0904	25773	118572639	4 (3 0 1 0 0)
myristoylated alanine-rich protein kinase C substrate [Homo sapiens]				0.00131531	26.0777	31525.9	11125772	4 (1 1 0 2 0)
TXLNB_HUMAN Beta-taxilin (Muscle-derived protein 77) (hMDP77)				0.00947014	26.0653	76472.1	55583953	3 (2 0 1 0 0)
CD9 antigen [Homo sapiens]				4.45488e-06	24.2541	25399	4502693	5 (4 0 0 1 0)
G01650 malate dehydrogenase (EC 1.1.1.37), cytosolic - human [M				2.44708e-07	24.1747	36392	7431153	3 (2 0 0 1 0)
tyrosine 3/tryptophan 5 -monooxygenase activation protein, zeta polypep				2.50262e-08	24.1498	27727.7	4507953	3 (2 0 0 1 0)
KIAA1603 protein [Homo sapiens]				0.00798013	24.1048	190236	29421202	4 (1 1 0 1 1)
U75 [Human herpesvirus 7]				0.00205861	24.0853	29356.5	51874297	3 (2 0 0 1 0)
A30802 Ca2+-transporting ATPase (EC 3.6.3.8) 2, plasma membrane - human				0.000805075	24.0842	134625	86988	3 (2 0 0 1 0)
pyruvate kinase 3 isoform 1 [Homo sapiens]				0.00257224	24.0836	57900.2	33286418	3 (1 1 1 0 0)
annexin VI isoform 1 [Homo sapiens]				0.00144546	24.0763	75825.7	71773329	3 (2 0 0 1 0)
U28 [Human herpesvirus 7]				0.000164259	24.0614	93009.1	51874250	3 (2 0 0 1 0)
SHPS1_HUMAN Tyrosine-protein phosphatase non-receptor type substrate 1 precur				2.21542e-10	22.2013	54778.7	29427656	3 (2 0 0 0 1)
A Chain A, Crystal Structure Of Human Cd81 Extracellular Domain, A Receptor Fo				2.70009e-05	22.1726	9898.87	13399775	3 (2 0 0 0 1)
proteoglycan PG-M(V3) [Homo sapiens]				5.05406e-07	22.1294	74200.6	1008913	3 (1 1 0 1 0)
hCG1997024 [Homo sapiens]				0.00449156	22.1129	12311.3	119620147	4 (2 1 0 1 0)
KIAA0856 protein [Homo sapiens]				0.00555533	22.112	250097	20521676	4 (1 1 0 0 2)
ral guanine nucleotide dissociation stimulator-like 2, isoform CRA_c [H				0.00347603	22.094	43158.4	119624115	3 (2 0 0 0 1)
titin [Homo sapiens]				0.00374815	22.0765	121126	37193	3 (2 0 0 0 1)
timeless homolog [Homo sapiens]				0.00791321	22.0712	138544	4507507	3 (2 0 0 0 1)
S66264 55.11 protein homolog - human (fragment)				0.00570067	22.0631	99252.7	2134674	3 (1 1 0 1 0)
unnamed protein product [Homo sapiens]				0.00350872	22.0503	114961	21749523	3 (2 0 0 0 1)
vesicle-associated membrane protein 2 (synaptobrevin 2) [Homo sapiens]				4.29656e-13	20.2091	12640.7	7657675	4 (4 0 0 0 0)
cofilin 1 (non-muscle) [Homo sapiens]				2.85605e-06	20.1839	18490.7	5031635	2 (2 0 0 0 0)
A Chain A, Crystal Structure Of Caenorhabditis Elegans Mg-Atp Actin Complexed				6.05752e-07	20.1834	41637.7	14278147	4 (2 2 0 0 0)
crystallin, alpha B [Homo sapiens]				2.18099e-08	20.1804	20146.4	4503057	2 (2 0 0 0 0)
visinin-like 1 [Mus musculus]				2.18297e-06	20.1749	22128	6755983	3 (3 0 0 0 0)
N-myc downstream-regulated gene 2 isoform a [Homo sapiens]				3.46045e-08	20.1745	40772.2	42544211	2 (2 0 0 0 0)
KRHU2 keratin 1, type II, cytoskeletal - human				1.36219e-05	20.169	65454.4	7428712	4 (3 1 0 0 0)
synaptosomal-associated protein, 25kDa [Homo sapiens]				1.1987e-05	20.1665	10676	24740601	3 (3 0 0 0 0)
alpha-spectrin [Homo sapiens]				8.69158e-06	20.1462	43790.8	829111	2 (2 0 0 0 0)
hypothetical protein [Homo sapiens]				0.0059084	20.1406	110722	52545742	2 (2 0 0 0 0)
guanine nucleotide binding protein (G protein), gamma 2 subunit [Mus mu				0.000378521	20.1362	7845.03	6754020	3 (2 0 0 1 0)
ras related v-ral simian leukemia viral oncogene homolog A [Homo sapie				4.24491e-05	20.1302	23552	33946329	3 (3 0 0 0 0)
potassium channel, subfamily K, member 13 [Homo sapiens]				0.00148262	20.1194	45361.9	16306555	3 (1 0 1 1 0)
dihydrolipoamide dehydrogenase precursor [Homo sapiens]				5.79353e-05	20.1146	54143.1	91199540	2 (2 0 0 0 0)
tubulin, beta 2 [Homo sapiens]				1.67871e-07	20.1143	49875	4507729	3 (3 0 0 0 0)
heat shock 70kDa protein 8 isoform 2 [Homo sapiens]				0.000145045	20.113	53484.5	24234686	3 (3 0 0 0 0)
cul-3 [Homo sapiens]				8.25465e-05	20.1089	39250.4	3360457	2 (2 0 0 0 0)
myelin basic protein isoform 4 [Homo sapiens]				0.00134819	20.1044	17332.8	68509932	5 (5 0 0 0 0)
tubulin, alpha-like 3 [Homo sapiens]				0.000537071	20.0999	49876.8	13376181	3 (2 0 1 0 0)
syntaxin 1A (brain) [Homo sapiens]				0.000113357	20.0887	33002.7	4759182	2 (2 0 0 0 0)
Ras-interacting protein 1 [Homo sapiens]				0.00613439	20.0818	103393	38570105	3 (1 1 0 0 1)
KIAA2017 protein [Homo sapiens]				0.00350931	20.0749	349280	71891721	2 (2 0 0 0 0)
claudin 11 [Homo sapiens]				3.66986e-06	20.0734	21978.4	10938016	3 (3 0 0 0 0)
mitochondrial short-chain enoyl-coenzyme A hydratase 1 precursor [Homo				0.000258628	20.0728	31351.1	12707570	2 (2 0 0 0 0)
gelsolin isoform a precursor [Homo sapiens]				0.000342127	20.072	85644.2	4504165	2 (2 0 0 0 0)
tau-tubulin kinase [Homo sapiens]				0.00407095	20.07	182352	27451602	2 (2 0 0 0 0)
coatomer protein complex, subunit gamma 1 [Homo sapiens]				0.00486948	20.0628	97655.6	11559929	2 (2 0 0 0 0)
hypothetical protein [Homo sapiens]				0.00144896	20.0547	18150.4	21740133	2 (2 0 0 0 0)
keratin [Homo sapiens]				1.41751e-05	18.169	51303.3	1200072	5 (1 3 0 0 1)
KIAA0553 protein [Homo sapiens]				0.00380181	18.1211	157862	58257658	2 (1 1 0 0 0)
RAB3A, member RAS oncogene family [Homo sapiens]				0.000465817	18.1172	24968.1	4506367	2 (1 1 0 0 0)
neural precursor cell expressed, developmentally down-regulated 9 isofo				0.00297071	18.1108	92802.4	5453680	3 (2 1 0 0 0)
PKHA4_HUMAN Pleckstrin homology domain-containing family A member 4 (Phosphoi				0.0055219	18.1077	85349.1	48474644	2 (1 1 0 0 0)
alpha actinin 4 [Homo sapiens]				0.000687873	18.1073	102204	2804273	2 (1 1 0 0 0)
5'-nucleotidase domain containing 3 isoform 2 [Homo sapiens]				0.00902308	18.0824	55685.2	7706749	2 (1 1 0 0 0)
neurogenic differentiation 6 [Homo sapiens]				0.0028743	18.0789	38680.3	27475985	26 (4 8 9 4 1)
KIAA0041 [Homo sapiens]				0.000720095	18.0751	88243.3	27529706	2 (1 1 0 0 0)
B46091 H+-exporting ATPase (EC 3.6.3.6) chain A, vacuolar (VA68 type) - human				0.00771177	18.0719	68204.5	1082432	2 (1 1 0 0 0)
A Chain A, Human Heart L-Lactate Dehydrogenase H Chain, Ternary Complex With N				0.00997091	18.0684	36484.1	13786847	2 (1 1 0 0 0)
glycerol-3-phosphate dehydrogenase 2 (mitochondrial) [Homo sapiens				0.00310214	18.0673	80782.6	133908614	3 (0 1 1 1 0)
KIAA0143 [Homo sapiens]				0.00628451	18.0607	98798	1469868	4 (1 0 0 2 1)
DNA topoisomerase (ATP-hydrolysing); topoisomerase II beta [Homo sapiens				0.00932008	18.0571	80364.7	4218208	2 (1 1 0 0 0)
peroxiredoxin 2 isoform a [Homo sapiens]				3.02525e-07	16.15	21878.2	32189392	2 (1 0 1 0 0)
guanine nucleotide-binding protein, beta-2 subunit [Mus musculus]				7.47797e-07	16.1375	37307.1	13937391	2 (1 0 1 0 0)
A54770 N-acetylglucosamine-specific receptor 1 precursor - human				0.0048296	16.1192	52304.9	627551	4 (0 2 0 2 0)
ENV_HV2D1 Envelope glycoprotein gp160 precursor (Env polyprotein) [Contains: Su				0.00403651	16.0949	97116.6	119455	2 (1 0 1 0 0)
sideroflexin 1 [Homo sapiens]				0.00184064	16.0943	35596.3	23618867	2 (1 0 1 0 0)
unnamed protein product [Homo sapiens]				0.00977804	16.0922	37237.2	16552323	2 (0 2 0 0 0)
UFO_HUMAN Tyrosine-protein kinase receptor UFO precursor (AXL oncogene)				0.00627715	16.0914	97374.7	48429194	2 (0 2 0 0 0)
KIAA0070 [Homo sapiens]				0.00790417	16.0856	68359.9	505108	2 (0 2 0 0 0)
regulator of G-protein signalling 12 isoform 1 [Homo sapiens]				0.00620296	16.0807	156260	38327601	2 (1 0 1 0 0)
72.1 protein [Homo sapiens]				0.00645135	16.0795	17802.2	439656	2 (0 2 0 0 0)
unnamed protein product [Homo sapiens]				0.00619027	16.0786	27940.9	7023532	2 (0 2 0 0 0)
reverse transcriptase [Human immunodeficiency virus 1]				0.00798607	16.0784	4791.39	4520541	3 (1 1 1 0 0)
solute carrier family 8 member 3 isoform A precursor [Homo sapiens]				0.000630867	16.0722	102737	15147254	2 (1 0 1 0 0)
Tax1 (human T-cell leukemia virus type I) binding protein 1 [Xenopus t				0.00923099	16.0679	97019.9	45361339	2 (1 0 1 0 0)
U48, glycoprotein H, gH [Human herpesvirus 6A]				0.00342019	16.0618	79503.8	9628350	2 (1 0 1 0 0)
unnamed protein product [Homo sapiens]				0.0090219	16.0592	52610.6	16553131	2 (1 0 1 0 0)
unnamed protein product [Homo sapiens]				0.00596721	16.0573	77102.7	14041976	2 (1 0 1 0 0)
KIAA1620 protein [Homo sapiens]				0.00254723	16.054	148334	10047317	2 (1 0 1 0 0)
zinc finger protein 33A isoform b [Homo sapiens]				0.00596932	16.0533	94322.9	28274682	3 (1 0 0 1 1)
prostaglandin H2 D-isomerase [Homo sapiens]				0.000143941	14.1725	21015.3	32171249	2 (1 0 0 1 0)
IMMT_HUMAN Mitochondrial inner membrane protein (Mitofilin) (p87/89) (Prolife				1.57764e-08	14.1405	83626.5	29427676	2 (1 0 0 1 0)
synaptophysin [Homo sapiens]				5.48397e-05	14.1123	32083.5	899301	2 (1 0 0 1 0)
hypothetical protein LOC92345 [Homo sapiens]				0.00637683	14.1084	53669.2	19923911	2 (1 0 0 1 0)
hypothetical protein [Homo sapiens]				0.0081051	14.1047	120235	50949774	2 (1 0 0 1 0)
SI:bZ6L08.1 (novel protein similar to human cadherin, EGF LAG seven-pas				0.000275573	14.1037	197357	26788046	4 (0 0 2 1 1)
transforming acidic coiled coil 2, long isoform [Homo sapiens]				0.00947378	14.089	309211	28933422	2 (0 1 1 0 0)
R Chain R, Twinning In Crystals Of Human Skeletal Muscle D- Glyceraldehyde-3-Pho				0.00457596	14.0799	35853.3	230867	2 (0 1 1 0 0)
unnamed protein product [Homo sapiens]				0.00734296	14.0772	24317.8	34527265	2 (1 0 0 1 0)
AF154671_1 CRB1 [Homo sapiens]				0.00454573	14.0741	151312	6014482	2 (0 1 1 0 0)
protein tyrosine phosphatase, non-receptor type 6 isoform 2 [Homo sapi				0.00635212	14.0667	67677.2	18104991	2 (1 0 0 1 0)
envelope glycoprotein [Human immunodeficiency virus 1]				0.00290016	14.06	95660.2	86753469	2 (0 1 1 0 0)
NCK interacting protein with SH3 domain isoform 2 [Homo sapiens]				0.00461736	14.059	78187.9	37577148	2 (0 1 1 0 0)
unknown [Homo sapiens]				0.00467898	14.0534	67813.6	62702366	2 (1 0 0 1 0)
hypothetical protein LOC257169 [Homo sapiens]				0.0017944	14.046	52188.7	22749539	2 (0 1 1 0 0)
putative protein O-mannosyltransferase [Homo sapiens]				0.00334632	14.042	84159.8	32455271	2 (0 1 1 0 0)
tubulin, beta, 2 [Homo sapiens]				4.0232e-07	12.1616	49799	5174735	3 (1 0 2 0 0)
tenascin-R [Homo sapiens]				6.29999e-05	12.1492	149479	1617316	3 (2 0 0 0 1)
fiber protein [Human adenovirus type 6]				0.000313579	12.1392	55732.1	42407273	3 (0 2 0 1 0)
angiopoietin-like 7 [Homo sapiens]				0.00996974	12.1233	39992.7	10863949	2 (0 0 2 0 0)
KIAA0425 [Homo sapiens]				0.000671356	12.0996	141056	40788254	3 (1 1 0 0 1)
zinc finger, CDGSH-type domain 1 [Homo sapiens]				5.57339e-05	12.0955	12191.2	8923930	4 (3 0 0 0 1)
mitochondrial ribosomal protein L22 isoform a [Homo sapiens]				0.00440215	12.0951	23625.6	21265040	4 (0 0 1 1 2)
PYM protein [Homo sapiens]				0.00625822	12.0927	22628	23477161	3 (0 1 1 1 0)
U81 [Human herpesvirus 7]				0.00250375	12.0825	28987	51874301	2 (1 0 0 0 1)
hypothetical protein [Homo sapiens]				0.00941764	12.0751	66463.7	21739618	2 (0 1 0 1 0)
UBP24_HUMAN Ubiquitin carboxyl-terminal hydrolase 24 (Ubiquitin thioesterase				0.00576166	12.0684	210933	85681902	3 (1 0 1 0 1)
AF105369_1 actin-associated protein 2E4/kaptin [Homo sapiens]				0.00171953	12.0672	54800.3	5081380	2 (0 1 0 1 0)
arginyl-tRNA synthetase; ArgRS [Homo sapiens]				0.00435604	12.0664	74929.8	1217668	3 (1 0 0 1 1)
hCG1793591 [Homo sapiens]				0.00539355	12.066	17587.6	119593351	2 (1 0 0 0 1)
hypothetical protein [Homo sapiens]				0.00111383	12.0651	73052	21734051	3 (0 1 1 1 0)
integrin beta 4 [Homo sapiens]				0.00680268	12.0641	207485	6453380	2 (0 0 2 0 0)
phospholipase D1, phophatidylcholine-specific [Homo sapiens]				0.00523903	12.0616	124106	4505873	2 (1 0 0 0 1)
DNM3A_HUMAN DNA (cytosine-5)-methyltransferase 3A (Dnmt3a) (DNA methyltransfe				0.00815407	12.0595	101494	20532391	2 (1 0 0 0 1)
sortilin-related receptor containing LDLR class A repeats preproprotein				0.00835829	12.0583	248280	4507157	2 (0 1 0 1 0)
hypothetical protein DDBDRAFT_0217344 [Dictyostelium discoideum AX4]				0.00604692	12.058	45795.6	66822385	2 (1 0 0 0 1)
TFIIF (Transcription Factor II) largest subunit; involved in both trans				0.00660556	12.057	82144.1	6321625	2 (0 1 0 1 0)
unnamed protein product [Homo sapiens]				0.00654285	12.0567	55316.9	14042850	2 (1 0 0 0 1)
KIAA1286 protein [Homo sapiens]				0.000963311	12.0546	136513	6331389	2 (1 0 0 0 1)
histone H2A [Homo sapiens]				8.54175e-08	10.2708	13986.8	28195394	3 (3 0 0 0 0)
tubulin, alpha 1a [Mus musculus]				4.4137e-06	10.2339	49927.7	6678465	1 (1 0 0 0 0)
Chain , Calponin Homology (Ch) Domain From Human Beta-Spectrin				1.25766e-11	10.2314	12559.3	2914153	1 (1 0 0 0 0)
S100 calcium-binding protein, beta [Homo sapiens]				1.74033e-09	10.2195	10706	5454034	1 (1 0 0 0 0)
histone H2B [Homo sapiens]				1.6125e-07	10.215	13927.6	1568557	1 (1 0 0 0 0)
guanine nucleotide binding protein, alpha activating polypeptide O [Ho				0.000157072	10.1778	40024.9	10567816	2 (2 0 0 0 0)
beta actin [Homo sapiens]				1.13e-09	10.1767	41709.7	4501885	1 (1 0 0 0 0)
H2A histone family, member O [Homo sapiens]				8.79698e-06	10.1761	14086.9	4504251	2 (2 0 0 0 0)
fructose bisphosphate aldolase [Homo sapiens]				8.79157e-07	10.1734	39417.2	312137	1 (1 0 0 0 0)
calnexin precursor [Homo sapiens]				9.22017e-09	10.1647	67526	10716563	2 (2 0 0 0 0)
sarco/endoplasmic reticulum Ca2+ -ATPase [Homo sapiens]				1.91351e-06	10.1638	112442	3021396	1 (1 0 0 0 0)
AF471460_1 Ig heavy chain variable region, VH3 family [Homo sapiens] [MAS				0.000942282	10.1618	13217.3	33319464	1 (1 0 0 0 0)
H2A histone family, member A [Homo sapiens]				2.71266e-06	10.1579	14127	10645195	2 (1 1 0 0 0)
ENO1B_HUMAN Alpha-enolase, lung specific (2-phospho-D-glycerate hydro-lyase) (N				1.10934e-05	10.1574	49446.4	729422	2 (1 1 0 0 0)
catechol-O-methyltransferase isoform MB-COMT [Homo sapiens]				4.64451e-05	10.1564	30017.6	4502969	1 (1 0 0 0 0)
calmodulin [Homo sapiens]				0.000332178	10.1551	17152	825635	2 (2 0 0 0 0)
bridging integrator 1 isoform 1 [Homo sapiens]				0.00262336	10.1519	64659.6	21536400	2 (2 0 0 0 0)
Thy-1 cell surface antigen [Homo sapiens]				3.05519e-05	10.1499	17923.3	19923362	2 (2 0 0 0 0)
syntaxin 1B2 [Rattus norvegicus]				2.23352e-06	10.1489	33223.8	6981600	1 (1 0 0 0 0)
AF138453_1 envelope glycoprotein [Human immunodeficiency virus type 1] [MA				0.00192502	10.1475	22264.1	6958810	1 (1 0 0 0 0)
cytochrome c oxidase subunit VIIa polypeptide 2 (liver) precursor [Homo				0.0018097	10.1452	9390.1	4502989	1 (1 0 0 0 0)
FXYD domain-containing ion transport regulator 6 [Homo sapiens]				5.15717e-06	10.145	10535.4	11612655	2 (2 0 0 0 0)
synaptosomal-associated protein 25 [Mus musculus]				0.000160094	10.142	23300.2	6755588	2 (1 0 0 0 1)
DCTN2_HUMAN Dynactin subunit 2 (Dynactin complex 50 kDa subunit) (50 kDa dyne				7.43067e-06	10.1365	44203.9	22096346	1 (1 0 0 0 0)
AF166243_1 polyprotein [Human coxsackievirus A9]				0.00154023	10.1363	14608	6752609	1 (1 0 0 0 0)
Cytochrome c oxidase subunit Va [Homo sapiens]				0.000159391	10.1345	16751.7	18999392	2 (2 0 0 0 0)
gp120 [Human immunodeficiency virus 1]				0.00203868	10.1306	38115.2	28172510	2 (0 1 0 0 1)
heat shock 70kDa protein 2 [Homo sapiens]				1.3667e-06	10.1194	69978	13676857	1 (1 0 0 0 0)
immunoglobulin superfamily, member 8 [Homo sapiens]				0.000139812	10.119	64993.6	16445029	1 (1 0 0 0 0)
KIAA1379 protein [Homo sapiens]				4.27964e-05	10.1138	52337.5	20521900	1 (1 0 0 0 0)
A40671 dynamin, internal form 1, long C-terminal form - human [M				0.000200237	10.1131	97201	539580	1 (1 0 0 0 0)
TBB4Q_HUMAN Tubulin beta-4q chain				0.000452587	10.1128	48403.5	12643363	1 (1 0 0 0 0)
enolase 1 [Homo sapiens]				2.60924e-06	10.1127	47139.4	4503571	2 (1 1 0 0 0)
neurofilament, light polypeptide 68kDa, isoform CRA_b [Homo sapiens] [M				0.00121197	10.1121	56924	119584005	1 (1 0 0 0 0)
brain link protein-1 [Homo sapiens]				0.000324932	10.1103	37751.1	11141887	2 (2 0 0 0 0)
solute carrier family 17, member 7 [Homo sapiens]				5.78055e-05	10.1096	61573.3	9945322	3 (2 0 1 0 0)
A Chain A, Crystal Structure Of Constant Regulatory Domain Of Human Pp2a, Pr65a				0.00632641	10.1088	65136.1	4558258	1 (1 0 0 0 0)
unnamed protein product [Homo sapiens]				0.00887357	10.1065	15958.3	29446	1 (1 0 0 0 0)
BORF2 [Human herpesvirus 4 type 1]				0.000896566	10.1044	92970.9	82503213	1 (1 0 0 0 0)
NeshBP [Homo sapiens]				0.0064129	10.1037	53855.2	13111480	1 (1 0 0 0 0)
HSP71_HUMAN Heat shock 70 kDa protein 1 (HSP70.1) (HSP70-1/HSP70-2)				0.00156362	10.1014	70009.2	147744565	1 (1 0 0 0 0)
A Chain A, Kinetic Analysis Of Product Inhibition In Human Manganese Superoxid				0.000790556	10.1008	22075.2	14488599	2 (2 0 0 0 0)
E1 [Human papillomavirus type 16]				0.00633713	10.1006	72840.5	56462981	1 (1 0 0 0 0)
RAB3B, member RAS oncogene family [Homo sapiens]				0.000565591	10.1002	24742.1	19923750	1 (1 0 0 0 0)
ATP synthase, H+ transporting, mitochondrial F1 complex, beta subunit				2.1273e-05	10.0994	56524.7	32189394	3 (1 2 0 0 0)
ATPase, H+ transporting, lysosomal 50/57kDa, V1 subunit H isoform 2 [H				0.00012958	10.0988	55847.1	47717102	1 (1 0 0 0 0)
cell adhesion molecule 3 [Homo sapiens]				0.000140045	10.0983	46991.5	11056046	1 (1 0 0 0 0)
beta-tubulin [Homo sapiens]				0.00129516	10.0982	50485.3	1297274	1 (1 0 0 0 0)
solute carrier family 9 (sodium/hydrogen exchanger), isoform 3 regulato				0.00325469	10.0974	38844.6	4759140	1 (1 0 0 0 0)
GDAP1_HUMAN Ganglioside-induced differentiation-associated protein 1 (GDAP1)				0.00317608	10.0972	41225.8	38257679	1 (1 0 0 0 0)
unknown [Homo sapiens]				0.000493472	10.0968	7659.7	63991529	1 (1 0 0 0 0)
hypothetical protein [Homo sapiens]				0.00275094	10.0955	47524.3	21739836	1 (1 0 0 0 0)
A Chain A, Human Prion Protein				0.000724941	10.0948	22876.6	6730485	1 (1 0 0 0 0)
TPA: TPA_exp: keratin 5c [Homo sapiens]				0.000929244	10.0927	59333.4	27764565	1 (1 0 0 0 0)
reverse transcriptase [Human immunodeficiency virus 1]				0.00538181	10.0915	22563.8	67080330	2 (2 0 0 0 0)
HA21_HUMAN HLA class II histocompatibility antigen, DQ(1) alpha chain precursor				0.000489258	10.0904	28087.4	122184	1 (1 0 0 0 0)
U81842_1 Vpr protein [Human immunodeficiency virus type 2]				0.00282836	10.0902	11497.9	6648564	1 (1 0 0 0 0)
T-cell receptor beta chain [Homo sapiens]				0.00589925	10.0893	5123.53	4028333	1 (1 0 0 0 0)
chromosome 8 open reading frame 53, isoform CRA_c [Homo sapiens]				0.0054325	10.0892	12577.8	119612368	1 (1 0 0 0 0)
major capsid protein VP1 [Human enterovirus 70] [MAS				0.00721864	10.089	34002.2	563965	1 (1 0 0 0 0)
AF183419_1 GTP:AMP phosphotransferase [Homo sapiens]				0.00595639	10.0871	18180.6	9963777	1 (1 0 0 0 0)
heterogeneous nuclear ribonucleoprotein D-like [Homo sapiens]				0.00525901	10.087	46409	14110407	1 (1 0 0 0 0)
KIAA0821 protein [Homo sapiens]				0.00411861	10.0868	172156	40788373	1 (1 0 0 0 0)
A Chain A, Crystal Structure Of The Catalytic Domain Of Human Matrix Metallopr				0.00290557	10.0852	18507	47168608	5 (4 1 0 0 0)
gp120 [Human immunodeficiency virus 1]				0.000860874	10.0847	7897.05	9968273	1 (1 0 0 0 0)
hCG2001043 [Homo sapiens]				0.000605334	10.0844	7365.82	119604816	1 (1 0 0 0 0)
Chain , Human Rhoa Complexed With Gtp Analogue				0.00873798	10.0837	20557.3	3318980	1 (1 0 0 0 0)
reverse transcriptase [Human immunodeficiency virus 1]				0.00382931	10.0829	24456.5	71844214	1 (1 0 0 0 0)
envelope glycoprotein [Human immunodeficiency virus 1]				0.00527709	10.0822	96579.4	62997579	1 (1 0 0 0 0)
ubiquinol-cytochrome c reductase binding protein [Homo sapiens]				4.98048e-05	10.0819	13522	5454152	1 (1 0 0 0 0)
hypothetical protein LOC54967 isoform 1 [Homo sapiens]				0.00130891	10.0812	29033.8	72534700	1 (1 0 0 0 0)
Vif protein [Human immunodeficiency virus 1]				0.0056192	10.0808	22661.8	7416634	1 (1 0 0 0 0)
carnitine O-octanoyltransferase [Homo sapiens]				0.00623519	10.0802	70133.4	31542325	2 (2 0 0 0 0)
hypothetical protein LOC644815 [Homo sapiens]				0.00768716	10.0802	90778.9	115392150	1 (1 0 0 0 0)
hCG1750237, isoform CRA_a [Homo sapiens]				0.0024503	10.0793	7092.87	119581276	1 (1 0 0 0 0)
chordin-like 2, isoform CRA_a [Homo sapiens]				0.00766862	10.0793	11657.7	119595350	4 (1 2 0 0 1)
ADP-ribosylation factor 3 [Homo sapiens]				0.00739301	10.0792	20587.7	4502203	1 (1 0 0 0 0)
KIAA0968 protein [Homo sapiens]				0.00349075	10.0787	58985.2	4589580	3 (3 0 0 0 0)
N Chain N, Mutant Monomer Of Recombinant Human Hexokinase Type I Complexed With				0.000238732	10.0783	102383	7245424	2 (0 1 0 0 1)
gag protein [Human immunodeficiency virus type 1] [M				0.00721923	10.0775	10927.4	2587199	1 (1 0 0 0 0)
period homolog 3 (Drosophila), isoform CRA_c [Homo sapiens]				0.00660107	10.0772	129087	119591991	1 (1 0 0 0 0)
pol protein [Human immunodeficiency virus 1]				0.00969674	10.0768	10518.2	116272820	1 (1 0 0 0 0)
tyrosine 3/tryptophan 5 -monooxygenase activation protein, theta polype				0.00148262	10.0761	27746.8	5803227	1 (1 0 0 0 0)
MARCS_HUMAN Myristoylated alanine-rich C-kinase substrate (MARCKS) (Protein k				0.000991476	10.0754	31535.9	76803798	1 (1 0 0 0 0)
RM37_HUMAN 39S ribosomal protein L37, mitochondrial precursor (L37mt) (MRP-L3				0.000155767	10.0751	48071.2	74717744	2 (0 0 1 1 0)
major capsid protein [Human papillomavirus]				0.00517428	10.075	16398.4	28864503	1 (1 0 0 0 0)
envelope glycoprotein [Human immunodeficiency virus 1]				0.00492494	10.0746	51274.1	61106080	1 (1 0 0 0 0)
ubiquitin carboxyl-terminal esterase L1 (ubiquitin thiolesterase) [Hom				7.55978e-05	10.0745	24808.5	21361091	1 (1 0 0 0 0)
VE1_HPV15 Replication protein E1 (ATP-dependent helicase E1)				0.00223669	10.074	69621.5	549219	1 (1 0 0 0 0)
envelope glycoprotein [Human immunodeficiency virus 1]				0.00644994	10.0737	22216.1	45826765	2 (2 0 0 0 0)
gag protein [Human immunodeficiency virus 1]				0.0083498	10.0727	54823.9	55416337	3 (1 0 2 0 0)
SYN2_HUMAN Synapsin-2 (Synapsin II)				0.00404055	10.0723	62928.8	6686022	1 (1 0 0 0 0)
unnamed protein product [Homo sapiens]				0.000307424	10.0713	63225.6	34530319	1 (1 0 0 0 0)
pol protein [Human immunodeficiency virus 1]				0.00629609	10.0711	57106	42716792	1 (1 0 0 0 0)
polyprotein [Human coxsackievirus B5]				0.0029793	10.071	243277	58372546	1 (1 0 0 0 0)
immunoglobulin variable region [Homo sapiens]				2.87801e-05	10.0701	13203.5	1685225	1 (1 0 0 0 0)
transmembrane protein 88, isoform CRA_b [Homo sapiens]				0.00619982	10.0701	22870.6	119610531	1 (1 0 0 0 0)
retinitis pigmentosa 1 homolog [Mus musculus]				0.00715092	10.0693	234240	33468923	3 (0 0 0 2 1)
KIAA1267 protein [Homo sapiens]				0.00955507	10.0686	120908	6331206	3 (0 0 0 2 1)
immunoglobulin heavy chain VHDJ region [Homo sapiens]				0.00553787	10.0684	12361	21670021	1 (1 0 0 0 0)
gag protein [Human immunodeficiency virus 2]				0.00892559	10.0682	13459.7	3204225	1 (1 0 0 0 0)
Chain , Aldolase A (E.C.4.1.2.13)				0.0096932	10.0676	39264.3	229674	1 (1 0 0 0 0)
coiled-coil domain containing 89 [Homo sapiens]				0.00243496	10.0671	43781.6	22749429	3 (0 0 1 2 0)
hypothetical protein [Homo sapiens]				0.00952855	10.0669	12318.2	51476466	3 (2 0 0 1 0)
STX7_HUMAN Syntaxin-7				0.00123528	10.0667	29797.3	20532414	1 (1 0 0 0 0)
envelope glycoprotein [Human immunodeficiency virus 1]				0.00162458	10.0665	13201	54660185	1 (1 0 0 0 0)
ATP synthase, H+ transporting, mitochondrial F1 complex, delta subunit				0.0058346	10.0658	17479.2	4502297	2 (2 0 0 0 0)
reverse transcriptase [Human immunodeficiency virus 1]				0.00315984	10.0655	27390.3	12666786	1 (1 0 0 0 0)
EPB41L3 protein [Homo sapiens]				0.00837078	10.0644	96454.3	13544009	1 (1 0 0 0 0)
E1B 19K [Human adenovirus E]				0.00342466	10.0641	19995	51527266	1 (1 0 0 0 0)
catenin, alpha 1 [Homo sapiens]				0.00701358	10.064	100009	55770844	3 (0 0 1 2 0)
ADT3_HUMAN ADP/ATP translocase 3 (Adenine nucleotide translocator 2) (ANT 3) (A				0.000210966	10.0638	32845.2	113463	1 (1 0 0 0 0)
SECIS binding protein 2 [Homo sapiens]				0.00358544	10.0634	30473.8	57209759	1 (1 0 0 0 0)
ribosomal protein L10a [Rattus norvegicus]				0.00456686	10.063	24815.5	13592009	1 (1 0 0 0 0)
envelope glycoprotein [Human immunodeficiency virus 1]				0.00331374	10.0628	20300.4	52695163	1 (1 0 0 0 0)
zinc finger and BTB domain containing 22 [Homo sapiens]				0.00859697	10.0619	65531.1	20070224	1 (1 0 0 0 0)
AFG3 ATPase family gene 3-like 2 [Homo sapiens]				0.00190782	10.0617	88428.2	5802970	1 (1 0 0 0 0)
alkyldihydroxyacetone phosphate synthase precursor [Homo sapiens]				0.0021498	10.0615	72865.9	4501993	1 (1 0 0 0 0)
chromatin modifying protein 4A [Homo sapiens]				0.00988265	10.0614	29785.3	40548422	1 (1 0 0 0 0)
basigin isoform 1 [Homo sapiens]				0.000901465	10.0612	42174.1	38372919	1 (1 0 0 0 0)
guanine nucleotide binding protein (G protein), gamma 3 subunit [Mus mu				0.000666667	10.0609	8299.16	6754022	1 (1 0 0 0 0)
serine hydroxymethyltransferase 2 (mitochondrial), isoform CRA_a [Homo				0.00489245	10.0608	27116.1	119617399	2 (1 0 1 0 0)
SUCB2_HUMAN Succinyl-CoA ligase [GDP-forming] beta-chain, mitochondrial precu				0.00686156	10.0608	46481.5	52788292	2 (0 1 0 0 1)
gp160 [Human immunodeficiency virus 1]				0.000159281	10.0608	99216.5	14041633	1 (1 0 0 0 0)
envelope glycoprotein [Human immunodeficiency virus 1]				0.0074119	10.0608	96708.3	54124766	1 (1 0 0 0 0)
unnamed protein product [Homo sapiens]				0.00428292	10.0607	18116.1	10438496	1 (1 0 0 0 0)
envelope glycoprotein [Human immunodeficiency virus type 1]				0.00180942	10.0598	10432.4	2108368	1 (1 0 0 0 0)
heat shock 70kDa protein 14 isoform 1 [Homo sapiens]				0.0027391	10.0593	54760.2	82880658	1 (1 0 0 0 0)
dendrin [Homo sapiens]				0.0044768	10.0592	69869.8	62079299	1 (1 0 0 0 0)
zinc finger 298 [Homo sapiens]				0.00673165	10.0589	169096	21617878	2 (0 1 0 0 1)
recombining binding protein suppressor of hairless isoform 3 [Homo sap				0.00719248	10.0588	54110.9	42560225	1 (1 0 0 0 0)
envelope glycoprotein [Human immunodeficiency virus type 1]				0.00286625	10.0577	22400.1	2290130	1 (1 0 0 0 0)
polyprotein [Human rhinovirus 78]				0.00792567	10.0577	51812.2	39655155	2 (0 0 1 1 0)
immunoglobulin heavy chain CDR3 [Homo sapiens] [MAS				0.00990549	10.0567	12527	46811763	1 (1 0 0 0 0)
KIAA1734 protein [Homo sapiens]				0.00219291	10.0565	143387	12698013	1 (1 0 0 0 0)
circulating B cell antibody heavy chain variable region [Homo sapiens]				0.00442082	10.0563	12926.3	106898156	2 (1 0 0 0 1)
G protein-coupled receptor 89B [Homo sapiens]				0.00598591	10.0563	52882	7706704	1 (1 0 0 0 0)
envelope glycoprotein [Human immunodeficiency virus 1]				0.00435742	10.0559	26280.1	108736530	1 (1 0 0 0 0)
immunoglobulin alpha heavy chain variable region [Homo sapiens]				0.00856807	10.0559	11933.5	13378194	1 (1 0 0 0 0)
AF155803_1 DEAD-box corepressor DP103 [Homo sapiens]				0.000482008	10.0553	92162.5	14209614	1 (1 0 0 0 0)
sorting nexin 1 isoform a [Homo sapiens]				0.0032102	10.0553	59033.2	23111034	1 (1 0 0 0 0)
IRS-1 PH domain binding protein PHIP variant 9 [Homo sapiens]				0.000239824	10.0545	98646.4	12007334	1 (1 0 0 0 0)
unnamed protein product [Homo sapiens]				0.00547251	10.0541	90297.1	10434406	1 (1 0 0 0 0)
growth associated protein 43 [Homo sapiens]				0.0082004	10.0541	24787.9	4503911	1 (1 0 0 0 0)
protein O-fucosyltransferase 2 isoform A [Homo sapiens]				0.00357105	10.0527	48864.8	13273311	1 (1 0 0 0 0)
glycosyltransferase 8 domain containing 1 [Homo sapiens]				0.00330669	10.0527	41909	8923855	1 (1 0 0 0 0)
immunoglobulin heavy chain variable region [Homo sapiens]				0.00170144	10.0522	14419.1	39939601	2 (2 0 0 0 0)
LEM domain containing 2 [Homo sapiens]				0.00124814	10.0511	56939.6	31044432	1 (1 0 0 0 0)
angiopoietin-like 3 precursor [Homo sapiens]				0.00960611	10.0504	53604.2	7656888	1 (1 0 0 0 0)
envelope glycoprotein [Human immunodeficiency virus type 1]				0.000951977	10.0488	13479.1	8071760	1 (1 0 0 0 0)
membrane associated guanylate kinase, WW and PDZ domain containing 2 [				0.00266116	10.0477	158655	27436957	1 (1 0 0 0 0)
gp120 protein [Human immunodeficiency virus 1] [MA				0.00750392	10.0469	19238.6	34786362	1 (1 0 0 0 0)
unnamed protein product [Homo sapiens]				0.0028726	10.0462	24982.8	34529889	1 (1 0 0 0 0)
G [Human respiratory syncytial virus]				0.000300001	10.0462	32848.2	584042	1 (1 0 0 0 0)
HSP70-HOM [Homo sapiens]				0.0010819	10.0461	70361.4	4529894	1 (1 0 0 0 0)
gag protein [Human immunodeficiency virus type 1] [				0.00354865	10.0459	14605.4	14573071	2 (0 0 1 1 0)
hypothetical protein [Homo sapiens]				0.0068331	10.0459	88487	21740291	1 (1 0 0 0 0)
gag protein [Human immunodeficiency virus type 1] [				0.00279409	10.0442	14293.5	19423591	3 (2 0 1 0 0)
dopachrome tautomerase				0.00521002	10.0413	11087.4	1050251	1 (1 0 0 0 0)
gp160 [Human immunodeficiency virus 1]				0.00208888	10.0383	96488.6	18996232	1 (1 0 0 0 0)
exosome component 9 isoform 1 [Homo sapiens]				0.00484504	10.0347	50771.1	77812672	1 (1 0 0 0 0)
hypothetical protein [Homo sapiens]				0.00150694	10.0301	112604	5262601	2 (1 0 0 0 1)
gag protein [Human immunodeficiency virus 1]				0.0023218	8.18342	55119.2	90812182	2 (0 2 0 0 0)
unnamed protein product [Homo sapiens]				0.00571876	8.15669	55559.6	10438086	3 (1 2 0 0 0)
Gag [Human immunodeficiency virus 1]				0.00323389	8.14161	55827.4	119507370	4 (0 4 0 0 0)
B Chain B, Crystal Structure Of Human Hemoglobin E At 1.73 A Resolution				0.000609756	8.14117	15856.3	46014946	1 (0 1 0 0 0)
S31503 H+/K+-exchanging ATPase (EC 3.6.3.10) ATP1AL1 - human (fragment)				0.00208279	8.13766	10485.2	346261	4 (1 2 0 1 0)
unnamed protein product [Homo sapiens]				0.00555536	8.13647	50621.8	10435466	3 (1 1 0 1 0)
S-phase kinase-associated protein 1A isoform b [Homo sapiens]				0.00533435	8.13202	18646.2	25777713	1 (0 1 0 0 0)
hypothetical protein [Human calicivirus Hu/NLV/Queen's Arms/Leeds/92/UK				0.00267569	8.12601	22089.1	14330431	2 (0 2 0 0 0)
unnamed protein product [Homo sapiens]				0.000112865	8.12059	40160.7	21757106	2 (0 1 1 0 0)
hypothetical protein LOC345651 [Homo sapiens]				0.00037917	8.1176	41976	63055057	2 (0 2 0 0 0)
hypothetical protein DDBDRAFT_0167566 [Dictyostelium discoideum AX4]				0.00199426	8.11622	50433	66821635	3 (0 1 2 0 0)
AF166179_1 polyprotein [Human coxsackievirus A9] [MAS				0.00465348	8.1139	14925.1	6752481	2 (0 1 1 0 0)
gag protein [Human immunodeficiency virus 1]				0.00166026	8.11264	52119.5	124299488	1 (0 1 0 0 0)
lipin 3 [Homo sapiens]				0.00268116	8.10996	93556.5	74271888	3 (0 2 0 0 1)
Na,K-ATPase catalytic subunit alpha-A protein [Homo sapiens]				0.00102957	8.10946	3563.7	5919228	1 (0 1 0 0 0)
immunoglobulin alpha heavy chain variable region [Homo sapiens]				0.00503942	8.10581	14011.9	62871218	3 (2 1 0 0 0)
FABP7 [Homo sapiens]				0.00640683	8.10345	14907.5	48146231	4 (2 1 0 1 0)
KIAA1376 protein [Homo sapiens]				0.00947397	8.10326	49219.9	7243133	2 (0 0 1 0 1)
UL120 [Human herpesvirus 5 strain Merlin]				0.00930329	8.10256	23119.5	52139284	1 (0 1 0 0 0)
envelope glycoprotein [Human immunodeficiency virus type 1]				0.00266476	8.09986	12969.5	1835549	2 (0 0 0 2 0)
gp120 [Human immunodeficiency virus 1]				0.00452758	8.09843	9776.11	9968017	1 (0 1 0 0 0)
neural proliferation, differentiation and control, 1 [Homo sapiens] [MA				0.00161383	8.09652	42723.5	55962688	1 (0 1 0 0 0)
prestin isoform a [Homo sapiens]				0.00721784	8.09615	81211.8	39752683	1 (0 1 0 0 0)
epimorphin [Homo sapiens]				0.000684631	8.0959	34621.8	303605	1 (0 1 0 0 0)
KIAA0546 protein [Homo sapiens]				0.00456815	8.09544	218194	29421174	2 (0 0 1 0 1)
collapsin response mediator protein 1 isoform 2 [Homo sapiens]				0.00876759	8.09527	62144.8	4503051	3 (1 2 0 0 0)
UTRO_HUMAN Utrophin (Dystrophin-related protein 1) (DRP1) (DRP)				0.000208793	8.09349	394247	1174915	2 (0 0 0 2 0)
cerebral protein-12 [Homo sapiens]				0.0056197	8.09215	91105.2	13874433	1 (0 1 0 0 0)
Ig light chain [Homo sapiens]				0.00102962	8.09208	13057.4	2738303	1 (0 1 0 0 0)
similar to NM_031954 MSTP028 protein in Homo sapiens [Schistosoma japoni				0.00145917	8.09157	38879.5	29840923	2 (0 1 1 0 0)
unnamed protein product [Homo sapiens]				0.000104194	8.09062	18229.3	21756953	1 (0 1 0 0 0)
MLL3_HUMAN Myeloid/lymphoid or mixed-lineage leukemia protein 3 homolog (Hist				0.0028121	8.09028	540966	37999866	1 (0 1 0 0 0)
small nuclear RNA activating complex, polypeptide 4, 190kDa [Homo sapi				0.00913426	8.08702	159335	92859678	4 (2 2 0 0 0)
L1 protein [Human papillomavirus type 75]				0.00470917	8.08626	57220.6	2911550	1 (0 1 0 0 0)
endothelin-converting enzyme, isoform ECE-1a [Homo sapiens]				0.000454275	8.08593	85753.9	1177448	2 (0 0 1 0 1)
complement component 7 precursor [Homo sapiens]				0.000147717	8.08589	93457.3	45580688	1 (0 1 0 0 0)
reverse transcriptase [Human immunodeficiency virus 1]				0.000174452	8.0858	24550.7	71844956	1 (0 1 0 0 0)
envelope glycoprotein [Human immunodeficiency virus type 1]				0.00557023	8.0847	10085.3	9887298	2 (0 1 1 0 0)
unnamed protein product [Homo sapiens]				0.00334937	8.07952	23535.8	34534054	1 (0 1 0 0 0)
gp120 [Human immunodeficiency virus type 1]				0.00417208	8.07944	23993.1	4071156	1 (0 1 0 0 0)
envelope glycoprotein [Human immunodeficiency virus 1]				0.00173322	8.0789	45944.9	51832545	1 (0 1 0 0 0)
similar to BC001656 unknown (protein for MGC:2615) in Homo sapiens [Schi				0.00230256	8.07865	27571.6	29841268	1 (0 1 0 0 0)
hCG1650665 [Homo sapiens]				0.00857485	8.07743	24717.9	119584730	1 (0 1 0 0 0)
ras homolog gene family, member B [Homo sapiens]				0.00873798	8.07521	22109.1	4757764	1 (0 1 0 0 0)
AF344773_1 vpu protein [Human immunodeficiency virus type 1]				0.00940208	8.07469	9297.12	13487595	1 (0 1 0 0 0)
envelope glycoprotein [Human immunodeficiency virus 1]				0.00385454	8.074	96370.3	83854089	1 (0 1 0 0 0)
envelope glycoprotein [Human immunodeficiency virus 1]				0.00644994	8.07367	22429.2	45826769	2 (0 2 0 0 0)
hCG2042088 [Homo sapiens]				0.00655711	8.07271	13788	119584841	1 (0 1 0 0 0)
DR4 [Human herpesvirus 6A]				0.00883707	8.07241	10554.5	9628295	1 (0 1 0 0 0)
AF361879_8 envelope glycoprotein [Human immunodeficiency virus type 1] [M				0.0015106	8.0681	97370.6	15281506	2 (0 0 1 0 1)
VE1_HPV17 Replication protein E1 (ATP-dependent helicase E1)				0.00793793	8.06784	70433.1	549220	2 (0 0 1 0 1)
beta globin chain variant [Homo sapiens]				0.00266818	8.06769	15987.3	26892090	2 (0 1 0 1 0)
mutant desmin [Homo sapiens]				0.00893222	8.06722	53502.3	3411134	1 (0 1 0 0 0)
gag protein [Human immunodeficiency virus 1]				0.00662549	8.06629	14815.6	80975372	1 (0 1 0 0 0)
envelope glycoprotein; gp120 [Human immunodeficiency virus 1]				0.00489027	8.06619	22382	18535994	1 (0 1 0 0 0)
envelope glycoprotein [Human immunodeficiency virus type 1]				0.00833812	8.06461	96794.6	17046599	1 (0 1 0 0 0)
junctional adhesion molecule 3 precursor [Homo sapiens]				0.00990912	8.06451	39577.3	21361905	1 (0 1 0 0 0)
VL1_HPV27 Major capsid protein L1				0.00172166	8.06419	67055.2	549338	1 (0 1 0 0 0)
capsid protein VP1 [Human echovirus 12]				0.00675401	8.06132	15841.9	9716544	1 (0 1 0 0 0)
envelope protein [Human immunodeficiency virus 1]				0.00890067	8.05989	95064.9	11124719	1 (0 1 0 0 0)
envelope glycoprotein [Human immunodeficiency virus type 1]				0.00148004	8.05978	7423.05	2585386	1 (0 1 0 0 0)
envelope polyprotein [Human immunodeficiency virus type 1]				0.0074119	8.05954	95644.3	2570309	1 (0 1 0 0 0)
CGI58 protein [Homo sapiens]				0.000601879	8.05938	39070.7	31542303	2 (0 0 0 2 0)
zinc finger, CW type with coiled-coil domain 2 isoform a [Homo sapien				0.00377773	8.05913	106281	145553976	1 (0 1 0 0 0)
T cell receptor delta chain [Homo sapiens]				0.00141299	8.05849	2667.24	2853699	1 (0 1 0 0 0)
muscleblind-like 2 isoform 1 [Homo sapiens]				0.00273766	8.05847	39308.9	21464125	1 (0 1 0 0 0)
AF484508_7 truncated envelope glycoprotein [Human immunodeficiency virus				0.00633544	8.0584	9647.93	25166937	1 (0 1 0 0 0)
AF305429_1 apolipoprotein L2 [Homo sapiens]				0.00805084	8.05702	37055.4	15824473	1 (0 1 0 0 0)
C protein [Human parainfluenza virus 3]				0.00704122	8.0568	23391.5	19551239	1 (0 1 0 0 0)
Functional ortholog of human PIG-V, which is a mannosyltransferase that				0.00596532	8.05401	50739.8	6319476	1 (0 1 0 0 0)
envelope glycoprotein [Human immunodeficiency virus type 1]				0.0042285	8.05387	45530	2290140	1 (0 1 0 0 0)
CU090_HUMAN Uncharacterized protein C21orf90				0.00273035	8.0531	7092.64	25089983	2 (0 0 0 2 0)
olfactory receptor, family 5, subfamily M, member 1 [Homo sapiens]				0.000983297	8.05295	35584.2	52317124	1 (0 1 0 0 0)
serine/threonine protein kinase [Homo sapiens]				0.00752973	8.05285	52972.1	599827	1 (0 1 0 0 0)
KIAA1266 protein [Homo sapiens]				0.00382215	8.0523	68333.6	6331199	2 (0 0 0 2 0)
human HCF1 related family member (hcf-1) [Caenorhabditis elegans]				0.00868478	8.05185	87304.9	17539228	1 (0 1 0 0 0)
VP1 capsid protein [Human echovirus 11]				0.0051237	8.05006	21352.6	111036322	1 (0 1 0 0 0)
ribonuclease, RNase A family, 10 (non-active) [Homo sapiens]				0.00110551	8.04964	23992.8	61175227	1 (0 1 0 0 0)
Rho GTPase activating protein [Homo sapiens]				0.00497872	8.04784	24988	25396407	1 (0 1 0 0 0)
BAI1-associated protein 1 [Homo sapiens]				0.00266116	8.04771	136896	3370998	1 (0 1 0 0 0)
attachment protein [Human respiratory syncytial virus]				0.000300001	8.04619	32614	3641268	1 (0 1 0 0 0)
hCG1651398 [Homo sapiens]				0.00473095	8.04384	14505.2	119608945	1 (0 1 0 0 0)
envelope glycoprotein [Human immunodeficiency virus 1]				0.00288254	8.04174	12656.4	57545188	1 (0 1 0 0 0)
AF484484_1 rev protein [Human immunodeficiency virus 1]				0.0055516	8.0394	14042.5	25166699	1 (0 1 0 0 0)
VE1_HPV14 Replication protein E1 (ATP-dependent helicase E1)				0.00649803	6.14281	69258.1	549218	2 (1 0 1 0 0)
actin-like protein [Homo sapiens]				1.78574e-07	6.08847	11528.9	62421162	3 (0 1 1 1 0)
nebulette sarcomeric isoform [Homo sapiens]				0.00371483	6.0802	116380	5453758	3 (0 0 1 1 1)
hypothetical protein [Homo sapiens]				0.00712693	6.07379	125009	60219476	3 (1 0 0 1 1)
human BACH helicase related family member (bch-1) [Caenorhabditis eleg				0.00960817	6.06776	112873	17506821	2 (0 0 0 1 1)
beclin 1 (coiled-coil, myosin-like BCL2 interacting protein), isoform C				0.00791216	6.04957	16241.3	119581292	2 (0 0 0 1 1)
musashi 2 isoform b [Homo sapiens]				0.000903156	6.04538	28402	25121993	2 (0 0 0 1 1)
unnamed protein product [Homo sapiens]				0.00418782	6.03702	127878	10436735	2 (0 0 0 1 1)
AF391861_1 VP1 [Human echovirus 30]				0.00927126	4.08985	15920.8	20530360	2 (0 1 0 1 0)
A-kinase anchor protein 11 [Homo sapiens]				0.00383174	4.07885	210379	7706457	2 (0 0 0 0 2)
ADIP_HUMAN Afadin- and alpha-actinin-binding protein (ADIP) (Afadin DIL domai				0.00117922	4.06483	71191.5	54035738	2 (0 0 0 0 2)
hCG2045706 [Homo sapiens]				0.00765181	4.06187	5849.83	119622608	2 (1 0 0 1 0)
unnamed protein product [Homo sapiens]				0.00444926	4.04729	88408.1	22760637	2 (0 0 0 0 2)
ribosomal protein L7-like 1 [Homo sapiens]				0.00333122	4.04155	28643.1	50053872	2 (0 0 0 0 2)
RM09_HUMAN 39S ribosomal protein L9, mitochondrial precursor (L9mt) (MRP-L9)				0.00979754	4.03849	30166.4	17865554	3 (1 0 0 0 2)
U67 [Human herpesvirus 7]				0.000892852	2.11843	38717.1	51874289	3 (1 0 0 1 1)
similar to t-complex 1; T-complex locus TCP-1; t-complex 1 (a murine tcp				0.00639146	2.07632	19812.7	51094756	4 (0 3 0 0 1)

## Sheet: CADASIL_2_RIPA
Description	P-value	Score	MW	Accession	Peptide (Hits)
ATP synthase, H+ transporting, mitochondrial F1 complex, alpha subunit	1.38645e-11	80.1982	59713.7	4757810	8 (8 0 0 0 0)
tubulin, beta 4 [Homo sapiens]	7.63249e-07	78.2302	49553.9	21361322	16 (12 3 1 0 0)
2',3'-cyclic-nucleotide 3'-phosphodiesterase (EC 3.1.4.37)	7.51595e-10	66.2843	45070.4	180687	10 (9 0 1 0 0)
myelin basic protein isoform 1 [Homo sapiens]	1.53795e-06	64.1871	21480	68509930	18 (14 2 1 1 0)
Na+/K+ -ATPase alpha 1 subunit isoform a proprotein [Homo sapiens]	2.50632e-07	60.1685	112824	21361181	7 (5 1 0 0 1)
Na+/K+ -ATPase alpha 2 subunit proprotein [Homo sapiens]	2.59746e-07	60.1334	112194	4502271	11 (11 0 0 0 0)
neurofilament, light polypeptide 68kDa [Homo sapiens]	4.16571e-06	58.1876	61479.3	105990539	6 (5 1 0 0 0)
Na+/K+ -ATPase beta 1 subunit isoform a [Homo sapiens]	3.67951e-05	58.1483	35038.9	4502277	10 (9 1 0 0 0)
unnamed protein product [Homo sapiens]	1.03045e-06	58.1291	57919.5	28940	7 (6 1 0 0 0)
tubulin alpha 6 [Homo sapiens]	8.60583e-07	56.2191	49863.5	14389309	11 (7 1 2 1 0)
neurofilament, medium polypeptide 150kDa [Homo sapiens]	1.15225e-08	52.1978	102386	4885513	9 (8 0 0 0 1)
Na+,K+ ATPase [Homo sapiens]	5.16738e-08	48.1638	111901	1359715	9 (8 1 0 0 0)
tubulin, beta, 4 [Homo sapiens]	5.53896e-08	46.1391	50400.3	50592996	9 (1 4 4 0 0)
SPTAN1 protein [Homo sapiens]	0.00376776	44.0721	282106	31565122	5 (2 3 0 0 0)
GNAO2_HUMAN Guanine nucleotide-binding protein G(o) subunit alpha 2	3.69898e-06	42.1529	40061.1	60416433	8 (7 0 0 0 1)
glyceraldehyde-3-phosphate dehydrogenase [Homo sapiens]	4.83147e-11	40.2321	36030.4	7669492	7 (7 0 0 0 0)
proteolipid protein [Rattus norvegicus]	3.97269e-07	40.1951	30057.1	13591880	24 (19 2 2 0 1)
dihydropyrimidinase-like 2 [Homo sapiens]	1.64723e-07	40.1568	62254.7	4503377	9 (8 0 1 0 0)
A Chain A, Crystal Structure Of A DictyosteliumTETRAHYMENA CHIMERA Actin (Mutan	1.69154e-10	38.2151	41719.9	7245526	8 (6 2 0 0 0)
enolase 2 [Homo sapiens]	0.000117856	38.1275	47239.1	5803011	4 (3 1 0 0 0)
ATRB actin, skeletal muscle - rabbit	0.000522719	36.2292	41789.8	71611	9 (7 2 0 0 0)
unknown [Homo sapiens]	1.94238e-10	36.223	268547	62988842	5 (3 0 0 1 1)
syntaxin binding protein 1 isoform a [Homo sapiens]	1.49942e-07	36.147	68692.3	4507297	5 (4 0 1 0 0)
synaptotagmin I [Homo sapiens]	0.000105648	32.1668	47542.8	5032139	4 (3 0 0 0 1)
AT2B4_HUMAN Plasma membrane calcium-transporting ATPase 4 (PMCA4) (Plasma mem	0.000595355	32.1231	137833	14286105	4 (2 1 0 1 0)
brain creatine kinase [Homo sapiens]	1.39206e-07	30.2221	42617.4	21536286	5 (5 0 0 0 0)
Chain , Cdc42 From Human, Nmr, 20 Structures	0.000285374	30.1648	21473.2	2624582	3 (3 0 0 0 0)
tubulin, alpha 1B [Mus musculus]	6.92793e-05	30.1396	50119.6	34740335	4 (4 0 0 0 0)
Chain , Aldolase A (E.C.4.1.2.13)	0.000106214	30.1271	39264.3	229674	3 (3 0 0 0 0)
glial fibrillary acidic protein [Homo sapiens]	5.06773e-05	30.1069	49849.7	4503979	4 (3 0 1 0 0)
MDHM_HUMAN Malate dehydrogenase, mitochondrial precursor	1.54693e-09	28.2468	35508.8	6648067	4 (3 1 0 0 0)
polyprotein [Human coxsackievirus A11]	0.00666679	28.061	246172	33304553	4 (1 1 1 1 0)
integrin alpha M precursor [Homo sapiens]	0.000509855	26.0872	127099	88501734	3 (2 0 1 0 0)
SH3-domain GRB2-like 2 [Homo sapiens]	3.09127e-06	26.086	39937.1	4506931	4 (2 0 2 0 0)
KIAA0856 protein [Homo sapiens]	0.00952452	26.0665	250097	20521676	4 (1 1 1 0 1)
p532 [Homo sapiens]	0.0073231	26.0595	531849	1477565	5 (0 2 0 2 1)
KIAA0460 protein [Homo sapiens]	0.00168272	24.0783	155278	20521059	3 (2 0 0 1 0)
visinin-like 1 [Mus musculus]	1.7332e-08	22.1891	22128	6755983	5 (4 0 0 0 1)
A-kinase anchor protein 9 isoform 2 [Homo sapiens]	0.00535703	22.0663	452707	22538387	3 (2 0 0 0 1)
KIAA1125 protein [Homo sapiens]	0.00783209	22.0513	133697	6329749	4 (1 0 2 1 0)
A Chain A, Crystal Structure Of Caenorhabditis Elegans Mg-Atp Actin Complexed	2.28433e-09	20.284	41637.7	14278147	2 (2 0 0 0 0)
tubulin polymerization promoting protein [Homo sapiens]	5.5481e-09	20.1952	23679.2	5902018	2 (2 0 0 0 0)
A Chain A, Crystal Structure Of Human Cd81 Extracellular Domain, A Receptor Fo	4.1716e-06	20.1795	9898.87	13399775	2 (2 0 0 0 0)
solute carrier family 25 (mitochondrial carrier; adenine nucleotide tr	3.65621e-07	20.1343	33043.2	55749577	3 (3 0 0 0 0)
syntaxin 1A (brain) [Homo sapiens]	0.000100304	20.1163	33002.7	4759182	2 (2 0 0 0 0)
heavy neurofilament subunit [Homo sapiens]	8.55388e-05	20.1071	111713	1841430	3 (3 0 0 0 0)
gelsolin isoform a precursor [Homo sapiens]	0.000162333	20.1007	85644.2	4504165	3 (3 0 0 0 0)
brain abundant, membrane attached signal protein 1 [Homo sapiens]	0.00223934	20.0992	22680	30795231	3 (3 0 0 0 0)
zinc finger protein, multitype 2 [Homo sapiens]	0.0098153	20.0631	128061	6912370	2 (2 0 0 0 0)
large tegument protein [Human herpesvirus 6B]	0.00276609	20.0595	240059	4996019	5 (1 0 1 2 1)
hypothetical protein LOC555788 [Danio rerio]	0.00353559	20.0525	117756	71834354	2 (2 0 0 0 0)
crystallin, alpha B [Homo sapiens]	0.00036419	18.1593	20146.4	4503057	4 (3 1 0 0 0)
KIAA0968 protein [Homo sapiens]	6.00844e-06	18.1183	58985.2	4589580	2 (1 1 0 0 0)
PYRIN-containing APAF1-like protein 7 isoform 2 [Homo sapiens]	0.00819796	18.1063	120095	21955154	2 (1 1 0 0 0)
UDP glycosyltransferase 3 family, polypeptide A1 [Homo sapiens]	0.00639832	18.1013	59113	46250396	2 (1 1 0 0 0)
synaptophysin [Homo sapiens]	0.00080789	18.0925	32083.5	899301	2 (1 1 0 0 0)
matrix metalloproteinase 12 preproprotein [Homo sapiens]	0.0099785	18.0582	53967.2	73858572	6 (3 3 0 0 0)
DHPR_HUMAN Dihydropteridine reductase (HDHPR) (Quinoid dihydropteridine redu	0.00430336	18.0565	25773	118572639	4 (2 0 1 0 1)
unnamed protein product [Homo sapiens]	0.0025358	18.0561	23528.6	21749196	2 (1 1 0 0 0)
unnamed protein product [Homo sapiens]	3.31801e-09	16.1812	49811	10433717	7 (2 2 2 1 0)
hypothetical protein [Homo sapiens]	0.00224472	16.1291	110722	52545742	2 (1 0 1 0 0)
ubiquitin-activating enzyme E1 [Homo sapiens]	0.00569223	16.1053	117774	23510338	2 (1 0 1 0 0)
DHSA_HUMAN Succinate dehydrogenase [ubiquinone] flavoprotein subunit, mitochon	3.86284e-05	16.097	72645.4	1169337	2 (1 0 1 0 0)
N Chain N, Mutant Monomer Of Recombinant Human Hexokinase Type I Complexed With	4.42547e-05	16.0923	102383	7245424	2 (1 0 1 0 0)
collapsin response mediator protein 1 isoform 2 [Homo sapiens]	1.90513e-05	16.0917	62144.8	4503051	4 (3 0 1 0 0)
DPYL4_HUMAN Dihydropyrimidinase-related protein 4 (DRP-4) (Collapsin response	1.90513e-05	16.0876	61838.5	68067941	3 (0 3 0 0 0)
alpha-spectrin [Homo sapiens]	0.00763101	16.0716	43790.8	829111	2 (1 0 1 0 0)
F-box only protein 30 [Homo sapiens]	0.000202058	16.0597	82250.9	34577055	3 (0 1 1 0 1)
ras homolog gene family, member T1 isoform 1 [Homo sapiens]	0.00809694	16.0482	79496.4	75750480	2 (1 0 1 0 0)
tubulin, beta, 2 [Homo sapiens]	3.31801e-09	14.1923	49799	5174735	7 (2 2 2 0 1)
prosaposin isoform a preproprotein [Homo sapiens]	2.29747e-06	14.1585	58073.9	11386147	2 (1 0 0 1 0)
kelch-like 17 [Homo sapiens]	0.00472157	14.0838	69830.2	38194229	2 (0 1 1 0 0)
hypothetical protein LOC345651 [Homo sapiens]	0.00903754	14.0801	41976	63055057	2 (0 1 1 0 0)
CENPF_HUMAN Centromere protein F (Kinetochore protein CENP-F) (Mitosin) (AH an	0.0086734	14.0653	367366	1345731	2 (0 1 1 0 0)
human Ku70 autoantigen homologue [Xenopus laevis] [	0.00313002	14.0577	69234.8	4630797	2 (1 0 0 1 0)
PDE4D protein [Homo sapiens]	0.00108584	14.0516	24413.4	14249999	5 (2 1 1 1 0)
CF118_HUMAN Uncharacterized protein C6orf118	0.00386377	14.0499	53738.1	71152375	2 (1 0 0 1 0)
hypothetical protein [Homo sapiens]	0.00106199	14.0447	143799	21739606	2 (1 0 0 1 0)
synaptonemal complex lateral element protein [Homo sapiens]	0.00551856	14.0438	175601	3256191	2 (0 1 1 0 0)
KIAA1058 protein [Homo sapiens]	0.00128513	12.1137	239264	20521746	2 (1 0 0 0 1)
lipin 3 [Homo sapiens]	0.00223322	12.0946	93556.5	74271888	2 (0 1 0 1 0)
similar to t-complex 1; T-complex locus TCP-1; t-complex 1 (a murine tcp	0.000958097	12.0905	19812.7	51094756	8 (3 1 1 2 1)
heat shock 70kDa protein 9B precursor [Homo sapiens]	0.00382522	12.0868	73634.8	24234688	2 (1 0 0 0 1)
KIAA1632 protein [Homo sapiens]	0.000381608	12.0493	165103	10047341	2 (1 0 0 0 1)
myelin oligodendrocyte glycoprotein [Homo sapiens] [M	4.46344e-07	10.2184	28175	793839	2 (2 0 0 0 0)
tubulin, alpha 1a [Mus musculus]	1.43452e-07	10.2165	49927.7	6678465	1 (1 0 0 0 0)
histone H2A [Homo sapiens]	7.56217e-09	10.2033	13986.8	28195394	2 (2 0 0 0 0)
CD9 antigen [Homo sapiens]	5.01155e-12	10.1846	25399	4502693	1 (1 0 0 0 0)
S100 calcium-binding protein, beta [Homo sapiens]	5.00454e-06	10.1758	10706	5454034	1 (1 0 0 0 0)
nef protein [Human immunodeficiency virus type 1] [M	0.0023618	10.1642	23532.7	3549007	1 (1 0 0 0 0)
SHPS1_HUMAN Tyrosine-protein phosphatase non-receptor type substrate 1 precur	1.7922e-05	10.1592	54778.7	29427656	2 (2 0 0 0 0)
guanine nucleotide-binding protein, beta-1 subunit [Mus musculus]	0.00340544	10.1424	37353	6680045	2 (2 0 0 0 0)
cytochrome c oxidase subunit VIIa polypeptide 2 (liver) precursor [Homo	1.40506e-05	10.142	9390.1	4502989	1 (1 0 0 0 0)
OR1E1_HUMAN Olfactory receptor 1E1 (Olfactory receptor OR17-18) (Olfactory rece	0.00920546	10.1318	35240.1	400671	2 (0 1 0 0 1)
Nogo-A protein [Homo sapiens]	4.75596e-05	10.1294	129861	9408096	2 (2 0 0 0 0)
unnamed protein product [Homo sapiens]	0.000462543	10.1276	30614	22760872	2 (1 0 0 1 0)
cytochrome c-1 [Homo sapiens]	0.00148199	10.123	35367	21359867	1 (1 0 0 0 0)
guanine nucleotide-binding protein, beta-2 subunit [Mus musculus]	0.00224553	10.119	37307.1	13937391	1 (1 0 0 0 0)
immunoglobulin light chain variable region [Homo sapiens]	0.00595038	10.113	11695.8	66096638	4 (3 1 0 0 0)
histone H2B [Homo sapiens]	0.00012941	10.1129	13927.6	1568557	1 (1 0 0 0 0)
A Chain A, Cyclophilin A Complexed With Dipeptide Gly-Pro	1.49889e-06	10.1128	17869.8	1633054	1 (1 0 0 0 0)
Na+/K+ -ATPase alpha 3 subunit [Homo sapiens]	0.00592021	10.1122	111677	22748667	1 (1 0 0 0 0)
tubulin, beta 2 [Homo sapiens]	5.67873e-08	10.1116	49875	4507729	2 (2 0 0 0 0)
AF150075_1 envelope glycoprotein gp120 [Human immunodeficiency virus type	0.00889751	10.102	10829.7	5456881	1 (1 0 0 0 0)
hCG1795719 [Homo sapiens]	0.000938127	10.101	22906.8	119573243	1 (1 0 0 0 0)
unnamed protein product [Homo sapiens]	0.00885401	10.1003	19667.9	7020367	1 (1 0 0 0 0)
calmodulin [Homo sapiens]	0.000177956	10.0972	17152	825635	1 (1 0 0 0 0)
envelope glycoprotein [Human immunodeficiency virus 2]	0.0033094	10.0968	14495.3	59797405	1 (1 0 0 0 0)
anti-tetanus toxoid immunoglobulin light chain variable region [Homo sap	0.00139707	10.0966	11536.6	58222508	3 (1 0 0 2 0)
sodium channel modifier 1 [Homo sapiens]	0.000752871	10.0965	25933.2	13128998	2 (1 1 0 0 0)
similar to BC001656 unknown (protein for MGC:2615) in Homo sapiens [Schi	0.00378165	10.0964	27571.6	29841268	1 (1 0 0 0 0)
cell division cycle 10 [Bos taurus]	1.21009e-06	10.0961	48727.1	47564098	1 (1 0 0 0 0)
unnamed protein product [Homo sapiens]	0.00693699	10.0946	40160.7	21757106	2 (0 0 1 1 0)
G01650 malate dehydrogenase (EC 1.1.1.37), cytosolic - human [	0.000118346	10.0945	36392	7431153	1 (1 0 0 0 0)
vesicle-associated membrane protein 2 (synaptobrevin 2) [Homo sapiens]	0.00500321	10.0915	12640.7	7657675	1 (1 0 0 0 0)
immunoglobulin heavy chain variable region [Homo sapiens]	0.00348384	10.089	10921.4	112696794	2 (1 0 0 1 0)
immunoglobulin alpha heavy chain variable region [Homo sapiens]	0.00333119	10.0874	14011.9	62871218	5 (2 2 0 0 1)
peptidylprolyl isomerase A [Mus musculus]	0.00533929	10.0864	17959.8	6679439	1 (1 0 0 0 0)
U10 [Human herpesvirus 7]	0.00462345	10.0858	51639.7	51874233	2 (0 0 1 1 0)
Chain , Human Rhoa Complexed With Gtp Analogue	0.00704702	10.0854	20557.3	3318980	2 (2 0 0 0 0)
NADH dehydrogenase (ubiquinone) flavoprotein 1, 51kDa [Homo sapiens]	0.000161643	10.0849	50784.9	20149568	1 (1 0 0 0 0)
unnamed protein product [Homo sapiens]	0.000114962	10.084	36909.7	10434073	1 (1 0 0 0 0)
B Chain B, T-To-T(High) Quaternary Transitions In Human Hemoglobin: Deshis146b	0.000255496	10.0834	15720.2	61679604	1 (1 0 0 0 0)
5' nucleotidase, ecto [Homo sapiens]	0.00124796	10.0824	63327.6	4505467	3 (1 2 0 0 0)
guanine nucleotide binding protein, alpha activating polypeptide O [Ho	0.000447494	10.0822	40024.9	10567816	2 (2 0 0 0 0)
neuronal cell adhesion molecule [Homo sapiens]	0.00605145	10.08	130938	51095143	1 (1 0 0 0 0)
endothelin-converting enzyme, isoform ECE-1a [Homo sapiens]	0.000305032	10.0787	85753.9	1177448	1 (1 0 0 0 0)
MGA_HUMAN Maltase-glucoamylase, intestinal [Includes: Maltase (Alpha-glucosid	0.00260491	10.0773	209719	21431783	1 (1 0 0 0 0)
hCG1658588 [Homo sapiens]	0.00503109	10.0769	12586.6	119605801	1 (1 0 0 0 0)
A Chain A, Superoxide Dismutase (E.C.1.15.1.1)	0.00199478	10.0746	15908	515251	1 (1 0 0 0 0)
A Chain A, Human Prion Protein	5.59682e-05	10.0723	22876.6	6730485	1 (1 0 0 0 0)
STX1B_HUMAN Syntaxin-1B1 (Syntaxin 1B)	0.000261107	10.0722	33410.1	2501085	1 (1 0 0 0 0)
hypothetical protein [Homo sapiens]	0.000248399	10.0719	186746	51476196	1 (1 0 0 0 0)
carnitine palmitoyltransferase 1C, isoform CRA_h [Homo sapiens]	0.00206183	10.0711	7915.97	119572917	1 (1 0 0 0 0)
tubulin, beta 5 [Mus musculus]	4.94215e-05	10.071	49639	7106439	1 (1 0 0 0 0)
Thy-1 cell surface antigen [Homo sapiens]	7.56101e-06	10.0706	17923.3	19923362	1 (1 0 0 0 0)
unnamed protein product [Homo sapiens]	0.00304218	10.0701	50621.8	10435466	4 (2 0 2 0 0)
hypothetical protein LOC79091 [Homo sapiens]	0.00129069	10.0699	44458.4	94536786	1 (1 0 0 0 0)
immunoglobulin heavy chain variable region [Homo sapiens]	0.000522362	10.0692	13618.6	84683058	1 (1 0 0 0 0)
hCG41279 [Homo sapiens]	6.93951e-05	10.0685	17019.3	119623311	1 (1 0 0 0 0)
lanthionine synthetase C-like protein 1 [Homo sapiens]	2.6023e-06	10.0679	45253.6	5174445	1 (1 0 0 0 0)
unnamed protein product [Homo sapiens]	0.00292469	10.067	24399.8	10438905	1 (1 0 0 0 0)
KIAA0821 protein [Homo sapiens]	0.00019908	10.0666	172156	40788373	1 (1 0 0 0 0)
envelope glycoprotein [Human immunodeficiency virus 1]	0.0037302	10.0637	24677.4	62904647	2 (0 0 1 1 0)
unnamed protein product [Homo sapiens]	0.00663773	10.0636	26559.4	10433591	1 (1 0 0 0 0)
envelope glycoprotein [Human immunodeficiency virus 1]	0.000758072	10.0636	9613.99	145342697	1 (1 0 0 0 0)
phosphatidylinositol transfer protein membrane-associated 1 [Homo sapien	0.00314226	10.0635	134662	37993630	7 (3 0 3 0 1)
Vpu [Human immunodeficiency virus 1]	0.000837149	10.0629	9190.82	119507964	1 (1 0 0 0 0)
KIAA1297 protein [Homo sapiens]	2.30517e-05	10.0625	243340	7242949	1 (1 0 0 0 0)
calnexin precursor [Homo sapiens]	0.00030416	10.0611	67526	10716563	1 (1 0 0 0 0)
FK506-binding protein 2 precursor [Homo sapiens]	0.000544572	10.0602	15639.3	17149842	1 (1 0 0 0 0)
restin isoform a [Homo sapiens]	0.00769459	10.0593	160890	4506751	3 (1 1 1 0 0)
WAPAL protein [Homo sapiens]	0.0072694	10.0592	45531.9	16924240	1 (1 0 0 0 0)
mitogen-activated protein kinase 12 [Homo sapiens]	0.000300976	10.0591	41913.5	48255970	1 (1 0 0 0 0)
hypothetical protein [Homo sapiens]	2.08514e-05	10.059	47898.4	6807864	1 (1 0 0 0 0)
choline dehydrogenase [Homo sapiens]	0.00213879	10.0589	65360.3	27501456	1 (1 0 0 0 0)
N-acetyltransferase 11 [Homo sapiens]	0.00598775	10.0587	27206.1	13376119	1 (1 0 0 0 0)
KIAA1727 protein [Homo sapiens]	0.00441545	10.0581	123188	12697999	1 (1 0 0 0 0)
G02434 DNA-directed DNA polymerase (EC 2.7.7.7) epsilon catalytic chain A [validate	0.00763865	10.0581	261223	7428081	1 (1 0 0 0 0)
envelope glycoprotein [Human immunodeficiency virus 2]	0.00392549	10.0568	98850.3	94315235	1 (1 0 0 0 0)
immunoglobulin heavy chain variable region [Homo sapiens]	0.00560068	10.056	12954.1	54145431	2 (1 1 0 0 0)
transcription factor 12 isoform b [Homo sapiens]	0.0008209	10.0559	72920.3	4507391	1 (1 0 0 0 0)
chaperonin containing TCP1, subunit 6A isoform a [Homo sapiens]	0.00456298	10.0539	57987.7	4502643	1 (1 0 0 0 0)
toll-like receptor 5 [Homo sapiens]	0.00525867	10.0529	97737.4	16751843	2 (0 1 0 0 1)
immunoglobulin kappa light chain variable region [Homo sapiens]	0.00189501	10.0517	9071.43	71902385	1 (1 0 0 0 0)
envelope glycoprotein [Human immunodeficiency virus 1]	0.0075135	10.0517	36299	27762705	1 (1 0 0 0 0)
VP13B_HUMAN Vacuolar protein sorting-associated protein 13B (Cohen syndrome p	0.00973782	10.0481	448448	42558898	1 (1 0 0 0 0)
asparagine-linked glycosylation 5 [Homo sapiens]	0.00570409	10.0465	36922.4	7019323	1 (1 0 0 0 0)
hCG1746478 [Homo sapiens]	0.00673589	10.0462	8765.43	119597464	1 (1 0 0 0 0)
SR protein kinase (SRPK) involved in regulating proteins involved in mR	0.000840052	10.0462	83185.8	6323872	1 (1 0 0 0 0)
Xeroderma Pigmentosum Group E Complementing protein [Homo sapiens]	0.00723872	10.0452	126831	2632123	1 (1 0 0 0 0)
envelope glycoprotein [Human immunodeficiency virus 1]	0.00976746	10.045	28411.3	73334815	1 (1 0 0 0 0)
replicase polyprotein 1ab [Human coronavirus 229E]	0.00705881	10.0443	753677	12175747	2 (0 1 0 0 1)
unnamed protein product [Homo sapiens]	0.00756675	10.0435	154946	47077203	1 (1 0 0 0 0)
zinc finger protein 560 [Homo sapiens]	0.00535931	10.0412	91061.6	124517687	1 (1 0 0 0 0)
ATP/GTP binding protein-like 1 [Homo sapiens] [M	0.00800898	10.0408	120205	120444924	1 (1 0 0 0 0)
envelope glycoprotein [Human immunodeficiency virus 1]	0.00238959	10.0406	21604.5	30058856	1 (1 0 0 0 0)
AF484498_2 gag polyprotein precursor [Human immunodeficiency virus 1] [MA	0.0022695	10.0395	55400.4	25166832	1 (1 0 0 0 0)
RuvB-like 1 [Homo sapiens]	0.00413137	10.0382	50196.4	4506753	2 (0 1 0 0 1)
DNA packaging terminase subunit 1 [Human herpesvirus 3]	0.00614478	10.0376	82704	9625919	1 (1 0 0 0 0)
AACS protein [Homo sapiens]	0.00334385	8.14357	45607.8	71297231	2 (0 2 0 0 0)
AF470976_1 pol polyprotein [Human immunodeficiency virus type 1]	0.00158477	8.13638	41160.8	21686054	2 (0 2 0 0 0)
IgM, variable region, rheumatoid factor, autoantibody [Homo sapiens] [MAS	0.00294411	8.11697	12616.1	510394	1 (0 1 0 0 0)
envelope glycoprotein [Human immunodeficiency virus 1]	0.000632743	8.10693	19914.3	125395709	1 (0 1 0 0 0)
envelope glycoprotein [Human immunodeficiency virus type 1]	0.00889751	8.10193	8244.29	13774683	1 (0 1 0 0 0)
UL120 [Human herpesvirus 5 strain Merlin]	0.00449538	8.10014	23119.5	52139284	1 (0 1 0 0 0)
unnamed protein product [Homo sapiens]	0.00201578	8.09943	20185.4	21753982	1 (0 1 0 0 0)
pol protein [Human immunodeficiency virus 1]	0.00773056	8.09684	22058.9	34099332	1 (0 1 0 0 0)
hCG28318, isoform CRA_b [Homo sapiens]	0.00052102	8.09293	136608	119584546	1 (0 1 0 0 0)
pol protein [Human immunodeficiency virus 1]	0.000357336	8.08748	49304.4	109893504	1 (0 1 0 0 0)
hCG1794531, isoform CRA_a [Homo sapiens]	0.00142997	8.08356	6752.76	119570800	1 (0 1 0 0 0)
polyprotein [Human coxsackievirus A3]	0.00353642	8.0803	243137	40068431	1 (0 1 0 0 0)
SIX4_HUMAN Homeobox protein SIX4 (Sine oculis homeobox homolog 4)	0.0064211	8.07764	80782.6	12230612	1 (0 1 0 0 0)
DHX16_HUMAN Putative pre-mRNA-splicing factor ATP-dependent RNA helicase DHX1	0.00796813	8.07619	119190	26006959	2 (0 0 1 0 1)
A Chain A, Human Homogentisate Dioxygenase With Fe(Ii)	0.00678847	8.07282	52765.4	11514025	1 (0 1 0 0 0)
reverse transcriptase [Human immunodeficiency virus 1]	0.0086734	8.07169	32228.9	58532154	1 (0 1 0 0 0)
hCG1644040 [Homo sapiens]	0.00185735	8.06858	29664.5	119585027	2 (0 0 0 2 0)
solute carrier family 28 (sodium-coupled nucleoside transporter), membe	0.0082813	8.06514	71948.4	4759132	1 (0 1 0 0 0)
CX052_HUMAN Uncharacterized protein CXorf52 (SPCX)	0.00279847	8.06273	13799	73620724	1 (0 1 0 0 0)
leucine rich repeat containing 59 [Homo sapiens]	0.000222868	8.0619	34908.9	40254924	1 (0 1 0 0 0)
hCG1642151, isoform CRA_a [Homo sapiens]	0.00310626	8.06112	45262.2	119579662	2 (0 0 0 2 0)
OTU domain containing 7A [Homo sapiens]	0.00691579	8.0608	100615	18702331	1 (0 1 0 0 0)
protein-tyrosine phosphatase, PTPase {clone F36-15} [human, leukemia cell	2.2573e-05	8.05783	13999.7	300038	1 (0 1 0 0 0)
pol polyprotein [Human immunodeficiency virus type 1]	0.00506502	8.05494	40409.8	13739694	1 (0 1 0 0 0)
hypothetical protein HPV_s1gp1 [Human picobirnavirus]	0.00196125	8.05102	24918.5	66391745	1 (0 1 0 0 0)
unnamed protein product [Homo sapiens]	0.00692114	8.05097	70434.6	47077082	1 (0 1 0 0 0)
PH0269 epidermal autoantigen 450K (clone pE450-B) - human (fragment)	0.00208688	8.05092	30859	1082355	1 (0 1 0 0 0)
A45036 single-stranded-DNA-binding protein Pur alpha - human [MA	0.00020055	8.0507	34948.5	346338	1 (0 1 0 0 0)
hCG2040460 [Homo sapiens]	0.00940916	8.05012	8304.22	119621539	1 (0 1 0 0 0)
immunoglobulin alpha heavy chain variable region [Homo sapiens]	0.000748004	8.04949	10349	13378182	1 (0 1 0 0 0)
AF156838_1 pol polyprotein [Human immunodeficiency virus type 1]	0.00603857	8.04907	65784.7	8885960	1 (0 1 0 0 0)
envelope glycoprotein [Human immunodeficiency virus 1]	0.00314736	8.04874	96747.4	71725979	1 (0 1 0 0 0)
cyclin D2 [Homo sapiens]	0.00408087	8.0463	33045.8	4502617	1 (0 1 0 0 0)
sentrin/SUMO-specific protease 1 [Homo sapiens]	0.00950588	8.04435	73305.8	7657550	1 (0 1 0 0 0)
gag protein [Human immunodeficiency virus 1]	0.00990267	8.04389	54643.9	62997629	1 (0 1 0 0 0)
pericentriolar material 1, isoform CRA_a [Homo sapiens]	0.00970894	8.04002	228386	119584200	1 (0 1 0 0 0)
unnamed protein product [Homo sapiens]	0.00913484	8.03868	32782.2	16553829	2 (0 0 1 0 1)
transmembrane protein 84, isoform CRA_b [Homo sapiens]	0.00422179	8.03378	9662.09	119598240	1 (0 1 0 0 0)
adaptor-related protein complex 4, sigma 1 subunit [Danio rerio]	0.00718948	4.04974	16314.6	51468086	2 (0 0 0 0 2)
hypothetical protein [Homo sapiens]	0.00945276	2.07069	52016.4	34364772	5 (0 2 2 0 1)
RTP4_HUMAN Receptor-transporting protein 4 (28 kDa interferon-responsive prot	0.00303644	2.04141	27992.8	61252303	2 (1 0 0 0 1)
THUMP domain containing 3 [Homo sapiens]
vesicle-associated membrane protein 2 (synaptobrevin 2) [Homo sapiens]
A42177 KRAB-domain-containing zinc finger protein ZNF45 - human (fragment)
gag protein [Human immunodeficiency virus 1]
C Chain C, Crystal Structure Of Fibrinogen Fragment D
MTMR6_HUMAN Myotubularin-related protein 6
synaptotagmin I [Homo sapiens]
RUN and FYVE domain containing 3 isoform 1 [Homo sapiens]
AF166243_1 polyprotein [Human coxsackievirus A9]
DEAH (Asp-Glu-Ala-His) box polypeptide 40, isoform CRA_e [Homo sapiens]
peroxisome proliferator-activated receptor gamma, coactivator 1 beta [
SH3KBP1 binding protein 1 [Homo sapiens]
jerky homolog-like [Homo sapiens]
envelope glycoprotein [Human immunodeficiency virus type 1]
phosphatidylinositol-4-phosphate 5-kinase type II beta [Homo sapiens]
myelin oligodendrocyte glycoprotein [Homo sapiens] [M
unnamed protein product [Homo sapiens]
DMRT-like family B with proline-rich C-terminal, 1, isoform CRA_a [Homo
gp120 [Human immunodeficiency virus type 1]
KIAA0570 protein [Homo sapiens]
2,4-dienoyl CoA reductase 1 precursor [Homo sapiens]
mitochondrial glutamate carrier 1 [Homo sapiens]
guanylate binding protein 1, interferon-inducible, 67kDa, isoform CRA_b
bromodomain and WD repeat domain containing 2 [Homo sapiens]
unnamed protein product [Homo sapiens]
envelope glycoprotein [Human immunodeficiency virus 1]
hCG2040698 [Homo sapiens]
coronin, actin binding protein, 1A [Homo sapiens]
protease [Human immunodeficiency virus 1]
synaptosomal-associated protein 25 [Mus musculus]
VL1_HPV65 Major capsid protein L1
early endosome antigen 1, 162kD, isoform CRA_b [Homo sapiens]
tubulin, beta [Mus musculus]
AF144813_1 gag protein [Human immunodeficiency virus type 1]
envelope protein [Human immunodeficiency virus 1] [M
LAMA2_HUMAN Laminin subunit alpha-2 precursor (Laminin M chain) (Merosin heavy
oxygen regulated protein precursor [Homo sapiens]
reverse transcriptase [Human immunodeficiency virus 1]
reverse transcriptase [Human immunodeficiency virus 1]
envelope glycoprotein [Human immunodeficiency virus 1]
NG5 protein [Homo sapiens]
LRP16 protein [Homo sapiens]
protoporphyrinogen oxidase [Homo sapiens]
putative protein product of HMFT1638 [Homo sapiens]
solute carrier family 17, member 7 [Homo sapiens]
envelope glycoprotein [Human immunodeficiency virus 1]
LAMC1_HUMAN Laminin subunit gamma-1 precursor (Laminin B2 chain)
DDX20_HUMAN Probable ATP-dependent RNA helicase DDX20 (DEAD box protein 20) (
A30802 Ca2+-transporting ATPase (EC 3.6.3.8) 2, plasma membrane - human
NADH dehydrogenase (ubiquinone) Fe-S protein 6, 13kDa (NADH-coenzyme Q
envelope glycoprotein V3 [Human immunodeficiency virus 1]
I38080 replication licensing factor MCM5 - human
AF344773_1 vpu protein [Human immunodeficiency virus type 1]
hypothetical protein [Homo sapiens]
immunoglobulin heavy chain VHDJ region [Homo sapiens]
KIF6 protein [Homo sapiens]
gag protein [Human immunodeficiency virus 1]
immunoglobulin lambda light chain [Homo sapiens] [MA
hypothetical protein LOC51233, isoform CRA_b [Homo sapiens]
protease [Human immunodeficiency virus 1]
ubiquitin specific peptidase 38 [Homo sapiens]
envelope glycoprotein [Human immunodeficiency virus 1]
vpu protein [Human immunodeficiency virus 1]
gag protein [Human immunodeficiency virus 1]
AF075702_7 envelope glycoprotein [Human immunodeficiency virus type 1] [MA
pol polyprotein [Human immunodeficiency virus type 1]
likely ortholog of H. sapiens CUE domain containing 1 (CUEDC1) [Mus mus
JE0288 krueppel-type zinc finger protein - human
uromodulin-like 1 protein variant 9 [Homo sapiens]
reticulon 1 isoform A [Homo sapiens]
immunoglobulin heavy chain variable region [Homo sapiens]
nef [Human immunodeficiency virus type 1]
AF286555_1 envelope glycoprotein V3 region [Human immunodeficiency virus t
kinesin light chain 1K [Homo sapiens]
hypothetical protein [Homo sapiens]
envelope glycoprotein gp120 [Human immunodeficiency virus 1]
envelope glycoprotein [Human immunodeficiency virus type 1]
vpr protein [Human immunodeficiency virus 1]
FLJ00067 protein [Homo sapiens]
envelope glycoprotein [Human immunodeficiency virus type 1]
KRHU2 keratin 1, type II, cytoskeletal - human
hCG1813638 [Homo sapiens]
meningioma 1 [Homo sapiens]
serine/threonine protein kinase 11 [Homo sapiens]
nef protein [Human immunodeficiency virus 1]
S100 calcium binding protein A13, isoform CRA_b [Homo sapiens]
KIAA1429 protein [Homo sapiens]
hCG2005342 [Homo sapiens]
minor histocompatibility antigen HA-1 [Homo sapiens]
alpha (1,2) fucosyltransferase [Homo sapiens]
hypothetical protein [Homo sapiens]
envelope glycoprotein [Human immunodeficiency virus 1]
B42856 ubiquitin carrier protein E2 - human
CUTL1_HUMAN Homeobox protein cut-like 1 (CCAAT displacement protein) (CDP) [M
protease [Human immunodeficiency virus 1]
unnamed protein product [Homo sapiens]
envelope glycoprotein [Human immunodeficiency virus 1]
NS1 [Human bocavirus]
U06698 neuronal kinesin heavy chain from Homo sa
immunoglobulin heavy chain variable region [Homo sapiens]
antigen NY-CO-3 [Homo sapiens]
envelope glycoprotein [Human immunodeficiency virus 1]
zinc finger protein 673 [Homo sapiens]
tyrosylprotein sulfotransferase 1 [Homo sapiens]
vitelliform macular dystrophy 2-like 3 isoform 1 [Homo sapiens]
TBP-associated factor 13 [Homo sapiens]
DNA-dependent protein kinase catalytic subunit [Homo sapiens]
tetratricopeptide repeat domain 18 [Homo sapiens]
KIAA0820 protein [Homo sapiens]
TAT_HV1B9 Protein Tat (Transactivating regulatory protein)
hCG1987492 [Homo sapiens]
hypothetical protein LOC388284 [Homo sapiens]
modulator of apoptosis 1 [Homo sapiens]
X-ray repair cross complementing protein 3 [Homo sapiens]
oxidoreductase NAD-binding domain containing 1 [Homo sapiens]
anti-tetanus toxoid immunoglobulin heavy chain variable region [Homo sap
syntaxin 1B2 [Rattus norvegicus]
VRK3 protein [Homo sapiens]
TNKS1_HUMAN Tankyrase-1 (TANK1) (Tankyrase I) (TNKS-1) (TRF1-interacting anky
K1045_HUMAN Protein KIAA1045
hypothetical protein [Homo sapiens]
formiminotransferase cyclodeaminase [Homo sapiens]
polyprotein [Human rhinovirus 47]
hypothetical protein LOC79736 [Homo sapiens]
hematopoietic signal peptide-containing isoform 2 [Homo sapiens]
envelope glycoprotein [Human immunodeficiency virus 1]
leukemia-associated protein 2 [Homo sapiens]
KIAA0431 [Homo sapiens]
coiled-coil domain containing 42 [Homo sapiens]
Tubulin, beta [Homo sapiens]
actin-like protein [Homo sapiens]
unnamed protein product [Homo sapiens]
Na,K-ATPase catalytic subunit alpha-A protein [Homo sapiens]
F-box and WD repeat domain containing 11 isoform A [Homo sapiens]
S34775 nicotinic acetylcholine receptor epsilon chain precursor - human
S31503 H+/K+-exchanging ATPase (EC 3.6.3.10) ATP1AL1 - human (fragment)
ORF putative E6 [Human papillomavirus type 59]
pol polyprotein [Human immunodeficiency virus type 1]
Unknown [Homo sapiens]
coiled-coil domain containing 25 [Homo sapiens]
solute carrier family 10 (sodium/bile acid cotransporter family), memb
DNA packaging tegument protein UL25 [Human herpesvirus 3]
nuclear protein in testis, isoform CRA_b [Homo sapiens]
NEDD4_HUMAN E3 ubiquitin-protein ligase NEDD4
unnamed protein product [Homo sapiens]
AF258985_1 envelope glycoprotein [Human immunodeficiency virus type 1] [M
immunoglobulin E heavy chain variable region [Homo sapiens]
AF447582_1 HLCDGP1 [Homo sapiens]
tartrate resistant acid phosphatase 5 precursor [Homo sapiens]
envelope glycoprotein [Human immunodeficiency virus 1]
immunoglobulin heavy chain variable region [Homo sapiens]
immunoglobulin heavy chain variable region [Homo sapiens]
anaplastic lymphoma kinase (Ki-1), isoform CRA_c [Homo sapiens]
envelope glycoprotein [Human immunodeficiency virus type 1]
unnamed protein product [Homo sapiens]
envelope glycoprotein [Human immunodeficiency virus 1]
hCG201417 [Homo sapiens]
phosphotyrosyl phosphatase activator [Homo sapiens]
immunoglobulin heavy chain variable region [Homo sapiens]
ATP synthase, H+ transporting, mitochondrial F0 complex, subunit d isof
pol protein [Human immunodeficiency virus 1]
envelope glycoprotein [Human immunodeficiency virus type 1]
HESB like domain containing 1 [Homo sapiens]
protease [Human immunodeficiency virus 1]
functionless protein [Homo sapiens]
zinc finger, DHHC-type containing 11 [Homo sapiens]
glioma pathogenesis-related protein precursor [Homo sapiens]
AF067164_1 zinc finger protein 2 [Homo sapiens]
TRI25_HUMAN Tripartite motif-containing protein 25 (Zinc finger protein 147)
antibody, light chain variable regin to HIV1 gp41 [Homo sapiens]
FLJ00345 protein [Homo sapiens]
gag protein [Human immunodeficiency virus 1]
keratin [Homo sapiens]
envelope glycoprotein [Human immunodeficiency virus type 1]
zinc finger protein 519 [Homo sapiens]
fatty acid binding protein 5 (psoriasis-associated) [Homo sapiens]
hypothetical protein (similar to Human CGI-32 protein [Streptococcus p
nef protein [Human immunodeficiency virus type 1] [M
envelope glycoprotein [Human immunodeficiency virus 1]
hCG1790787, isoform CRA_b [Homo sapiens]
protease [Human immunodeficiency virus 1]
vpu [Human immunodeficiency virus 1]
leucine-rich repeat LGI family, member 4 [Homo sapiens]
rhophilin, Rho GTPase binding protein 1, isoform CRA_e [Homo sapiens] [
envelope glycoprotein [Human immunodeficiency virus type 1]
unnamed protein product [Homo sapiens]
sarco/endoplasmic reticulum Ca2+ -ATPase [Homo sapiens]
LEU2_HUMAN Leukemia-associated protein 2 (Deleted in lymphocytic leukemia 2)
progesterone receptor membrane component 1 [Homo sapiens]
immunoglobuliln heavy chain variable region [Homo sapiens]
C8ORFK32 protein [Homo sapiens]
unknown [Homo sapiens]
fusion protein [Human parainfluenza virus 3]
retinal outer segment membrane protein 1 [Homo sapiens]
immunoglobulin kappa light chain variable region [Homo sapiens]
hCG2038572 [Homo sapiens]
sialic acid binding Ig-like lectin 7 isoform 1 [Homo sapiens]
unknown [Homo sapiens]
putative TCPTP-interacting protein [Homo sapiens]
hypothetical protein [Homo sapiens]
nef protein [Human immunodeficiency virus 1]
gag protein [Human immunodeficiency virus 1]
GCN5 general control of amino-acid synthesis 5-like 2 (yeast), isoform
CXorf30 [Homo sapiens]
tat protein [Human immunodeficiency virus 1]
hypothetical protein [Homo sapiens]
envelope glycoprotein [Human immunodeficiency virus type 1]
unnamed protein product [Homo sapiens]
Homo sapiens zinc finger protein 202 [synthetic construct]
PDZ domain containing RING finger 3 [Homo sapiens]
AF289590_1 unknown [Homo sapiens]
C-type lectin domain family 3 member A [Homo sapiens]
envelope glycoprotein [Human immunodeficiency virus 1]
vif protein [Human immunodeficiency virus 1]
hypothetical protein LOC374977 [Homo sapiens]
protease [Human immunodeficiency virus 1]
hCG1645235, isoform CRA_b [Homo sapiens]
unnamed protein product [Homo sapiens]
KDEL1_HUMAN KDEL motif-containing protein 1 precursor
gp120 [Human immunodeficiency virus 1]
AF156064_1 pol protein [Human immunodeficiency virus type 1]
reverse transcriptase [Human immunodeficiency virus 1]
KIAA1152 protein [Homo sapiens]
envelope glycoprotein gp120 [Human immunodeficiency virus 1]
pol protein [Human immunodeficiency virus 1]
hypothetical protein [Homo sapiens]
nef protein [Human immunodeficiency virus 1]
reverse transcriptase [Human immunodeficiency virus 1]

## Sheet: CADASIL_3_RIPA
Description	P-value	Score	MW	Accession	Peptide (Hits)
SPTAN1 protein [Homo sapiens]	1.12801e-10	180.156	282106	31565122	19 (17 0 1 1 0)
neurofilament, medium polypeptide 150kDa [Homo sapiens]	1.76891e-11	154.29	102386	4885513	20 (17 1 2 0 0)
Na+/K+ -ATPase alpha 2 subunit proprotein [Homo sapiens]	1.20087e-09	138.268	112194	4502271	28 (21 2 1 3 1)
brain abundant, membrane attached signal protein 1 [Homo sapiens]	8.26072e-09	138.205	22680	30795231	23 (20 1 2 0 0)
clathrin heavy chain 1 [Homo sapiens]	3.01065e-06	132.151	191492	4758012	16 (13 0 1 1 1)
myelin basic protein isoform 1 [Homo sapiens]	1.97715e-09	130.204	21480	68509930	62 (50 6 3 0 3)
neurofilament, light polypeptide 68kDa [Homo sapiens]	4.44302e-07	110.19	61479.3	105990539	14 (12 2 0 0 0)
proteolipid protein [Rattus norvegicus]	3.48455e-07	104.2	30057.1	13591880	58 (48 4 4 2 0)
Na+/K+ -ATPase alpha 1 subunit isoform a proprotein [Homo sapiens]	4.40277e-07	104.194	112824	21361181	17 (16 0 0 1 0)
2',3'-cyclic-nucleotide 3'-phosphodiesterase (EC 3.1.4.37)	3.05409e-08	104.153	45070.4	180687	16 (9 4 0 1 2)
I38369 beta-tubulin - human (fragment)	1.80966e-13	98.2262	48848.5	2119276	16 (15 1 0 0 0)
tubulin, beta 4 [Homo sapiens]	5.40268e-11	94.2178	49553.9	21361322	20 (14 4 2 0 0)
neural cell adhesion molecule 1 isoform 3 [Homo sapiens]	2.08852e-09	90.1888	83718	115529478	11 (9 1 0 0 1)
Na+/K+ -ATPase beta 1 subunit isoform a [Homo sapiens]	1.36516e-07	90.1779	35038.9	4502277	14 (14 0 0 0 0)
microtubule-associated protein 1B isoform 1 [Homo sapiens]	0.000140219	88.1138	270452	5174525	9 (8 1 0 0 0)
Na+,K+ ATPase [Homo sapiens]	6.90886e-09	86.2363	111901	1359715	13 (11 2 0 0 0)
tubulin alpha 6 [Homo sapiens]	4.09288e-06	72.1972	49863.5	14389309	15 (8 4 1 1 1)
unnamed protein product [Homo sapiens]	2.3337e-06	68.1706	57919.5	28940	9 (8 1 0 0 0)
A Chain A, Crystal Structure Of A DictyosteliumTETRAHYMENA CHIMERA Actin (Mutan	1.54025e-09	66.2238	41719.9	7245526	14 (12 1 1 0 0)
chaperonin [Homo sapiens]	3.20568e-07	66.1224	61016.5	31542947	9 (3 5 0 1 0)
alpha-spectrin [Homo sapiens]	5.15807e-08	64.1329	43790.8	829111	7 (5 1 1 0 0)
B46091 H+-exporting ATPase (EC 3.6.3.6) chain A, vacuolar (VA68 type) - human	4.61697e-06	62.106	68204.5	1082432	8 (4 2 0 1 1)
synaptotagmin I [Homo sapiens]	4.72446e-08	58.2189	47542.8	5032139	7 (6 1 0 0 0)
myelin oligodendrocyte glycoprotein [Homo sapiens] [M	4.96861e-07	56.2144	28175	793839	10 (9 0 1 0 0)
internexin neuronal intermediate filament protein, alpha [Homo sapiens	0.00214661	54.0788	55357.5	14249342	10 (4 2 2 2 0)
MDHM_HUMAN Malate dehydrogenase, mitochondrial precursor	0.000244523	52.1424	35508.8	6648067	7 (5 0 2 0 0)
ATRB actin, skeletal muscle - rabbit	0.000367029	50.2052	41789.8	71611	10 (6 1 2 0 1)
ATP synthase, H+ transporting, mitochondrial F1 complex, alpha subunit	8.49772e-06	50.1643	59713.7	4757810	7 (7 0 0 0 0)
reticulon 1 isoform A [Homo sapiens]	0.000958779	50.136	83566.2	10863935	6 (3 2 0 1 0)
glial fibrillary acidic protein [Homo sapiens]	7.71356e-07	50.1329	49849.7	4503979	8 (7 1 0 0 0)
contactin 1 isoform 1 precursor [Homo sapiens]	0.000816482	50.0838	113249	28373117	5 (5 0 0 0 0)
Chain , Cdc42 From Human, Nmr, 20 Structures	3.54295e-05	48.1707	21473.2	2624582	8 (5 2 0 1 0)
dihydropyrimidinase-like 2 [Homo sapiens]	2.94161e-08	46.1886	62254.7	4503377	7 (6 0 1 0 0)
GNAO2_HUMAN Guanine nucleotide-binding protein G(o) subunit alpha 2	1.47653e-08	46.1666	40061.1	60416433	8 (5 2 1 0 0)
Titin [Homo sapiens]	0.0041647	46.0881	3812936	17066105	8 (1 2 0 5 0)
brain creatine kinase [Homo sapiens]	4.27988e-09	44.1765	42617.4	21536286	7 (4 0 2 0 1)
ATP synthase, H+ transporting, mitochondrial F0 complex, subunit d isof	4.06294e-06	44.1574	18479.5	5453559	7 (6 0 0 1 0)
tubulin, alpha 1B [Mus musculus]	0.00010301	42.2337	50119.6	34740335	10 (8 1 0 0 1)
heavy neurofilament subunit [Homo sapiens]	1.35852e-06	42.1766	111713	1841430	7 (6 0 0 0 1)
H4 histone family, member A [Homo sapiens]	7.67684e-06	42.127	11360.4	4504301	7 (5 1 0 0 1)
guanine nucleotide-binding protein, beta-1 subunit [Mus musculus]	1.62503e-08	40.1896	37353	6680045	4 (4 0 0 0 0)
heat shock protein 90kDa alpha (cytosolic), class A member 1 isoform 2	2.03368e-05	40.1565	84620.7	40254816	5 (5 0 0 0 0)
A40671 dynamin, internal form 1, long C-terminal form - human [M	0.00106501	40.151	97201	539580	6 (1 2 2 0 1)
syntaxin binding protein 1 isoform a [Homo sapiens]	0.00173517	40.1393	68692.3	4507297	7 (4 0 0 2 1)
tenascin-R [Homo sapiens]	0.000236341	40.1286	149479	1617316	5 (3 0 1 1 0)
growth associated protein 43 [Homo sapiens]	2.32037e-13	38.2948	24787.9	4503911	5 (1 3 0 1 0)
B Chain B, T-To-T(High) Quaternary Transitions In Human Hemoglobin: Deshis146b	0.000276758	38.1929	15720.2	61679604	6 (3 3 0 0 0)
voltage-dependent anion channel 1 [Homo sapiens]	9.56451e-07	38.1653	30753.6	4507879	7 (6 1 0 0 0)
VDAC2 [Homo sapiens]	9.23102e-06	38.1148	30393	48146045	5 (3 1 1 0 0)
AT2B4_HUMAN Plasma membrane calcium-transporting ATPase 4 (PMCA4) (Plasma mem	0.000128197	38.0736	137833	14286105	4 (3 1 0 0 0)
alpha 2 globin [Homo sapiens]	8.95876e-07	32.1581	15247.9	4504345	6 (5 0 0 0 1)
tubulin, beta, 4 [Homo sapiens]	1.21407e-08	32.1478	50400.3	50592996	9 (2 5 1 1 0)
H+-ATP synthase subunit b [Homo sapiens]	7.85769e-05	32.1132	28876.3	509291	5 (3 1 0 1 0)
ras homolog gene family, member B [Homo sapiens]	0.00274138	32.0883	22109.1	4757764	4 (0 4 0 0 0)
tubulin polymerization promoting protein [Homo sapiens]	2.35156e-11	30.173	23679.2	5902018	3 (3 0 0 0 0)
CD9 antigen [Homo sapiens]	1.16292e-08	30.17	25399	4502693	5 (5 0 0 0 0)
solute carrier family 25 (mitochondrial carrier; adenine nucleotide tr	1.36756e-06	30.1648	33043.2	55749577	4 (4 0 0 0 0)
glyceraldehyde-3-phosphate dehydrogenase [Homo sapiens]	1.89815e-07	30.1613	36030.4	7669492	7 (6 1 0 0 0)
heat shock 70kDa protein 5 [Homo sapiens]	3.74772e-07	30.1277	72288.5	16507237	3 (3 0 0 0 0)
heat shock 70kDa protein 8 isoform 2 [Homo sapiens]	3.52582e-06	30.1192	53484.5	24234686	3 (3 0 0 0 0)
ubiquinol-cytochrome c reductase core protein I [Homo sapiens]	3.83718e-05	30.1158	52612.5	46593007	3 (3 0 0 0 0)
STX1B_HUMAN Syntaxin-1B1 (Syntaxin 1B)	7.4236e-06	30.1014	33410.1	2501085	6 (5 0 1 0 0)
mitochondrial ATP synthase, O subunit precursor [Homo sapiens]	4.30592e-08	30.0877	23262.7	4502303	3 (3 0 0 0 0)
cytochrome c oxidase subunit Vb precursor [Homo sapiens]	0.000753286	30.0872	13686.9	17017988	4 (3 0 0 0 1)
unnamed protein product [Homo sapiens]	0.00887272	30.0798	149049	34532097	4 (2 1 0 0 1)
histone H2B [Homo sapiens]	1.58981e-09	28.2394	13927.6	1568557	6 (4 2 0 0 0)
unnamed protein product [Homo sapiens]	1.82863e-09	28.196	49811	10433717	7 (3 2 1 1 0)
A Chain A, Crystal Structure Of Caenorhabditis Elegans Mg-Atp Actin Complexed	7.79814e-06	28.1928	41637.7	14278147	3 (2 1 0 0 0)
fructose bisphosphate aldolase [Homo sapiens]	0.00023343	28.1619	39417.2	312137	3 (2 1 0 0 0)
cell cycle exit and neuronal differentiation 1 [Homo sapiens]	0.00689262	28.1	14944.8	30795225	4 (1 2 0 0 1)
tyrosine 3-monooxygenase/tryptophan 5-monooxygenase activation protein,	0.000317746	28.0869	28064.8	4507949	3 (2 1 0 0 0)
AF117818_1 L protein [Human parainfluenza virus 1] [M	0.00779007	28.0757	253496	4566775	4 (1 1 1 1 0)
KIAA1964 protein [Homo sapiens]	0.00326215	28.0604	85722.5	18916814	3 (2 1 0 0 0)
ubiquinol-cytochrome c reductase core protein II [Homo sapiens]	9.01743e-07	26.1514	48412.9	50592988	4 (2 0 0 1 1)
gelsolin isoform a precursor [Homo sapiens]	9.59208e-05	26.1273	85644.2	4504165	3 (1 2 0 0 0)
SYN2_HUMAN Synapsin-2 (Synapsin II)	0.000501005	26.1244	62928.8	6686022	5 (3 0 0 1 1)
hCG1784313, isoform CRA_b [Homo sapiens]	0.00495736	26.0857	91579.1	119620539	3 (2 0 1 0 0)
KIAA1603 protein [Homo sapiens]	0.00927066	26.0781	190236	29421202	3 (2 0 1 0 0)
tropomodulin 2 (neuronal) [Homo sapiens]	5.72902e-08	24.1617	39570.7	7657647	3 (2 0 0 1 0)
novel protein similar to human and mouse cyclin M4 (CNNM4) [Danio reri	0.000852466	24.0942	67875.2	148726504	4 (1 1 0 1 1)
anti-HAV capsid immunoglobulin G heavy chain variable region [Homo sapie	0.0071375	24.0655	13468.5	29650299	3 (1 1 1 0 0)
glutamate transporter [Homo sapiens]	4.94538e-11	22.1426	61664.6	488752	3 (1 0 2 0 0)
peptidyl arginine deiminase, type II [Homo sapiens]	0.00667033	22.0948	75515.5	122939159	3 (1 0 2 0 0)
bridging integrator 1 isoform 1 [Homo sapiens]	0.00157656	22.0886	64659.6	21536400	3 (2 0 0 0 1)
DHPR_HUMAN Dihydropteridine reductase (HDHPR) (Quinoid dihydropteridine redu	3.00142e-05	22.0845	25773	118572639	6 (5 0 0 0 1)
brevican isoform 1 [Homo sapiens]	0.00664866	22.0713	99056.2	38372935	3 (1 1 0 1 0)
MYH13_HUMAN Myosin-13 (Myosin heavy chain 13) (Myosin heavy chain, skeletal m	0.000212068	22.0626	223539	13431717	3 (1 1 0 1 0)
pyruvate kinase 3 isoform 1 [Homo sapiens]	1.12209e-06	20.2161	57900.2	33286418	2 (2 0 0 0 0)
vacuolar H+ATPase B2 [Homo sapiens]	1.39753e-08	20.1919	56465	19913428	2 (2 0 0 0 0)
guanine nucleotide binding protein, alpha activating polypeptide O [Ho	1.0008e-09	20.1839	40024.9	10567816	3 (3 0 0 0 0)
visinin-like 1 [Mus musculus]	1.18363e-05	20.1804	22128	6755983	5 (3 1 0 0 1)
tyrosine 3-monooxygenase/tryptophan 5-monooxygenase activation protein,	3.8101e-07	20.1579	28284.9	9507245	3 (3 0 0 0 0)
aspartate aminotransferase 1 [Homo sapiens]	0.000177247	20.1575	46218.6	4504067	2 (2 0 0 0 0)
ubiquitin carboxyl-terminal esterase L1 (ubiquitin thiolesterase) [Hom	1.66929e-05	20.1411	24808.5	21361091	2 (2 0 0 0 0)
glycoprotein M6A isoform 1 [Homo sapiens]	0.00185466	20.1313	31188.4	14149619	2 (2 0 0 0 0)
vesicle-associated membrane protein 2 (synaptobrevin 2) [Homo sapiens]	0.00137652	20.1306	12640.7	7657675	5 (5 0 0 0 0)
clusterin isoform 2 [Homo sapiens]	0.00132988	20.1296	52461.1	42740907	2 (2 0 0 0 0)
calmodulin [Homo sapiens]	2.76993e-09	20.1256	17152	825635	2 (2 0 0 0 0)
unnamed protein product [Homo sapiens]	8.63511e-06	20.1255	45966.2	21758400	2 (2 0 0 0 0)
DPYL4_HUMAN Dihydropyrimidinase-related protein 4 (DRP-4) (Collapsin response	0.000127378	20.1253	61838.5	68067941	5 (0 1 2 1 1)
apolipoprotein D precursor [Homo sapiens]	0.000815085	20.1126	21261.8	4502163	3 (3 0 0 0 0)
polycystin-1L1 [Homo sapiens]	0.00308072	20.1125	315231	19923084	5 (0 1 2 1 1)
Human Diff6,H5,CDC10 homologue [Homo sapiens]	0.000201631	20.1017	46555.7	1040689	2 (2 0 0 0 0)
adducin 1 (alpha) isoform a [Homo sapiens]	0.00244128	20.0964	80904.8	29826319	2 (2 0 0 0 0)
sirtuin 2 isoform 1 [Homo sapiens]	7.23454e-05	20.0963	43154.5	13775600	2 (2 0 0 0 0)
ADT3_HUMAN ADP/ATP translocase 3 (Adenine nucleotide translocator 2) (ANT 3) (A	0.000397729	20.0957	32845.2	113463	2 (2 0 0 0 0)
synapsin I isoform Ia [Homo sapiens]	6.63352e-05	20.094	74065.8	19924099	2 (2 0 0 0 0)
similar to t-complex 1; T-complex locus TCP-1; t-complex 1 (a murine tcp	0.00161971	20.0927	19812.7	51094756	8 (8 0 0 0 0)
NBEA_HUMAN Protein neurobeachin (Lysosomal-trafficking regulator 2) (Protein	0.000490718	20.0869	327602	32171483	2 (2 0 0 0 0)
neural cell adhesion molecule 1, isoform CRA_a [Homo sapiens]	0.00269696	20.0839	119374	119587605	3 (1 1 0 0 1)
cell adhesion molecule 3 [Homo sapiens]	0.000419746	20.0814	46991.5	11056046	2 (2 0 0 0 0)
tubulin, alpha-like 3 [Homo sapiens]	0.00102537	20.0714	49876.8	13376181	2 (2 0 0 0 0)
enolase 1 [Homo sapiens]	0.00374126	20.0697	47139.4	4503571	3 (2 1 0 0 0)
R Chain R, Twinning In Crystals Of Human Skeletal Muscle D- Glyceraldehyde-3-Pho	2.5246e-05	20.0689	35853.3	230867	4 (1 1 2 0 0)
KIAA0366 [Homo sapiens]	0.00829918	20.0659	135027	2224673	2 (2 0 0 0 0)
dendritic cell nectin-like protein 1 short isoform [Homo sapiens]	0.00209793	20.0625	25639	25777796	2 (2 0 0 0 0)
hypothetical protein [Homo sapiens]	0.00573216	20.0601	245495	31874003	2 (2 0 0 0 0)
hypothetical protein [Homo sapiens]	0.00834208	20.0516	120235	50949774	2 (2 0 0 0 0)
RAB3A, member RAS oncogene family [Homo sapiens]	6.50919e-08	18.192	24968.1	4506367	2 (1 1 0 0 0)
Nogo-A protein [Homo sapiens]	2.3768e-06	18.1731	129861	9408096	3 (2 1 0 0 0)
synaptosomal-associated protein, 25kDa [Homo sapiens]	9.04326e-09	18.1654	10676	24740601	2 (1 1 0 0 0)
S-phase kinase-associated protein 1A isoform b [Homo sapiens]	3.16062e-05	18.1299	18646.2	25777713	3 (1 2 0 0 0)
GDP dissociation inhibitor 1 [Homo sapiens]	3.06856e-05	18.124	50550.2	4503971	3 (1 0 0 2 0)
CD92 protein [Homo sapiens]	0.000194449	18.1207	72933.4	16945323	4 (2 0 1 0 1)
WMBEHQ UL5 protein - human herpesvirus 2 (strain HG52) (fragment)	0.00448991	18.1191	88093.8	74001	10 (1 7 2 0 0)
rasGTPase activating protein [Homo sapiens]	0.00793576	18.1097	47110.8	1871475	2 (1 1 0 0 0)
unnamed protein product [Homo sapiens]	0.00398167	18.0923	48339.2	16552943	2 (1 1 0 0 0)
synaptosomal-associated protein 25 isoform SNAP25A [Homo sapiens]	0.00474919	18.0909	23321.2	18765733	2 (1 1 0 0 0)
Chain , Human Serum Albumin In A Complex With Myristic Acid And Tri-Iodobenz	6.73972e-05	18.0877	65992.9	4389275	2 (1 1 0 0 0)
unnamed protein product [Homo sapiens]	0.00320199	18.0847	87498	21754039	3 (1 0 1 0 1)
aconitase 2 precursor [Homo sapiens]	0.00195625	18.0835	85372	4501867	2 (1 1 0 0 0)
hCG1816712 [Homo sapiens]	0.000661772	18.0768	9204.51	119626795	2 (1 1 0 0 0)
syntaxin 1B2 [Rattus norvegicus]	0.00866271	18.0728	33223.8	6981600	2 (1 1 0 0 0)
KIAA0318 [Homo sapiens]	0.00122754	18.0702	122245	2224577	2 (1 1 0 0 0)
hypothetical protein LOC434725 [Mus musculus]	1.24984e-05	18.0637	57823.7	148235086	2 (1 1 0 0 0)
DIP2 disco-interacting protein 2 homolog C (Drosophila), isoform CRA_a	0.00688986	18.0636	11595	119606941	3 (0 1 1 1 0)
PC6010 RNA helicase Gu - human (fragment)	0.00665614	18.0604	89195.6	2135315	2 (1 1 0 0 0)
T14751 hypothetical protein DKFZp566D143.1 - human (fragment)	0.000232219	18.0564	43773.4	7512808	2 (1 1 0 0 0)
late protein [Human papillomavirus type 9]	0.000642117	18.0556	57455.7	9627403	2 (1 1 0 0 0)
H(+)-transporting two-sector ATPase [Homo sapiens]	8.53986e-07	16.1325	28245.3	7706757	2 (1 0 1 0 0)
collapsin response mediator protein 1 isoform 2 [Homo sapiens]	1.12438e-05	16.1253	62144.8	4503051	3 (2 0 1 0 0)
Raichu404X [Homo sapiens]	0.00039272	16.1245	84962	14595132	2 (1 0 1 0 0)
ubiquinol-cytochrome c reductase binding protein [Homo sapiens]	8.66092e-05	16.1025	13522	5454152	2 (1 0 1 0 0)
hypothetical protein LOC345651 [Homo sapiens]	0.000163538	16.0985	41976	63055057	3 (0 3 0 0 0)
AF484490_7 envelope glycoprotein [Human immunodeficiency virus 1]	0.00814085	16.0959	97233.7	25166757	2 (0 2 0 0 0)
patatin-like phospholipase domain containing 3 [Homo sapiens]	0.00230051	16.0915	52830.9	17196626	2 (1 0 1 0 0)
ADP-ribosylation factor 3 [Homo sapiens]	0.000137419	16.0857	20587.7	4502203	2 (1 0 1 0 0)
CLSPN_HUMAN Claspin (hClaspin) (Hu-Claspin)	0.00430726	16.0816	150275	73917807	3 (0 1 1 0 1)
A Chain A, Human Prion Protein	0.0022911	16.0783	22876.6	6730485	2 (1 0 1 0 0)
PCM1 protein [Homo sapiens]	0.00579765	16.0753	46292.5	62020519	3 (0 0 2 1 0)
unnamed protein product [Homo sapiens]	0.00641333	16.0742	42580.7	16554251	2 (1 0 1 0 0)
unnamed protein product [Homo sapiens]	0.000307619	16.0721	77712.7	10438323	2 (1 0 1 0 0)
contactin associated protein 1 [Homo sapiens]	0.00734265	16.0702	156167	4505463	2 (1 0 1 0 0)
novel protein similar to vertebrate Fraser syndrome 1 homolog (human)	0.00437563	16.0666	436539	122890828	4 (0 1 0 1 2)
putative protein serine/threonine kinase [Dictyostelium discoideum AX4	0.00104153	16.0643	212878	66818841	2 (1 0 1 0 0)
adenylate cyclase 9 [Homo sapiens]	0.00552654	16.0637	150604	50959205	2 (0 2 0 0 0)
semaphorin 7A [Homo sapiens]	0.00385639	16.0626	74776.3	4504237	2 (1 0 1 0 0)
sodium channel, nonvoltage-gated 1, beta [Homo sapiens]	0.00411446	16.0473	72611.8	124301196	2 (0 2 0 0 0)
synaptophysin [Homo sapiens]	4.83379e-05	14.1778	32083.5	899301	2 (1 0 0 1 0)
tyrosine 3/tryptophan 5 -monooxygenase activation protein, zeta polypep	2.11477e-05	14.1343	27727.7	4507953	3 (2 0 0 1 0)
breast carcinoma amplified sequence 1 [Homo sapiens]	5.75214e-05	14.1317	61681.5	4502373	3 (1 0 0 2 0)
KIAA1199 hypothetical protein [Homo sapiens]	0.00142671	14.1117	90638.5	8518188	2 (1 0 0 1 0)
guanine nucleotide binding protein (G protein), gamma 3 subunit [Mus mu	4.59913e-06	14.1019	8299.16	6754022	2 (1 0 0 1 0)
Protocadherin beta 7 [Homo sapiens]	0.00107367	14.0983	86697	68533589	2 (1 0 0 1 0)
region with similarity to Homo sapiens TAFII55 encoded by Genbank Accessi	0.000577972	14.0911	55512.6	3213201	2 (0 1 1 0 0)
envelope glycoprotein [Human immunodeficiency virus type 1]	0.00448216	14.0869	97270.1	3132818	2 (0 1 1 0 0)
solute carrier family 25 (mitochondrial carrier, Aralar), member 12 [H	0.00279096	14.0824	74715	21361103	2 (1 0 0 1 0)
Z804B_HUMAN Zinc finger protein 804B	0.0094613	14.0798	152442	148887330	3 (0 0 2 0 1)
E1B 19K protein [Human adenovirus type 9]	0.00227993	14.0793	21128.5	4323357	2 (1 0 0 1 0)
hypothetical protein DDBDRAFT_0167764 [Dictyostelium discoideum AX4]	0.00654442	14.0745	126479	66821059	2 (1 0 0 1 0)
unnamed protein product [Homo sapiens]	0.00957699	14.0725	86974.1	10434785	3 (1 0 1 1 0)
UL77 [Human herpesvirus 5 strain AD169]	0.00735998	14.0721	71142.4	9625762	2 (0 1 1 0 0)
unnamed protein product [Homo sapiens]	0.000897898	14.0701	17085.1	34534997	2 (1 0 0 1 0)
gag protein [Human immunodeficiency virus 1]	0.0032742	14.062	12890.4	37701274	2 (0 1 1 0 0)
signal transducer and activator of transcription 3 isoform 1 [Homo sap	0.0059037	14.0519	88011.4	21618340	2 (0 1 1 0 0)
hypothetical protein [Homo sapiens]	0.0053166	14.0505	94282.1	21732433	2 (1 0 0 1 0)
hCG2038369 [Homo sapiens]	0.000342354	14.0491	16760.4	119595817	2 (1 0 0 1 0)
immunoglobulin heavy chain variable region [Homo sapiens]	0.0052958	14.0482	10314	91979838	2 (1 0 0 1 0)
zyg-11 homolog B (C. elegans)-like [Homo sapiens]	0.00304236	14.0449	88112.8	33589814	2 (1 0 0 1 0)
tubulin, beta, 2 [Homo sapiens]	1.82863e-09	12.1958	49799	5174735	6 (1 0 4 0 1)
N-ethylmaleimide sensitive fusion protein attachment protein beta [Mus	4.88676e-10	12.1659	33535.5	29789104	2 (1 0 0 0 1)
A54770 N-acetylglucosamine-specific receptor 1 precursor - human	0.00888356	12.1437	52304.9	627551	2 (0 0 2 0 0)
phosphoglycerate mutase 1 (brain) [Homo sapiens]	0.000847274	12.1057	28785.8	4505753	2 (1 0 0 0 1)
unnamed protein product [Homo sapiens]	4.67061e-06	12.1028	40975.2	34532426	3 (0 2 0 1 0)
nucleoporin 107kDa [Homo sapiens]	0.00403968	12.0818	106307	9966881	2 (0 0 2 0 0)
SI:bZ6L08.1 (novel protein similar to human cadherin, EGF LAG seven-pas	0.00912788	12.0809	197357	26788046	2 (1 0 0 0 1)
GNAS complex locus isoform f [Homo sapiens]	0.00566306	12.0778	45723	117938762	11 (2 1 2 1 5)
N-myc downstream-regulated gene 2 isoform a [Homo sapiens]	8.74702e-05	12.0753	40772.2	42544211	2 (1 0 0 0 1)
COMM domain containing 5 [Homo sapiens]	0.00380175	12.0749	24654.9	19923430	2 (1 0 0 0 1)
envelope protein [Human immunodeficiency virus 1] [	0.00915635	12.0747	97602.5	55736000	2 (0 0 2 0 0)
nucleoporin 155kDa isoform 1 [Homo sapiens]	0.000421064	12.0731	155100	24430149	2 (0 1 0 1 0)
late protein L1 [Human papillomavirus - 2]	0.00499627	12.0709	57157.1	13186282	2 (0 1 0 1 0)
Hypothetical protein MGC4655 [Homo sapiens]	1.40252e-05	12.0686	41865.9	15082568	2 (0 1 0 1 0)
unnamed protein product [Homo sapiens]	0.00608338	12.0619	37443.7	10439767	2 (1 0 0 0 1)
FLJ00139 protein [Homo sapiens]	0.00450257	12.0582	60829.1	18676484	2 (0 0 2 0 0)
hCG2040427 [Homo sapiens]	0.00858715	12.0552	34644.9	119621844	3 (0 0 3 0 0)
unnamed protein product [Homo sapiens]	0.00523332	12.0519	46480.6	7020319	2 (0 1 0 1 0)
gp120 protein [Human immunodeficiency virus 1] [MA	0.00932888	12.0516	21654.8	34786640	2 (0 0 2 0 0)
14.1 kDa early protein [Human adenovirus type 4]	0.00519292	12.0515	24023.6	51173212	2 (1 0 0 0 1)
putative transposase [Homo sapiens]	0.00361237	12.0499	51633.8	2226004	2 (1 0 0 0 1)
CA096_HUMAN Uncharacterized protein C1orf96	0.0034008	12.048	30197.8	145558871	3 (0 0 1 1 1)
NADH dehydrogenase (ubiquinone) 1 alpha subcomplex, 7, 14.5kDa [Pa	0.00388143	12.0477	13172	120952308	2 (1 0 0 0 1)
ligand of numb-protein X 2 [Homo sapiens]	0.00571757	12.0425	75956.3	24025688	2 (1 0 0 0 1)
histone H2A [Homo sapiens]	3.24591e-10	10.2905	13986.8	28195394	5 (5 0 0 0 0)
tubulin, alpha 1a [Mus musculus]	1.64189e-06	10.218	49927.7	6678465	1 (1 0 0 0 0)
vacuolar proton ATPase [Homo sapiens]	5.56067e-06	10.2145	26213.8	313014	1 (1 0 0 0 0)
delta globin [Homo sapiens]	4.70157e-10	10.2015	16045.3	4504351	1 (1 0 0 0 0)
H2A histone family, member O [Homo sapiens]	5.02164e-06	10.1971	14086.9	4504251	2 (2 0 0 0 0)
RAB3B, member RAS oncogene family [Homo sapiens]	6.50919e-08	10.192	24742.1	19923750	1 (1 0 0 0 0)
limbic system-associated membrane protein [Homo sapiens]	3.37635e-08	10.1868	37370.2	45594240	1 (1 0 0 0 0)
cytochrome c-1 [Homo sapiens]	7.34388e-06	10.1749	35367	21359867	1 (1 0 0 0 0)
cofilin 1 (non-muscle) [Homo sapiens]	8.87647e-06	10.1709	18490.7	5031635	1 (1 0 0 0 0)
myelin associated glycoprotein isoform a precursor [Homo sapiens]	3.12855e-06	10.1703	69024.8	11225258	1 (1 0 0 0 0)
syntaxin 1A (brain) [Homo sapiens]	0.00338436	10.1664	33002.7	4759182	1 (1 0 0 0 0)
cytochrome c oxidase subunit VIIa polypeptide 2 (liver) precursor [Homo	0.000143336	10.1646	9390.1	4502989	1 (1 0 0 0 0)
unnamed protein product [Homo sapiens]	0.00164042	10.1637	55559.6	10438086	3 (1 1 1 0 0)
Thy-1 cell surface antigen [Homo sapiens]	9.33868e-06	10.1623	17923.3	19923362	3 (2 1 0 0 0)
tyrosine 3/tryptophan 5 -monooxygenase activation protein, theta polype	0.000343392	10.1613	27746.8	5803227	1 (1 0 0 0 0)
A Chain A, Crystal Structure Of Human Cd81 Extracellular Domain, A Receptor Fo	2.10468e-07	10.1598	9898.87	13399775	1 (1 0 0 0 0)
Manganese superoxide dismutase [Homo sapiens]	7.36796e-05	10.1568	24694.5	34707	1 (1 0 0 0 0)
Chain , Human Complement Regulatory Protein Cd59 (Extracellular Region, Resid	1.96193e-06	10.1556	8080.61	515118	2 (2 0 0 0 0)
A Chain A, Cyclophilin A Complexed With Dipeptide Gly-Pro	5.35282e-07	10.1527	17869.8	1633054	1 (1 0 0 0 0)
crystallin, alpha B [Homo sapiens]	1.10162e-06	10.1505	20146.4	4503057	1 (1 0 0 0 0)
AF471460_1 Ig heavy chain variable region, VH3 family [Homo sapiens] [MAS	0.000218696	10.15	13217.3	33319464	1 (1 0 0 0 0)
H2A histone family, member A [Homo sapiens]	3.81114e-08	10.1491	14127	10645195	3 (3 0 0 0 0)
Chain , Aldolase A (E.C.4.1.2.13)	5.761e-06	10.1439	39264.3	229674	1 (1 0 0 0 0)
hypothetical protein [Homo sapiens]	0.00304218	10.1309	22204.3	6624942	1 (1 0 0 0 0)
AF138453_1 envelope glycoprotein [Human immunodeficiency virus type 1] [MA	0.00202902	10.1304	22264.1	6958810	1 (1 0 0 0 0)
ST1B2 [Homo sapiens]	0.000883218	10.1298	34804.6	2826146	3 (2 1 0 0 0)
glycoprotein M6B isoform 1 [Homo sapiens]	2.54653e-05	10.1293	36195.7	50263048	1 (1 0 0 0 0)
prostaglandin H2 D-isomerase [Homo sapiens]	0.000191074	10.1265	21015.3	32171249	1 (1 0 0 0 0)
unnamed protein product [Homo sapiens]	0.000237318	10.126	46800.1	21753491	1 (1 0 0 0 0)
truncated pol protein [Human immunodeficiency virus type 1]	0.00527841	10.1199	3841.16	13605123	1 (1 0 0 0 0)
cytochrome c oxidase subunit VIb [Homo sapiens]	0.00023299	10.1189	10185.7	4502985	2 (2 0 0 0 0)
NADH dehydrogenase (ubiquinone) 1 alpha subcomplex, 5 [Homo sapiens]	0.000127818	10.113	13450.2	4826848	1 (1 0 0 0 0)
gag protein [Human immunodeficiency virus 1]	0.00770752	10.1119	55119.2	90812182	2 (2 0 0 0 0)
nuclear autoantigenic sperm protein isoform 2 [Homo sapiens]	0.00562378	10.1063	85186.1	27262628	9 (0 4 1 2 2)
AF150075_1 envelope glycoprotein gp120 [Human immunodeficiency virus type	0.00356216	10.1048	10829.7	5456881	1 (1 0 0 0 0)
reverse transcriptase [Human immunodeficiency virus 1]	0.00896762	10.1028	38364.7	58761427	2 (2 0 0 0 0)
GDAP1_HUMAN Ganglioside-induced differentiation-associated protein 1 (GDAP1)	0.00148042	10.102	41225.8	38257679	1 (1 0 0 0 0)
glutamate dehydrogenase 1 [Homo sapiens]	0.000444308	10.102	61359.3	4885281	1 (1 0 0 0 0)
S22902 Ig kappa chain V region - human	0.00183455	10.1005	15568.7	106540	1 (1 0 0 0 0)
neurofilament-66; NF-66 [Homo sapiens]	0.00479208	10.0994	54875.2	994844	1 (1 0 0 0 0)
lanthionine synthetase C-like protein 1 [Homo sapiens]	4.05633e-05	10.0989	45253.6	5174445	1 (1 0 0 0 0)
hCG2041022 [Homo sapiens]	0.0092905	10.0987	6778.54	119588508	1 (1 0 0 0 0)
KIAA1379 protein [Homo sapiens]	0.000583447	10.098	52337.5	20521900	1 (1 0 0 0 0)
calnexin precursor [Homo sapiens]	7.37921e-06	10.097	67526	10716563	1 (1 0 0 0 0)
Chain , Human Rhoa Complexed With Gtp Analogue	0.00124236	10.0968	20557.3	3318980	1 (1 0 0 0 0)
beta actin [Homo sapiens]	0.00113719	10.0968	41709.7	4501885	2 (1 0 0 1 0)
env polypeptide, gp41 [Human immunodeficiency virus 1]	0.00158458	10.0957	24100.7	8920071	1 (1 0 0 0 0)
I54323 sodium channel alpha subunit - human	0.00669631	10.0945	207780	2119597	3 (0 1 0 1 1)
AT12A_HUMAN Potassium-transporting ATPase alpha chain 2 (Proton pump) (Non-ga	2.10924e-05	10.0939	115825	20141250	1 (1 0 0 0 0)
ATP synthase, H+ transporting, mitochondrial F0 complex, subunit F6 is	1.40743e-06	10.0932	12579.6	18644883	1 (1 0 0 0 0)
secreted frizzled-related protein 2 precursor [Homo sapiens]	0.00216161	10.0932	33467.8	48475052	4 (2 1 0 0 1)
protein phosphatase 3 (formerly 2B), catalytic subunit, alpha isoform (	0.00504781	10.0924	58650.4	6715568	1 (1 0 0 0 0)
adenosine deaminase domain containing 1 (testis-specific) [Homo sapien	0.00186338	10.092	64370.2	21245124	1 (1 0 0 0 0)
beta defensin 127 preproprotein [Homo sapiens]	0.00262078	10.0912	11334.9	21040279	1 (1 0 0 0 0)
H2A histone family, member Z [Homo sapiens]	0.00147464	10.0911	13544.5	4504255	1 (1 0 0 0 0)
pyruvate dehydrogenase kinase, isozyme 1 [Homo sapiens]	0.00385412	10.0905	49213.1	4505689	1 (1 0 0 0 0)
phosphoglycerate kinase 1 [Homo sapiens]	0.00372683	10.0904	44586.2	4505763	1 (1 0 0 0 0)
pol protein [Human immunodeficiency virus type 1] [M	0.000950215	10.0904	37377	9938715	1 (1 0 0 0 0)
fumarylacetoacetate hydrolase domain containing 2A [Homo sapiens]	0.00183455	10.0892	34560.1	7705608	1 (1 0 0 0 0)
guanine nucleotide binding protein (G protein), gamma 7 [Homo sapiens]	0.00055393	10.0882	7516.95	32698769	1 (1 0 0 0 0)
G01650 malate dehydrogenase (EC 1.1.1.37), cytosolic - human [M	2.69327e-06	10.0879	36392	7431153	1 (1 0 0 0 0)
gag protein [Human immunodeficiency virus 1]	0.00092219	10.0877	55769.5	124389770	1 (1 0 0 0 0)
capsid protein [Human rotavirus 4]	0.000245125	10.0872	87169	13111350	1 (1 0 0 0 0)
zinc finger protein 439 [Homo sapiens]	0.00695718	10.0868	58357.4	22748625	1 (1 0 0 0 0)
hypothetical protein [Homo sapiens]	0.000231361	10.0868	110722	52545742	1 (1 0 0 0 0)
gag-pol polyprotein precursor [Human immunodeficiency virus 1]	0.0042543	10.0855	67451.6	94732055	1 (1 0 0 0 0)
ATP synthase, H+ transporting, mitochondrial F1 complex, beta subunit	0.00794393	10.0853	56524.7	32189394	3 (2 0 0 1 0)
AF184506_1 gag protein [Human immunodeficiency virus type 1]	0.00896882	10.0853	27668.9	6815688	1 (1 0 0 0 0)
unnamed protein product [Homo sapiens]	0.000369568	10.0852	14798.1	34534938	1 (1 0 0 0 0)
hypothetical protein [Homo sapiens]	0.00802863	10.0848	47524.3	21739836	1 (1 0 0 0 0)
AF227969_1 SH2-B gamma signaling protein [Homo sapiens]	0.000953566	10.0847	72113.1	8163913	1 (1 0 0 0 0)
Plasminogen [Homo sapiens]	0.00273807	10.0845	90526.2	38051823	1 (1 0 0 0 0)
envelope glycoprotein [Human immunodeficiency virus type 1]	0.00208472	10.0826	11968.2	20147052	1 (1 0 0 0 0)
KIAA1374 protein [Homo sapiens]	0.00560587	10.0826	86390.6	7243129	1 (1 0 0 0 0)
MEI1 protein [Homo sapiens]	0.0069083	10.0816	64264.3	19263497	1 (1 0 0 0 0)
hypothetical protein LOC150244 [Homo sapiens]	0.00860622	10.08	17459.3	22749057	1 (1 0 0 0 0)
coiled-coil domain containing 112 isoform 1 [Homo sapiens]	0.00608213	10.079	61882.7	94680976	1 (1 0 0 0 0)
envelope glycoprotein [Human immunodeficiency virus 1]	0.00575177	10.0784	96818.6	148469932	1 (1 0 0 0 0)
unnamed protein product [Homo sapiens]	0.00256884	10.0779	160054	34535967	1 (1 0 0 0 0)
alpha-1,4-galactosyltransferase [Homo sapiens] [MAS	0.00309155	10.0776	40532.9	45775235	3 (1 1 0 1 0)
hCG2038290 [Homo sapiens]	0.0025353	10.0772	6863.7	119586930	2 (0 0 1 1 0)
histone methyltransferase 1 [Danio rerio]	0.00123352	10.077	117971	71834420	2 (0 1 0 0 1)
neuroplastin isoform a precursor [Homo sapiens]	0.000104111	10.0753	31271.9	9257240	1 (1 0 0 0 0)
sterolin 2 [Homo sapiens]	0.00640834	10.0746	75630	11967971	3 (1 0 0 0 2)
Tissue inhibitor of metalloproteinases, Type-2 [Homo sapiens]	0.00308794	10.0742	20793.2	37181	1 (1 0 0 0 0)
hCG1987639 [Homo sapiens]	0.00810127	10.0725	7961.06	119610022	2 (1 1 0 0 0)
hCG1644369 [Homo sapiens]	0.000659562	10.0716	41333.9	119632257	2 (0 0 1 1 0)
envelope glycoprotein [Human immunodeficiency virus type 1]	0.00954347	10.0714	96768.6	17046569	1 (1 0 0 0 0)
hCG401121 [Homo sapiens]	0.000324601	10.0709	5074.58	119619175	1 (1 0 0 0 0)
dynein, cytoplasmic 1, heavy chain 1, isoform CRA_b [Homo sapiens] [MAS	0.00480015	10.0688	525143	119602166	1 (1 0 0 0 0)
amine oxidase (flavin-containing) [Homo sapiens]	0.00136034	10.0674	58725.2	38202207	1 (1 0 0 0 0)
immunoglobulin heavy chain variable region [Homo sapiens]	0.00736509	10.0672	12719.2	4456518	1 (1 0 0 0 0)
AF250874_1 capsid polyprotein [Human echovirus 1 (strain Bryson)]	0.00439595	10.0669	97574.1	10443876	1 (1 0 0 0 0)
solute carrier family 17 (anion/sugar transporter), member 5 [Homo sapi	0.00789721	10.066	54604.3	6912666	1 (1 0 0 0 0)
fatty acid binding protein 3 [Homo sapiens]	0.00693148	10.0659	14848.7	4758328	1 (1 0 0 0 0)
creatine kinase, mitochondrial 1B precursor [Homo sapiens]	0.000365693	10.0656	47007.3	10334859	1 (1 0 0 0 0)
immunoglobulin heavy chain variable region [Homo sapiens]	0.00974827	10.0647	14806.3	39939661	1 (1 0 0 0 0)
neurogenic differentiation 6 [Homo sapiens]	0.0056589	10.0646	38680.3	27475985	1 (1 0 0 0 0)
nef protein [Human immunodeficiency virus 1]	0.00898117	10.0643	23758.9	37935918	2 (1 0 1 0 0)
gag protein [Human immunodeficiency virus 1]	0.00114852	10.0638	55662.5	119361818	1 (1 0 0 0 0)
envelope protein [Human immunodeficiency virus 1]	0.00136045	10.0636	95988.1	148725775	1 (1 0 0 0 0)
matrix metalloproteinase 7 preproprotein [Homo sapiens]	0.00055066	10.0634	29657.9	4505219	2 (2 0 0 0 0)
polyprotein [Human rhinovirus 39]	0.00714581	10.063	242830	53987042	2 (0 1 0 0 1)
hCG1811433, isoform CRA_a [Homo sapiens]	0.00624452	10.0619	13223.8	119631520	1 (1 0 0 0 0)
unnamed protein product [Homo sapiens]	0.00620592	10.0619	47678.9	28207849	1 (1 0 0 0 0)
A46164 calnexin - human (fragment)	0.00322098	10.0613	40810.6	422774	1 (1 0 0 0 0)
LYSM4_HUMAN LysM and putative peptidoglycan-binding domain-containing protein	0.00139742	10.061	32031.2	74736222	1 (1 0 0 0 0)
nucleophosmin (nucleolar phosphoprotein B23, numatrin), isoform CRA_d [	0.00361543	10.0604	17847.7	119581851	1 (1 0 0 0 0)
hypothetical protein [Homo sapiens]	0.00348863	10.0599	25742.7	68161840	1 (1 0 0 0 0)
hypothetical protein [Homo sapiens]	0.00450107	10.0599	18150.4	21740133	1 (1 0 0 0 0)
A Chain A, Human Centrin 2 Xeroderma Pigmentosum Group C Protein Complex	0.00027602	10.0597	19600.2	99032537	2 (0 1 0 0 1)
envelope glycoprotein [Human immunodeficiency virus type 1]	0.00477929	10.0583	24545.2	2190754	1 (1 0 0 0 0)
S100 calcium-binding protein, beta [Homo sapiens]	0.00688432	10.0574	10706	5454034	1 (1 0 0 0 0)
AF061264_1 brain my025 [Homo sapiens]	0.00925428	10.0573	20186.6	12001992	1 (1 0 0 0 0)
PRRT3 protein [Homo sapiens]	0.00590105	10.057	61853.9	71296793	1 (1 0 0 0 0)
unnamed protein product [Homo sapiens]	0.0034938	10.0558	21244.5	7022776	2 (0 0 1 1 0)
envelope glycoprotein [Human immunodeficiency virus type 1]	0.00264354	10.0544	96674.5	2231606	1 (1 0 0 0 0)
1D-myo-inositol-trisphosphate 3-kinase A [Homo sapiens]	0.000140049	10.0536	50977.1	4504789	1 (1 0 0 0 0)
TRS1 [Human herpesvirus 5 strain AD169]	0.00376457	10.052	83929.1	9625873	1 (1 0 0 0 0)
regulatory factor X3 isoform a [Homo sapiens]	0.00144601	10.0502	79306.8	4506495	1 (1 0 0 0 0)
AF308301_1 serologically defined breast cancer antigen NY-BR-87 [Homo sap	0.00981223	10.048	19520.8	12060853	1 (1 0 0 0 0)
CCDC63 protein [Homo sapiens]	0.00325527	10.0463	31679.5	112180480	1 (1 0 0 0 0)
CDC14C protein [Homo sapiens]	0.00427106	10.0452	55102.9	34192046	1 (1 0 0 0 0)
KIAA0641 protein [Homo sapiens]	0.0027735	10.0449	139875	20521115	1 (1 0 0 0 0)
hCG2008629 [Homo sapiens]	0.00174768	10.0449	26533.1	119592755	1 (1 0 0 0 0)
neurotensin receptor 1 [Homo sapiens]	0.00266725	10.0447	46228.9	110611243	1 (1 0 0 0 0)
AF208851_1 BM-009 [Homo sapiens]	0.00150719	10.0428	25188.6	7582290	1 (1 0 0 0 0)
pol protein [Human immunodeficiency virus 1]	0.00138497	10.0412	56911.4	125632934	1 (1 0 0 0 0)
SWI/SNF complex 60 KDa subunit [Homo sapiens]	0.00896224	10.038	49993.8	1549243	1 (1 0 0 0 0)
ABCBB_HUMAN Bile salt export pump (ATP-binding cassette sub-family B member 1	0.00107183	10.0317	146300	12643301	1 (1 0 0 0 0)
S31503 H+/K+-exchanging ATPase (EC 3.6.3.10) ATP1AL1 - human (fragment)	0.000904277	8.15877	10485.2	346261	1 (0 1 0 0 0)
hemoglobin beta chain [Homo sapiens]	9.46798e-12	8.14301	11015.6	66731527	1 (0 1 0 0 0)
neurolysin [Homo sapiens]	0.00424852	8.11681	80599.8	14149738	4 (1 2 1 0 0)
hCG1985816 [Homo sapiens]	0.0041777	8.11486	7991.32	119620010	1 (0 1 0 0 0)
B Chain B, Crystal Structure Of Human Hemoglobin E At 1.73 A Resolution	0.000276758	8.11029	15856.3	46014946	1 (0 1 0 0 0)
gp160 [Human immunodeficiency virus 1]	0.00902308	8.1097	96731.7	18996234	1 (0 1 0 0 0)
envelope glycoprotein [Human immunodeficiency virus type 1]	0.00356216	8.10479	8244.29	13774683	1 (0 1 0 0 0)
hCG2030248 [Homo sapiens]	0.00444427	8.10071	20039.5	119567955	1 (0 1 0 0 0)
AF407157_1 envelope glycoprotein [Human immunodeficiency virus type 1] [M	0.00109765	8.09888	97742.2	21616403	1 (0 1 0 0 0)
chordin-like 2, isoform CRA_a [Homo sapiens]	0.000594322	8.09853	11657.7	119595350	1 (0 1 0 0 0)
rho GDP dissociation inhibitor (GDI) [Homo sapiens] [	0.000966996	8.09551	23178.7	36038	1 (0 1 0 0 0)
transmembrane protein 84, isoform CRA_b [Homo sapiens]	0.00741271	8.09491	9662.09	119598240	1 (0 1 0 0 0)
zinc finger protein 336 [Homo sapiens]	0.00305933	8.09234	80440.5	11968150	1 (0 1 0 0 0)
immunoglobulin kappa chain variable region [Homo sapiens]	0.000463345	8.09049	12516.4	77379448	1 (0 1 0 0 0)
envelope glycoprotein [Human immunodeficiency virus 1]	0.00554146	8.09024	14425.4	8920124	1 (0 1 0 0 0)
hCG2007372 [Homo sapiens]	0.00472123	8.08881	13281.6	119629874	1 (0 1 0 0 0)
nebulette sarcomeric isoform [Homo sapiens]	0.00409599	8.0866	116380	5453758	2 (0 2 0 0 0)
leucine rich repeat containing 57, isoform CRA_b [Homo sapiens]	0.00781353	8.08624	17485.4	119612967	1 (0 1 0 0 0)
envelope glycoprotein precursor gp160 [Human immunodeficiency virus 1]	0.000781644	8.08579	96631.5	71794620	3 (0 1 0 2 0)
beta globin chain variant [Homo sapiens]	0.000298887	8.08398	15987.3	26892090	1 (0 1 0 0 0)
immunoglobulin heavy chain variable region [Homo sapiens]	0.000582979	8.08388	13163.3	4837899	1 (0 1 0 0 0)
Kv channel interacting protein 2 transcript variant 9 [Homo sapiens] [M	0.0083424	8.08073	26165.4	114150680	1 (0 1 0 0 0)
neuropeptide Y receptor Y2 [Homo sapiens]	5.77678e-06	8.08061	42703.6	4505447	1 (0 1 0 0 0)
hCG1814009 [Homo sapiens]	0.00547006	8.08034	5229.61	119578230	1 (0 1 0 0 0)
immunoglobulin heavy chain variable region [Homo sapiens]	0.00854811	8.07989	8614.24	5441380	1 (0 1 0 0 0)
2'-5' oligoadenylate binding protein; endoribonuclease [Homo sapiens] [MA	0.00253472	8.07973	45534.6	608723	2 (0 0 0 2 0)
immunoglobulin heavy chain CDR3 region [Homo sapiens]	0.00518891	8.0782	2941.38	4098844	1 (0 1 0 0 0)
hCG2007637, isoform CRA_a [Homo sapiens]	0.00291564	8.07688	34125.9	119629769	2 (0 1 0 1 0)
hypothetical protein DDBDRAFT_0206578 [Dictyostelium discoideum AX4]	0.00314805	8.07373	346629	66823609	1 (0 1 0 0 0)
PO-GA [Homo sapiens]	0.00667779	8.07277	128203	296908	1 (0 1 0 0 0)
unnamed protein product [Homo sapiens]	0.00504049	8.06852	30182	34532462	1 (0 1 0 0 0)
hypothetical protein [Homo sapiens]	0.00134495	8.0677	130978	6807875	1 (0 1 0 0 0)
alkB, alkylation repair homolog 6 isoform 1 [Homo sapiens]	0.00813338	8.06556	17924.3	38570140	2 (0 1 1 0 0)
hCG2036928, isoform CRA_b [Homo sapiens]	0.000873232	8.06521	11252.8	119629008	1 (0 1 0 0 0)
unnamed protein product [Homo sapiens]	0.00900684	8.0623	43196.2	28375587	1 (0 1 0 0 0)
unnamed protein product [Homo sapiens]	0.00399394	8.06196	63376.6	7020422	2 (0 0 1 0 1)
calcium-binding tyrosine phosphorylation-regulated protein isoform d [	0.000904121	8.06147	30033.9	24797110	1 (0 1 0 0 0)
immunoglobulin lambda light chain variable region [Homo sapiens]	0.00133195	8.06063	10838.2	27369044	1 (0 1 0 0 0)
ciliary neurotrophic factor receptor preproprotein [Homo sapiens]	0.00823939	8.06037	40607.5	4502931	1 (0 1 0 0 0)
unnamed protein product [Homo sapiens]	0.00442152	8.05931	21577.6	21755426	2 (0 0 1 0 1)
hypothetical protein [Homo sapiens]	0.000326806	8.05804	75933.3	34366433	1 (0 1 0 0 0)
non-structural protein; Ha [Human astrovirus]	0.00490994	8.05804	10427.6	21069099	1 (0 1 0 0 0)
conserved gene telomeric to alpha globin cluster isoform 1 [Homo s	0.00158399	8.05803	63564.9	116292162	1 (0 1 0 0 0)
unnamed protein product [Homo sapiens]	0.00174618	8.05791	43107.3	47077351	1 (0 1 0 0 0)
AF154671_1 CRB1 [Homo sapiens]	0.00113388	8.05731	151312	6014482	1 (0 1 0 0 0)
KIAA1047 protein [Homo sapiens]	0.00861486	8.05705	259647	29421188	2 (0 0 0 2 0)
A57644 Na+/H+-exchanging protein 2 - human	0.0090942	8.05654	78933.7	2135788	1 (0 1 0 0 0)
hypothetical protein [Homo sapiens]	0.00623795	8.05621	97253	21740279	2 (0 0 0 2 0)
envelope glycoprotein [Human immunodeficiency virus type 2]	0.00771219	8.05619	14685.4	2655119	1 (0 1 0 0 0)
zinc finger protein 42 [Homo sapiens]	0.00707676	8.05615	34779.7	89179323	1 (0 1 0 0 0)
NOL1/NOP2/Sun domain family 4 protein [Homo sapiens]	0.0032454	8.05601	43061.1	40316918	1 (0 1 0 0 0)
envelope polyprotein [Human immunodeficiency virus type 1]	0.00636491	8.05579	11057.7	327643	1 (0 1 0 0 0)
envelope glycoprotein [Human immunodeficiency virus 1]	0.00279298	8.05567	31277.7	99029702	1 (0 1 0 0 0)
pol protein [Human immunodeficiency virus 1]	0.00014666	8.05512	56988.9	116277812	1 (0 1 0 0 0)
AF309431_1 gag protein [Human immunodeficiency virus type 1]	0.00908535	8.05464	14081.9	12239553	1 (0 1 0 0 0)
KIAA1693 protein [Homo sapiens]	0.00528373	8.0542	103449	12697931	1 (0 1 0 0 0)
fiber protein [Human adenovirus C]	0.00728582	8.0535	61880.3	9626185	1 (0 1 0 0 0)
unnamed protein product [Homo sapiens]	0.00892483	8.05348	16024.5	10433112	1 (0 1 0 0 0)
LYAG_HUMAN Lysosomal alpha-glucosidase precursor (Acid maltase) (Aglucosidase a	0.00208515	8.05317	105271	126590	1 (0 1 0 0 0)
unnamed protein product [Homo sapiens]	0.00987163	8.0527	30591.7	14042447	3 (0 0 0 2 1)
envelope glycoprotein [Human immunodeficiency virus 1]	0.00420751	8.05222	56683.4	119874387	1 (0 1 0 0 0)
AF471381_1 Ig heavy chain variable region, VH3 family [Homo sapiens] [MAS	0.00368818	8.0519	12966.5	33319306	2 (0 0 1 0 1)
SPB11_HUMAN Serpin B11	0.0081165	8.05133	44070.5	20140144	1 (0 1 0 0 0)
envelope glycoprotein [Human immunodeficiency virus 1]	0.00846836	8.05063	99571.3	63014585	1 (0 1 0 0 0)
leucine rich repeat containing 20, isoform CRA_e [Homo sapiens]	0.00383845	8.05032	12941.9	119574780	1 (0 1 0 0 0)
CAB2 [Homo sapiens]	0.00421049	8.04979	36254.3	27808402	1 (0 1 0 0 0)
thrombospondin repeat containing 1 isoform 2 [Homo sapiens]	7.01382e-05	8.04815	95072	56788359	1 (0 1 0 0 0)
prostatic binding protein [Homo sapiens]	0.0075092	8.04689	21043.7	4505621	1 (0 1 0 0 0)
envelope glycoprotein [Human immunodeficiency virus type 1]	0.00541401	8.045	19438.8	13506279	1 (0 1 0 0 0)
immunoglobulin heavy chain [Homo sapiens]	0.00847689	8.04467	17891.9	46254075	1 (0 1 0 0 0)
hypothetical protein PY00695 [Plasmodium yoelii yoelii str. 17XNL]	0.00121868	8.0438	80031	82596589	1 (0 1 0 0 0)
human KRIT 1 (Krev interaction trapped/cerebral cavernous malformat	0.00296766	8.04377	82747	71997281	1 (0 1 0 0 0)
unnamed protein product [Homo sapiens]	0.00727329	8.04119	115755	34533183	1 (0 1 0 0 0)
striatin [Homo sapiens]	0.00299173	8.04055	86090.9	2828318	1 (0 1 0 0 0)
AF233648_1 pregnancy-induced hypertension syndrome-related protein [Homo s	0.00698164	8.0404	10979.6	7341265	1 (0 1 0 0 0)
exocyst complex component 7 isoform a [Homo sapiens]	0.000107815	8.04011	78011.5	62241046	1 (0 1 0 0 0)
KIAA0608 protein [Homo sapiens]	0.00223314	8.03909	85475.1	3043740	1 (0 1 0 0 0)
hCG2042692 [Homo sapiens]	0.00139574	8.03616	23600	119571855	1 (0 1 0 0 0)
debranching enzyme homolog 1 [Homo sapiens]	0.0049509	8.03166	61516.3	56549113	1 (0 1 0 0 0)
Bloom syndrome protein [Homo sapiens]	0.00920033	6.09402	158900	4557365	3 (0 0 0 2 1)
AF353325_1 envelope glycoprotein [Human immunodeficiency virus type 1] [M	0.00836993	6.06828	13066.5	13898744	2 (1 0 1 0 0)
CNTP4_HUMAN Contactin-associated protein-like 4 precursor (Cell recognition m	0.00189763	6.06213	145224	17433039	2 (0 0 0 1 1)
MGC31957 protein [Homo sapiens]	0.00244729	6.05165	16334.6	13477163	2 (0 0 0 1 1)
VCLJSP env polyprotein - human foamy virus	0.0060167	6.05102	113422	74720	3 (1 1 1 0 0)
immunoglobulin alpha heavy chain variable region [Homo sapiens]	0.0012097	4.08864	14011.9	62871218	6 (1 3 0 1 1)
hCG2042551 [Homo sapiens]	0.00865384	2.10055	9992.45	119616889	2 (0 1 0 0 1)
flavin containing monooxygenase 1 [Homo sapiens]	0.00520512	2.08446	60271.9	4503755	2 (0 1 0 0 1)

## Sheet: CADASIL_4_RIPA
Description	P-value	Score	MW	Accession	Peptide (Hits)
SPTAN1 protein [Homo sapiens]	3.45605e-08	360.256	282106	31565122	38 (34 3 1 0 0)
unknown [Homo sapiens]	1.39837e-09	310.265	268547	62988842	40 (31 4 2 2 1)
glial fibrillary acidic protein [Homo sapiens]	1.16694e-10	296.223	49849.7	4503979	45 (34 7 1 1 2)
2',3'-cyclic-nucleotide 3'-phosphodiesterase (EC 3.1.4.37)	3.53524e-09	230.304	45070.4	180687	39 (35 1 1 1 1)
neurofilament, medium polypeptide 150kDa [Homo sapiens]	1.30085e-11	208.299	102386	4885513	31 (26 1 1 1 2)
microtubule-associated protein 1B isoform 1 [Homo sapiens]	3.40444e-07	196.237	270452	5174525	24 (16 3 2 2 1)
myelin basic protein isoform 1 [Homo sapiens]	2.92024e-08	164.213	21480	68509930	104 (96 6 1 1 0)
GNAO2_HUMAN Guanine nucleotide-binding protein G(o) subunit alpha 2	4.60964e-10	150.233	40061.1	60416433	35 (32 1 2 0 0)
brain abundant, membrane attached signal protein 1 [Homo sapiens]	1.38988e-10	150.223	22680	30795231	60 (57 2 0 0 1)
G02520 plectin - human	1.2768e-06	150.171	518172	7442004	22 (12 1 3 4 2)
Na+/K+ -ATPase alpha 2 subunit proprotein [Homo sapiens]	6.60223e-12	144.275	112194	4502271	36 (27 3 2 2 2)
Na+/K+ -ATPase alpha 1 subunit isoform a proprotein [Homo sapiens]	2.24841e-12	144.262	112824	21361181	21 (18 1 1 1 0)
unnamed protein product [Homo sapiens]	1.19368e-09	142.229	57919.5	28940	26 (18 3 2 2 1)
I38369 beta-tubulin - human (fragment)	3.20459e-08	128.214	48848.5	2119276	31 (22 5 2 1 1)
neurofilament, light polypeptide 68kDa [Homo sapiens]	4.11833e-07	126.227	61479.3	105990539	21 (16 2 1 1 1)
neural cell adhesion molecule 1 isoform 3 [Homo sapiens]	9.90078e-11	122.298	83718	115529478	19 (18 0 0 0 1)
dihydropyrimidinase-like 2 [Homo sapiens]	5.36818e-09	116.261	62254.7	4503377	18 (15 1 1 0 1)
A Chain A, Crystal Structure Of A DictyosteliumTETRAHYMENA CHIMERA Actin (Mutan	3.91216e-11	116.253	41719.9	7245526	37 (31 4 1 1 0)
ANK2_HUMAN Ankyrin-2 (Brain ankyrin) (Ankyrin-B) (Ankyrin, nonerythroid)	1.13983e-08	114.216	430079	1703310	14 (8 3 0 2 1)
ATP synthase, H+ transporting, mitochondrial F1 complex, alpha subunit	9.05974e-09	110.223	59713.7	4757810	19 (14 1 0 3 1)
proteolipid protein [Rattus norvegicus]	1.13523e-06	100.195	30057.1	13591880	76 (67 3 3 1 2)
Na+,K+ ATPase [Homo sapiens]	7.18622e-10	98.2424	111901	1359715	14 (13 1 0 0 0)
microtubule-associated protein 2 [Homo sapiens]	3.23535e-06	94.1449	199045	1850617	11 (8 1 0 1 1)
Chain , Aldolase A (E.C.4.1.2.13)	3.94333e-07	92.1471	39264.3	229674	11 (8 2 1 0 0)
syntaxin binding protein 1 isoform a [Homo sapiens]	5.09586e-08	90.2082	68692.3	4507297	16 (14 1 0 0 1)
internexin neuronal intermediate filament protein, alpha [Homo sapiens	2.12593e-07	90.1798	55357.5	14249342	15 (6 2 3 3 1)
MACF4_HUMAN Microtubule-actin cross-linking factor 1, isoform 4	0.00525695	88.1082	669743	30316105	15 (7 3 2 2 1)
contactin 1 isoform 1 precursor [Homo sapiens]	1.12559e-05	86.1872	113249	28373117	11 (7 0 1 2 1)
ATRB actin, skeletal muscle - rabbit	2.61232e-06	82.2183	41789.8	71611	27 (20 4 0 2 1)
Na+/K+ -ATPase beta 1 subunit isoform a [Homo sapiens]	3.83264e-08	80.1978	35038.9	4502277	18 (18 0 0 0 0)
MDHM_HUMAN Malate dehydrogenase, mitochondrial precursor	2.5095e-10	78.2783	35508.8	6648067	16 (15 1 0 0 0)
tubulin, beta 4 [Homo sapiens]	5.88418e-14	78.2469	49553.9	21361322	21 (15 4 0 0 2)
clathrin heavy chain 1 [Homo sapiens]	3.87695e-06	78.2229	191492	4758012	10 (7 0 3 0 0)
Nogo-A protein [Homo sapiens]	7.34949e-07	78.2136	129861	9408096	10 (7 1 1 1 0)
SHPS1_HUMAN Tyrosine-protein phosphatase non-receptor type substrate 1 precur	1.18399e-09	78.1778	54778.7	29427656	10 (9 1 0 0 0)
tyrosine 3/tryptophan 5 -monooxygenase activation protein, zeta polypep	7.59065e-09	74.1987	27727.7	4507953	10 (9 0 0 1 0)
aconitase 2 precursor [Homo sapiens]	2.82032e-09	72.2257	85372	4501867	9 (7 1 0 1 0)
KIAA0987 protein [Homo sapiens]	2.24303e-07	72.1809	123629	4589618	10 (5 1 1 1 2)
N Chain N, Mutant Monomer Of Recombinant Human Hexokinase Type I Complexed With	3.62083e-05	72.1525	102383	7245424	14 (6 1 1 0 6)
tyrosine 3/tryptophan 5 -monooxygenase activation protein, epsilon poly	5.41131e-07	70.1826	29155.4	5803225	12 (10 1 0 0 1)
chaperonin [Homo sapiens]	3.74888e-08	70.1781	61016.5	31542947	10 (6 0 2 1 1)
tubulin alpha 6 [Homo sapiens]	1.26434e-08	68.2306	49863.5	14389309	14 (12 1 0 1 0)
AT2B4_HUMAN Plasma membrane calcium-transporting ATPase 4 (PMCA4) (Plasma mem	2.65405e-07	68.2034	137833	14286105	11 (6 3 1 0 1)
ATP synthase, H+ transporting, mitochondrial F0 complex, subunit d isof	2.17984e-11	68.1788	18479.5	5453559	8 (7 1 0 0 0)
growth associated protein 43 [Homo sapiens]	4.14315e-06	68.177	24787.9	4503911	12 (11 1 0 0 0)
MAP1A_HUMAN Microtubule-associated protein 1A (MAP 1A) (Proliferation-related	0.000103389	64.0943	306342	51338794	7 (6 0 0 1 0)
guanine nucleotide-binding protein, beta-2 subunit [Mus musculus]	3.66655e-08	62.1878	37307.1	13937391	10 (9 0 0 0 1)
H4 histone family, member A [Homo sapiens]	4.2968e-06	62.1396	11360.4	4504301	9 (7 0 2 0 0)
triosephosphate isomerase 1 [Homo sapiens]	1.23904e-09	60.1802	26652.7	4507645	9 (9 0 0 0 0)
B Chain B, T-To-T(High) Quaternary Transitions In Human Hemoglobin: Deshis146b	9.2328e-09	58.233	15720.2	61679604	14 (9 5 0 0 0)
actinin, alpha 1 [Homo sapiens]	1.88317e-05	58.2049	102993	4501891	7 (5 0 1 0 1)
KIAA1087 protein [Homo sapiens]	1.81389e-07	58.194	103374	5689511	7 (3 2 2 0 0)
KIAA0300 [Homo sapiens]	0.00319724	58.1035	302273	29421166	10 (2 3 1 2 2)
mitochondrial ATP synthase, O subunit precursor [Homo sapiens]	3.03665e-05	56.1637	23262.7	4502303	9 (6 0 2 1 0)
ras-related C3 botulinum toxin substrate 1 isoform Rac1 [Homo sapiens]	4.40523e-07	56.152	21436.2	9845511	6 (4 2 0 0 0)
synaptotagmin I [Homo sapiens]	1.75451e-10	52.1885	47542.8	5032139	8 (6 1 0 0 1)
oxysterol-binding protein-like protein 6 isoform a [Homo sapiens]	0.00897396	52.1063	106239	14210532	6 (4 1 0 1 0)
CENPF_HUMAN Centromere protein F (Kinetochore protein CENP-F) (Mitosin) (AH an	0.00156079	52.0862	367366	1345731	13 (4 1 2 1 5)
glyceraldehyde-3-phosphate dehydrogenase [Homo sapiens]	1.11022e-15	50.3412	36030.4	7669492	17 (17 0 0 0 0)
glycoprotein M6A isoform 1 [Homo sapiens]	7.40554e-07	50.2376	31188.4	14149619	9 (6 1 1 0 1)
myelin oligodendrocyte glycoprotein [Homo sapiens] [M	5.99173e-09	50.2037	28175	793839	11 (10 0 1 0 0)
voltage-dependent anion channel 1 [Homo sapiens]	3.4402e-05	50.1936	30753.6	4507879	7 (7 0 0 0 0)
prostatic binding protein [Homo sapiens]	1.06213e-07	50.181	21043.7	4505621	6 (6 0 0 0 0)
neural cell adhesion molecule 1, isoform CRA_a [Homo sapiens]	1.05045e-06	50.1577	119374	119587605	5 (5 0 0 0 0)
solute carrier family 25 (mitochondrial carrier; adenine nucleotide tr	3.56972e-09	50.1521	33043.2	55749577	7 (7 0 0 0 0)
reticulon 1 isoform A [Homo sapiens]	2.15666e-07	50.1392	83566.2	10863935	5 (5 0 0 0 0)
PEPL_HUMAN Periplakin (195 kDa cornified envelope precursor protein) (190 kDa	0.00688615	50.1033	204525	14195005	9 (1 2 2 2 2)
tubulin, beta, 4 [Homo sapiens]	6.71924e-09	48.2469	50400.3	50592996	8 (2 5 0 1 0)
A Chain A, Crystal Structure Of Caenorhabditis Elegans Mg-Atp Actin Complexed	1.11903e-08	48.2051	41637.7	14278147	8 (6 2 0 0 0)
alpha-spectrin [Homo sapiens]	1.13444e-07	48.1999	43790.8	829111	5 (4 1 0 0 0)
tenascin-R [Homo sapiens]	1.35956e-07	48.177	149479	1617316	7 (4 1 1 1 0)
G01650 malate dehydrogenase (EC 1.1.1.37), cytosolic - human [M	1.01248e-05	48.1527	36392	7431153	5 (4 1 0 0 0)
ubiquinol-cytochrome c reductase core protein II [Homo sapiens]	0.000670497	48.1257	48412.9	50592988	6 (4 0 1 0 1)
novel protein similar to a human protein associated with Myc [Danio rer	0.00916975	48.0749	335699	26788088	9 (2 2 1 1 3)
unnamed protein product [Homo sapiens]	4.09002e-08	46.1904	35738.8	32486	5 (4 0 1 0 0)
AF-6 [Homo sapiens]	0.00135276	46.1023	181786	3452574	13 (2 2 6 2 1)
H+-ATP synthase subunit b [Homo sapiens]	4.15812e-06	44.1607	28876.3	509291	6 (5 0 0 1 0)
novel protein similar to human obscurin, cytoskeletal calmodulin and t	0.0045704	44.1057	180129	148880026	6 (2 2 1 0 1)
synaptosomal-associated protein 25 isoform SNAP25A [Homo sapiens]	9.47301e-08	42.226	23321.2	18765733	8 (7 0 0 0 1)
heat shock 70kDa protein 5 [Homo sapiens]	7.04415e-09	42.1962	72288.5	16507237	6 (2 1 1 2 0)
MYH10_HUMAN Myosin-10 (Myosin heavy chain 10) (Myosin heavy chain, nonmuscle I	3.81055e-05	42.1429	228797	1346640	5 (3 1 0 1 0)
heat shock 90kDa protein 1, beta [Homo sapiens]	1.74622e-05	42.1409	83212.2	20149594	6 (2 2 0 1 1)
A40671 dynamin, internal form 1, long C-terminal form - human [M	3.25152e-08	42.14	97201	539580	5 (2 2 1 0 0)
vacuolar H+ATPase B2 [Homo sapiens]	0.00250794	42.1248	56465	19913428	6 (2 2 0 1 1)
dedicator of cytokinesis 4 [Homo sapiens]	0.000411925	42.1044	225076	51095134	5 (3 0 2 0 0)
ZEP1_HUMAN Zinc finger protein 40 (Human immunodeficiency virus type I enhancer	0.000405842	42.0915	297034	141697	6 (3 0 1 1 1)
ubiquitin carboxyl-terminal esterase L1 (ubiquitin thiolesterase) [Hom	4.36101e-07	40.2495	24808.5	21361091	5 (5 0 0 0 0)
breast carcinoma amplified sequence 1 [Homo sapiens]	6.91677e-08	40.2315	61681.5	4502373	4 (4 0 0 0 0)
guanine nucleotide-binding protein, beta-1 subunit [Mus musculus]	8.71553e-10	40.2289	37353	6680045	10 (9 1 0 0 0)
R Chain R, Twinning In Crystals Of Human Skeletal Muscle D- Glyceraldehyde-3-Pho	8.06639e-10	40.2055	35853.3	230867	10 (5 3 0 0 2)
RAB3A, member RAS oncogene family [Homo sapiens]	1.14697e-06	40.1949	24968.1	4506367	5 (5 0 0 0 0)
visinin-like 1 [Mus musculus]	8.42744e-09	40.1926	22128	6755983	5 (5 0 0 0 0)
B Chain B, X-Ray Crystal Structure Of Human Galectin-1	1.14029e-10	40.1803	14575.2	42542978	4 (4 0 0 0 0)
myristoylated alanine-rich protein kinase C substrate [Homo sapiens]	3.4084e-05	40.1752	31525.9	11125772	10 (5 3 0 1 1)
brain creatine kinase [Homo sapiens]	5.25518e-09	40.1749	42617.4	21536286	6 (6 0 0 0 0)
unnamed protein product [Homo sapiens]	1.11821e-05	40.1689	49811	10433717	7 (1 4 2 0 0)
SV2A_HUMAN Synaptic vesicle glycoprotein 2A	0.000223049	40.1432	82642.1	74749878	4 (4 0 0 0 0)
AT12A_HUMAN Potassium-transporting ATPase alpha chain 2 (Proton pump) (Non-ga	1.29571e-06	40.1245	115825	20141250	5 (5 0 0 0 0)
Golgi autoantigen, golgin subfamily a, 3 [Homo sapiens]	0.00156255	40.0972	167252	30089940	7 (1 2 1 1 2)
synapsin I isoform Ia [Homo sapiens]	1.13992e-07	38.2089	74065.8	19924099	7 (4 1 1 1 0)
enolase 2 [Homo sapiens]	1.34493e-09	38.2016	47239.1	5803011	6 (3 1 2 0 0)
tyrosine 3-monooxygenase/tryptophan 5-monooxygenase activation protein,	0.00434711	38.165	28064.8	4507949	7 (4 3 0 0 0)
excitatory amino acid transporter 2 [Homo sapiens]	8.02289e-06	38.1624	62063.9	40254478	5 (4 1 0 0 0)
glutamate transporter [Homo sapiens]	0.000101042	38.1533	61664.6	488752	7 (2 1 1 2 1)
alpha-synuclein isoform NACP140 [Homo sapiens]	0.000240418	38.1315	14451.2	4507109	4 (3 1 0 0 0)
enolase 1 [Homo sapiens]	9.17542e-07	38.1303	47139.4	4503571	5 (4 1 0 0 0)
AF293026_1 steroid receptor RNA activator isoform 3 [Homo sapiens]	0.000840598	38.0875	25827.1	9930614	6 (1 2 0 3 0)
GDP dissociation inhibitor 1 [Homo sapiens]	0.00457262	36.1992	50550.2	4503971	4 (3 0 1 0 0)
plasma membrane calcium ATPase 2 isoform 1 [Homo sapiens]	3.45391e-05	36.1727	136790	48255951	4 (3 0 1 0 0)
A Chain A, Human Heart L-Lactate Dehydrogenase H Chain, Ternary Complex With N	5.11722e-06	36.142	36484.1	13786847	4 (2 2 0 0 0)
KIAA0319 [Homo sapiens]	0.00157368	36.0706	117689	134304840	5 (1 2 1 1 0)
VDAC2 [Homo sapiens]	1.03237e-10	34.2354	30393	48146045	6 (5 0 0 1 0)
KIAA0908 protein [Homo sapiens]	0.0026509	34.1104	56734.9	4240305	4 (3 0 0 1 0)
HSP70-HOM [Homo sapiens]	0.000262443	34.0986	70361.4	4529894	5 (3 1 1 0 0)
DNM3A_HUMAN DNA (cytosine-5)-methyltransferase 3A (Dnmt3a) (DNA methyltransfe	0.00676159	34.0892	101494	20532391	5 (2 1 0 1 1)
sirtuin 2 isoform 1 [Homo sapiens]	2.40677e-05	32.1731	43154.5	13775600	4 (2 1 0 1 0)
hypothetical protein [Homo sapiens]	0.000171784	32.1633	110722	52545742	4 (3 0 0 0 1)
hypothetical protein [Homo sapiens]	0.00119191	32.1411	47524.3	21739836	5 (2 1 0 0 2)
KIAA0284 protein [Homo sapiens]	0.00493313	32.1327	169593	71891774	5 (2 0 1 1 1)
SPTB1_HUMAN Spectrin beta chain, erythrocyte (Beta-I spectrin)	0.00023216	32.128	246168	134798	4 (2 1 0 1 0)
GNNYHB genome polyprotein - human hepatitis A virus (strain MBB)	0.00576144	32.1243	251251	74447	6 (2 0 2 1 1)
PAM COOH-terminal interactor protein 1 [Homo sapiens]	0.000314169	32.113	50023.3	3560563	5 (1 1 1 2 0)
transcriptional regulator ICP4 [Human herpesvirus 3]	0.00719856	32.1033	139912	9625936	6 (3 1 1 1 0)
oral-facial-digital syndrome 1 [Homo sapiens]	0.00122074	32.0861	116599	4503179	5 (3 0 1 0 1)
Raichu404X [Homo sapiens]	0.00349981	32.0812	84962	14595132	4 (2 1 0 1 0)
SMC4 structural maintenance of chromosomes 4-like 1 [Homo sapiens]	0.00635622	32.08	147090	50658063	5 (1 1 2 0 1)
tubulin, alpha 1B [Mus musculus]	1.12865e-09	30.2801	50119.6	34740335	10 (10 0 0 0 0)
vesicle-associated membrane protein 2 (synaptobrevin 2) [Homo sapiens]	5.39679e-12	30.2703	12640.7	7657675	8 (7 0 0 0 1)
heat shock protein 90kDa alpha (cytosolic), class A member 1 isoform 2	3.41884e-09	30.2448	84620.7	40254816	3 (3 0 0 0 0)
calmodulin [Homo sapiens]	1.32128e-11	30.2	17152	825635	5 (5 0 0 0 0)
SYN2_HUMAN Synapsin-2 (Synapsin II)	4.71971e-06	30.1906	62928.8	6686022	4 (4 0 0 0 0)
hypothetical protein [Homo sapiens]	2.37419e-07	30.1714	18150.4	21740133	4 (4 0 0 0 0)
pyruvate kinase 3 isoform 1 [Homo sapiens]	1.49224e-08	30.1637	57900.2	33286418	4 (4 0 0 0 0)
AT1A4_HUMAN Sodium/potassium-transporting ATPase alpha-4 chain (Sodium pump 4	0.00851767	30.1425	114093	23830899	6 (3 2 0 1 0)
cofilin 1 (non-muscle) [Homo sapiens]	1.63175e-06	30.141	18490.7	5031635	3 (3 0 0 0 0)
MARCKS-like 1 [Homo sapiens]	0.000780707	30.1289	19517.2	13491174	3 (3 0 0 0 0)
glycoprotein M6B isoform 3 [Homo sapiens]	0.000472784	30.116	28969.2	24307895	3 (3 0 0 0 0)
peroxiredoxin 5 precursor, isoform a [Homo sapiens]	0.00151627	30.1111	22012.5	6912238	3 (3 0 0 0 0)
AF370877_1 Staphylococcus hyicus lipase precursor/human growth hormone fu	0.00726483	30.0997	50122.9	33341802	3 (3 0 0 0 0)
kalirin, RhoGEF kinase isoform 2 [Homo sapiens]	0.00819494	30.095	192108	4504335	6 (3 2 0 1 0)
solute carrier family 23 (nucleobase transporters), member 2 [Homo sap	0.00104555	30.0921	70291.5	40316845	8 (3 4 1 0 0)
KIAA1262 protein [Homo sapiens]	0.00909221	30.0865	156482	6330957	4 (1 2 0 1 0)
AT2C2_HUMAN Calcium-transporting ATPase type 2C member 2 (ATPase 2C2)	0.0015268	30.0659	104969	19924283	5 (1 0 2 2 0)
kinesin family member 15 [Homo sapiens]	0.00554046	30.06	160060	9910266	4 (1 1 2 0 0)
tyrosine 3/tryptophan 5 -monooxygenase activation protein, theta polype	1.13038e-09	28.2112	27746.8	5803227	3 (2 1 0 0 0)
CD9 antigen [Homo sapiens]	7.99269e-05	28.1738	25399	4502693	5 (4 1 0 0 0)
Kruppel-type zinc finger [Homo sapiens]	0.00886666	28.1382	39666.1	5730196	4 (2 1 0 1 0)
solute carrier family 17, member 7 [Homo sapiens]	0.00193869	28.1285	61573.3	9945322	4 (3 1 0 0 0)
armadillo repeat containing, X-linked 4, isoform CRA_a [Homo sapiens] [	0.00676911	28.1276	246154	119623273	6 (1 1 0 1 3)
solute carrier family 25, member 5 [Homo sapiens]	2.04378e-05	28.1269	32874.2	4502099	4 (2 2 0 0 0)
cell cycle exit and neuronal differentiation 1 [Homo sapiens]	0.00081788	28.1266	14944.8	30795225	7 (4 2 1 0 0)
PTPRF interacting protein alpha 3 [Homo sapiens]	0.0023865	28.1111	133414	32189362	3 (2 1 0 0 0)
hypothetical protein LOC55345 [Homo sapiens]	0.00942197	28.108	119314	38016156	3 (2 1 0 0 0)
laminin, beta 4 [Homo sapiens]	0.00663684	28.1019	193412	143770880	7 (1 1 2 1 2)
cyclin-dependent kinase-like 5 [Homo sapiens]	0.00168902	28.0892	115466	4507281	5 (0 1 2 2 0)
prolyl 4-hydroxylase, beta subunit precursor [Homo sapiens]	0.00478366	28.0874	57080.8	20070125	5 (2 0 0 1 2)
KIAA1379 protein [Homo sapiens]	1.50799e-08	26.2776	52337.5	20521900	4 (1 0 2 1 0)
EAA1_HUMAN Excitatory amino acid transporter 1 (Solute carrier family 1 member	4.38712e-07	26.2296	59533.8	1169458	4 (1 0 2 1 0)
signal-regulatory protein alpha precursor [Homo sapiens]	0.000515314	26.1684	54932.9	18426911	4 (2 0 0 1 1)
proteoglycan PG-M(V3) [Homo sapiens]	1.21734e-08	26.1639	74200.6	1008913	3 (2 0 1 0 0)
WMBEHQ UL5 protein - human herpesvirus 2 (strain HG52) (fragment)	0.000703189	26.144	88093.8	74001	17 (1 11 2 2 1)
phosphatidylinositol-4-phosphate 5-kinase type II beta [Homo sapiens]	0.00389652	26.1389	47347.8	4505819	3 (1 2 0 0 0)
adenylyl cyclase-associated protein [Homo sapiens]	4.0903e-05	26.1282	51640.7	5453595	4 (3 0 1 0 0)
clusterin isoform 2 [Homo sapiens]	0.00314035	26.1104	52461.1	42740907	4 (1 1 1 0 1)
heterogeneous nuclear ribonucleoprotein K [Mus musculus]	0.00384186	26.1041	50944.4	13384620	3 (2 0 1 0 0)
cytochrome P450, family 24 precursor [Homo sapiens]	0.000438543	26.0973	58837.6	55770850	4 (1 0 2 1 0)
unnamed protein product [Homo sapiens]	7.47023e-05	26.0926	37237.2	16552323	4 (2 0 1 0 1)
NCAM2_HUMAN Neural cell adhesion molecule 2 precursor (N-CAM 2)	0.000628193	26.0917	92874.3	3334268	3 (2 0 1 0 0)
A Chain A, Crystal Structure Of Human G[alpha]i1 Bound To The Goloco Motif Of	0.000118474	26.0872	37087.7	21465862	4 (2 1 1 0 0)
hCG2043519 [Homo sapiens]	0.00651414	26.0782	30014.1	119628824	3 (2 0 1 0 0)
KIAA0594 protein [Homo sapiens]	0.000572069	26.0744	131008	20521095	4 (0 2 1 1 0)
platelet/endothelial cell adhesion molecule (CD31 antigen) [Homo sapi	0.00724785	26.0732	82483.9	110347451	3 (2 0 1 0 0)
CNGB3_HUMAN Cyclic nucleotide-gated cation channel beta 3 (CNG channel beta 3	0.00108962	26.0697	92191.6	48474982	3 (2 0 1 0 0)
piwi-like 2 [Homo sapiens]	0.00734391	26.0693	109778	24431985	7 (1 0 2 1 3)
PHD finger protein 16 [Homo sapiens]	0.00279039	26.0643	93748.1	7662006	3 (2 0 1 0 0)
adducin 1 (alpha) isoform a [Homo sapiens]	2.52337e-09	24.2015	80904.8	29826319	3 (2 0 0 1 0)
STX1B_HUMAN Syntaxin-1B1 (Syntaxin 1B)	3.03094e-09	24.1956	33410.1	2501085	6 (5 0 0 1 0)
collapsin response mediator protein 1 isoform 2 [Homo sapiens]	1.87456e-07	24.1671	62144.8	4503051	5 (3 1 0 1 0)
SIRP-beta1 [Homo sapiens]	0.000169745	24.1662	43227	2052058	3 (2 0 0 1 0)
hCG1790832 [Homo sapiens]	3.72504e-08	24.1467	60824.2	119621250	5 (0 1 1 2 1)
tubulin, beta 2 [Homo sapiens]	2.65972e-05	24.1255	49875	4507729	6 (4 1 1 0 0)
hCG2032867 [Homo sapiens]	0.000343594	24.1	33595.4	119588150	4 (1 2 1 0 0)
tubulin, alpha-like 3 [Homo sapiens]	0.000122695	24.0916	49876.8	13376181	3 (2 0 0 1 0)
breast cancer antiestrogen resistance 3 [Homo sapiens]	0.00651782	24.0904	92506.8	4502371	3 (2 0 0 1 0)
tektin 1 [Homo sapiens]	0.00767467	24.0883	48253.2	16753231	5 (2 0 0 1 2)
KIAA1024 protein [Homo sapiens]	0.00752325	24.0856	103041	20521732	5 (1 1 0 2 1)
DHPR_HUMAN Dihydropteridine reductase (HDHPR) (Quinoid dihydropteridine redu	0.00681363	24.0803	25773	118572639	3 (2 0 0 1 0)
core 1 synthase, glycoprotein-N-acetylgalactosamine 3-beta-galactosyltr	0.00355847	24.065	42175.8	9910144	3 (1 1 1 0 0)
UL32 [Human herpesvirus 5 strain AD169]	0.00850923	24.0633	112620	9625717	9 (3 2 3 0 1)
heat shock 70kDa protein 8 isoform 2 [Homo sapiens]	1.10434e-06	22.2589	53484.5	24234686	5 (4 0 0 0 1)
heat shock 70kDa protein 9B precursor [Homo sapiens]	8.86153e-09	22.2428	73634.8	24234688	3 (1 1 0 1 0)
tyrosine 3-monooxygenase/tryptophan 5-monooxygenase activation protein,	1.85246e-08	22.1947	28284.9	9507245	5 (3 1 0 0 1)
synaptophysin [Homo sapiens]	1.48142e-06	22.1931	32083.5	899301	4 (2 0 2 0 0)
heat shock 70kDa protein 2 [Homo sapiens]	1.42784e-08	22.1792	69978	13676857	3 (2 0 0 0 1)
ubiquinol-cytochrome c reductase binding protein [Homo sapiens]	4.19116e-08	22.1763	13522	5454152	4 (2 1 0 0 1)
translocase of outer mitochondrial membrane 70 homolog A [Homo sapiens	0.000561815	22.1581	67412.2	54607135	4 (3 0 0 0 1)
EHD3_HUMAN EH domain-containing protein 3	8.96086e-05	22.1567	61857.2	18203332	3 (2 0 0 0 1)
S-phase kinase-associated protein 1A isoform b [Homo sapiens]	0.000356165	22.1438	18646.2	25777713	7 (1 3 1 1 1)
tumor rejection antigen (gp96) 1 [Homo sapiens]	0.00506624	22.13	92411.2	4507677	3 (1 1 0 1 0)
unnamed protein product [Homo sapiens]	0.000992918	22.1159	30591.7	14042447	3 (2 0 0 0 1)
chaperonin containing TCP1, subunit 7 isoform a [Homo sapiens]	0.000191386	22.1074	59329	5453607	3 (2 0 0 0 1)
zinc finger, FYVE domain containing 21 [Homo sapiens]	0.00548361	22.1005	26488.2	13129054	5 (1 2 0 2 0)
ZNF91_HUMAN Zinc finger protein 91 (Zinc finger protein HTF10) (HPF7)	0.00370136	22.0961	137137	549839	3 (1 0 2 0 0)
beta-1,4-mannosyltransferase [Homo sapiens]	0.00617232	22.0902	52484	41350216	3 (2 0 0 0 1)
dopa decarboxylase (aromatic L-amino acid decarboxylase) [Homo sapiens]	0.00926995	22.082	53859.4	4503281	6 (0 3 2 0 1)
hyaluronan-mediated motility receptor isoform a [Homo sapiens]	0.00155586	22.0793	83979.7	7108349	3 (2 0 0 0 1)
ring finger protein 8 isoform 1 [Homo sapiens]	0.00876177	22.0764	55482.1	4504867	4 (0 0 3 1 0)
fibroblast growth factor binding protein 2 [Homo sapiens]	0.00609552	22.0757	24565.2	13994345	3 (0 2 1 0 0)
KIAA1022 protein [Homo sapiens]	0.000343711	22.0711	121486	5689381	5 (0 1 1 1 2)
GOGA6_HUMAN Golgin subfamily A member 6 (Golgin linked to PML) (Golgin-like p	0.0088584	22.0681	79866.7	32469788	3 (1 1 0 1 0)
BMX non-receptor tyrosine kinase [Homo sapiens]	0.00600244	22.0667	77961	4502435	3 (1 0 2 0 0)
KIAA1202 protein [Homo sapiens]	0.00169294	22.0653	165847	6330422	3 (1 1 0 1 0)
FLJ00140 protein [Homo sapiens]	0.000385061	22.0652	64676	18676486	4 (1 0 1 1 1)
ERN1_HUMAN Serine/threonine-protein kinase/endoribonuclease IRE1 precursor (I	0.00093697	22.0569	109618	51315812	4 (1 1 0 0 2)
KIAA1878 protein [Homo sapiens]	1.95495e-08	20.2677	48892	14017973	2 (2 0 0 0 0)
unnamed protein product [Homo sapiens]	4.68015e-11	20.2225	40203.1	22760099	2 (2 0 0 0 0)
annexin 5 [Homo sapiens]	1.74655e-09	20.2169	35914.4	4502107	2 (2 0 0 0 0)
peroxiredoxin 2 isoform a [Homo sapiens]	2.43953e-08	20.2089	21878.2	32189392	3 (3 0 0 0 0)
amine oxidase (flavin-containing) [Homo sapiens]	2.52125e-09	20.2084	58725.2	38202207	2 (2 0 0 0 0)
IMMT_HUMAN Mitochondrial inner membrane protein (Mitofilin) (p87/89) (Prolife	2.53023e-07	20.2071	83626.5	29427676	2 (2 0 0 0 0)
delta globin [Homo sapiens]	1.74527e-12	20.2062	16045.3	4504351	3 (3 0 0 0 0)
ATP synthase, H+ transporting, mitochondrial F1 complex, beta subunit	2.57252e-07	20.2061	56524.7	32189394	4 (4 0 0 0 0)
syntaxin 1B2 [Rattus norvegicus]	2.66958e-07	20.2045	33223.8	6981600	5 (4 1 0 0 0)
COX41_PANTR Cytochrome c oxidase subunit 4 isoform 1 (Cytochrome c oxidase sub	7.96807e-12	20.2037	16851.6	5921895	2 (2 0 0 0 0)
DHSA_HUMAN Succinate dehydrogenase [ubiquinone] flavoprotein subunit, mitochon	2.89623e-06	20.1908	72645.4	1169337	2 (2 0 0 0 0)
cell adhesion molecule 3 [Homo sapiens]	1.07024e-07	20.1908	46991.5	11056046	2 (2 0 0 0 0)
guanine nucleotide binding protein (G protein), gamma 2 subunit [Mus mu	1.16876e-07	20.1887	7845.03	6754020	2 (2 0 0 0 0)
limbic system-associated membrane protein [Homo sapiens]	0.000455533	20.1842	37370.2	45594240	2 (2 0 0 0 0)
L1 cell adhesion molecule isoform 1 precursor [Homo sapiens]	1.2009e-08	20.1836	139915	4557707	2 (2 0 0 0 0)
B46091 H+-exporting ATPase (EC 3.6.3.6) chain A, vacuolar (VA68 type) - human	2.72381e-07	20.1825	68204.5	1082432	2 (2 0 0 0 0)
similar to Chain , Heat-Shock Cognate 70kd Protein (44kd Atpase N-Termi	2.25285e-05	20.1781	25582.3	51095055	2 (2 0 0 0 0)
beta actin [Homo sapiens]	1.72126e-09	20.1749	41709.7	4501885	3 (3 0 0 0 0)
ATP synthase, H+ transporting, mitochondrial F0 complex, subunit F6 is	4.70712e-08	20.1701	12579.6	18644883	2 (2 0 0 0 0)
adducin 3 (gamma) isoform a [Homo sapiens]	0.000397221	20.168	79105.2	9943848	4 (1 0 1 0 2)
Thy-1 cell surface antigen [Homo sapiens]	0.00143217	20.1614	17923.3	19923362	4 (4 0 0 0 0)
apolipoprotein D precursor [Homo sapiens]	0.000263419	20.1582	21261.8	4502163	3 (3 0 0 0 0)
QRHUT2 microtubule-associated protein tau, fetal (clone p18) - human	0.00106599	20.1569	32924.3	71558	2 (2 0 0 0 0)
guanine nucleotide binding protein (G protein), alpha inhibiting activi	1.52121e-07	20.1541	40425.1	4504041	3 (1 0 1 1 0)
Chain , Human Serum Albumin In A Complex With Myristic Acid And Tri-Iodobenz	1.59661e-05	20.1521	65992.9	4389275	2 (2 0 0 0 0)
proprotein convertase subtilisin/kexin type 1 inhibitor precursor [Homo	2.13572e-06	20.151	27355.8	7019519	3 (3 0 0 0 0)
NIPS1_HUMAN Protein NipSnap1	6.05787e-06	20.1508	33288.8	17380144	2 (2 0 0 0 0)
guanine nucleotide binding protein (G protein), gamma 3 subunit [Mus mu	6.09892e-08	20.1492	8299.16	6754022	5 (5 0 0 0 0)
adducin 2 isoform a [Homo sapiens]	7.7856e-07	20.1431	80803.4	9257192	3 (1 0 1 1 0)
cytochrome c oxidase subunit Vb precursor [Homo sapiens]	5.55136e-05	20.1427	13686.9	17017988	2 (2 0 0 0 0)
phosphoglycerate mutase 2 (muscle) [Homo sapiens] [M	4.2398e-06	20.1376	28201.4	51094513	2 (2 0 0 0 0)
DREB_HUMAN Drebrin (Developmentally-regulated brain protein)	0.000248409	20.1349	71381.6	2498313	3 (1 1 0 0 1)
enoyl-CoA hydratase/3-hydroxyacyl-CoA dehydrogenase alpha-subunit of trif	1.76587e-05	20.134	82906.9	862457	4 (2 1 0 0 1)
connexin 43 [Homo sapiens]	1.71561e-07	20.1276	42980.9	4504001	2 (2 0 0 0 0)
N-ethylmaleimide sensitive fusion protein attachment protein beta [Mus	0.000106273	20.1247	33535.5	29789104	3 (2 1 0 0 0)
ATPase, H+ transporting, lysosomal 50/57kDa, V1 subunit H isoform 2 [H	4.88905e-06	20.1219	55847.1	47717102	2 (2 0 0 0 0)
Na+/K+ -ATPase alpha 3 subunit [Homo sapiens]	0.00203933	20.1128	111677	22748667	2 (2 0 0 0 0)
CCDC46 protein [Homo sapiens]	0.00965973	20.1117	55145.1	34192926	4 (0 2 2 0 0)
heat shock 10kDa protein 1 (chaperonin 10) [Homo sapiens]	0.00934422	20.1116	10924.9	4504523	2 (2 0 0 0 0)
KRHU2 keratin 1, type II, cytoskeletal - human	9.92723e-06	20.1106	65454.4	7428712	3 (2 1 0 0 0)
BORF2 [Human herpesvirus 4 type 1]	0.00121479	20.1094	92970.9	82503213	4 (1 1 1 0 1)
single-stranded DNA-binding protein [Human herpesvirus 3]	0.000145596	20.1081	132057	9625904	3 (1 1 0 0 1)
phospholemman precursor [Homo sapiens]	0.000672987	20.1059	10434.5	11612670	2 (2 0 0 0 0)
GAK13_HUMAN HERV-K_1p13.3 provirus ancestral Gag polyprotein (Gag polyprotein	0.00796948	20.1019	18369.2	50400280	3 (3 0 0 0 0)
unnamed protein product [Homo sapiens]	0.00186576	20.1	59761.1	7023594	3 (0 2 0 1 0)
CD1A_HUMAN T-cell surface glycoprotein CD1a precursor (CD1a antigen) (T-cell su	0.00258935	20.0966	37148.8	115961	2 (2 0 0 0 0)
unnamed protein product [Homo sapiens]	0.0030278	20.0952	72721	21754789	4 (0 0 2 2 0)
hCG2045126 [Homo sapiens]	0.00246472	20.0951	11289.6	119581988	2 (2 0 0 0 0)
vif protein [Human immunodeficiency virus 1]	0.000334186	20.0948	22400.7	73625110	3 (2 1 0 0 0)
unnamed protein product [Homo sapiens]	0.00437183	20.0883	115948	21749863	6 (1 2 1 0 2)
hypothetical protein [Homo sapiens]	0.00270492	20.0871	25742.7	68161840	3 (0 2 0 1 0)
bromodomain adjacent to zinc finger domain 2B [Homo sapiens]	0.00133847	20.0865	220727	6683500	3 (1 0 1 1 0)
hCG2041603 [Homo sapiens]	0.00217565	20.0832	67903.1	119574203	3 (1 0 1 1 0)
G protein-coupled receptor 128 [Homo sapiens]	0.0081667	20.0805	88852.8	14249454	2 (2 0 0 0 0)
pp-GalNAc-transferase 17 [Homo sapiens]	0.00478403	20.0802	67545.5	86475571	3 (1 0 1 1 0)
peptidylprolyl isomerase A [Mus musculus]	0.00452788	20.0741	17959.8	6679439	2 (2 0 0 0 0)
KIAA1702 protein [Homo sapiens]	0.00553795	20.0657	60219.5	12697949	3 (1 1 0 0 1)
carbohydrate (chondroitin 4) sulfotransferase 11 [Homo sapiens]	0.00403208	20.0647	41528	8923758	4 (1 0 1 2 0)
autogenous vein graft remodeling associated protein 2 [Homo sapiens] [MA	0.00422569	20.0645	36263.9	86371123	4 (3 0 0 1 0)
ganciclovir kinase [Human herpesvirus 6]	0.0014151	20.0622	63860.3	9955689	3 (1 1 0 0 1)
S31503 H+/K+-exchanging ATPase (EC 3.6.3.10) ATP1AL1 - human (fragment)	0.000136664	18.2603	10485.2	346261	5 (2 3 0 0 0)
synaptosomal-associated protein, 25kDa [Homo sapiens]	7.89528e-09	18.2251	10676	24740601	2 (1 1 0 0 0)
lysosomal pepstatin insensitive protease [Homo sapiens]	9.17266e-12	18.2159	61190.7	2408232	2 (1 1 0 0 0)
syntaxin 1A (brain) [Homo sapiens]	3.57007e-09	18.201	33002.7	4759182	2 (1 1 0 0 0)
heat shock 70kDa protein 6 (HSP70B') [Homo sapiens]	2.67521e-06	18.184	70984.4	34419635	2 (1 1 0 0 0)
3-oxoacid CoA transferase 1 precursor [Homo sapiens]	5.70328e-09	18.1817	56122	4557817	2 (1 1 0 0 0)
immunoglobulin superfamily, member 8 [Homo sapiens]	2.74448e-07	18.1666	64993.6	16445029	3 (1 0 1 0 1)
A Chain A, Crystal Structure Of Human Cd81 Extracellular Domain, A Receptor Fo	0.000530887	18.1501	9898.87	13399775	3 (2 1 0 0 0)
plasma membrane calcium ATPase isoform 3 [Homo sapiens]	0.00107902	18.1413	34395.5	3089632	4 (2 1 0 0 1)
ADT3_HUMAN ADP/ATP translocase 3 (Adenine nucleotide translocator 2) (ANT 3) (A	0.000225567	18.1347	32845.2	113463	3 (2 1 0 0 0)
septin 3 isoform A [Homo sapiens]	1.00389e-08	18.1325	39320.4	22035572	2 (1 1 0 0 0)
hypothetical protein LOC567995 [Danio rerio]	0.00712691	18.1295	112684	113681579	3 (0 2 0 0 1)
Xeroderma Pigmentosum Group E Complementing protein [Homo sapiens]	0.00371795	18.1272	126831	2632123	3 (0 2 0 0 1)
non-metastatic cells 1, protein (NM23A) expressed in isoform b [Homo sa	2.79861e-05	18.1201	17137.7	4557797	3 (2 1 0 0 0)
NADH dehydrogenase (ubiquinone) 1 alpha subcomplex, 4, 9kDa [Homo sapie	0.00734964	18.1087	9363.91	4505357	2 (1 1 0 0 0)
glycerol-3-phosphate dehydrogenase 2 (mitochondrial) [Homo sapiens	7.82369e-07	18.106	80782.6	133908614	2 (1 1 0 0 0)
hCG1790759, isoform CRA_b [Homo sapiens]	0.00473523	18.1046	86696.9	119583328	2 (1 1 0 0 0)
SC10A_HUMAN Sodium channel protein type 10 subunit alpha (Sodium channel prot	0.00529285	18.1045	220422	56748895	2 (1 1 0 0 0)
crystallin, alpha B [Homo sapiens]	0.00756013	18.1019	20146.4	4503057	2 (1 1 0 0 0)
Unknown (protein for MGC:11099) [Homo sapiens] [MAS	0.00390307	18.1014	22727.4	116283309	3 (1 0 0 2 0)
epidermal growth factor receptor pathway substrate 8-like protein 2 [H	0.00239538	18.1003	80570.2	21264616	4 (1 0 1 2 0)
ZNT1_HUMAN Zinc transporter 1 (ZnT-1) (Solute carrier family 30 member 1)	0.00350189	18.0969	55292.2	23503107	3 (1 2 0 0 0)
glucose phosphate isomerase [Homo sapiens]	0.00257946	18.096	63107.3	18201905	2 (1 1 0 0 0)
KIAA1801 protein [Homo sapiens]	0.0053498	18.0953	142665	14017819	2 (1 1 0 0 0)
envelope glycoprotein [Human immunodeficiency virus 1]	0.00630158	18.089	23913	31505581	2 (1 1 0 0 0)
KIAA0756 splice variant 1 [Homo sapiens]	0.00150627	18.085	94362.5	54633206	2 (1 1 0 0 0)
ADP-ribosylation factor 5 [Homo sapiens]	0.00171267	18.0837	20516.6	4502209	3 (1 1 1 0 0)
T46481 hypothetical protein DKFZp434A025.1 - human (fragment)	0.00951365	18.0819	117578	11359883	3 (1 0 1 0 1)
KIAA1475 protein [Homo sapiens]	0.00646306	18.0818	111406	7959211	2 (1 1 0 0 0)
hCG1810857, isoform CRA_a [Homo sapiens]	0.00610361	18.0799	241806	119591751	4 (0 1 0 2 1)
carnitine deficiency-associated, expressed in ventricle 1 isoform 1 [H	0.00222733	18.0795	79695.6	32526901	3 (0 1 1 1 0)
protein kinase C, epsilon [Homo sapiens]	0.00572473	18.0782	83620.1	4885563	3 (1 1 0 1 0)
polyprotein [Human immunodeficiency virus 1]	0.00265189	18.075	67523.5	88853148	2 (1 1 0 0 0)
cGMP-gated cation channel subunit 2, cGMP-gated cation channel, subunit be	0.00679763	18.0745	102273	765320	4 (1 1 0 2 0)
envelope glycoprotein [Human immunodeficiency virus 1]	0.000406576	18.074	95660.2	86753469	2 (1 1 0 0 0)
AF484482_7 envelope glycoprotein [Human immunodeficiency virus 1]	0.00300744	18.0712	97931.2	25166685	2 (1 1 0 0 0)
CCNB3_HUMAN G2/mitotic-specific cyclin-B3	0.0062737	18.0692	157874	48428108	3 (0 2 0 0 1)
unnamed protein product [Homo sapiens]	0.00978473	18.0619	67540.4	1340152	3 (1 0 1 0 1)
unnamed protein product [Homo sapiens]	0.00627922	18.0619	77862.3	21749825	2 (1 1 0 0 0)
ZFY16_HUMAN Zinc finger FYVE domain-containing protein 16 (Endofin) (Endosome	0.0086894	18.0616	168742	50401753	2 (1 1 0 0 0)
gag protein [Human immunodeficiency virus 1]	0.00238838	18.0589	55770.5	55560678	2 (1 1 0 0 0)
KIAA1622 protein [Homo sapiens]	0.00726471	18.0539	101268	10047321	3 (0 1 1 1 0)
MYST histone acetyltransferase (monocytic leukemia) 3 [Homo sapiens]	0.0018505	18.0532	224913	5803098	2 (1 1 0 0 0)
basic transcription factor 3-like 4, isoform CRA_b [Homo sapiens]	0.00642824	18.0474	8926.93	119627201	3 (1 0 1 0 1)
ENO1B_HUMAN Alpha-enolase, lung specific (2-phospho-D-glycerate hydro-lyase) (N	1.39191e-10	16.2097	49446.4	729422	2 (1 0 1 0 0)
tubulin, beta, 2 [Homo sapiens]	7.53496e-06	16.1819	49799	5174735	4 (2 0 2 0 0)
hypothetical protein [Homo sapiens]	3.35098e-05	16.1484	113923	21732286	3 (2 0 1 0 0)
KNP-I beta protein [Homo sapiens]	0.00226501	16.1449	20110.6	2250701	2 (1 0 1 0 0)
N-myc downstream-regulated gene 2 isoform a [Homo sapiens]	0.000326251	16.1373	40772.2	42544211	2 (1 0 1 0 0)
deoxynucleotidyltransferase, terminal, interacting protein 2 [Homo sap	0.00741789	16.1228	84417.9	54633315	2 (1 0 1 0 0)
dimethylarginine dimethylaminohydrolase 1 [Homo sapiens]	0.00482314	16.1181	31101.9	6912328	2 (1 0 1 0 0)
gp160 [Human immunodeficiency virus 1]	0.00241908	16.1153	96239.5	18996230	5 (0 1 0 2 2)
KIAA0642 protein [Homo sapiens]	0.00229761	16.1108	153400	20521117	2 (1 0 1 0 0)
growth arrest-specific 1 [Homo sapiens]	0.00461864	16.1039	35698.1	4503919	2 (0 2 0 0 0)
conserved gene telomeric to alpha globin cluster isoform 1 [Homo s	0.00108676	16.0998	63564.9	116292162	3 (0 1 1 0 1)
heavy neurofilament subunit [Homo sapiens]	0.000366453	16.0958	111713	1841430	4 (3 0 1 0 0)
RNA binding motif protein 43 [Homo sapiens]	0.00161324	16.0912	40641	38348394	2 (1 0 1 0 0)
envelope glycoprotein [Human immunodeficiency virus 1]	0.0019827	16.091	98142.2	82571376	3 (0 1 1 0 1)
hypothetical protein DDBDRAFT_0168367 [Dictyostelium discoideum AX4]	0.00723868	16.0899	121216	66824379	4 (0 3 1 0 0)
dJ85M6.1 (cleavage stimulation factor, 3' pre-RNA, subunit 3, 77kD) [Ho	0.00608734	16.0892	81992.6	15131402	2 (1 0 1 0 0)
envelope glycoprotein [Human immunodeficiency virus 1]	0.00142865	16.0865	22118.1	24459652	2 (1 0 1 0 0)
CUE domain-containing 1 [Homo sapiens]	0.00927244	16.0849	42231.9	8923665	2 (0 2 0 0 0)
hypothetical protein [Homo sapiens]	0.0070497	16.0846	29407.3	34364673	2 (0 2 0 0 0)
maternal embryonic leucine zipper kinase [Homo sapiens]	0.00534264	16.0839	74594.4	7661974	3 (1 0 0 1 1)
polymerase subunit L [Human respiratory syncytial virus]	0.00873193	16.082	250309	1695266	2 (0 2 0 0 0)
hypothetical protein [Homo sapiens]	0.00452662	16.0819	40703.8	31874824	2 (1 0 1 0 0)
KIAA1007 protein [Homo sapiens]	0.000111236	16.0805	206196	20521724	4 (0 0 1 2 1)
acute myelogenous leukemia 1 translocation 1 protein isoform MTG8b [Ho	0.00731418	16.0781	67524.4	28329416	3 (1 0 0 1 1)
KIAA0356 protein [Homo sapiens]	0.00842751	16.0772	117597	6634023	2 (0 2 0 0 0)
olfactory receptor, family 1, subfamily M, member 1 [Homo sapiens]	0.000848889	16.0772	34816.2	52218828	2 (1 0 1 0 0)
melanoma antigen family B, 18 [Homo sapiens]	0.00669035	16.0757	38498.4	27734781	2 (1 0 1 0 0)
DNC_HUMAN Mitochondrial deoxynucleotide carrier (Solute carrier family 25 mem	0.00359773	16.0748	35488.3	20137652	3 (1 0 0 1 1)
AF286229_8 envelope glycoprotein [Human immunodeficiency virus type 1] [M	0.00394881	16.0732	97648.9	13569275	2 (0 2 0 0 0)
tau-tubulin kinase [Homo sapiens]	0.00576953	16.0691	182352	27451602	5 (0 1 1 1 2)
polyamine oxidase (exo-N4-amino) isoform 1 [Homo sapiens]	0.00315273	16.069	55478.1	23097272	3 (0 1 1 0 1)
VHS domain-containing protein / GAT domain-containing protein [Arabido	0.002391	16.0643	42770.1	18390626	3 (0 0 2 1 0)
ganglioside-induced differentiation-associated protein 1 isoform a [H	0.00158652	16.0621	41319.7	108773797	2 (0 2 0 0 0)
protein expressed in prostate, ovary, testis, and placenta 8 isofor	0.00178868	16.0589	56129.9	53828703	2 (1 0 1 0 0)
truncated envelope glycoprotein [Human immunodeficiency virus 1]	0.00169146	16.0585	9843.96	74476596	2 (0 2 0 0 0)
tubulin polymerization promoting protein [Homo sapiens]	8.17763e-09	14.2082	23679.2	5902018	2 (1 0 0 1 0)
Na+/K+ -ATPase beta 2 subunit [Homo sapiens]	1.92704e-06	14.189	33345.4	49574491	2 (1 0 0 1 0)
alpha 2 globin [Homo sapiens]	1.92749e-10	14.1717	15247.9	4504345	2 (1 0 0 1 0)
hypothetical protein LOC345651 [Homo sapiens]	0.000123417	14.1481	41976	63055057	7 (0 3 3 0 1)
Chromosome 11 open reading frame 47 [Homo sapiens]	0.000801556	14.1275	68573.6	84627448	2 (1 0 0 1 0)
C-type lectin domain family 3 member A [Homo sapiens]	0.00696261	14.1237	22218.5	148728186	2 (0 1 1 0 0)
CAPZB_HUMAN F-actin capping protein subunit beta (CapZ beta)	0.00145604	14.1187	31330.8	13124696	2 (1 0 0 1 0)
SH3-domain GRB2-like 2 [Homo sapiens]	0.00607216	14.1137	39937.1	4506931	2 (1 0 0 1 0)
VATA2_HUMAN Vacuolar ATP synthase catalytic subunit A, osteoclast isoform (V-AT	0.000271404	14.1126	68134.6	586208	2 (0 1 1 0 0)
cytochrome c oxidase subunit VIb [Homo sapiens]	0.0039887	14.1118	10185.7	4502985	2 (1 0 0 1 0)
keratin [Homo sapiens]	9.92723e-06	14.1106	51303.3	1200072	4 (1 2 1 0 0)
transmembrane protein 10 isoform a [Homo sapiens]	0.000384945	14.1075	15673	15082236	3 (1 1 0 1 0)
ribonuclease P/MRP 38 subunit [Mus musculus]	0.0041937	14.1029	31110.2	71480066	2 (0 1 1 0 0)
envelope glycoprotein [Human immunodeficiency virus 1]	0.00840364	14.1014	96361.3	86753509	3 (0 1 0 1 1)
conserved ERA-like GTPase [Homo sapiens]	0.00321259	14.0983	48323.6	14211570	2 (1 0 0 1 0)
annexin A2 isoform 2 [Homo sapiens]	0.000442631	14.0947	38579.8	4757756	2 (1 0 0 1 0)
integrin alpha M precursor [Homo sapiens]	0.00178176	14.0945	127099	88501734	4 (0 0 1 1 2)
FLJ00181 protein [Homo sapiens]	0.00864424	14.0908	41493.1	18676568	3 (0 0 2 0 1)
unnamed protein product [Homo sapiens]	0.000150227	14.0844	19530.6	10434004	2 (1 0 0 1 0)
P2Y13_HUMAN P2Y purinoceptor 13 (P2Y13) (G-protein coupled receptor 86) (G-pr	0.00688276	14.0838	38414.5	37999869	5 (2 1 1 1 0)
DNA packaging terminase subunit 1 [Human herpesvirus 3]	0.00462653	14.0806	82704	9625919	2 (1 0 0 1 0)
ring finger and CCCH-type zinc finger domains 2 [Homo sapiens]	0.0009128	14.077	96287.6	9256537	4 (0 0 1 1 2)
hypothetical protein LOC51233, isoform CRA_b [Homo sapiens]	0.00289796	14.0769	18838.7	119579990	2 (1 0 0 1 0)
Chain , Human Rhoa Complexed With Gtp Analogue	0.00640251	14.0749	20557.3	3318980	2 (0 1 1 0 0)
hypothetical protein [Homo sapiens]	0.0015218	14.0722	64676.5	5912126	2 (0 1 1 0 0)
KIAA1350 protein [Homo sapiens]	0.00919223	14.0716	102447	7243081	3 (0 1 0 1 1)
eukaryotic translation initiation factor 2B, subunit 1 alpha, 26kDa [Ho	0.00554222	14.0701	33690.8	4503503	2 (0 1 1 0 0)
dynein, cytoplasmic 1, intermediate chain 2 [Homo sapiens]	8.19027e-05	14.0694	71412.2	24307879	2 (1 0 0 1 0)
reverse transcriptase [Human immunodeficiency virus 1]	0.000443857	14.0692	24687.6	25282133	2 (1 0 0 1 0)
hCG2038473 [Homo sapiens]	0.00992536	14.069	13914.3	119623537	2 (0 1 1 0 0)
Mitochondrial inner membrane protein exposed to the mitochondrial matri	0.00924721	14.0689	52141.9	6325382	2 (0 1 1 0 0)
hCG2045008 [Homo sapiens]	0.00546362	14.0671	12143.5	119572109	2 (0 1 1 0 0)
class-I MHC-restricted T cell associated molecule [Homo sapiens]	0.000226954	14.0667	44640.9	3930163	2 (0 1 1 0 0)
P2RX5_HUMAN P2X purinoceptor 5 (ATP receptor) (P2X5) (Purinergic receptor) [M	0.000889779	14.0662	47073.6	12643425	3 (0 1 0 1 1)
RAB11 family interacting protein 2 (class I) [Homo sapiens]	0.00136623	14.0655	58242.6	7662394	2 (0 1 1 0 0)
A Chain A, Crystal Structure Of Constant Regulatory Domain Of Human Pp2a, Pr65a	0.000657751	14.0654	65136.1	4558258	3 (1 0 0 1 1)
similar to UDP-N-acteylglucosamine pyrophosphorylase 1 in Homo sapiens [	0.00442059	14.0618	17554	29841328	2 (1 0 0 1 0)
transmembrane protease, serine 7 [Homo sapiens]	0.0073607	14.0561	63999.3	110431331	2 (1 0 0 1 0)
JW0057 gravin - human	4.95444e-05	14.0537	181564	7512469	3 (0 1 0 1 1)
solute carrier family 25 (mitochondrial carrier; oxoglutarate carrier)	4.6212e-07	12.1832	34039.8	21361114	2 (1 0 0 0 1)
H2A histone family, member A [Homo sapiens]	4.04488e-06	12.182	14127	10645195	4 (3 0 0 0 1)
TBB4Q_HUMAN Tubulin beta-4q chain	1.089e-08	12.1713	48403.5	12643363	2 (1 0 0 0 1)
RAP2A, member of RAS oncogene family [Homo sapiens]	0.000467992	12.1372	20602.3	10518344	2 (1 0 0 0 1)
leucine zipper-EF-hand containing transmembrane protein 1 [Homo sapiens	4.05149e-05	12.1336	83302	6912482	2 (1 0 0 0 1)
AF120904_1 Nef [Human immunodeficiency virus type 1]	0.00414149	12.1332	23515.6	5730844	2 (0 1 0 1 0)
hCG19408 [Homo sapiens]	0.00236567	12.1238	13754.4	119623204	2 (0 1 0 1 0)
gp160 [Human immunodeficiency virus 1]	0.00143852	12.1168	96488.6	18996232	4 (0 0 1 1 2)
SYUG_HUMAN Gamma-synuclein (Persyn) (Breast cancer-specific gene 1 protein) (	0.001099	12.1133	13322.8	90110074	3 (2 0 0 0 1)
gp120 protein [Human immunodeficiency virus 1] [MA	0.00696201	12.1066	24526.3	27848315	2 (0 1 0 1 0)
envelope glycoprotein [Human immunodeficiency virus 1]	0.00518276	12.102	96263.3	51950747	2 (0 1 0 1 0)
hypothetical protein LOC286077 [Homo sapiens] [MA	0.00159159	12.1005	127023	87080811	2 (1 0 0 0 1)
cysteine-rich protein 2 [Homo sapiens]	0.000347758	12.0948	22478	4503049	2 (1 0 0 0 1)
uncoupling protein homolog [Homo sapiens]	0.00646926	12.0908	33236.1	2052355	2 (1 0 0 0 1)
VE1_HPV17 Replication protein E1 (ATP-dependent helicase E1)	0.00550249	12.0901	70433.1	549220	2 (1 0 0 0 1)
U15 [Human herpesvirus 7]	0.00709187	12.0886	22895.2	51874238	2 (1 0 0 0 1)
KIAA2018 protein [Homo sapiens]	0.00300034	12.088	181327	24899200	3 (0 0 1 1 1)
HNRPL_HUMAN Heterogeneous nuclear ribonucleoprotein L (hnRNP L)	0.000469803	12.0865	60149.3	133274	4 (0 0 3 1 0)
PLSB_HUMAN Glycerol-3-phosphate acyltransferase, mitochondrial precursor (GPA	0.00443071	12.0855	93735.6	59803040	5 (1 3 0 1 0)
L1 [Human papillomavirus - 72]	0.00242517	12.0829	56463.1	1491691	2 (0 0 2 0 0)
zinc finger protein 567 [Homo sapiens]	0.000918967	12.0815	71510.3	34303941	4 (1 0 1 1 1)
US26 [Human herpesvirus 5 strain AD169]	0.00787552	12.0814	69975.8	9625862	2 (1 0 0 0 1)
putative binding protein 7a5 [Homo sapiens]	0.000644919	12.0792	96577.9	32997047	2 (1 0 0 0 1)
cappuccino [Homo sapiens]	0.00956864	12.0761	23336.5	8922952	3 (1 0 0 0 2)
glutathione S-transferase theta 2 [Homo sapiens]	0.00681773	12.0744	27489.5	4504187	2 (0 1 0 1 0)
ribonucleoside-diphosphate reductase M1 chain [Homo sapiens]	0.00855642	12.069	90012.5	4506749	2 (1 0 0 0 1)
AF251292_1 DC21 [Homo sapiens]	0.00554222	12.0679	22195.8	12005726	2 (1 0 0 0 1)
neurexin 1, isoform CRA_d [Homo sapiens]	0.00988791	12.0668	55550.8	119620590	3 (1 1 0 0 1)
pol protein [Human immunodeficiency virus 1]	0.0097982	12.0659	113542	30027255	2 (0 0 2 0 0)
norrin [Homo sapiens]	0.00914421	12.0658	15033.2	4557789	3 (0 0 1 1 1)
dipeptidase precursor [Homo sapiens]	0.0030523	12.0615	45635	219600	2 (1 0 0 0 1)
6-phosphofructo-2-kinase/fructose-2,6-biphosphatase 3 [Homo sapiens]	0.00899657	12.0613	59571.3	4758900	2 (1 0 0 0 1)
KIAA1925 protein [Homo sapiens]	0.000633438	12.0599	130743	15620909	2 (1 0 0 0 1)
dynein, axonemal, intermediate polypeptide 2 [Homo sapiens]	0.007474	12.0592	68807.6	89242128	2 (0 1 0 1 0)
coiled-coil domain containing 9 [Homo sapiens]	0.00415629	12.0582	59667.2	7661690	3 (0 0 0 3 0)
transmembrane 6 superfamily member 1 [Homo sapiens]	0.00146477	12.0573	41636.7	13194199	2 (1 0 0 0 1)
EFHC1_HUMAN EF-hand domain-containing protein 1	0.00155808	12.0571	73943.7	74762202	2 (0 1 0 1 0)
UBP24_HUMAN Ubiquitin carboxyl-terminal hydrolase 24 (Ubiquitin thioesterase	0.000822587	12.0567	210933	85681902	2 (0 0 2 0 0)
zinc finger, MYM-type 6 [Mus musculus]	0.00618254	12.0564	139250	29126191	2 (0 1 0 1 0)
ORF K2 [Human herpesvirus 8 type M]	0.00178009	12.055	23393.2	18845974	2 (1 0 0 0 1)
regulatory protein E2 [Human papillomavirus type 71]	0.00723807	12.0536	32318.9	19343449	2 (0 1 0 1 0)
unnamed protein product [Homo sapiens]	0.0079306	12.0485	61705.9	21758338	2 (1 0 0 0 1)
U52 [Human herpesvirus 7]	0.000118453	12.0482	29408.5	51874274	2 (1 0 0 0 1)
zinc finger, CDGSH-type domain 1 [Homo sapiens]	1.27265e-08	10.2322	12191.2	8923930	1 (1 0 0 0 0)
histone H2B [Homo sapiens]	2.78515e-09	10.2317	13927.6	1568557	2 (1 1 0 0 0)
ras homolog gene family, member B [Homo sapiens]	0.000772803	10.2261	22109.1	4757764	1 (1 0 0 0 0)
41kD protein kinase [Homo sapiens]	1.4545e-11	10.2179	41335.2	23881	1 (1 0 0 0 0)
H2A histone family, member O [Homo sapiens]	5.73746e-09	10.2172	14086.9	4504251	3 (2 0 1 0 0)
Chain , Human Complement Regulatory Protein Cd59 (Extracellular Region, Resid	6.29142e-07	10.2117	8080.61	515118	2 (2 0 0 0 0)
MOX2 [Homo sapiens]	1.44689e-07	10.2041	30719	1335216	1 (1 0 0 0 0)
guanine nucleotide binding protein, alpha activating polypeptide O [Ho	1.39013e-08	10.2006	40024.9	10567816	2 (2 0 0 0 0)
FLJ00118 protein [Homo sapiens]	0.000235614	10.2001	13688	10440536	1 (1 0 0 0 0)
MARCS_HUMAN Myristoylated alanine-rich C-kinase substrate (MARCKS) (Protein k	3.64695e-07	10.1964	31535.9	76803798	2 (2 0 0 0 0)
synapsin II isoform IIa [Homo sapiens]	7.60889e-06	10.1929	62956.8	19924103	1 (1 0 0 0 0)
FXYD domain-containing ion transport regulator 6 [Homo sapiens]	1.31134e-05	10.1919	10535.4	11612655	2 (2 0 0 0 0)
neural cell adhesion molecule 1 isoform 1 [Homo sapiens]	1.5166e-08	10.1896	93302.6	94420689	1 (1 0 0 0 0)
neurofilament-66; NF-66 [Homo sapiens]	3.93811e-07	10.1886	54875.2	994844	2 (2 0 0 0 0)
A Chain A, Structure Of The Human PinLC8 DIMER WITH A BOUND PEPTIDE	1.73371e-05	10.1862	9853.93	7245516	1 (1 0 0 0 0)
DPYL4_HUMAN Dihydropyrimidinase-related protein 4 (DRP-4) (Collapsin response	2.9749e-05	10.1829	61838.5	68067941	4 (2 2 0 0 0)
guanine nucleotide binding protein (G protein), gamma 7 [Homo sapiens]	3.01908e-09	10.1823	7516.95	32698769	1 (1 0 0 0 0)
guanine nucleotide binding protein (G protein) alpha 12 [Homo sapiens]	6.91113e-05	10.173	44251.4	42476111	3 (0 2 0 0 1)
brain link protein-1 [Homo sapiens]	0.000794919	10.168	37751.1	11141887	1 (1 0 0 0 0)
claudin 11 [Homo sapiens]	3.16069e-07	10.1663	21978.4	10938016	1 (1 0 0 0 0)
glycoprotein M6B isoform 1 [Homo sapiens]	0.000645844	10.1608	36195.7	50263048	1 (1 0 0 0 0)
A Chain A, The Crystal Structure Of Human Transhydrogenase Domain Iii With Bou	0.000853864	10.1588	22245.4	12084180	1 (1 0 0 0 0)
AF471460_1 Ig heavy chain variable region, VH3 family [Homo sapiens] [MAS	0.00045903	10.1573	13217.3	33319464	3 (1 1 1 0 0)
reverse transcriptase [Human immunodeficiency virus 1]	0.00301314	10.1566	25570.5	56714218	2 (1 0 0 1 0)
dynein light chain LC8-type 2 [Mus musculus]	0.00105259	10.1547	10343.1	18087731	2 (2 0 0 0 0)
myelin basic protein isoform 4 [Homo sapiens]	5.46395e-06	10.1546	17332.8	68509932	8 (7 0 0 1 0)
AF138453_1 envelope glycoprotein [Human immunodeficiency virus type 1] [MA	0.00053317	10.1532	22264.1	6958810	3 (1 2 0 0 0)
receptor accessory protein 5 [Homo sapiens]	1.63449e-06	10.1505	21479	115430112	1 (1 0 0 0 0)
hemoglobin beta chain [Homo sapiens]	0.000890446	10.1486	4510.41	33694204	3 (2 1 0 0 0)
neuroplastin isoform a precursor [Homo sapiens]	1.68909e-05	10.1484	31271.9	9257240	1 (1 0 0 0 0)
cytochrome c oxidase subunit VIIa polypeptide 2 (liver) precursor [Homo	3.04545e-05	10.1483	9390.1	4502989	1 (1 0 0 0 0)
hypothetical protein LOC283450 [Homo sapiens]	0.00936355	10.1473	73057.9	27902289	2 (0 0 1 1 0)
synaptosomal-associated protein, 91kDa homolog (mouse) [Homo sapiens] [M	1.27342e-05	10.1423	91979.2	7671635	1 (1 0 0 0 0)
basigin isoform 1 [Homo sapiens]	1.36576e-07	10.1417	42174.1	38372919	1 (1 0 0 0 0)
neurolysin [Homo sapiens]	0.00343321	10.1386	80599.8	14149738	2 (1 0 1 0 0)
ankyrin 2 isoform 1 [Homo sapiens]	0.00340992	10.1381	433447	52426735	1 (1 0 0 0 0)
capsid glycoprotein [Human rotavirus A]	0.00251268	10.1375	28696.3	112523699	1 (1 0 0 0 0)
S38532 protein 14-3-3 eta chain - human	0.000431741	10.1343	28172	481365	1 (1 0 0 0 0)
KIAA0232 protein [Homo sapiens]	0.0095872	10.1301	155522	20521850	1 (1 0 0 0 0)
SI:dZ87I4.1 (novel protein similar to human signal transducer and activ	0.00611141	10.1287	132636	22316176	2 (2 0 0 0 0)
histidine triad nucleotide binding protein 3 [Homo sapiens]	6.49588e-06	10.1279	20362.1	21359982	1 (1 0 0 0 0)
hypothetical protein LOC158401 isoform 1 [Homo sapiens]	0.00648534	10.1264	165097	124028515	2 (0 0 1 1 0)
ATP synthase, H+ transporting, mitochondrial F1 complex, delta subunit	1.86868e-07	10.1264	17479.2	4502297	1 (1 0 0 0 0)
killer cell immunoglobulin-like receptor, two domains, long cytoplasmi	0.00576129	10.1261	40652.3	11968154	1 (1 0 0 0 0)
gag protein [Human immunodeficiency virus 1]	0.00022445	10.1252	55769.5	124389770	2 (2 0 0 0 0)
unnamed protein product [Homo sapiens]	8.10668e-05	10.1243	46800.1	21753491	2 (1 0 0 0 1)
solute carrier family 30 (zinc transporter), member 3 [Homo sapiens]	1.57322e-05	10.1237	41918.3	21361112	1 (1 0 0 0 0)
heat shock 70kDa protein 8 isoform 1 variant [Homo sapiens]	0.00764561	10.1236	70855.3	62897129	1 (1 0 0 0 0)
envelope glycoprotein [Human immunodeficiency virus type 1]	0.00274395	10.1232	28179.2	1845743	1 (1 0 0 0 0)
myosin, light polypeptide 6, alkali, smooth muscle and non-muscle [Mus	4.7044e-06	10.1219	16950.1	33620739	1 (1 0 0 0 0)
cytoplasmic dynein 3 heavy chain [Homo sapiens] [MAS	0.00706045	10.1215	22085.2	1314647	2 (0 0 1 1 0)
A Chain A, Human Vimentin Coil 2b Fragment (Cys2)	0.00155258	10.1206	9901.82	20149836	1 (1 0 0 0 0)
zinc finger homeodomain protein [Homo sapiens]	0.00178861	10.1195	404218	976347	1 (1 0 0 0 0)
neuroplastin isoform b precursor [Homo sapiens]	0.000300414	10.1192	44359.6	6912646	1 (1 0 0 0 0)
ras-related GTP-binding protein RAB10 [Homo sapiens]	8.29903e-05	10.1159	22454.6	33695095	1 (1 0 0 0 0)
ras related v-ral simian leukemia viral oncogene homolog A [Homo sapie	0.000418043	10.1145	23552	33946329	1 (1 0 0 0 0)
phosphoglycerate mutase 1 (brain) [Homo sapiens]	0.000745671	10.1139	28785.8	4505753	1 (1 0 0 0 0)
A Chain A, Human Prion Protein	3.68077e-05	10.1131	22876.6	6730485	1 (1 0 0 0 0)
DJ-1 protein [Homo sapiens]	1.87752e-05	10.1108	19878.5	31543380	1 (1 0 0 0 0)
ankyrin B (440 kDa) [Homo sapiens]	0.000563372	10.1107	429876	4803663	1 (1 0 0 0 0)
polyprotein [Human rhinovirus 44]	0.00226008	10.1103	242076	95102514	1 (1 0 0 0 0)
unnamed protein product [Homo sapiens]	0.0044605	10.1097	61045.2	7022512	1 (1 0 0 0 0)
guanine nucleotide-binding protein, beta-3 subunit [Homo sapiens]	0.00214701	10.1087	37196.9	4504053	14 (4 3 1 4 2)
CD59 antigen p18-20 [Homo sapiens]	2.00799e-05	10.108	14167.8	10835165	1 (1 0 0 0 0)
A Chain A, Crystal Structure Of Dictyostelium Discoideum Actin Complexed With	9.67683e-07	10.1078	41574.7	28374049	2 (1 1 0 0 0)
ubiquitin-conjugating enzyme E2E 3 [Homo sapiens]	0.0025606	10.1076	22898.5	5454146	1 (1 0 0 0 0)
A Chain A, The Yeast Actin Val 159 Asn Mutant Complex With Human Gelsolin Segme	0.00892717	10.1066	41677.8	7546413	5 (2 1 2 0 0)
envelope glycoprotein [Human immunodeficiency virus type 1]	0.0021132	10.1064	47270.7	1946814	1 (1 0 0 0 0)
cell division cycle 42 isoform 2 [Homo sapiens]	4.2335e-05	10.1046	21296.9	16357472	1 (1 0 0 0 0)
isocitrate dehydrogenase 3 (NAD+) alpha precursor [Homo sapiens]	9.90033e-05	10.1023	39566.1	5031777	1 (1 0 0 0 0)
amyloid beta precursor protein-binding protein 2 [Homo sapiens]	0.0028622	10.1008	66811	18104962	1 (1 0 0 0 0)
envelope glycoprotein [Human immunodeficiency virus 1]	0.00305146	10.0998	96332.1	58043865	2 (0 1 0 0 1)
KIAA1726 protein [Homo sapiens]	0.00632002	10.0993	70689	12697997	2 (2 0 0 0 0)
envelope glycoprotein [Human immunodeficiency virus 1]	0.00502105	10.0991	12037.1	67944331	1 (1 0 0 0 0)
hCG1780265 [Homo sapiens]	0.000149448	10.0984	26536.6	119600068	1 (1 0 0 0 0)
Gag polyprotein [Human immunodeficiency virus 1] [	0.00605896	10.0983	55428.2	31559625	2 (1 1 0 0 0)
Manganese superoxide dismutase [Homo sapiens]	0.00639129	10.0982	24694.5	34707	1 (1 0 0 0 0)
KIAA0041 [Homo sapiens]	0.000920906	10.0969	88243.3	27529706	3 (2 1 0 0 0)
BTB and CNC homology 1, basic leucine zipper transcription factor 2 [H	0.00435079	10.0969	92477.3	13540490	1 (1 0 0 0 0)
ring finger protein 145 [Homo sapiens]	0.00172024	10.0969	78853.2	21389515	1 (1 0 0 0 0)
RUN and SH3 domain containing 1 [Homo sapiens] [MA	0.000931015	10.0962	52718.5	55957740	1 (1 0 0 0 0)
hypothetical protein DDBDRAFT_0167227 [Dictyostelium discoideum AX4]	0.00860908	10.0956	18299	66819753	1 (1 0 0 0 0)
chordin-like 2, isoform CRA_a [Homo sapiens]	0.00453451	10.0953	11657.7	119595350	7 (4 2 1 0 0)
envelope glycoprotein [Human immunodeficiency virus 1]	0.0074718	10.0953	17560.9	47778494	1 (1 0 0 0 0)
pol protein [Human immunodeficiency virus 1]	0.00263761	10.095	39108.9	3702894	1 (1 0 0 0 0)
reticulon 3 isoform b [Homo sapiens]	0.000245546	10.0948	110584	41393608	1 (1 0 0 0 0)
LOC389203 protein [Homo sapiens]	0.00349186	10.0936	11438.8	21619079	1 (1 0 0 0 0)
unnamed protein product [Homo sapiens]	0.00600155	10.0934	14238	34529932	1 (1 0 0 0 0)
VHL [Homo sapiens]	0.000218505	10.0928	3442.7	5524921	3 (2 0 0 1 0)
hCG1818354 [Homo sapiens]	0.0021391	10.0923	15391.1	119595566	2 (2 0 0 0 0)
hypothetical protein [Homo sapiens]	0.0088086	10.0922	43815.6	50949449	3 (0 0 1 0 2)
hCG2041811 [Homo sapiens]	0.000806495	10.0917	6266.08	119568682	2 (0 1 0 0 1)
misato homolog 1 (Drosophila), isoform CRA_b [Homo sapiens]	0.00305639	10.0911	27345	119573424	1 (1 0 0 0 0)
PTPRZ_HUMAN Receptor-type tyrosine-protein phosphatase zeta precursor (R-PTP-ze	0.000468063	10.091	254370	400199	1 (1 0 0 0 0)
immunoglobulin lambda chain variable region [Homo sapiens]	0.00961393	10.091	11624.7	23343557	1 (1 0 0 0 0)
peroxiredoxin 3 isoform a precursor [Homo sapiens]	0.00358266	10.0909	27675.2	5802974	2 (1 1 0 0 0)
KIAA0588 protein [Homo sapiens]	0.00492628	10.0909	101780	40788296	3 (0 2 0 0 1)
nef protein [Human immunodeficiency virus 1]	0.00486695	10.0908	25079.4	85700512	1 (1 0 0 0 0)
L36874_7 nef protein [Human immunodeficiency virus 2]	0.00785786	10.0906	26958.2	16905451	2 (1 0 0 0 1)
thymosin, beta 4, X chromosome [Mus musculus]	0.00173981	10.0905	5049.52	10946578	1 (1 0 0 0 0)
RAB GTPase activating protein 1 [Homo sapiens]	0.00499926	10.0893	114071	12232373	3 (0 1 1 0 1)
glutathione S-transferase theta 1 [Homo sapiens] [	0.00107807	10.0891	7182.78	66862636	1 (1 0 0 0 0)
gag protein [Human immunodeficiency virus 1]	0.00262063	10.0889	17837.3	123191868	1 (1 0 0 0 0)
TR2_HUMAN Orphan nuclear receptor TR2 (Testicular receptor 2)	0.00163253	10.0889	53008.2	136117	1 (1 0 0 0 0)
AC013256_1 R31155_1 [Homo sapiens]	0.00093559	10.0888	84197.6	6249687	1 (1 0 0 0 0)
envelope glycoprotein [Human immunodeficiency virus type 1]	0.0056863	10.0887	22980.3	1263227	1 (1 0 0 0 0)
envelope glycoprotein [Human immunodeficiency virus 1]	0.00195708	10.0886	95036	51572110	2 (0 0 1 1 0)
hCG1642703, isoform CRA_a [Homo sapiens]	0.000182384	10.0885	11395.8	119629326	1 (1 0 0 0 0)
immunoglobulin alpha heavy chain variable region [Homo sapiens]	0.00610501	10.0884	14011.9	62871218	3 (2 0 0 0 1)
envelope glycoprotein [Human immunodeficiency virus 1]	0.00297673	10.0883	96650.9	62195120	2 (0 0 1 1 0)
stathmin 1 [Homo sapiens]	0.00664689	10.0883	17292	5031851	4 (1 1 2 0 0)
NSP4 equivalent protein [Rotavirus C]	0.00139359	10.0879	17693.8	78761398	1 (1 0 0 0 0)
coiled-coil-helix-coiled-coil-helix domain containing 3 [Homo sapiens]	0.0065953	10.0877	26136.2	8923390	1 (1 0 0 0 0)
envelope glycoprotein [Human immunodeficiency virus 1]	0.0032213	10.0872	99056.6	90994118	1 (1 0 0 0 0)
unnamed protein product [Homo sapiens]	0.00319037	10.0871	18899.1	34534940	1 (1 0 0 0 0)
chromosome 10 open reading frame 21 [Homo sapiens]	0.00363124	10.0854	33366.2	55959390	1 (1 0 0 0 0)
AF119917_42 PRO2372 [Homo sapiens]	4.36992e-05	10.0853	7974.16	7770197	2 (1 0 0 0 1)
tat protein [Human immunodeficiency virus 1]	0.00827816	10.0853	11457.7	88174691	1 (1 0 0 0 0)
envelope glycoprotein [Human immunodeficiency virus 1]	0.00857817	10.0851	97249	37962992	1 (1 0 0 0 0)
NSp1 [Human rotavirus A]	0.00529852	10.085	57578	55793486	1 (1 0 0 0 0)
USP9Y_HUMAN Probable ubiquitin carboxyl-terminal hydrolase FAF-Y (Ubiquitin th	0.000166164	10.0847	290931	2501464	1 (1 0 0 0 0)
I77371 CD44R5 - human	0.00116217	10.0847	42973.8	2134882	1 (1 0 0 0 0)
env protein [Human immunodeficiency virus 1] [MAS	0.0008102	10.0846	24131.7	124483121	1 (1 0 0 0 0)
ribonuclease, RNase A family, 10 (non-active) [Homo sapiens]	0.00489836	10.0844	23992.8	61175227	1 (1 0 0 0 0)
TRI36_HUMAN Tripartite motif-containing protein 36 (Zinc-binding protein Rbcc	0.00201378	10.0842	82958.9	56404974	1 (1 0 0 0 0)
glucocorticoid modulatory element binding protein 2 [Homo sapiens]	0.00132716	10.0837	56385.9	6912568	2 (0 1 0 0 1)
CD40 antigen isoform 2 precursor variant [Homo sapiens]	0.00269003	10.0825	28093.3	62088900	1 (1 0 0 0 0)
exportin 1 [Homo sapiens]	0.00569211	10.0824	123306	4507943	1 (1 0 0 0 0)
PH1315 Ig heavy chain DJ region (clone C286-119) - human (fragment)	0.0027209	10.0818	2104.03	346028	1 (1 0 0 0 0)
envelope glycoprotein [Human immunodeficiency virus 1]	0.00627903	10.0816	96513.1	89277820	1 (1 0 0 0 0)
A Chain A, Superoxide Dismutase (E.C.1.15.1.1)	0.00748249	10.0814	15908	515251	1 (1 0 0 0 0)
immunoglobulin heavy chain variable region [Homo sapiens]	0.00230873	10.0814	10885.3	71273857	1 (1 0 0 0 0)
deltex 3 homolog [Homo sapiens]	0.000172182	10.0814	37963.6	30425428	1 (1 0 0 0 0)
hCG2045318 [Homo sapiens]	0.00959466	10.0811	11162.3	119596410	1 (1 0 0 0 0)
AF222694_1 galectin-related inhibitor of proliferation isoform b [Homo sap	0.00960284	10.0807	33236	6979967	1 (1 0 0 0 0)
tumor protein D52 isoform 3 [Homo sapiens]	0.00405108	10.0804	19851.2	4827038	1 (1 0 0 0 0)
envelope glycoprotein [Human immunodeficiency virus 1]	0.00470924	10.08	34841.7	62547971	1 (1 0 0 0 0)
gag protein [Human immunodeficiency virus 1]	0.00279895	10.0793	15768.1	22074678	1 (1 0 0 0 0)
PN0453 adenylate cyclase (EC 4.6.1.1) - human (fragment)	0.00368248	10.0792	7422.9	484939	1 (1 0 0 0 0)
POLG_POL32 Genome polyprotein [Contains: Capsid protein VP4 (P1A) (Virion prote	0.00235806	10.0789	245574	130502	1 (1 0 0 0 0)
AF191360_1 envelope glycoprotein [Human immunodeficiency virus type 1] [MA	0.00144222	10.0788	16928.6	7158485	1 (1 0 0 0 0)
protocadherin gamma subfamily A, 5 isoform 2 precursor [Homo sapiens]	0.000940179	10.0781	88704.3	14196471	1 (1 0 0 0 0)
immunoglobulin heavy chain variable region [Homo sapiens]	0.00486316	10.078	13733.7	5679520	1 (1 0 0 0 0)
transcription elongation factor TFIIS.h [Homo sapiens]	0.00045595	10.0779	35765	3288459	1 (1 0 0 0 0)
zinc finger protein 294, isoform CRA_b [Homo sapiens]	0.00430731	10.0779	156015	119630341	1 (1 0 0 0 0)
immunoglobulin heavy chain variable region [Homo sapiens]	0.000915127	10.0776	10530.2	112701075	1 (1 0 0 0 0)
chromosome 17 open reading frame 27 [Homo sapiens]	0.00634452	10.0763	373741	66571327	1 (1 0 0 0 0)
death-associated protein kinase 3 [Homo sapiens]	0.0087812	10.0759	52503.4	4557511	1 (1 0 0 0 0)
P2Y-like G-protein coupled receptor [Homo sapiens]	0.00370352	10.0755	33375.9	2695876	1 (1 0 0 0 0)
transmembrane protein 88, isoform CRA_b [Homo sapiens]	0.00400779	10.0755	22870.6	119610531	1 (1 0 0 0 0)
PRP3 pre-mRNA processing factor 3 homolog [Homo sapiens]	0.00493801	10.0751	77481	4758556	2 (0 1 0 0 1)
immunoglobulin heavy chain [Homo sapiens]	0.00753	10.0749	15814	35232	1 (1 0 0 0 0)
small nuclear ribonucleoprotein polypeptide A' variant [Homo sapiens] [	0.00160562	10.0746	28384.1	62897701	1 (1 0 0 0 0)
hypothetical protein [Homo sapiens]	0.00340097	10.0744	31255	21739162	1 (1 0 0 0 0)
envelope glycoprotein [Human immunodeficiency virus 1]	0.000392253	10.073	97148.7	87116039	2 (0 1 0 0 1)
autism susceptibility candidate 2 [Homo sapiens]	0.0045668	10.073	138897	17864090	3 (1 1 0 0 1)
immunoglobulin heavy chain complementarity-determining region 3 [Homo sa	0.00203207	10.0726	2628.23	29497780	2 (1 1 0 0 0)
AF151040_1 HSPC206 [Homo sapiens]	0.00382548	10.0726	37402.6	7106802	1 (1 0 0 0 0)
envelope glycoprotein [Human immunodeficiency virus 1]	0.000801078	10.0716	38127.4	29647626	1 (1 0 0 0 0)
VL2_HPV52 Minor capsid protein L2	0.00907431	10.0715	50326.8	549368	1 (1 0 0 0 0)
unknown [Homo sapiens]	0.00117263	10.0713	68657.9	62822301	1 (1 0 0 0 0)
PO-GA [Homo sapiens]	0.00582778	10.0702	128203	296908	4 (0 2 0 1 1)
envelope glycoprotein [Human immunodeficiency virus 1]	0.00976452	10.0701	48710.7	22074612	1 (1 0 0 0 0)
nuclear casein kinase and cyclin dependent kinase substrate [Homo sapie	0.00273131	10.0695	6802.41	12053666	1 (1 0 0 0 0)
unnamed protein product [Homo sapiens]	0.00131724	10.0694	29646.7	14042265	1 (1 0 0 0 0)
polyprotein [Human enterovirus B]	0.0029033	10.0689	22224.3	33391802	2 (1 1 0 0 0)
Ariadne protein (ARI) [Homo sapiens]	5.78536e-05	10.0688	54915.3	3925602	2 (1 0 1 0 0)
KIAA0732 protein [Homo sapiens]	0.00359314	10.0688	163011	14133213	1 (1 0 0 0 0)
FUS_HRSV1 Fusion glycoprotein F0 precursor [Contains: Fusion glycoprotein F2; F	0.00923537	10.0686	63648.1	138250	1 (1 0 0 0 0)
LOC642031 protein [Homo sapiens]	0.00238084	10.0685	31115.7	33877948	2 (0 1 0 0 1)
AF104938_1 lectomedin-1 beta [Homo sapiens]	0.000433595	10.0683	126081	5880492	1 (1 0 0 0 0)
envelope glycoprotein [Human immunodeficiency virus 1]	0.008164	10.0682	13052.6	30143402	2 (0 1 0 0 1)
rev protein [Human immunodeficiency virus 1]	0.00429367	10.0673	13312.8	45360204	1 (1 0 0 0 0)
pol protein [Human immunodeficiency virus 1]	0.00975084	10.0673	57277.3	42717494	1 (1 0 0 0 0)
ORF 66 [Human herpesvirus 8 type M]	0.00111992	10.0672	46992.3	18846036	1 (1 0 0 0 0)
microtubule affinity-regulating kinase-like1 [Homo sapiens]	0.00541643	10.0664	82408.4	21743250	1 (1 0 0 0 0)
envelope glycoprotein [Human immunodeficiency virus 1]	0.000128942	10.0657	25348.6	18537554	1 (1 0 0 0 0)
anti-human muscle acetylcholine receptor antibody heavy chain VDJ region	0.00975971	10.0654	13627.7	51034059	1 (1 0 0 0 0)
unnamed protein product [Homo sapiens]	0.00250451	10.0649	119537	34534877	1 (1 0 0 0 0)
neurogranin [Homo sapiens]	0.000562745	10.0648	7613.66	5453800	1 (1 0 0 0 0)
unnamed protein product [Homo sapiens]	5.76592e-05	10.0646	68230.2	34531084	1 (1 0 0 0 0)
unnamed protein product [Homo sapiens]	0.00661106	10.0646	163694	22761192	2 (0 1 0 0 1)
hypothetical protein DDBDRAFT_0169019 [Dictyostelium discoideum AX4]	0.00419604	10.0642	40915.3	66818589	1 (1 0 0 0 0)
envelope glycoprotein [Human immunodeficiency virus 1]	0.00140232	10.0642	12094.2	67944249	1 (1 0 0 0 0)
collectin sub-family member 11 isoform b [Homo sapiens]	0.00674468	10.0641	28986.9	40548420	2 (1 0 0 1 0)
envelope glycoprotein [Human immunodeficiency virus 1]	0.00692287	10.0641	24728.4	62905179	1 (1 0 0 0 0)
DNA polymerase [Human adenovirus type 4]	0.00941856	10.0638	135282	57115806	2 (0 1 0 0 1)
EKHUEX gamma-glutamyltransferase (EC 2.3.2.2) type 1 precursor [validated] - human	0.0022438	10.0633	61343.9	1360648	1 (1 0 0 0 0)
pol protein [Human immunodeficiency virus 1]	0.000103004	10.063	39279.8	108946748	1 (1 0 0 0 0)
unnamed protein product [Homo sapiens]	0.00637684	10.0628	59707	10439911	1 (1 0 0 0 0)
complement component 9 [Homo sapiens]	0.00817393	10.0625	63132.8	4502511	1 (1 0 0 0 0)
envelope glycoprotein V3 region [Human immunodeficiency virus type 1] [MA	0.00687479	10.0624	11474.9	6690923	1 (1 0 0 0 0)
mitochondrial glutamate carrier 1 [Homo sapiens]	0.000867955	10.0623	34448.3	13375983	1 (1 0 0 0 0)
pol polyprotein [Human immunodeficiency virus type 1]	0.00617172	10.0622	37418.9	10953317	1 (1 0 0 0 0)
envelope glycoprotein [Human immunodeficiency virus 1]	0.00917193	10.0615	16065.1	67089745	1 (1 0 0 0 0)
hCG1686415 [Homo sapiens]	0.000528838	10.0609	22345.5	119613096	2 (0 1 0 0 1)
KIAA1632 protein [Homo sapiens]	0.00267785	10.0608	165103	10047341	1 (1 0 0 0 0)
pol protein [Human immunodeficiency virus type 1] [	0.000255449	10.0607	44578	13604528	1 (1 0 0 0 0)
p53-associated parkin-like cytoplasmic protein [Homo sapiens]	0.00876226	10.0605	281047	24307991	2 (0 0 1 1 0)
TIM50_HUMAN Import inner membrane translocase subunit TIM50, mitochondrial pr	0.0023803	10.0605	39621.6	83305924	1 (1 0 0 0 0)
unnamed protein product [Homo sapiens]	0.00736779	10.0605	87829.1	10435899	1 (1 0 0 0 0)
immunoglobulin kappa light chain variable and constant region [Homo sapi	0.00471073	10.0602	12243	27818837	1 (1 0 0 0 0)
hypothetical protein [Homo sapiens]	0.00503956	10.0602	45745.9	30348701	1 (1 0 0 0 0)
MUCB_HUMAN Ig mu heavy chain disease protein (BOT)	0.000260093	10.0592	43030.3	127506	1 (1 0 0 0 0)
rap1GAPII [Homo sapiens]	0.0025167	10.059	14934.5	5816654	1 (1 0 0 0 0)
CN132_HUMAN Uncharacterized protein C14orf132	0.00190201	10.0581	19083.3	47605555	1 (1 0 0 0 0)
methyltransferase 5 domain containing 1 [Homo sapiens]	0.00535435	10.0576	30834.4	22749299	1 (1 0 0 0 0)
hypothetical protein [Homo sapiens]	0.0038325	10.0576	37090.9	51476982	1 (1 0 0 0 0)
non-metastatic cells 5, protein expressed in (nucleoside-diphosphate ki	0.00503858	10.0569	29276.9	119582567	2 (2 0 0 0 0)
PDZ binding kinase [Danio rerio]	0.0021944	10.0558	37639.8	50539842	1 (1 0 0 0 0)
X11L2 [Homo sapiens]	0.00418484	10.0549	39844.4	5706376	1 (1 0 0 0 0)
envelope protein [Human immunodeficiency virus 1] [	0.00238288	10.0548	10404.5	1429702	1 (1 0 0 0 0)
ribosomal protein S2 [Homo sapiens]	0.00961535	10.0547	25588.8	23491733	1 (1 0 0 0 0)
SNF1-like kinase [Homo sapiens]	9.82399e-05	10.0544	84848.6	116256471	2 (0 1 0 0 1)
envelope glycoprotein; gp120 [Human immunodeficiency virus type 1]	0.000684255	10.0541	8646.48	3242855	2 (1 0 0 1 0)
GRIA4_HUMAN Glutamate receptor 4 precursor (GluR-4) (GluR4) (GluR-D) (Glutamat	0.00785284	10.0538	100746	1346142	2 (0 1 0 0 1)
LOC642204 protein [Homo sapiens]	0.00991747	10.0537	16194.6	118341385	2 (0 1 0 0 1)
hCG2041133 [Homo sapiens]	0.00103921	10.0537	7902.95	119600720	1 (1 0 0 0 0)
virion protein US10 [Human herpesvirus 3]	0.00129627	10.0535	19855.6	9625938	1 (1 0 0 0 0)
DKFZP564O0823 protein [Homo sapiens]	0.00917364	10.0534	32268.8	54400758	1 (1 0 0 0 0)
unnamed protein product [Homo sapiens]	0.00734502	10.0532	15390.7	34530509	1 (1 0 0 0 0)
thiamin pyrophosphokinase 1 isoform a [Homo sapiens]	0.000150304	10.0532	27247.8	21362110	2 (0 0 1 1 0)
Orf1 [Homo sapiens]	0.00625445	10.0525	11367.2	1628563	1 (1 0 0 0 0)
nsp15 [Human coronavirus HKU1]	0.0023795	10.052	42748.7	85719074	1 (1 0 0 0 0)
interleukin 12 receptor, beta 2 precursor [Homo sapiens]	0.000408598	10.0501	97073.1	4504643	1 (1 0 0 0 0)
hCG1645842, isoform CRA_a [Homo sapiens]	0.00368875	10.0494	99243.2	119575055	1 (1 0 0 0 0)
AF349909_3 putative replication protein E1 [Human papillomavirus type 86]	0.00371786	10.049	73021.9	15741130	1 (1 0 0 0 0)
VP4_ROTHJ Outer capsid protein VP4 (Hemagglutinin) (Outer layer protein VP4) [C	0.00525533	10.0476	87195.6	267383	1 (1 0 0 0 0)
AF471447_1 Ig heavy chain variable region, VH3 family [Homo sapiens] [MAS	0.00683659	10.0473	13558.7	33319438	1 (1 0 0 0 0)
Pitpnm family member 3 isoform 1 [Mus musculus]	0.00823249	10.0456	106395	67972419	1 (1 0 0 0 0)
envelope glycoprotein [Human immunodeficiency virus 1]	0.00995026	10.0447	10865.5	62868558	1 (1 0 0 0 0)
CCDC63 protein [Homo sapiens]	0.00942384	10.0444	31679.5	112180480	2 (2 0 0 0 0)
envelope glycoprotein [Human immunodeficiency virus type 1]	0.00944757	10.0443	9796.18	15705689	1 (1 0 0 0 0)
A55144 autotaxin precursor - human	0.00763024	10.0437	105179	1082243	2 (0 0 1 1 0)
PO5FL_HUMAN POU domain, class 5, transcription factor 1-like protein 1 (Octam	0.00881105	10.0423	38545.5	28201858	2 (1 1 0 0 0)
tax protein [Human T-lymphotropic virus 1]	0.00266862	10.0357	1994.97	32811314	1 (1 0 0 0 0)
two pore segment channel 2, isoform CRA_a [Homo sapiens]	0.00547709	10.0332	55587	119595140	1 (1 0 0 0 0)
unnamed protein product [Homo sapiens]	0.00933609	10.0269	39070.8	22761477	1 (1 0 0 0 0)
gag protein [Human immunodeficiency virus 1]	0.000210471	8.17913	55119.2	90812182	3 (1 2 0 0 0)
neurofilament, light polypeptide 68kDa, isoform CRA_b [Homo sapiens] [M	0.000186042	8.16395	56924	119584005	1 (0 1 0 0 0)
Na,K-ATPase catalytic subunit alpha-A protein [Homo sapiens]	2.07793e-06	8.15938	3563.7	5919228	3 (0 3 0 0 0)
G-protein gamma-12 subunit [Homo sapiens]	0.0038088	8.15776	8001.17	51036603	1 (0 1 0 0 0)
POL precursor [Human immunodeficiency virus 1]	0.00637991	8.15045	60252.8	9756232	4 (1 3 0 0 0)
hypothetical protein DDBDRAFT_0167566 [Dictyostelium discoideum AX4]	0.00317451	8.14341	50433	66821635	3 (0 1 0 1 1)
late cornified envelope 3D [Homo sapiens]	0.00770259	8.14292	9437.07	14211869	1 (0 1 0 0 0)
hCG1773636 [Homo sapiens]	0.00930728	8.13726	20494.8	119578198	1 (0 1 0 0 0)
AF470976_1 pol polyprotein [Human immunodeficiency virus type 1]	0.0049547	8.13355	41160.8	21686054	1 (0 1 0 0 0)
hemoglobin beta chain [Homo sapiens]	3.45508e-09	8.129	11015.6	66731527	1 (0 1 0 0 0)
AF101459_1 envelope glycoprotein [Human immunodeficiency virus type 1] [MA	0.00249011	8.12466	37274.6	4754070	1 (0 1 0 0 0)
phosphatidylinositol 4-kinase type 2 beta [Homo sapiens]	0.00192897	8.12344	54719.8	8922869	1 (0 1 0 0 0)
fibroblast growth factor 9 precursor [Homo sapiens]	0.00957125	8.1182	23426	4503707	1 (0 1 0 0 0)
envelope glycoprotein [Human immunodeficiency virus 1]	0.000846955	8.11762	29520.3	38231024	3 (0 2 1 0 0)
B Chain B, Crystal Structure Of Human Hemoglobin E At 1.73 A Resolution	0.000736479	8.1166	15856.3	46014946	1 (0 1 0 0 0)
pol polyprotein [Human immunodeficiency virus 1] [	0.00632912	8.11605	45560	119720865	1 (0 1 0 0 0)
exterior membrane protein gp120 [Human immunodeficiency virus 1]	0.000130156	8.111	37847	7258468	2 (0 1 1 0 0)
U14 [Human herpesvirus 7]	0.00820453	8.11023	73859.1	51874237	1 (0 1 0 0 0)
protease [Human immunodeficiency virus 1]	0.00425451	8.10978	18948.1	109727388	1 (0 1 0 0 0)
actin-like protein [Homo sapiens]	0.000331541	8.10944	11548	62420916	1 (0 1 0 0 0)
AF161391_1 HSPC273 [Homo sapiens]	0.00323382	8.10801	25891.2	6841196	1 (0 1 0 0 0)
envelope glycoprotein [Human immunodeficiency virus type 1]	0.0021132	8.10638	9750.77	1842345	1 (0 1 0 0 0)
GPR83_HUMAN Probable G-protein coupled receptor 83 precursor (G-protein coupl	0.00092979	8.10548	48239.3	13878517	2 (1 1 0 0 0)
unnamed protein product [Homo sapiens]	0.00945358	8.1053	45008.2	22760848	2 (0 1 0 1 0)
gag-pol fusion polyprotein [Human immunodeficiency virus 1]	0.0033644	8.10528	65587.3	37934146	2 (0 1 0 0 1)
S22902 Ig kappa chain V region - human	0.00711086	8.10449	15568.7	106540	1 (0 1 0 0 0)
nef protein [Human immunodeficiency virus 1]	0.000759196	8.10419	23747.8	82571199	1 (0 1 0 0 0)
actin-like protein [Homo sapiens]	1.06798e-09	8.10297	11528.9	62421162	5 (0 3 2 0 0)
BAT3 [Homo sapiens]	0.00527111	8.10196	118629	15277262	1 (0 1 0 0 0)
KIAA1344 protein [Homo sapiens]	0.00147818	8.10101	97361.7	20521894	2 (0 0 1 0 1)
immunoglobulin kappa light chain variable region [Homo sapiens]	0.00882391	8.09934	11781.9	4378348	1 (0 1 0 0 0)
pol protein [Human immunodeficiency virus 1]	0.0048983	8.09868	18127.7	124299243	1 (0 1 0 0 0)
hCG1642453 [Homo sapiens]	0.00222192	8.0972	11989.8	119628456	1 (0 1 0 0 0)
S34775 nicotinic acetylcholine receptor epsilon chain precursor - human	0.00214605	8.09681	54581.4	479584	2 (0 1 1 0 0)
seven transmembrane helix receptor [Homo sapiens]	0.0067917	8.09647	91998.4	21929208	1 (0 1 0 0 0)
lysophosphatidylglycerol acyltransferase 1 [Homo sapiens]	0.00254911	8.09531	43061.3	7661996	2 (0 0 0 2 0)
hCG2036609, isoform CRA_c [Homo sapiens]	0.004852	8.09421	27597.1	119576562	2 (0 1 1 0 0)
Myomesin (M-protein) 2, 165kDa [Homo sapiens]	0.00120352	8.09291	164767	31418212	1 (0 1 0 0 0)
signal transducer and activator of transcription 3 isoform 1 [Homo sap	0.00135918	8.09286	88011.4	21618340	1 (0 1 0 0 0)
rev protein [Human immunodeficiency virus 1]	0.0015245	8.09172	13428.9	112351446	1 (0 1 0 0 0)
vpu protein [Human immunodeficiency virus 1]	0.00173589	8.09066	10121.5	73913955	1 (0 1 0 0 0)
sperm protein [Homo sapiens]	0.00586942	8.09033	95582.5	3004457	2 (0 0 0 2 0)
envelope glycoprotein [Human immunodeficiency virus 1]	0.000781707	8.09022	96773.1	116518619	1 (0 1 0 0 0)
reverse transcriptase [Human immunodeficiency virus 1]	0.00874112	8.08949	11925.3	89519465	1 (0 1 0 0 0)
UL146 [Human herpesvirus 5]	0.00366432	8.08896	13449.9	39841995	1 (0 1 0 0 0)
envelope glycoprotein [Human immunodeficiency virus 1]	0.000415612	8.08874	10370.6	29422932	2 (1 1 0 0 0)
pol protein [Human immunodeficiency virus 1]	0.00567864	8.08843	45948.5	111052922	1 (0 1 0 0 0)
hCG1989245 [Homo sapiens]	0.0041918	8.08835	73071.3	119600525	1 (0 1 0 0 0)
AF405815_1 envelope glycoprotein [Human immunodeficiency virus 1]	0.00339647	8.08817	37623.3	18650970	1 (0 1 0 0 0)
reverse transcriptase [Human immunodeficiency virus 1]	0.00759355	8.08812	22364.3	67081317	1 (0 1 0 0 0)
hypothetical protein LOC84066 [Homo sapiens]	0.00443621	8.08783	26516.6	14149781	1 (0 1 0 0 0)
unnamed protein product [Homo sapiens]	0.000232224	8.08768	92262.6	34533357	2 (0 1 0 1 0)
gag protein [Human immunodeficiency virus 1]	0.00253975	8.08762	14749.5	27801955	1 (0 1 0 0 0)
POLG_EC16H Genome polyprotein [Contains: Capsid protein VP4 (P1A) (Virion prot	0.00880311	8.08685	95337.6	6093761	2 (0 0 1 0 1)
chromosome 7 open reading frame 34, isoform CRA_b [Homo sapiens]	0.00658717	8.08573	16942.1	119572280	1 (0 1 0 0 0)
Rho GTPase activating protein [Homo sapiens]	0.00110672	8.08571	24988	25396407	1 (0 1 0 0 0)
RAB5C, member RAS oncogene family isoform b [Homo sapiens]	0.000413513	8.08463	23467.8	41393545	1 (0 1 0 0 0)
immunoglobulin heavy chain variable region [Homo sapiens]	0.00355503	8.08407	9577.8	11137203	1 (0 1 0 0 0)
MHC class I antigen [Homo sapiens]	0.000371898	8.08398	21156.4	45157139	2 (0 1 0 1 0)
hypothetical protein [Homo sapiens]	0.00810557	8.08369	134258	31874155	1 (0 1 0 0 0)
nicolin 1 [Homo sapiens]	0.000921347	8.08315	24186.2	14150084	1 (0 1 0 0 0)
polyglutamine binding protein variant 13 [Homo sapiens]	0.00501472	8.08312	18721.3	67508885	1 (0 1 0 0 0)
KIAA1867 protein [Homo sapiens]	0.00696109	8.08261	85258.1	14017951	1 (0 1 0 0 0)
FLJ00258 protein [Homo sapiens]	0.00982593	8.08221	88490.8	18676718	1 (0 1 0 0 0)
protein-serine/threonine kinase [Homo sapiens]	0.0079863	8.08209	7513	405737	1 (0 1 0 0 0)
C1TC_HUMAN C-1-tetrahydrofolate synthase, cytoplasmic (C1-THF synthase) [Includ	0.0028863	8.08084	101496	115206	5 (0 0 1 0 4)
vitelliform macular dystrophy 2-like 1 [Homo sapiens]	0.000263359	8.07973	57102	119703742	1 (0 1 0 0 0)
KIAA1377 protein [Homo sapiens]	0.00691487	8.07902	110564	7243135	1 (0 1 0 0 0)
envelope glycoprotein [Human immunodeficiency virus 1]	0.00817472	8.07852	96918.6	38491645	1 (0 1 0 0 0)
gag protein [Human immunodeficiency virus 1]	0.00629822	8.07807	17279.5	33088440	1 (0 1 0 0 0)
AF490513_1 envelope glycoprotein [Human immunodeficiency virus type 1] [M	0.00343313	8.07785	95931.2	19919760	1 (0 1 0 0 0)
anti-U1RNA Ig VL chain {clone R2} [human, serum, systemic lupus erythemat	0.00776948	8.07781	11373.3	1839495	1 (0 1 0 0 0)
A unnamed protein product [Homo sapiens]	0.00086335	8.07692	7959.63	119389370	1 (0 1 0 0 0)
Rieske (Fe-S) domain containing [Homo sapiens]	0.00518454	8.0769	17750.6	28603828	2 (0 0 1 0 1)
Similarity to HYPOTHETICAL PROTEINS YCD7_HUMAN [Encephalitozoon cunicu	0.00151186	8.07658	19199.6	19074705	2 (1 1 0 0 0)
envelope glycoprotein [Human immunodeficiency virus 1]	0.00856864	8.07577	31745.1	42493627	1 (0 1 0 0 0)
hypothetical protein [Homo sapiens]	0.00636122	8.07572	31930.5	12224880	1 (0 1 0 0 0)
gag protein [Human immunodeficiency virus 1]	0.00249971	8.07536	52362.7	124299202	1 (0 1 0 0 0)
L4 100 kDa hexon-assembly associated protein [Human adenovirus type 7] [	0.0056298	8.07522	91966.1	51173321	1 (0 1 0 0 0)
DKFZp566D244.1 hypothetical protein [Homo sapiens]	0.00061592	8.07513	28049.3	9368536	1 (0 1 0 0 0)
prion protein [Homo sapiens]	3.68077e-05	8.07461	26866.9	29568940	1 (0 1 0 0 0)
protein 7 [Human rotavirus]	0.00781744	8.07413	6635.03	23198438	1 (0 1 0 0 0)
immunoglobulin heavy chain variable region [Homo sapiens]	0.00180165	8.07406	10570.1	112702555	1 (0 1 0 0 0)
envelope glycoprotein [Human immunodeficiency virus type 1]	0.000546862	8.07375	15639.5	13625226	1 (0 1 0 0 0)
pol protein [Human immunodeficiency virus 1]	0.00148883	8.07348	38461.3	29409175	1 (0 1 0 0 0)
KIAA1772, isoform CRA_c [Homo sapiens]	0.00191621	8.07238	214330	119621529	1 (0 1 0 0 0)
human immunodeficiency virus type I enhancer binding protein 2 [Mus mus	0.00146116	8.07232	266547	148671544	1 (0 1 0 0 0)
envelope glycoprotein [Human immunodeficiency virus 1]	0.00224709	8.07215	39579.9	61741702	1 (0 1 0 0 0)
immunoglobulin heavy chain variable region [Homo sapiens]	0.000216135	8.07192	13032.5	95101742	1 (0 1 0 0 0)
dehydrodolichyl diphosphate synthase isoform b [Homo sapiens]	0.00961893	8.07171	38632.9	45580738	2 (0 0 1 0 1)
envelope glycoprotein [Human immunodeficiency virus 1]	0.00621896	8.07148	36723.3	27763093	1 (0 1 0 0 0)
hCG1685763 [Homo sapiens]	0.000774159	8.07106	18777.2	119579904	1 (0 1 0 0 0)
unnamed protein product [Homo sapiens]	0.00318058	8.07101	15792.3	34531159	1 (0 1 0 0 0)
envelope glycoprotein [Human immunodeficiency virus 1]	0.00628832	8.06961	96788.7	36365514	1 (0 1 0 0 0)
immunoglobulin gamma heavy chain variable region [Homo sapiens]	0.000791474	8.06946	12888.6	5051230	1 (0 1 0 0 0)
KIAA1979 protein [Homo sapiens]	0.00458219	8.06902	35773.1	18916873	1 (0 1 0 0 0)
WD repeat domain 33 isoform 2 [Homo sapiens]	0.00329564	8.0683	38269.3	55743157	1 (0 1 0 0 0)
pol polyprotein [Human immunodeficiency virus type 1]	0.00424579	8.06799	36846.5	13736694	1 (0 1 0 0 0)
complement factor H-related 5 [Homo sapiens]	0.00997072	8.06753	67358.7	55663312	1 (0 1 0 0 0)
spermatogenesis associated 18 homolog [Homo sapiens]	0.000667747	8.06707	61071	21687119	1 (0 1 0 0 0)
nef protein [Human immunodeficiency virus 1]	0.00531447	8.06626	23458.6	56608924	1 (0 1 0 0 0)
PR domain containing 1, with ZNF domain [Homo sapiens]	0.00487983	8.06513	23188.1	56205357	1 (0 1 0 0 0)
capsid protein [Human echovirus 30]	0.0056926	8.06483	33004.2	4581985	1 (0 1 0 0 0)
envelope glycoprotein [Human immunodeficiency virus 1]	0.00411446	8.06447	97509.9	90993751	1 (0 1 0 0 0)
envelope glycoprotein [Human immunodeficiency virus 1]	0.00426933	8.06391	11686.6	126023910	1 (0 1 0 0 0)
envelope glycoprotein [Human immunodeficiency virus 1]	0.00269735	8.06385	24113	31872945	1 (0 1 0 0 0)
unnamed protein product [Homo sapiens]	0.00178958	8.06383	23023	22760910	2 (0 2 0 0 0)
envelope glycoprotein gp120 [Human immunodeficiency virus 1]	0.00470924	8.06374	21503.7	85663605	1 (0 1 0 0 0)
[Human immunodeficiency virus type 1 (A04-7) partial cds.], gene product [	0.00159166	8.06219	10782.8	326189	1 (0 1 0 0 0)
hypothetical protein [Homo sapiens]	0.00548723	8.06211	73767.8	51476781	1 (0 1 0 0 0)
protein IVa2 [Human adenovirus B]	0.00160126	8.06166	50843.8	31540437	1 (0 1 0 0 0)
envelope glycoprotein [Human immunodeficiency virus type 1]	0.00468322	8.06158	10642.6	3832137	1 (0 1 0 0 0)
hypothetical protein [Homo sapiens]	0.00279299	8.06135	12901	57997584	2 (0 1 0 0 1)
hypothetical protein [Homo sapiens]	0.000817241	8.06058	30394.9	57997487	1 (0 1 0 0 0)
U31, large tegument protein [Human herpesvirus 6A]	0.00164775	8.05997	239794	9628333	1 (0 1 0 0 0)
pol protein [Human immunodeficiency virus 1]	0.00975084	8.05979	57168.4	42717076	1 (0 1 0 0 0)
ryanodine receptor 3, isoform CRA_a [Homo sapiens]	0.00368369	8.05964	358794	119612682	1 (0 1 0 0 0)
unnamed protein product [Homo sapiens]	0.00862238	8.05951	38659.5	22761784	1 (0 1 0 0 0)
LOC130940 protein [Homo sapiens]	0.00420384	8.05949	53103.1	77748412	1 (0 1 0 0 0)
piwi-like 1 [Homo sapiens]	0.00085479	8.05935	98541	66346725	1 (0 1 0 0 0)
unnamed protein product [Homo sapiens]	0.00595239	8.05898	47504.1	21758510	2 (0 0 0 2 0)
envelope glycoprotein [Human immunodeficiency virus 1]	0.00435894	8.05545	13747.8	32186402	1 (0 1 0 0 0)
envelope glycoprotein [Human immunodeficiency virus type 1]	0.00339567	8.05512	21489.7	13506295	1 (0 1 0 0 0)
leucine rich repeat and fibronectin type III domain containing 4 [Homo	0.00429279	8.05495	66818.5	27363458	1 (0 1 0 0 0)
polymerase (RNA) I polypeptide D isoform 2 [Homo sapiens]	0.00932462	8.05363	14323.3	22749407	1 (0 1 0 0 0)
diffuse panbronchiolitis critical region 1 [Homo sapiens]	0.00389429	8.05326	157752	119623756	2 (0 0 1 0 1)
envelope glycoprotein [Human immunodeficiency virus 1]	0.005851	8.05244	7544.99	27413357	2 (0 0 1 0 1)
immunoglobulin heavy chain variable region [Homo sapiens]	0.00824253	8.05197	13744.9	4838087	1 (0 1 0 0 0)
antithrombin [Homo sapiens]	0.00801001	8.05112	13778.8	23978644	1 (0 1 0 0 0)
hCG23500, isoform CRA_a [Homo sapiens]	0.00813238	8.05104	5986.99	119589596	1 (0 1 0 0 0)
AF151875_1 CGI-117 protein [Homo sapiens]	0.00393505	8.04947	21135.1	4929703	1 (0 1 0 0 0)
MOV10-like 1 [Homo sapiens]	0.00278638	8.04847	135207	14251207	2 (0 0 1 0 1)
D4, zinc and double PHD fingers family 2 [Homo sapiens]	0.00626521	8.04828	44127.2	5454004	2 (0 0 1 0 1)
growth arrest-specific 8 [Homo sapiens]	0.00124483	8.04827	56320.7	4503917	1 (0 1 0 0 0)
RMI1, RecQ mediated genome instability 1, homolog [Homo sapiens]	0.0028198	8.04826	70031.4	13376427	1 (0 1 0 0 0)
putative L1 protein [Human papillomavirus type 57b] [	0.00547748	8.04784	57246.1	1845203	1 (0 1 0 0 0)
envelope glycoprotein [Human immunodeficiency virus 1]	0.00109183	8.04771	26166.3	73336891	1 (0 1 0 0 0)
hCG1651346 [Homo sapiens]	0.00231076	8.04646	21119	119625537	1 (0 1 0 0 0)
SH2 domain containing 6 [Homo sapiens]	0.00687762	8.04536	19266.8	38348280	1 (0 1 0 0 0)
wee1 tyrosine kinase [Homo sapiens]	0.00587564	8.04259	71552.8	4507917	1 (0 1 0 0 0)
A57119 aquaporin 3 - human	0.00272349	8.04041	31451.3	1362754	1 (0 1 0 0 0)
G02426 interleukin-1 receptor-related protein - human	0.00699109	8.03802	63940.8	7447749	1 (0 1 0 0 0)
AF174394_1 apoptotic-related protein PCAR [Homo sapiens]	0.00477729	8.03251	16498.1	5802907	1 (0 1 0 0 0)
ryanodine receptor type 3 [Homo sapiens]	0.000746487	6.11404	22952.2	405719	3 (0 1 1 0 1)
envelope glycoprotein [Human immunodeficiency virus 1]	0.00244019	6.10906	96593.7	90993623	2 (1 0 1 0 0)
F-box protein 47 [Homo sapiens]	0.0055286	6.0839	51961.8	56912189	2 (0 0 0 1 1)
gp105 [Human immunodeficiency virus 2]	0.00741494	6.08206	12503.2	12697394	2 (0 0 0 1 1)
immunoglobulin heavy chain [Homo sapiens]	0.00951939	6.07714	12180.9	29837007	2 (0 0 0 1 1)
unnamed protein product [Homo sapiens]	0.00976966	6.07155	67078.1	7020351	2 (0 1 1 0 0)
AF474991_1 G protein-coupled receptor SNSR5 [Homo sapiens]	0.00231179	6.07081	36399.5	19338916	2 (0 0 0 1 1)
polo-like kinase [Homo sapiens]	0.00661209	6.06718	68211.7	21359873	2 (1 0 1 0 0)
mitochondrial ribosomal protein S15 [Homo sapiens]	0.00875701	6.06661	29823.5	16554611	2 (0 0 0 1 1)
polyprotein [Human calicivirus strain Mc37]	0.00224851	6.06119	189003	44829135	2 (0 0 0 1 1)
glutamate decarboxylase-like 1 [Homo sapiens]	0.000107096	6.05987	38482.5	46409350	2 (0 0 0 1 1)
sphingosine kinase 2 [Homo sapiens]	0.00164063	6.04965	69173.9	21361699	2 (0 0 0 1 1)
envelope glycoprotein [Human immunodeficiency virus 1]	0.00197796	4.11864	12120.4	28916314	2 (0 0 0 0 2)
Polyadenylate binding protein, human types 1, 2, 3, 4 [Medicago truncatu	0.00305685	4.10904	46043	92877413	2 (0 0 0 0 2)
G protein-coupled receptor kinase 4, isoform CRA_d [Homo sapiens]	0.00908649	4.09934	27854.5	119602888	2 (0 0 0 0 2)
PDZ domain containing RING finger 3 [Homo sapiens]	0.00061909	4.08645	119521	57529737	2 (0 0 0 0 2)
envelope glycoprotein gp120 [Human immunodeficiency virus 1]	0.00744377	4.07416	22960.3	85663155	2 (0 0 0 0 2)
mitochondrial ribosomal protein S6 [Homo sapiens]	0.00223535	4.06233	18347.7	13620885	2 (0 0 0 0 2)
pol protein [Human immunodeficiency virus 1]	0.00975084	4.05908	57083.4	42717862	2 (0 0 0 0 2)
vif [Human immunodeficiency virus 1]	0.00860137	2.13099	22637.8	3287159	2 (1 0 0 0 1)
envelope glycoprotein [Human immunodeficiency virus type 1]	0.00702909	2.10863	18220.2	7208032	2 (0 1 0 0 1)
hCG41809 [Homo sapiens]	0.00127079	2.07301	12280.3	119569936	2 (0 1 0 0 1)
