# Supplementary material for: ER stress induced immunopathology involving complement in CADASIL: implications for therapeutics
Source: Acta Neuropathol Commun. 2023 May 8;11:76. doi: 10.1186/s40478-023-01558-1 (PMC10169505; doi:10.1186/s40478-023-01558-1)
Supplement: Supplementary file 6 — Supplementary Material 6 [file 40478_2023_1558_MOESM6_ESM.xlsx]

## Sheet: CADASIL_1_UT
ER Stress Induced Immunopathology involving Complement in CADASIL: Implications for Therapeutics
Mahmod Panahi, Yoshiki Hase, Xavier Gallart-Palau, Sumonto Mitra, Atsushi Watanabe, Roger C Low, Yumi Yamamoto, Diego Sepulveda-Falla, Atticus H Hainsworth, Masafumi Ihara, Siu Kwan Sze, Matti Viitanen, Homira Behbahani, Raj N Kalaria
Supplementary information
Supplementary dataset 5: List of total proteins identified by LC-MS/MS in UT fractions of CADASIL subjects. Each tab referes to the total proteins identified in each individual.
Description	P-value	Score	MW	Accession	Peptide (Hits)
2',3'-cyclic-nucleotide 3'-phosphodiesterase (EC 3.1.4.37)	2.1869e-10	254.264	45070.4	180687	61 (53 5 1 2 0)
I38369 beta-tubulin - human (fragment)	1.52373e-10	242.292	48848.5	2119276	97 (83 11 2 1 0)
novel protein similar to human titin (TTN) [Danio rerio]	0.00553564	186.083	2437322	94732358	29 (5 11 5 4 4)
glial fibrillary acidic protein [Homo sapiens]	4.48974e-09	172.189	49849.7	4503979	22 (17 2 1 1 1)
tubulin alpha 6 [Homo sapiens]	1.08579e-09	146.25	49863.5	14389309	67 (57 5 2 1 2)
tubulin, beta 4 [Homo sapiens]	2.46731e-09	136.305	49553.9	21361322	84 (63 13 4 2 2)
N-ethylmaleimide-sensitive factor [Homo sapiens]	3.52582e-06	136.204	82602.2	11079228	18 (15 1 1 0 1)
neurofilament, light polypeptide 68kDa [Homo sapiens]	1.69283e-08	122.186	61479.3	105990539	20 (17 0 2 0 1)
ATP synthase, H+ transporting, mitochondrial F1 complex, alpha subunit	2.99021e-10	120.209	59713.7	4757810	21 (20 0 0 1 0)
brain creatine kinase [Homo sapiens]	3.40808e-09	96.275	42617.4	21536286	20 (19 0 1 0 0)
tubulin, beta, 4 [Homo sapiens]	1.20903e-12	94.2365	50400.3	50592996	28 (15 6 3 3 1)
myelin basic protein isoform 1 [Homo sapiens]	1.56418e-06	94.1496	21480	68509930	26 (16 6 2 2 0)
proteolipid protein [Rattus norvegicus]	2.80402e-07	92.1961	30057.1	13591880	37 (30 5 0 1 1)
voltage-dependent anion channel 1 [Homo sapiens]	1.83416e-09	88.1767	30753.6	4507879	11 (9 1 1 0 0)
KIAA0417 [Homo sapiens]	2.41696e-11	86.2089	78381.4	2887409	9 (7 2 0 0 0)
syntaxin binding protein 1 isoform a [Homo sapiens]	3.54153e-09	86.1415	68692.3	4507297	11 (9 0 1 0 1)
tubulin, alpha-like 3 [Homo sapiens]	4.23306e-06	84.133	49876.8	13376181	25 (20 2 1 2 0)
neurofilament, medium polypeptide 150kDa [Homo sapiens]	3.77115e-10	80.1861	102386	4885513	12 (11 1 0 0 0)
A40671 dynamin, internal form 1, long C-terminal form - human [M	9.31885e-12	78.3197	97201	539580	12 (10 0 1 0 1)
crystallin, alpha B [Homo sapiens]	4.23784e-08	78.2065	20146.4	4503057	12 (11 1 0 0 0)
Na+/K+ -ATPase alpha 1 subunit isoform a proprotein [Homo sapiens]	8.18685e-09	78.1675	112824	21361181	8 (7 1 0 0 0)
contactin 1 isoform 1 precursor [Homo sapiens]	2.98993e-07	70.1892	113249	28373117	7 (7 0 0 0 0)
A Chain A, Crystal Structure Of A DictyosteliumTETRAHYMENA CHIMERA Actin (Mutan	1.50505e-09	70.1541	41719.9	7245526	11 (6 3 2 0 0)
brain abundant, membrane attached signal protein 1 [Homo sapiens]	4.83713e-10	68.2221	22680	30795231	7 (6 1 0 0 0)
ATRB actin, skeletal muscle - rabbit	1.81721e-05	66.1705	41789.8	71611	11 (8 3 0 0 0)
tubulin, beta 2 [Homo sapiens]	2.83321e-08	64.1962	49875	4507729	18 (15 2 1 0 0)
unknown [Homo sapiens]	3.7666e-09	64.1912	268547	62988842	7 (5 1 1 0 0)
GNAO2_HUMAN Guanine nucleotide-binding protein G(o) subunit alpha 2	2.08244e-08	64.1818	40061.1	60416433	8 (7 0 0 1 0)
microtubule-associated protein 1B isoform 1 [Homo sapiens]	6.73509e-07	62.1924	270452	5174525	7 (5 1 0 1 0)
KIAA0820 protein [Homo sapiens]	1.4505e-08	60.2822	99887.1	20521666	10 (7 2 0 0 1)
tubulin, alpha 1B [Mus musculus]	3.96128e-12	60.2663	50119.6	34740335	27 (27 0 0 0 0)
voltage-dependent anion channel 3 [Homo sapiens]	5.07314e-06	60.2397	30639.3	25188179	9 (5 3 0 1 0)
KIAA0968 protein [Homo sapiens]	2.32535e-09	60.2051	58985.2	4589580	11 (10 0 1 0 0)
VDAC2 [Homo sapiens]	6.32917e-09	58.1224	30393	48146045	7 (6 1 0 0 0)
eukaryotic translation elongation factor 1 alpha 1 [Homo sapiens]	2.94449e-06	56.1386	50109.2	4503471	7 (6 0 1 0 0)
Na+,K+ ATPase [Homo sapiens]	2.48368e-11	50.247	111901	1359715	6 (5 0 0 1 0)
Na+/K+ -ATPase beta 1 subunit isoform a [Homo sapiens]	0.000237539	50.1504	35038.9	4502277	6 (6 0 0 0 0)
RYR2_HUMAN Ryanodine receptor 2 (Cardiac muscle-type ryanodine receptor) (RyR	0.00517667	50.1371	564136	17380312	6 (2 3 1 0 0)
solute carrier family 25 (mitochondrial carrier; adenine nucleotide tr	2.30482e-07	50.1356	33043.2	55749577	8 (5 1 0 0 2)
N Chain N, Mutant Monomer Of Recombinant Human Hexokinase Type I Complexed With	0.000352995	46.1336	102383	7245424	5 (4 0 1 0 0)
KIAA1708 [Homo sapiens]	0.00215166	44.0973	185022	30725047	6 (3 0 1 2 0)
unnamed protein product [Homo sapiens]	6.10617e-07	40.1861	49811	10433717	24 (7 8 7 2 0)
calcium/calmodulin-dependent protein kinase IIB isoform 8 [Homo sapien	1.47254e-07	40.1775	50923	26051218	4 (4 0 0 0 0)
collapsin response mediator protein 1 isoform 2 [Homo sapiens]	0.000166958	40.126	62144.8	4503051	6 (2 3 1 0 0)
sarco/endoplasmic reticulum Ca2+ -ATPase [Homo sapiens]	0.000168073	40.109	112442	3021396	5 (1 3 1 0 0)
ubiquinol-cytochrome c reductase core protein II [Homo sapiens]	0.00014072	40.1066	48412.9	50592988	5 (4 0 0 1 0)
TBB4Q_HUMAN Tubulin beta-4q chain	1.39571e-07	36.1779	48403.5	12643363	7 (3 3 1 0 0)
histone H2B [Homo sapiens]	6.27283e-05	36.1683	13927.6	1568557	8 (6 0 0 1 1)
proteoglycan PG-M(V3) [Homo sapiens]	0.00449444	36.092	74200.6	1008913	4 (2 2 0 0 0)
phosphofructokinase, platelet [Homo sapiens]	1.04537e-07	34.2173	85541.6	11321601	6 (2 0 1 1 2)
dihydropyrimidinase-like 2 [Homo sapiens]	4.48691e-07	34.1693	62254.7	4503377	6 (4 0 1 1 0)
internexin neuronal intermediate filament protein, alpha [Homo sapiens	0.00108365	34.0865	55357.5	14249342	4 (2 1 1 0 0)
DPYL4_HUMAN Dihydropyrimidinase-related protein 4 (DRP-4) (Collapsin response	0.00316845	32.146	61838.5	68067941	5 (2 2 0 1 0)
SMG5_HUMAN Protein SMG5 (SMG-5 homolog) (EST1-like protein B) (LPTS-interacti	0.00285177	32.0721	113855	84029494	4 (2 0 2 0 0)
guanine nucleotide-binding protein, beta-1 subunit [Mus musculus]	2.34005e-07	30.186	37353	6680045	4 (4 0 0 0 0)
neural cell adhesion molecule 1 isoform 3 [Homo sapiens]	7.74913e-07	30.1802	83718	115529478	3 (3 0 0 0 0)
heavy neurofilament subunit [Homo sapiens]	4.46661e-05	30.1593	111713	1841430	4 (2 1 0 0 1)
KIAA0987 protein [Homo sapiens]	4.1799e-05	30.1567	123629	4589618	5 (4 0 1 0 0)
AT2B4_HUMAN Plasma membrane calcium-transporting ATPase 4 (PMCA4) (Plasma mem	0.00224618	30.1338	137833	14286105	4 (2 1 0 0 1)
synapsin I isoform Ia [Homo sapiens]	7.89745e-05	30.132	74065.8	19924099	3 (3 0 0 0 0)
glyceraldehyde-3-phosphate dehydrogenase [Homo sapiens]	2.80572e-07	30.1256	36030.4	7669492	5 (3 1 0 0 1)
SHAN1_HUMAN SH3 and multiple ankyrin repeat domains protein 1 (Shank1) (Somat	0.00341386	30.1071	224880	22001988	6 (1 2 2 1 0)
TCOF1 [Homo sapiens]	0.00245457	30.0876	144226	1685049	4 (1 2 0 1 0)
hypothetical protein ( (L11645) alpha-tubulin [Homo sapiens] ) [Neuros	3.33067e-15	28.3373	10326.7	85091443	4 (2 0 1 0 1)
tubulin, beta, 2 [Homo sapiens]	6.10617e-07	28.1857	49799	5174735	17 (4 7 5 1 0)
protein kinase C, alpha [Homo sapiens]	2.43301e-06	28.1818	76714.2	4506067	4 (2 2 0 0 0)
DCLK1_HUMAN Serine/threonine-protein kinase DCLK1 (Doublecortin-like and CAM k	2.12029e-06	28.1504	82173	6225242	3 (2 1 0 0 0)
KIAA1736 protein [Homo sapiens]	0.000947402	28.0854	136142	12698017	4 (1 2 0 0 1)
hypothetical protein [Homo sapiens]	0.00942286	28.0576	99430.4	21732278	3 (2 1 0 0 0)
AF356519_1 axonemal dynein heavy chain 8 [Homo sapiens]	0.00136671	26.076	514485	14335444	6 (0 2 0 1 3)
novel protein similar to human talin 2 (TLN2) [Danio rerio]	0.00017778	26.0723	238195	55962543	5 (0 1 1 3 0)
AF363689_1 capicua protein [Homo sapiens]	0.0031765	26.0707	163689	14794910	3 (1 2 0 0 0)
bromodomain and WD repeat domain containing 3 variant BRWD3-B [Homo sapi	0.00871961	26.0509	184397	42766769	4 (1 0 2 1 0)
S68466 translation elongation factor EF-Tu-like protein P43 precursor, mitochondria	1.91743e-10	24.2183	49502.2	7443384	3 (2 0 0 1 0)
Thy-1 cell surface antigen [Homo sapiens]	5.35956e-07	24.1881	17923.3	19923362	9 (6 0 1 2 0)
R Chain R, Twinning In Crystals Of Human Skeletal Muscle D- Glyceraldehyde-3-Pho	0.0010668	24.0998	35853.3	230867	3 (1 1 1 0 0)
aminoadipate-semialdehyde synthase [Homo sapiens]	0.000765393	24.0751	102067	13027640	5 (0 2 1 1 1)
LIPB2_HUMAN Liprin-beta-2 (Protein tyrosine phosphatase receptor type f polyp	0.00812272	24.0592	98383.4	42558987	3 (2 0 0 1 0)
chondroitin sulfate glucuronyltransferase [Homo sapiens]	0.00393555	24.055	85094	51105925	3 (1 1 1 0 0)
mysoin heavy chain 12 [Homo sapiens]	8.09278e-05	22.1272	215196	1770741	4 (1 0 1 1 1)
clathrin heavy chain 1 [Homo sapiens]	1.01153e-05	22.1011	191492	4758012	4 (1 0 1 1 1)
hypothetical protein [Homo sapiens]	0.0010756	22.0784	61355.3	8671168	3 (0 2 1 0 0)
histone H2A [Homo sapiens]	5.02272e-08	20.2587	13986.8	28195394	5 (4 0 1 0 0)
tubulin, alpha 8 [Homo sapiens]	7.77156e-15	20.2366	50061.6	9507215	3 (2 0 0 0 1)
limbic system-associated membrane protein [Homo sapiens]	2.61967e-09	20.2269	37370.2	45594240	2 (2 0 0 0 0)
guanine nucleotide binding protein, alpha activating polypeptide O [Ho	4.73115e-10	20.2139	40024.9	10567816	2 (2 0 0 0 0)
myelin oligodendrocyte glycoprotein [Homo sapiens] [M	1.69206e-05	20.1784	28175	793839	3 (3 0 0 0 0)
beta actin [Homo sapiens]	1.64379e-08	20.1733	41709.7	4501885	4 (4 0 0 0 0)
ubiquitin and ribosomal protein L40 precursor [Homo sapiens]	0.000787287	20.1626	14719	4507761	2 (2 0 0 0 0)
KIAA0338 [Homo sapiens]	1.04797e-08	20.1616	103516	2224617	3 (1 1 0 0 1)
Cytochrome c oxidase subunit Va [Homo sapiens]	0.000190217	20.1452	16751.7	18999392	3 (3 0 0 0 0)
H1 histone family, member 0 [Homo sapiens]	0.000205368	20.1412	20850.2	4885371	2 (2 0 0 0 0)
unnamed protein product [Homo sapiens]	8.4707e-05	20.141	57919.5	28940	2 (2 0 0 0 0)
synaptosomal-associated protein 25 isoform SNAP25A [Homo sapiens]	4.00468e-06	20.13	23321.2	18765733	2 (2 0 0 0 0)
3-oxoacid CoA transferase 1 precursor [Homo sapiens]	4.63319e-05	20.1299	56122	4557817	3 (1 0 1 1 0)
claudin 11 [Homo sapiens]	1.27782e-05	20.1291	21978.4	10938016	2 (2 0 0 0 0)
GNAS complex locus isoform f [Homo sapiens]	0.00566306	20.1278	45723	117938762	4 (2 0 0 0 2)
tubulin, alpha 4 [Mus musculus]	4.70806e-07	20.1238	49892.4	6678467	4 (4 0 0 0 0)
SUCA_HUMAN Succinyl-CoA ligase [GDP-forming] subunit alpha, mitochondrial pre	0.000141138	20.1212	35025.2	20141765	2 (2 0 0 0 0)
NADH dehydrogenase (ubiquinone) 1 alpha subcomplex, 8, 19kDa [Homo sapi	0.000544113	20.1165	20092.1	7657369	2 (2 0 0 0 0)
KIAA1176 protein [Homo sapiens]	4.43526e-06	20.1161	121738	6330233	3 (1 1 0 0 1)
B46091 H+-exporting ATPase (EC 3.6.3.6) chain A, vacuolar (VA68 type) - human	0.000421562	20.0831	68204.5	1082432	2 (2 0 0 0 0)
chaperonin containing TCP1, subunit 5 (epsilon) [Homo sapiens]	0.000248014	20.0816	59632.9	24307939	3 (1 1 0 0 1)
MASP [Homo sapiens]	0.00180666	20.0808	79136.3	471128	3 (1 1 0 0 1)
multidomain protein with a conserved eukaryotic domain also present in	0.00686802	20.077	435855	66362318	4 (1 0 0 2 1)
M-phase phosphoprotein 1 [Homo sapiens]	0.000427071	20.0733	210499	55957272	3 (2 1 0 0 0)
lung specific F-box and DH domain containing protein [Homo sapiens] [MA	0.00185269	20.0719	96246.9	115493789	2 (2 0 0 0 0)
TDRD1_HUMAN Tudor domain-containing protein 1	0.000702906	20.0702	86707.2	17368689	2 (2 0 0 0 0)
tumor protein p53 binding protein, 1 [Homo sapiens]	0.0077095	20.0679	213441	5032189	3 (1 1 0 0 1)
LRP2_HUMAN Low-density lipoprotein receptor-related protein 2 precursor (Megal	0.00316454	20.0622	521588	6166537	2 (2 0 0 0 0)
isocitrate dehydrogenase (NADP+) [Homo sapiens] [MAS	0.00239463	20.0525	50915.9	872121	3 (1 1 0 0 1)
NMDA receptor subunit 3B [Homo sapiens]	0.00792413	20.051	112775	46277638	2 (2 0 0 0 0)
unnamed protein product [Homo sapiens]	1.91502e-11	18.2074	10747.9	32101	3 (1 2 0 0 0)
adaptor protein complex AP-2, mu1 [Mus musculus]	6.71685e-05	18.169	49623.1	6753074	3 (1 2 0 0 0)
Na+/K+ -ATPase alpha 2 subunit proprotein [Homo sapiens]	8.91264e-07	18.1655	112194	4502271	5 (2 0 2 0 1)
protein kinase C, gamma [Homo sapiens]	0.00016934	18.1607	78397.3	13384594	2 (1 1 0 0 0)
visinin-like 1 [Mus musculus]	7.07449e-08	18.1231	22128	6755983	2 (1 1 0 0 0)
KIAA0651 protein [Homo sapiens]	0.0054173	18.1017	124396	58257735	3 (1 1 0 1 0)
chaperonin [Homo sapiens]	0.00908707	18.0956	61016.5	31542947	3 (1 0 0 2 0)
protein kinase C, beta isoform 2 [Homo sapiens]	0.00368629	18.0953	76962.2	20127450	2 (1 1 0 0 0)
unnamed protein product [Homo sapiens]	0.00819134	18.089	77103.8	10435264	3 (1 0 1 0 1)
similar to t-complex 1; T-complex locus TCP-1; t-complex 1 (a murine tcp	0.000376319	18.0874	19812.7	51094756	10 (5 4 0 1 0)
cyclin-dependent kinase-like 2 [Homo sapiens]	0.00428673	18.0872	55982.9	4505569	3 (1 0 1 0 1)
envelope glycoprotein [Human immunodeficiency virus type 1]	0.000150225	18.0867	96522.5	17046829	2 (1 1 0 0 0)
huntingtin [Homo sapiens]	0.00285261	18.0847	347638	90903231	4 (1 0 0 3 0)
FIBP_ADE04 Fiber protein (pIV)	0.00362424	18.0821	45614.7	544295	2 (1 1 0 0 0)
75 kDa subunit NADH dehydrogenase precursor [Homo sapiens]	0.00567179	18.0788	79522.6	38079	3 (1 0 0 2 0)
envelope glycoprotein gp120 [Human immunodeficiency virus 1]	0.00980997	18.0775	20232	2276272	2 (1 1 0 0 0)
MTMR11 protein [Homo sapiens]	0.00500744	18.0746	76038.1	73487272	3 (2 1 0 0 0)
KIAA1069 protein [Homo sapiens]	0.00113432	18.0674	89113.3	5689475	2 (1 1 0 0 0)
envelope glycoprotein [Human immunodeficiency virus 1]	0.00961765	18.0672	20518.1	52695141	3 (1 1 0 1 0)
v-src sarcoma (Schmidt-Ruppin A-2) viral oncogene homolog (avian) [Homo	0.00873326	18.0669	60550.6	10635153	2 (1 1 0 0 0)
ODO2_HUMAN Dihydrolipoyllysine-residue succinyltransferase component of 2-oxog	2.03365e-05	16.1515	48609.5	1709442	2 (1 0 1 0 0)
envelope glycoprotein [Human immunodeficiency virus 1]	0.00017789	16.1291	98353.2	68522001	3 (1 0 2 0 0)
brain glycogen phosphorylase [Homo sapiens]	3.25287e-07	16.1146	96634.7	21361370	4 (1 0 0 0 3)
myelin associated glycoprotein isoform a precursor [Homo sapiens]	0.000219832	16.1019	69024.8	11225258	2 (1 0 1 0 0)
B-cell receptor-associated protein BAP29 isoform a [Homo sapiens]	0.00424266	16.1018	40770.6	56549093	2 (1 0 1 0 0)
heat shock 90kDa protein 1, beta [Homo sapiens]	0.00139278	16.0982	83212.2	20149594	4 (1 0 1 1 1)
TPX2, microtubule-associated protein homolog [Homo sapiens]	0.00193453	16.0845	85600.1	20127519	2 (0 2 0 0 0)
truncated envelope glycoprotein [Human immunodeficiency virus 1]	0.00705685	16.0777	63808.8	68521951	2 (1 0 1 0 0)
gp160 [Human immunodeficiency virus 1]	0.00720916	16.074	32937.2	1668728	2 (1 0 1 0 0)
hormonally upregulated Neu-associated kinase [Homo sapiens]	0.00236385	16.0721	79635.1	7657214	2 (1 0 1 0 0)
KIAA0083 [Homo sapiens]	0.0019986	16.068	122343	1531548	3 (1 0 0 1 1)
A Chain A, Crystal Structure Of Caenorhabditis Elegans Mg-Atp Actin Complexed	3.19605e-07	14.1328	41637.7	14278147	2 (1 0 0 1 0)
hypothetical protein [Homo sapiens]	2.10002e-05	14.1181	110722	52545742	3 (1 1 0 1 0)
S73539_1 Unknown [Homo sapiens]	0.0025579	14.1165	2923.54	4261831	4 (1 0 0 3 0)
de-ubiquitinase [Homo sapiens]	0.000485242	14.1044	95683.4	1122278	2 (1 0 0 1 0)
MYO10_HUMAN Myosin-X (Unconventional myosin-10)	0.00294687	14.0944	237240	17433142	2 (1 0 0 1 0)
orf1ab polyprotein [Human coronavirus HKU1]	0.00039918	14.0889	810416	56807324	2 (0 1 1 0 0)
SPTN5_HUMAN Spectrin beta chain, brain 4 (Spectrin, non-erythroid beta chain	0.00601603	14.0847	416577	17369320	3 (0 1 0 1 1)
structural protein VP1 [Rotavirus C]	0.00442127	14.0765	125722	81097460	2 (0 1 1 0 0)
cyclic nucleotide phophodiesterase	0.00170859	14.0733	124299	1145302	3 (0 0 1 2 0)
A44453 translation initiation factor eIF-4 gamma - human	0.00783209	14.0655	153342	346208	2 (1 0 0 1 0)
spermatogenesis associated 6 [Homo sapiens]	0.00399679	14.0647	55953.6	9506603	2 (0 1 1 0 0)
proprotein convertase subtilisin/kexin type 1 inhibitor precursor [Homo	0.00437031	14.0639	27355.8	7019519	2 (0 1 1 0 0)
olfactory receptor, family 13, subfamily C, member 5 [Homo sapiens]	0.00575277	14.0599	35771.9	52218854	2 (0 1 1 0 0)
hCG1747788 [Homo sapiens]	0.00775662	12.1783	14554.8	119608911	8 (0 0 5 3 0)
CE152_HUMAN Centrosomal protein of 152 kDa (Cep152 protein)	0.00122987	12.1618	147252	62286590	4 (0 1 3 0 0)
gp120 [Human immunodeficiency virus 1]	0.00900655	12.1225	23583.8	7414078	4 (1 1 0 0 2)
MYH14_HUMAN Myosin-14 (Myosin heavy chain 14) (Myosin heavy chain, nonmuscle	0.00699296	12.1103	227861	71151982	2 (0 1 0 1 0)
LRMP_HUMAN Lymphoid-restricted membrane protein (Protein Jaw1)	0.00305932	12.098	62054.2	73621178	2 (1 0 0 0 1)
KIAA0376 [Homo sapiens]	0.000486494	12.092	99802.8	2280485	4 (2 0 1 0 1)
UL97 [Human herpesvirus 5 strain AD169]	0.00383799	12.0902	78182.7	9625783	2 (0 0 2 0 0)
hypothetical protein LOC146325 [Homo sapiens]	0.00509829	12.09	59316.6	21687188	2 (0 0 2 0 0)
unnamed protein product [Homo sapiens]	0.0037737	12.0826	20049.1	21751413	2 (1 0 0 0 1)
syntaxin 18 [Homo sapiens]	0.00412404	12.0784	38649.7	8394376	2 (1 0 0 0 1)
envelope glycoprotein [Human immunodeficiency virus type 1]	0.00467039	12.0784	46201.3	1946868	2 (0 0 2 0 0)
zinc finger and BTB domain containing 25, isoform CRA_a [Homo sapiens]	0.00881683	12.0761	14968.4	119601265	2 (1 0 0 0 1)
Penton base [Human adenovirus type 46]	0.00366241	12.0743	58792.7	62177337	2 (0 1 0 1 0)
KIAA0830 protein [Homo sapiens]	0.000499469	12.0701	57165.6	4240149	2 (1 0 0 0 1)
CLH2_HUMAN Clathrin heavy chain 2 (CLH-22)	0.000456326	12.0697	186909	2506298	3 (0 0 0 3 0)
hypothetical protein [Homo sapiens]	0.00608122	12.0685	55115.4	12224896	2 (1 0 0 0 1)
alpha 1 type XXIV collagen precursor [Homo sapiens]	0.00895398	12.0545	175395	32364065	2 (1 0 0 0 1)
fas ligand [Homo sapiens]	0.000908438	12.0504	31464.1	4557329	2 (0 1 0 1 0)
ATS6_HUMAN ADAMTS-6 precursor (A disintegrin and metalloproteinase with throm	0.00729861	12.0448	97039.1	11131380	2 (0 1 0 1 0)
tubulin, alpha 1a [Mus musculus]	5.16966e-07	10.2215	49927.7	6678465	2 (2 0 0 0 0)
H2A histone family, member O [Homo sapiens]	1.04256e-05	10.198	14086.9	4504251	2 (2 0 0 0 0)
syntaxin 1B2 [Rattus norvegicus]	9.09929e-07	10.1969	33223.8	6981600	1 (1 0 0 0 0)
STX1B_HUMAN Syntaxin-1B1 (Syntaxin 1B)	3.9363e-08	10.1929	33410.1	2501085	1 (1 0 0 0 0)
SHPS1_HUMAN Tyrosine-protein phosphatase non-receptor type substrate 1 precur	3.61845e-06	10.1834	54778.7	29427656	1 (1 0 0 0 0)
calmodulin [Homo sapiens]	0.000184075	10.1717	17152	825635	1 (1 0 0 0 0)
cytochrome c oxidase subunit VIIa polypeptide 2 (liver) precursor [Homo	0.000840785	10.1615	9390.1	4502989	1 (1 0 0 0 0)
solute carrier family 25 member 3 isoform b precursor [Homo sapiens]	2.36357e-09	10.1612	39932.7	4505775	1 (1 0 0 0 0)
programmed cell death 10 [Homo sapiens]	0.00322608	10.1556	24685.8	20127517	3 (0 0 2 1 0)
pyruvate kinase 3 isoform 1 [Homo sapiens]	9.22922e-05	10.1452	57900.2	33286418	1 (1 0 0 0 0)
GDP dissociation inhibitor 1 [Homo sapiens]	0.00484597	10.1411	50550.2	4503971	1 (1 0 0 0 0)
tyrosine 3/tryptophan 5 -monooxygenase activation protein, zeta polypep	2.98521e-07	10.1409	27727.7	4507953	1 (1 0 0 0 0)
unactive progesterone receptor, 23 kD [Homo sapiens]	6.70696e-06	10.14	18685.4	23308579	1 (1 0 0 0 0)
vesicle-associated membrane protein 2 (synaptobrevin 2) [Homo sapiens]	0.000105859	10.1359	12640.7	7657675	3 (3 0 0 0 0)
NADH dehydrogenase (ubiquinone) 1 alpha subcomplex, 5 [Homo sapiens]	0.000218462	10.1355	13450.2	4826848	1 (1 0 0 0 0)
ras homolog gene family, member G [Mus musculus]	1.16888e-05	10.1302	21294.9	9625037	1 (1 0 0 0 0)
solute carrier family 25, member 5 [Homo sapiens]	2.11763e-08	10.1293	32874.2	4502099	1 (1 0 0 0 0)
unnamed protein product [Homo sapiens]	0.00969108	10.1229	55559.6	10438086	1 (1 0 0 0 0)
tubulin, beta 5 [Mus musculus]	0.00122562	10.1222	49639	7106439	4 (4 0 0 0 0)
guanine nucleotide binding protein (G protein), alpha inhibiting activi	3.93843e-05	10.1208	40425.1	4504041	1 (1 0 0 0 0)
G01650 malate dehydrogenase (EC 1.1.1.37), cytosolic - human [M	4.10526e-06	10.1206	36392	7431153	1 (1 0 0 0 0)
unnamed protein product [Homo sapiens]	0.000770278	10.1186	107971	34533231	1 (1 0 0 0 0)
C-type lectin domain family 3 member A [Homo sapiens]	0.000308956	10.1176	22218.5	148728186	5 (1 1 3 0 0)
RAB3C, member RAS oncogene family [Homo sapiens]	0.000747079	10.1147	25935.6	19923985	1 (1 0 0 0 0)
mutS homolog 4 [Homo sapiens]	0.00772312	10.1122	104689	36949366	3 (2 1 0 0 0)
anti-tetanus toxoid immunoglobulin light chain variable region [Homo sap	0.000326416	10.1105	11861.9	58222926	1 (1 0 0 0 0)
C17orf57 protein [Homo sapiens]	0.00308118	10.1103	59798.6	71297091	2 (1 0 1 0 0)
hypothetical protein [Homo sapiens]	0.000120645	10.1098	22204.3	6624942	1 (1 0 0 0 0)
aquaporin 4 isoform a [Homo sapiens]	4.33915e-07	10.1098	34806.9	4502181	1 (1 0 0 0 0)
ODP2_HUMAN Dihydrolipoyllysine-residue acetyltransferase component of pyruvate	8.69438e-07	10.1089	65739.4	3915777	1 (1 0 0 0 0)
OTU domain containing 7A [Homo sapiens]	0.00458026	10.1082	100615	18702331	3 (0 1 0 1 1)
seven transmembrane domain protein [Homo sapiens] [	5.76366e-06	10.1082	25433	3550427	1 (1 0 0 0 0)
FAM92A1 protein [Homo sapiens]	0.00200001	10.1058	35734.4	71052121	1 (1 0 0 0 0)
leucine-rich B7 protein isoform 1 variant [Homo sapiens]	0.00553666	10.1013	39746	62898802	1 (1 0 0 0 0)
envelope glycoprotein [Human immunodeficiency virus 1]	0.0026503	10.0975	22666.2	148628748	1 (1 0 0 0 0)
unnamed protein product [Homo sapiens]	0.00211642	10.0974	77665.6	7023639	2 (1 1 0 0 0)
Unknown (protein for IMAGE:3892831) [Homo sapiens]	0.0019616	10.0971	16257.6	116283526	1 (1 0 0 0 0)
NG5 protein [Homo sapiens]	0.00126246	10.0958	31410	77681565	1 (1 0 0 0 0)
DNA-binding protein [Homo sapiens]	0.0061694	10.0957	179966	2588783	2 (0 1 0 0 1)
envelope glycoprotein [Human immunodeficiency virus 1]	0.0090972	10.0955	10911.6	3721737	1 (1 0 0 0 0)
gelsolin isoform a precursor [Homo sapiens]	1.37712e-05	10.0954	85644.2	4504165	1 (1 0 0 0 0)
myelin basic protein isoform 4 [Homo sapiens]	0.000223476	10.0953	17332.8	68509932	2 (2 0 0 0 0)
heat shock protein 90kDa alpha (cytosolic), class A member 1 isoform 2	0.000468123	10.0939	84620.7	40254816	1 (1 0 0 0 0)
RAB3A, member RAS oncogene family [Homo sapiens]	0.00623461	10.0924	24968.1	4506367	1 (1 0 0 0 0)
hypothetical protein [Homo sapiens]	0.00716057	10.0907	195523	34365399	1 (1 0 0 0 0)
tat protein [Human immunodeficiency virus 1]	0.00333869	10.0905	11463.7	117581784	1 (1 0 0 0 0)
AF184491_1 gag protein [Human immunodeficiency virus type 1]	0.000199507	10.0892	28300.2	6815673	1 (1 0 0 0 0)
epidermal growth factor receptor pathway substrate 8 [Homo sapiens]	0.00101222	10.0889	91824.5	56682953	1 (1 0 0 0 0)
GNAS complex locus isoform e [Homo sapiens]	0.00528736	10.0866	67905.9	117938768	1 (1 0 0 0 0)
ORF 59 [Human herpesvirus 8 type M]	0.000336143	10.0866	42352.1	18846029	1 (1 0 0 0 0)
PLCB4_HUMAN 1-phosphatidylinositol-4,5-bisphosphate phosphodiesterase beta 4	0.00853801	10.0853	134378	17433757	3 (0 0 1 2 0)
immunoglobulin variable kappa chain [Homo sapiens]	0.00608964	10.0848	12451.1	95007527	1 (1 0 0 0 0)
histone H2A.2 [Homo sapiens]	2.09175e-05	10.0846	13898.5	31979	1 (1 0 0 0 0)
Coiled-coil domain containing 33 [Homo sapiens] [MA	0.00383228	10.0843	38249	19343579	1 (1 0 0 0 0)
M2GD_HUMAN Dimethylglycine dehydrogenase, mitochondrial precursor (ME2GLYDH)	0.0069974	10.0843	96745.8	11133608	1 (1 0 0 0 0)
hypothetical protein [Homo sapiens]	0.0037946	10.0836	41820.1	50949584	2 (1 1 0 0 0)
unnamed protein product [Homo sapiens]	0.00126516	10.0833	25215.2	28193116	1 (1 0 0 0 0)
muscle, skeletal, receptor tyrosine kinase [Homo sapiens]	0.00654144	10.0821	21119.8	55661867	1 (1 0 0 0 0)
envelope glycoprotein [Human immunodeficiency virus 1]	0.00740793	10.0817	24574.3	27451979	10 (4 4 0 1 1)
hCG2014367, isoform CRA_b [Homo sapiens]	0.00737324	10.0808	63600	119604070	1 (1 0 0 0 0)
hCG2010747 [Homo sapiens]	0.00422477	10.0805	11936.9	119579985	3 (2 0 0 1 0)
p21-activated kinase 4 isoform 1 [Homo sapiens]	0.000373295	10.0797	64032.3	5031975	2 (2 0 0 0 0)
envelope glycoprotein [Human immunodeficiency virus 1]	0.00203428	10.0791	9679.2	145342664	2 (1 0 1 0 0)
BTB (POZ) domain containing 8 [Homo sapiens]	0.00884137	10.0788	42746.6	34304113	1 (1 0 0 0 0)
Rho guanine nucleotide exchange factor 3 [Homo sapiens]	0.00542335	10.0768	59745.3	9506401	1 (1 0 0 0 0)
short stature homeobox isoform a [Homo sapiens]	0.000567818	10.0757	32216.3	4506943	1 (1 0 0 0 0)
WDR9 protein, form A [Homo sapiens]	0.00514671	10.0745	262764	14970562	1 (1 0 0 0 0)
KIAA1609 protein [Homo sapiens]	0.00241443	10.0735	52701	10047293	1 (1 0 0 0 0)
FYV1_HUMAN FYVE finger-containing phosphoinositide kinase (1-phosphatidylinos	0.00281978	10.0727	236957	47117931	1 (1 0 0 0 0)
immunoglobulin heavy chain variable region [Homo sapiens]	0.00658293	10.0722	10570.1	112702555	1 (1 0 0 0 0)
guanine nucleotide binding protein (G protein), gamma 7 [Homo sapiens]	0.00772392	10.0721	7516.95	32698769	1 (1 0 0 0 0)
Chain , Aldolase A (E.C.4.1.2.13)	0.000772818	10.0705	39264.3	229674	1 (1 0 0 0 0)
KIAA0548 protein [Homo sapiens]	0.00479099	10.0704	50050.9	3043620	2 (1 0 0 0 1)
CD59 antigen, complement regulatory protein, isoform CRA_a [Homo sapien	0.0020128	10.0692	17185.1	119588598	4 (1 0 2 1 0)
Homo sapiens protein tyrosine phosphatase, non-receptor type 11 (Noonan	0.00484006	10.0684	52907.6	30585107	1 (1 0 0 0 0)
E-1 enzyme, isoform CRA_a [Homo sapiens]	0.0050306	10.0676	10798.6	119626297	1 (1 0 0 0 0)
guanylate cyclase 1, soluble, alpha 2 [Homo sapiens]	0.00567108	10.0675	81697.7	4504211	2 (0 0 1 1 0)
lin-28 homolog B (C. elegans), isoform CRA_a [Homo sapiens]	0.00197299	10.0674	27886.8	119568818	1 (1 0 0 0 0)
AF175100_1 envelope glycoprotein [Human immunodeficiency virus type 1] [MA	0.00543672	10.066	9445.71	6003422	2 (1 0 1 0 0)
SALF protein [Homo sapiens]	0.0086848	10.0658	83028.2	111309209	1 (1 0 0 0 0)
AF255647_1 DC29 [Homo sapiens]	0.00954025	10.0652	14901.6	12005819	3 (1 1 0 0 1)
gp120 protein [Human immunodeficiency virus 1] [MA	0.00287374	10.0651	22723.3	27848173	2 (0 0 1 1 0)
acyl-Coenzyme A binding domain containing 5 [Homo sapiens]	0.00180303	10.0647	54751.6	21735487	1 (1 0 0 0 0)
forkhead box A2 [Homo sapiens]	0.00432723	10.0644	48274.8	11140813	1 (1 0 0 0 0)
unnamed protein product [Homo sapiens]	0.00175094	10.0642	27330.8	10436970	1 (1 0 0 0 0)
polymerase (RNA) I polypeptide A, 194kDa, isoform CRA_b [Homo sapiens]	0.00280677	10.0637	126805	119619874	1 (1 0 0 0 0)
matrix metalloproteinase 7 preproprotein [Homo sapiens]	0.00227741	10.0637	29657.9	4505219	1 (1 0 0 0 0)
AF326716_1 T cell receptor alpha chain [Homo sapiens]	0.00304709	10.0636	10993.2	13274441	2 (1 0 0 0 1)
tocopherol (alpha) transfer protein (ataxia (Friedreich-like) with vita	0.00728715	10.0632	31729.7	4507723	2 (1 1 0 0 0)
immunoglobulin heavy chain variable region [Homo sapiens]	0.00475063	10.0631	10896.4	112696341	1 (1 0 0 0 0)
pol protein [Human immunodeficiency virus 1]	0.00643067	10.0626	113561	87245358	1 (1 0 0 0 0)
B Chain B, Histocompatibility Antigen I-Ak	0.000921604	10.0625	21844.9	3114309	1 (1 0 0 0 0)
immunoglobulin heavy chain variable region [Homo sapiens]	0.00482704	10.0625	12515	4323664	4 (2 1 0 0 1)
heterogeneous nuclear ribonucleoprotein A2/B1 isoform A2 [Homo sapiens]	0.000205368	10.0622	35983.8	4504447	1 (1 0 0 0 0)
hCG2038361 [Homo sapiens]	0.00962903	10.062	21750.2	119626033	1 (1 0 0 0 0)
ISOC1 protein [Homo sapiens]	0.00616735	10.0617	25902.9	31416713	2 (0 0 1 1 0)
growth arrest-specific 2 like 2 [Homo sapiens]	0.00905512	10.0613	96459.8	21281675	1 (1 0 0 0 0)
neurotrimin isoform 1 [Homo sapiens]	0.00872175	10.061	37947.5	7705413	1 (1 0 0 0 0)
envelope glycoprotein [Human immunodeficiency virus 1]	0.00356454	10.0607	22979.6	38425837	3 (2 0 0 0 1)
unnamed protein product [Homo sapiens]	0.00859	10.0602	51999.6	21750728	1 (1 0 0 0 0)
envelope glycoprotein [Human immunodeficiency virus 1]	0.000125309	10.0599	8315.3	74476566	1 (1 0 0 0 0)
angiopoietin-like 4 protein isoform a precursor [Homo sapiens]	0.00625287	10.0587	45185.9	21536398	2 (2 0 0 0 0)
envelope glycoprotein [Human immunodeficiency virus 1]	0.00439461	10.0585	46509.3	34979222	1 (1 0 0 0 0)
immunoglobulin heavy chain variable region [Homo sapiens]	0.0052296	10.0579	11853.8	8249739	1 (1 0 0 0 0)
envelope glycoprotein [Human immunodeficiency virus 1]	0.00889108	10.0576	10457.6	87243410	1 (1 0 0 0 0)
thioredoxin domain containing 6 [Homo sapiens]	0.00144491	10.0568	29663.6	30023828	1 (1 0 0 0 0)
protein kinase C, theta [Homo sapiens]	0.00686268	10.0555	81810.8	5453976	1 (1 0 0 0 0)
FERM domain containing 1 [Homo sapiens]	0.000748903	10.0547	62484.5	24432020	1 (1 0 0 0 0)
glycoprotein 120 [Human immunodeficiency virus 1] [	0.00538713	10.0542	11150	5821505	1 (1 0 0 0 0)
nef protein [Human immunodeficiency virus type 1] [M	0.00375891	10.0537	23716.6	4102296	1 (1 0 0 0 0)
gag protein [Human immunodeficiency virus 1]	0.0041929	10.0524	14640.4	33578380	1 (1 0 0 0 0)
Chain , Human Sos1 Pleckstrin Homology (Ph) Domain, Nmr, 20 Structures	0.00158621	10.0502	15018.5	2982068	1 (1 0 0 0 0)
immunoglobulin heavy chain variable region [Homo sapiens]	0.00221141	10.049	12114.9	14289094	1 (1 0 0 0 0)
TUBB2C protein [Homo sapiens]	1.15006e-05	10.0477	25858.4	14124960	1 (1 0 0 0 0)
tight junction protein 2 (zona occludens 2) isoform 1 variant [Homo sap	0.00560584	10.0449	11882	62088840	1 (1 0 0 0 0)
hCG2040362 [Homo sapiens]	0.00770822	10.0442	11299.1	119589922	1 (1 0 0 0 0)
creatine kinase, mitochondrial 1B precursor [Homo sapiens]	0.00847347	10.04	47007.3	10334859	1 (1 0 0 0 0)
envelope glycoprotein [Human immunodeficiency virus type 1]	0.00197971	10.0299	22491.4	3549359	1 (1 0 0 0 0)
polyubiquitin [Homo sapiens]	0.000787287	8.16263	68450.1	2627129	1 (0 1 0 0 0)
unnamed protein product [Homo sapiens]	3.57429e-05	8.16154	40513	7021051	2 (0 2 0 0 0)
actin-like protein [Homo sapiens]	2.1032e-07	8.13345	11548	62420916	1 (0 1 0 0 0)
class IVb beta tubulin [Homo sapiens]	2.30946e-07	8.1305	49721	27368062	1 (0 1 0 0 0)
lipin 3 [Homo sapiens]	0.00145413	8.12245	93556.5	74271888	4 (0 4 0 0 0)
cytochrome b-5 isoform 1 [Homo sapiens]	0.00808299	8.11931	15320.5	41281768	1 (0 1 0 0 0)
tubulin, alpha-like 3 [Homo sapiens]	0.00117435	8.11626	49875.8	119606853	3 (2 1 0 0 0)
hypothetical protein LOC285175 [Homo sapiens]	0.00311902	8.10917	35582.9	32698998	1 (0 1 0 0 0)
KIAA1383 protein [Homo sapiens]	0.00463072	8.10845	100454	7243147	3 (0 1 0 0 2)
dedicator of cytokinesis 4, isoform CRA_d [Homo sapiens]	0.00821174	8.10753	166436	119603860	4 (0 4 0 0 0)
S34775 nicotinic acetylcholine receptor epsilon chain precursor - human	0.00163033	8.10666	54581.4	479584	1 (0 1 0 0 0)
ATP synthase, H+ transporting, mitochondrial F1 complex, beta subunit	0.00606048	8.10445	56524.7	32189394	3 (0 3 0 0 0)
unnamed protein product [Homo sapiens]	0.00442633	8.10293	29361.5	7020238	1 (0 1 0 0 0)
JE0243 Ig kappa chain NIG93 precursor - human	0.00614939	8.10062	23440.5	7438712	1 (0 1 0 0 0)
KIAA0570 protein [Homo sapiens]	0.00347463	8.09938	388908	20521085	1 (0 1 0 0 0)
unnamed protein product [Homo sapiens]	0.00139278	8.09819	35738.8	32486	1 (0 1 0 0 0)
ADP-ribosylation factor GTPase activating protein 1 isoform a [Homo sap	0.00228919	8.09561	44640.3	8922652	1 (0 1 0 0 0)
envelope glycoprotein [Human immunodeficiency virus 1]	0.00246453	8.08867	21180.7	19702702	1 (0 1 0 0 0)
nebulette sarcomeric isoform [Homo sapiens]	0.00882026	8.08782	116380	5453758	2 (0 0 0 2 0)
envelope glycoprotein [Human immunodeficiency virus type 1]	0.0010162	8.08726	97096	1079597	1 (0 1 0 0 0)
gp120 protein [Human immunodeficiency virus 1] [MA	0.00257265	8.08436	22318.2	27848205	3 (1 1 1 0 0)
p24 protein [Human immunodeficiency virus 1]	0.00079436	8.08417	23735.1	27848391	1 (0 1 0 0 0)
AF184354_1 gag protein [Human immunodeficiency virus type 1]	0.00732266	8.08377	18805.5	6815536	1 (0 1 0 0 0)
hCG1645235, isoform CRA_b [Homo sapiens]	0.00212327	8.08249	26510.1	119592769	1 (0 1 0 0 0)
envelope glycoprotein [Simian-Human immunodeficiency virus]	0.000899206	8.08238	87420.2	112818134	1 (0 1 0 0 0)
KIF3A_HUMAN Kinesin-like protein KIF3A (Microtubule plus end-directed kinesin	0.00705544	8.08229	80335.1	33112673	3 (0 1 1 0 1)
AF193277_7 tat protein [Human immunodeficiency virus type 1]	0.00042815	8.08119	9827.88	6651486	1 (0 1 0 0 0)
PAPD5_HUMAN PAP-associated domain-containing protein 5 (Topoisomerase-related	0.00349513	8.08117	63227.8	59800139	1 (0 1 0 0 0)
unnamed protein product [Homo sapiens]	0.00232696	8.08103	27528.8	10436240	5 (3 1 0 1 0)
hCG2036655 [Homo sapiens]	0.00458991	8.08022	13765.9	119630445	1 (0 1 0 0 0)
hCG33128, isoform CRA_b [Homo sapiens]	0.00788217	8.07879	78061.7	119628915	1 (0 1 0 0 0)
AF274938_1 PNAS-13 [Homo sapiens]	0.00692282	8.07778	9663.72	12751043	1 (0 1 0 0 0)
antithrombin III variant [Homo sapiens]	0.00439756	8.07737	52658	576554	1 (0 1 0 0 0)
gp105 [Human immunodeficiency virus 2]	0.000128792	8.07718	12423.5	12697404	1 (0 1 0 0 0)
acyl-Coenzyme A oxidase-like [Homo sapiens]	0.00661874	8.07319	42308.9	8922840	3 (0 0 1 2 0)
AF178971_1 small basic protein [Human calicivirus strain BAV/2.1/98/DEU] [	0.00639117	8.07268	8360.22	6010617	1 (0 1 0 0 0)
granulocyte-macrophage colony stimulating factor (GM-CSF) receptor alpha	0.00470858	8.07194	44474.5	522102	1 (0 1 0 0 0)
SIA7C_HUMAN Alpha-N-acetylgalactosaminide alpha-2,6-sialyltransferase 3 (GalN	0.00625796	8.07043	35371.8	48428651	4 (0 2 0 2 0)
hypothetical protein LOC84302 [Homo sapiens]	0.00768984	8.0702	46557.8	14150132	1 (0 1 0 0 0)
C6orf153 protein [Homo sapiens]	0.00620919	8.0696	29801.8	33989798	1 (0 1 0 0 0)
polyprotein [Human enterovirus B]	0.00471295	8.0693	7487.59	74179360	3 (0 2 1 0 0)
hypothetical rhabdomyosarcoma antigen MU-RMS-40.2A [Homo sapiens]	0.00369321	8.0688	47546.7	48476958	2 (0 1 0 0 1)
unnamed protein product [Homo sapiens]	0.00119592	8.06869	68807.7	7022475	1 (0 1 0 0 0)
hCG1783746 [Homo sapiens]	0.00438344	8.06839	39887.8	119621264	1 (0 1 0 0 0)
envelope glycoprotein [Human immunodeficiency virus 1]	0.00755571	8.06706	3740.83	115542486	1 (0 1 0 0 0)
fibromodulin [Homo sapiens]	0.00329521	8.06626	43124.6	453157	1 (0 1 0 0 0)
follistatin-like 1 precursor [Homo sapiens]	0.00402752	8.06603	34962.9	5901956	1 (0 1 0 0 0)
ubiquitin specific protease 24 [Homo sapiens] [M	0.00281019	8.06597	277237	149192845	1 (0 1 0 0 0)
capsid protein [Human astrovirus 4]	0.000678513	8.06372	85024.3	7415530	2 (0 0 0 2 0)
gag-pol polyprotein [Human immunodeficiency virus 1]	0.00901759	8.0627	98376	21671069	1 (0 1 0 0 0)
protease [Human immunodeficiency virus 1]	0.00643067	8.06246	15414.1	50658217	1 (0 1 0 0 0)
envelope glycoprotein [Human immunodeficiency virus 1]	0.0018951	8.06223	13544.9	42540097	1 (0 1 0 0 0)
novel protein similar to human breakpoint cluster region (BCR) [Danio r	0.00146635	8.06213	86348.8	37606127	2 (0 0 1 0 1)
envelope glycoprotein [Human immunodeficiency virus 1]	0.00121257	8.06191	24948.4	62905102	1 (0 1 0 0 0)
metalloprotease/disintegrin-like protein [Homo sapiens]	0.00113268	8.06185	57107.3	836684	1 (0 1 0 0 0)
T2R41_HUMAN Taste receptor type 2 member 41 (T2R41) (T2R59)	4.32501e-05	8.06106	35888.2	29839474	1 (0 1 0 0 0)
nuclear receptor subfamily 5, group A, member 2 isoform 1 [Homo sapien	0.00576485	8.06089	61291.8	45545405	1 (0 1 0 0 0)
hCG2036614, isoform CRA_a [Homo sapiens]	0.00218846	8.06033	103442	119604664	1 (0 1 0 0 0)
liver glycine methyltransferase [Homo sapiens] [MAS	0.00714588	8.05967	29248.5	1335203	1 (0 1 0 0 0)
envelope glycoprotein [Human immunodeficiency virus 1]	0.00575901	8.05919	95660.2	86753469	1 (0 1 0 0 0)
hCG20576 [Homo sapiens]	0.00343784	8.0587	11039.3	119577861	1 (0 1 0 0 0)
reverse transcriptase [Human immunodeficiency virus 1]	0.0053556	8.05839	30108.1	23954964	2 (0 1 0 0 1)
trafficking protein particle complex 3 [Homo sapiens]	0.00906964	8.05552	20261.2	7656926	1 (0 1 0 0 0)
unnamed protein product [Homo sapiens]	0.00541226	8.05531	25754.7	21758488	1 (0 1 0 0 0)
AF411819_1 putative ion channel protein CATSPER2 variant 3 [Homo sapiens]	0.00100021	8.05513	48310.3	16566359	1 (0 1 0 0 0)
hCG2039923 [Homo sapiens]	0.00114987	8.0544	11324.5	119578285	1 (0 1 0 0 0)
AF334945_1 FKSG43 [Homo sapiens]	0.00348149	8.05439	51132.2	12276204	1 (0 1 0 0 0)
vif protein [Human immunodeficiency virus type 1] [M	0.000108912	8.05299	22666	2853510	1 (0 1 0 0 0)
gag protein [Human immunodeficiency virus 1]	0.0041929	8.05243	54765	82571230	1 (0 1 0 0 0)
TM2 domain containing 3 [Homo sapiens]	0.00447107	8.05202	27143.3	13544029	1 (0 1 0 0 0)
KIAA1444 protein [Homo sapiens]	0.00133078	8.05103	45910.7	7959147	1 (0 1 0 0 0)
immunoglobulin heavy chain [Homo sapiens]	0.00280677	8.05075	41274.4	10334541	1 (0 1 0 0 0)
hCG2003109 [Homo sapiens]	0.00483582	8.04711	19963.3	119631116	1 (0 1 0 0 0)
hCG1642753 [Homo sapiens]	0.00515283	8.04681	12324.4	119595847	1 (0 1 0 0 0)
pol protein [Human immunodeficiency virus 1]	2.1897e-05	8.04664	42737.8	145982506	1 (0 1 0 0 0)
ENV_HV19N Envelope glycoprotein gp160 precursor (Env polyprotein) [Contains:	0.0038842	8.0465	96336.7	75573311	1 (0 1 0 0 0)
TNF receptor-associated factor 2 [Homo sapiens]	0.0071437	8.04568	55822.8	22027612	1 (0 1 0 0 0)
MPP3_HUMAN MAGUK p55 subfamily member 3 (Protein MPP3) (Discs large homolog 3)	0.00314248	8.04162	66127.1	2497512	1 (0 1 0 0 0)
unnamed protein product [Homo sapiens]	0.00429888	8.04044	32374.4	47077065	1 (0 1 0 0 0)
Ig heavy chain variable region [Homo sapiens]	0.00346454	8.03563	9016.31	3326968	1 (0 1 0 0 0)
anti-Rh(D) antibody immunoglobulin heavy chain variable region [Homo sap	0.00826343	8.03519	13863.8	93007648	1 (0 1 0 0 0)
hCG2032408, isoform CRA_f [Homo sapiens]	0.00758471	8.02785	164983	119587448	1 (0 1 0 0 0)
VP-1 capsid protein [Human poliovirus 1]	0.00562731	6.15705	10539.1	12231217	2 (1 0 1 0 0)
hypothetical protein [Human calicivirus Hu/NLV/Queen's Arms/Leeds/92/UK	0.00754687	6.13437	22089.1	14330431	2 (0 1 1 0 0)
glutamate transporter [Homo sapiens]	0.00425949	6.1281	61664.6	488752	7 (0 3 1 2 1)
reverse transcriptase [Human immunodeficiency virus type 1]	0.00468381	6.11627	64903.3	7144664	2 (0 0 0 1 1)
AACS protein [Homo sapiens]	0.00978037	6.11147	45607.8	71297231	4 (0 2 2 0 0)
AF166179_1 polyprotein [Human coxsackievirus A9]	0.00153512	6.10956	14925.1	6752481	5 (1 0 3 1 0)
polyprotein [Human rhinovirus 38]	0.000619717	6.09502	242749	95102506	5 (2 0 1 1 1)
dihydropyrimidinase [Homo sapiens]	0.00665155	6.08979	56593.8	4503375	2 (0 0 0 1 1)
envelope glycoprotein [Human immunodeficiency virus 1]	0.0010162	6.08465	97666.8	125661192	2 (0 0 0 1 1)
polyprotein 3BCD [Human coxsackievirus B3]	0.00121115	6.07835	30799.8	5705950	2 (0 0 0 1 1)
hypothetical protein CX157 [Homo sapiens]	0.000484697	6.07748	13360.8	14585847	2 (0 1 1 0 0)
hypothetical protein LOC388939 [Homo sapiens]	0.00689382	6.06628	139569	71274152	2 (0 0 0 1 1)
T cell receptor alpha chain [Homo sapiens]	0.00355481	4.14773	15778.1	1806100	5 (1 0 0 0 4)
gag protein [Human immunodeficiency virus 1]	0.00476807	4.14204	55119.2	90812182	3 (2 0 0 1 0)
AF141381_2 putative RNA-dependent RNA polymerase [Human astrovirus]	0.00260582	4.08255	60159.2	4731639	2 (1 0 0 1 0)
olfactory receptor, family 1, subfamily M, member 1 [Homo sapiens]	0.00062159	4.0695	34816.2	52218828	2 (1 0 0 1 0)
immunoglobulin heavy chain variable region [Homo sapiens]	0.00658489	4.05782	12431	70798578	5 (0 1 0 4 0)

## Sheet: CADASIL_2_UT
Reference	P (pro)	Score	MW	Accession	Peptide (Hits)
I38369 beta-tubulin - human (fragment)	4.10372e-11	238.239	48848.5	2119276	89 (76 8 3 1 1)
2',3'-cyclic-nucleotide 3'-phosphodiesterase (EC 3.1.4.37)	3.09783e-10	206.251	45070.4	180687	53 (42 5 5 0 1)
tubulin, beta 4 [Homo sapiens]	2.95916e-13	146.324	49553.9	21361322	105 (78 20 3 1 3)
tubulin alpha 6 [Homo sapiens]	1.92755e-10	120.229	49863.5	14389309	66 (63 2 0 0 1)
ATP synthase, H+ transporting, mitochondrial F1 complex, alpha subunit	9.81205e-07	100.185	59713.7	4757810	20 (18 1 1 0 0)
KIAA0417 [Homo sapiens]	6.17068e-06	100.153	78381.4	2887409	13 (12 1 0 0 0)
tubulin, beta, 4 [Homo sapiens]	1.35602e-09	98.2248	50400.3	50592996	32 (18 10 2 1 1)
N-ethylmaleimide-sensitive factor [Homo sapiens]	7.36253e-07	98.1652	82602.2	11079228	18 (16 0 1 0 1)
brain creatine kinase [Homo sapiens]	1.19655e-07	90.1712	42617.4	21536286	25 (22 3 0 0 0)
calcium/calmodulin-dependent protein kinase IIB isoform 8 [Homo sapien	7.82018e-05	82.1501	50923	26051218	13 (10 2 1 0 0)
voltage-dependent anion channel 1 [Homo sapiens]	2.76466e-05	76.1335	30753.6	4507879	11 (8 1 1 0 1)
tubulin, alpha 1B [Mus musculus]	7.61109e-10	70.2674	50119.6	34740335	31 (28 1 1 0 1)
ATRB actin, skeletal muscle - rabbit	2.6768e-07	66.1433	41789.8	71611	11 (7 3 1 0 0)
neurofilament, light polypeptide 68kDa [Homo sapiens]	1.93599e-05	66.1368	61479.3	105990539	12 (9 1 1 0 1)
A Chain A, Crystal Structure Of A DictyosteliumTETRAHYMENA CHIMERA Actin (Mutan	7.29999e-08	64.1554	41719.9	7245526	10 (6 3 1 0 0)
tubulin, alpha-like 3 [Homo sapiens]	0.000217065	64.1207	49876.8	13376181	24 (13 5 3 2 1)
VDAC2 [Homo sapiens]	2.16361e-06	56.1774	30393	48146045	7 (4 3 0 0 0)
N Chain N, Mutant Monomer Of Recombinant Human Hexokinase Type I Complexed With	0.000173318	56.1109	102383	7245424	6 (5 0 1 0 0)
phosphofructokinase, platelet [Homo sapiens]	3.00363e-10	54.1952	85541.6	11321601	7 (6 0 0 1 0)
proteolipid protein [Rattus norvegicus]	1.50683e-06	50.1601	30057.1	13591880	18 (16 1 1 0 0)
KIAA0987 protein [Homo sapiens]	0.000421313	50.1074	123629	4589618	6 (6 0 0 0 0)
GNAO2_HUMAN Guanine nucleotide-binding protein G(o) subunit alpha 2	2.94153e-08	48.1803	40061.1	60416433	8 (7 1 0 0 0)
unnamed protein product [Homo sapiens]	0.00023596	46.0921	57919.5	28940	6 (5 0 1 0 0)
neurofilament, medium polypeptide 150kDa [Homo sapiens]	1.90958e-13	44.2586	102386	4885513	6 (5 0 0 1 0)
RPGF2_HUMAN Rap guanine nucleotide exchange factor 2 (Neural RAP guanine nucl	0.00840082	44.0767	167312	34395737	5 (2 3 0 0 0)
B46091 H+-exporting ATPase (EC 3.6.3.6) chain A, vacuolar (VA68 type) - human	5.30499e-06	42.1164	68204.5	1082432	6 (5 0 0 0 1)
unnamed protein product [Homo sapiens]	2.08845e-08	40.2111	49811	10433717	17 (3 7 7 0 0)
tubulin, beta 2 [Homo sapiens]	3.69119e-07	40.1867	49875	4507729	15 (14 1 0 0 0)
eukaryotic translation elongation factor 1 alpha 1 [Homo sapiens]	3.35438e-07	36.1334	50109.2	4503471	5 (4 0 1 0 0)
crystallin, alpha B [Homo sapiens]	1.35856e-07	34.1474	20146.4	4503057	4 (3 0 0 1 0)
KIAA0968 protein [Homo sapiens]	2.45411e-05	32.1562	58985.2	4589580	10 (8 1 0 0 1)
Na+,K+ ATPase [Homo sapiens]	4.89447e-09	32.1526	111901	1359715	5 (4 0 0 0 1)
myelin basic protein isoform 1 [Homo sapiens]	0.00011628	32.1187	21480	68509930	4 (3 0 0 0 1)
syntaxin binding protein 1 isoform a [Homo sapiens]	4.34126e-08	30.161	68692.3	4507297	5 (5 0 0 0 0)
75 kDa subunit NADH dehydrogenase precursor [Homo sapiens]	0.000225629	30.1488	79522.6	38079	3 (3 0 0 0 0)
Na+/K+ -ATPase alpha 1 subunit isoform a proprotein [Homo sapiens]	1.25824e-06	30.1454	112824	21361181	3 (3 0 0 0 0)
A40671 dynamin, internal form 1, long C-terminal form - human [M	3.1356e-05	30.1314	97201	539580	5 (4 1 0 0 0)
protein kinase C, alpha [Homo sapiens]	0.00018801	30.1154	76714.2	4506067	4 (4 0 0 0 0)
contactin 1 isoform 1 precursor [Homo sapiens]	1.63152e-07	30.106	113249	28373117	3 (3 0 0 0 0)
TBB4Q_HUMAN Tubulin beta-4q chain	2.4918e-10	28.1805	48403.5	12643363	6 (2 3 0 0 1)
vacuolar H+ATPase B2 [Homo sapiens]	0.000158306	26.146	56465	19913428	4 (1 1 1 0 1)
DPYL4_HUMAN Dihydropyrimidinase-related protein 4 (DRP-4) (Collapsin response	0.00606205	24.1094	61838.5	68067941	5 (2 2 1 0 0)
A Chain A, Crystal Structure Of Caenorhabditis Elegans Mg-Atp Actin Complexed	0.000136242	24.1061	41637.7	14278147	3 (2 0 0 1 0)
AC015445_9 Contains strong similarity to rapamycin associated protein FRAP	0.00270584	24.0693	282733	8569097	3 (1 1 1 0 0)
tubulin, beta, 2 [Homo sapiens]	3.78585e-08	22.2105	49799	5174735	18 (6 6 6 0 0)
KIAA0820 protein [Homo sapiens]	1.84715e-05	22.1474	99887.1	20521666	3 (1 1 0 1 0)
ZN624_HUMAN Zinc finger protein 624	0.00253222	22.1172	85536.9	20140878	4 (0 2 0 1 1)
Na+/K+ -ATPase beta 1 subunit isoform a [Homo sapiens]	7.6951e-05	22.0901	35038.9	4502277	3 (2 0 0 0 1)
zinc finger protein 284 [Homo sapiens]	0.00390284	22.0867	68973.8	83716019	3 (1 0 2 0 0)
internexin neuronal intermediate filament protein, alpha [Homo sapiens	3.10311e-05	22.07	55357.5	14249342	3 (1 0 2 0 0)
IE1 [Human herpesvirus 5 strain AD169]	0.0055854	22.0571	55073.9	9625811	4 (1 0 1 1 1)
S68466 translation elongation factor EF-Tu-like protein P43 precursor, mitochondria	1.63851e-06	20.1734	49502.2	7443384	2 (2 0 0 0 0)
tubulin, alpha 4 [Mus musculus]	6.20259e-07	20.1598	49892.4	6678467	5 (5 0 0 0 0)
dihydropyrimidinase-like 2 [Homo sapiens]	2.41594e-07	20.1534	62254.7	4503377	4 (4 0 0 0 0)
Na+/K+ -ATPase alpha 2 subunit proprotein [Homo sapiens]	7.74405e-08	20.1523	112194	4502271	2 (2 0 0 0 0)
tyrosine 3-monooxygenase/tryptophan 5-monooxygenase activation protein,	1.00076e-07	20.1473	28284.9	9507245	8 (7 1 0 0 0)
creatine kinase, mitochondrial 1B precursor [Homo sapiens]	0.000906126	20.1388	47007.3	10334859	2 (2 0 0 0 0)
chaperonin [Homo sapiens]	1.77529e-05	20.109	61016.5	31542947	2 (2 0 0 0 0)
PREDICTED: glutaminase C isoform 4 [Pan troglodytes]	0.00370696	20.0969	73414	114582295	28 (6 5 3 8 6)
hypothetical protein ( (L11645) alpha-tubulin [Homo sapiens] ) [Neuros	9.24539e-09	20.0918	10326.7	85091443	2 (2 0 0 0 0)
microtubule-associated protein 1B isoform 1 [Homo sapiens]	0.00100761	20.0902	270452	5174525	3 (1 0 1 1 0)
unnamed protein product [Homo sapiens]	0.00168645	20.0761	46451	22760202	5 (0 1 1 2 1)
eukaryotic translation initiation factor 3, subunit 8, 110kDa [Homo sap	0.000623319	20.0519	105278	4503525	3 (0 2 0 1 0)
unnamed protein product [Homo sapiens]	7.80347e-05	18.1964	40513	7021051	9 (2 5 2 0 0)
histone H2B [Homo sapiens]	1.98798e-07	18.1823	13927.6	1568557	3 (2 1 0 0 0)
voltage-dependent anion channel 3 [Homo sapiens]	2.46957e-08	18.1745	30639.3	25188179	4 (2 0 0 2 0)
hCG1747788 [Homo sapiens]	0.00559942	18.1292	14554.8	119608911	9 (0 0 7 2 0)
CENPN_HUMAN Centromere protein N (CENP-N) (Interphase centromere complex prot	0.00497825	18.1029	39515.6	74731883	3 (0 1 1 1 0)
M-phase phosphoprotein 1 [Homo sapiens]	0.00243924	18.0836	210499	55957272	3 (1 0 1 0 1)
similar to t-complex 1; T-complex locus TCP-1; t-complex 1 (a murine tcp	6.68305e-05	18.0816	19812.7	51094756	7 (4 2 1 0 0)
PKU-beta [Homo sapiens]	0.00175723	18.0789	88827.2	2217933	2 (1 1 0 0 0)
unnamed protein product [Homo sapiens]	0.00358977	18.0786	56915.9	18676759	2 (1 1 0 0 0)
zinc finger CCCH-type containing 11A [Homo sapiens]	0.00597255	18.0616	89076.1	114842410	3 (0 2 0 0 1)
PI-3 kinase [Homo sapiens]	0.00194584	18.0505	181934	3954946	2 (1 1 0 0 0)
NOTC3_HUMAN Neurogenic locus notch homolog protein 3 precursor (Notch 3) [Con	0.00229734	18.0464	243493	20139284	2 (1 1 0 0 0)
tyrosine 3/tryptophan 5 -monooxygenase activation protein, zeta polypep	1.69206e-05	16.1225	27727.7	4507953	3 (2 0 1 0 0)
ATPase, H+ transporting, lysosomal, V0 subunit c [Homo sapiens]	5.1003e-06	16.1139	15725.5	4502313	2 (1 0 1 0 0)
hypothetical protein [Homo sapiens]	0.00811586	16.0873	39201.5	6453600	2 (0 2 0 0 0)
Similar to CG32662-PA [Homo sapiens]	0.00748159	16.0866	25287.9	47124243	2 (0 2 0 0 0)
PREDICTED: neutrophil cytosolic factor 1 isoform 4 [Pan troglodyte	0.00668521	16.0795	44654.9	114614035	3 (0 2 1 0 0)
cGMP-dependant protein kinase [Homo sapiens]	0.000317329	16.0741	84111.9	3123587	3 (0 3 0 0 0)
KIF2C_HUMAN Kinesin-like protein KIF2C (Mitotic centromere-associated kinesin	0.00862741	16.0656	81261.2	20141607	2 (1 0 1 0 0)
alpha1(X)collagen [Homo sapiens]	0.00420022	16.06	60286.7	560151	2 (1 0 1 0 0)
spastic paraplegia 21 [Homo sapiens]	0.0068729	16.0509	34937.6	7706174	2 (1 0 1 0 0)
growth arrest-specific 2 like 2 [Homo sapiens]	0.000999666	16.0402	96459.8	21281675	2 (1 0 1 0 0)
hCG1773636 [Homo sapiens]	0.00247706	14.1386	20494.8	119578198	5 (0 3 1 1 0)
gamma-aminobutyric acid (GABA) A receptor, delta [Homo sapiens]	0.000566785	14.1123	50676.1	34734071	2 (1 0 0 1 0)
glutamate dehydrogenase (NAD(P)+) [Homo sapiens]	0.0074262	14.0857	61394.6	31815	3 (0 1 1 0 1)
protein kinase C, gamma [Homo sapiens]	0.000393389	14.0774	78397.3	13384594	2 (1 0 0 1 0)
clathrin heavy chain 1 [Homo sapiens]	0.000423144	14.0767	191492	4758012	3 (1 0 0 0 2)
H4 histone family, member A [Homo sapiens]	0.000933877	14.0699	11360.4	4504301	3 (2 0 0 1 0)
unnamed protein product [Homo sapiens]	0.00251902	14.0669	25822.8	7022918	2 (0 1 1 0 0)
outer capsid protein VP4 [Human rotavirus strain S12/85]	0.000452475	14.0646	87248.1	3341745	2 (0 1 1 0 0)
hypothetical protein FLJ40243, isoform CRA_a [Homo sapiens]	0.00493956	14.0635	181374	119576413	2 (1 0 0 1 0)
solute carrier family 12 (potassium/chloride transporters), member 4 [H	0.00398132	14.0621	120572	4827006	2 (0 1 1 0 0)
AF457089_8 envelope glycoprotein [Human immunodeficiency virus 1]	0.00823678	14.0602	97683.9	22596571	2 (1 0 0 1 0)
TRI25_HUMAN Tripartite motif-containing protein 25 (Zinc finger protein 147)	0.00785627	14.0583	70943.9	12585547	3 (0 1 2 0 0)
G patch domain containing 2 [Homo sapiens]	0.00617266	14.0551	58907	8922313	2 (1 0 0 1 0)
PREDICTED: similar to Zinc finger, ZZ-type containing 3 [Danio rerio]	0.00934387	14.033	96824	125805364	2 (0 1 1 0 0)
novel protein similar to human chromodomain helicase DNA binding protei	0.000823338	12.1085	194514	94733808	2 (1 0 0 0 1)
ODP2_HUMAN Dihydrolipoyllysine-residue acetyltransferase component of pyruvate	4.20285e-05	12.0893	65739.4	3915777	2 (1 0 0 0 1)
KIAA1125 protein [Homo sapiens]	0.00688737	12.0772	133697	6329749	2 (0 1 0 1 0)
PREDICTED: similar to tumor endothelial marker 8 isoform 3 precursor	0.00345048	12.0671	62102.1	113421468	2 (0 1 0 1 0)
PREDICTED: similar to ubiquitin specific protease 8 [Homo sapiens]	0.00197562	12.0616	26468.3	113418040	2 (1 0 0 0 1)
H3 histone, family 3A [Homo sapiens]	0.000112879	12.0521	15318.5	4504279	2 (0 1 0 1 0)
vpu protein [Human immunodeficiency virus 1]	0.00426962	12.0465	9517.06	82571275	2 (0 1 0 1 0)
PREDICTED: similar to EF-hand calcium binding domain 1 [Homo sapiens]	0.00973865	12.0396	8459.4	89025334	2 (0 1 0 1 0)
histone H2A [Homo sapiens]	1.18956e-09	10.2787	13986.8	28195394	6 (6 0 0 0 0)
H2A histone family, member O [Homo sapiens]	5.65996e-07	10.2223	14086.9	4504251	5 (5 0 0 0 0)
tubulin, alpha 1a [Mus musculus]	1.26954e-11	10.2073	49927.7	6678465	2 (2 0 0 0 0)
vacuolar proton ATPase [Homo sapiens]	3.24156e-05	10.1979	26213.8	313014	1 (1 0 0 0 0)
unnamed protein product [Homo sapiens]	4.40631e-10	10.1746	39566.4	10435335	2 (2 0 0 0 0)
KIAA0338 [Homo sapiens]	3.2507e-08	10.1663	103516	2224617	1 (1 0 0 0 0)
protein kinase C, beta isoform 2 [Homo sapiens]	7.17376e-08	10.1531	76962.2	20127450	1 (1 0 0 0 0)
cofilin 1 (non-muscle) [Homo sapiens]	6.32267e-07	10.1513	18490.7	5031635	1 (1 0 0 0 0)
solute carrier family 25 (mitochondrial carrier; adenine nucleotide tr	3.983e-06	10.1482	33043.2	55749577	2 (2 0 0 0 0)
NKX61_HUMAN Homeobox protein Nkx-6.1	0.00161364	10.1452	37825.1	6016211	1 (1 0 0 0 0)
CD9 antigen [Homo sapiens]	8.59313e-12	10.1451	25399	4502693	1 (1 0 0 0 0)
H2A histone family, member A [Homo sapiens]	4.656e-06	10.1367	14127	10645195	4 (4 0 0 0 0)
KIAA0659 protein [Homo sapiens]	0.00812794	10.1361	115502	20521123	2 (0 1 0 0 1)
glyceraldehyde-3-phosphate dehydrogenase [Homo sapiens]	1.42255e-07	10.1344	36030.4	7669492	1 (1 0 0 0 0)
envelope protein [Human immunodeficiency virus 1]	0.00378566	10.132	96899.4	11124717	2 (1 0 0 0 1)
tubulin, alpha-like 3 [Homo sapiens]	0.00108823	10.1297	49875.8	119606853	5 (3 2 0 0 0)
bromodomain adjacent to zinc finger domain 2A [Homo sapiens]	0.000451298	10.1243	208508	6683498	2 (2 0 0 0 0)
hypothetical protein LOC345651 [Homo sapiens]	0.00016231	10.1238	41976	63055057	4 (0 2 1 0 1)
collapsin response mediator protein 1 isoform 2 [Homo sapiens]	3.8806e-06	10.1193	62144.8	4503051	2 (2 0 0 0 0)
de-ubiquitinase [Homo sapiens]	0.000252833	10.1164	95683.4	1122278	1 (1 0 0 0 0)
ubiquitin and ribosomal protein L40 precursor [Homo sapiens]	0.000613085	10.1163	14719	4507761	1 (1 0 0 0 0)
heat shock protein 90kDa alpha (cytosolic), class A member 1 isoform 2	0.000118508	10.1162	84620.7	40254816	1 (1 0 0 0 0)
DERP12 (dermal papilla derived protein 12) [Homo sapiens]	0.00306959	10.1135	38169	19909527	1 (1 0 0 0 0)
guanine nucleotide binding protein, alpha activating polypeptide O [Ho	0.00205044	10.1131	40024.9	10567816	1 (1 0 0 0 0)
N-ethylmaleimide-sensitive factor [Homo sapiens] [MA	2.20631e-05	10.1129	82542.2	21040484	1 (1 0 0 0 0)
EHD3_HUMAN EH domain-containing protein 3	8.45258e-07	10.1104	61857.2	18203332	1 (1 0 0 0 0)
envelope glycoprotein [Human immunodeficiency virus type 1]	0.00188525	10.1089	96777.7	3947951	1 (1 0 0 0 0)
ODO2_HUMAN Dihydrolipoyllysine-residue succinyltransferase component of 2-oxog	0.00273248	10.1085	48609.5	1709442	2 (1 1 0 0 0)
envelope protein [Human immunodeficiency virus 2] [M	0.00097613	10.1065	13226.8	3413223	1 (1 0 0 0 0)
Thy-1 cell surface antigen [Homo sapiens]	0.00207683	10.1035	17923.3	19923362	2 (2 0 0 0 0)
beta actin [Homo sapiens]	7.99052e-07	10.0994	41709.7	4501885	1 (1 0 0 0 0)
outer capsid protein [Human rotavirus G9]	0.00236352	10.097	33330.5	37781254	1 (1 0 0 0 0)
PREDICTED: similar to cytoplasmic beta-actin [Homo sapiens]	0.00271426	10.0946	17124.6	88942898	2 (0 1 0 0 1)
unactive progesterone receptor, 23 kD [Homo sapiens]	0.00162704	10.092	18685.4	23308579	2 (1 0 0 0 1)
WNT9B_HUMAN Protein Wnt-9b precursor (Wnt-15) (Wnt-14b)	0.00290017	10.0896	38945.3	20532421	4 (2 0 1 1 0)
lipin 1 [Homo sapiens]	0.000403938	10.0893	98602.5	22027648	1 (1 0 0 0 0)
hCG2029642 [Homo sapiens]	0.00086183	10.0872	8592.29	119567954	1 (1 0 0 0 0)
DEAH (Asp-Glu-Ala-His) box polypeptide 40, isoform CRA_e [Homo sapiens]	0.00787318	10.0866	50220	119614812	2 (2 0 0 0 0)
heterogeneous nuclear ribonucleoprotein A2/B1 isoform A2 [Homo sapiens]	9.02668e-06	10.0844	35983.8	4504447	1 (1 0 0 0 0)
protein kinase C, theta [Homo sapiens]	0.00821965	10.0841	81810.8	5453976	1 (1 0 0 0 0)
envelope glycoprotein [Human immunodeficiency virus 1]	0.00729214	10.0836	19829	125395441	1 (1 0 0 0 0)
heat shock 70kDa protein 8 isoform 2 [Homo sapiens]	0.000514294	10.0821	53484.5	24234686	1 (1 0 0 0 0)
phosphatidylinositol 4-kinase type 2 beta [Homo sapiens]	0.00099775	10.0819	54719.8	8922869	1 (1 0 0 0 0)
pol protein [Human endogenous retrovirus K]	0.000456865	10.0812	83512.2	1780973	1 (1 0 0 0 0)
glial fibrillary acidic protein [Homo sapiens]	0.00951201	10.0807	49849.7	4503979	1 (1 0 0 0 0)
ubiquinol-cytochrome c reductase binding protein [Homo sapiens]	0.000281238	10.0768	13522	5454152	1 (1 0 0 0 0)
U14 [Human herpesvirus 7]	0.00989227	10.0767	73859.1	51874237	1 (1 0 0 0 0)
immunoglobulin alpha heavy chain variable region [Homo sapiens]	0.000449771	10.0765	14011.9	62871218	2 (2 0 0 0 0)
A Chain A, Three Dimensional Structure Analysis Of The R195a Variant Of Human	0.0029702	10.0764	55752.1	20664068	3 (2 0 1 0 0)
ATP synthase, H+ transporting, mitochondrial F1 complex, gamma subu	0.00878132	10.0762	32975.3	50345988	1 (1 0 0 0 0)
immunoglobulin heavy chain variable region [Homo sapiens]	0.00870988	10.0761	13034.4	4837919	1 (1 0 0 0 0)
VP1 structural protein [Human enterovirus 71]	0.00319683	10.0761	14898.2	88174170	1 (1 0 0 0 0)
hCG1644525, isoform CRA_b [Homo sapiens]	0.00725142	10.076	23015.5	119571343	1 (1 0 0 0 0)
anti-tetanus toxoid immunoglobulin light chain variable region [Homo sap	0.00767665	10.0744	11861.9	58222926	1 (1 0 0 0 0)
neuralized-like protein 2 [Homo sapiens]	0.0064132	10.0739	31669.6	18152787	1 (1 0 0 0 0)
PREDICTED: hypothetical protein [Homo sapiens]	0.00464954	10.0735	19731.2	113416477	1 (1 0 0 0 0)
hCG2010747 [Homo sapiens]	0.00920635	10.0735	11936.9	119579985	2 (2 0 0 0 0)
unnamed protein product [Homo sapiens]	0.00498877	10.073	34077	18676903	2 (1 0 1 0 0)
AF286235_8 envelope glycoprotein [Human immunodeficiency virus type 1] [M	0.00377406	10.0728	95667.1	13569335	1 (1 0 0 0 0)
ADP-ribosylation factor 4 [Homo sapiens]	0.00620682	10.0724	20497.7	4502205	1 (1 0 0 0 0)
chemokine (C-C motif) receptor 9 isoform B [Homo sapiens]	0.00380743	10.0721	40685.9	14043044	1 (1 0 0 0 0)
S31503 H+/K+-exchanging ATPase (EC 3.6.3.10) ATP1AL1 - human (fragment)	0.00916291	10.07	10485.2	346261	1 (1 0 0 0 0)
AF219298_1 gag protein [Human immunodeficiency virus 1]	0.00485332	10.0692	7333.76	6857077	1 (1 0 0 0 0)
chondroitin sulfate glucuronyltransferase [Homo sapiens]	0.00015085	10.0689	85094	51105925	1 (1 0 0 0 0)
envelope glycoprotein [Human immunodeficiency virus 1]	0.00262795	10.0684	20690.3	30059042	1 (1 0 0 0 0)
nef protein [Human immunodeficiency virus type 1] [M	0.00100054	10.0682	23415.5	12004718	1 (1 0 0 0 0)
prosaposin isoform a preproprotein [Homo sapiens]	4.05591e-06	10.068	58073.9	11386147	1 (1 0 0 0 0)
calcium/calmodulin-dependent protein kinase II delta isoform 1 [Homo s	0.000409069	10.0679	54093.6	26667183	2 (0 0 1 1 0)
alpha-1 type IV collagen	0.00253784	10.0673	160510	180803	1 (1 0 0 0 0)
SMRD1_HUMAN SWI/SNF-related matrix-associated actin-dependent regulator of ch	0.00599845	10.0672	54910.3	27805718	2 (0 0 1 1 0)
anti-human TNF D2 immunoglobulin heavy chain variable region [Mus muscul	0.00440318	10.0669	12436	45477420	1 (1 0 0 0 0)
hypothetical protein [Homo sapiens]	0.00402911	10.0667	18863.5	57997193	1 (1 0 0 0 0)
KR2_EBV Probable serine/threonine-protein kinase	0.00737562	10.0661	51258.2	125627	1 (1 0 0 0 0)
DUS1L protein [Homo sapiens]	0.00424161	10.0643	45269.1	45946028	2 (0 1 0 0 1)
unnamed protein product [Homo sapiens]	0.00595139	10.0643	29062	4379034	1 (1 0 0 0 0)
Vif [Human immunodeficiency virus type 1]	0.000102104	10.0641	22372.6	4324899	5 (3 2 0 0 0)
envelope glycoprotein [Human immunodeficiency virus 1]	0.00323563	10.064	53391.6	61106238	2 (1 0 0 0 1)
hCG1800341 [Homo sapiens]	0.00356563	10.0639	46847.9	119569595	1 (1 0 0 0 0)
DHPR_HUMAN Dihydropteridine reductase (HDHPR) (Quinoid dihydropteridine redu	0.000129584	10.0639	25773	118572639	1 (1 0 0 0 0)
erythrocyte membrane protein band 4.1-like 2 [Homo sapiens]	0.00343374	10.0637	112519	4503579	1 (1 0 0 0 0)
envelope glycoprotein [Human immunodeficiency virus type 1]	0.000644668	10.0635	10689.6	5732873	2 (1 1 0 0 0)
solute carrier family 35, member F4 [Homo sapiens]	0.00856104	10.0621	57772.2	122937311	1 (1 0 0 0 0)
S39407 homeotic protein otx2 - human	0.00129179	10.0618	25231.5	7446283	1 (1 0 0 0 0)
hCG2041505 [Homo sapiens]	0.00459951	10.0617	34488.9	119621807	1 (1 0 0 0 0)
matrix metalloproteinase 7 preproprotein [Homo sapiens]	0.00781464	10.0616	29657.9	4505219	1 (1 0 0 0 0)
envelope glycoprotein [Human immunodeficiency virus 1]	0.00972587	10.0613	23296.5	24061927	1 (1 0 0 0 0)
pol protein [Human immunodeficiency virus type 1] [M	0.00346249	10.0608	37371.9	9945565	1 (1 0 0 0 0)
novel protein similar to human non-muscle myosin, heavy polypeptide 10	0.00578941	10.0605	123562	33468583	1 (1 0 0 0 0)
PREDICTED: similar to RAS p21 protein activator 4 [Homo sapiens] [	0.00657066	10.0604	11713	113419026	1 (1 0 0 0 0)
immunoglobulin heavy chain variable region [Homo sapiens]	0.00925373	10.0596	13061.5	17385008	1 (1 0 0 0 0)
V-1 reverse transcriptase [Human immunodeficiency virus 1]	0.000491576	10.0583	29476	7529340	2 (1 0 1 0 0)
guanine nucleotide-binding protein, beta-2 subunit [Mus musculus]	0.000641265	10.0582	37307.1	13937391	1 (1 0 0 0 0)
AF090908_1 PRO0246 [Homo sapiens]	0.00295689	10.0575	8762.75	6690192	3 (1 1 0 0 1)
envelope glycoprotein [Human immunodeficiency virus 1]	0.00865769	10.0568	97625.4	117581743	1 (1 0 0 0 0)
unnamed protein product [Homo sapiens]	0.00762057	10.0568	14984.2	10439579	1 (1 0 0 0 0)
gag protein [Human immunodeficiency virus 1]	0.00461351	10.0559	54958.1	74099685	1 (1 0 0 0 0)
immunoglobulin heavy chain variable region [Homo sapiens]	0.00896633	10.0555	13597.7	70798273	1 (1 0 0 0 0)
olfactomedin 2 [Homo sapiens]	0.00105749	10.0553	51353.4	17157993	1 (1 0 0 0 0)
protein kinase Myt1 isoform 1 [Homo sapiens]	0.000832923	10.055	54486.9	33383241	1 (1 0 0 0 0)
hypothetical protein [Homo sapiens]	0.0061945	10.0547	23094.1	5912201	1 (1 0 0 0 0)
glomulin [Homo sapiens]	0.00319156	10.0539	68164.7	16933537	1 (1 0 0 0 0)
RBM26 protein [Homo sapiens]	0.00973865	10.0534	62541.7	84627474	1 (1 0 0 0 0)
unnamed protein product [Homo sapiens]	0.00807588	10.0531	118925	16549858	1 (1 0 0 0 0)
regenerating islet-derived family, member 4 [Homo sapiens]	0.00935651	10.0528	18217.8	14042980	1 (1 0 0 0 0)
nbla10363 [Homo sapiens]	0.00384954	10.0526	105622	19911062	1 (1 0 0 0 0)
nef protein [Human immunodeficiency virus 1]	0.00870155	10.0512	23760.9	20126806	1 (1 0 0 0 0)
unnamed protein product [Homo sapiens]	0.00744014	10.0501	19367.8	1333690	1 (1 0 0 0 0)
X unnamed protein product [Homo sapiens]	0.00956551	10.0495	36898.3	134105134	3 (1 1 0 1 0)
AF471423_1 Ig heavy chain variable region, VH3 family [Homo sapiens] [MAS	0.00953745	10.0492	14091.8	33319390	1 (1 0 0 0 0)
checkpoint with forkhead and ring finger domains, isoform CRA_g [Homo s	0.00683963	10.0491	40173.9	119575202	1 (1 0 0 0 0)
I38026 MLN 62 protein - human	0.0026555	10.049	53408.4	2135748	1 (1 0 0 0 0)
arylsulfatase D isoform a precursor [Homo sapiens]	0.00722374	10.0476	64818.1	71852584	1 (1 0 0 0 0)
HECT type E3 ubiquitin ligase [Homo sapiens]	0.000297659	10.0467	177056	51094760	2 (0 1 0 0 1)
nuclear receptor interacting protein 2 [Homo sapiens]	0.00455109	10.0467	31311.2	13899327	1 (1 0 0 0 0)
AF268340_1 envelope glycoprotein gp120 [Human immunodeficiency virus type	0.00914231	10.0439	12607.3	8133158	1 (1 0 0 0 0)
envelope glycoprotein gp120 [Human immunodeficiency virus 1]	0.000899947	10.0431	21466.8	11125097	1 (1 0 0 0 0)
nef protein [Human immunodeficiency virus 1]	0.00841043	10.0381	23741.7	31087640	1 (1 0 0 0 0)
vif protein [Human immunodeficiency virus 1]	0.00729571	10.0278	22726.7	114149080	1 (1 0 0 0 0)
PREDICTED: similar to ankyrin repeat domain 30A [Homo sapiens]	0.00418764	8.15479	26016.9	113425034	1 (0 1 0 0 0)
similar to GenBank Accession Number AF045184 nuclear receptor coactivato	0.0062662	8.15222	25758.4	29841015	6 (1 2 1 2 0)
gag protein [Human immunodeficiency virus 1]	0.00182553	8.14696	55119.2	90812182	3 (1 2 0 0 0)
AACS protein [Homo sapiens]	0.00328619	8.14691	45607.8	71297231	11 (1 9 0 0 1)
microsomal glutathione S-transferase 3 [Homo sapiens]	1.54756e-05	8.1441	16505.6	4758714	3 (2 1 0 0 0)
hypothetical protein [Human calicivirus Hu/NLV/Queen's Arms/Leeds/92/UK	0.00941849	8.13733	22089.1	14330431	2 (0 1 0 0 1)
immunoglobulin mu heavy chain [Homo sapiens]	0.00502486	8.11859	13314.6	54779543	1 (0 1 0 0 0)
AF166179_1 polyprotein [Human coxsackievirus A9] [MAS	0.00263823	8.11702	14925.1	6752481	1 (0 1 0 0 0)
polyubiquitin [Homo sapiens]	0.000613085	8.11628	68450.1	2627129	1 (0 1 0 0 0)
PREDICTED: hypothetical protein [Homo sapiens]	0.00321563	8.11556	7745.15	113417656	8 (1 2 2 2 1)
dedicator of cytokinesis 4, isoform CRA_d [Homo sapiens]	0.00928978	8.10716	166436	119603860	8 (0 6 1 0 1)
postreplication repair protein hRAD18p [Homo sapiens]	0.0077251	8.1004	56159.3	14550405	9 (0 8 1 0 0)
lipin 3 [Homo sapiens]	0.000281655	8.10003	93556.5	74271888	4 (0 2 2 0 0)
structural protein VP1 [Rotavirus C]	0.0055551	8.09662	125722	81097460	2 (0 1 0 1 0)
pol polyprotein [Human immunodeficiency virus type 1]	0.00102669	8.0941	29289.2	5923939	3 (0 1 1 1 0)
envelope glycoprotein gp120 V3 region [Human immunodeficiency virus type	0.00488834	8.08326	7891.06	2342832	1 (0 1 0 0 0)
homer 2 isoform 1 [Homo sapiens]	0.00799931	8.08309	39443.1	46249349	1 (0 1 0 0 0)
glycoprotein H [Human herpesvirus 7]	0.00340985	8.08284	56005.2	28399470	1 (0 1 0 0 0)
hCG2042107 [Homo sapiens]	0.00307714	8.08239	17809.1	119623322	1 (0 1 0 0 0)
pol protein [Human immunodeficiency virus 1]	0.00368892	8.08086	56979.6	42717134	3 (0 1 1 1 0)
zinc finger protein 294, isoform CRA_b [Homo sapiens]	0.0072346	8.07898	156015	119630341	1 (0 1 0 0 0)
origin recognition complex, subunit 2 [Homo sapiens]	0.00863767	8.07792	65931	5453830	2 (0 0 1 0 1)
hypothetical protein [Homo sapiens]	0.00440805	8.07653	229116	51476593	3 (0 2 1 0 0)
hypothetical protein HHV6gp090 [Human herpesvirus 6A]	0.00716081	8.07479	93227.4	9628379	1 (0 1 0 0 0)
G protein-coupled receptor 113, isoform CRA_c [Homo sapiens]	0.00534896	8.07439	118677	119621101	1 (0 1 0 0 0)
RXFP1_HUMAN Relaxin receptor 1 (Relaxin family peptide receptor 1) (Leucine-r	0.00900044	8.07225	86935.6	21362643	1 (0 1 0 0 0)
complement factor H-related 5 [Homo sapiens]	0.00460114	8.07186	64377.1	13540563	2 (0 0 0 2 0)
vpu protein [Human immunodeficiency virus 1]	0.00270669	8.07126	9045.87	28201157	1 (0 1 0 0 0)
KIAA1983 protein [Homo sapiens]	0.00747532	8.07046	45183	18916890	2 (0 0 1 0 1)
circulating B cell antibody heavy chain variable region [Homo sapiens]	0.00747406	8.07023	13393.6	106897984	1 (0 1 0 0 0)
MGC12760 protein [Homo sapiens]	0.00686482	8.06968	12359.3	13623425	1 (0 1 0 0 0)
T46481 hypothetical protein DKFZp434A025.1 - human (fragment)	0.000786054	8.0689	117578	11359883	1 (0 1 0 0 0)
eukaryotic translation elongation factor 1 gamma, isoform CRA_e [Homo s	0.00844341	8.06764	23330	119594433	2 (0 1 0 0 1)
KIAA1632 protein [Homo sapiens]	0.00468846	8.06649	165103	10047341	1 (0 1 0 0 0)
envelope glycoprotein [Human immunodeficiency virus type 1]	0.00359536	8.0658	10700.2	3462379	2 (0 0 1 0 1)
hCG2040555 [Homo sapiens]	0.0077689	8.06534	35375.1	119586895	1 (0 1 0 0 0)
pleckstrin homology domain containing, family B (evectins) member 1 [H	0.000218023	8.06423	27168.5	10864013	1 (0 1 0 0 0)
nef protein [Human immunodeficiency virus type 1] [	0.00835896	8.06418	8080.82	13898113	1 (0 1 0 0 0)
AF130117_73 PRO2459 [Homo sapiens]	0.00128173	8.06404	10449.3	11493532	1 (0 1 0 0 0)
pol protein [Human immunodeficiency virus 1]	0.00177356	8.06288	113107	93210736	1 (0 1 0 0 0)
envelope glycoprotein [Human immunodeficiency virus type 1]	0.00808059	8.06231	24370.3	14573011	1 (0 1 0 0 0)
T08851 Down syndrome cell adhesion protein 1 - human (fragment)	0.00860908	8.06132	209653	7512400	2 (0 0 1 0 1)
envelope glycoprotein [Human immunodeficiency virus 1]	0.00578841	8.06122	15903.1	8920126	2 (0 1 1 0 0)
PH1275 Ig heavy chain V region (clone PBL6) - human (fragment)	0.00102436	8.06117	11083.4	346093	2 (0 0 1 0 1)
hypothetical protein LOC144577 [Homo sapiens]	0.00043614	8.0593	50381.1	47458825	1 (0 1 0 0 0)
SIA7C_HUMAN Alpha-N-acetylgalactosaminide alpha-2,6-sialyltransferase 3 (GalN	0.00618071	8.05847	35371.8	48428651	1 (0 1 0 0 0)
hydroxymethylbilane synthase isoform 1 [Homo sapiens]	0.000765251	8.05798	39305.7	20149500	1 (0 1 0 0 0)
envelope glycoprotein [Human immunodeficiency virus 1]	0.00359918	8.05739	12406.5	49616644	2 (1 1 0 0 0)
envelope glycoprotein [Human immunodeficiency virus 1]	0.000490564	8.05642	20565.8	119698719	1 (0 1 0 0 0)
N-myc downstream-regulated gene 2 isoform a [Homo sapiens]	0.00536465	8.05516	40772.2	42544211	1 (0 1 0 0 0)
Unknown (protein for MGC:102982) [Homo sapiens] [MA	0.00362895	8.04989	24559.1	62204157	1 (0 1 0 0 0)
unnamed protein product [Homo sapiens]	0.0014938	8.04933	62059.5	14042300	2 (0 0 1 0 1)
KIAA0017 [Homo sapiens]	0.00300972	8.04864	44577.6	285999	1 (0 1 0 0 0)
VPP1_HUMAN Vacuolar proton translocating ATPase 116 kDa subunit a isoform 1 (	0.00476699	8.04845	96350.3	59803038	1 (0 1 0 0 0)
unnamed protein product [Homo sapiens]	0.000674897	8.04831	29728	7023262	2 (0 0 1 0 1)
karyopherin beta 1 [Homo sapiens]	0.00224608	8.04818	97108.2	19923142	1 (0 1 0 0 0)
RNA binding protein DEF-3 [Homo sapiens]	0.00635308	8.04796	128537	3212101	1 (0 1 0 0 0)
histone stem-loop binding protein [Homo sapiens]	0.000963438	8.04737	31266.2	5729862	1 (0 1 0 0 0)
zinc finger protein 630 [Homo sapiens]	0.00179673	8.04435	61578.1	83627719	1 (0 1 0 0 0)
E3B1 29.1k [Human adenovirus type 8]	0.00902813	8.04397	29120.2	32451401	1 (0 1 0 0 0)
hCG2042123 [Homo sapiens]	0.0046291	8.04015	5929.2	119616326	1 (0 1 0 0 0)
envelope glycoprotein [Human immunodeficiency virus 1]	0.00137966	8.03886	46387.4	51832557	1 (0 1 0 0 0)
B Chain B, The Structure Of The Immunophilin-Immunosuppressant Fkbp12-Rapamycin	0.00998319	8.03556	11464.6	2392329	1 (0 1 0 0 0)
MARCH9 protein [Homo sapiens]	0.00953639	6.15508	52955.4	29791835	3 (1 0 1 0 1)
glutamate transporter [Homo sapiens]	0.000999159	6.13282	61664.6	488752	7 (0 4 2 1 0)
unnamed protein product [Homo sapiens]	0.00951847	6.06961	42886.9	7022300	2 (0 0 0 1 1)
AF217743_1 protocadherin-psi2 [Homo sapiens]	0.00561983	4.13006	80423.3	14009451	2 (0 1 0 1 0)
nef protein [Human immunodeficiency virus 1]	0.00204861	4.09195	22027.9	71801506	5 (0 2 1 1 1)
KIAA1459 protein [Homo sapiens]	0.00259673	4.05091	94089.6	7959179	2 (0 0 0 0 2)
hypothetical protein DDBDRAFT_0206578 [Dictyostelium discoideum AX4]	0.00852009	4.04632	346629	66823609	2 (0 0 0 0 2)
gag protein [Human immunodeficiency virus 1]	0.00996646	2.11064	56077.8	56608713	4 (1 0 1 0 2)
nef protein [Human immunodeficiency virus 1]	0.00204861	2.09195	14281.2	90192289	5 (1 0 1 2 1)
KIAA1429 protein [Homo sapiens]
hCG2005342 [Homo sapiens]
minor histocompatibility antigen HA-1 [Homo sapiens]
alpha (1,2) fucosyltransferase [Homo sapiens]
hypothetical protein [Homo sapiens]
envelope glycoprotein [Human immunodeficiency virus 1]
B42856 ubiquitin carrier protein E2 - human
CUTL1_HUMAN Homeobox protein cut-like 1 (CCAAT displacement protein) (CDP) [M
protease [Human immunodeficiency virus 1]
unnamed protein product [Homo sapiens]
envelope glycoprotein [Human immunodeficiency virus 1]
NS1 [Human bocavirus]
U06698 neuronal kinesin heavy chain from Homo sa
immunoglobulin heavy chain variable region [Homo sapiens]
antigen NY-CO-3 [Homo sapiens]
envelope glycoprotein [Human immunodeficiency virus 1]
zinc finger protein 673 [Homo sapiens]
tyrosylprotein sulfotransferase 1 [Homo sapiens]
vitelliform macular dystrophy 2-like 3 isoform 1 [Homo sapiens]
TBP-associated factor 13 [Homo sapiens]
DNA-dependent protein kinase catalytic subunit [Homo sapiens]
tetratricopeptide repeat domain 18 [Homo sapiens]
KIAA0820 protein [Homo sapiens]
TAT_HV1B9 Protein Tat (Transactivating regulatory protein)
hCG1987492 [Homo sapiens]
hypothetical protein LOC388284 [Homo sapiens]
modulator of apoptosis 1 [Homo sapiens]
X-ray repair cross complementing protein 3 [Homo sapiens]
oxidoreductase NAD-binding domain containing 1 [Homo sapiens]
anti-tetanus toxoid immunoglobulin heavy chain variable region [Homo sap
syntaxin 1B2 [Rattus norvegicus]
VRK3 protein [Homo sapiens]
TNKS1_HUMAN Tankyrase-1 (TANK1) (Tankyrase I) (TNKS-1) (TRF1-interacting anky
K1045_HUMAN Protein KIAA1045
hypothetical protein [Homo sapiens]
formiminotransferase cyclodeaminase [Homo sapiens]
polyprotein [Human rhinovirus 47]
hypothetical protein LOC79736 [Homo sapiens]
hematopoietic signal peptide-containing isoform 2 [Homo sapiens]
envelope glycoprotein [Human immunodeficiency virus 1]
leukemia-associated protein 2 [Homo sapiens]
KIAA0431 [Homo sapiens]
coiled-coil domain containing 42 [Homo sapiens]
Tubulin, beta [Homo sapiens]
actin-like protein [Homo sapiens]
unnamed protein product [Homo sapiens]
Na,K-ATPase catalytic subunit alpha-A protein [Homo sapiens]
F-box and WD repeat domain containing 11 isoform A [Homo sapiens]
S34775 nicotinic acetylcholine receptor epsilon chain precursor - human
S31503 H+/K+-exchanging ATPase (EC 3.6.3.10) ATP1AL1 - human (fragment)
ORF putative E6 [Human papillomavirus type 59]
pol polyprotein [Human immunodeficiency virus type 1]
Unknown [Homo sapiens]
coiled-coil domain containing 25 [Homo sapiens]
solute carrier family 10 (sodium/bile acid cotransporter family), memb
DNA packaging tegument protein UL25 [Human herpesvirus 3]
nuclear protein in testis, isoform CRA_b [Homo sapiens]
NEDD4_HUMAN E3 ubiquitin-protein ligase NEDD4
unnamed protein product [Homo sapiens]
AF258985_1 envelope glycoprotein [Human immunodeficiency virus type 1] [M
immunoglobulin E heavy chain variable region [Homo sapiens]
AF447582_1 HLCDGP1 [Homo sapiens]
tartrate resistant acid phosphatase 5 precursor [Homo sapiens]
envelope glycoprotein [Human immunodeficiency virus 1]
immunoglobulin heavy chain variable region [Homo sapiens]
immunoglobulin heavy chain variable region [Homo sapiens]
anaplastic lymphoma kinase (Ki-1), isoform CRA_c [Homo sapiens]
envelope glycoprotein [Human immunodeficiency virus type 1]
unnamed protein product [Homo sapiens]
envelope glycoprotein [Human immunodeficiency virus 1]
hCG201417 [Homo sapiens]
phosphotyrosyl phosphatase activator [Homo sapiens]
immunoglobulin heavy chain variable region [Homo sapiens]
ATP synthase, H+ transporting, mitochondrial F0 complex, subunit d isof
pol protein [Human immunodeficiency virus 1]
envelope glycoprotein [Human immunodeficiency virus type 1]
HESB like domain containing 1 [Homo sapiens]
protease [Human immunodeficiency virus 1]
functionless protein [Homo sapiens]
zinc finger, DHHC-type containing 11 [Homo sapiens]
glioma pathogenesis-related protein precursor [Homo sapiens]
AF067164_1 zinc finger protein 2 [Homo sapiens]
TRI25_HUMAN Tripartite motif-containing protein 25 (Zinc finger protein 147)
antibody, light chain variable regin to HIV1 gp41 [Homo sapiens]
FLJ00345 protein [Homo sapiens]
gag protein [Human immunodeficiency virus 1]
keratin [Homo sapiens]
envelope glycoprotein [Human immunodeficiency virus type 1]
zinc finger protein 519 [Homo sapiens]
fatty acid binding protein 5 (psoriasis-associated) [Homo sapiens]
hypothetical protein (similar to Human CGI-32 protein [Streptococcus p
nef protein [Human immunodeficiency virus type 1] [M
envelope glycoprotein [Human immunodeficiency virus 1]
hCG1790787, isoform CRA_b [Homo sapiens]
protease [Human immunodeficiency virus 1]
vpu [Human immunodeficiency virus 1]
leucine-rich repeat LGI family, member 4 [Homo sapiens]
rhophilin, Rho GTPase binding protein 1, isoform CRA_e [Homo sapiens] [
envelope glycoprotein [Human immunodeficiency virus type 1]
unnamed protein product [Homo sapiens]
sarco/endoplasmic reticulum Ca2+ -ATPase [Homo sapiens]
LEU2_HUMAN Leukemia-associated protein 2 (Deleted in lymphocytic leukemia 2)
progesterone receptor membrane component 1 [Homo sapiens]
immunoglobuliln heavy chain variable region [Homo sapiens]
C8ORFK32 protein [Homo sapiens]
unknown [Homo sapiens]
fusion protein [Human parainfluenza virus 3]
retinal outer segment membrane protein 1 [Homo sapiens]
immunoglobulin kappa light chain variable region [Homo sapiens]
hCG2038572 [Homo sapiens]
sialic acid binding Ig-like lectin 7 isoform 1 [Homo sapiens]
unknown [Homo sapiens]
putative TCPTP-interacting protein [Homo sapiens]
hypothetical protein [Homo sapiens]
nef protein [Human immunodeficiency virus 1]
gag protein [Human immunodeficiency virus 1]
GCN5 general control of amino-acid synthesis 5-like 2 (yeast), isoform
CXorf30 [Homo sapiens]
tat protein [Human immunodeficiency virus 1]
hypothetical protein [Homo sapiens]
envelope glycoprotein [Human immunodeficiency virus type 1]
unnamed protein product [Homo sapiens]
Homo sapiens zinc finger protein 202 [synthetic construct]
PDZ domain containing RING finger 3 [Homo sapiens]
AF289590_1 unknown [Homo sapiens]
C-type lectin domain family 3 member A [Homo sapiens]
envelope glycoprotein [Human immunodeficiency virus 1]
vif protein [Human immunodeficiency virus 1]
hypothetical protein LOC374977 [Homo sapiens]
protease [Human immunodeficiency virus 1]
hCG1645235, isoform CRA_b [Homo sapiens]
unnamed protein product [Homo sapiens]
KDEL1_HUMAN KDEL motif-containing protein 1 precursor
gp120 [Human immunodeficiency virus 1]
AF156064_1 pol protein [Human immunodeficiency virus type 1]
reverse transcriptase [Human immunodeficiency virus 1]
KIAA1152 protein [Homo sapiens]
envelope glycoprotein gp120 [Human immunodeficiency virus 1]
pol protein [Human immunodeficiency virus 1]
hypothetical protein [Homo sapiens]
nef protein [Human immunodeficiency virus 1]
reverse transcriptase [Human immunodeficiency virus 1]

## Sheet: CADASIL_3_UT
Reference	P -value	Score	MW	Accession	Peptide (Hits)
2',3'-cyclic-nucleotide 3'-phosphodiesterase (EC 3.1.4.37)	3.36058e-11	338.203	45070.4	180687	98 (81 10 3 3 1)
syntaxin binding protein 1 isoform a [Homo sapiens]	2.14818e-09	288.162	68692.3	4507297	45 (37 3 2 2 1)
I38369 beta-tubulin - human (fragment)	6.77484e-11	220.25	48848.5	2119276	130 (112 13 2 1 2)
neurofilament, light polypeptide 68kDa [Homo sapiens]	8.10993e-08	206.218	61479.3	105990539	32 (26 2 0 2 2)
neurofilament, medium polypeptide 150kDa [Homo sapiens]	7.6853e-11	202.214	102386	4885513	30 (22 5 1 1 1)
brain creatine kinase [Homo sapiens]	8.65955e-10	190.215	42617.4	21536286	92 (81 3 5 1 2)
ATP synthase, H+ transporting, mitochondrial F1 complex, alpha subunit	4.30978e-10	178.214	59713.7	4757810	26 (23 2 0 0 1)
tubulin alpha 6 [Homo sapiens]	3.48484e-10	164.196	49863.5	14389309	102 (86 5 3 5 3)
tubulin, beta 4 [Homo sapiens]	8.94524e-10	156.251	49553.9	21361322	103 (72 25 3 0 3)
heat shock 90kDa protein 1, beta [Homo sapiens]	4.5898e-09	148.198	83212.2	20149594	23 (18 3 2 0 0)
tyrosine 3/tryptophan 5 -monooxygenase activation protein, epsilon poly	1.66449e-06	138.137	29155.4	5803225	19 (16 0 2 0 1)
A Chain A, Crystal Structure Of A DictyosteliumTETRAHYMENA CHIMERA Actin	2.10337e-08	128.201	41719.9	7245526	44 (36 6 0 2 0)
internexin neuronal intermediate filament protein, alpha [Homo sapiens	7.10649e-05	126.14	55357.5	14249342	15 (11 4 0 0 0)
glial fibrillary acidic protein [Homo sapiens]	6.87253e-09	112.183	49849.7	4503979	13 (8 3 1 0 1)
N-ethylmaleimide-sensitive factor [Homo sapiens]	2.54818e-07	112.174	82602.2	11079228	18 (11 3 1 2 1)
brain abundant, membrane attached signal protein 1 [Homo sapiens]	2.24932e-06	104.185	22680	30795231	16 (15 0 0 1 0)
G02520 plectin - human	2.7808e-05	104.113	518172	7442004	17 (6 2 2 3 4)
tubulin, beta, 4 [Homo sapiens]	6.70131e-12	100.226	50400.3	50592996	39 (21 11 4 2 1)
KIAA0968 protein [Homo sapiens]	5.87999e-08	98.1946	58985.2	4589580	28 (22 4 1 1 0)
tyrosine 3-monooxygenase/tryptophan 5-monooxygenase activation protein,	0.0026837	96.1332	28064.8	4507949	17 (9 5 2 0 1)
microtubule-associated protein 1B isoform 1 [Homo sapiens]	9.1691e-09	92.1645	270452	5174525	14 (7 1 3 0 3)
myelin basic protein isoform 1 [Homo sapiens]	3.29123e-07	88.1859	21480	68509930	26 (24 2 0 0 0)
ATRB actin, skeletal muscle - rabbit	4.01504e-06	88.1752	41789.8	71611	28 (14 9 3 2 0)
crystallin, alpha B [Homo sapiens]	2.42013e-07	84.1791	20146.4	4503057	11 (10 0 0 1 0)
synapsin I isoform Ia [Homo sapiens]	0.000256896	84.1162	74065.8	19924099	10 (7 1 0 1 1)
KIAA0987 protein [Homo sapiens]	1.71504e-10	82.191	123629	4589618	11 (10 0 0 0 1)
unnamed protein product [Homo sapiens]	7.44701e-07	82.159	35738.8	32486	12 (8 3 1 0 0)
ubiquitin-activating enzyme E1 [Homo sapiens]	2.15669e-06	80.1835	117774	23510338	9 (6 1 2 0 0)
PREDICTED: glutaminase C isoform 4 [Pan troglodytes]	0.000385465	80.1507	73414	114582295	15 (7 2 1 2 3)
GNAO2_HUMAN Guanine nucleotide-binding protein G(o) subunit alpha 2	6.1421e-08	78.1684	40061.1	60416433	15 (12 2 0 0 1)
ANK2_HUMAN Ankyrin-2 (Brain ankyrin) (Ankyrin-B) (Ankyrin, nonerythroid)	6.38936e-07	78.1471	430079	1703310	10 (6 2 2 0 0)
proteolipid protein [Rattus norvegicus]	1.2571e-05	76.1545	30057.1	13591880	24 (20 1 2 0 1)
tubulin, alpha-like 3 [Homo sapiens]	2.98662e-05	76.1287	49876.8	13376181	30 (19 6 2 1 2)
KIAA0417 [Homo sapiens]	3.55442e-06	74.1431	78381.4	2887409	9 (7 1 1 0 0)
ubiquitin carboxyl-terminal esterase L1 (ubiquitin thiolesterase) [Hom	8.01354e-08	72.1713	24808.5	21361091	14 (12 1 0 1 0)
heat shock protein 90kDa alpha (cytosolic), class A member 1 isoform 2	1.43885e-12	70.2175	84620.7	40254816	12 (12 0 0 0 0)
tyrosine 3-monooxygenase/tryptophan 5-monooxygenase activation protein,	9.72722e-11	70.2088	28284.9	9507245	13 (12 0 1 0 0)
dihydropyrimidinase-like 2 [Homo sapiens]	6.69102e-06	70.1868	62254.7	4503377	12 (8 1 2 0 1)
glucose phosphate isomerase [Homo sapiens]	1.58577e-08	66.1618	63107.3	18201905	12 (10 0 0 1 1)
heavy neurofilament subunit [Homo sapiens]	1.04685e-06	64.1603	111713	1841430	7 (6 0 0 1 0)
H4 histone family, member A [Homo sapiens]	7.06765e-05	62.1617	11360.4	4504301	9 (4 2 2 0 1)
eukaryotic translation elongation factor 1 alpha 1 [Homo sapiens]	0.00362735	62.1402	50109.2	4503471	7 (6 0 0 0 1)
clathrin heavy chain 1 [Homo sapiens]	0.000104448	62.1122	191492	4758012	8 (4 2 0 1 1)
KIAA1708 [Homo sapiens]	0.00219512	62.091	185022	30725047	8 (3 3 1 0 1)
tubulin, alpha 1B [Mus musculus]	7.33746e-12	60.2596	50119.6	34740335	45 (44 0 1 0 0)
peptidylprolyl isomerase A [Mus musculus]	1.2886e-08	60.2142	17959.8	6679439	8 (8 0 0 0 0)
KIAA0325 protein [Homo sapiens]	1.86871e-06	60.187	533404	71891782	13 (7 0 4 1 1)
Na+/K+ -ATPase alpha 2 subunit proprotein [Homo sapiens]	4.2355e-06	60.1785	112194	4502271	9 (9 0 0 0 0)
unnamed protein product [Homo sapiens]	0.000131167	60.15	57919.5	28940	8 (6 1 0 0 1)
R Chain R, Twinning In Crystals Of Human Skeletal Muscle D- Glyceraldehyde-3-Pho	7.21335e-06	60.132	35853.3	230867	8 (4 3 0 1 0)
VDAC2 [Homo sapiens]	3.84454e-07	56.1711	30393	48146045	9 (7 0 0 1 1)
contactin 1 isoform 1 precursor [Homo sapiens]	1.25688e-06	56.1416	113249	28373117	6 (5 0 1 0 0)
KIAA0820 protein [Homo sapiens]	1.92739e-05	54.1754	99887.1	20521666	9 (3 3 1 1 1)
A40671 dynamin, internal form 1, long C-terminal form - human [M	1.81551e-09	52.1673	97201	539580	6 (5 0 0 0 1)
STX1B_HUMAN Syntaxin-1B1 (Syntaxin 1B)	7.69374e-11	52.1538	33410.1	2501085	6 (5 0 0 0 1)
unknown [Homo sapiens]	5.05681e-08	52.1425	268547	62988842	7 (3 2 0 1 1)
ubiquinol-cytochrome c reductase core protein II [Homo sapiens]	2.29036e-07	52.1377	48412.9	50592988	6 (4 1 0 1 0)
N-ethylmaleimide sensitive fusion protein attachment protein beta [Mus	1.70726e-08	50.2229	33535.5	29789104	5 (5 0 0 0 0)
cofilin 1 (non-muscle) [Homo sapiens]	1.19964e-08	50.2105	18490.7	5031635	8 (8 0 0 0 0)
carbonyl reductase 1 [Homo sapiens]	3.64843e-06	50.2073	30355.9	4502599	5 (5 0 0 0 0)
phosphofructokinase, platelet [Homo sapiens]	1.6116e-11	50.1955	85541.6	11321601	6 (6 0 0 0 0)
tubulin, beta 2 [Homo sapiens]	1.37172e-08	50.1905	49875	4507729	30 (24 6 0 0 0)
tyrosine 3/tryptophan 5 -monooxygenase activation protein, zeta polypep	2.16334e-05	50.1687	27727.7	4507953	10 (9 0 0 1 0)
synaptosomal-associated protein 25 isoform SNAP25A [Homo sapiens]	2.832e-07	50.1649	23321.2	18765733	7 (7 0 0 0 0)
glyceraldehyde-3-phosphate dehydrogenase [Homo sapiens]	9.8848e-08	50.1615	36030.4	7669492	11 (8 1 1 0 1)
voltage-dependent anion channel 1 [Homo sapiens]	1.42013e-06	50.1561	30753.6	4507879	8 (5 0 1 0 2)
DCLK1_HUMAN Serine/threonine-protein kinase DCLK1 (Doublecortin-like and CAM k	0.00196957	48.0802	82173	6225242	7 (3 1 3 0 0)
calcium/calmodulin-dependent protein kinase IIB isoform 8 [Homo sapien	3.73101e-07	46.1975	50923	26051218	14 (12 0 2 0 0)
A Chain A, Crystal Structure Of Constant Regulatory Domain Of Human Pp2a, Pr65a	1.54079e-06	46.1415	65136.1	4558258	5 (4 0 1 0 0)
microtubule-associated protein 2 [Homo sapiens]	2.30291e-07	46.1165	199045	1850617	6 (5 0 1 0 0)
heat shock 70kDa protein 9B precursor [Homo sapiens]	0.00110389	42.148	73634.8	24234688	6 (2 1 1 2 0)
MLL2_HUMAN Myeloid/lymphoid or mixed-lineage leukemia protein 2 (ALL1-related	0.00105587	42.1024	563836	37999860	7 (1 3 0 1 2)
coatomer protein complex, subunit alpha isoform 2 [Homo sapiens]	0.00366637	42.0677	138258	148536853	6 (3 1 0 0 2)
Na+,K+ ATPase [Homo sapiens]	2.65247e-08	40.1656	111901	1359715	4 (4 0 0 0 0)
cysteine and glycine-rich protein 1 [Homo sapiens]	1.44737e-09	40.1647	20553.8	4758086	4 (4 0 0 0 0)
HSP71_HUMAN Heat shock 70 kDa protein 1 (HSP70.1) (HSP70-1/HSP70-2)	0.000204062	40.1117	70009.2	147744565	5 (3 0 1 1 0)
tubulin polymerization promoting protein [Homo sapiens]	0.000381962	40.1104	23679.2	5902018	4 (4 0 0 0 0)
ataxia telangiectasia mutated homolog [Mus musculus]	0.00469041	40.1038	349262	6680740	5 (2 1 2 0 0)
unnamed protein product [Homo sapiens]	4.87002e-07	38.1632	49811	10433717	24 (11 4 6 2 1)
guanine nucleotide-binding protein, beta-2 subunit [Mus musculus]	9.40568e-06	38.1514	37307.1	13937391	5 (4 1 0 0 0)
guanine nucleotide binding protein, alpha activating polypeptide O [Ho	8.21674e-05	38.1385	40024.9	10567816	6 (5 1 0 0 0)
H3 histone, family 3A [Homo sapiens]	0.00164086	38.0871	15318.5	4504279	6 (5 1 0 0 0)
RAN binding protein 2 [Homo sapiens]	0.00103816	38.0762	357944	6382079	7 (1 1 2 1 2)
S68466 translation elongation factor EF-Tu-like protein P43 precursor, mitochondria	3.38951e-10	36.1987	49502.2	7443384	4 (3 0 1 0 0)
A Chain A, Human Vimentin Coil 2b Fragment (Cys2)	5.53914e-07	36.1556	9901.82	20149836	5 (3 0 1 0 1)
triosephosphate isomerase 1 [Homo sapiens]	3.38413e-06	36.1173	26652.7	4507645	4 (3 0 1 0 0)
ALMS1 protein [Homo sapiens]	0.00579557	36.1052	460906	20067381	6 (1 2 0 2 1)
beta tubulin 1, class VI [Homo sapiens]	0.00131767	36.1009	50294.6	13562114	9 (2 2 2 1 2)
N Chain N, Mutant Monomer Of Recombinant Human Hexokinase Type I Complexed With	5.32336e-05	34.1564	102383	7245424	4 (3 0 0 1 0)
A Chain A, Crystal Structure Of Caenorhabditis Elegans Mg-Atp Actin Complexed	2.70093e-06	34.1523	41637.7	14278147	5 (2 3 0 0 0)
Na+/K+ -ATPase alpha 1 subunit isoform a proprotein [Homo sapiens]	0.000136913	34.111	112824	21361181	4 (3 0 0 1 0)
adducin 1 (alpha) isoform a [Homo sapiens]	0.000695369	34.0978	80904.8	29826319	5 (3 1 0 1 0)
SI:dZ87I4.1 (novel protein similar to human signal transducer and activ	0.00377406	34.0913	132636	22316176	4 (3 0 0 1 0)
RYR2_HUMAN Ryanodine receptor 2 (Cardiac muscle-type ryanodine receptor) (RyR	0.00835147	34.067	564136	17380312	5 (3 0 1 1 0)
KIAA1176 protein [Homo sapiens]	0.000143331	32.1061	121738	6330233	4 (2 0 2 0 0)
integrin alpha M precursor [Homo sapiens]	0.000200602	32.0961	127099	88501734	8 (3 2 1 2 0)
transient receptor potential cation channel, subfamily V, member 2 [Ho	0.00567331	32.0832	85926.2	20127551	4 (1 2 1 0 0)
MYO15_HUMAN Myosin-XV (Unconventional myosin-15)	0.00112957	32.0731	394925	13124361	4 (2 0 2 0 0)
SYN2_HUMAN Synapsin-2 (Synapsin II)	2.16041e-06	30.1972	62928.8	6686022	3 (3 0 0 0 0)
tyrosine 3/tryptophan 5 -monooxygenase activation protein, theta polype	3.01641e-08	30.191	27746.8	5803227	5 (5 0 0 0 0)
spectrin, beta, non-erythrocytic 2 [Homo sapiens]	2.60176e-07	30.165	271125	5902122	5 (1 1 3 0 0)
fascin 1 [Homo sapiens]	4.38666e-08	30.1642	54496.1	4507115	3 (3 0 0 0 0)
PREDICTED: aspartate aminotransferase 2 isoform 2 [Pan troglodytes]	0.000317381	30.1547	47445.3	114662906	3 (3 0 0 0 0)
mitogen-activated protein kinase kinase 1 [Homo sapiens]	0.000100728	30.1522	43411.3	5579478	5 (3 0 1 1 0)
EHD3_HUMAN EH domain-containing protein 3	4.75617e-07	30.1397	61857.2	18203332	4 (4 0 0 0 0)
ATPase, Ca++ transporting, cardiac muscle, slow twitch 2 isoform 1 [Ho	0.00130431	30.1358	114683	24638454	3 (3 0 0 0 0)
A30802 Ca2+-transporting ATPase (EC 3.6.3.8) 2, plasma membrane - human	1.43688e-05	30.1305	134625	86988	3 (3 0 0 0 0)
guanine nucleotide-binding protein, beta-3 subunit [Homo sapiens]	0.00884742	30.1191	37196.9	4504053	6 (2 2 1 1 0)
B46091 H+-exporting ATPase (EC 3.6.3.6) chain A, vacuolar (VA68 type) - human	1.49315e-06	30.1151	68204.5	1082432	3 (3 0 0 0 0)
S38532 protein 14-3-3 eta chain - human	1.84533e-05	30.1147	28172	481365	4 (4 0 0 0 0)
transmembrane protein 10 isoform a [Homo sapiens]	0.000903662	30.1136	15673	15082236	3 (3 0 0 0 0)
syntaxin binding protein 1 [Rattus norvegicus]	1.85647e-05	30.1132	67525.9	6981602	3 (3 0 0 0 0)
KIAA0397 protein [Homo sapiens]	0.00256309	30.1096	114107	20521033	5 (2 1 2 0 0)
voltage-dependent anion channel 3 [Homo sapiens]	0.000687805	30.1092	30639.3	25188179	3 (3 0 0 0 0)
guanine nucleotide-binding protein, beta-1 subunit [Mus musculus]	2.4156e-06	30.1035	37353	6680045	4 (4 0 0 0 0)
unnamed protein product [Homo sapiens]	0.00785572	30.1012	128053	34535211	4 (2 0 1 1 0)
gelsolin isoform a precursor [Homo sapiens]	0.000146363	30.0999	85644.2	4504165	3 (3 0 0 0 0)
polyprotein [Human enterovirus 87]	0.00271156	30.097	244470	61608303	4 (1 1 2 0 0)
phosphoglycerate dehydrogenase [Homo sapiens]	0.00109678	30.0922	56614.5	23308577	4 (1 2 0 1 0)
novel protein similar to vertebrate Fraser syndrome 1 homolog (human)	0.00763296	30.074	436539	122890828	5 (1 0 3 0 1)
KIAA1401 protein [Homo sapiens]	0.00631768	30.0644	96987.6	7243183	4 (1 2 0 1 0)
similar to GenBank Accession Number AF045184 nuclear receptor coactivato	0.00173338	28.1416	25758.4	29841015	24 (3 9 4 5 3)
isocitrate dehydrogenase (NADP+) [Homo sapiens]	0.000451216	28.1405	50915.9	872121	3 (2 1 0 0 0)
KIAA1007 protein [Homo sapiens]	0.00978553	28.0936	206196	20521724	5 (1 2 0 0 2)
hydroxyacid oxidase 2 [Homo sapiens]	0.00180708	28.0916	38814.3	7705393	3 (2 1 0 0 0)
B Chain B, T-To-T(High) Quaternary Transitions In Human Hemoglobin: Deshis146b	0.00270411	28.0916	15720.2	61679604	4 (3 1 0 0 0)
hypothetical protein LOC738 [Homo sapiens]	0.00703297	28.0891	85988.4	8393009	4 (1 1 1 1 0)
sarcoma antigen NY-SAR-41 [Homo sapiens]	0.00230175	28.0694	163828	62243484	4 (1 2 0 0 1)
tubulin, beta, 2 [Homo sapiens]	6.66735e-08	26.1745	49799	5174735	19 (8 7 3 0 1)
Tubulin, beta [Homo sapiens]	0.00321072	26.1648	49640	18088719	6 (1 5 0 0 0)
solute carrier family 17, member 7 [Homo sapiens]	7.53869e-05	26.1411	61573.3	9945322	4 (3 0 1 0 0)
beta actin [Homo sapiens]	5.22289e-07	26.1276	41709.7	4501885	6 (4 0 0 1 1)
MAP1A_HUMAN Microtubule-associated protein 1A (MAP 1A) (Proliferation-related	0.00527158	26.0975	306342	51338794	6 (0 2 2 1 1)
septin 3 isoform A [Homo sapiens]	0.00691577	26.0911	39320.4	22035572	3 (2 0 1 0 0)
PREP_HUMAN Presequence protease, mitochondrial precursor (hPreP) (Pitrilysin	0.000412649	26.089	117380	115311843	6 (1 1 0 2 2)
novel protein similar to human ATPase, Class I, type 8B, member 1 (ATP8	0.00217047	26.086	119193	27802717	3 (2 0 1 0 0)
chondroitin sulfate glucuronyltransferase [Homo sapiens]	0.000561001	26.0787	85094	51105925	4 (1 0 2 1 0)
KIAA1131 protein [Homo sapiens]	0.00403133	26.0778	241200	71891695	4 (0 1 3 0 0)
hypothetical protein [Homo sapiens]	0.00220818	26.0509	302759	31874607	3 (2 0 1 0 0)
hypothetical protein LOC345651 [Homo sapiens]	0.000601892	24.1354	41976	63055057	6 (0 3 2 1 0)
cytochrome c oxidase subunit Vb precursor [Homo sapiens]	0.00154204	24.1155	13686.9	17017988	3 (2 0 0 1 0)
cone cGMP phosphodiesterase [Homo sapiens]	0.00462316	24.0806	99097.2	1149517	5 (1 1 0 2 1)
ORF 64 [Human herpesvirus 8 type M]	0.008644	24.0777	289508	18846034	4 (1 1 0 1 1)
retinal short chain dehydrogenase reductase [Homo sapiens]	0.00109048	24.0683	34105.8	20269285	3 (1 1 1 0 0)
KIAA1414 protein [Homo sapiens]	0.00916672	24.0607	171853	7243209	4 (1 1 0 1 1)
unnamed protein product [Homo sapiens]	0.00431824	22.1639	40513	7021051	6 (1 4 0 1 0)
KIAA0338 [Homo sapiens]	0.00109343	22.1316	103516	2224617	3 (2 0 0 0 1)
large tumor suppressor 2 [Homo sapiens]	0.00634468	22.1268	115250	7212790	5 (1 2 2 0 0)
KIAA0244 [Homo sapiens]	0.00711742	22.0866	229950	20521870	4 (0 0 3 1 0)
leucine zipper, down-regulated in cancer 1-like [Homo sapiens]	0.00025599	22.0847	26137.5	49355807	3 (1 1 0 1 0)
zinc finger and SCAN domain containing 10 [Homo sapiens]	0.0026556	22.0824	80336	14249488	4 (1 1 0 0 2)
zinc finger protein 198 [Homo sapiens]	0.00411289	22.08	154810	4508011	3 (2 0 0 0 1)
AHI1 protein [Homo sapiens]	0.00345469	22.0797	120793	20797214	5 (2 0 1 1 1)
T08851 Down syndrome cell adhesion protein 1 - human (fragment)	0.000300102	22.0544	209653	7512400	3 (2 0 0 0 1)
histone H2A [Homo sapiens]	6.55746e-08	20.2815	13986.8	28195394	9 (8 1 0 0 0)
syntaxin 1B2 [Rattus norvegicus]	3.06857e-07	20.2028	33223.8	6981600	2 (2 0 0 0 0)
microtubule-associated protein, RP/EB family, member 2 [Homo sapiens]	2.43839e-05	20.1934	37008.2	10346135	2 (2 0 0 0 0)
phosphatidylinositol-4-phosphate 5-kinase type II beta [Homo sapiens]	3.58513e-11	20.1894	47347.8	4505819	2 (2 0 0 0 0)
neural cell adhesion molecule 1 isoform 3 [Homo sapiens]	1.40726e-06	20.1666	83718	115529478	2 (2 0 0 0 0)
collapsin response mediator protein 1 isoform 2 [Homo sapiens]	1.63368e-06	20.1399	62144.8	4503051	4 (3 1 0 0 0)
A Chain A, Human Heart L-Lactate Dehydrogenase H Chain, Ternary Complex With N	0.00156294	20.1374	36484.1	13786847	2 (2 0 0 0 0)
WD repeat-containing protein 1 isoform 1 [Homo sapiens]	6.0269e-08	20.1341	66151.9	9257257	2 (2 0 0 0 0)
KIAA0320 [Homo sapiens]	5.07249e-07	20.1337	202862	20520997	3 (3 0 0 0 0)
phosphoglycerate mutase 2 (muscle) [Homo sapiens] [M	8.61158e-08	20.1321	28201.4	51094513	5 (4 1 0 0 0)
phosphoglycerate mutase family 3 [Homo sapiens]	0.000110801	20.1319	28758.8	71274132	6 (2 2 1 1 0)
unnamed protein product [Homo sapiens]	5.45473e-05	20.1315	39566.4	10435335	3 (3 0 0 0 0)
synaptotagmin I [Homo sapiens]	0.000753701	20.1306	47542.8	5032139	2 (2 0 0 0 0)
hypothetical protein ( (L11645) alpha-tubulin [Homo sapiens] ) [Neuros	0.00858027	20.13	10326.7	85091443	2 (2 0 0 0 0)
PREDICTED: hypothetical protein isoform 1 [Pan troglodytes]	0.000132124	20.128	57495.2	114587520	5 (3 1 1 0 0)
phosphoprotein enriched in astrocytes 15 [Homo sapiens]	9.85976e-06	20.1258	15030.8	4505705	3 (3 0 0 0 0)
phosphoglycerate mutase 1 (brain) [Homo sapiens]	8.54269e-05	20.1256	28785.8	4505753	6 (6 0 0 0 0)
microsomal glutathione S-transferase 3 [Homo sapiens]	1.78339e-06	20.1228	16505.6	4758714	3 (3 0 0 0 0)
tubulin, alpha 4 [Mus musculus]	6.59677e-08	20.1201	49892.4	6678467	5 (4 1 0 0 0)
brain glycogen phosphorylase [Homo sapiens]	4.33837e-07	20.1157	96634.7	21361370	2 (2 0 0 0 0)
HSP70-HOM [Homo sapiens]	0.000375986	20.1124	70361.4	4529894	2 (2 0 0 0 0)
protein kinase C, gamma [Homo sapiens]	0.000283501	20.1114	78397.3	13384594	3 (1 0 1 1 0)
alanyl-tRNA synthetase [Homo sapiens]	0.00575078	20.1105	106734	1015321	3 (1 1 0 0 1)
CN145_HUMAN Uncharacterized protein C14orf145	0.00585762	20.1074	73526.3	71153197	9 (1 2 3 3 0)
eukaryotic translation initiation factor 3, subunit 6 48kDa [Homo sapie	0.00904575	20.1063	52187.5	4503521	5 (3 1 1 0 0)
claudin 11 [Homo sapiens]	0.00334277	20.1051	21978.4	10938016	6 (3 1 1 0 1)
unnamed protein product [Homo sapiens]	9.28289e-07	20.101	52406.5	21757045	3 (1 0 1 1 0)
KIAA0041 [Homo sapiens]	0.000430477	20.0985	88243.3	27529706	2 (2 0 0 0 0)
heterogeneous nuclear ribonucleoprotein A2/B1 isoform A2 [Homo sapiens]	0.00114754	20.095	35983.8	4504447	3 (3 0 0 0 0)
MTMR6_HUMAN Myotubularin-related protein 6	0.00767641	20.0932	71908.2	33112672	3 (1 0 1 1 0)
transmembrane protein 30A [Homo sapiens]	0.00375596	20.0912	40657.7	8922720	3 (1 1 0 0 1)
unnamed protein product [Homo sapiens]	0.00212421	20.089	158980	10435855	4 (0 3 0 1 0)
B Chain B, Ligand-Free Heterodimeric Human Glutathione S-Transferase M2-3 (Ec 2	0.00428317	20.0848	26411.1	5822511	2 (2 0 0 0 0)
PLIN_HUMAN Perilipin (PERI) (Lipid droplet-associated protein)	0.001592	20.0838	55915.9	8134637	4 (3 1 0 0 0)
unnamed protein product [Homo sapiens]	0.00554235	20.077	93560.2	14042419	5 (1 1 1 0 2)
unnamed protein product [Homo sapiens]	0.00631066	20.076	53331.2	34530959	3 (2 0 0 0 1)
hypothetical protein [Homo sapiens]	0.000373648	20.0691	113923	21732286	3 (1 1 0 0 1)
novel protein similar to human THO complex 2 (THOC2) [Danio rerio] [MAS	0.00559987	20.0677	163398	27802720	4 (0 0 3 0 1)
unnamed protein product [Homo sapiens]	0.00210553	20.0515	148810	34534922	4 (2 0 1 0 1)
pyruvate dehydrogenase (lipoamide) beta [Homo sapiens]	0.000883427	18.1623	39224.1	4505687	2 (1 1 0 0 0)
DPYL4_HUMAN Dihydropyrimidinase-related protein 4 (DRP-4) (Collapsin response	5.7736e-06	18.152	61838.5	68067941	4 (1 3 0 0 0)
heat shock 70kDa protein 2 [Homo sapiens]	0.000120469	18.1501	69978	13676857	2 (1 1 0 0 0)
peroxiredoxin 5 precursor, isoform a [Homo sapiens]	1.78162e-05	18.1445	22012.5	6912238	2 (1 1 0 0 0)
CE152_HUMAN Centrosomal protein of 152 kDa (Cep152 protein)	0.00105457	18.1373	147252	62286590	7 (1 2 1 2 1)
flavin containing monooxygenase 1 [Homo sapiens]	0.00343578	18.1357	60271.9	4503755	4 (1 2 1 0 0)
ADEN_ADE03 Adenain (Endoprotease) (Late L3 23 kDa protein)	0.00165563	18.1279	23778.5	139365	3 (1 1 0 1 0)
glutamate transporter [Homo sapiens]	0.00233219	18.1197	61664.6	488752	9 (2 1 1 3 2)
clusterin isoform 2 [Homo sapiens]	6.78464e-07	18.1171	52461.1	42740907	2 (1 1 0 0 0)
fer (fps/fes related) tyrosine kinase (phosphoprotein NCP94) [Homo sa	0.00567286	18.1014	94577.8	119964721	3 (1 0 1 0 1)
septin 5 [Homo sapiens]	0.000140146	18.0975	42749.7	9945439	2 (1 1 0 0 0)
likely ortholog of rat brain-enriched guanylate kinase-associated prot	0.00436559	18.0952	64762.9	13124765	3 (1 0 1 0 1)
IQGA3_HUMAN Ras GTPase-activating-like protein IQGAP3	0.00746953	18.0948	184431	49036087	2 (1 1 0 0 0)
DDX20_HUMAN Probable ATP-dependent RNA helicase DDX20 (DEAD box protein 20) (	0.00288518	18.0904	92182.4	12643886	4 (0 1 1 0 2)
radixin [Homo sapiens]	0.00233176	18.0894	68521.5	4506467	4 (0 0 2 1 1)
PHYIP_HUMAN Phytanoyl-CoA hydroxylase-interacting protein (Phytanoyl-CoA hydro	0.00351669	18.0856	37548.4	2495731	2 (1 1 0 0 0)
KIAA1755 protein [Homo sapiens]	0.00527645	18.0837	120905	12698055	3 (1 0 1 0 1)
succinate-CoA ligase, ADP-forming, beta subunit [Homo sapiens]	0.00202881	18.0834	50285.3	11321583	3 (0 0 3 0 0)
heat shock 27kDa protein 1 [Homo sapiens]	0.00110847	18.0813	22768.5	4504517	2 (1 1 0 0 0)
protein kinase C, alpha [Homo sapiens]	0.000421597	18.079	76714.2	4506067	2 (1 1 0 0 0)
hypothetical protein LOC79441 [Homo sapiens]	0.00965683	18.0776	69606.9	56711324	3 (0 2 0 0 1)
proteoglycan PG-M(V3) [Homo sapiens]	0.000523552	18.0671	74200.6	1008913	2 (1 1 0 0 0)
C Chain C, Crystal Structure Of Fibrinogen Fragment D	0.00913314	18.0633	36157.4	2781209	2 (1 1 0 0 0)
AF224710_1 amyloid precursor interacting protein type I [Homo sapiens]	0.00734943	18.0606	52333.1	7630292	2 (1 1 0 0 0)
guanylate cyclase 2D, membrane (retina-specific) [Homo sapiens]	0.00721942	18.06	119983	4504217	3 (0 1 1 1 0)
KIAA0780 protein [Homo sapiens]	0.00357487	18.0563	123920	3882281	20 (5 3 3 6 3)
SH2B adaptor protein 3 [Homo sapiens]	0.00173611	18.0561	63185.7	4885455	3 (0 1 1 1 0)
SUCA_HUMAN Succinyl-CoA ligase [GDP-forming] subunit alpha, mitochondrial pre	1.73821e-06	16.1511	35025.2	20141765	2 (1 0 1 0 0)
TBB4Q_HUMAN Tubulin beta-4q chain	5.82837e-10	16.1337	48403.5	12643363	7 (1 4 1 1 0)
AF142498_1 14-3-3 gamma protein [Homo sapiens]	0.00945595	16.133	28356.8	5726310	2 (0 2 0 0 0)
PREDICTED: similar to peptidylprolyl isomerase A isoform 1 [Homo sapie	4.29225e-05	16.1264	18098.8	88961806	2 (1 0 1 0 0)
5'-3' exoribonuclease 1 isoform a [Homo sapiens]	0.00122578	16.1196	193984	110624792	5 (1 1 0 1 2)
ARP1 actin-related protein 1 homolog A, centractin alpha [Homo sapiens]	0.000149035	16.1162	42586.9	5031569	2 (1 0 1 0 0)
A Chain A, The Yeast Actin Val 159 Asn Mutant Complex With Human Gelsolin Segme	0.00898471	16.1151	41677.8	7546413	5 (2 0 1 1 1)
WD repeat domain 6 protein [Homo sapiens]	0.00641844	16.113	121647	11072093	2 (1 0 1 0 0)
gag protein [Human immunodeficiency virus 1]	0.00116252	16.1106	12082.4	73913213	2 (1 0 1 0 0)
T00329 hypothetical protein KIAA0553 - human (fragment)	0.00139663	16.1043	118764	7513015	3 (1 0 0 1 1)
destrin isoform a [Homo sapiens]	4.05445e-06	16.0932	18493.5	5802966	3 (2 0 1 0 0)
PREDICTED: proline rich Gla (G-carboxyglutamic acid) 1 isoform 1 [Mus	0.00360943	16.0863	25044.6	63746591	2 (0 2 0 0 0)
hCG2013788 [Homo sapiens]	0.00765974	16.0845	8365.31	119586875	4 (0 1 2 0 1)
pol protein [Human immunodeficiency virus 1]	0.00174566	16.0792	115036	67866569	2 (1 0 1 0 0)
epidermal growth factor receptor pathway substrate 8 [Homo sapiens]	0.00713192	16.0783	91824.5	56682953	3 (0 0 2 1 0)
hypothetical protein [Homo sapiens]	0.00970282	16.0775	114385	21740085	2 (0 2 0 0 0)
G01523 heat shock protein 27 - human	0.00260413	16.0722	26751.5	7512479	2 (1 0 1 0 0)
CGHU2E collagen alpha 2(XI) chain precursor - human (fragment)	0.00980073	16.0707	151080	1360671	3 (1 0 0 1 1)
ATS20_HUMAN ADAMTS-20 precursor (A disintegrin and metalloproteinase with thr	0.000131774	16.0689	214514	29611731	2 (1 0 1 0 0)
KIAA1252 protein [Homo sapiens]	0.000461107	16.0685	64919.6	6330874	2 (0 2 0 0 0)
engulfment and cell motility 3 [Homo sapiens] [MAS	0.00417335	16.0646	87046.1	87298935	3 (1 0 2 0 0)
unnamed protein product [Homo sapiens]	0.00338214	16.064	62565.4	7021993	3 (0 1 1 0 1)
UL10 [Human herpesvirus 5]	0.00552342	16.0636	29011.9	39841722	2 (0 2 0 0 0)
tweety homolog 3 (Drosophila) [Homo sapiens]	0.000391179	16.0599	102523	51094709	2 (1 0 1 0 0)
ZN200_HUMAN Zinc finger protein 200	0.00966592	16.0597	45373.8	6226509	3 (1 0 0 1 1)
PREDICTED: similar to human immunodeficiency virus type I enhancer bi	0.00881967	16.055	253790	109475416	2 (1 0 1 0 0)
zinc finger protein 225 [Homo sapiens]	0.00626381	16.0501	82417.9	110347439	2 (1 0 1 0 0)
nef protein [Human immunodeficiency virus 1]	0.00030495	16.049	24388.9	94538716	2 (1 0 1 0 0)
vacuolar protein sorting 35 [Homo sapiens]	2.64447e-08	14.1823	91649.1	17999541	3 (2 0 0 1 0)
human PGP 9.5 homologue [cattle, Peptide Partial, 25 aa]	1.32085e-05	14.1657	2810.49	236733	3 (0 2 1 0 0)
glycoprotein M6A isoform 1 [Homo sapiens]	1.52076e-06	14.1554	31188.4	14149619	2 (1 0 0 1 0)
phosphodiesterase 2A, cGMP-stimulated [Homo sapiens]	1.59585e-09	14.1437	105649	4505657	2 (1 0 0 1 0)
S-laminin [Homo sapiens]	0.0017772	14.1391	66658.8	288401	2 (1 0 0 1 0)
gag protein [Human immunodeficiency virus 1]	0.00210324	14.1387	55119.2	90812182	4 (1 2 0 1 0)
formin-like 1 [Homo sapiens]	0.00882281	14.1147	121751	33356148	3 (0 1 0 1 1)
atlastin isoform a [Homo sapiens]	0.00905417	14.1121	63503.4	19923445	2 (1 0 0 1 0)
envelope glycoprotein [Human immunodeficiency virus 1]	0.000953524	14.1039	51132.2	56266832	2 (0 1 1 0 0)
solute carrier family 12 (sodium/potassium/chloride transporters), memb	0.000244688	14.0912	131364	4506975	2 (1 0 0 1 0)
staphylococcal nuclease domain containing 1 [Homo sapiens]	0.00123791	14.0889	101934	77404397	3 (1 1 1 0 0)
ENV_HV2D2 Envelope glycoprotein gp160 precursor (Env polyprotein) [Contains: S	0.000243196	14.0856	98543.9	1352375	3 (0 2 1 0 0)
replication protein E1 [Human papillomavirus type 24]	0.00534208	14.0824	69502.4	9628489	3 (0 1 0 1 1)
NSP4 [Human rotavirus C]	0.0063711	14.0811	17700.8	1841375	2 (0 1 1 0 0)
PREDICTED: similar to 14-3-3 protein epsilon (14-3-3E) (Mitochondrial	0.000199321	14.0785	29584.7	51460811	2 (0 1 1 0 0)
unnamed protein product [Homo sapiens]	0.00669446	14.0755	58005.6	28193156	5 (0 0 2 3 0)
A Chain A, Human Inducible Nitric Oxide Synthase With Inhibitor	0.000849801	14.0754	49365.7	7245982	3 (0 0 2 0 1)
SERC2_HUMAN Serine incorporator 2 (Tumor differentially expressed 2-like)	0.00162334	14.0731	50836.4	38258637	2 (1 0 0 1 0)
thymidine kinase [Human herpesvirus 2]	0.00220017	14.0728	40442.9	5926727	3 (0 0 2 0 1)
myelin protein zero [Homo sapiens]	0.00158889	14.0702	27932.7	469517	2 (1 0 0 1 0)
PREDICTED: THO complex 5 isoform 7 [Pan troglodytes]	0.00939206	14.0691	78486.1	114685751	2 (1 0 0 1 0)
hypothetical protein LOC65250 [Homo sapiens] [MAS	0.0023748	14.0688	236367	38604073	2 (1 0 0 1 0)
KIAA1775 protein [Homo sapiens]	0.00413397	14.0682	93406	14625445	2 (1 0 0 1 0)
platelet-derived growth factor receptor alpha precursor [Homo sapiens]	0.00407914	14.0663	122592	5453870	3 (1 0 0 0 2)
aurora/IPL1-related kinase [Homo sapiens]	3.54197e-05	14.0656	45905.2	2641948	2 (0 1 1 0 0)
hypothetical protein LOC200373 [Homo sapiens]	0.00168832	14.0654	64193.4	71725367	2 (1 0 0 1 0)
eukaryotic translation initiation factor 2B, subunit 1 alpha, 26kDa [Ho	0.00558059	14.0623	33690.8	4503503	3 (0 0 1 2 0)
connexin 43 [Homo sapiens]	5.39458e-05	14.0517	42980.9	4504001	2 (1 0 0 1 0)
neurotrypsin precursor [Homo sapiens]	0.00994857	14.044	96949.4	4506143	2 (0 1 1 0 0)
PLCD1_HUMAN 1-phosphatidylinositol-4,5-bisphosphate phosphodiesterase delta 1	0.00428336	14.0371	85709.1	1730575	2 (0 1 1 0 0)
unnamed protein product [Homo sapiens]	0.00528744	14.0358	56614.7	16553074	3 (0 1 1 1 0)
PREDICTED: similar to cytoplasmic beta-actin [Homo sapiens]	2.73568e-07	12.1659	17124.6	88942898	16 (1 3 1 2 9)
hypothetical protein LOC158763 [Homo sapiens]	0.00535752	12.1514	61625.8	40255080	4 (2 1 0 0 1)
hCG1747788 [Homo sapiens]	0.0095085	12.1474	14554.8	119608911	6 (0 0 5 1 0)
mitochondrial glutamate carrier 1 [Homo sapiens]	1.73512e-08	12.1387	34448.3	13375983	6 (5 0 0 0 1)
ADP-ribosylation factor-like 10C [Homo sapiens]	0.000657102	12.1231	21525.2	8922601	2 (1 0 0 0 1)
myelin oligodendrocyte glycoprotein [Homo sapiens] [M	0.000116225	12.1156	28175	793839	3 (2 0 0 0 1)
Hypothetical protein FLJ33706 [Homo sapiens]	0.00902327	12.1131	21146	85397884	8 (6 0 1 0 1)
PREDICTED: similar to peptidylprolyl isomerase A isoform 1 [Homo s	0.00522697	12.1016	30173.3	113412798	2 (0 1 0 1 0)
translin-associated factor X interacting protein 1 [Homo sapiens]	0.000251659	12.1005	76724.8	110227629	2 (0 1 0 1 0)
ZNF91_HUMAN Zinc finger protein 91 (Zinc finger protein HTF10) (HPF7)	0.00495554	12.0998	137137	549839	2 (0 1 0 1 0)
autogenous vein graft remodeling associated protein 8 [Homo sapiens] [	0.00836024	12.0922	80577.5	125858428	3 (0 0 0 3 0)
phosphoglycerate kinase 1 [Homo sapiens]	0.00704505	12.0895	44586.2	4505763	2 (1 0 0 0 1)
dolichol monophosphate mannose synthase [Homo sapiens]	0.000213985	12.089	28800.3	2258418	3 (1 0 0 1 1)
Rho GTPase activating protein 6 isoform 1 variant [Homo sapiens]	0.00137851	12.0876	79711.9	62087164	2 (0 0 2 0 0)
AF279689_1 fibroblast growth factor receptor 5 [Homo sapiens]	0.00118475	12.0828	54533.5	13447749	3 (0 0 2 1 0)
APG7 autophagy 7-like [Homo sapiens]	0.00879279	12.0813	77909.4	5453668	3 (0 1 1 1 0)
KIAA0423 [Homo sapiens]	0.000873179	12.08	189595	20521047	2 (0 1 0 1 0)
peroxisome proliferator-activated receptor gamma, coactivator 1 beta [	0.00483063	12.0767	113124	31543392	4 (1 0 1 1 1)
envelope glycoprotein [Human immunodeficiency virus 1]	0.00335778	12.0766	39572.1	61741692	3 (0 1 2 0 0)
unnamed protein product [Homo sapiens]	0.00550748	12.0762	37237.2	16552323	2 (0 1 0 1 0)
envelope glycoprotein [Human immunodeficiency virus 1]	0.00820336	12.076	95392.1	57901104	4 (1 1 1 0 1)
KIAA0566 protein [Homo sapiens]	0.00127165	12.0759	129279	3043656	2 (0 0 2 0 0)
pol protein [Human immunodeficiency virus 2]	0.00590451	12.0704	54703.1	148751052	2 (0 1 0 1 0)
novel protein similar to human obscurin, cytoskeletal calmodulin and t	0.00923241	12.0699	180129	148880026	3 (0 1 0 0 2)
calpain 11 [Homo sapiens]	0.00789966	12.0658	80531.1	5901916	2 (0 0 2 0 0)
podocalyxin-like isoform 2 precursor [Homo sapiens]	0.00929785	12.0658	55351.5	33598950	2 (0 1 0 1 0)
hCG1782854, isoform CRA_b [Homo sapiens]	0.0093454	12.063	53684.2	119582099	3 (0 1 0 1 1)
stomatin (EPB72)-like 2 [Homo sapiens]	2.3316e-05	12.0615	38510.2	7305503	2 (1 0 0 0 1)
KIAA1434 protein [Homo sapiens]	0.000478899	12.058	76584.9	7243266	3 (0 0 1 1 1)
GNAS complex locus isoform e [Homo sapiens]	0.00955872	12.058	67905.9	117938768	2 (1 0 0 0 1)
KIAA1439 protein [Homo sapiens]	0.00301379	12.0564	61723.3	7243276	2 (0 0 2 0 0)
FLJ00007 protein [Homo sapiens]	0.00128376	12.0493	77961.9	7209315	2 (1 0 0 0 1)
UDP-N-acetyl-alpha-D-galactosamine:polypeptide N-acetylgalactosaminyltr	0.00256673	12.0455	63949.1	27530993	2 (0 0 2 0 0)
Env [Human immunodeficiency virus type 1]	0.00965818	12.0449	97063.2	4324789	2 (1 0 0 0 1)
novel protein similar to human tubulin tyrosine ligase-like family, mem	0.00711897	12.0429	65317.9	55962352	3 (0 1 0 0 2)
mitogen-activated protein kinase kinase kinase 13 [Homo sapiens]	0.00721725	12.0406	108228	4758696	2 (0 1 0 1 0)
tubulin, alpha 1a [Mus musculus]	1.611e-06	10.195	49927.7	6678465	2 (2 0 0 0 0)
isocitrate dehydrogenase 2 (NADP+), mitochondrial precursor [Homo sapi	6.66491e-09	10.1895	50876.9	28178832	1 (1 0 0 0 0)
ferritin, heavy polypeptide 1 [Homo sapiens]	5.09334e-06	10.1873	21212.3	56682959	1 (1 0 0 0 0)
zinc finger, CDGSH-type domain 1 [Homo sapiens]	1.20151e-06	10.1817	12191.2	8923930	1 (1 0 0 0 0)
heat shock 70kDa protein 8 isoform 2 [Homo sapiens]	1.69504e-07	10.1801	53484.5	24234686	1 (1 0 0 0 0)
H2A histone family, member O [Homo sapiens]	4.46368e-07	10.1769	14086.9	4504251	3 (3 0 0 0 0)
unnamed protein product [Homo sapiens]	0.000117387	10.1756	31292.4	7020000	1 (1 0 0 0 0)
DREB_HUMAN Drebrin (Developmentally-regulated brain protein)	2.46664e-09	10.174	71381.6	2498313	1 (1 0 0 0 0)
EPB41L3 protein [Homo sapiens]	5.45565e-06	10.1642	96454.3	13544009	3 (3 0 0 0 0)
A Chain A, The 1.9-A Crystal Structure Of The Noncollagenous (Nc1) Domain Of H	0.000169709	10.1606	25314	21466080	1 (1 0 0 0 0)
neurofilament, light polypeptide 68kDa, isoform CRA_b [Homo sapiens] [M	0.000138363	10.1593	56924	119584005	1 (1 0 0 0 0)
RAB3A, member RAS oncogene family [Homo sapiens]	4.86118e-05	10.1584	24968.1	4506367	1 (1 0 0 0 0)
PREDICTED: similar to [Human Golli-mbp gene, complete cds.], gene	0.00055021	10.1565	33065.3	149721255	4 (2 2 0 0 0)
profilin 2 isoform a [Homo sapiens]	6.42822e-06	10.1524	15036.3	16753215	1 (1 0 0 0 0)
AF383252_1 envelope glycoprotein [Human immunodeficiency virus type 1]	0.000116828	10.1517	99498.1	19773785	3 (1 0 2 0 0)
EBNA-2 co-activator variant [Homo sapiens]	0.00642108	10.1495	107366	62088600	2 (2 0 0 0 0)
CSE1 chromosome segregation 1-like protein [Homo sapiens]	0.00311902	10.1494	110346	29029559	1 (1 0 0 0 0)
tubulin, alpha 8 [Homo sapiens]	0.00218855	10.1491	50061.6	9507215	2 (1 0 0 1 0)
calreticulin precursor [Homo sapiens]	0.00117178	10.1465	48111.9	4757900	1 (1 0 0 0 0)
neighbor of BRCA1 gene 2, isoform CRA_b [Homo sapiens]	0.00562504	10.1454	20074.7	119581348	3 (1 2 0 0 0)
envelope glycoprotein [Human immunodeficiency virus type 1]	0.00807037	10.1376	29370	4679497	3 (3 0 0 0 0)
CD27-binding (Siva) protein isoform 1 [Homo sapiens]	0.00505141	10.1358	18682	11277468	1 (1 0 0 0 0)
envelope glycoprotein [Human immunodeficiency virus 1]	0.00264912	10.1333	14777.7	50981511	2 (2 0 0 0 0)
contactin associated protein 1 [Homo sapiens]	2.75713e-05	10.1269	156167	4505463	1 (1 0 0 0 0)
lanthionine synthetase C-like protein 1 [Homo sapiens]	9.27387e-05	10.1267	45253.6	5174445	4 (4 0 0 0 0)
heterogeneous nuclear ribonucleoprotein K [Mus musculus]	0.00346603	10.125	50944.4	13384620	1 (1 0 0 0 0)
Thy-1 cell surface antigen [Homo sapiens]	0.000365379	10.1249	17923.3	19923362	2 (2 0 0 0 0)
PREDICTED: similar to likely orthologue of Homo sapiens tubulin be	0.00188682	10.1249	50305.6	126303146	6 (1 3 1 1 0)
NADH dehydrogenase (ubiquinone) 1 alpha subcomplex, 7, 14.5kDa [Pa	5.70649e-06	10.1241	13172	120952308	1 (1 0 0 0 0)
karyopherin beta 1 [Homo sapiens]	0.00797623	10.1227	97108.2	19923142	2 (2 0 0 0 0)
eukaryotic translation elongation factor 1 alpha 2 [Homo sapiens]	9.97784e-05	10.1192	50438.4	4503475	1 (1 0 0 0 0)
neurofilament-66; NF-66 [Homo sapiens]	0.000903515	10.1188	54875.2	994844	2 (2 0 0 0 0)
hypothetical protein [Homo sapiens]	0.0010087	10.1186	30853.5	31874254	1 (1 0 0 0 0)
A Chain A, Crystal Structure Of Truncated Human Rhogdi Quadruple Mutant	9.33767e-09	10.1168	15799	14278159	2 (2 0 0 0 0)
nef protein [Human immunodeficiency virus 1]	0.00180079	10.1163	22390	56783219	1 (1 0 0 0 0)
HGSNAT protein [Homo sapiens]	0.00285608	10.116	23614.5	27469769	1 (1 0 0 0 0)
MHC class I antigen [Homo sapiens]	0.00261096	10.1157	21156.4	45157139	3 (1 1 0 1 0)
cytochrome c oxidase subunit VIIa polypeptide 2 (liver) precursor [Homo	0.000116751	10.1152	9390.1	4502989	1 (1 0 0 0 0)
XIAP associated factor-1 (ZAP-1) [Homo sapiens] [MA	0.00214885	10.1121	36890.9	1869901	2 (1 0 0 1 0)
alpha-spectrin [Homo sapiens]	0.00923704	10.1084	43790.8	829111	1 (1 0 0 0 0)
vpu protein [Human immunodeficiency virus type 1]	0.00248647	10.1082	10072.4	11321004	9 (3 5 1 0 0)
envelope protein [Human immunodeficiency virus 1]	0.00548669	10.1081	96899.4	11124717	1 (1 0 0 0 0)
polyubiquitin [Homo sapiens]	0.00456238	10.107	68450.1	2627129	1 (1 0 0 0 0)
gp160 [Human immunodeficiency virus 1]	0.000953524	10.1056	96239.5	18996230	1 (1 0 0 0 0)
E1B 55K [Human adenovirus 5]	0.00165772	10.1037	54963.9	56160532	1 (1 0 0 0 0)
unnamed protein product [Homo sapiens]	0.00358185	10.1027	29361.5	7020238	1 (1 0 0 0 0)
seryl-tRNA synthetase 2 [Homo sapiens]	9.5041e-05	10.1026	58246	8923421	1 (1 0 0 0 0)
heterogeneous nuclear ribonucleoprotein A3 [Homo sapiens]	5.68521e-06	10.1015	39570.5	34740329	1 (1 0 0 0 0)
adenylyl cyclase-associated protein [Homo sapiens]	0.00532378	10.1011	51640.7	5453595	1 (1 0 0 0 0)
hypothetical protein [Homo sapiens]	0.0029051	10.0999	25834.8	34365210	2 (0 0 1 1 0)
unnamed protein product [Homo sapiens]	0.00144418	10.0993	23379.2	7022992	1 (1 0 0 0 0)
envelope glycoprotein [Human immunodeficiency virus 1]	0.000849237	10.0976	44417.7	35396916	1 (1 0 0 0 0)
PREDICTED: hypothetical protein [Homo sapiens]	0.00102415	10.0969	30218.9	113411981	1 (1 0 0 0 0)
Rb binding protein homolog [Homo sapiens]	0.00822349	10.0969	83420.3	5257005	2 (0 1 0 0 1)
hCG2036764, isoform CRA_a [Homo sapiens]	0.00210878	10.0947	11389.8	119569572	2 (1 1 0 0 0)
envelope glycoprotein [Human immunodeficiency virus 1]	0.00300077	10.0946	53606.8	110893742	1 (1 0 0 0 0)
ATP synthase, H+ transporting, mitochondrial F1 complex, delta subunit	1.98213e-05	10.0946	17479.2	4502297	1 (1 0 0 0 0)
NADH dehydrogenase (ubiquinone) 1 alpha subcomplex, 5 [Homo sapiens]	0.00749825	10.0943	13450.2	4826848	1 (1 0 0 0 0)
pol protein [Human immunodeficiency virus 1]	0.0061439	10.0941	49273.6	67937713	1 (1 0 0 0 0)
A Chain A, Crystal Structure Of Dictyostelium Discoideum Actin Complexed With	5.31606e-05	10.094	41574.7	28374049	1 (1 0 0 0 0)
tubulin, beta 5 [Mus musculus]	2.44298e-05	10.0936	49639	7106439	4 (4 0 0 0 0)
erythrocyte membrane protein 4.1N [Homo sapiens] [M	0.00635589	10.0927	97345.6	16356663	1 (1 0 0 0 0)
H2A histone family, member A [Homo sapiens]	0.00561948	10.0926	14127	10645195	2 (2 0 0 0 0)
hCG1644400 [Homo sapiens]	0.00626608	10.0921	21880.9	119590312	2 (2 0 0 0 0)
N-ethylmaleimide-sensitive factor [Homo sapiens] [M	0.000620594	10.0918	82542.2	21040484	1 (1 0 0 0 0)
envelope glycoprotein [Human immunodeficiency virus type 1]	0.0086843	10.0917	12834.9	14193890	1 (1 0 0 0 0)
hCG2042107 [Homo sapiens]	0.00206908	10.0913	17809.1	119623322	2 (2 0 0 0 0)
PREDICTED: hypothetical protein [Homo sapiens]	0.00768984	10.0912	19731.2	113416477	2 (1 0 1 0 0)
guanine nucleotide binding protein (G protein) alpha 12 [Homo sapiens]	0.00458141	10.0909	44251.4	42476111	1 (1 0 0 0 0)
ring finger and CCCH-type zinc finger domains 2 [Homo sapiens]	0.000658232	10.0905	96287.6	9256537	2 (1 1 0 0 0)
envelope glycoprotein [Human immunodeficiency virus 1]	0.000649077	10.09	3806.94	37362866	1 (1 0 0 0 0)
hypothetical protein PBCV1_A682L [Paramecium bursaria Chlorella virus 1	5.82073e-05	10.0888	39889.2	9632186	1 (1 0 0 0 0)
gag protein [Human immunodeficiency virus 1]	0.00704253	10.0883	55117.1	56608695	3 (2 0 1 0 0)
gag protein [Human immunodeficiency virus 1]	0.00910193	10.0874	54462.7	124389864	1 (1 0 0 0 0)
envelope gene [Human immunodeficiency virus 1]	0.00250713	10.0872	98975.8	510517	1 (1 0 0 0 0)
A Chain A, Cyclophilin A Complexed With Dipeptide Gly-Pro	0.000268381	10.0865	17869.8	1633054	1 (1 0 0 0 0)
MTFR1_HUMAN Mitochondrial fission regulator 1 (Chondrocyte protein with a pol	0.00191711	10.0864	36977.4	73920234	1 (1 0 0 0 0)
gp41 [Human immunodeficiency virus 1]	0.000780784	10.0863	27605.6	8920022	1 (1 0 0 0 0)
FLICE-like inhibitory protein short form [Homo sapiens]	0.00358038	10.0862	25362.5	2253681	4 (2 0 1 0 1)
unnamed protein product [Homo sapiens]	0.000306785	10.0861	20025.1	37610	1 (1 0 0 0 0)
glutathione S-transferase omega 2 [Homo sapiens]	0.00155101	10.0841	28235.2	38016131	1 (1 0 0 0 0)
hCG1790806, isoform CRA_a [Homo sapiens]	0.00206495	10.0827	28752	119628831	1 (1 0 0 0 0)
sodium channel, voltage-gated, type II, alpha isoform 1 [Homo sapiens]	0.00763337	10.0823	227825	93141210	1 (1 0 0 0 0)
envelope glycoprotein [Human immunodeficiency virus 1]	0.00522304	10.0821	13129.4	28916192	1 (1 0 0 0 0)
gag protein [Human immunodeficiency virus type 1] [	0.00197933	10.082	11958.2	12745855	1 (1 0 0 0 0)
ribonuclease, RNase A family, 10 (non-active) [Homo sapiens]	0.00508513	10.0819	23992.8	61175227	1 (1 0 0 0 0)
envelope glycoprotein [Human immunodeficiency virus type 1]	1.12556e-05	10.0816	28183.3	13625348	1 (1 0 0 0 0)
envelope glycoprotein [Human immunodeficiency virus 1]	0.000446875	10.0814	95369.9	82571413	2 (2 0 0 0 0)
guanine nucleotide binding protein (G protein), alpha inhibiting activi	4.54698e-06	10.0802	40425.1	4504041	1 (1 0 0 0 0)
immunoglobulin heavy chain VHDJ region [Homo sapiens]	0.00330219	10.0792	13456.7	21670775	1 (1 0 0 0 0)
aconitase 2 precursor [Homo sapiens]	0.00791139	10.0791	85372	4501867	1 (1 0 0 0 0)
human leucocyte antigen [Homo sapiens]	0.00503237	10.0771	20825.2	1702892	1 (1 0 0 0 0)
H2A histone family, member Z [Homo sapiens]	0.00962221	10.0769	13544.5	4504255	1 (1 0 0 0 0)
TCDD-inducible poly(ADP-ribose) polymerase [Homo sapiens]	0.00869023	10.0763	76178.4	38524594	1 (1 0 0 0 0)
WHSC1L1 protein isoform short [Homo sapiens]	0.00733719	10.076	72577	13699813	2 (0 1 0 0 1)
tetratricopeptide repeat domain 7B, isoform CRA_b [Homo sapiens]	0.00661923	10.0756	91951.9	119601840	1 (1 0 0 0 0)
envelope glycoprotein [Human immunodeficiency virus 1]	0.00255152	10.0755	10412.5	29422938	1 (1 0 0 0 0)
SC24B_HUMAN Protein transport protein Sec24B (SEC24-related protein B)	0.00082682	10.0755	137702	13124510	1 (1 0 0 0 0)
envelope glycoprotein [Human immunodeficiency virus 1]	0.00204961	10.0754	12900.7	38260759	2 (1 0 1 0 0)
reverse transcriptase [Human immunodeficiency virus type 1]	0.00733848	10.0753	25523.5	13506493	1 (1 0 0 0 0)
hCG2042391 [Homo sapiens]	0.00987619	10.0749	15698	119599792	1 (1 0 0 0 0)
envelope glycoprotein [Human immunodeficiency virus 1]	0.0044258	10.0748	97314	87245474	1 (1 0 0 0 0)
ubiquinol-cytochrome c reductase core protein I [Homo sapiens]	0.00350267	10.0747	52612.5	46593007	1 (1 0 0 0 0)
KIAA0980 protein, isoform CRA_c [Homo sapiens] [MA	0.00764467	10.0745	172726	119630489	2 (0 0 1 1 0)
P_HUMAN P protein (Melanocyte-specific transporter protein) (Pink-eyed diluti	0.00703727	10.0739	92790.2	90110050	2 (0 1 0 0 1)
ubiquitin specific protease 18 [Homo sapiens]	0.00078076	10.0736	42982.5	32313610	1 (1 0 0 0 0)
S38395 T-cell receptor beta chain precursor - human (fragment)	0.00235933	10.0735	15682.8	481253	1 (1 0 0 0 0)
GLP1 [Homo sapiens]	0.0061232	10.0734	100953	14211561	1 (1 0 0 0 0)
LIM domains containing 1 [Homo sapiens]	0.00291676	10.073	72144	7657307	1 (1 0 0 0 0)
envelope protein [Human endogenous retrovirus K] [MAS	0.000196698	10.0727	23183.8	3150441	2 (1 1 0 0 0)
FBXL11 protein [Homo sapiens]	0.00329554	10.0717	89889.6	71297126	1 (1 0 0 0 0)
envelope glycoprotein [Human immunodeficiency virus 1]	0.00883368	10.0712	97228.9	30314753	5 (1 2 0 2 0)
group IVB cytosolic phospholipase A2 beta splice variant 2 [Homo sapien	0.00123562	10.0711	100460	100215613	1 (1 0 0 0 0)
adaptor protein complex AP-2, mu1 [Mus musculus]	0.00276539	10.0707	49623.1	6753074	1 (1 0 0 0 0)
human epididymal protein 2 [Homo sapiens]	0.00846532	10.0705	12668.3	46250521	1 (1 0 0 0 0)
immunoglobulin heavy chain variable region [Homo sapiens]	0.0069229	10.0705	14893.5	27753165	4 (1 1 2 0 0)
solute carrier family 6 (neurotransmitter transporter, creatine), membe	0.0086734	10.0698	70475.8	5032097	1 (1 0 0 0 0)
immunoglobulin heavy chain VHDJ region [Homo sapiens]	0.00148193	10.0697	13258.3	21670203	1 (1 0 0 0 0)
single-strand-selective monofunctional uracil-DNA glycosylase 1 [Homo s	0.00394052	10.0687	29842.4	7657597	3 (0 0 2 1 0)
gp120 protein [Human immunodeficiency virus 1] [MA	0.00261497	10.0685	23364.7	34786182	1 (1 0 0 0 0)
PLST_HUMAN Plastin-3 (T-plastin)	0.00221765	10.0679	70391.2	2506254	2 (0 0 1 1 0)
immunoglobulin G fragment Fab New heavy chain, IgG1 [human, Peptide Partia	0.00191117	10.0676	23331.3	260394	1 (1 0 0 0 0)
capsid maturation protease [Human herpesvirus 3]	0.00816674	10.0673	66005.1	9625908	2 (0 0 1 1 0)
hCG1791816 [Homo sapiens]	0.00755379	10.0672	14695.3	119578561	1 (1 0 0 0 0)
alpha 1 type VII collagen precursor variant [Homo sapiens]	0.00379168	10.067	96748.8	62088870	1 (1 0 0 0 0)
envelope polyprotein [Human immunodeficiency virus 2]	0.00405633	10.0663	100015	732726	1 (1 0 0 0 0)
hCG2038810 [Homo sapiens]	0.00915324	10.0663	13095.7	119567845	3 (1 1 0 1 0)
unnamed protein product [Homo sapiens]	0.00301964	10.0661	23632	7022504	1 (1 0 0 0 0)
immunoglobulin IgM heavy chain variable region [Homo sapiens]	0.00101696	10.0654	10637.2	6606159	1 (1 0 0 0 0)
KIAA1249 protein [Homo sapiens]	0.00535997	10.0654	105068	6330854	1 (1 0 0 0 0)
AF182000_2 Tas [Human spumaretrovirus]	0.000629775	10.0652	33175	6003543	1 (1 0 0 0 0)
A Chain A, Crystal Structure Of Human G[alpha]i1 Bound To The Goloco Motif Of	0.00381767	10.0651	37087.7	21465862	1 (1 0 0 0 0)
phospholipid hydroperoxide glutathione peroxidase [Homo sapiens]	3.26606e-05	10.0651	22123.1	825667	1 (1 0 0 0 0)
protein tyrosine phosphatase 4a2 [Mus musculus]	0.00015501	10.0649	19114.8	6679545	1 (1 0 0 0 0)
reverse transcriptase [Human immunodeficiency virus 1]	0.0013816	10.0644	34633.2	55705714	1 (1 0 0 0 0)
DLP1_HUMAN Decaprenyl-diphosphate synthase subunit 2 (Decaprenyl pyrophosphat	0.00885099	10.0643	44100.7	73620006	1 (1 0 0 0 0)
PREDICTED: hypothetical protein [Homo sapiens]	0.0016019	10.0632	34880.3	113411757	1 (1 0 0 0 0)
transmembrane protein 185A [Homo sapiens]	0.00337824	10.0625	40619.5	22296884	1 (1 0 0 0 0)
calcium/calmodulin-dependent protein kinase IG [Homo sapiens]	8.21733e-06	10.0622	27823.5	56202635	1 (1 0 0 0 0)
calreticulin=calcium binding protein [human, placenta, Peptide Partial, 98	2.5751e-05	10.062	11087.4	913156	1 (1 0 0 0 0)
hypothetical protein LOC339145 [Homo sapiens]	0.00631638	10.0616	34762.8	38348294	2 (0 1 0 0 1)
US26 [Human herpesvirus 5 strain AD169]	0.00609276	10.0612	69975.8	9625862	1 (1 0 0 0 0)
Y chromosome chromodomain protein 1, telomeric isoform a [Homo sapiens	0.00794285	10.061	60435.1	25453481	1 (1 0 0 0 0)
eukaryotic translation initiation factor 4A isoform 1 [Homo sapiens]	0.0057027	10.0608	46124.6	4503529	1 (1 0 0 0 0)
reverse transcriptase [Human immunodeficiency virus 1]	0.00411758	10.0603	34591.4	55706914	1 (1 0 0 0 0)
AF202637_1 PP3111 [Homo sapiens]	0.00948611	10.06	16770.4	10732650	1 (1 0 0 0 0)
U4 [Human herpesvirus 7]	0.00626506	10.0586	62989.9	51874230	1 (1 0 0 0 0)
glycoprotein [Human metapneumovirus]	0.00038396	10.0579	24270.1	33243422	1 (1 0 0 0 0)
fusion, derived from t(12;16) malignant liposarcoma (human), isoform CR	0.00226466	10.0579	21186.9	148685671	1 (1 0 0 0 0)
PREDICTED: thyroid stimulating hormone receptor isoform 4 [Pan troglod	0.000420966	10.0577	28339.6	55641137	1 (1 0 0 0 0)
unnamed protein product [Homo sapiens]	0.00985884	10.0574	15645.6	34536215	1 (1 0 0 0 0)
KIAA1653 protein [Homo sapiens]	0.00636482	10.0574	21943.7	13359179	1 (1 0 0 0 0)
cadherin [Homo sapiens]	0.00296248	10.0572	14996.5	2281027	1 (1 0 0 0 0)
hCG2024326, isoform CRA_d [Homo sapiens]	0.00229476	10.057	14421	119574564	1 (1 0 0 0 0)
coronin, actin binding protein, 1A [Homo sapiens]	0.00217578	10.0566	50993.9	5902134	1 (1 0 0 0 0)
envelope glycoprotein [Human immunodeficiency virus 1]	0.00585909	10.0565	8068.27	28629401	1 (1 0 0 0 0)
gp120 protein [Human immunodeficiency virus 1] [MA	0.00234604	10.0563	22778.4	34786638	1 (1 0 0 0 0)
NCAP_PI3H4 Nucleoprotein (Protein N) (Nucleocapsid protein) (NP protein)	0.00460913	10.056	57791.1	127913	1 (1 0 0 0 0)
hCG2043519 [Homo sapiens]	0.00448982	10.056	30014.1	119628824	1 (1 0 0 0 0)
C18orf21 protein [Homo sapiens]	0.00684575	10.0557	25222.3	76097859	1 (1 0 0 0 0)
gag protein [Human immunodeficiency virus 1]	0.00625189	10.0554	25595	7416342	2 (0 0 1 1 0)
gag protein [Human immunodeficiency virus 1]	0.00625189	10.0554	25567	67984037	2 (0 1 0 0 1)
human type XVIII collagen [Homo sapiens]	0.00171972	10.055	153923	7717447	1 (1 0 0 0 0)
protein tyrosine phosphatase, receptor type, C isoform 1 precursor [Ho	0.00559331	10.0544	147161	18641347	2 (0 1 0 0 1)
unnamed protein product [Homo sapiens]	0.00504323	10.0542	26242.8	10437135	1 (1 0 0 0 0)
hCG2036928, isoform CRA_b [Homo sapiens]	0.00520946	10.0535	11252.8	119629008	1 (1 0 0 0 0)
K1 glycoprotein [Human herpesvirus 8]	0.00319935	10.0533	8239.99	52631373	2 (1 0 0 1 0)
potassium channel tetramerisation domain containing 4 [Homo sapiens]	0.00636856	10.0532	29948.4	146198864	1 (1 0 0 0 0)
integrin, beta 8 precursor [Homo sapiens]	0.00662728	10.0528	85575.4	4504779	3 (0 1 0 0 2)
WNT5A_HUMAN Protein Wnt-5a precursor	0.0032532	10.0521	40859.5	731157	1 (1 0 0 0 0)
envelope glycoprotein gp120 [Human immunodeficiency virus 1]	0.00442082	10.0519	22548.3	85663459	1 (1 0 0 0 0)
nuclear protein in testis [Homo sapiens]	0.0027617	10.0506	120256	50233787	3 (1 0 1 0 1)
A Chain A, Up1, The Two Rna-Recognition Motif Domain Of Hnrnp A1	0.00692035	10.0506	22249.2	20664272	1 (1 0 0 0 0)
G0/G1switch 2 [Homo sapiens]	0.00024046	10.0499	11314.1	7657104	1 (1 0 0 0 0)
envelope glycoprotein [Human immunodeficiency virus 1]	0.00496011	10.0496	96261.6	89477248	1 (1 0 0 0 0)
ribosomal protein L7 [Homo sapiens]	0.000726748	10.0493	29164.2	35903	1 (1 0 0 0 0)
nef protein [Human immunodeficiency virus 1]	0.000794215	10.0489	23609.6	73913802	1 (1 0 0 0 0)
hypothetical protein [Homo sapiens]	0.00566306	10.0482	68590	31874050	1 (1 0 0 0 0)
hCG2045868 [Homo sapiens]	0.00187489	10.0468	6263.96	119632186	1 (1 0 0 0 0)
WD repeat domain 44 protein [Homo sapiens]	0.00985333	10.0467	101304	45238858	1 (1 0 0 0 0)
FAM62C protein [Homo sapiens]	0.00751683	10.0465	57496.2	22713412	1 (1 0 0 0 0)
reverse transcriptase [Human immunodeficiency virus 1]	0.0091498	10.0463	30666.1	21435283	1 (1 0 0 0 0)
unnamed protein product [Homo sapiens]	0.00241047	10.0463	105922	7019889	2 (0 0 1 1 0)
unnamed protein product [Homo sapiens]	0.000503215	10.0454	52980.4	10439505	1 (1 0 0 0 0)
NmrA-like protein [Dictyostelium discoideum AX4]	0.00991678	10.0453	32616.5	66823091	1 (1 0 0 0 0)
envelope glycoprotein V2 region [Human immunodeficiency virus type 1] [MA	0.00639026	10.0451	5253.46	6690805	1 (1 0 0 0 0)
MOBP [Homo sapiens]	0.00096702	10.0446	20956	1408050	1 (1 0 0 0 0)
Putative protein of unknown function with similarity to human PEX5Rp (p	0.00272658	10.0445	59027.7	6323660	1 (1 0 0 0 0)
envelope glycoprotein [Human immunodeficiency virus 1]	0.00584203	10.0424	3979.99	33411168	2 (1 0 0 0 1)
HDAC5_HUMAN Histone deacetylase 5 (HD5) (Antigen NY-CO-9)	0.0026549	10.0423	121916	10720027	1 (1 0 0 0 0)
AF119917_46 PRO2521 [Homo sapiens]	0.00310874	10.0405	45007.3	7770205	1 (1 0 0 0 0)
hypothetical protein LOC79919 isoform 1 [Homo sapiens]	0.0050893	10.0397	49533.9	146198549	1 (1 0 0 0 0)
truncated pol protein [Human immunodeficiency virus 1]	0.00710467	10.0376	88014.9	87116002	1 (1 0 0 0 0)
Dynamin 1 [Homo sapiens]	0.00182249	8.16117	96000.3	71052112	1 (0 1 0 0 0)
envelope glycoprotein [Human immunodeficiency virus 1]	0.00714951	8.15541	9311.87	38018627	1 (0 1 0 0 0)
S31503 H+/K+-exchanging ATPase (EC 3.6.3.10) ATP1AL1 - human (fragment)	0.00310176	8.14997	10485.2	346261	1 (0 1 0 0 0)
VP-1 capsid protein [Human poliovirus 1]	0.00304608	8.14437	10539.1	12231217	3 (0 3 0 0 0)
WMBEHQ UL5 protein - human herpesvirus 2 (strain HG52) (fragment)	0.00211933	8.13969	88093.8	74001	2 (0 2 0 0 0)
Na,K-ATPase catalytic subunit alpha-A protein [Homo sapiens]	0.000110088	8.13706	3563.7	5919228	2 (0 2 0 0 0)
LATS homolog 1 [Homo sapiens]	0.00634468	8.12681	126790	4758666	2 (1 1 0 0 0)
actin-like protein [Homo sapiens]	1.02057e-06	8.11898	11602.9	62421077	3 (0 3 0 0 0)
oleoyl-ACP hydrolase isoform 2 [Homo sapiens]	0.00385895	8.1112	29911.9	89257335	1 (0 1 0 0 0)
unnamed protein product [Homo sapiens]	0.00574707	8.10706	129329	37138	2 (0 0 0 2 0)
unnamed protein product [Homo sapiens]	0.00491278	8.10702	59594.1	22760140	1 (0 1 0 0 0)
ubiquitin and ribosomal protein L40 precursor [Homo sapiens]	0.00456238	8.10701	14719	4507761	1 (0 1 0 0 0)
envelope glycoprotein [Human immunodeficiency virus 1]	0.000906259	8.10698	97586.1	86560181	3 (0 2 1 0 0)
protocadherin beta 4 precursor [Homo sapiens]	0.00578485	8.10624	87216.5	9256616	6 (0 0 4 1 1)
AF484489_7 envelope glycoprotein [Human immunodeficiency virus 1]	0.00268822	8.10537	96055.3	25166747	5 (0 0 0 3 2)
hair type II basic keratin [Homo sapiens]	0.00558223	8.10423	47004.2	1181996	1 (0 1 0 0 0)
envelope glycoprotein [Human immunodeficiency virus 1]	0.00705216	8.10091	12560.8	87246677	1 (0 1 0 0 0)
orf [Homo sapiens]	0.00606007	8.10066	53903.2	804996	3 (0 2 1 0 0)
AF119819_8 env polyprotein [Human immunodeficiency virus type 1]	0.00305827	8.10003	97306.2	5059048	1 (0 1 0 0 0)
KIAA0822 protein [Homo sapiens]	0.00606184	8.09806	180368	40788374	2 (0 0 1 0 1)
protease [Human immunodeficiency virus 1]	0.00464984	8.09796	10708.9	63015070	7 (4 2 0 1 0)
chromosome 10 open reading frame 90, isoform CRA_a [Homo sapiens]	0.00865858	8.0979	73622.7	119569585	1 (0 1 0 0 0)
AF512538_3 fusion glycoprotein [Human respiratory syncytial virus]	0.00339949	8.09727	63319	21263086	2 (0 2 0 0 0)
PREDICTED: similar to laminin receptor 1 (ribosomal protein SA) [Homo	0.000130109	8.09642	19348.8	88942763	1 (0 1 0 0 0)
ameloblastin precursor [Homo sapiens]	0.00169154	8.0933	48251.7	7706067	2 (0 0 1 0 1)
reverse transcriptase [Human immunodeficiency virus type 1]	0.00976712	8.09303	11392.8	4808783	1 (0 1 0 0 0)
pol protein [Human immunodeficiency virus 1]	0.00674779	8.09042	56964.4	42717248	2 (0 1 0 1 0)
envelope glycoprotein [Human immunodeficiency virus 1]	0.00539047	8.08977	96908.7	37682547	7 (0 0 2 4 1)
BCR/ABL chimeric fusion peptide [Homo sapiens] [MAS	0.00216388	8.08948	34571.4	4033557	2 (0 0 1 0 1)
annexin I [Homo sapiens]	0.00325273	8.08924	38690	4502101	2 (0 0 1 0 1)
X Chain X, Crystal Structure Of B. Anthracis Protective Antigen Complexed With	0.00079093	8.08553	82623.9	51247574	2 (0 1 1 0 0)
pol protein [Human immunodeficiency virus 1]	0.0061439	8.08543	55348.3	14537704	1 (0 1 0 0 0)
S34775 nicotinic acetylcholine receptor epsilon chain precursor - human	0.00545442	8.08301	54581.4	479584	1 (0 1 0 0 0)
neuroblastoma apoptosis-related protease [Homo sapiens]	0.000334513	8.08228	83583.4	68032982	2 (0 0 1 0 1)
ADP-ribosylation factor GTPase activating protein 1 isoform a variant [	0.00317291	8.08089	44641.2	62898415	2 (0 1 1 0 0)
envelope glycoprotein [Human immunodeficiency virus 1]	0.00487168	8.08032	12976.8	148788542	2 (0 1 0 1 0)
immunoglobulin mu heavy chain [Homo sapiens]	0.00693479	8.07987	19559.5	54780402	1 (0 1 0 0 0)
parkin isoform 3 [Homo sapiens]	0.00380528	8.07936	35616.9	7669540	6 (0 2 1 2 1)
OTTHUMP00000017301 [Homo sapiens]	0.00796381	8.07884	24160.2	57208690	1 (0 1 0 0 0)
envelope glycoprotein [Human immunodeficiency virus 1]	0.00762575	8.07875	13010.6	48728023	1 (0 1 0 0 0)
AF383235_1 envelope glycoprotein [Human immunodeficiency virus type 1] [M	0.000861539	8.07858	99275.6	19773751	3 (2 1 0 0 0)
immunoglobulin heavy chain variable region [Homo sapiens]	0.00334475	8.07834	10855.2	112700376	2 (0 1 0 1 0)
E6 protein [Human papillomavirus type 95]	0.00306408	8.07831	16332.1	40804521	1 (0 1 0 0 0)
unnamed protein product [Homo sapiens]	0.000100186	8.07809	27528.8	10436240	4 (1 2 1 0 0)
PREDICTED: hypothetical protein isoform 2 [Pan troglodytes]	0.00239739	8.0775	10614.5	55660998	1 (0 1 0 0 0)
pol protein [Human immunodeficiency virus type 1] [M	0.00958519	8.07728	37437.9	9938223	2 (0 1 1 0 0)
myozenin 1 [Homo sapiens]	0.00365669	8.07724	31724.8	10864053	1 (0 1 0 0 0)
calsyntenin 2 [Homo sapiens]	0.00397769	8.07711	106952	11545861	3 (0 0 0 3 0)
CBPA6_HUMAN Carboxypeptidase A6 precursor (Carboxypeptidase B)	0.000331875	8.07671	50974.9	85683250	1 (0 1 0 0 0)
cytochrome P450, family 3, subfamily A, polypeptide 43 isoform 2 [Homo	0.00111264	8.07648	57632.3	16933533	1 (0 1 0 0 0)
envelope glycoprotein [Human immunodeficiency virus type 1]	0.00624844	8.07633	14086.1	4091225	2 (0 1 0 1 0)
pol protein [Human immunodeficiency virus type 1] [	0.00424597	8.07567	8059.34	13604462	1 (0 1 0 0 0)
p17 protein [Human immunodeficiency virus type 1] [M	0.00580506	8.07551	14395.4	6003152	1 (0 1 0 0 0)
actin-like 6A isoform 1 [Homo sapiens]	0.00114014	8.07504	47430.4	4757718	1 (0 1 0 0 0)
mortality factor 4 [Homo sapiens]	0.00161116	8.07444	26715.8	6996928	1 (0 1 0 0 0)
exterior membrane protein gp120 [Human immunodeficiency virus 1]	0.000313693	8.07378	37826.9	7258436	3 (0 1 1 0 1)
prostate tumor overexpressed gene 1, isoform CRA_j [Homo sapiens]	0.0040032	8.07326	52402.7	119572946	1 (0 1 0 0 0)
envelope glycoprotein [Human immunodeficiency virus 1]	0.000111692	8.07311	96698.8	26518644	1 (0 1 0 0 0)
TRIO and F-actin binding protein, isoform CRA_e [Homo sapiens]	0.000160075	8.07223	135204	119580589	1 (0 1 0 0 0)
atonal homolog 1 [Homo sapiens]	0.00750802	8.07113	38137	4885075	2 (0 0 0 2 0)
PREDICTED: similar to zinc finger protein 251 [Homo sapiens]	0.00183869	8.07083	87345.5	113420568	1 (0 1 0 0 0)
ribosomal protein L24, isoform CRA_e [Homo sapiens]	0.0091961	8.07075	17531.5	119600190	1 (0 1 0 0 0)
immunoglobulin heavy chain variable region [Homo sapiens]	0.00111265	8.06903	13291.5	118406051	1 (0 1 0 0 0)
hCG2038794 [Homo sapiens]	0.00409872	8.06884	11916.1	119628605	1 (0 1 0 0 0)
immunoglobulin kappa light chain variable region [Homo sapiens]	0.000846244	8.06843	11170.6	4378292	3 (1 2 0 0 0)
Na+/K+ -ATPase beta 1 subunit isoform b [Homo sapiens]	0.0096859	8.06768	34870.8	49574489	1 (0 1 0 0 0)
AF286232_8 envelope glycoprotein [Human immunodeficiency virus type 1] [M	0.0046468	8.06753	97469.2	13569305	1 (0 1 0 0 0)
GPRA isoform D [Homo sapiens]	0.000516713	8.06751	18031.1	34596872	1 (0 1 0 0 0)
hCG2007637, isoform CRA_a [Homo sapiens]	0.00439476	8.06639	34125.9	119629769	3 (0 2 1 0 0)
PREDICTED: hypothetical protein [Homo sapiens]	0.000954009	8.06586	89772.7	113418828	1 (0 1 0 0 0)
serine peptidase inhibitor, Kunitz type 1 isoform 1 precursor [Homo sa	0.00891434	8.06566	58360.3	32313599	1 (0 1 0 0 0)
syntaxin 3A, isoform CRA_b [Homo sapiens]	1.40646e-06	8.06533	31998.5	119594260	1 (0 1 0 0 0)
pol protein [Human immunodeficiency virus 1]	0.0013816	8.06439	45433.2	55735866	1 (0 1 0 0 0)
ribosomal protein L35a pseudogene 3 [Homo sapiens]	0.00654905	8.06401	10713.5	55959580	1 (0 1 0 0 0)
gp120 [Human immunodeficiency virus type 1]	0.00183567	8.06287	7260.74	3598946	1 (0 1 0 0 0)
zinc finger protein 652 [Homo sapiens]	0.000840571	8.06236	69699.5	7662384	1 (0 1 0 0 0)
unnamed protein product [Homo sapiens]	0.00571182	8.06218	81814.9	14041957	1 (0 1 0 0 0)
immunoglobulin heavy chain [Homo sapiens]	0.00790832	8.062	9159.43	3986318	1 (0 1 0 0 0)
capsid protein VP1 [Human poliovirus 1]	0.00694809	8.06116	33444.8	7008422	1 (0 1 0 0 0)
Hypothetical protein LOC283932 [Homo sapiens]	0.00045411	8.06072	13211.5	76780281	1 (0 1 0 0 0)
unnamed protein product [Homo sapiens]	0.00901759	8.06046	15840	21756795	1 (0 1 0 0 0)
RYNR_HUMAN [AA 4362- 5032]; SKELETAL MUSCLE CALCIUM RELEASE CHANNEL [Homo	0.00234279	8.06008	104127	3845349	1 (0 1 0 0 0)
adaptor-related protein complex 2, alpha 2 subunit variant [Homo sapien	0.0053487	8.05969	15439.2	62088424	1 (0 1 0 0 0)
pol protein [Human immunodeficiency virus 1]	0.00723925	8.05925	49203.5	57547438	2 (0 0 1 0 1)
immunoglobulin heavy chain VHDJ region [Homo sapiens]	0.00227784	8.05857	13057.3	21668636	1 (0 1 0 0 0)
unnamed protein product [Homo sapiens]	0.00464248	8.0584	25215.2	28193116	1 (0 1 0 0 0)
homologue to a human gene expressed in the nervous system; bp 510-533: put	0.00247363	8.05837	75079.7	556329	1 (0 1 0 0 0)
PSB5_HUMAN Proteasome subunit beta type 5 precursor (Proteasome epsilon chain)	0.00298375	8.05786	22882.3	1172607	1 (0 1 0 0 0)
PREDICTED: hypothetical protein [Homo sapiens]	0.00779275	8.05629	25535.5	89029939	2 (0 0 1 0 1)
NT6G_HUMAN Putative neurotrophin-6 gamma (NT-6 gamma)	0.00620588	8.05625	19540.8	462745	1 (0 1 0 0 0)
hypothetical protein [Homo sapiens]	0.000631205	8.05561	71947	21740071	3 (0 0 0 1 2)
envelope glycoprotein [Human immunodeficiency virus 1]	0.00685657	8.05424	98884.4	37702613	1 (0 1 0 0 0)
hCG1653855 [Homo sapiens]	0.00918427	8.05326	4986.54	119598864	1 (0 1 0 0 0)
toll-like receptor 9 isoform A precursor [Homo sapiens]	0.00883005	8.05274	115786	8394456	1 (0 1 0 0 0)
hypothetical protein [Homo sapiens]	0.0075513	8.05259	35740.7	34365184	1 (0 1 0 0 0)
dopey family member 1 [Homo sapiens]	0.00838743	8.05224	266392	55957343	1 (0 1 0 0 0)
ADORA3 protein [Homo sapiens]	0.00854387	8.05159	23823.2	34783487	1 (0 1 0 0 0)
envelope glycoprotein gp105 [Human immunodeficiency virus 2]	0.00611555	8.05073	12665.5	8671152	1 (0 1 0 0 0)
immunoglobulin heavy chain variable region [Homo sapiens]	0.00856047	8.05051	8696.46	70798057	1 (0 1 0 0 0)
L3 23 kDa protease [Human adenovirus type 7]	0.00113943	8.04985	23686.5	51173319	1 (0 1 0 0 0)
envelope glycoprotein [Human immunodeficiency virus 1]	0.00200096	8.04824	97723.8	38491720	1 (0 1 0 0 0)
T-cell receptor V delta 1 [Homo sapiens]	0.00662711	8.047	6774.61	14485049	1 (0 1 0 0 0)
TRAF2 and NCK interacting kinase [Homo sapiens]	0.00108926	8.04688	154847	55741807	2 (0 0 0 2 0)
envelope glycoprotein [Human immunodeficiency virus 1]	0.00959903	8.04686	12124.6	30843469	1 (0 1 0 0 0)
unnamed protein product [Homo sapiens]	0.00445117	8.04598	46339	21758612	1 (0 1 0 0 0)
envelope glycoprotein [Human immunodeficiency virus type 1]	0.00904901	8.04577	46540.9	6468027	1 (0 1 0 0 0)
AF139987_3 Wbscr1 alternative spliced product [Mus musculus]	0.00448247	8.04541	25170.5	4972951	1 (0 1 0 0 0)
HEAT repeat containing 4 [Homo sapiens]	0.00338524	8.04417	111807	42558270	2 (0 0 1 0 1)
actin-related protein T1 [Homo sapiens]	0.00323586	8.04376	41669.2	19923076	2 (0 0 0 2 0)
FLJ00227 protein [Homo sapiens]	0.00967301	8.04315	20762.9	18676656	1 (0 1 0 0 0)
unknown [Homo sapiens]	0.00663306	8.04196	268827	63990112	1 (0 1 0 0 0)
envelope glycoprotein [Human immunodeficiency virus 1]	0.00128291	8.04176	11210	55846258	1 (0 1 0 0 0)
I-kappa-B-related protein [Homo sapiens]	0.00294469	8.04176	132744	34304358	1 (0 1 0 0 0)
unnamed protein product [Homo sapiens]	0.00448606	8.03728	17661.3	34530655	1 (0 1 0 0 0)
programmed cell death 10 [Homo sapiens]	0.0063785	6.20574	24685.8	20127517	6 (1 2 3 0 0)
hypothetical protein [Human calicivirus Hu/NLV/Queen's Arms/Leeds/92/UK	0.000480465	6.16495	22089.1	14330431	12 (5 3 1 2 1)
upstream binding transcription factor, RNA polymerase I [Homo sapiens]	0.00324313	6.13069	18636.5	13397837	11 (0 3 3 3 2)
protease [Human immunodeficiency virus 1]	0.00405951	6.10361	10593.8	38350806	2 (0 1 1 0 0)
tubulin, alpha-like 3 [Homo sapiens]	0.00046443	6.10249	49875.8	119606853	14 (4 5 2 3 0)
unnamed protein product [Homo sapiens]	0.0046576	6.09762	136312	34532160	2 (0 1 1 0 0)
heat shock protein 90Bf [Homo sapiens]	0.00242132	6.08883	41434.2	61104919	2 (0 0 0 1 1)
envelope glycoprotein [Human immunodeficiency virus 1]	0.00487168	6.08012	9623.04	145342622	2 (0 1 1 0 0)
gp160 [Human immunodeficiency virus 1]	0.0031351	6.07852	32937.2	1668728	4 (0 1 1 1 1)
KIAA1374 protein [Homo sapiens]	0.000417308	6.06222	86390.6	7243129	2 (0 0 0 1 1)
PREDICTED: hypothetical protein [Homo sapiens] [MA	0.00360229	6.05675	46992.4	89033825	2 (1 0 1 0 0)
hCG1642903, isoform CRA_b [Homo sapiens]	0.00256964	6.0565	12072	119630702	2 (0 0 0 1 1)
hypothetical protein [Homo sapiens]	0.00320477	6.05349	84707.9	31874763	2 (0 0 0 1 1)
PREDICTED: similar to Collagen alpha-1(X) chain precursor [Homo sa	0.00988695	6.04835	26964.7	113429587	2 (0 0 0 1 1)
immunoglobulin mu heavy chain [Homo sapiens]	0.00443217	4.1462	13314.6	54779543	2 (0 1 0 1 0)
AACS protein [Homo sapiens]	0.000439111	4.12319	45607.8	71297231	12 (0 7 0 2 3)
unnamed protein product [Homo sapiens]	0.000422316	4.1131	60673.3	10433842	6 (3 0 1 2 0)
phosphoinositide-3-kinase, class 2, beta polypeptide [Homo sapiens] [MA	0.000960042	4.0719	18762.2	55962145	2 (0 1 0 1 0)
AF470976_1 pol polyprotein [Human immunodeficiency virus type 1]	3.11174e-05	2.14568	41160.8	21686054	15 (1 6 2 3 3)
pol protein [Human immunodeficiency virus 1]	0.000439973	2.13943	56979.6	42717134	13 (0 5 2 2 4)
R-spondin family, member 4 isoform 2 precursor [Homo sapiens]	0.000178545	2.10689	19593.9	90970328	2 (1 0 0 0 1)
HSF1 protein [Homo sapiens]	0.0054595	2.0794	21684.5	76779260	2 (1 0 0 0 1)
tubulin, beta 1 [Mus musculus]	0.00318215	2.07229	50408.6	124430500	6 (0 1 3 1 1)
KIAA1163 protein [Homo sapiens]	0.0076059	2.06737	49174.7	6330167	2 (0 1 0 0 1)

## Sheet: CADASIL_4_UT
Description	P-value	Score	MW	Accession	Peptide (Hits)
glyceraldehyde-3-phosphate dehydrogenase [Homo sapiens]	1e-30	40.3108	36030.4	7669492	28 (26 0 2 0 0)
neurofilament, medium polypeptide 150kDa [Homo sapiens]	2.37093e-14	230.288	102386	4885513	33 (28 2 1 2 0)
I38369 beta-tubulin - human (fragment)	8.24896e-13	282.296	48848.5	2119276	159 (131 13 9 4 2)
unknown [Homo sapiens]	2.86764e-12	116.242	268547	62988842	17 (9 2 1 2 3)
neurofilament, light polypeptide 68kDa [Homo sapiens]	4.75692e-12	192.207	61479.3	105990539	34 (25 8 1 0 0)
limbic system-associated membrane protein [Homo sapiens]	6.54476e-12	50.2729	37370.2	45594240	5 (5 0 0 0 0)
unnamed protein product [Homo sapiens]	7.57885e-12	56.2028	35738.8	32486	9 (5 3 0 0 1)
A40671 dynamin, internal form 1, long C-terminal form - human [M	9.82561e-12	134.317	97201	539580	24 (17 2 1 2 2)
synaptosomal-associated protein 25 isoform SNAP25A [Homo sapiens]	1.63077e-11	48.2308	23321.2	18765733	9 (7 0 1 0 1)
glial fibrillary acidic protein [Homo sapiens]	2.13764e-11	416.251	49849.7	4503979	80 (69 3 5 0 3)
tubulin, beta 4 [Homo sapiens]	3.36653e-11	154.246	49553.9	21361322	120 (95 21 1 2 1)
calcium/calmodulin-dependent protein kinase II delta isoform 1 [Homo s	3.51785e-11	38.1513	54093.6	26667183	6 (5 1 0 0 0)
tubulin, beta, 4 [Homo sapiens]	4.00979e-11	114.245	50400.3	50592996	48 (26 15 5 2 0)
aquaporin 4 isoform a [Homo sapiens]	4.94471e-11	10.2546	34806.9	4502181	1 (1 0 0 0 0)
KIAA1878 protein [Homo sapiens]	6.46916e-11	12.1778	48892	14017973	2 (1 0 0 0 1)
S68466 translation elongation factor EF-Tu-like protein P43 precursor, mitochondria	6.68992e-11	72.2032	49502.2	7443384	9 (5 2 0 1 1)
contactin 1 isoform 1 precursor [Homo sapiens]	8.44402e-11	96.2126	113249	28373117	10 (9 0 1 0 0)
2',3'-cyclic-nucleotide 3'-phosphodiesterase (EC 3.1.4.37)	9.46761e-11	262.287	45070.4	180687	70 (67 0 2 0 1)
tubulin, beta, 2 [Homo sapiens]	1.34471e-10	28.2354	49799	5174735	19 (5 10 4 0 0)
UBX domain containing 1 [Homo sapiens]	1.4388e-10	22.1778	49723	13376854	7 (1 2 0 3 1)
histone H2B [Homo sapiens]	1.58035e-10	74.2342	13927.6	1568557	16 (9 6 0 1 0)
Na+/K+ -ATPase alpha 1 subunit isoform a proprotein [Homo sapiens]	1.65302e-10	66.2908	112824	21361181	7 (5 2 0 0 0)
KIAA0820 protein [Homo sapiens]	2.18968e-10	82.2234	99887.1	20521666	16 (6 4 2 2 2)
heterogeneous nuclear ribonucleoprotein A3 [Homo sapiens]	2.76162e-10	16.1625	39570.5	34740329	3 (2 0 1 0 0)
clathrin heavy chain 1 [Homo sapiens]	3.35753e-10	106.195	191492	4758012	12 (9 1 1 0 1)
GNAO2_HUMAN Guanine nucleotide-binding protein G(o) subunit alpha 2	3.8139e-10	102.253	40061.1	60416433	17 (14 1 0 1 1)
tubulin, alpha 1a [Mus musculus]	5.55695e-10	10.2353	49927.7	6678465	13 (13 0 0 0 0)
voltage-dependent anion channel 3 [Homo sapiens]	5.87679e-10	30.207	30639.3	25188179	4 (4 0 0 0 0)
VDAC2 [Homo sapiens]	6.22445e-10	86.2663	30393	48146045	13 (11 2 0 0 0)
CD9 antigen [Homo sapiens]	7.46725e-10	18.1682	25399	4502693	2 (1 1 0 0 0)
protein kinase C, gamma [Homo sapiens]	9.31073e-10	58.2079	78397.3	13384594	7 (6 1 0 0 0)
tubulin alpha 6 [Homo sapiens]	1.30622e-09	180.266	49863.5	14389309	103 (88 4 4 4 3)
heat shock 70kDa protein 2 [Homo sapiens]	1.47893e-09	22.1809	69978	13676857	3 (1 1 0 1 0)
calcium/calmodulin-dependent protein kinase IIB isoform 8 [Homo sapien	1.50305e-09	88.1957	50923	26051218	21 (11 5 1 3 1)
aconitase 2 precursor [Homo sapiens]	1.54764e-09	10.1755	85372	4501867	1 (1 0 0 0 0)
brain abundant, membrane attached signal protein 1 [Homo sapiens]	1.56926e-09	112.267	22680	30795231	20 (18 0 0 0 2)
3-oxoacid CoA transferase 1 precursor [Homo sapiens]	2.33131e-09	20.2144	56122	4557817	2 (2 0 0 0 0)
heat shock 90kDa protein 1, beta [Homo sapiens]	2.79734e-09	68.2194	83212.2	20149594	10 (5 3 0 0 2)
Na+,K+ ATPase [Homo sapiens]	3.76957e-09	92.2633	111901	1359715	13 (10 2 0 0 1)
tyrosine 3/tryptophan 5 -monooxygenase activation protein, epsilon poly	3.96726e-09	70.1924	29155.4	5803225	8 (7 0 0 1 0)
clusterin isoform 2 [Homo sapiens]	4.87786e-09	20.1864	52461.1	42740907	2 (2 0 0 0 0)
dihydropyrimidinase-like 2 [Homo sapiens]	5.92206e-09	64.2216	62254.7	4503377	14 (13 0 0 1 0)
Na+/K+ -ATPase alpha 2 subunit proprotein [Homo sapiens]	6.0685e-09	80.2006	112194	4502271	17 (13 1 1 1 1)
vesicle-associated membrane protein 2 (synaptobrevin 2) [Homo sapiens]	6.59727e-09	30.1901	12640.7	7657675	3 (3 0 0 0 0)
ubiquitin-activating enzyme E1 [Homo sapiens]	6.72569e-09	38.1756	117774	23510338	5 (3 0 1 0 1)
KIAA0325 protein [Homo sapiens]	7.41454e-09	132.23	533404	71891782	17 (8 4 1 3 1)
ubiquinol-cytochrome c reductase core protein II [Homo sapiens]	7.95595e-09	36.1551	48412.9	50592988	5 (2 0 2 1 0)
vacuolar H+ATPase B2 [Homo sapiens]	8.20176e-09	50.2167	56465	19913428	5 (5 0 0 0 0)
solute carrier family 25 (mitochondrial carrier; adenine nucleotide tr	8.83961e-09	58.2124	33043.2	55749577	8 (7 1 0 0 0)
microtubule-associated protein 1B isoform 1 [Homo sapiens]	8.98433e-09	74.1922	270452	5174525	11 (4 2 1 2 2)
KIAA0338 [Homo sapiens]	9.6352e-09	68.2031	103516	2224617	8 (5 1 1 1 0)
brain creatine kinase [Homo sapiens]	1.19259e-08	206.252	42617.4	21536286	59 (51 4 2 0 2)
unnamed protein product [Homo sapiens]	1.25043e-08	32.2304	49811	10433717	22 (6 5 11 0 0)
calnexin precursor [Homo sapiens]	1.2529e-08	24.1541	67526	10716563	3 (2 0 0 1 0)
guanine nucleotide binding protein, alpha activating polypeptide O [Ho	1.49302e-08	20.216	40024.9	10567816	3 (3 0 0 0 0)
N-ethylmaleimide-sensitive factor [Homo sapiens]	1.73885e-08	188.241	82602.2	11079228	25 (21 1 0 2 1)
internexin neuronal intermediate filament protein, alpha [Homo sapiens	1.83355e-08	122.19	55357.5	14249342	17 (14 2 0 1 0)
Nogo-A protein [Homo sapiens]	1.99732e-08	20.1298	129861	9408096	2 (2 0 0 0 0)
KIAA0968 protein [Homo sapiens]	2.19539e-08	126.227	58985.2	4589580	28 (22 3 2 0 1)
de-ubiquitinase [Homo sapiens]	2.31624e-08	20.1865	95683.4	1122278	4 (1 0 1 0 2)
heterogeneous nuclear ribonucleoprotein A2/B1 isoform A2 [Homo sapiens]	2.3927e-08	30.1945	35983.8	4504447	3 (3 0 0 0 0)
voltage-dependent anion channel 1 [Homo sapiens]	2.45724e-08	110.178	30753.6	4507879	16 (16 0 0 0 0)
tubulin, beta 5 [Mus musculus]	2.50198e-08	10.1629	49639	7106439	7 (6 1 0 0 0)
guanine nucleotide-binding protein, beta-2 subunit [Mus musculus]	2.97329e-08	56.1985	37307.1	13937391	8 (7 0 1 0 0)
EPB41L3 protein [Homo sapiens]	3.42527e-08	10.1166	96454.3	13544009	1 (1 0 0 0 0)
solute carrier family 25 member 3 isoform b precursor [Homo sapiens]	3.53423e-08	10.2337	39932.7	4505775	2 (2 0 0 0 0)
unnamed protein product [Homo sapiens]	3.66794e-08	16.2016	30591.7	14042447	3 (1 0 0 1 1)
beta actin [Homo sapiens]	3.7415e-08	20.1809	41709.7	4501885	5 (5 0 0 0 0)
A Chain A, Human Prion Protein	3.77596e-08	14.1749	22876.6	6730485	2 (1 0 0 1 0)
A Chain A, Crystal Structure Of A DictyosteliumTETRAHYMENA CHIMERA Actin (Mutan	4.01622e-08	118.19	41719.9	7245526	25 (18 5 2 0 0)
unnamed protein product [Homo sapiens]	4.20367e-08	10.1582	20025.1	37610	1 (1 0 0 0 0)
synaptosomal-associated protein, 25kDa [Homo sapiens]	4.59356e-08	20.1942	10676	24740601	2 (2 0 0 0 0)
Chain , Human Complement Regulatory Protein Cd59 (Extracellular Region, Resid	4.7211e-08	10.2063	8080.61	515118	3 (3 0 0 0 0)
B46091 H+-exporting ATPase (EC 3.6.3.6) chain A, vacuolar (VA68 type) - human	4.87773e-08	70.1515	68204.5	1082432	7 (7 0 0 0 0)
tubulin, alpha 4 [Mus musculus]	5.07808e-08	20.1338	49892.4	6678467	4 (4 0 0 0 0)
syntaxin binding protein 1 isoform a [Homo sapiens]	5.24621e-08	156.17	68692.3	4507297	22 (19 0 0 1 2)
hypothetical protein [Homo sapiens]	6.37628e-08	26.1831	22204.3	6624942	3 (2 0 1 0 0)
myelin basic protein isoform 1 [Homo sapiens]	6.42547e-08	94.187	21480	68509930	24 (18 2 0 1 3)
synaptotagmin I [Homo sapiens]	7.35077e-08	26.2606	47542.8	5032139	3 (2 0 1 0 0)
VPP1_HUMAN Vacuolar proton translocating ATPase 116 kDa subunit a isoform 1 (	7.66142e-08	72.1845	96350.3	59803038	9 (7 1 0 1 0)
tyrosine 3/tryptophan 5 -monooxygenase activation protein, zeta polypep	8.644e-08	50.2004	27727.7	4507953	10 (7 0 1 1 1)
neural cell adhesion molecule 1 isoform 3 [Homo sapiens]	9.02048e-08	30.1938	83718	115529478	3 (3 0 0 0 0)
Heterogeneous nuclear ribonucleoprotein C (C1/C2) [Homo sapiens]	9.12259e-08	20.2288	32373.9	14249959	3 (2 1 0 0 0)
KIAA0417 [Homo sapiens]	9.17667e-08	76.175	78381.4	2887409	10 (8 0 0 1 1)
unnamed protein product [Homo sapiens]	9.93265e-08	36.1528	54221.2	22760572	4 (2 2 0 0 0)
microtubule-associated protein 2 [Homo sapiens]	9.94863e-08	160.164	199045	1850617	22 (14 4 1 1 2)
DCLK1_HUMAN Serine/threonine-protein kinase DCLK1 (Doublecortin-like and CAM k	1.08438e-07	56.1693	82173	6225242	6 (5 0 1 0 0)
mysoin heavy chain 12 [Homo sapiens]	1.1181e-07	26.1974	215196	1770741	6 (1 1 1 1 2)
H2A histone family, member A [Homo sapiens]	1.254e-07	18.2066	14127	10645195	5 (3 1 1 0 0)
tubulin, beta 2 [Homo sapiens]	1.33116e-07	50.1838	49875	4507729	26 (22 4 0 0 0)
glucose phosphate isomerase [Homo sapiens]	1.62083e-07	30.1898	63107.3	18201905	3 (3 0 0 0 0)
CD59 antigen p18-20 [Homo sapiens]	1.63246e-07	20.2314	14167.8	10835165	2 (2 0 0 0 0)
KIAA0871 protein [Homo sapiens]	1.72456e-07	30.165	53143.4	40788966	3 (3 0 0 0 0)
lymphocyte antigen 6 complex, locus H [Homo sapiens]	1.92187e-07	14.1341	14659.1	4505051	3 (2 0 0 1 0)
tubulin, alpha 1B [Mus musculus]	1.99653e-07	70.2362	50119.6	34740335	33 (30 1 1 1 0)
tropomodulin 2 (neuronal) [Homo sapiens]	2.27629e-07	20.2079	39570.7	7657647	2 (2 0 0 0 0)
SYN2_HUMAN Synapsin-2 (Synapsin II)	2.61521e-07	70.2079	62928.8	6686022	8 (8 0 0 0 0)
adenylyl cyclase-associated protein 2 [Homo sapiens]	3.02355e-07	10.1534	52790.9	5453593	1 (1 0 0 0 0)
ATP synthase, H+ transporting, mitochondrial F1 complex, alpha subunit	3.06178e-07	162.22	59713.7	4757810	22 (16 1 1 1 3)
ubiquinol-cytochrome c reductase core protein I [Homo sapiens]	3.53666e-07	62.1899	52612.5	46593007	8 (4 2 0 1 1)
IMMT_HUMAN Mitochondrial inner membrane protein (Mitofilin) (p87/89) (Prolife	3.72872e-07	18.1167	83626.5	29427676	2 (1 1 0 0 0)
phosphofructokinase, platelet [Homo sapiens]	3.7661e-07	20.1868	85541.6	11321601	2 (2 0 0 0 0)
guanine nucleotide-binding protein, beta-1 subunit [Mus musculus]	4.21621e-07	40.1812	37353	6680045	5 (5 0 0 0 0)
KIAA0987 protein [Homo sapiens]	4.2558e-07	76.1667	123629	4589618	9 (6 1 1 0 1)
S38532 protein 14-3-3 eta chain - human	4.47452e-07	28.1675	28172	481365	3 (2 1 0 0 0)
alanyl-tRNA synthetase [Homo sapiens]	4.76438e-07	16.0944	106734	1015321	2 (1 0 1 0 0)
connexin 43 [Homo sapiens]	5.03217e-07	50.1525	42980.9	4504001	5 (5 0 0 0 0)
Thy-1 cell surface antigen [Homo sapiens]	5.42426e-07	10.1943	17923.3	19923362	3 (3 0 0 0 0)
ATPase, H+ transporting, lysosomal, V0 subunit d1 [Homo sapiens]	5.66362e-07	10.0945	40303.3	19913432	1 (1 0 0 0 0)
profilin 2 isoform a [Homo sapiens]	5.9214e-07	20.1639	15036.3	16753215	2 (2 0 0 0 0)
septin 8 isoform a [Homo sapiens]	6.72279e-07	10.1662	55721.1	149363689	1 (1 0 0 0 0)
unnamed protein product [Homo sapiens]	7.26911e-07	30.1898	57919.5	28940	5 (4 0 0 1 0)
cysteine and glycine-rich protein 1 [Homo sapiens]	7.51467e-07	10.2196	20553.8	4758086	1 (1 0 0 0 0)
SPTAN1 protein [Homo sapiens]	7.74255e-07	60.1248	282106	31565122	8 (4 1 1 1 1)
crystallin, alpha B [Homo sapiens]	7.75931e-07	86.1656	20146.4	4503057	13 (11 0 2 0 0)
histone cluster 1, H1a [Homo sapiens]	7.86421e-07	24.182	21828.9	4885373	5 (2 0 0 2 1)
AT2B4_HUMAN Plasma membrane calcium-transporting ATPase 4 (PMCA4) (Plasma mem	8.04928e-07	50.2098	137833	14286105	6 (4 0 1 1 0)
H4 histone family, member A [Homo sapiens]	8.94196e-07	66.1631	11360.4	4504301	15 (14 0 1 0 0)
TBB4Q_HUMAN Tubulin beta-4q chain	9.73899e-07	36.1708	48403.5	12643363	7 (2 3 1 1 0)
WD repeat-containing protein 1 isoform 1 [Homo sapiens]	9.84432e-07	42.1889	66151.9	9257257	5 (3 1 0 1 0)
unnamed protein product [Homo sapiens]	1.19434e-06	60.153	52406.5	21757045	8 (4 2 0 1 1)
tyrosine 3-monooxygenase/tryptophan 5-monooxygenase activation protein,	1.30396e-06	76.192	28284.9	9507245	12 (10 2 0 0 0)
ANK2_HUMAN Ankyrin-2 (Brain ankyrin) (Ankyrin-B) (Ankyrin, nonerythroid)	1.3881e-06	76.2046	430079	1703310	10 (3 4 1 2 0)
AT12A_HUMAN Potassium-transporting ATPase alpha chain 2 (Proton pump) (Non-ga	1.56507e-06	14.1608	115825	20141250	2 (1 0 0 1 0)
growth associated protein 43 [Homo sapiens]	1.74208e-06	24.1391	24787.9	4503911	4 (3 0 0 1 0)
neural cell adhesion molecule 1 isoform 1 [Homo sapiens]	1.94332e-06	16.1477	93302.6	94420689	2 (1 0 1 0 0)
excitatory amino acid transporter 2 [Homo sapiens]	3.10003e-06	10.1864	62063.9	40254478	1 (1 0 0 0 0)
AF139987_3 Wbscr1 alternative spliced product [Mus musculus]	3.41176e-06	10.0901	25170.5	4972951	1 (1 0 0 0 0)
DnaJ (Hsp40) homolog, subfamily B, member 2 isoform b [Homo sapiens]	3.6207e-06	10.1374	35558.4	27151736	1 (1 0 0 0 0)
heat shock 27kDa protein 1 [Homo sapiens]	3.78085e-06	40.2045	22768.5	4504517	4 (4 0 0 0 0)
ATPase, H+ transporting, lysosomal, V0 subunit c [Homo sapiens]	4.07832e-06	18.2309	15725.5	4502313	2 (1 1 0 0 0)
glutamate transporter [Homo sapiens]	4.26239e-06	40.1331	61664.6	488752	9 (3 2 2 1 1)
neurofilament-66; NF-66 [Homo sapiens]	4.636e-06	10.1921	54875.2	994844	2 (2 0 0 0 0)
phosphoglycerate mutase family 3 [Homo sapiens]	5.01175e-06	32.1277	28758.8	71274132	4 (2 1 0 1 0)
AMP-activated protein kinase alpha 2 catalytic subunit [Homo sapiens]	5.44533e-06	10.1534	62279.7	46877068	1 (1 0 0 0 0)
A Chain A, Crystal Structure Of Human P32, A Doughnut-Shaped Acidic Mitochondri	5.85402e-06	10.1695	23786.5	4930073	1 (1 0 0 0 0)
claudin 11 [Homo sapiens]	5.87277e-06	30.1648	21978.4	10938016	6 (6 0 0 0 0)
chaperonin [Homo sapiens]	6.04914e-06	80.1236	61016.5	31542947	9 (7 0 1 1 0)
MARCS_HUMAN Myristoylated alanine-rich C-kinase substrate (MARCKS) (Protein k	6.59283e-06	10.1394	31535.9	76803798	1 (1 0 0 0 0)
KIAA1087 protein [Homo sapiens]	6.75699e-06	10.1181	103374	5689511	1 (1 0 0 0 0)
hypothetical protein ( (L11645) alpha-tubulin [Homo sapiens] ) [Neuros	7.12072e-06	10.1624	10326.7	85091443	2 (2 0 0 0 0)
calcium/calmodulin dependent protein kinase II delta [Homo sapiens] [MAS	7.34002e-06	20.1281	27534.9	6688230	2 (2 0 0 0 0)
aldehyde dehydrogenase 5A1 precursor, isoform 2 [Homo sapiens]	8.27708e-06	30.1228	57178.4	4507229	3 (3 0 0 0 0)
heat shock protein 90Bb [Homo sapiens]	8.72166e-06	12.1663	49091.8	61104911	2 (1 0 0 0 1)
tenascin-R [Homo sapiens]	9.14598e-06	32.1489	149479	1617316	4 (2 1 0 1 0)
calcium/calmodulin-dependent protein kinase II gamma isoform 1 [Mus mu	9.33911e-06	30.18	59569.4	75991700	5 (3 1 0 0 1)
olfactory receptor, family 1, subfamily I, member 1 [Homo sapiens]	9.54932e-06	8.1004	39271.2	52317162	1 (0 1 0 0 0)
tubulin, alpha-like 3 [Homo sapiens]	1.10773e-05	74.143	49876.8	13376181	24 (19 2 2 1 0)
ODP2_HUMAN Dihydrolipoyllysine-residue acetyltransferase component of pyruvate	1.11283e-05	10.1221	65739.4	3915777	1 (1 0 0 0 0)
unnamed protein product [Homo sapiens]	1.13012e-05	14.1205	31292.4	7020000	2 (1 0 0 1 0)
A Chain A, Cyclophilin A Complexed With Dipeptide Gly-Pro	1.15471e-05	10.0912	17869.8	1633054	1 (1 0 0 0 0)
human PGP 9.5 homologue [cattle, Peptide Partial, 25 aa]	1.33045e-05	10.132	2810.49	236733	1 (1 0 0 0 0)
A55877 tumor necrosis factor type 1 receptor associated protein TRAP-1 - human	1.44538e-05	16.1716	75295	1082886	2 (1 0 1 0 0)
calcium/calmodulin-dependent protein kinase IIB isoform 2 [Homo sapien	1.48517e-05	40.1371	60348.7	26051206	5 (5 0 0 0 0)
G01650 malate dehydrogenase (EC 1.1.1.37), cytosolic - human [M	1.5342e-05	18.1632	36392	7431153	2 (1 1 0 0 0)
dynamin 2 isoform 1 [Homo sapiens]	1.59994e-05	28.2321	98003.3	56549121	4 (2 0 1 0 1)
proteolipid protein [Rattus norvegicus]	1.72677e-05	80.185	30057.1	13591880	24 (22 0 0 0 2)
neuronal growth regulator 1 [Homo sapiens]	1.83385e-05	18.1399	38694.3	66346706	5 (1 2 2 0 0)
phosphoglycerate mutase 2 (muscle) [Homo sapiens] [M	1.88554e-05	20.106	28201.4	51094513	3 (3 0 0 0 0)
minichromosome maintenance complex component 7 isoform 1 [Homo sapiens	1.93736e-05	20.1025	81256.7	33469968	3 (1 1 0 0 1)
BAI1_HUMAN Brain-specific angiogenesis inhibitor 1 precursor	2.08206e-05	28.0929	173421	10719900	4 (1 1 1 1 0)
RAB3B, member RAS oncogene family [Homo sapiens]	2.09597e-05	10.1532	24742.1	19923750	1 (1 0 0 0 0)
A Chain A, Crystal Structure Of Caenorhabditis Elegans Mg-Atp Actin Complexed	2.22807e-05	20.155	41637.7	14278147	2 (2 0 0 0 0)
tyrosine 3-monooxygenase/tryptophan 5-monooxygenase activation protein,	2.37505e-05	74.184	28064.8	4507949	10 (8 1 1 0 0)
heterogeneous nuclear ribonucleoprotein H2 [Homo sapiens]	2.63184e-05	28.2003	49232.3	9624998	5 (1 2 1 0 1)
novel protein similar to human mitochondrial isoleucine tRNA synthetase	2.76933e-05	26.0693	109713	27884149	3 (2 0 1 0 0)
sarco/endoplasmic reticulum Ca2+ -ATPase [Homo sapiens]	2.90787e-05	10.1269	112442	3021396	1 (1 0 0 0 0)
FXYD domain-containing ion transport regulator 6 [Homo sapiens]	2.92161e-05	10.0804	10535.4	11612655	1 (1 0 0 0 0)
syntaxin 1A (brain) [Homo sapiens]	2.95582e-05	10.1388	33002.7	4759182	1 (1 0 0 0 0)
calcium/calmodulin-dependent protein kinase IG [Homo sapiens]	2.95619e-05	10.0917	27823.5	56202635	1 (1 0 0 0 0)
phosphoprotein enriched in astrocytes 15 [Homo sapiens]	2.98696e-05	10.1517	15030.8	4505705	1 (1 0 0 0 0)
histone 2, H3, pseudogene 2 [Homo sapiens]	3.21938e-05	10.0759	15420.6	56203471	1 (1 0 0 0 0)
ornithine decarboxylase antizyme 2 [Homo sapiens]	3.56183e-05	14.105	20997.6	9845507	2 (1 0 0 1 0)
deoxynucleotidyltransferase, terminal, interacting protein 2 [Homo sap	3.68272e-05	18.0492	84417.9	54633315	2 (1 1 0 0 0)
ATRB actin, skeletal muscle - rabbit	3.89196e-05	50.1579	41789.8	71611	17 (13 3 0 1 0)
ras-related GTP-binding protein RAB10 [Homo sapiens]	3.93678e-05	18.1404	22454.6	33695095	2 (1 1 0 0 0)
peptidylprolyl isomerase A [Mus musculus]	4.19956e-05	20.1003	17959.8	6679439	2 (2 0 0 0 0)
B Chain B, T-To-T(High) Quaternary Transitions In Human Hemoglobin: Deshis146b	4.20769e-05	20.1994	15720.2	61679604	3 (3 0 0 0 0)
isocitrate dehydrogenase 2 (NADP+), mitochondrial precursor [Homo sapi	4.40383e-05	10.1612	50876.9	28178832	1 (1 0 0 0 0)
SUCA_HUMAN Succinyl-CoA ligase [GDP-forming] subunit alpha, mitochondrial pre	4.53837e-05	36.1885	35025.2	20141765	4 (3 0 1 0 0)
pol protein [Human immunodeficiency virus 2]	5.22014e-05	8.11455	117167	41056777	1 (0 1 0 0 0)
syntaxin 1B2 [Rattus norvegicus]	5.31005e-05	18.2171	33223.8	6981600	2 (1 1 0 0 0)
syntaxin 3A, isoform CRA_b [Homo sapiens]	5.9829e-05	10.0788	31998.5	119594260	1 (1 0 0 0 0)
unnamed protein product [Homo sapiens]	6.47279e-05	10.0971	27528.8	10436240	4 (2 1 1 0 0)
agrin [Homo sapiens]	6.90879e-05	8.08457	214704	54873613	1 (0 1 0 0 0)
UL57 [Human herpesvirus 5 strain AD169]	6.91373e-05	34.0825	133795	9625742	6 (1 0 2 3 0)
gycosyltransferase family 6 like-protein [Homo sapiens]	6.92913e-05	16.0701	36250.7	33285948	2 (1 0 1 0 0)
collapsin response mediator protein 1 isoform 2 [Homo sapiens]	6.93693e-05	56.176	62144.8	4503051	9 (7 0 1 1 0)
AF189009_1 ubiquitin-like product Chap1/Dsk2 [Homo sapiens]	7.00633e-05	12.1835	65723.8	6563288	2 (1 0 0 0 1)
neurofilament, light polypeptide 68kDa, isoform CRA_b [Homo sapiens] [M	7.18433e-05	10.1726	56924	119584005	2 (2 0 0 0 0)
fibrinogen, alpha polypeptide isoform alpha-E preproprotein [Homo sapie	7.52451e-05	20.1586	94914.3	4503689	2 (2 0 0 0 0)
KIAA1684 protein [Homo sapiens]	8.05894e-05	18.0687	81434.2	12697913	3 (1 0 1 0 1)
KIAA0674 protein [Homo sapiens]	9.19978e-05	18.0848	135096	3327162	2 (1 1 0 0 0)
G02520 plectin - human	9.47764e-05	78.2033	518172	7442004	13 (2 2 5 2 2)
BMX non-receptor tyrosine kinase [Homo sapiens]	0.000107155	16.0821	77961	4502435	4 (0 1 1 0 2)
A Chain A, Crystal Structure Of Constant Regulatory Domain Of Human Pp2a, Pr65a	0.000110924	32.0863	65136.1	4558258	4 (2 1 0 1 0)
Na+/K+ -ATPase beta 1 subunit isoform a [Homo sapiens]	0.00011175	44.1381	35038.9	4502277	7 (5 1 1 0 0)
NADH dehydrogenase (ubiquinone) 1 alpha subcomplex, 7, 14.5kDa [Pa	0.000113636	14.1328	13172	120952308	2 (1 0 0 1 0)
hypothetical protein LOC170062 [Homo sapiens]	0.000114283	12.057	73869.8	22749289	2 (1 0 0 0 1)
glycoprotein M6B isoform 1 [Homo sapiens]	0.000115726	10.1752	36195.7	50263048	1 (1 0 0 0 0)
unnamed protein product [Homo sapiens]	0.000119181	10.0658	48390.4	34533120	1 (1 0 0 0 0)
guanine nucleotide binding protein (G protein), gamma 3 subunit [Mus mu	0.000132704	16.086	8299.16	6754022	2 (1 0 1 0 0)
syntaxin binding protein 1 [Rattus norvegicus]	0.000134105	10.205	67525.9	6981602	1 (1 0 0 0 0)
nicotinic acetylcholine receptor alpha 3 subunit precursor [Homo sapiens]	0.000138764	10.0565	57082.6	177898	1 (1 0 0 0 0)
unnamed protein product [Homo sapiens]	0.000139054	20.1235	37237.2	16552323	2 (2 0 0 0 0)
cell adhesion molecule 3 [Homo sapiens]	0.000149387	20.1417	46991.5	11056046	3 (3 0 0 0 0)
solute carrier family 17, member 7 [Homo sapiens]	0.000151409	44.1492	61573.3	9945322	7 (2 2 2 1 0)
adenylyl cyclase-associated protein [Homo sapiens]	0.000166551	28.1575	51640.7	5453595	4 (1 1 1 1 0)
GRIA4_HUMAN Glutamate receptor 4 precursor (GluR-4) (GluR4) (GluR-D) (Glutamat	0.000170138	28.0794	100746	1346142	3 (2 1 0 0 0)
unnamed protein product [Homo sapiens]	0.000173685	8.09254	31688.7	10437523	1 (0 1 0 0 0)
guanine nucleotide binding protein (G protein), alpha inhibiting activi	0.000177166	10.1381	40425.1	4504041	1 (1 0 0 0 0)
dynein, cytoplasmic, light intermediate polypeptide 2 [Homo sapiens]	0.000192837	18.1341	54065.6	5453634	2 (1 1 0 0 0)
phosphodiesterase 2A, cGMP-stimulated [Homo sapiens]	0.00019425	42.0906	105649	4505657	5 (4 0 0 0 1)
unnamed protein product [Homo sapiens]	0.000196218	10.0491	18342.9	34535969	2 (0 0 1 1 0)
tyrosine 3/tryptophan 5 -monooxygenase activation protein, theta polype	0.000208094	10.1752	27746.8	5803227	1 (1 0 0 0 0)
Chain , Aldolase A (E.C.4.1.2.13)	0.000209032	50.1177	39264.3	229674	6 (4 0 1 1 0)
isocitrate dehydrogenase (NADP+) [Homo sapiens]	0.000209257	34.1754	50915.9	872121	4 (3 0 0 1 0)
KNP-I beta protein [Homo sapiens]	0.000240296	12.1416	20110.6	2250701	2 (1 0 0 0 1)
tubulin folding cofactor E-like [Homo sapiens]	0.00024863	8.07008	48174.5	56693215	2 (0 0 1 0 1)
IQGA3_HUMAN Ras GTPase-activating-like protein IQGAP3	0.000248687	24.0719	184431	49036087	3 (1 1 1 0 0)
phosphoprotein [Human metapneumovirus]	0.0002512	10.089	12156.3	77999025	1 (1 0 0 0 0)
envelope glycoprotein [Human immunodeficiency virus 1]	0.000255472	10.0823	97531.9	113196552	1 (1 0 0 0 0)
A Chain A, Recombinant Human Hexokinase Type I Complexed With Glucose And Phosp	0.000256838	8.06894	102419	3891376	1 (0 1 0 0 0)
carbonyl reductase 1 [Homo sapiens]	0.000263756	30.1749	30355.9	4502599	3 (3 0 0 0 0)
transcription initiation factor IIIB isoform 1 [Homo sapiens]	0.000287903	12.0664	73793.9	22035556	2 (1 0 0 0 1)
envelope glycoprotein [Human immunodeficiency virus 1]	0.000294814	8.1039	23161.6	40794030	1 (0 1 0 0 0)
unnamed protein product [Homo sapiens]	0.000297229	34.0826	47662.8	10434667	4 (2 1 1 0 0)
A Chain A, Crystal Structure Of Dictyostelium Discoideum Actin Complexed With	0.000302475	8.08977	41574.7	28374049	1 (0 1 0 0 0)
hCG1783746 [Homo sapiens]	0.000327838	8.0795	39887.8	119621264	1 (0 1 0 0 0)
KIAA0522 protein [Homo sapiens]	0.000339097	22.1028	170333	3043568	4 (1 0 1 1 1)
tubulin, alpha-like 3 [Homo sapiens]	0.000343869	8.14534	49875.8	119606853	4 (2 1 1 0 0)
polyadenylation specificity factor [Homo sapiens]	0.000366814	16.0939	24868.9	12697776	2 (1 0 1 0 0)
glycoprotein M6A isoform 1 [Homo sapiens]	0.000379036	14.107	31188.4	14149619	2 (1 0 0 1 0)
NADH dehydrogenase (ubiquinone) 1 alpha subcomplex, 5 [Homo sapiens]	0.000379665	10.1581	13450.2	4826848	1 (1 0 0 0 0)
Unknown [Homo sapiens]	0.000385314	12.1283	37662.5	4406607	4 (0 3 0 1 0)
AF166179_1 polyprotein [Human coxsackievirus A9]	0.000401922	8.14433	14925.1	6752481	10 (4 4 1 1 0)
zinc finger, DHHC-type containing 11 [Homo sapiens]	0.000410823	30.0772	45945.4	13376150	4 (3 1 0 0 0)
coronin, actin binding protein, 1A [Homo sapiens]	0.000414956	20.1521	50993.9	5902134	2 (2 0 0 0 0)
mitochondrial trifunctional protein, beta subunit precursor [Homo sapie	0.000421062	14.1191	51261.6	4504327	2 (1 0 0 1 0)
prohibitin [Homo sapiens]	0.000428808	18.1285	29785.9	4505773	2 (1 1 0 0 0)
unnamed protein product [Homo sapiens]	0.000432173	10.0715	54766.2	7023472	1 (1 0 0 0 0)
immunoglobulin heavy chain variable region [Homo sapiens]	0.000435266	8.07799	11506.5	71273837	1 (0 1 0 0 0)
tubulin, alpha 8 [Homo sapiens]	0.000441439	20.1642	50061.6	9507215	2 (2 0 0 0 0)
DLG4_HUMAN Discs large homolog 4 (Postsynaptic density protein 95) (PSD-95) (	0.000455294	10.1619	80445.9	71658825	1 (1 0 0 0 0)
ZNF91_HUMAN Zinc finger protein 91 (Zinc finger protein HTF10) (HPF7)	0.000467497	8.07457	137137	549839	2 (0 0 1 0 1)
ring finger and CCCH-type zinc finger domains 2 [Homo sapiens]	0.000483468	22.0884	96287.6	9256537	3 (1 0 2 0 0)
unnamed protein product [Homo sapiens]	0.000496089	10.0667	45947.1	10438183	1 (1 0 0 0 0)
tubulin polymerization promoting protein [Homo sapiens]	0.000497538	10.0736	23679.2	5902018	1 (1 0 0 0 0)
envelope glycoprotein [Human immunodeficiency virus 1]	0.000504859	8.06236	12789.6	116293391	1 (0 1 0 0 0)
cyclin-dependent kinase inhibitor 2B isoform 2 [Homo sapiens]	0.000515985	10.0547	8073.23	17981696	2 (0 1 0 0 1)
unnamed protein product [Homo sapiens]	0.000519266	16.0402	80424.9	7020359	3 (1 0 0 1 1)
tumor rejection antigen (gp96) 1 [Homo sapiens]	0.000527499	32.0766	92411.2	4507677	6 (2 2 0 1 1)
envelope glycoprotein [Human immunodeficiency virus 1]	0.000530792	16.1177	8728.2	28863981	2 (1 0 1 0 0)
pol protein [Human immunodeficiency virus 1]	0.000535288	8.08879	113123	86753463	1 (0 1 0 0 0)
optineurin [Homo sapiens]	0.000541784	10.1445	16735.5	55958692	1 (1 0 0 0 0)
unnamed protein product [Homo sapiens]	0.000564432	12.0789	29723.7	22760771	2 (0 0 2 0 0)
385 aa isoform	0.0005705	8.04656	45219.7	340387	1 (0 1 0 0 0)
A Chain A, Structure Of The Human PinLC8 DIMER WITH A BOUND PEPTIDE	0.000580533	20.0867	9853.93	7245516	2 (2 0 0 0 0)
protein kinase C, alpha [Homo sapiens]	0.000580591	24.1318	76714.2	4506067	3 (1 1 1 0 0)
OGFRL1 protein [Homo sapiens]	0.000583194	10.0885	41103.9	83405656	1 (1 0 0 0 0)
immunoglobulin heavy chain VHDJ region [Homo sapiens]	0.000589106	10.0885	13057.3	21668636	1 (1 0 0 0 0)
FLJ00098 protein [Homo sapiens]	0.000603135	16.0743	86718.5	10440500	2 (1 0 1 0 0)
NDUV2_HUMAN NADH dehydrogenase [ubiquinone] flavoprotein 2, mitochondrial pre	0.000604889	18.0615	27374	20455499	4 (0 1 1 0 2)
retinitis pigmentosa 1 homolog (human)-like 1 [Mus musculus]	0.000609401	16.0784	199561	27881421	3 (0 1 1 0 1)
potassium voltage-gated channel, shaker-related subfamily, beta member	0.00062622	20.0769	39262.2	27436969	2 (2 0 0 0 0)
reverse transcriptase [Human immunodeficiency virus 1]	0.000635248	8.0609	64189.1	49574245	1 (0 1 0 0 0)
unnamed protein product [Homo sapiens]	0.000652907	18.0667	68906.4	28193246	2 (1 1 0 0 0)
hCG2045126 [Homo sapiens]	0.000656355	10.0523	11289.6	119581988	3 (0 1 0 1 1)
unnamed protein product [Homo sapiens]	0.000658368	10.1808	40975.2	34532426	1 (1 0 0 0 0)
tubulin, beta 8 [Homo sapiens]	0.00066168	8.08928	49743.9	42558279	1 (0 1 0 0 0)
non-metastatic cells 1, protein (NM23A) expressed in isoform b [Homo sa	0.000694717	10.0982	17137.7	4557797	1 (1 0 0 0 0)
DPYL4_HUMAN Dihydropyrimidinase-related protein 4 (DRP-4) (Collapsin response	0.000703205	10.1747	61838.5	68067941	3 (0 2 0 0 1)
R Chain R, Twinning In Crystals Of Human Skeletal Muscle D- Glyceraldehyde-3-Pho	0.000703885	8.11258	35853.3	230867	3 (0 3 0 0 0)
tat protein [Human immunodeficiency virus 1]	0.000715537	10.0514	11493.5	38491903	8 (5 2 0 1 0)
splicing factor 3a, subunit 1, 120kDa isoform 1 [Homo sapiens]	0.00072867	4.082	88830.8	5032087	2 (0 0 0 0 2)
JN0908 H+-exporting ATPase (EC 3.6.3.6) chain D, vacuolar - human	0.000749085	18.0896	31683.9	542837	2 (1 1 0 0 0)
CPEB1_HUMAN Cytoplasmic polyadenylation element-binding protein 1 (CPE-bindin	0.000749691	8.06635	62555.1	74762720	1 (0 1 0 0 0)
A30802 Ca2+-transporting ATPase (EC 3.6.3.8) 2, plasma membrane - human	0.000771764	30.1136	134625	86988	4 (2 1 0 0 1)
hypothetical protein LOC55122 [Homo sapiens]	0.000778031	10.0772	22481.3	14149718	1 (1 0 0 0 0)
LENG4 protein [Homo sapiens]	0.000791622	10.125	38411	13623421	1 (1 0 0 0 0)
gp160 [Human immunodeficiency virus 1]	0.000795796	20.0978	96488.6	18996232	5 (0 1 1 1 2)
DEAH (Asp-Glu-Ala-His) box polypeptide 40, isoform CRA_e [Homo sapiens]	0.000803054	10.1316	50220	119614812	2 (1 1 0 0 0)
gag protein [Human immunodeficiency virus 1]	0.000810227	10.0819	15540.8	73913107	1 (1 0 0 0 0)
tropomodulin 3 (ubiquitous) [Homo sapiens]	0.000813414	10.0909	39570.3	7657649	2 (0 0 1 1 0)
phosphoglycerate mutase 1 (brain) [Homo sapiens]	0.000813789	20.1317	28785.8	4505753	2 (2 0 0 0 0)
FRAS1-related extracellular matrix protein 2 precursor [Homo sapiens]	0.00081523	24.0927	350936	79749430	3 (2 0 0 1 0)
AF267069_1 immunoglobulin A heavy chain [Homo sapiens]	0.000815708	10.0824	3469.48	8699231	2 (1 1 0 0 0)
Hypothetical protein MGC48637 [Homo sapiens]	0.000829755	16.093	32251.7	71051996	2 (1 0 1 0 0)
enolase 2 [Homo sapiens]	0.000841258	16.0901	47239.1	5803011	3 (1 0 0 1 1)
TBC1 domain family, member 9, isoform CRA_b [Homo sapiens]	0.000857209	8.09879	49942	119625498	1 (0 1 0 0 0)
glutamate dehydrogenase 1 [Homo sapiens]	0.000859775	10.1111	61359.3	4885281	1 (1 0 0 0 0)
gag protein [Human immunodeficiency virus type 1] [M	0.000869926	8.03923	16823.5	18253473	1 (0 1 0 0 0)
histone H2A.2 [Homo sapiens]	0.000875309	18.0839	13898.5	31979	2 (1 1 0 0 0)
unnamed protein product [Homo sapiens]	0.000904071	8.17581	26039.3	21758614	2 (0 2 0 0 0)
reverse transcriptase [Human immunodeficiency virus 1]	0.000907411	8.05734	24707.7	73624322	1 (0 1 0 0 0)
unactive progesterone receptor, 23 kD [Homo sapiens]	0.000921349	26.1102	18685.4	23308579	3 (2 0 1 0 0)
hypothetical protein LOC26148 [Homo sapiens]	0.000940307	28.1006	137139	24431975	3 (2 1 0 0 0)
envelope glycoprotein [Human immunodeficiency virus 1]	0.000942201	14.047	96809.8	16118392	2 (1 0 0 1 0)
neuroplastin isoform a precursor [Homo sapiens]	0.000946704	18.1389	31271.9	9257240	2 (1 1 0 0 0)
KIAA1742 protein [Homo sapiens]	0.00097026	10.0728	142042	20521982	2 (1 0 0 0 1)
MOBP [Homo sapiens]	0.000984752	14.1404	20956	1408050	2 (1 0 0 1 0)
PKHA6_HUMAN Pleckstrin homology domain-containing family A member 6 (Phosphoi	0.000988392	20.1166	117042	46397654	3 (1 1 0 0 1)
MANEAL protein [Homo sapiens]	0.000999974	10.0864	14959.6	21619436	1 (1 0 0 0 0)
KIAA0679 protein [Homo sapiens]	0.00102397	12.0614	103005	20521127	2 (0 1 0 1 0)
immunoglobulin heavy chain variable region [Homo sapiens]	0.00102623	10.0565	11511.3	40067850	1 (1 0 0 0 0)
SAPS2_HUMAN SAPS domain family member 2	0.00102997	10.0663	100943	25453068	1 (1 0 0 0 0)
leucine-rich repeat-containing G protein-coupled receptor 5 [Homo sapie	0.00114027	20.0747	99933.9	4504379	2 (2 0 0 0 0)
deoxyribonuclease I-like 3 precursor variant [Homo sapiens]	0.00118429	10.0473	17463	62088806	1 (1 0 0 0 0)
uridine diphospho-glucose dehydrogenase [Homo sapiens]	0.00118765	12.0554	16588.5	9368440	2 (1 0 0 0 1)
neurexin 1, isoform CRA_d [Homo sapiens]	0.00121536	4.06077	55550.8	119620590	2 (1 0 0 1 0)
N Chain N, Mutant Monomer Of Recombinant Human Hexokinase Type I Complexed With	0.00121764	92.1776	102383	7245424	12 (6 2 2 0 2)
myosin, heavy polypeptide 9, non-muscle [Homo sapiens]	0.00122482	40.1313	226391	12667788	7 (1 1 2 2 1)
human Ku70 autoantigen homologue [Xenopus laevis] [M	0.00122771	10.1156	69234.8	4630797	3 (0 0 1 0 2)
programmed cell death 10 [Homo sapiens]	0.00123458	20.1833	24685.8	20127517	9 (3 3 2 0 1)
envelope glycoprotein [Human immunodeficiency virus 1]	0.00126185	8.07654	20206.3	125395453	1 (0 1 0 0 0)
envelope glycoprotein [Human immunodeficiency virus type 1]	0.00126289	8.10406	22355.1	2190837	1 (0 1 0 0 0)
ubiquitin and ribosomal protein L40 precursor [Homo sapiens]	0.00126587	26.1396	14719	4507761	4 (3 0 1 0 0)
polyubiquitin [Homo sapiens]	0.00126587	8.13965	68450.1	2627129	1 (0 1 0 0 0)
TM14B_HUMAN Transmembrane protein 14B	0.00126672	18.0934	12070.3	27734593	3 (1 0 1 0 1)
KIAA1938 protein [Homo sapiens]	0.00127755	52.163	151480	27529961	8 (2 1 3 1 1)
coiled-coil transcriptional coactivator [Homo sapiens]	0.00129698	28.0866	77288.9	14149742	6 (2 1 0 2 1)
KIAA1962 protein [Homo sapiens]	0.00131678	16.0736	85259.2	18916806	3 (0 2 1 0 0)
DPOL_ADE05 DNA polymerase	0.00132509	8.08569	120324	118844	1 (0 1 0 0 0)
immunoglobulin heavy chain variable region [Homo sapiens]	0.00136895	6.10084	10793.3	112700778	2 (0 1 1 0 0)
cofilin 1 (non-muscle) [Homo sapiens]	0.00139669	28.1615	18490.7	5031635	3 (2 1 0 0 0)
chromosome 21 open reading frame 45 [Homo sapiens]	0.00143188	20.0684	25846.5	9506437	3 (1 0 1 1 0)
3'OY11.1 [Homo sapiens]	0.00143342	16.052	60544.9	2114262	2 (1 0 1 0 0)
KIAA1409 [Homo sapiens]	0.00143583	16.0854	298704	119601937	2 (1 0 1 0 0)
hCG2026048 [Homo sapiens]	0.00143692	24.0844	50958.5	119625234	3 (2 0 0 1 0)
hypothetical protein [Homo sapiens]	0.00145746	8.05783	22765	31874170	1 (0 1 0 0 0)
chromatin modifying protein 2B [Homo sapiens]	0.00146629	8.04778	23891.2	40254866	1 (0 1 0 0 0)
AC115585_10 similar to Homo sapiens (Human). KIAA1395 protein (Fragment)	0.00147951	20.0997	293560	19569943	3 (1 1 0 0 1)
Tat [Human immunodeficiency virus 1]	0.00148435	12.0603	11179.4	115334376	2 (1 0 0 0 1)
MORC family CW-type zinc finger 2 [Homo sapiens]	0.00149609	14.1063	110655	7662340	2 (0 1 1 0 0)
beta tubulin 1, class VI [Homo sapiens]	0.00150234	32.139	50294.6	13562114	8 (1 3 2 1 1)
FLJ00136 protein [Homo sapiens]	0.00150343	8.0772	90669.8	18676478	2 (0 0 1 0 1)
AF282617_1 vitellogenic carboxypeptidase-like protein [Homo sapiens] [MAS	0.00150468	4.06432	53963.1	10180964	2 (0 0 0 0 2)
hCG1820395 [Homo sapiens]	0.00151319	2.06628	9868.92	119611923	3 (1 1 0 0 1)
S31503 H+/K+-exchanging ATPase (EC 3.6.3.10) ATP1AL1 - human (fragment)	0.00152528	8.14187	10485.2	346261	1 (0 1 0 0 0)
ALS2_HUMAN Alsin (Amyotrophic lateral sclerosis protein 2) (Amyotrophic later	0.00154578	26.0792	183549	30580361	3 (1 2 0 0 0)
hCG1747788 [Homo sapiens]	0.00158268	10.1527	14554.8	119608911	6 (0 0 4 1 1)
gelsolin isoform a precursor [Homo sapiens]	0.00158312	30.0799	85644.2	4504165	3 (3 0 0 0 0)
envelope glycoprotein [Human immunodeficiency virus 1]	0.0015919	8.06055	97186.8	58374250	1 (0 1 0 0 0)
hypothetical protein LOC345651 [Homo sapiens]	0.00160884	20.1439	41976	63055057	4 (1 1 1 0 1)
AF288793_1 protease [Human immunodeficiency virus type 1]	0.00165762	8.05041	10946.1	11096041	2 (0 0 1 0 1)
leucine-rich repeat kinase 2 [Homo sapiens]	0.00167159	34.062	285872	83722282	7 (1 0 2 2 2)
CORO7_HUMAN Coronin-7 (70 kDa WD repeat tumor rejection antigen homolog)	0.00167569	10.0903	100512	12230752	1 (1 0 0 0 0)
FLJ00389 protein [Homo sapiens]	0.00169568	20.0868	39690.4	21748624	2 (2 0 0 0 0)
signal-induced proliferation-associated gene 1, isoform CRA_a [Homo sap	0.00169906	14.0508	67235.2	119594827	2 (0 1 1 0 0)
thymidine kinase [Human herpesvirus 3]	0.00170334	8.06423	18663.4	5926720	1 (0 1 0 0 0)
AF204421_1 envelope glycoprotein [Human immunodeficiency virus type 1] [MA	0.00172265	8.11357	22923.3	6540322	4 (0 4 0 0 0)
similar to t-complex 1; T-complex locus TCP-1; t-complex 1 (a murine tcp	0.00172857	18.0813	19812.7	51094756	32 (20 5 5 1 1)
hCG19408 [Homo sapiens]	0.00175292	4.1451	13754.4	119623204	5 (0 0 1 1 3)
gag protein [Human immunodeficiency virus 1]	0.00177099	8.07333	54763.9	62997623	1 (0 1 0 0 0)
immunoglobulin heavy chain variable region [Homo sapiens]	0.00179762	10.0533	10771.3	112701503	1 (1 0 0 0 0)
adenomatosis polyposis coli 2 [Homo sapiens]	0.00180105	24.1028	243796	5031587	8 (0 3 2 2 1)
unnamed protein product [Homo sapiens]	0.00183585	18.0982	68866	7022885	6 (2 2 0 0 2)
vpu protein [Human immunodeficiency virus 1]	0.00184541	8.07164	9899.35	82571345	1 (0 1 0 0 0)
unnamed protein product [Homo sapiens]	0.0018563	8.07148	64413.9	7020006	1 (0 1 0 0 0)
histone H2A [Homo sapiens]	0.00185698	32.1242	13986.8	28195394	5 (4 0 0 0 1)
spectrin, beta, non-erythrocytic 2 [Homo sapiens]	0.00186109	32.0807	271125	5902122	7 (1 3 2 0 1)
unnamed protein product [Homo sapiens]	0.00188748	8.06615	13991.5	21749053	1 (0 1 0 0 0)
X unnamed protein product [Homo sapiens]	0.00189904	10.0647	36898.3	134105134	3 (2 0 0 1 0)
hypothetical gene supported by AK126539 [Homo sapiens]	0.00190258	26.0647	221266	119605560	5 (1 1 1 0 2)
hypothetical protein [Homo sapiens]	0.00193366	12.0475	90143.3	21740064	3 (0 1 0 0 2)
pol protein [Human immunodeficiency virus 1]	0.00195603	8.09489	48087.7	27452739	1 (0 1 0 0 0)
A Chain A, Crystal Structure Of Human G[alpha]i1 Bound To The Goloco Motif Of	0.00196456	10.0892	37087.7	21465862	1 (1 0 0 0 0)
general transcription factor IIE, polypeptide 2, beta 34kDa [Homo sapie	0.00196903	20.1081	33023.4	4504195	3 (0 2 0 1 0)
unknown [Homo sapiens]	0.00196938	8.06985	16235.2	62988693	2 (0 0 1 0 1)
unnamed protein product [Homo sapiens]	0.0019924	32.119	158980	10435855	5 (3 0 2 0 0)
ubiquitin carboxyl-terminal esterase L1 (ubiquitin thiolesterase) [Hom	0.00201568	20.1506	24808.5	21361091	2 (2 0 0 0 0)
Env [Human immunodeficiency virus 1]	0.002056	6.06747	100281	115334379	2 (0 0 0 1 1)
unnamed protein product [Homo sapiens]	0.00206503	14.1143	63987.6	7020785	3 (0 0 2 0 1)
WIRE protein [Homo sapiens]	0.00206553	10.0656	46260.2	18959210	1 (1 0 0 0 0)
unnamed protein product [Homo sapiens]	0.00206815	10.1307	19667.9	7020367	5 (1 0 1 1 2)
B Chain B, Crystal Structure Of Recombinant Human Fibrinogen Fragment D	0.00206994	26.0911	35875	24987624	4 (2 0 0 1 1)
hCG1645384, isoform CRA_a [Homo sapiens]	0.00209578	8.0937	58379.8	119569427	1 (0 1 0 0 0)
hnRNP U protein [Homo sapiens]	0.00210201	20.1499	88890.2	32358	3 (1 1 0 0 1)
netrin receptor Unc5h4 [Homo sapiens]	0.00210492	18.0876	105424	18254472	3 (0 1 1 1 0)
N-ethylmaleimide sensitive fusion protein attachment protein beta [Mus	0.00212255	16.1293	33535.5	29789104	3 (2 0 1 0 0)
tat protein [Human immunodeficiency virus 1]	0.00216095	10.0556	11331.5	16118265	1 (1 0 0 0 0)
olfactory receptor, family 1, subfamily M, member 1 [Homo sapiens]	0.00218665	8.0939	34816.2	52218828	1 (0 1 0 0 0)
annexin VI isoform 1 [Homo sapiens]	0.00221247	10.0585	75825.7	71773329	1 (1 0 0 0 0)
histidine-tRNA ligase [Dictyostelium discoideum AX4]	0.00223094	8.05712	54458.6	66821749	1 (0 1 0 0 0)
envelope glycoprotein [Human immunodeficiency virus 1]	0.00223984	8.06195	24500.3	62904315	1 (0 1 0 0 0)
receptor tyrosine kinase-like orphan receptor 2 [Homo sapiens]	0.00225216	10.0937	79218.8	55665675	1 (1 0 0 0 0)
P_HUMAN P protein (Melanocyte-specific transporter protein) (Pink-eyed diluti	0.00226262	20.0775	92790.2	90110050	3 (0 1 2 0 0)
H3 histone, family 3A [Homo sapiens]	0.00228065	74.1251	15318.5	4504279	15 (9 3 1 1 1)
A45036 single-stranded-DNA-binding protein Pur alpha - human [MA	0.00228207	10.1079	34948.5	346338	1 (1 0 0 0 0)
AF327296_1 T cell receptor alpha chain [Homo sapiens]	0.00232664	10.0392	7487.64	13649914	1 (1 0 0 0 0)
RL10_TOBAC 60S ribosomal protein L10 (QM protein homolog)	0.0023357	10.0751	16506.8	2500355	2 (0 1 0 0 1)
S73539_1 Unknown [Homo sapiens]	0.00234042	6.10444	2923.54	4261831	8 (1 2 1 3 1)
KIAA0853 protein [Homo sapiens]	0.00234225	26.1108	112765	4240195	4 (0 2 1 1 0)
AF383244_1 envelope glycoprotein [Human immunodeficiency virus type 1] [M	0.00235458	14.0875	97064.7	19773769	2 (0 1 1 0 0)
PPCKM_HUMAN Phosphoenolpyruvate carboxykinase [GTP], mitochondrial precursor (	0.00236452	18.0534	70591.7	3287892	2 (1 1 0 0 0)
unnamed protein product [Homo sapiens]	0.00236864	18.0847	32185.6	10432632	2 (1 1 0 0 0)
envelope glycoprotein [Human immunodeficiency virus 1]	0.00236875	4.0621	93600.6	86450878	3 (0 1 0 1 1)
envelope glycoprotein [Human immunodeficiency virus type 1]	0.00236875	2.0621	14643.3	15811095	3 (1 0 0 1 1)
envelope glycoprotein gp105 [Human immunodeficiency virus 2]	0.00237075	8.07579	12631.4	8671074	1 (0 1 0 0 0)
hypothetical protein LOC389763 [Homo sapiens]	0.00237102	28.0664	175508	48717285	5 (0 3 0 2 0)
hCG2031596 [Homo sapiens]	0.0023734	10.0641	3149.59	119627092	1 (1 0 0 0 0)
C8orfK32 protein [Homo sapiens]	0.00243324	20.0778	125483	83016723	4 (1 2 0 1 0)
peptidylprolyl isomerase (cyclophilin)-like 6 [Homo sapiens]	0.00243758	8.12555	35205.7	27735045	2 (0 0 1 0 1)
heterogeneous nuclear ribonucleoprotein K [Mus musculus]	0.00246785	10.1309	50944.4	13384620	1 (1 0 0 0 0)
unnamed protein product [Homo sapiens]	0.00251918	24.0991	70979.4	10435364	3 (1 1 1 0 0)
synaptobrevin-like 1 [Homo sapiens]	0.0025353	12.0825	24919	5032137	2 (1 0 0 0 1)
KIAA1394 protein [Homo sapiens]	0.00257331	10.0729	106665	7243169	1 (1 0 0 0 0)
interleukin 17B, isoform CRA_a [Homo sapiens] [MAS	0.00259443	10.0908	12881.6	119582185	2 (1 0 1 0 0)
teashirt family zinc finger 2 [Homo sapiens]	0.00259608	10.0918	114817	40255168	1 (1 0 0 0 0)
ethanolamine kinase 1 isoform A [Homo sapiens]	0.00260262	8.05428	50936	10092615	1 (0 1 0 0 0)
unnamed protein product [Homo sapiens]	0.00262244	12.0789	125143	34536041	4 (0 1 1 1 1)
GAL3ST1 protein [Homo sapiens]	0.00263157	12.0736	48765	15779172	3 (0 0 1 1 1)
alkaline deoxyribonuclease [Human herpesvirus 1] [M	0.00264361	10.0521	67442.3	5926768	2 (0 1 0 0 1)
BTB (POZ) domain containing 11 isoform 3 [Homo sapiens]	0.00266037	8.09841	120807	65786661	2 (0 0 1 0 1)
Pol [Human immunodeficiency virus 1]	0.00268409	8.10547	114353	114430653	1 (0 1 0 0 0)
tau-tubulin kinase [Homo sapiens]	0.00270355	6.04606	182352	27451602	2 (0 0 0 1 1)
pol protein [Human immunodeficiency virus 1]	0.00271782	14.1084	46576.1	14289657	6 (1 1 3 1 0)
hypothetical protein LOC375057 [Homo sapiens]	0.00272287	10.0977	14996.8	51092270	2 (2 0 0 0 0)
similar to GenBank Accession Number AF045184 nuclear receptor coactivato	0.0027246	26.1896	25758.4	29841015	16 (4 5 4 2 1)
PLEKHA5 protein [Homo sapiens]	0.00272823	4.0633	55957.5	12654297	2 (1 0 0 1 0)
dihydropyrimidinase [Homo sapiens]	0.00273927	14.0914	56593.8	4503375	2 (0 1 1 0 0)
hypothetical protein [Homo sapiens]	0.00277394	14.1122	110722	52545742	3 (1 0 0 0 2)
cytoskeleton associated protein [Homo sapiens]	0.00277939	10.083	21787.7	736704	1 (1 0 0 0 0)
vpu protein [Human immunodeficiency virus 1]	0.00278657	10.0911	9706.32	51572109	5 (0 0 2 2 1)
methyltransferase like 8 [Homo sapiens]	0.00279486	18.0751	27526.6	13376117	2 (1 1 0 0 0)
synapsin I isoform Ia [Homo sapiens]	0.00286594	70.1053	74065.8	19924099	10 (8 0 1 1 0)
nidogen [Homo sapiens]	0.00287538	18.0818	136318	1155011	2 (1 1 0 0 0)
hCG33128, isoform CRA_b [Homo sapiens]	0.00287992	16.0923	78061.7	119628915	8 (2 3 1 1 1)
actin-like protein [Homo sapiens]	0.00291334	8.07563	11548	62420916	1 (0 1 0 0 0)
elongation factor G isoform [Homo sapiens]	0.00294195	10.0307	59277.1	44903437	1 (1 0 0 0 0)
reverse transcriptase [Human immunodeficiency virus 1]	0.00295274	8.08031	24743.7	25282181	1 (0 1 0 0 0)
myosin ID [Homo sapiens]	0.00295475	32.1504	116129	51100974	5 (1 1 1 2 0)
chromosome 12 open reading frame 53, isoform CRA_b [Homo sapiens]	0.0029796	8.08841	2636.3	119609158	3 (1 2 0 0 0)
myelin basic protein isoform 4 [Homo sapiens]	0.00298057	10.1347	17332.8	68509932	1 (1 0 0 0 0)
novel protein [Homo sapiens]	0.00298625	10.0561	23258.5	57209187	2 (0 1 0 0 1)
A Chain A, Crystal Structure Of Human Agx1 Complexed With Udpglcnac	0.00299176	16.075	56992.2	23200205	2 (1 0 1 0 0)
hypothetical protein [Homo sapiens]	0.00300763	26.0645	80545.9	60219514	3 (2 0 1 0 0)
calpain, small subunit 1 [Homo sapiens]	0.00300862	12.1084	28297.7	4502565	2 (1 0 0 0 1)
delta-globin Troodos variant [Homo sapiens]	0.00302324	8.09809	15992.2	73762521	1 (0 1 0 0 0)
KIAA0658 protein [Homo sapiens]	0.00306503	16.0542	66530	3327130	2 (0 2 0 0 0)
cirrhosis, autosomal recessive 1A (cirhin) [Rattus norvegicus]	0.00307188	10.0677	76814.8	57528225	1 (1 0 0 0 0)
A41273 glutamate receptor precursor - human (fragment)	0.00308207	10.0605	100587	106114	1 (1 0 0 0 0)
AT rich interactive domain 3A (BRIGHT- like) protein [Homo sapiens]	0.00308587	8.07503	62850.1	4885193	2 (0 0 0 2 0)
CENPL protein [Homo sapiens]	0.00311576	8.09727	43711.1	21620044	1 (0 1 0 0 0)
KIAA2014 protein [Homo sapiens]	0.00311685	10.0617	117150	71891717	1 (1 0 0 0 0)
N-ethylmaleimide-sensitive factor [Homo sapiens] [M	0.0031349	26.0977	82542.2	21040484	4 (1 1 0 2 0)
envelope glycoprotein [Human immunodeficiency virus 1]	0.00316289	10.1039	18166.1	8489306	1 (1 0 0 0 0)
advanced glycosylation end product-specific receptor isoform 2 precurs	0.0032245	8.06035	36170.7	26787962	3 (0 2 1 0 0)
helicase-like transcription factor [Homo sapiens]	0.00325264	8.08125	113857	21071052	1 (0 1 0 0 0)
envelope glycoprotein [Human immunodeficiency virus 1]	0.0033037	10.1042	98032.4	90993414	1 (1 0 0 0 0)
connector enhancer of kinase suppressor of Ras 2 [Homo sapiens]	0.00330651	10.0554	117461	41393057	1 (1 0 0 0 0)
pol polyprotein [Human immunodeficiency virus type 1]	0.00330764	8.06191	45799.4	13738850	1 (0 1 0 0 0)
envelope glycoprotein [Human immunodeficiency virus type 1]	0.00331278	8.05829	8287.92	3065384	1 (0 1 0 0 0)
KIAA1256 protein [Homo sapiens]	0.00340103	10.0953	191059	6330911	4 (0 0 0 2 2)
hCG1641167, isoform CRA_a [Homo sapiens]	0.00340422	16.0696	95223	119595409	2 (0 2 0 0 0)
fibroblast growth factor 11 [Homo sapiens]	0.00349504	10.0771	24989	4758362	1 (1 0 0 0 0)
alpha 2 globin [Homo sapiens]	0.00351011	10.0691	15247.9	4504345	1 (1 0 0 0 0)
XYLB_HUMAN Xylulose kinase (Xylulokinase)	0.00352042	8.11233	57339.5	74722196	2 (0 2 0 0 0)
phospholipase A2, group IVB [Homo sapiens]	0.00352542	16.0484	114049	4826914	10 (1 4 1 2 2)
ADEN_ADE03 Adenain (Endoprotease) (Late L3 23 kDa protein)	0.00354576	8.12307	23778.5	139365	5 (0 1 0 3 1)
I38080 replication licensing factor MCM5 - human	0.00357608	10.081	82192.3	2135871	1 (1 0 0 0 0)
unnamed protein product [Homo sapiens]	0.00358315	10.086	71374.3	10436857	1 (1 0 0 0 0)
transmembrane protein 30A [Homo sapiens]	0.00358744	10.0853	40657.7	8922720	1 (1 0 0 0 0)
alanine:glyoxylate aminotransferase [Homo sapiens] [M	0.00359759	10.0708	43042.5	219433	1 (1 0 0 0 0)
ORF 56 [Human herpesvirus 8 type M]	0.00363096	20.0529	95492.8	18846023	2 (2 0 0 0 0)
unnamed protein product [Homo sapiens]	0.00371415	6.08102	29806.2	10440293	2 (0 0 0 1 1)
hypothetical protein LOC54823 [Homo sapiens]	0.00372204	4.04548	103136	31982897	2 (0 0 0 0 2)
gag-pol fusion polyprotein precursor [Human immunodeficiency virus 1]	0.0037273	14.0756	108830	148745903	2 (1 0 0 1 0)
Ig heavy chain (VH4) V region (VDJ) [Homo sapiens] [	0.00373909	10.0521	10790.4	563393	1 (1 0 0 0 0)
envelope glycoprotein [Human immunodeficiency virus type 1]	0.00374798	10.0775	23019.4	15149205	1 (1 0 0 0 0)
p40 [Homo sapiens]	0.00377686	12.1134	40016.7	2072950	3 (0 0 1 1 1)
envelope glycoprotein [Human immunodeficiency virus 1]	0.00377811	8.10451	11710	62080093	1 (0 1 0 0 0)
Solute carrier family 36 (proton/amino acid symporter), member 2 [Homo s	0.00378689	8.07786	53181.4	71681857	2 (0 0 1 0 1)
leucine rich repeat containing 4 [Homo sapiens]	0.00379763	12.1013	72670.9	15029530	4 (2 1 0 0 1)
unnamed protein product [Homo sapiens]	0.0038294	14.078	33884.7	7019812	2 (1 0 0 1 0)
envelope glycoprotein [Human immunodeficiency virus 1]	0.00383237	10.0904	21974.4	48249803	1 (1 0 0 0 0)
GLI-Kruppel family member GLI3 [Homo sapiens]	0.00385259	22.1162	169756	119393899	3 (2 0 0 0 1)
integrin alpha-4 subunit [Homo sapiens]	0.00385718	8.08729	20044.5	24421069	1 (0 1 0 0 0)
BIRC6_HUMAN Baculoviral IAP repeat-containing protein 6 (Ubiquitin-conjugatin	0.00385976	22.071	527277	12585192	3 (2 0 0 0 1)
FLJ00181 protein [Homo sapiens]	0.00389115	10.0721	41493.1	18676568	3 (0 1 0 1 1)
envelope glycoprotein [Human immunodeficiency virus type 1]	0.00392729	8.16278	11767	3851125	1 (0 1 0 0 0)
olfactory receptor, family 9, subfamily I, member 1 [Homo sapiens]	0.00393481	8.05627	34884.4	52627201	1 (0 1 0 0 0)
envelope glycoprotein [Human immunodeficiency virus 1]	0.00395773	4.09643	38900.1	45359551	2 (0 1 0 1 0)
envelope glycoprotein [Human immunodeficiency virus 1]	0.0039702	10.059	93450.1	87248739	1 (1 0 0 0 0)
unnamed protein product [Homo sapiens]	0.0039821	8.08881	71633	7022933	1 (0 1 0 0 0)
Shank2E [Homo sapiens]	0.00400057	12.1163	78504.7	73543369	2 (0 1 0 1 0)
KIAA1345 protein [Homo sapiens]	0.00400187	18.1242	175742	7243071	3 (2 1 0 0 0)
envelope glycoprotein [Human immunodeficiency virus type 1]	0.00402082	8.09951	10536.5	1532234	1 (0 1 0 0 0)
T cell receptor beta chain variable region [Homo sapiens]	0.00407731	6.08053	8319.16	6114708	2 (0 1 1 0 0)
pol protein [Human immunodeficiency virus 1]	0.00409357	10.0841	113617	112497792	2 (2 0 0 0 0)
hypothetical protein LOC563394 [Danio rerio]	0.00409706	16.0826	93485.9	122937177	5 (1 0 0 2 2)
hCG2010747 [Homo sapiens]	0.00415612	4.08974	11936.9	119579985	3 (0 2 0 1 0)
envelope glycoprotein [Human immunodeficiency virus type 1]	0.00415801	10.0865	14375.4	7248181	2 (1 1 0 0 0)
olfactory receptor, family 7, subfamily D, member 4 [Homo sapiens]	0.00417062	8.10077	34424.6	52353282	1 (0 1 0 0 0)
KIAA0056 [Homo sapiens]	0.00417693	32.0948	169609	473941	4 (2 0 2 0 0)
AF1 non-allergic IgE heavy chain IGHV1-8 [Homo sapiens]	0.00419651	8.10251	14822.2	56786062	2 (0 2 0 0 0)
envelope glycoprotein [Human immunodeficiency virus 1]	0.00421232	8.09515	96773.1	116518619	2 (0 2 0 0 0)
unnamed protein product [Homo sapiens]	0.00423676	4.07761	96016.1	10434992	2 (0 0 0 0 2)
solute carrier family 17 (sodium-dependent inorganic phosphate cotr	0.00424224	12.1145	55962.2	53292617	2 (1 0 0 0 1)
hypothetical protein LOC79081 [Homo sapiens]	0.00424771	8.07325	28741.3	46198301	1 (0 1 0 0 0)
peptidylprolyl isomerase-like 1 [Homo sapiens]	0.00425162	14.1077	18225.1	7706339	3 (1 1 0 1 0)
hypothetical protein LOC91442 [Homo sapiens]	0.00428402	8.06464	23881.8	22748623	2 (0 1 0 1 0)
AF296673_1 toll-like receptor 10 [Homo sapiens] [MAS	0.00429994	14.0615	94515.4	13447753	2 (0 1 1 0 0)
cytochrome c oxidase subunit IV isoform 1 precursor [Homo sapiens]	0.0043018	18.0844	19564	4502981	2 (1 1 0 0 0)
voltage-dependent calcium channel alpha 1G subunit isoform 15 [Homo sa	0.0043311	10.0817	171276	38505294	1 (1 0 0 0 0)
envelope glycoprotein [Human immunodeficiency virus type 1]	0.00433203	18.1111	22492.5	5758282	3 (0 0 3 0 0)
UV excision repair protein RAD23 homolog A variant [Homo sapiens]	0.00435448	8.06798	41230.6	62089006	1 (0 1 0 0 0)
hypothetical protein [Homo sapiens]	0.0043571	16.0558	114900	50949852	3 (0 1 0 2 0)
chromosome 12 open reading frame 28 [Homo sapiens]	0.00435989	12.063	88871.6	119617649	2 (1 0 0 0 1)
AF405923_1 envelope glycoprotein [Human immunodeficiency virus 1]	0.00437375	10.0606	33330.1	18651184	1 (1 0 0 0 0)
protein kinase C, theta [Homo sapiens]	0.00437759	8.09828	81810.8	5453976	1 (0 1 0 0 0)
novel protein similar to H.sapiens ZWILCH, Zwilch, kinetochore associa	0.00439429	14.0872	66036.4	148726288	2 (1 0 0 1 0)
nucleolar protein NOP5/NOP58 [Homo sapiens]	0.00441262	12.0889	59540.6	7706254	2 (0 0 2 0 0)
reverse transcriptase [Human immunodeficiency virus 1]	0.00442738	10.1222	20828.8	31871490	1 (1 0 0 0 0)
solute carrier family 16, member 8 [Homo sapiens]	0.0044904	8.05907	52285.4	114796626	1 (0 1 0 0 0)
envelope protein [Human immunodeficiency virus 1] [	0.00449218	10.1357	95064.9	11124719	1 (1 0 0 0 0)
Protein phosphatase 2 (formerly 2A), regulatory subunit B'', beta [Homo	0.00449912	10.093	65047.4	39795433	1 (1 0 0 0 0)
ankyrin repeat domain 41 [Homo sapiens]	0.0045022	28.0882	62196.8	40255104	4 (1 1 1 1 0)
nef protein [Human immunodeficiency virus 1]	0.00450575	8.05917	23060.4	59895847	1 (0 1 0 0 0)
hCG2029642 [Homo sapiens]	0.00450856	8.0904	8592.29	119567954	1 (0 1 0 0 0)
PRP8 protein [Homo sapiens]	0.00457077	34.0765	273609	2463577	5 (0 2 3 0 0)
unnamed protein product [Homo sapiens]	0.00458346	14.0555	32715.4	34529470	2 (1 0 0 1 0)
hCG1984886, isoform CRA_b [Homo sapiens]	0.00461812	22.0839	23977.2	119576170	3 (1 0 2 0 0)
centrosomal protein 192kDa [Homo sapiens]	0.00462032	8.11963	213012	50811889	2 (0 1 0 0 1)
oxidation resistance 1 [Homo sapiens]	0.00468749	10.0455	84898.6	32490583	1 (1 0 0 0 0)
TPA: schlafen 5 [Homo sapiens]	0.00469544	12.0441	62435.6	42627763	3 (0 1 0 0 2)
AF155096_1 NY-REN-6 antigen [Homo sapiens]	0.00473574	6.12798	50678.6	5360087	3 (0 1 1 0 1)
Ig heavy chain variable region [Homo sapiens]	0.00477397	10.0611	8296.1	2808951	1 (1 0 0 0 0)
tat protein [Human immunodeficiency virus 1]	0.00478173	10.0548	11521.7	37683041	1 (1 0 0 0 0)
SR protein kinase (SRPK) involved in regulating proteins involved in mR	0.00487385	10.0847	83185.8	6323872	2 (0 0 1 1 0)
WMBEHQ UL5 protein - human herpesvirus 2 (strain HG52) (fragment)	0.00487593	12.1297	88093.8	74001	5 (0 2 1 1 1)
immunoglobulin heavy chain variable region [Homo sapiens]	0.00489625	8.04509	12039.6	71273894	1 (0 1 0 0 0)
hCG1811509 [Homo sapiens]	0.00490679	10.0653	25270.2	119575895	1 (1 0 0 0 0)
envelope glycoprotein [Human immunodeficiency virus type 1]	0.00490843	12.0913	57535.7	19568959	5 (0 0 2 1 2)
hypothetical protein LOC387104 [Homo sapiens]	0.00491989	14.1104	103136	59806361	3 (0 0 1 2 0)
T cell receptor alpha variable 3 [Homo sapiens] [MAS	0.00494575	18.044	1595.81	70913356	3 (1 1 0 0 1)
DEAD/H (Asp-Glu-Ala-Asp/His) box polypeptide 26B [Homo sapiens]	0.00496018	12.096	96611.9	94536743	2 (0 1 0 1 0)
A Chain A, The 1.9-A Crystal Structure Of The Noncollagenous (Nc1) Domain Of H	0.00496346	10.0783	25314	21466080	1 (1 0 0 0 0)
vpu protein [Human immunodeficiency virus 1]	0.00497387	8.04982	9916.29	93210848	1 (0 1 0 0 0)
C-type lectin domain family 3 member A [Homo sapiens]	0.00500117	8.1032	22218.5	148728186	2 (0 1 1 0 0)
gag protein [Human immunodeficiency virus type 1] [	0.00501547	8.09005	30801	13445593	1 (0 1 0 0 0)
FLJ00259 protein [Homo sapiens]	0.00508284	10.049	70230.5	34526491	1 (1 0 0 0 0)
unnamed protein product [Homo sapiens]	0.00508291	10.0622	28573.1	21752186	1 (1 0 0 0 0)
unnamed protein product [Homo sapiens]	0.00508888	18.0654	17332.7	10440287	3 (1 0 0 2 0)
HEAT repeat containing 4 [Homo sapiens]	0.00510681	22.0888	111807	42558270	3 (1 1 0 1 0)
opioid binding protein/cell adhesion molecule-like isoform a preproprot	0.0051213	20.0771	37983.3	4505505	2 (2 0 0 0 0)
heterogeneous nuclear ribonucleoprotein C-like 1 [Homo sapiens]	0.00516998	22.0579	32122.7	61966711	3 (1 1 0 1 0)
diacylglycerol kinase delta2 [Homo sapiens]	0.0052065	8.05122	134426	22773821	2 (0 0 0 2 0)
DDX20_HUMAN Probable ATP-dependent RNA helicase DDX20 (DEAD box protein 20) (	0.00523261	10.0809	92182.4	12643886	3 (0 0 1 0 2)
AF151823_1 CGI-65 protein [Homo sapiens]	0.00523485	10.0522	37706.1	4929599	1 (1 0 0 0 0)
precursor [Homo sapiens]	0.00523882	8.06839	20768.2	31778	2 (0 0 0 2 0)
envelope glycoprotein [Human immunodeficiency virus 1]	0.00525807	8.09488	24214.1	62906499	1 (0 1 0 0 0)
envelope glycoprotein [Human immunodeficiency virus type 1]	0.00526616	8.05814	7204.8	2584894	1 (0 1 0 0 0)
polyprotein [Human enterovirus C]	0.00528584	8.09734	44982.5	126116654	2 (0 1 0 0 1)
uveal autoantigen with coiled-coil domains and ankyrin repeats isoform	0.00533159	18.1074	162404	59850762	3 (0 2 0 0 1)
C17orf1 protein [Homo sapiens]	0.0053329	10.073	52400.3	3873561	1 (1 0 0 0 0)
hypothetical protein LOC256329 [Homo sapiens]	0.00535435	10.0958	70365.4	27734829	2 (2 0 0 0 0)
hCG1646195 [Homo sapiens]	0.00537552	10.0907	49484.1	119628465	3 (0 0 1 1 1)
envelope glycoprotein [Human immunodeficiency virus 1]	0.00538835	2.05695	12718.4	22202911	3 (0 1 0 0 2)
C4ORF12 protein [Homo sapiens]	0.00541643	10.0401	10321.3	37955166	1 (1 0 0 0 0)
hair type II basic keratin [Homo sapiens]	0.00545802	28.0626	47004.2	1181996	3 (2 1 0 0 0)
tudor domain containing 6 [Homo sapiens]	0.00550678	12.0569	236366	58197558	4 (0 0 1 0 3)
orf [Homo sapiens]	0.00551334	10.0989	53903.2	804996	1 (1 0 0 0 0)
E1A binding protein p400, isoform CRA_a [Homo sapiens]	0.00552086	8.09081	334553	119618940	2 (0 0 1 0 1)
gp120 [Human immunodeficiency virus 1]	0.00553317	10.0366	18384.4	15865409	1 (1 0 0 0 0)
envelope glycoprotein [Human immunodeficiency virus 1]	0.00555285	8.07346	15055.6	88698302	1 (0 1 0 0 0)
AF100772_1 tenascin-M1 [Homo sapiens]	0.00559125	14.0924	304700	6165845	2 (0 1 1 0 0)
ATP synthase, H+ transporting, mitochondrial F1 complex, delta subunit	0.00560716	10.107	17479.2	4502297	1 (1 0 0 0 0)
envelope glycoprotein [Human immunodeficiency virus type 1]	0.00561656	6.13585	27757.1	1845711	2 (0 1 1 0 0)
CE152_HUMAN Centrosomal protein of 152 kDa (Cep152 protein)	0.00562898	10.1784	147252	62286590	11 (0 2 3 3 3)
Fanconi anemia, complementation group C [Homo sapiens]	0.00562945	10.059	63387.7	56118236	1 (1 0 0 0 0)
novel protein similar to human and mouse steroid receptor-interacting S	0.00569938	4.07211	144346	94732329	2 (0 0 0 0 2)
reverse transcriptase [Human immunodeficiency virus]	0.00570131	6.08939	7993.33	5596860	2 (1 0 1 0 0)
cornulin [Homo sapiens]	0.00575865	16.0993	53501.6	7706635	2 (1 0 1 0 0)
truncated gag protein [Human immunodeficiency virus 1]	0.0057813	8.06771	15477.4	85700484	1 (0 1 0 0 0)
KIAA0745 protein [Homo sapiens]	0.0057826	28.0921	103453	3882211	4 (1 1 1 1 0)
AF470970_1 pol polyprotein [Human immunodeficiency virus type 1]	0.00578548	10.0686	41084.8	21686042	1 (1 0 0 0 0)
glutamate dehydrogenase (NAD(P)+) [Homo sapiens]	0.00584713	22.0943	61394.6	31815	4 (1 1 0 1 1)
RENT1_HUMAN Regulator of nonsense transcripts 1 (ATP-dependent helicase RENT1	0.00591986	12.1048	124267	17380291	3 (0 0 1 1 1)
A Chain A, Crystal Structure Of Human Cathepsin V Complexed With An Irreversib	0.00593181	20.0763	23998.6	15826035	2 (2 0 0 0 0)
envelope glycoprotein [Human immunodeficiency virus type 1]	0.00593648	10.0724	22598.2	10303759	1 (1 0 0 0 0)
envelope glycoprotein [Human immunodeficiency virus 1]	0.00593929	10.0915	98638.6	51950777	1 (1 0 0 0 0)
AF383229_1 envelope glycoprotein [Human immunodeficiency virus type 1] [M	0.00597847	20.0857	97513.6	19773739	2 (2 0 0 0 0)
pol protein [Human immunodeficiency virus 1]	0.00599644	10.0425	58499.8	148361757	1 (1 0 0 0 0)
NADH dehydrogenase (ubiquinone) 1 alpha subcomplex, 10, 42kDa precursor	0.00599905	28.0808	40725	4758768	4 (1 2 0 0 1)
POL precursor [Human immunodeficiency virus 1] [MAS	0.00601943	6.14426	60252.8	9756232	8 (0 1 3 1 3)
histone cluster 1, H1c [Homo sapiens]	0.00602969	10.0771	21351.8	4885375	1 (1 0 0 0 0)
calcium channel, voltage-dependent, N type, alpha 1B subunit [Homo sapi	0.00603737	18.053	262326	4502523	3 (0 1 1 1 0)
KIAA0356 protein [Homo sapiens]	0.00605504	26.1159	117597	6634023	3 (2 0 1 0 0)
A Chain A, Human Heart L-Lactate Dehydrogenase H Chain, Ternary Complex With N	0.00608151	10.0818	36484.1	13786847	1 (1 0 0 0 0)
envelope glycoprotein [Human immunodeficiency virus 1]	0.00608897	8.08815	99093.3	30314773	1 (0 1 0 0 0)
hypothetical protein LOC79719 [Homo sapiens]	0.00615035	8.05488	34483.9	20070335	2 (0 0 1 0 1)
immunoglobulin kappa CDR3 region [Homo sapiens] [MA	0.00620416	8.0607	2269.04	72535446	2 (0 2 0 0 0)
immunoglobulin heavy chain variable region [Homo sapiens]	0.00620942	10.093	7603.75	112702703	1 (1 0 0 0 0)
DNA polymerase eta [Homo sapiens]	0.00622567	10.0952	128835	4163931	1 (1 0 0 0 0)
unnamed protein product [Homo sapiens]	0.00632338	14.0575	37728	21751299	2 (0 1 1 0 0)
RYR3_HUMAN Ryanodine receptor 3 (Brain-type ryanodine receptor) (RyR3) (RYR-3	0.00632484	20.0717	551577	18202506	3 (0 2 0 1 0)
nudix -type motif 12 [Homo sapiens]	0.00633166	8.13654	52042.8	13899267	1 (0 1 0 0 0)
gag protein [Human immunodeficiency virus 1]	0.00635705	10.0497	14830.5	27948615	1 (1 0 0 0 0)
immunoglobulin heavy chain variable region [Homo sapiens]	0.00636815	10.0473	11857.6	71273686	1 (1 0 0 0 0)
immunoglobulin heavy chain variable region [Homo sapiens]	0.00636815	8.04478	12734.1	5679488	1 (0 1 0 0 0)
activator of S phase kinase [Homo sapiens]	0.00636818	14.0659	76766	51094925	2 (1 0 0 1 0)
AF138168_1 envelope glycoprotein [Human immunodeficiency virus type 1] [MA	0.00640272	10.1327	23265.5	6958322	4 (1 0 1 1 1)
heat shock 70kDa protein 9B precursor [Homo sapiens]	0.00643898	30.106	73634.8	24234688	3 (3 0 0 0 0)
JC5277 G protein-coupled receptor GPR25 - human	0.00646416	10.0584	38662.6	7446938	1 (1 0 0 0 0)
unnamed protein product [Homo sapiens]	0.00647749	36.0925	77123.6	10438104	5 (2 0 2 1 0)
unnamed protein product [Homo sapiens]	0.00650001	14.0918	14798.1	34534938	2 (1 0 0 1 0)
poly (ADP-ribose) glycohydrolase [Homo sapiens]	0.00650829	14.0897	111041	70610136	4 (1 1 0 1 1)
fibrinogen gamma chain (partial) (212 AA) [Homo sapiens]	0.00655962	10.0959	24109.2	930064	1 (1 0 0 0 0)
unnamed protein product [Homo sapiens]	0.00657764	10.0605	24054.6	10433044	3 (0 0 2 1 0)
unnamed protein product [Homo sapiens]	0.00667405	10.1007	19245.5	34527389	1 (1 0 0 0 0)
Zinc finger protein 132 [Homo sapiens]	0.00667492	14.0808	80571	80475035	3 (1 0 0 1 1)
frizzled 9 [Homo sapiens]	0.00673117	12.0914	64423.6	4503835	2 (1 0 0 0 1)
KIAA1301 protein [Homo sapiens]	0.00676441	34.0982	176541	7242957	6 (3 0 1 2 0)
pol protein [Human immunodeficiency virus type 1] [M	0.00676605	10.0606	36995.6	8515543	1 (1 0 0 0 0)
alpha-ketoglutarate dehydrogenase complex dihydrolipoyl succinyltransferas	0.00677283	12.1116	48619.4	632884	3 (1 1 0 1 0)
gag protein [Human immunodeficiency virus 1]	0.00677411	14.0895	55769.5	124389770	2 (1 0 0 1 0)
Gag-Pol fusion polyprotein [Human immunodeficiency virus 1]	0.00682784	26.0745	161923	31559652	4 (1 1 1 0 1)
MASP-2 protein [Homo sapiens]	0.00684342	10.0862	75636.7	5459324	1 (1 0 0 0 0)
gp160 [Human immunodeficiency virus 1]	0.0068801	16.0661	97809.1	119507945	2 (0 2 0 0 0)
P3C2G_HUMAN Phosphatidylinositol-4-phosphate 3-kinase C2 domain-containing ga	0.00688356	28.1209	165989	13632586	3 (2 1 0 0 0)
polo-like kinase 2 [Homo sapiens]	0.00688646	14.0851	78186.3	93004081	3 (2 0 0 1 0)
EHD3_HUMAN EH domain-containing protein 3	0.00690383	18.0921	61857.2	18203332	2 (1 1 0 0 0)
annexin A13 isoform b [Homo sapiens]	0.00702717	16.0793	39719.3	51896029	5 (2 3 0 0 0)
envelope glycoprotein [Human immunodeficiency virus 1]	0.00704497	8.05398	97281.8	30794657	1 (0 1 0 0 0)
hCG1645235, isoform CRA_b [Homo sapiens]	0.00707327	8.0728	26510.1	119592769	3 (0 1 2 0 0)
Protocadherin beta 7 [Homo sapiens]	0.00712158	12.0787	86697	68533589	2 (0 1 0 1 0)
envelope glycoprotein [Human immunodeficiency virus 1]	0.00714158	10.0873	44417.7	35396916	1 (1 0 0 0 0)
hCG2015072 [Homo sapiens]	0.00727986	10.0541	10763.8	119617912	1 (1 0 0 0 0)
hypothetical protein [Homo sapiens]	0.0073142	8.07323	68348.6	5912218	1 (0 1 0 0 0)
envelope glycoprotein [Human immunodeficiency virus 1]	0.00732558	8.05625	42066.4	126009666	1 (0 1 0 0 0)
reverse transcriptase [Human immunodeficiency virus 1]	0.00733138	10.0777	22171.9	67081601	1 (1 0 0 0 0)
AMPK-related protein kinase 5 [Homo sapiens]	0.00734791	6.1146	74258.8	7662170	4 (0 2 0 1 1)
CENPE_HUMAN Centromeric protein E (CENP-E)	0.00735368	72.1017	311896	399227	14 (0 3 7 2 2)
S34775 nicotinic acetylcholine receptor epsilon chain precursor - human	0.00737958	8.12325	54581.4	479584	2 (0 1 1 0 0)
envelope glycoprotein [Human immunodeficiency virus 1]	0.00739174	8.16626	97480	29119283	1 (0 1 0 0 0)
poly(rC) binding protein 4 isoform a [Homo sapiens]	0.00743807	8.05194	43841	9966803	1 (0 1 0 0 0)
polyprotein [Human coxsackievirus A5]	0.00744681	10.0988	242461	40068435	1 (1 0 0 0 0)
ribonuclease P/MRP 38 subunit [Mus musculus]	0.00747702	10.0855	31110.2	71480066	3 (0 0 1 0 2)
hCG2004074 [Homo sapiens]	0.00750934	10.0836	11026.7	119571844	2 (1 0 1 0 0)
envelope glycoprotein [Human immunodeficiency virus 1]	0.00755121	16.0646	97306.9	63014563	2 (1 0 1 0 0)
tetraspanin 32, isoform CRA_g [Homo sapiens]	0.00762235	8.06188	12810.6	119622909	1 (0 1 0 0 0)
envelope glycoprotein [Human immunodeficiency virus 1]	0.00763873	8.06792	10370.6	29422932	1 (0 1 0 0 0)
hypothetical protein PBCV1_A682L [Paramecium bursaria Chlorella virus 1	0.00764138	16.0667	39889.2	9632186	3 (0 1 0 2 0)
KIAA1060 protein [Homo sapiens]	0.00764667	12.0928	100533	5689457	2 (0 0 2 0 0)
ENV protein [Human immunodeficiency virus 1]	0.00766273	12.0845	37774.2	5738581	2 (0 1 0 1 0)
envelope glycoprotein [Human immunodeficiency virus 1]	0.00766273	10.0845	97663.2	71725959	1 (1 0 0 0 0)
pol protein [Human immunodeficiency virus 1]	0.00768992	10.0704	57121.4	116276135	1 (1 0 0 0 0)
RNA 3'-terminal phosphate cyclase-like protein [Homo sapiens]	0.00774033	10.0771	40844.6	7688192	2 (1 1 0 0 0)
OTTHUMP00000018721 [Homo sapiens]	0.00775242	10.1052	7465.82	55959283	1 (1 0 0 0 0)
reverse transcriptase [Human immunodeficiency virus type 1]	0.00776511	8.13897	64903.3	7144664	2 (0 0 1 0 1)
AF142498_1 14-3-3 gamma protein [Homo sapiens]	0.00781437	18.1217	28356.8	5726310	2 (1 1 0 0 0)
ankyrin 2 isoform 1 [Homo sapiens]	0.00783609	10.0912	433447	52426735	1 (1 0 0 0 0)
hypothetical protein [Homo sapiens]	0.00785784	16.0805	185662	21739912	2 (1 0 1 0 0)
malignant T cell amplified sequence 1 [Homo sapiens]	0.00791369	40.0726	20541.8	7662502	6 (3 0 1 0 2)
Chain , Cdc42 From Human, Nmr, 20 Structures	0.00797078	8.0493	21473.2	2624582	1 (0 1 0 0 0)
envelope glycoprotein [Human immunodeficiency virus 1]	0.00797088	10.0691	24369.1	14336316	1 (1 0 0 0 0)
DNJC4_HUMAN DnaJ homolog subfamily C member 4 (Multiple endocrine neoplasia t	0.00799966	8.06741	27576.2	18203312	1 (0 1 0 0 0)
envelope glycoprotein [Human immunodeficiency virus 1]	0.0080047	16.061	102587	83699691	2 (0 2 0 0 0)
UL120 [Human herpesvirus 5 strain Merlin]	0.00805667	8.13029	23119.5	52139284	8 (0 5 1 2 0)
AF166172_1 polyprotein [Human coxsackievirus A9]	0.00809564	8.13589	14943.1	6752467	8 (1 4 2 1 0)
TRPA1_HUMAN Transient receptor potential cation channel subfamily A member 1	0.00810281	42.0864	127296	56749685	8 (1 1 2 2 2)
envelope glycoprotein [Human immunodeficiency virus 1]	0.00811102	10.0606	11347.1	29838248	1 (1 0 0 0 0)
collagen type IX alpha I chain, short form [Homo sapiens]	0.00812792	8.06751	64355.6	3510536	1 (0 1 0 0 0)
AF286553_1 envelope glycoprotein V3 region [Human immunodeficiency virus t	0.00814344	8.06444	12920	9885701	1 (0 1 0 0 0)
aldehyde dehydrogenase 6A1 precursor [Homo sapiens]	0.00814995	16.0789	57802.8	11095441	2 (0 2 0 0 0)
hCG2036598, isoform CRA_a [Homo sapiens]	0.00817849	8.1024	216583	119588218	2 (0 0 1 0 1)
GPR98_HUMAN G-protein coupled receptor 98 precursor (Monogenic audiogenic sei	0.00820325	34.1072	692247	74716281	4 (3 0 0 1 0)
2'-5' oligoadenylate binding protein; endoribonuclease [Homo sapiens] [MA	0.00822355	16.0643	45534.6	608723	2 (1 0 1 0 0)
unnamed protein product [Homo sapiens]	0.00825156	14.0657	114092	10434608	2 (0 1 1 0 0)
mitochondrial NADH-Ubiquinone oxidoreductase 10-kDa subunit [Homo sapien	0.00834484	10.1605	11933.1	6002197	1 (1 0 0 0 0)
ATPase, Ca++ transporting, cardiac muscle, slow twitch 2 isoform 1 [Ho	0.00835943	18.1444	114683	24638454	4 (1 0 0 1 2)
FLJ00226 protein [Homo sapiens]	0.00838215	32.1149	116625	18676654	4 (2 1 0 1 0)
hypothetical protein [Homo sapiens]	0.00838435	12.1278	73052	21734051	7 (3 1 0 0 3)
envelope glycoprotein [Human immunodeficiency virus 1]	0.00846111	10.1001	7956.14	54301218	1 (1 0 0 0 0)
hypothetical protein LOC555788 [Danio rerio]	0.00849452	10.078	117756	71834354	2 (1 0 1 0 0)
telomeric repeat binding factor 2, interacting protein [Homo sapiens]	0.00849546	10.0683	44232.9	52627149	3 (1 1 0 0 1)
GTPase, IMAP family member 7 [Homo sapiens]	0.00850243	12.109	34486.8	23397516	2 (1 0 0 0 1)
KIAA0964 protein [Homo sapiens]	0.00851421	12.0952	108477	40789001	2 (1 0 0 0 1)
Tat [Human immunodeficiency virus 1]	0.00866648	2.07339	11767.8	114431139	3 (0 1 0 0 2)
GUC1C_HUMAN Guanylyl cyclase-activating protein 3 (GCAP 3) (Guanylate cyclase	0.00870175	16.091	23806.8	6226818	2 (1 0 1 0 0)
zinc finger protein 445 [Homo sapiens]	0.00872785	26.0903	118887	31340735	5 (1 1 1 1 1)
envelope glycoprotein, c2v3 region [Human immunodeficiency virus type 1] [	0.00873088	10.0514	10394.4	478966	1 (1 0 0 0 0)
hCG2023911 [Homo sapiens]	0.00874765	10.0848	66346.3	119608334	1 (1 0 0 0 0)
D Chain D, Crystal Structure Of Staphylococcal Enterotoxin I (Sei) In Complex	0.00877658	10.0671	24911.6	112490707	2 (1 0 0 1 0)
transmembrane protein 30B [Homo sapiens]	0.00879727	10.1162	38916.4	63003930	2 (1 0 1 0 0)
hCG1652025 [Homo sapiens]	0.00881375	18.0571	17837.3	119611627	39 (24 7 4 4 0)
A42177 KRAB-domain-containing zinc finger protein ZNF45 - human (fragment)	0.00883254	22.1102	46301.6	284284	9 (2 5 1 1 0)
RPKL1_HUMAN Ribosomal protein S6 kinase-like 1	0.00885084	16.0759	59998.6	74762793	3 (0 0 2 1 0)
ubiquitin-like domain containing CTD phosphatase 1 [Homo sapiens]	0.00886533	12.0917	36709.2	21450802	2 (1 0 0 0 1)
gp120 protein [Human immunodeficiency virus 1] [MA	0.00886866	8.06808	23305.4	27848311	1 (0 1 0 0 0)
AF477054_1 envelope glycoprotein [Human immunodeficiency virus type 1] [M	0.00888339	2.10526	20728.6	21069247	7 (1 3 0 0 3)
immunoglobulin heavy chain variable region [Homo sapiens]	0.00892218	10.0719	13678.6	118406185	1 (1 0 0 0 0)
GNAS complex locus isoform f [Homo sapiens]	0.00899773	12.1497	45723	117938762	2 (1 0 0 0 1)
K1 glycoprotein [Human herpesvirus 8]	0.00908493	10.1229	19810.7	83755270	2 (0 1 0 0 1)
nesprin-2 [Homo sapiens]	0.00910887	42.1087	795782	24417711	11 (0 4 3 2 2)
envelope glycoprotein [Human immunodeficiency virus type 1]	0.00916495	8.16053	96768.6	17046569	9 (1 2 2 2 2)
unnamed protein product [Homo sapiens]	0.00916688	10.0672	15416.9	21756897	1 (1 0 0 0 0)
killer cell immunoglobulin-like receptor, three domains, long cytopla	0.00919432	8.04237	50198.3	134268642	1 (0 1 0 0 0)
unnamed protein product [Homo sapiens]	0.00921537	4.06062	87811.7	21756817	2 (1 0 0 1 0)
truncated env protein [Human immunodeficiency virus type 1]	0.00922367	16.0714	66740.8	6643031	3 (0 1 0 2 0)
Tubulin, beta [Homo sapiens]	0.00924442	10.1793	49640	18088719	6 (4 2 0 0 0)
HELZ_HUMAN Probable helicase with zinc-finger domain [MAS	0.00926353	14.1042	218832	1177024	8 (0 4 4 0 0)
unnamed protein product [Homo sapiens]	0.00926786	10.0746	25215.2	28193116	1 (1 0 0 0 0)
estrogen-responsive B box protein [Homo sapiens] [MA	0.00928372	10.0529	63926.6	3916727	1 (1 0 0 0 0)
major histocompatibility complex, class I, C precursor [Homo sapiens]	0.00928421	10.0762	40623	52630342	1 (1 0 0 0 0)
gag protein [Human immunodeficiency virus 1]	0.00938353	18.1068	19216.7	118139413	2 (1 1 0 0 0)
protease [Human immunodeficiency virus 1]	0.00939579	16.053	10815.9	4375888	2 (1 0 1 0 0)
gag protein [Human immunodeficiency virus 1]	0.00941214	16.0547	54193.9	124389792	2 (0 2 0 0 0)
A Chain A, The Yeast Actin Val 159 Asn Mutant Complex With Human Gelsolin Segme	0.00952854	20.1085	41677.8	7546413	5 (0 2 0 3 0)
APG7 autophagy 7-like [Homo sapiens]	0.00953026	16.0781	77909.4	5453668	3 (0 1 1 0 1)
unnamed protein product [Homo sapiens]	0.00955018	10.0628	19150.6	21755889	3 (2 1 0 0 0)
ACACA protein [Homo sapiens]	0.00955259	8.09631	78222.1	32425437	1 (0 1 0 0 0)
G protein-coupled receptor 162 isoform 2 [Homo sapiens]	0.00958362	12.0765	63889.8	9951913	2 (0 1 0 1 0)
unnamed protein product [Homo sapiens]	0.00960169	14.0777	45410.2	7022746	2 (0 1 1 0 0)
IVa2 [Human adenovirus F]	0.00963244	32.0847	51089.3	9626558	7 (1 2 1 0 3)
KIAA1566 protein [Homo sapiens]	0.00966242	10.05	142919	10047197	2 (0 0 1 1 0)
envelope glycoprotein [Human immunodeficiency virus 1]	0.00967315	8.13726	21975.9	31873058	10 (2 4 2 1 1)
unnamed protein product [Homo sapiens]	0.00970568	12.0488	49575.3	21758964	3 (0 0 3 0 0)
FLJ00152 protein [Homo sapiens]	0.00973603	24.0556	155496	18676510	4 (1 0 2 0 1)
hypothetical protein LOC54987 [Homo sapiens]	0.00974023	14.07	18036.8	8923541	2 (0 1 1 0 0)
carbohydrate (N-acetylglucosamine 6-O) sulfotransferase 4 [Homo sapiens	0.00975824	10.0594	45104.1	5031735	1 (1 0 0 0 0)
envelope glycoprotein [Human immunodeficiency virus 1]	0.00977584	10.1028	10845.7	27801855	5 (3 1 0 1 0)
AF397424_1 C7ORF12 [Homo sapiens]	0.00978213	18.1033	91619.9	15987887	3 (1 0 1 0 1)
fas ligand [Homo sapiens]	0.0097903	14.0651	31464.1	4557329	2 (0 1 1 0 0)
KIAA0250 [Homo sapiens]	0.00979666	10.0649	125772	20521860	1 (1 0 0 0 0)
exterior membrane protein gp120 [Human immunodeficiency virus 1]	0.00979845	8.08677	37847	7258468	1 (0 1 0 0 0)
NAD+-specific isocitrate dehydrogenase beta precursor [Homo sapiens] [MAS	0.00982167	6.03608	42184.7	2737886	2 (0 0 0 1 1)
AF383245_1 envelope glycoprotein [Human immunodeficiency virus type 1] [M	0.00982622	18.0828	99305.6	19773771	2 (1 1 0 0 0)
unnamed protein product [Homo sapiens]	0.00983282	16.0481	47432.8	22761255	2 (1 0 1 0 0)
phosphoribosylaminoimidazole carboxylase, phosphoribosylaminoimidazole	0.00986904	10.0622	47049.2	5453539	1 (1 0 0 0 0)
envelope glycoprotein [Human immunodeficiency virus type 1]	0.00989529	10.1472	10205.5	2641541	1 (1 0 0 0 0)
phenylalanyl-tRNA synthetase, alpha subunit [Homo sapiens]	0.00990701	8.07267	57527.6	4758340	2 (0 0 1 0 1)
KIAA1760 protein [Homo sapiens]	0.00993563	8.04507	234325	29421208	1 (0 1 0 0 0)
AF204653_1 envelope glycoprotein [Human immunodeficiency virus type 1] [MA	0.00993662	10.0559	22890.5	6540554	1 (1 0 0 0 0)
pol protein [Human immunodeficiency virus 1]	0.00996094	8.07615	23164.1	23306628	1 (0 1 0 0 0)
unnamed protein product [Homo sapiens]	0.0099808	16.0422	44730.8	10437296	2 (1 0 1 0 0)
F-box protein 47 [Homo sapiens]	56912189	2 (0 0 0 1 1)
gp105 [Human immunodeficiency virus 2]	12697394	2 (0 0 0 1 1)
immunoglobulin heavy chain [Homo sapiens]	29837007	2 (0 0 0 1 1)
unnamed protein product [Homo sapiens]	7020351	2 (0 1 1 0 0)
AF474991_1 G protein-coupled receptor SNSR5 [Homo sapiens]	19338916	2 (0 0 0 1 1)
polo-like kinase [Homo sapiens]	21359873	2 (1 0 1 0 0)
mitochondrial ribosomal protein S15 [Homo sapiens]	16554611	2 (0 0 0 1 1)
polyprotein [Human calicivirus strain Mc37]	44829135	2 (0 0 0 1 1)
glutamate decarboxylase-like 1 [Homo sapiens]	46409350	2 (0 0 0 1 1)
sphingosine kinase 2 [Homo sapiens]	21361699	2 (0 0 0 1 1)
envelope glycoprotein [Human immunodeficiency virus 1]	28916314	2 (0 0 0 0 2)
Polyadenylate binding protein, human types 1, 2, 3, 4 [Medicago truncatu	92877413	2 (0 0 0 0 2)
G protein-coupled receptor kinase 4, isoform CRA_d [Homo sapiens]	119602888	2 (0 0 0 0 2)
PDZ domain containing RING finger 3 [Homo sapiens]	57529737	2 (0 0 0 0 2)
envelope glycoprotein gp120 [Human immunodeficiency virus 1]	85663155	2 (0 0 0 0 2)
mitochondrial ribosomal protein S6 [Homo sapiens]	13620885	2 (0 0 0 0 2)
pol protein [Human immunodeficiency virus 1]	42717862	2 (0 0 0 0 2)
vif [Human immunodeficiency virus 1]	3287159	2 (1 0 0 0 1)
envelope glycoprotein [Human immunodeficiency virus type 1]	7208032	2 (0 1 0 0 1)
hCG41809 [Homo sapiens]	119569936	2 (0 1 0 0 1)
