# Supplementary material for: ER stress induced immunopathology involving complement in CADASIL: implications for therapeutics
Source: Acta Neuropathol Commun. 2023 May 8;11:76. doi: 10.1186/s40478-023-01558-1 (PMC10169505; doi:10.1186/s40478-023-01558-1)
Supplement: Supplementary file 7 — Supplementary Material 7 [file 40478_2023_1558_MOESM7_ESM.xlsx]

## Sheet: CADASIL_1_FA
ER Stress Induced Immunopathology involving Complement in CADASIL: Implications for Therapeutics
Mahmod Panahi, Yoshiki Hase, Xavier Gallart-Palau, Sumonto Mitra, Atsushi Watanabe, Roger C Low, Yumi Yamamoto, Diego Sepulveda-Falla, Atticus H Hainsworth, Masafumi Ihara, Siu Kwan Sze, Matti Viitanen, Homira Behbahani, Raj N Kalaria
Supplementary information
Supplementary dataset 5: List of total proteins identified by LC-MS/MS in FA fractions of CADASIL subjects. Each tab referes to the total proteins identified in each individual.
Description	P-value	Score	MW	Accession	Peptide (Hits)
2',3'-cyclic-nucleotide 3'-phosphodiesterase (EC 3.1.4.37)	1.05203e-09	164.217	45070.4	180687	29 (19 6 4 0 0)
ferritin, heavy polypeptide 1 [Homo sapiens]	5.56888e-12	124.271	21212.3	56682959	37 (32 4 0 0 1)
I38369 beta-tubulin - human	1.12524e-13	88.3181	48848.5	2119276	17 (15 1 0 0 1)
tubulin, beta 4 [Homo sapiens]	6.10433e-08	80.1828	49553.9	21361322	12 (8 2 1 0 1)
glial fibrillary acidic protein [Homo sapiens]	4.98138e-08	76.1272	49849.7	4503979	8 (7 0 1 0 0)
myelin basic protein isoform 1 [Homo sapiens]	2.28558e-07	64.187	21480	68509930	25 (16 4 1 2 2)
brain creatine kinase [Homo sapiens]	5.69071e-08	50.1695	42617.4	21536286	7 (7 0 0 0 0)
proteolipid protein [Rattus norvegicus]	1.16281e-05	50.1423	30057.1	13591880	10 (10 0 0 0 0)
microtubule-associated protein 1B isoform 1 [Homo sapiens]	0.00920419	46.0616	270452	5174525	6 (3 1 0 2 0)
histone H2B [Homo sapiens]	8.29202e-10	40.2304	13927.6	1568557	9 (8 0 0 0 1)
ferritin, light polypeptide [Homo sapiens]	1.51739e-09	40.2061	20007.1	20149498	6 (6 0 0 0 0)
H4 histone family, member A [Homo sapiens]	3.20241e-06	40.1452	11360.4	4504301	5 (5 0 0 0 0)
tubulin alpha 6 [Homo sapiens]	6.53977e-06	40.1294	49863.5	14389309	7 (7 0 0 0 0)
ATP synthase, H+ transporting, mitochondrial F1 complex, alpha subunit	5.35649e-05	38.1026	59713.7	4757810	5 (4 1 0 0 0)
histone cluster 1, H1d [Homo sapiens]	5.08851e-09	34.1914	22336.3	4885377	8 (6 0 0 2 0)
H2A histone family, member A [Homo sapiens]	3.44608e-06	30.1635	14127	10645195	7 (7 0 0 0 0)
tubulin, alpha-like 3 [Homo sapiens]	0.00585393	30.0998	49876.8	13376181	4 (3 1 0 0 0)
neurofilament, medium polypeptide 150kDa [Homo sapiens]	0.000341366	30.0997	102386	4885513	4 (2 0 1 1 0)
dihydropyrimidinase-like 2 [Homo sapiens]	0.00107126	28.1305	62254.7	4503377	3 (2 1 0 0 0)
SMCR8 protein [Homo sapiens]	0.00364485	28.1147	93102.4	73487288	4 (2 1 1 0 0)
JN0902 pituitary adenylate cyclase activating peptide receptor type I precursor - hu	0.0045978	28.0712	59263.5	542976	4 (2 1 0 1 0)
desmoglein 2 [Homo sapiens]	0.00382957	24.0627	122309	416178	5 (3 1 1 0 0)
tubulin, beta 2 [Homo sapiens]	0.000112068	22.1165	49875	4507729	5 (3 0 2 0 0)
neurolysin [Homo sapiens]	0.00385012	22.1051	80599.8	14149738	7 (2 1 2 0 2)
wingless-type MMTV integration site family, member 4 precursor [Homo s	0.00898613	22.0782	39026.2	17402922	4 (0 2 2 0 0)
H1 histone family, member 0 [Homo sapiens]	2.33574e-08	20.181	20850.2	4885371	6 (4 2 0 0 0)
microtubule-associated protein 2 [Homo sapiens]	1.3484e-05	20.1596	199045	1850617	2 (2 0 0 0 0)
histone cluster 1, H1a [Homo sapiens]	1.09973e-06	20.1544	21828.9	4885373	2 (2 0 0 0 0)
neurofilament, light polypeptide 68kDa [Homo sapiens]	0.00124729	20.1517	61479.3	105990539	2 (2 0 0 0 0)
ribosomal protein L23a [Homo sapiens]	4.45051e-05	20.1342	17684.1	17105394	3 (3 0 0 0 0)
brain abundant, membrane attached signal protein 1 [Homo sapiens]	0.000234181	20.0914	22680	30795231	2 (2 0 0 0 0)
ataxia telangiectasia mutated homolog [Mus musculus]	0.007695	20.082	349262	6680740	3 (1 1 0 0 1)
E1B 55K [Human adenovirus E]	0.00251735	18.0919	54170.1	51527267	2 (1 1 0 0 0)
env protein [Human immunodeficiency virus type 1] [MA	0.00555348	18.0848	98089.4	328649	4 (1 0 0 1 2)
human WRN (Werner's syndrome) related family member (wrn-1) [Caenorhab	0.000744783	18.069	118448	32564293	2 (1 1 0 0 0)
hCG2029263 [Homo sapiens]	0.00859473	18.0583	13941.2	119601375	2 (1 1 0 0 0)
Bloom syndrome protein [Homo sapiens]	0.00946087	18.0443	158900	4557365	2 (1 1 0 0 0)
ribosomal protein L27 [Homo sapiens]	3.29632e-05	16.1051	15787.8	4506623	2 (1 0 1 0 0)
pol protein [Human T-lymphotropic virus 3]	0.00396165	16.0836	24392.7	62240428	4 (1 0 2 1 0)
ubiquitin and ribosomal protein S27a precursor [Homo sapiens]	0.000394835	16.0832	17953.5	4506713	2 (1 0 1 0 0)
unnamed protein product [Homo sapiens]	0.00206845	16.0781	99663.2	34533391	2 (0 2 0 0 0)
immunoglobulin heavy chain [Homo sapiens]	0.00538838	16.0739	15979	46253861	2 (1 0 1 0 0)
hypothetical protein [Homo sapiens]	0.00518482	16.0652	64650.4	6453438	2 (0 2 0 0 0)
serologically defined colon cancer antigen 1 [Homo sapiens]	0.00504183	16.0584	122894	32130516	2 (1 0 1 0 0)
hCG1647812 [Homo sapiens]	0.0046261	16.0493	8946.37	119626276	2 (1 0 1 0 0)
unnamed protein product [Homo sapiens]	0.00619354	14.0824	42228.2	7022606	4 (0 1 1 1 1)
skeletal muscle ryanodine receptor isoform 1 [Homo sapiens]	0.00489006	14.0521	564814	113204615	2 (0 1 1 0 0)
HECT type E3 ubiquitin ligase [Homo sapiens]	0.00537298	12.1171	177056	51094760	4 (0 1 1 2 0)
FLJ00310 protein [Homo sapiens]	0.000227884	12.0922	34481.4	21748512	2 (1 0 0 0 1)
UTP20_HUMAN Small subunit processome component 20 homolog (Down-regulated in	0.000525928	12.0589	318221	62510570	3 (0 0 0 3 0)
synaptosomal-associated protein, 25kDa [Homo sapiens]	0.000108379	10.1566	10676	24740601	1 (1 0 0 0 0)
KIAA1708 [Homo sapiens]	4.18683e-07	10.1555	185022	30725047	1 (1 0 0 0 0)
A Chain A, Crystal Structure Of A DictyosteliumTETRAHYMENA CHIMERA Actin (Mutan	0.00019557	10.1542	41719.9	7245526	2 (2 0 0 0 0)
envelope glycoprotein [Human immunodeficiency virus type 1]	0.00887696	10.1533	96768.6	17046569	2 (1 0 0 1 0)
myelin basic protein isoform 4 [Homo sapiens]	9.16386e-05	10.1363	17332.8	68509932	2 (2 0 0 0 0)
tubulin, alpha 1B [Mus musculus]	9.2198e-06	10.1354	50119.6	34740335	1 (1 0 0 0 0)
calcium/calmodulin-dependent protein kinase II gamma isoform 1 [Mus mu	1.08703e-08	10.1304	59569.4	75991700	1 (1 0 0 0 0)
sine oculis homeobox homolog 6 [Homo sapiens]	0.00472554	10.13	27647.3	6677979	3 (1 1 0 0 1)
cytochrome c oxidase subunit VIb [Homo sapiens]	0.000105865	10.1261	10185.7	4502985	1 (1 0 0 0 0)
AF154671_1 CRB1 [Homo sapiens]	8.68302e-05	10.1145	151312	6014482	1 (1 0 0 0 0)
KIAA1212 protein [Homo sapiens]	0.00157244	10.1105	90241.8	20521794	2 (1 0 0 1 0)
lipin 3 [Homo sapiens]	0.00200001	10.1093	93556.5	74271888	2 (0 1 0 0 1)
splicing factor, arginine/serine-rich 2 [Mus musculus]	5.52858e-05	10.1073	25461.2	6755478	1 (1 0 0 0 0)
unnamed protein product [Homo sapiens]	0.0003225	10.1072	58352.6	16552759	1 (1 0 0 0 0)
PSD3_HUMAN PH and SEC7 domain-containing protein 3 (Pleckstrin homology and S	0.00690754	10.1049	60155.8	42560198	1 (1 0 0 0 0)
similar to 60S ribosomal protein L17 (L23) (Amino acid starvation-induce	0.00250648	10.1042	11895.2	51094799	1 (1 0 0 0 0)
unnamed protein product [Homo sapiens]	0.000158558	10.1041	49811	10433717	1 (1 0 0 0 0)
glycoprotein B [Human herpesvirus 6B]	0.00539517	10.1037	93077.2	4996027	1 (1 0 0 0 0)
A45036 single-stranded-DNA-binding protein Pur alpha - human [MA	1.46624e-05	10.1034	34948.5	346338	1 (1 0 0 0 0)
establishment of cohesion 1 homolog 2 [Homo sapiens]	0.00391397	10.1029	68264.2	62899035	1 (1 0 0 0 0)
H2A histone family member [Homo sapiens]	0.000881812	10.1024	13897.8	18105045	1 (1 0 0 0 0)
voltage-dependent anion channel 1 [Homo sapiens]	0.000670867	10.0978	30753.6	4507879	1 (1 0 0 0 0)
cytochrome b5 reductase isoform 1 [Homo sapiens]	0.00822063	10.0972	34212.7	4503327	1 (1 0 0 0 0)
KIAA1956 protein [Homo sapiens]	0.00398681	10.0937	78190.1	18916783	1 (1 0 0 0 0)
Chain , Ferritin (H-Chain) Mutant (Lys 86 Replaced By Gln) (K86q)	0.00471951	10.0913	21212.3	229918	1 (1 0 0 0 0)
reverse transcriptase [Human immunodeficiency virus 1]	0.0034466	10.0896	24403	121585490	1 (1 0 0 0 0)
novel protein similar to human serine\/threonine kinase 35 (STK35) [Dan	0.000538522	10.0853	40015.4	55962341	1 (1 0 0 0 0)
solute carrier family 17 (sodium-dependent inorganic phosphate cotr	2.07755e-05	10.0846	55962.2	53292617	1 (1 0 0 0 0)
KIAA1345 protein [Homo sapiens]	0.0039296	10.084	175742	7243071	1 (1 0 0 0 0)
PARP4_HUMAN Poly [ADP-ribose] polymerase 4 (PARP-4) (Vault poly(ADP-ribose) p	0.00929269	10.083	192465	17380231	1 (1 0 0 0 0)
envelope glycoprotein [Human immunodeficiency virus 2]	0.00237812	10.0825	14703.5	59797415	1 (1 0 0 0 0)
LAMA3 protein [Homo sapiens]	0.00520894	10.0808	63934.6	62203479	1 (1 0 0 0 0)
unnamed protein product [Homo sapiens]	0.00439944	10.0796	23501.2	7021867	1 (1 0 0 0 0)
adenylate cyclase 6 isoform a [Homo sapiens]	0.00941458	10.0788	130531	10181096	1 (1 0 0 0 0)
beta tubulin 1, class VI [Homo sapiens]	0.000584663	10.0787	50294.6	13562114	2 (0 1 0 0 1)
ataxia telangiectasia mutated (includes complementation groups A, C and	0.00345725	10.0777	187986	119587513	1 (1 0 0 0 0)
pol protein [Human immunodeficiency virus 1]	0.00252789	10.0758	46576.1	14289657	1 (1 0 0 0 0)
hypothetical protein [Homo sapiens]	0.0006862	10.0735	17173.7	21739532	1 (1 0 0 0 0)
piwi-like 3 [Homo sapiens]	0.00534557	10.0726	101058	56606068	2 (0 0 1 1 0)
eukaryotic translation elongation factor 1 alpha 1 [Homo sapiens]	0.00054986	10.0724	50109.2	4503471	1 (1 0 0 0 0)
putative [Homo sapiens]	0.00114115	10.0721	2212.17	553734	4 (2 1 0 1 0)
similar to t-complex 1; T-complex locus TCP-1; t-complex 1 (a murine tcp	0.00293362	10.0721	19812.7	51094756	4 (1 1 0 1 1)
prefoldin subunit 5, isoform CRA_b [Homo sapiens]	0.002064	10.0721	9605.95	119617090	1 (1 0 0 0 0)
cysteine protease [Homo sapiens]	0.000403996	10.0721	49351.4	1890050	1 (1 0 0 0 0)
reverse transcriptase [Human immunodeficiency virus 1]	0.0037516	10.0718	22563.8	67080330	1 (1 0 0 0 0)
prosaposin isoform a preproprotein [Homo sapiens]	0.00169136	10.0715	58073.9	11386147	1 (1 0 0 0 0)
TBB4Q_HUMAN Tubulin beta-4q chain	0.00235629	10.0712	48403.5	12643363	1 (1 0 0 0 0)
KIAA1267 protein [Homo sapiens]	0.007277	10.0701	120908	6331206	2 (2 0 0 0 0)
frizzled 1 [Homo sapiens]	0.00183455	10.0691	71111.9	4503825	1 (1 0 0 0 0)
CASK interacting protein 1 [Homo sapiens]	0.00268299	10.0673	149721	18079216	1 (1 0 0 0 0)
interleukin-1 receptor-associated kinase 1 isoform 1 [Homo sapiens]	0.0050174	10.0663	76488.7	68800243	1 (1 0 0 0 0)
syntaxin binding protein 5 (tomosyn) [Homo sapiens]	0.00590655	10.0663	29107	57162297	1 (1 0 0 0 0)
immunoglobulin heavy chain variable region [Homo sapiens]	0.00530781	10.0632	12568.1	114386257	1 (1 0 0 0 0)
gag protein [Human immunodeficiency virus 1]	0.00480452	10.0625	16661.2	118426886	1 (1 0 0 0 0)
envelope glycoprotein [Human immunodeficiency virus 1]	0.00588181	10.0618	18062.1	8489362	1 (1 0 0 0 0)
capsid protein precursor [Human astrovirus]	0.000118456	10.0616	11231.4	1617058	1 (1 0 0 0 0)
Williams-Beuren syndrome chromosome region 17, isoform CRA_b [Homo sapi	0.00660212	10.0608	28960.5	119628303	2 (1 0 0 1 0)
PT0369 Ig gamma chain precursor V region (gamma F9) - human (fragment)	0.00843503	10.0607	13974.8	87789	1 (1 0 0 0 0)
tuberoinfundibular 39 residue protein precursor [Homo sapiens]	0.00876623	10.0595	11195.3	30425368	2 (1 0 0 0 1)
chromosome 1 open reading frame 34 [Homo sapiens]	0.00576053	10.0567	63139.9	55958002	1 (1 0 0 0 0)
similar to GenBank Accession Number BC018733 CGI-27 protein in Homo sapi	0.00588308	10.0555	33824.8	29841028	1 (1 0 0 0 0)
IKIP protein [Homo sapiens]	0.00789806	10.0541	30349.5	77748093	1 (1 0 0 0 0)
rad and gem related GTP binding protein 1 [Danio rerio]	0.000163071	10.054	33854.2	54633305	1 (1 0 0 0 0)
glucosamine-6-phosphate deaminase 2 [Homo sapiens]	0.00326614	10.0536	31064.6	19923881	2 (0 0 1 1 0)
unknown [Homo sapiens]	0.00387916	10.0534	64886.9	62630119	1 (1 0 0 0 0)
envelope glycoprotein [Human immunodeficiency virus 1]	0.00381881	10.053	12813.2	118427012	1 (1 0 0 0 0)
hCG1641337, isoform CRA_b [Homo sapiens]	0.00122656	10.0518	48241.7	119582782	1 (1 0 0 0 0)
hypothetical protein LOC644815 [Homo sapiens]	0.00842708	10.0513	90778.9	115392150	1 (1 0 0 0 0)
unnamed protein product [Homo sapiens]	0.000871274	10.0496	16613.2	34526077	1 (1 0 0 0 0)
arginyl-tRNA synthetase [Homo sapiens]	0.00942951	10.0488	75331	15149476	1 (1 0 0 0 0)
uromodulin precursor [Homo sapiens]	0.00626614	10.0487	69714.5	56550049	1 (1 0 0 0 0)
fatty acid binding protein 4, adipocyte [Homo sapiens]	0.000415348	10.0458	14709.5	4557579	1 (1 0 0 0 0)
hypothetical protein [Homo sapiens]	0.00562032	10.0453	4287.12	57997040	1 (1 0 0 0 0)
DPYD_HUMAN Dihydropyrimidine dehydrogenase [NADP+] precursor (DPD) (DHPDHase)	0.000169901	10.0452	111302	2498310	1 (1 0 0 0 0)
TGM4_HUMAN Protein-glutamine gamma-glutamyltransferase 4 (Transglutaminase-4)	0.00583099	10.0422	77096.1	3915892	1 (1 0 0 0 0)
AF071882_1 esophageal cancer susceptibility protein [Homo sapiens]	0.0075022	10.0363	44284.9	5281112	1 (1 0 0 0 0)
transportin 1 isoform 2 [Homo sapiens]	0.00273451	8.13512	101244	23510381	1 (0 1 0 0 0)
hCG2007338, isoform CRA_b [Homo sapiens]	0.000287641	8.13053	33626.2	119631874	1 (0 1 0 0 0)
envelope glycoprotein [Human immunodeficiency virus 1]	0.00677686	8.11803	31845	99029604	9 (3 2 2 1 1)
immunoglobulin light chain variable region [Homo sapiens]	0.00363299	8.11244	11695.8	66096638	3 (2 1 0 0 0)
zinc finger protein 699 [Homo sapiens]	0.0034774	8.10293	73907.3	110626177	1 (0 1 0 0 0)
AF427122_1 capsid protein [Human calicivirus NLV/Berlin/491/00/DE]	0.001308	8.10239	58908.5	16417852	1 (0 1 0 0 0)
AF175078_1 envelope glycoprotein [Human immunodeficiency virus type 1] [MA	0.00341326	8.09675	9228.56	6003400	1 (0 1 0 0 0)
ATAD2 protein [Homo sapiens]	0.0037808	8.0962	81226.7	46255667	1 (0 1 0 0 0)
FAM92A1 protein [Homo sapiens]	0.0058964	8.09571	35734.4	71052121	2 (0 1 0 1 0)
C17orf57 protein [Homo sapiens]	0.00352104	8.08745	59798.6	71297091	1 (0 1 0 0 0)
envelope glycoprotein [Human immunodeficiency virus type 1]	0.00914092	8.0867	41870.3	2290025	1 (0 1 0 0 0)
pol protein [Human immunodeficiency virus 1]	0.00394186	8.08622	57145.4	42717540	1 (0 1 0 0 0)
hypothetical protein LOC440757 [Homo sapiens]	0.00182003	8.08401	18272.9	51972266	1 (0 1 0 0 0)
AF484961_1 PINCH-2 [Homo sapiens]	0.00439944	8.0788	38890.6	22478876	1 (0 1 0 0 0)
hCG2036644 [Homo sapiens]	0.00540031	8.07874	16455.7	119588656	1 (0 1 0 0 0)
KIAA1210 protein [Homo sapiens]	0.00120515	8.07296	122336	6330529	2 (0 0 1 0 1)
reverse transcriptase [Human immunodeficiency virus 1]	0.00269156	8.0682	34726.4	55706490	1 (0 1 0 0 0)
TGF-beta-activated kinase like [Homo sapiens]	0.00403049	8.06685	22382.2	7717312	2 (0 1 0 1 0)
env C2-V3-C2 [Human immunodeficiency virus 1] [MAS	0.00366469	8.06484	10704.6	62086942	1 (0 1 0 0 0)
histone H1 variant [Homo sapiens]	0.00611534	8.06454	25873.1	44953495	1 (0 1 0 0 0)
valyl-tRNA synthetase [Homo sapiens]	0.00593917	8.06428	140387	5454158	1 (0 1 0 0 0)
reverse transcriptase [Human immunodeficiency virus 1]	0.00898112	8.06406	22372.4	67082293	3 (0 3 0 0 0)
unnamed protein product [Homo sapiens]	0.00790625	8.06294	20813.5	10439166	1 (0 1 0 0 0)
unnamed protein product [Homo sapiens]	0.00255145	8.06286	65308.7	21751426	1 (0 1 0 0 0)
mitochondrial ribosomal protein S15 [Homo sapiens]	0.00725472	8.06273	29823.5	16554611	1 (0 1 0 0 0)
proteasome alpha 3 subunit isoform 1 [Homo sapiens]	0.00215895	8.0601	28415.1	4506183	1 (0 1 0 0 0)
gag protein [Human immunodeficiency virus 1]	0.00115045	8.05819	16535.5	68137241	1 (0 1 0 0 0)
AF138344_1 envelope glycoprotein [Human immunodeficiency virus type 1] [MA	0.00161429	8.05666	22817.4	6958592	1 (0 1 0 0 0)
hCG1643702 [Homo sapiens]	0.00689447	8.05557	5544.88	119598966	1 (0 1 0 0 0)
tenascin-X precursor [Homo sapiens]	0.00836714	8.05449	78381	394780	2 (0 0 0 2 0)
immunoglobulin alpha heavy chain variable region [Homo sapiens]	0.00729742	8.05335	17120.3	62871090	1 (0 1 0 0 0)
envelope glycoprotein [Human immunodeficiency virus type 1]	0.00440653	8.05286	27123.7	1845649	1 (0 1 0 0 0)
orthologue of H. sapiens chromosome 20 open reading frame 43 (C20orf43	0.00445118	8.05134	33509	147223366	1 (0 1 0 0 0)
envelope glycoprotein [Simian-Human immunodeficiency virus]	0.000793682	8.0512	15690.3	3514026	1 (0 1 0 0 0)
argininosuccinate synthetase, isoform CRA_b [Homo sapiens]	0.00318881	8.04969	50732.1	119608339	11 (5 2 1 2 1)
vif protein [Human immunodeficiency virus 1]	0.00796476	8.04855	22645.9	73913845	1 (0 1 0 0 0)
envelope glycoprotein [Human immunodeficiency virus 1]	0.00333252	8.04807	18867.5	62824023	1 (0 1 0 0 0)
DiGeorge syndrome critical region protein 6 [Homo sapiens]	0.00297922	8.04466	24973.1	15208654	1 (0 1 0 0 0)
PH0268 epidermal autoantigen 450K (clone pE450-C/D) - human (fragment)	0.00911077	8.04408	73217.9	1082356	1 (0 1 0 0 0)
novel protein similar to human general transcription factor IIIC, poly	0.00791931	8.03961	72634.8	123233005	1 (0 1 0 0 0)
unnamed protein product [Homo sapiens]	0.001423	8.03069	20782.6	34533426	1 (0 1 0 0 0)
zinc finger protein 234 [Homo sapiens]	0.00452744	6.04627	80507.1	24307913	2 (0 0 0 1 1)
UL56 [Human herpesvirus 5 strain AD169]	0.00628184	6.04092	95807.7	9625741	2 (0 0 0 1 1)
pol polyprotein [Human immunodeficiency virus 1] [	0.000851543	2.05616	37995.2	33235485	2 (0 1 0 0 1)

## Sheet: CADASIL_2_FA
Description	P-value	Score	MW	Accession	Peptide (Hits)
2',3'-cyclic-nucleotide 3'-phosphodiesterase (EC 3.1.4.37)	1.01682e-09	288.247	45070.4	180687	55 (45 5 2 1 2)
I38369 beta-tubulin - human (fragment)	1.43173e-10	168.183	48848.5	2119276	34 (31 2 1 0 0)
novel protein similar to human titin (TTN) [Danio rerio]	0.00472099	148.086	2437322	94732358	27 (5 6 4 6 6)
tubulin alpha 6 [Homo sapiens]	1.13682e-08	126.206	49863.5	14389309	35 (32 1 1 0 1)
tubulin, beta 4 [Homo sapiens]	2.69557e-09	122.231	49553.9	21361322	45 (27 16 1 0 1)
ferritin, heavy polypeptide 1 [Homo sapiens]	2.28038e-08	112.293	21212.3	56682959	49 (35 4 3 4 3)
myelin basic protein isoform 1 [Homo sapiens]	9.05249e-07	76.1724	21480	68509930	26 (18 5 1 1 1)
tubulin, beta, 4 [Homo sapiens]	1.70552e-08	74.2307	50400.3	50592996	13 (9 2 2 0 0)
ferritin, light polypeptide [Homo sapiens]	2.67819e-11	70.2532	20007.1	20149498	24 (22 1 1 0 0)
ATP synthase, H+ transporting, mitochondrial F1 complex, alpha subunit	5.88574e-09	70.2316	59713.7	4757810	8 (8 0 0 0 0)
neurofilament, light polypeptide 68kDa [Homo sapiens]	5.07012e-06	70.1274	61479.3	105990539	11 (6 2 2 1 0)
H4 histone family, member A [Homo sapiens]	0.000163918	56.1445	11360.4	4504301	11 (10 0 1 0 0)
KIAA0968 protein [Homo sapiens]	5.45711e-06	54.1713	58985.2	4589580	9 (6 0 2 0 1)
A Chain A, Crystal Structure Of A DictyosteliumTETRAHYMENA CHIMERA Actin (Mutan	2.4489e-10	50.2228	41719.9	7245526	6 (5 1 0 0 0)
brain creatine kinase [Homo sapiens]	3.87683e-08	50.1753	42617.4	21536286	9 (9 0 0 0 0)
tubulin, alpha-like 3 [Homo sapiens]	0.000234437	50.1253	49876.8	13376181	12 (9 2 0 0 1)
histone H2B [Homo sapiens]	2.27812e-07	48.1643	13927.6	1568557	10 (7 0 1 1 1)
eukaryotic translation elongation factor 1 alpha 1 [Homo sapiens]	6.57034e-07	48.1225	50109.2	4503471	7 (5 1 0 1 0)
tubulin, alpha 1B [Mus musculus]	2.46478e-08	40.2328	50119.6	34740335	11 (11 0 0 0 0)
neurofilament, medium polypeptide 150kDa [Homo sapiens]	9.07069e-07	40.1967	102386	4885513	5 (5 0 0 0 0)
brain abundant, membrane attached signal protein 1 [Homo sapiens]	1.7463e-05	36.1081	22680	30795231	4 (2 2 0 0 0)
BIRC6_HUMAN Baculoviral IAP repeat-containing protein 6 (Ubiquitin-conjugatin	0.00888495	36.0744	527277	12585192	6 (2 0 1 2 1)
unnamed protein product [Homo sapiens]	2.06834e-05	34.1045	69301.8	30023	5 (2 2 1 0 0)
syntaxin binding protein 1 isoform a [Homo sapiens]	0.00866602	32.1012	68692.3	4507297	4 (2 1 0 1 0)
unnamed protein product [Homo sapiens]	4.64381e-08	30.213	49811	10433717	12 (7 1 3 0 1)
tubulin, beta 2 [Homo sapiens]	3.3777e-06	30.1724	49875	4507729	6 (6 0 0 0 0)
solute carrier family 25 (mitochondrial carrier; adenine nucleotide tr	5.48656e-06	30.1515	33043.2	55749577	4 (4 0 0 0 0)
N-ethylmaleimide-sensitive factor [Homo sapiens]	5.96624e-06	30.1325	82602.2	11079228	3 (3 0 0 0 0)
unnamed protein product [Homo sapiens]	3.44296e-06	30.1068	72215.9	825646	6 (6 0 0 0 0)
hypothetical protein ( (L11645) alpha-tubulin [Homo sapiens] ) [Neuros	2.75946e-11	28.2224	10326.7	85091443	5 (4 1 0 0 0)
COL1A1 and PDGFB fusion transcript [Homo sapiens] [M	7.98798e-05	28.1901	36963.2	3288487	7 (6 1 0 0 0)
KRHU2 keratin 1, type II, cytoskeletal - human	1.2145e-05	28.1115	65454.4	7428712	5 (2 2 0 0 1)
unnamed protein product [Homo sapiens]	0.004973	26.0984	173364	34532087	4 (2 0 0 1 1)
KIAA0417 [Homo sapiens]	0.000191317	24.1218	78381.4	2887409	3 (2 0 0 1 0)
calcium/calmodulin-dependent protein kinase IIB isoform 8 [Homo sapien	0.000346188	24.0926	50923	26051218	3 (2 0 0 1 0)
NIMA (never in mitosis gene a)- related kinase 10 isoform 2 [Homo sapi	0.00755694	24.0802	45252.7	44917615	3 (2 0 0 1 0)
unnamed protein product [Homo sapiens]	0.00758287	24.0663	65446.1	10435519	3 (2 0 0 1 0)
ATS8_HUMAN ADAMTS-8 precursor (A disintegrin and metalloproteinase with throm	0.00225292	24.06	96609.6	12643905	3 (1 1 1 0 0)
tubulin, beta, 2 [Homo sapiens]	4.64381e-08	22.2126	49799	5174735	10 (2 4 4 0 0)
TBB4Q_HUMAN Tubulin beta-4q chain	0.000213833	22.0986	48403.5	12643363	3 (0 2 1 0 0)
mitochondrial DNA polymerase gamma [Homo sapiens] [M	0.00755137	22.0963	139730	1644239	3 (0 2 1 0 0)
neurolysin [Homo sapiens]	0.00479369	22.0943	80599.8	14149738	5 (2 0 0 0 3)
collapsin response mediator protein 1 isoform 2 [Homo sapiens]	0.00183994	22.0898	62144.8	4503051	3 (1 1 0 1 0)
DPYL4_HUMAN Dihydropyrimidinase-related protein 4 (DRP-4) (Collapsin response	0.00357376	22.0876	61838.5	68067941	4 (0 2 0 1 1)
keratin 10 [Homo sapiens]	8.80354e-06	20.1899	58791.5	40354192	3 (3 0 0 0 0)
VDAC2 [Homo sapiens]	0.00422551	20.1357	30393	48146045	2 (2 0 0 0 0)
microtubule-associated protein 1B isoform 1 [Homo sapiens]	0.0061717	20.1308	270452	5174525	2 (2 0 0 0 0)
dihydropyrimidinase-like 2 [Homo sapiens]	5.60489e-05	20.1285	62254.7	4503377	2 (2 0 0 0 0)
BTBD6_HUMAN BTB/POZ domain-containing protein 6 (Lens BTB domain protein) [MA	0.00485698	20.1238	45896.2	38604972	3 (1 1 0 0 1)
A Chain A, The 1.9-A Crystal Structure Of The Noncollagenous (Nc1) Domain Of H	7.85814e-05	20.1238	25314	21466080	2 (2 0 0 0 0)
K1C9_HUMAN Keratin, type I cytoskeletal 9 (Cytokeratin-9) (CK-9) (Keratin-9)	0.00348435	20.121	62091.8	81175178	6 (4 1 0 0 1)
histone cluster 1, H1d [Homo sapiens]	0.000777565	20.1146	22336.3	4885377	3 (3 0 0 0 0)
KIAA0338 [Homo sapiens]	7.95233e-05	20.1099	103516	2224617	3 (1 0 1 1 0)
small optic lobes [Homo sapiens]	0.000602042	20.0868	117239	5032105	2 (2 0 0 0 0)
H1 histone family, member X [Homo sapiens]	0.00690141	20.0858	22473.5	5174449	2 (2 0 0 0 0)
BMX non-receptor tyrosine kinase [Homo sapiens]	0.00933447	20.0805	77961	4502435	3 (0 1 2 0 0)
proteolipid protein [Rattus norvegicus]	0.000441313	20.0711	30057.1	13591880	2 (2 0 0 0 0)
crystallin, alpha B [Homo sapiens]	0.00339616	20.0685	20146.4	4503057	2 (2 0 0 0 0)
FELE-1 [Homo sapiens]	0.00469754	20.0441	275266	22779437	3 (2 0 1 0 0)
PDZ domain containing RING finger 3 [Homo sapiens]	0.00124333	18.1558	119521	57529737	9 (4 0 2 2 1)
histone cluster 1, H1a [Homo sapiens]	0.00109291	18.1319	21828.9	4885373	3 (2 1 0 0 0)
solute carrier family 25 (mitochondrial carrier; oxoglutarate carrier)	1.79315e-05	18.13	34039.8	21361114	5 (3 1 0 1 0)
envelope glycoprotein [Simian-Human immunodeficiency virus]	0.00521192	18.1205	42059.1	30691475	3 (1 2 0 0 0)
pol protein [Human T-lymphotropic virus 3]	0.00993503	18.0926	24392.7	62240428	6 (2 3 0 1 0)
unnamed protein product [Homo sapiens]	0.00965599	18.0787	102385	16552612	2 (1 1 0 0 0)
KIAA1425 protein [Homo sapiens]	0.00235594	18.0758	55840.3	7243231	2 (1 1 0 0 0)
KIAA0303 [Homo sapiens]	0.000944227	18.0728	231650	2224547	2 (1 1 0 0 0)
potassium channel, subfamily V, member 2 [Homo sapiens]	0.00508972	18.0683	62419.4	19424136	2 (1 1 0 0 0)
leukocyte-associated immunoglobulin-like receptor 1 isoform a precursor	0.00277953	18.0638	31392.7	4504943	2 (1 1 0 0 0)
unnamed protein product [Homo sapiens]	0.00787575	18.0622	54748.2	10433669	2 (1 1 0 0 0)
immunoglobulin heavy chain variable region [Homo sapiens]	0.0036945	18.0556	13573.7	118406155	2 (1 1 0 0 0)
FLJ00149 protein [Homo sapiens]	0.00780044	18.0542	88246.2	18676504	2 (1 1 0 0 0)
hCG2040632 [Homo sapiens]	0.00856045	18.0541	14458	119578681	2 (1 1 0 0 0)
WMBEHQ UL5 protein - human herpesvirus 2 (strain HG52) (fragment)	0.000912752	16.125	88093.8	74001	2 (0 2 0 0 0)
Golgi autoantigen, golgin subfamily a, 3 [Homo sapiens]	0.00356189	16.0994	167252	30089940	3 (1 2 0 0 0)
calcium/calmodulin-dependent protein kinase II gamma isoform 1 [Mus mu	0.00342515	16.0972	59569.4	75991700	3 (1 0 0 1 1)
prefoldin subunit 2 [Homo sapiens]	0.000237953	16.0901	16637.6	12408675	2 (1 0 1 0 0)
KIAA1708 [Homo sapiens]	0.00084577	16.0823	185022	30725047	3 (1 1 1 0 0)
hypothetical protein DDBDRAFT_0167554 [Dictyostelium discoideum AX4]	0.00347789	16.0813	97953.4	66821673	3 (0 2 0 1 0)
heavy neurofilament subunit [Homo sapiens]	0.000153841	16.079	111713	1841430	2 (1 0 1 0 0)
unnamed protein product [Homo sapiens]	0.00170873	16.0777	88238.1	14042214	4 (0 1 1 0 2)
R Chain R, Twinning In Crystals Of Human Skeletal Muscle D- Glyceraldehyde-3-Pho	0.00187892	16.0669	35853.3	230867	2 (0 2 0 0 0)
helicase-MOI [Homo sapiens]	0.00135392	16.0662	218672	5019620	5 (1 1 0 0 3)
unnamed protein product [Homo sapiens]	0.0025558	16.0644	77147.9	21749692	2 (0 2 0 0 0)
unnamed protein product [Homo sapiens]	0.00937559	16.0633	46284.2	22760597	2 (1 0 1 0 0)
ankyrin repeat and BTB (POZ) domain containing 2 [Homo sapiens]	0.00171851	16.0613	93230.4	21956639	2 (0 2 0 0 0)
MYH13_HUMAN Myosin-13 (Myosin heavy chain 13) (Myosin heavy chain, skeletal m	0.00937835	16.0587	223539	13431717	3 (0 1 1 0 1)
unnamed protein product [Homo sapiens]	0.00985769	16.0464	29236.8	10432716	2 (1 0 1 0 0)
unnamed protein product [Homo sapiens]	2.38065e-06	14.1215	57919.5	28940	2 (1 0 0 1 0)
novel protein similar to a human protein associated with Myc [Danio rer	0.00697826	14.1165	335699	26788088	3 (0 1 0 1 1)
adaptor protein complex AP-2, mu1 [Mus musculus]	0.000287519	14.1117	49623.1	6753074	3 (1 0 0 0 2)
AF304164_1 keratin 1 [Homo sapiens]	0.000135946	14.1067	66026.9	11935049	2 (1 0 0 1 0)
NK6 transcription factor related, locus 2 [Homo sapiens]	0.00346913	14.0938	29217.2	28912912	8 (5 0 2 1 0)
synapsin I isoform Ia [Homo sapiens]	3.53059e-05	14.0876	74065.8	19924099	2 (1 0 0 1 0)
envelope glycoprotein [Human immunodeficiency virus type 1]	0.00878026	14.0787	69903.3	2290100	2 (0 1 1 0 0)
succinate-CoA ligase, ADP-forming, beta subunit [Homo sapiens]	0.00656239	14.0774	50285.3	11321583	2 (1 0 0 1 0)
fibrillin 15 [Homo sapiens]	0.00138074	14.0689	56489.6	5924015	2 (1 0 0 1 0)
p21-activated kinase 1 [Homo sapiens]	0.00685636	14.0659	60608.8	42794769	3 (1 0 0 0 2)
alpha thalassemia/mental retardation syndrome X-linked homolog (human)	0.000916562	14.061	100836	149055561	2 (1 0 0 1 0)
hCG1781941 [Homo sapiens]	0.00798211	14.0609	32128.1	119631165	3 (0 1 0 1 1)
H1 histone family, member 0 [Homo sapiens]	0.000176061	12.1483	20850.2	4885371	2 (1 0 0 0 1)
UV radiation resistance associated [Homo sapiens]	0.00470166	12.0996	78102.3	21687212	3 (1 1 0 0 1)
beta-neoendorphin-dynorphin preproprotein [Homo sapiens]	0.00331823	12.0964	28367.2	13270473	2 (0 0 2 0 0)
T-cell receptor beta chain [Homo sapiens]	0.00601349	12.0794	7054.4	9844306	2 (0 1 0 1 0)
YTDC2_HUMAN YTH domain-containing protein 2	0.00682847	12.0744	74853.3	74718549	2 (0 1 0 1 0)
KIAA0191 [Homo sapiens]	0.0011042	12.0715	171002	1228035	2 (0 1 0 1 0)
TEP1_HUMAN Telomerase protein component 1 (Telomerase-associated protein 1) (	0.00249088	12.0583	290229	47606203	2 (0 1 0 1 0)
envelope glycoprotein [Human immunodeficiency virus 1]	0.00885157	12.0582	23040.7	46252828	2 (1 0 0 0 1)
polyprotein [Human enterovirus 94]	0.00220961	12.0541	243612	119220354	2 (1 0 0 0 1)
nanospan [Homo sapiens]	0.00447425	12.0531	10484.2	114786416	2 (0 0 2 0 0)
SYN2_HUMAN Synapsin-2 (Synapsin II)	1.74086e-06	10.2094	62928.8	6686022	1 (1 0 0 0 0)
A unnamed protein product [Homo sapiens]	0.000294613	10.1789	21184.2	122919718	4 (3 0 1 0 0)
S68466 translation elongation factor EF-Tu-like protein P43 precursor, mitochondria	9.44128e-09	10.1744	49502.2	7443384	1 (1 0 0 0 0)
prostaglandin H2 D-isomerase [Homo sapiens]	3.28291e-05	10.173	21015.3	32171249	1 (1 0 0 0 0)
histone H2A [Homo sapiens]	0.000116857	10.1674	13986.8	28195394	1 (1 0 0 0 0)
cadherin 4, type 1 preproprotein [Homo sapiens]	0.0060016	10.1499	100218	14589893	1 (1 0 0 0 0)
H2A histone family, member A [Homo sapiens]	7.99017e-06	10.1474	14127	10645195	6 (6 0 0 0 0)
gag protein [Human immunodeficiency virus 1]	0.00870932	10.1334	55119.2	90812182	2 (0 1 0 0 1)
AF166179_1 polyprotein [Human coxsackievirus A9] [MAS	0.000830755	10.1319	14925.1	6752481	2 (1 0 0 1 0)
tyrosine 3-monooxygenase/tryptophan 5-monooxygenase activation protein,	2.78108e-06	10.1303	28284.9	9507245	1 (1 0 0 0 0)
H2A histone family, member O [Homo sapiens]	1.71146e-05	10.1295	14086.9	4504251	2 (2 0 0 0 0)
Env [Human immunodeficiency virus 1]	0.00616733	10.1272	98977.4	115334449	1 (1 0 0 0 0)
phosphoglucomutase 3 [Homo sapiens]	0.00368777	10.1218	59814.4	7661568	3 (1 0 2 0 0)
tubulin, alpha 4 [Mus musculus]	3.07363e-05	10.121	49892.4	6678467	2 (2 0 0 0 0)
RAB6-interacting protein 2 isoform alpha [Homo sapiens]	0.00967561	10.1073	108726	14149661	1 (1 0 0 0 0)
calcium/calmodulin-dependent protein kinase IIB isoform 2 [Homo sapien	0.00715115	10.1024	60348.7	26051206	1 (1 0 0 0 0)
TYRO3 protein tyrosine kinase variant [Homo sapiens]	0.00405874	10.1014	102844	62088442	1 (1 0 0 0 0)
zinc finger and BTB domain containing 7B [Homo sapiens]	0.000364922	10.1007	58181.4	7705664	1 (1 0 0 0 0)
sine oculis homeobox homolog 6 [Homo sapiens]	0.000256552	10.1006	27647.3	6677979	5 (2 2 0 1 0)
nef [Human immunodeficiency virus 1]	0.00125613	10.0967	23401.5	3618046	1 (1 0 0 0 0)
gag protein [Human immunodeficiency virus 1]	0.00885172	10.0965	54959	55139252	1 (1 0 0 0 0)
ABC3 [Homo sapiens]	0.0096516	10.0958	191264	1699038	1 (1 0 0 0 0)
contactin 1 isoform 1 precursor [Homo sapiens]	0.000721588	10.0956	113249	28373117	1 (1 0 0 0 0)
tat protein [Human immunodeficiency virus 1]	0.00148391	10.0943	11647.8	71725996	1 (1 0 0 0 0)
protein kinase C, gamma [Homo sapiens]	0.00763637	10.0931	78397.3	13384594	1 (1 0 0 0 0)
KIAA0990 protein [Homo sapiens]	0.00529296	10.0917	100221	40789012	3 (2 0 1 0 0)
hCG1811681 [Homo sapiens]	0.000206978	10.0904	9526.92	119623533	1 (1 0 0 0 0)
envelope glycoprotein [Human immunodeficiency virus 1]	2.42872e-05	10.0897	23093.5	114803004	1 (1 0 0 0 0)
ORF 72 [Human herpesvirus 8 type M]	0.00749352	10.0886	28082.6	18846042	1 (1 0 0 0 0)
cyclin M3 isoform 1 [Homo sapiens]	0.00124503	10.0883	76072.2	40068049	1 (1 0 0 0 0)
actin binding protein ABP620 [Homo sapiens]	0.00287243	10.0882	619925	5821434	1 (1 0 0 0 0)
truncated envelope glycoprotein [Human immunodeficiency virus 1]	0.00798746	10.0872	96504.1	88174724	1 (1 0 0 0 0)
SEC63-like protein [Homo sapiens]	0.00338276	10.0871	87941.5	6005872	2 (2 0 0 0 0)
C-type lectin domain family 2, member L [Homo sapiens]	0.000354916	10.0869	15599.5	122937462	1 (1 0 0 0 0)
T08691 hypothetical protein DKFZp564F052.1 - human (fragment)	4.53435e-05	10.0868	48512.2	7512733	3 (0 2 0 0 1)
AF169618_1 envelope glycoprotein [Human immunodeficiency virus type 1] [MA	0.00372982	10.0864	13883.9	5731330	1 (1 0 0 0 0)
GDAP1_HUMAN Ganglioside-induced differentiation-associated protein 1 (GDAP1)	0.00055452	10.0859	41225.8	38257679	1 (1 0 0 0 0)
mitochondrial ribosomal protein L4 isoform a [Homo sapiens]	0.00830674	10.0851	34897.3	22547136	1 (1 0 0 0 0)
similar to 60S ribosomal protein L7; similar to P18124 (PID:d133021) [Hom	0.00158213	10.085	29018	4176369	1 (1 0 0 0 0)
transmembrane protein 26 [Homo sapiens]	0.00892493	10.0847	41645.1	50233826	1 (1 0 0 0 0)
brain ryanodine receptor [Homo sapiens]	0.00832907	10.084	550721	2696015	2 (0 1 0 0 1)
glutamate transporter [Homo sapiens]	0.00523632	10.0832	61664.6	488752	1 (1 0 0 0 0)
calcium/calmodulin-dependent protein kinase ID isoform 2 [Homo sapiens	2.01245e-07	10.0823	42886.7	23943850	1 (1 0 0 0 0)
KIAA1363 protein [Homo sapiens]	0.00233267	10.0821	48042	7243107	2 (2 0 0 0 0)
hypothetical protein [Homo sapiens]	0.00931405	10.0819	73052	21734051	2 (2 0 0 0 0)
zinc finger protein [Homo sapiens]	0.00780402	10.0814	54357.5	2232013	3 (0 0 1 2 0)
axonemal dynein, heavy chain [Homo sapiens]	0.00595816	10.0813	6330.11	4165281	1 (1 0 0 0 0)
ribosomal protein L18a [Homo sapiens]	0.0052726	10.0801	20748.9	11415026	1 (1 0 0 0 0)
CASP8 associated protein 2 [Homo sapiens]	0.00521453	10.0798	222519	6912288	1 (1 0 0 0 0)
unactive progesterone receptor, 23 kD [Homo sapiens]	0.000296041	10.0792	18685.4	23308579	1 (1 0 0 0 0)
envelope glycoprotein [Human T-lymphotropic virus 1]	0.00225465	10.0792	5930.74	110554747	1 (1 0 0 0 0)
reverse transcriptase [Human immunodeficiency virus 1]	0.00234315	10.0778	22628.8	67079652	1 (1 0 0 0 0)
hypothetical protein [Homo sapiens]	0.00991669	10.0772	71337.4	31874458	1 (1 0 0 0 0)
ubiquinol-cytochrome c reductase core protein II [Homo sapiens]	0.00228694	10.0772	48412.9	50592988	1 (1 0 0 0 0)
gag protein [Human immunodeficiency virus 1]	0.00157042	10.0768	15442	73913233	3 (0 0 1 0 2)
protease [Human immunodeficiency virus 1]	0.00648025	10.0767	10792.4	55703378	4 (2 2 0 0 0)
hCG2030818, isoform CRA_b [Homo sapiens]	0.00224193	10.0757	17494	119568841	2 (1 0 1 0 0)
gp160 [Human immunodeficiency virus 1]	0.00349079	10.0751	97378.7	108860363	1 (1 0 0 0 0)
PAR3 beta [Homo sapiens]	0.000180842	10.0749	121077	27530701	1 (1 0 0 0 0)
IF2 protein [Homo sapiens]	0.00018608	10.0731	138726	5002645	1 (1 0 0 0 0)
unnamed protein product [Homo sapiens]	0.00646325	10.0731	42228.2	7022606	2 (0 0 1 1 0)
signal-regulatory protein alpha precursor [Homo sapiens]	0.00126069	10.0731	54932.9	18426911	1 (1 0 0 0 0)
C-type lectin domain family 4, member M isoform 1 [Homo sapiens]	0.00370287	10.0719	45321.8	42542390	1 (1 0 0 0 0)
hCG1984631 [Homo sapiens]	0.00232481	10.0717	11065.7	119576155	3 (2 1 0 0 0)
immunoglobulin heavy chain variable region [Homo sapiens]	0.00416063	10.0716	14015.9	84683052	1 (1 0 0 0 0)
senataxin [Mus musculus]	0.00291426	10.0707	297399	113722131	3 (0 0 0 2 1)
lambda 1 immunoglobulin light chain variable region [Homo sapiens]	0.00529969	10.0699	12926.4	3023119	1 (1 0 0 0 0)
hypothetical protein LOC64423 isoform 2 [Homo sapiens]	0.00138856	10.0698	78720.3	89886460	1 (1 0 0 0 0)
transforming gene product TGAT [Homo sapiens]	0.00179752	10.0679	29925.1	33146382	1 (1 0 0 0 0)
hCG2041667 [Homo sapiens]	0.00321597	10.0679	7607.91	119567812	1 (1 0 0 0 0)
SMCP-2 [Homo sapiens]	0.00320649	10.0676	57357.6	2424977	1 (1 0 0 0 0)
gp160 [Human immunodeficiency virus 1]	0.0075487	10.0674	98766.2	7414278	1 (1 0 0 0 0)
A40671 dynamin, internal form 1, long C-terminal form - human [	0.00289516	10.0671	97201	539580	1 (1 0 0 0 0)
VCPIP1 protein [Homo sapiens]	0.00372345	10.0671	86264	29612620	1 (1 0 0 0 0)
cerebellar degeneration-related protein 2-like [Mus musculus]	0.00366484	10.0657	53180	124286868	1 (1 0 0 0 0)
putative protein serine/threonine kinase [Dictyostelium discoideum AX4	0.00196426	10.0646	212878	66818841	2 (0 1 0 0 1)
immunoglobulin gamma heavy chain variable region [Homo sapiens]	0.00156626	10.0639	13634.6	31337594	2 (1 0 0 1 0)
kynurenine aminotransferase III isoform 1 [Homo sapiens]	0.00509378	10.0634	51367.6	56713254	1 (1 0 0 0 0)
aminoacylase 1 [Homo sapiens]	0.000116532	10.0625	45856.1	4501901	1 (1 0 0 0 0)
unnamed protein product [Homo sapiens]	0.00946143	10.0612	74313	21755466	1 (1 0 0 0 0)
L100_ADE41 Late 100 kDa protein	0.00242704	10.0609	87254.4	125878	2 (0 1 0 0 1)
FK506 binding protein 14, 22 kDa [Homo sapiens]	0.000660426	10.0594	24156.5	8923659	1 (1 0 0 0 0)
envelope glycoprotein; gp120 [Human immunodeficiency virus type 1]	0.0021216	10.0588	7721.74	3064322	1 (1 0 0 0 0)
MRS2-like, magnesium homeostasis factor [Mus musculus]	0.00263694	10.0583	53963.6	61656188	5 (3 2 0 0 0)
hypothetical protein [Homo sapiens]	0.00375023	10.0579	23933.8	6807904	1 (1 0 0 0 0)
CTTN protein [Homo sapiens]	0.00268966	10.0578	70914.8	21707902	1 (1 0 0 0 0)
tat protein [Human immunodeficiency virus 1]	0.00636122	10.0575	11615.9	36365377	1 (1 0 0 0 0)
hypothetical protein DDBDRAFT_0167766 [Dictyostelium discoideum AX4]	0.00213976	10.0574	124377	66821053	1 (1 0 0 0 0)
envelope protein [Human immunodeficiency virus 1] [	0.00563553	10.0572	96707.6	38892633	3 (0 0 1 0 2)
immunoglobulin heavy chain variable region [Homo sapiens]	0.00569922	10.0568	16404.1	37777910	1 (1 0 0 0 0)
orphan nuclear receptor steroidogenic factor 1, SF-1(long terminal repeat	0.0086166	10.0564	22274.9	1246103	2 (0 0 1 1 0)
unnamed protein product [Homo sapiens]	0.00143874	10.0561	31661.2	16553778	1 (1 0 0 0 0)
unnamed protein product [Homo sapiens]	0.0028718	10.0555	131088	34528578	3 (0 0 0 2 1)
FzE3 [Homo sapiens]	0.00436652	10.0551	63714.9	3434981	1 (1 0 0 0 0)
envelope glycoprotein [Human immunodeficiency virus 1]	0.0017445	10.0549	95623.8	29409313	1 (1 0 0 0 0)
IRS-1 PH domain binding protein PHIP variant 9 [Homo sapiens]	0.00238361	10.054	98646.4	12007334	1 (1 0 0 0 0)
UDP-N-acetylglucosamine: alpha-1,3-D-mannoside beta-1,4-N-acetylglucosa	0.00706908	10.0538	56011.5	7019407	1 (1 0 0 0 0)
gag-pol polyprotein [Human immunodeficiency virus 1]	0.00669918	10.0537	18762.7	42628439	1 (1 0 0 0 0)
AF137883_1 envelope glycoprotein [Human immunodeficiency virus type 1] [MA	0.00338117	10.0527	23352.5	6910946	1 (1 0 0 0 0)
glutamate receptor, metabotropic 2 precursor [Homo sapiens]	0.00965179	10.052	95506.6	66529100	1 (1 0 0 0 0)
pol protein [Human immunodeficiency virus 1]	0.00622177	10.0511	10559.6	116274170	1 (1 0 0 0 0)
KIAA1135 protein [Homo sapiens]	0.00509625	10.0508	88999.3	20521774	1 (1 0 0 0 0)
KIAA0115 [Homo sapiens]	0.00618838	10.0505	50680	473947	1 (1 0 0 0 0)
unknown [Homo sapiens]	0.00373458	10.049	16312.1	2286202	1 (1 0 0 0 0)
pol protein [Human immunodeficiency virus 1]	0.00920768	10.049	113461	60651907	1 (1 0 0 0 0)
solute carrier family 22 member 5 [Homo sapiens]	0.00801793	10.0484	62710.8	4507005	1 (1 0 0 0 0)
adenomatosis polyposis coli [Homo sapiens]	0.00139355	10.0483	11191	146180735	1 (1 0 0 0 0)
hypothetical protein [Homo sapiens]	0.00615049	10.0475	62447.8	51476416	1 (1 0 0 0 0)
IEX1_HUMAN Radiation-inducible immediate-early gene IEX-1 (Immediate early pro	0.00469177	10.0469	16917.8	3123229	1 (1 0 0 0 0)
DIRAS family, GTP-binding RAS-like 1 [Homo sapiens]	0.00871025	10.0456	22314.4	21553323	2 (0 1 0 0 1)
ring finger protein 10 [Homo sapiens]	0.00124393	10.0456	89870.8	34452681	1 (1 0 0 0 0)
envelope protein [Simian-Human immunodeficiency virus]	0.00417094	10.0452	42424.5	72398879	1 (1 0 0 0 0)
envelope glycoprotein [Human immunodeficiency virus 1]	0.00493733	10.0451	23256	109389796	1 (1 0 0 0 0)
envelope glycoprotein [Human immunodeficiency virus 1]	0.00785113	10.0449	12813.2	118427012	1 (1 0 0 0 0)
envelope glycoprotein [Human immunodeficiency virus 1]	0.00348233	10.0438	96123.2	77980191	1 (1 0 0 0 0)
unnamed protein product [Homo sapiens]	0.00021875	10.0437	20182	34526907	1 (1 0 0 0 0)
unnamed protein product [Homo sapiens]	0.00702935	10.0415	32475.7	10439583	1 (1 0 0 0 0)
FK506-binding protein 4 [Homo sapiens]	0.00281411	10.0391	51772.2	4503729	2 (0 1 0 0 1)
transcription factor 21 [Homo sapiens]	0.00973626	10.0375	19703	38202237	1 (1 0 0 0 0)
FLJ44815 protein [Homo sapiens]	0.00359454	10.035	17750	124376660	1 (1 0 0 0 0)
p40 [Homo sapiens]	0.00834112	10.0348	40016.7	2072950	1 (1 0 0 0 0)
vacuolar H+ATPase B2 [Homo sapiens]	0.00171822	10.0347	56465	19913428	1 (1 0 0 0 0)
unnamed protein product [Homo sapiens]	0.00878879	10.0319	39292	16552172	1 (1 0 0 0 0)
Chain , Ferritin (H-Chain) Mutant (Lys 86 Replaced By Gln) (K86q)	9.01837e-05	8.20235	21212.3	229918	1 (0 1 0 0 0)
nef protein [Human immunodeficiency virus 1]	0.00460073	8.14439	25201.3	94539768	5 (2 2 1 0 0)
pol protein [Human immunodeficiency virus 1]	0.00126375	8.12373	38931.6	117950085	1 (0 1 0 0 0)
AF166172_1 polyprotein [Human coxsackievirus A9] [MAS	0.00579432	8.12206	14943.1	6752467	2 (0 1 1 0 0)
envelope glycoprotein [Human immunodeficiency virus 1]	0.00273869	8.11983	31845	99029604	13 (3 3 4 0 3)
KIAA1345 protein [Homo sapiens]	0.00656527	8.11223	175742	7243071	2 (0 1 1 0 0)
AF154671_1 CRB1 [Homo sapiens]	0.00060264	8.10849	151312	6014482	1 (0 1 0 0 0)
AF170033_1 envelope glycoprotein [Human immunodeficiency virus type 2] [M	0.00514224	8.10137	67043	11990520	1 (0 1 0 0 0)
AF161362_1 HSPC099 [Homo sapiens]	0.00237333	8.09535	18984.7	6841138	1 (0 1 0 0 0)
novel protein similar to human forkhead box K2 FOXK2 [Mus musculus] [M	0.00931958	8.09312	68404.5	123230336	2 (0 0 0 2 0)
sucrase-isomaltase (alpha-glucosidase) [Homo sapiens]	0.00446417	8.09215	209270	4506945	1 (0 1 0 0 0)
hypothetical protein LOC345651 [Homo sapiens]	0.0031408	8.09021	41976	63055057	2 (1 1 0 0 0)
class IVb beta tubulin [Homo sapiens]	0.000115339	8.08858	49721	27368062	2 (0 1 1 0 0)
dedicator of cytokinesis 4, isoform CRA_d [Homo sapiens]	0.00746588	8.08751	166436	119603860	3 (0 2 1 0 0)
hypothetical protein LOC54854 [Homo sapiens]	0.00353137	8.0871	51765.9	8923190	2 (0 2 0 0 0)
phosphatidylinositol glycan anchor biosynthesis, class X [Homo sapiens	0.00175349	8.08246	24780.5	23680885	1 (0 1 0 0 0)
cancer susceptibility candidate 4 isoform a [Homo sapiens]	0.00969759	8.07981	49467.9	29826289	1 (0 1 0 0 0)
1B37_HUMAN HLA class I histocompatibility antigen, B-37 alpha chain precursor (	0.00888506	8.07666	40431.1	122160	1 (0 1 0 0 0)
unnamed protein product [Homo sapiens]	0.00346957	8.07582	101735	7020323	1 (0 1 0 0 0)
ATP-binding cassette, sub-family A, member 7 isoform b [Homo sapiens]	0.00549624	8.07541	218478	15451838	4 (1 0 1 1 1)
immunoglobulin heavy chain [Homo sapiens]	0.0069717	8.07508	16624	46254260	1 (0 1 0 0 0)
apobec-1 complementation factor isoform 2 [Homo sapiens]	0.00622857	8.07441	65161.4	20357575	2 (0 0 1 0 1)
tuberoinfundibular 39 residue protein precursor [Homo sapiens]	0.00384188	8.07327	11195.3	30425368	1 (0 1 0 0 0)
envelope glycoprotein [Human immunodeficiency virus 1]	0.00150578	8.07248	23087.6	58701418	1 (0 1 0 0 0)
vpr protein [Human immunodeficiency virus type 1] [M	0.00384365	8.07231	11386.8	1477880	1 (0 1 0 0 0)
calcium/calmodulin-dependent protein kinase IIA isoform 1 [Homo sapien	0.00137561	8.07173	55285.2	25952114	1 (0 1 0 0 0)
immunoglobulin A heavy chain variable region [Homo sapiens]	0.00782335	8.07038	12117.8	121944546	1 (0 1 0 0 0)
FGA [Homo sapiens]	0.00022746	8.0676	7038.43	27597169	1 (0 1 0 0 0)
intercellular adhesion molecule 1 (CD54), human rhinovirus receptor [B	0.00752327	8.06754	58392.1	27805931	2 (0 0 1 0 1)
putative schizophrenia protein variant 3 [Homo sapiens]	0.000402718	8.06533	11697.9	27497726	1 (0 1 0 0 0)
hCG2040709 [Homo sapiens]	0.00810127	8.06449	4976.65	119599148	1 (0 1 0 0 0)
unnamed protein product [Homo sapiens]	0.00135001	8.06078	46311.8	21758977	1 (0 1 0 0 0)
E1 [Human papillomavirus type 13]	0.00230254	8.06059	73411	85724383	1 (0 1 0 0 0)
unnamed protein product [Homo sapiens]	0.00971939	8.05975	24905.7	34530001	2 (0 1 0 0 1)
NCAP_PI1HA Nucleoprotein (Protein N) (Nucleocapsid protein) (NP protein)	0.00763112	8.05966	57701.1	548003	1 (0 1 0 0 0)
orf RF3 [Human herpesvirus 6]	0.00801901	8.0585	14021.3	235438	1 (0 1 0 0 0)
ribonuclease H1 [Homo sapiens]	0.0086602	8.05784	32147.1	54696208	1 (0 1 0 0 0)
envelope glycoprotein [Human immunodeficiency virus 1]	0.00756125	8.05744	57698.8	21666331	1 (0 1 0 0 0)
RT09_HUMAN 28S ribosomal protein S9, mitochondrial precursor (S9mt) (MRP-S9)	0.00984587	8.05706	45793.8	20140018	1 (0 1 0 0 0)
protease [Human immunodeficiency virus 1]	0.00129717	8.05657	10754	55704342	1 (0 1 0 0 0)
hCG2038895 [Homo sapiens]	0.00479748	8.05627	11059.4	119612245	1 (0 1 0 0 0)
unnamed protein product [Homo sapiens]	0.00115663	8.05601	53192.9	7023514	1 (0 1 0 0 0)
huntingtin interacting protein-1-related [Homo sapiens]	0.0078418	8.05588	119315	48762942	2 (0 0 0 2 0)
annexin A13 isoform b [Homo sapiens]	0.00540093	8.05446	39719.3	51896029	1 (0 1 0 0 0)
adenylate kinase 1 [Homo sapiens]	0.00881819	8.05423	21621.3	4502011	1 (0 1 0 0 0)
polyprotein [Human enterovirus D]	0.00220961	8.05415	33998.9	126116644	1 (0 1 0 0 0)
envelope glycoprotein [Human immunodeficiency virus 1]	0.0051509	8.0539	96394.9	113196568	1 (0 1 0 0 0)
AP1S3_HUMAN AP-1 complex subunit sigma-3 (Adapter-related protein complex 1 s	0.00334143	8.05336	18268.6	21541959	1 (0 1 0 0 0)
sulfotransferase family, cytosolic, 1C, member 3 [Homo sapiens]	0.0037225	8.05305	35865	56847626	1 (0 1 0 0 0)
anti-Rh(D) antibody immunoglobulin heavy chain variable region [Homo sap	0.0054975	8.05289	13906.9	93007560	1 (0 1 0 0 0)
pol protein [Human immunodeficiency virus 1]	0.00752508	8.05257	10429.7	116273207	1 (0 1 0 0 0)
BCR/ABL fusion protein e14a5 [Homo sapiens]	0.00859343	8.04896	9195.57	117671503	1 (0 1 0 0 0)
envelope glycoprotein gp120 [Human immunodeficiency virus 1]	0.000286449	8.04892	25576.7	85663440	2 (0 1 0 1 0)
hLAT1-3TM [Homo sapiens]	0.00941427	8.04842	18766.9	21320898	1 (0 1 0 0 0)
novel protein similar to H.sapiens TMTC2, transmembrane and tetratricop	0.00284054	8.04746	91318.2	55963435	1 (0 1 0 0 0)
TSHR_HUMAN Thyrotropin receptor precursor (TSH-R) (Thyroid-stimulating hormon	0.000689921	8.04651	86773.5	62298994	1 (0 1 0 0 0)
unnamed protein product [Homo sapiens]	0.00806235	8.04581	21657.2	14042659	1 (0 1 0 0 0)
LEU2_HUMAN Leukemia-associated protein 2 (Deleted in lymphocytic leukemia 2)	0.00787165	8.04576	10189.2	8928175	1 (0 1 0 0 0)
C21orf2 protein variant [Homo sapiens]	0.00721029	8.0451	24082.5	62088736	1 (0 1 0 0 0)
haemagglutinin-neuraminidase [Human parainfluenza virus 3]	0.00501904	8.04195	17473.6	15209379	1 (0 1 0 0 0)
ADAM metallopeptidase domain 10 [Homo sapiens]	0.00740413	8.03853	84087.7	4557251	1 (0 1 0 0 0)
CN115_HUMAN Uncharacterized protein C14orf115	0.00402441	8.03525	78210.4	41016925	1 (0 1 0 0 0)
MYO10_HUMAN Myosin-X (Unconventional myosin-10)	0.00881213	8.03513	237240	17433142	2 (0 0 1 0 1)
envelope glycoprotein [Human immunodeficiency virus 1]	0.00484467	6.08677	98788.7	113201814	2 (1 0 1 0 0)
JC7831 cancer-associated CAGE protein - human	0.0013571	6.07984	71110.8	60729526	2 (0 0 0 1 1)
unnamed protein product [Homo sapiens]	0.00815039	6.07651	91948.2	10440018	2 (0 0 0 1 1)
pol protein [Human immunodeficiency virus 1]	0.00505071	6.07412	57174.4	116277396	4 (0 2 2 0 0)
hCG1645235, isoform CRA_b [Homo sapiens]	0.0064763	6.07215	26510.1	119592769	2 (0 0 0 1 1)
Gag [Human immunodeficiency virus 1]	0.00669682	6.06674	55788.2	114431012	2 (0 1 1 0 0)
KIAA0444 protein [Homo sapiens]	0.00990296	6.05739	110566	3413850	2 (0 0 0 1 1)
TP53-induced glycolysis and apoptosis regulator [Homo sapiens]	0.0019945	6.04693	30043.1	9966849	2 (0 0 0 1 1)
envelope glycoprotein [Human immunodeficiency virus 1]	0.00605303	4.11956	16770.6	30267210	5 (2 0 0 3 0)
transcriptional regulator ICP4 [Human herpesvirus 3]	0.00347789	4.07329	139912	9625936	2 (0 0 0 0 2)
fiber protein [Human adenovirus type 29]	0.00888506	4.07327	33017.1	82523523	2 (0 0 0 0 2)
fascin 3 [Homo sapiens]	0.00712195	4.06077	56586.9	9966791	2 (0 1 0 1 0)
KIAA0356 protein [Homo sapiens]	0.00955646	4.04714	117597	6634023	2 (0 0 0 0 2)
unnamed protein product [Homo sapiens]	0.00174616	2.08474	13480.8	21757865	2 (0 1 0 0 1)
protease [Human immunodeficiency virus 1]	0.00505071	2.07159	10837	120432599	3 (1 0 0 1 1)
zinc finger protein 33B [Homo sapiens]	0.0079921	2.06251	90624.2	24307875	2 (0 1 0 0 1)
TNKS1_HUMAN Tankyrase-1 (TANK1) (Tankyrase I) (TNKS-1) (TRF1-interacting anky
K1045_HUMAN Protein KIAA1045
hypothetical protein [Homo sapiens]
formiminotransferase cyclodeaminase [Homo sapiens]
polyprotein [Human rhinovirus 47]
hypothetical protein LOC79736 [Homo sapiens]
hematopoietic signal peptide-containing isoform 2 [Homo sapiens]
envelope glycoprotein [Human immunodeficiency virus 1]
leukemia-associated protein 2 [Homo sapiens]
KIAA0431 [Homo sapiens]
coiled-coil domain containing 42 [Homo sapiens]
Tubulin, beta [Homo sapiens]
actin-like protein [Homo sapiens]
unnamed protein product [Homo sapiens]
Na,K-ATPase catalytic subunit alpha-A protein [Homo sapiens]
F-box and WD repeat domain containing 11 isoform A [Homo sapiens]
S34775 nicotinic acetylcholine receptor epsilon chain precursor - human
S31503 H+/K+-exchanging ATPase (EC 3.6.3.10) ATP1AL1 - human (fragment)
ORF putative E6 [Human papillomavirus type 59]
pol polyprotein [Human immunodeficiency virus type 1]
Unknown [Homo sapiens]
coiled-coil domain containing 25 [Homo sapiens]
solute carrier family 10 (sodium/bile acid cotransporter family), memb
DNA packaging tegument protein UL25 [Human herpesvirus 3]
nuclear protein in testis, isoform CRA_b [Homo sapiens]
NEDD4_HUMAN E3 ubiquitin-protein ligase NEDD4
unnamed protein product [Homo sapiens]
AF258985_1 envelope glycoprotein [Human immunodeficiency virus type 1] [M
immunoglobulin E heavy chain variable region [Homo sapiens]
AF447582_1 HLCDGP1 [Homo sapiens]
tartrate resistant acid phosphatase 5 precursor [Homo sapiens]
envelope glycoprotein [Human immunodeficiency virus 1]
immunoglobulin heavy chain variable region [Homo sapiens]
immunoglobulin heavy chain variable region [Homo sapiens]
anaplastic lymphoma kinase (Ki-1), isoform CRA_c [Homo sapiens]
envelope glycoprotein [Human immunodeficiency virus type 1]
unnamed protein product [Homo sapiens]
envelope glycoprotein [Human immunodeficiency virus 1]
hCG201417 [Homo sapiens]
phosphotyrosyl phosphatase activator [Homo sapiens]
immunoglobulin heavy chain variable region [Homo sapiens]
ATP synthase, H+ transporting, mitochondrial F0 complex, subunit d isof
pol protein [Human immunodeficiency virus 1]
envelope glycoprotein [Human immunodeficiency virus type 1]
HESB like domain containing 1 [Homo sapiens]
protease [Human immunodeficiency virus 1]
functionless protein [Homo sapiens]
zinc finger, DHHC-type containing 11 [Homo sapiens]
glioma pathogenesis-related protein precursor [Homo sapiens]
AF067164_1 zinc finger protein 2 [Homo sapiens]
TRI25_HUMAN Tripartite motif-containing protein 25 (Zinc finger protein 147)
antibody, light chain variable regin to HIV1 gp41 [Homo sapiens]
FLJ00345 protein [Homo sapiens]
gag protein [Human immunodeficiency virus 1]
keratin [Homo sapiens]
envelope glycoprotein [Human immunodeficiency virus type 1]
zinc finger protein 519 [Homo sapiens]
fatty acid binding protein 5 (psoriasis-associated) [Homo sapiens]
hypothetical protein (similar to Human CGI-32 protein [Streptococcus p
nef protein [Human immunodeficiency virus type 1] [M
envelope glycoprotein [Human immunodeficiency virus 1]
hCG1790787, isoform CRA_b [Homo sapiens]
protease [Human immunodeficiency virus 1]
vpu [Human immunodeficiency virus 1]
leucine-rich repeat LGI family, member 4 [Homo sapiens]
rhophilin, Rho GTPase binding protein 1, isoform CRA_e [Homo sapiens] [
envelope glycoprotein [Human immunodeficiency virus type 1]
unnamed protein product [Homo sapiens]
sarco/endoplasmic reticulum Ca2+ -ATPase [Homo sapiens]
LEU2_HUMAN Leukemia-associated protein 2 (Deleted in lymphocytic leukemia 2)
progesterone receptor membrane component 1 [Homo sapiens]
immunoglobuliln heavy chain variable region [Homo sapiens]
C8ORFK32 protein [Homo sapiens]
unknown [Homo sapiens]
fusion protein [Human parainfluenza virus 3]
retinal outer segment membrane protein 1 [Homo sapiens]
immunoglobulin kappa light chain variable region [Homo sapiens]
hCG2038572 [Homo sapiens]
sialic acid binding Ig-like lectin 7 isoform 1 [Homo sapiens]
unknown [Homo sapiens]
putative TCPTP-interacting protein [Homo sapiens]
hypothetical protein [Homo sapiens]
nef protein [Human immunodeficiency virus 1]
gag protein [Human immunodeficiency virus 1]
GCN5 general control of amino-acid synthesis 5-like 2 (yeast), isoform
CXorf30 [Homo sapiens]
tat protein [Human immunodeficiency virus 1]
hypothetical protein [Homo sapiens]
envelope glycoprotein [Human immunodeficiency virus type 1]
unnamed protein product [Homo sapiens]
Homo sapiens zinc finger protein 202 [synthetic construct]
PDZ domain containing RING finger 3 [Homo sapiens]
AF289590_1 unknown [Homo sapiens]
C-type lectin domain family 3 member A [Homo sapiens]
envelope glycoprotein [Human immunodeficiency virus 1]
vif protein [Human immunodeficiency virus 1]
hypothetical protein LOC374977 [Homo sapiens]
protease [Human immunodeficiency virus 1]
hCG1645235, isoform CRA_b [Homo sapiens]
unnamed protein product [Homo sapiens]
KDEL1_HUMAN KDEL motif-containing protein 1 precursor
gp120 [Human immunodeficiency virus 1]
AF156064_1 pol protein [Human immunodeficiency virus type 1]
reverse transcriptase [Human immunodeficiency virus 1]
KIAA1152 protein [Homo sapiens]
envelope glycoprotein gp120 [Human immunodeficiency virus 1]
pol protein [Human immunodeficiency virus 1]
hypothetical protein [Homo sapiens]
nef protein [Human immunodeficiency virus 1]
reverse transcriptase [Human immunodeficiency virus 1]

## Sheet: CADASIL_3_FA
Description	P-value	Score	MW	Accession	Peptide (Hits)
I38369 beta-tubulin - human	1.79412e-12	118.246	48848.5	2119276	29 (27 1 0 0 1)
brain creatine kinase [Homo sapiens]	6.11289e-12	110.279	42617.4	21536286	28 (26 0 0 2 0)
tubulin, beta 4 [Homo sapiens]	6.60752e-09	106.207	49553.9	21361322	19 (16 3 0 0 0)
2',3'-cyclic-nucleotide 3'-phosphodiesterase (EC 3.1.4.37)	3.48859e-06	68.1921	45070.4	180687	11 (7 0 0 1 3)
ferritin, heavy polypeptide 1 [Homo sapiens]	7.55129e-11	60.3427	21212.3	56682959	26 (24 1 0 0 1)
tubulin alpha 6 [Homo sapiens]	3.89486e-07	44.2077	49863.5	14389309	19 (15 2 2 0 0)
ubiquitin carboxyl-terminal esterase L1 (ubiquitin thiolesterase) [Hom	1.56683e-05	44.1757	24808.5	21361091	7 (6 0 0 1 0)
ferritin, light polypeptide [Homo sapiens]	4.27245e-08	40.2328	20007.1	20149498	5 (5 0 0 0 0)
A Chain A, Crystal Structure Of A DictyosteliumTETRAHYMENA CHIMERA Actin (Mutan	4.35938e-06	36.1695	41719.9	7245526	9 (7 1 1 0 0)
OGT(O-Glc-NAc transferase)-interacting protein 106 KDa isoform 1 [	0.00228867	34.0933	105974	111074532	5 (1 2 1 0 1)
tubulin, alpha 1B [Mus musculus]	8.5241e-09	30.2336	50119.6	34740335	11 (11 0 0 0 0)
syntaxin binding protein 1 isoform a [Homo sapiens]	5.90064e-08	30.1471	68692.3	4507297	3 (3 0 0 0 0)
ATP synthase, H+ transporting, mitochondrial F1 complex, alpha subunit	5.77702e-08	30.1323	59713.7	4757810	5 (5 0 0 0 0)
ATRB actin, skeletal muscle - rabbit	0.000172989	26.1584	41789.8	71611	5 (2 1 2 0 0)
C43273 heregulin precursor, splice form beta-2 - human	0.00369271	26.0882	70152.8	483138	4 (1 1 1 0 1)
alpha-1 type IV collagen	0.00244897	26.0842	160510	180803	3 (1 2 0 0 0)
unnamed protein product [Homo sapiens]	3.97711e-08	24.2025	49811	10433717	5 (2 1 2 0 0)
unknown [Homo sapiens]	0.00770915	24.0987	268547	62988842	3 (2 0 0 1 0)
similar to GenBank Accession Number AF045184 nuclear receptor coactivato	0.00455323	22.1883	25758.4	29841015	8 (1 4 2 1 0)
neurolysin [Homo sapiens]	0.00687526	22.1107	80599.8	14149738	6 (1 2 1 1 1)
tubulin polymerization promoting protein [Homo sapiens]	8.61105e-09	20.258	23679.2	5902018	2 (2 0 0 0 0)
myelin basic protein isoform 1 [Homo sapiens]	3.02085e-06	20.1641	21480	68509930	4 (4 0 0 0 0)
dihydropyrimidinase-like 2 [Homo sapiens]	2.82749e-06	20.1595	62254.7	4503377	4 (4 0 0 0 0)
tubulin, beta 2 [Homo sapiens]	0.00437336	20.0918	49875	4507729	4 (4 0 0 0 0)
G protein-coupled receptor 156 [Homo sapiens]	0.00349135	20.0727	89026.6	23308585	3 (1 0 1 1 0)
H4 histone family, member A [Homo sapiens]	0.00155922	20.063	11360.4	4504301	2 (2 0 0 0 0)
human PGP 9.5 homologue [cattle, Peptide Partial, 25 aa]	0.00233825	18.1703	2810.49	236733	3 (0 2 0 0 1)
neurofilament, medium polypeptide 150kDa [Homo sapiens]	0.00027664	18.1614	102386	4885513	2 (1 1 0 0 0)
SYN2_HUMAN Synapsin-2 (Synapsin II)	3.22522e-05	18.1524	62928.8	6686022	2 (1 1 0 0 0)
heat shock 90kDa protein 1, beta [Homo sapiens]	7.97527e-06	18.1491	83212.2	20149594	3 (2 1 0 0 0)
tubulin, beta, 4 [Homo sapiens]	1.23985e-08	18.1375	50400.3	50592996	3 (1 2 0 0 0)
histone H2B [Homo sapiens]	0.000252595	18.1313	13927.6	1568557	5 (4 1 0 0 0)
visinin-like 1 [Mus musculus]	1.67105e-06	18.1257	22128	6755983	2 (1 1 0 0 0)
pol protein [Human T-lymphotropic virus 3]	0.0076771	18.0841	24392.7	62240428	3 (1 2 0 0 0)
microtubule-associated protein 2 [Homo sapiens]	0.000194936	18.0816	199045	1850617	2 (1 1 0 0 0)
unnamed protein product [Homo sapiens]	7.97527e-06	16.1313	35738.8	32486	3 (0 3 0 0 0)
TENX_HUMAN Tenascin-X precursor (TN-X) (Hexabrachion-like protein)	0.00146551	16.073	464166	9087217	2 (1 0 1 0 0)
NO145 protein [Homo sapiens]	0.00383713	16.0641	62380.5	15126581	2 (1 0 1 0 0)
phosphoinositide-3-kinase, catalytic, beta polypeptide [Homo sapiens]	0.00938503	16.0562	122683	5453894	2 (1 0 1 0 0)
AF181721_1 RU2S [Homo sapiens]	0.00398395	16.0534	52772	6684530	3 (0 0 2 1 0)
tubulin, beta, 2 [Homo sapiens]	1.87059e-09	14.2063	49799	5174735	4 (0 2 2 0 0)
KIAA0987 protein [Homo sapiens]	2.10028e-06	14.0781	123629	4589618	2 (1 0 0 1 0)
TBB4Q_HUMAN Tubulin beta-4q chain	0.000101926	14.0687	48403.5	12643363	3 (0 2 1 0 0)
glial fibrillary acidic protein [Homo sapiens]	2.016e-08	12.1721	49849.7	4503979	2 (1 0 0 0 1)
A55877 tumor necrosis factor type 1 receptor associated protein TRAP-1 - human	0.000328948	12.1491	75295	1082886	2 (1 0 0 0 1)
cone cGMP phosphodiesterase [Homo sapiens]	0.00867717	12.0666	99097.2	1149517	2 (1 0 0 0 1)
diacylglycerol kinase, beta isoform 1 [Homo sapiens]	0.00840242	12.0623	90536.4	22027632	2 (0 1 0 1 0)
unnamed protein product [Homo sapiens]	0.00767099	12.0447	93509.1	7023920	2 (1 0 0 0 1)
histone H2A [Homo sapiens]	4.60572e-07	10.1945	13986.8	28195394	2 (2 0 0 0 0)
neurofilament, light polypeptide 68kDa [Homo sapiens]	5.95839e-09	10.1898	61479.3	105990539	2 (2 0 0 0 0)
prostaglandin H2 D-isomerase [Homo sapiens]	3.1445e-06	10.1682	21015.3	32171249	1 (1 0 0 0 0)
tyrosine 3/tryptophan 5 -monooxygenase activation protein, epsilon poly	1.34963e-06	10.1582	29155.4	5803225	1 (1 0 0 0 0)
keratin 10 [Homo sapiens]	0.0011939	10.1499	58791.5	40354192	1 (1 0 0 0 0)
cadherin 4, type 1 preproprotein [Homo sapiens]	0.00146961	10.1494	100218	14589893	1 (1 0 0 0 0)
sorting nexin 2 [Homo sapiens]	0.000479855	10.1482	59115.3	2827434	2 (1 1 0 0 0)
olfactory receptor, family 6, subfamily N, member 2 [Homo sapiens]	0.000234443	10.1451	35667.8	52627158	1 (1 0 0 0 0)
glyceraldehyde-3-phosphate dehydrogenase [Homo sapiens]	2.02701e-06	10.135	36030.4	7669492	1 (1 0 0 0 0)
A40671 dynamin, internal form 1, long C-terminal form - human [M	0.00421035	10.1329	97201	539580	1 (1 0 0 0 0)
H2A histone family, member A [Homo sapiens]	0.00280552	10.1308	14127	10645195	2 (2 0 0 0 0)
unnamed protein product [Homo sapiens]	6.73535e-05	10.1254	57919.5	28940	1 (1 0 0 0 0)
polyubiquitin [Homo sapiens]	0.000383935	10.1244	68450.1	2627129	1 (1 0 0 0 0)
H1 histone family, member 0 [Homo sapiens]	4.9695e-06	10.1234	20850.2	4885371	1 (1 0 0 0 0)
hypothetical protein LOC345651 [Homo sapiens]	0.00760121	10.1166	41976	63055057	3 (1 0 1 1 0)
Grainyhead-like 1 (Drosophila) [Homo sapiens]	0.00158208	10.1159	70028.6	45709002	1 (1 0 0 0 0)
EAA1_HUMAN Excitatory amino acid transporter 1 (Solute carrier family 1 member	1.02446e-05	10.1115	59533.8	1169458	2 (2 0 0 0 0)
gag protein [Human immunodeficiency virus 1]	0.00288101	10.1108	15613.9	57546931	2 (1 0 1 0 0)
E1A binding protein p400, isoform CRA_a [Homo sapiens]	0.000845678	10.1105	334553	119618940	1 (1 0 0 0 0)
calcium/calmodulin-dependent protein kinase II gamma isoform 1 [Mus mu	0.00297814	10.1093	59569.4	75991700	1 (1 0 0 0 0)
H2A histone family, member O [Homo sapiens]	0.000215888	10.107	14086.9	4504251	1 (1 0 0 0 0)
tubulin, alpha 1a [Mus musculus]	5.41819e-06	10.1028	49927.7	6678465	1 (1 0 0 0 0)
hypothetical protein LOC169436 [Homo sapiens]	0.00431136	10.0985	75627.2	76563908	2 (1 1 0 0 0)
unnamed protein product [Homo sapiens]	0.00711807	10.0965	102213	21749873	1 (1 0 0 0 0)
A45036 single-stranded-DNA-binding protein Pur alpha - human [MA	1.92432e-06	10.0941	34948.5	346338	1 (1 0 0 0 0)
immunoglobulin alpha heavy chain variable region [Homo sapiens]	0.0021955	10.0904	14011.9	62871218	3 (1 1 0 1 0)
calcium/calmodulin-dependent protein kinase II delta isoform 1 [Homo s	0.00882045	10.0899	54093.6	26667183	1 (1 0 0 0 0)
envelope glycoprotein [Human immunodeficiency virus 1]	0.00264121	10.0892	19914.3	125395709	1 (1 0 0 0 0)
AF154671_1 CRB1 [Homo sapiens]	0.00776632	10.0889	151312	6014482	1 (1 0 0 0 0)
zinc finger protein 284 [Homo sapiens]	0.000960587	10.0876	68973.8	83716019	1 (1 0 0 0 0)
heavy neurofilament subunit [Homo sapiens]	0.000383068	10.0867	111713	1841430	1 (1 0 0 0 0)
heterogeneous nuclear ribonucleoprotein H2 [Homo sapiens]	0.000171681	10.0861	49232.3	9624998	1 (1 0 0 0 0)
heterogeneous nuclear ribonucleoprotein A2/B1 isoform A2 [Homo sapiens]	3.33481e-05	10.0855	35983.8	4504447	1 (1 0 0 0 0)
tubulin, alpha 4 [Mus musculus]	0.000534345	10.0824	49892.4	6678467	1 (1 0 0 0 0)
envelope glycoprotein [Human immunodeficiency virus 1]	0.00690906	10.0819	12925.5	30143558	1 (1 0 0 0 0)
unnamed protein product [Homo sapiens]	0.00842595	10.08	81971.1	10436614	1 (1 0 0 0 0)
envelope glycoprotein [Human immunodeficiency virus 1]	0.00769249	10.0794	93725.8	87248747	1 (1 0 0 0 0)
novel protein similar to a human protein associated with Myc [Danio rer	0.00286088	10.0788	335699	26788088	2 (0 1 0 0 1)
envelope glycoprotein [Human immunodeficiency virus type 1]	0.000824457	10.0777	11921.9	4530387	1 (1 0 0 0 0)
synaptosomal-associated protein, 25kDa [Homo sapiens]	0.0040828	10.077	10676	24740601	1 (1 0 0 0 0)
collapsin response mediator protein 1 isoform 2 [Homo sapiens]	0.00880095	10.0769	62144.8	4503051	1 (1 0 0 0 0)
hCG2041191, isoform CRA_b [Homo sapiens]	0.00215967	10.0766	15604	119624399	1 (1 0 0 0 0)
lipase-like, ab-hydrolase domain containing 3 [Homo sapiens]	0.00413619	10.0758	42231.2	55662303	1 (1 0 0 0 0)
suppressor of Ty 3 homolog isoform 1 [Homo sapiens]	0.00454322	10.0749	35770	4507309	1 (1 0 0 0 0)
envelope glycoprotein [Human immunodeficiency virus 1]	0.00715843	10.0707	24050	80974396	1 (1 0 0 0 0)
envelope glycoprotein [Human immunodeficiency virus type 1]	0.00932349	10.0701	10745.7	11992456	1 (1 0 0 0 0)
KIAA0268 [Homo sapiens]	0.00163859	10.0701	133622	1665825	1 (1 0 0 0 0)
cytoskeleton associated protein 2-like [Homo sapiens]	0.00428577	10.069	83521.2	32526890	1 (1 0 0 0 0)
chromosome 7 open reading frame 25, isoform CRA_c [Homo sapiens]	0.0092572	10.0677	17492.4	119614556	1 (1 0 0 0 0)
ECM29_HUMAN Proteasome-associated protein ECM29 homolog (Ecm29)	0.00434204	10.0652	204159	61212960	2 (1 0 0 0 1)
tyrosine 3/tryptophan 5 -monooxygenase activation protein, zeta polypep	0.000890505	10.0644	27727.7	4507953	1 (1 0 0 0 0)
KIAA0293 [Homo sapiens]	0.00629149	10.061	163691	14133201	1 (1 0 0 0 0)
immunoglobulin lambda chain variable region [Homo sapiens]	0.00117371	10.0553	9713.64	12044111	1 (1 0 0 0 0)
calcium/calmodulin-dependent protein kinase ID isoform 2 [Homo sapiens	0.00615598	10.0494	42886.7	23943850	1 (1 0 0 0 0)
ubiquitously transcribed tetratricopeptide repeat, X chromosome [Homo	0.00183607	10.0493	154134	10863943	1 (1 0 0 0 0)
ras homolog gene family, member J [Homo sapiens]	0.00856923	10.0492	23804.8	16903164	1 (1 0 0 0 0)
OLFM4 protein [Homo sapiens]	0.000810757	10.048	48166.5	29126831	1 (1 0 0 0 0)
breast cancer antiestrogen resistance 3 [Homo sapiens]	0.00160957	10.0471	92506.8	4502371	1 (1 0 0 0 0)
AF447869_1 Unknown [Homo sapiens]	0.00165575	10.0471	10675.9	33317107	1 (1 0 0 0 0)
AF139987_3 Wbscr1 alternative spliced product [Mus musculus]	0.00694734	10.0459	25170.5	4972951	1 (1 0 0 0 0)
TGIF1_HUMAN Homeobox protein TGIF1 (5'-TG-3'-interacting factor 1)	0.0026386	10.044	43016.7	61252273	1 (1 0 0 0 0)
nuclear transcription factor, X-box binding 1 isoform 2 [Homo sapiens]	0.00559095	10.0418	113548	22212925	1 (1 0 0 0 0)
envelope glycoprotein [Human immunodeficiency virus 1]	0.00543418	10.0414	32552	38047270	1 (1 0 0 0 0)
similar to Argininosuccinate synthase (Citrulline--aspartate ligase) [Ho	0.00177873	10.0403	24164.3	51095136	1 (1 0 0 0 0)
XPA binding protein 2 [Homo sapiens]	0.00397851	10.0375	99946.5	55770906	1 (1 0 0 0 0)
cholinergic receptor, nicotinic, alpha 4 subunit precursor [Homo sapien	0.00973912	10.0369	69912.2	4502827	1 (1 0 0 0 0)
hypothetical protein FLJ90166, isoform CRA_b [Homo sapiens]	0.00835708	8.12973	87225.3	119595898	1 (0 1 0 0 0)
hCG1773636 [Homo sapiens]	0.002609	8.12516	20494.8	119578198	2 (0 2 0 0 0)
ubiquitin and ribosomal protein L40 precursor [Homo sapiens]	0.000383935	8.12443	14719	4507761	1 (0 1 0 0 0)
lipin 3 [Homo sapiens]	0.000148035	8.11332	93556.5	74271888	2 (0 2 0 0 0)
gag-pol polyprotein [Human immunodeficiency virus type 1]	0.00532021	8.10814	111188	4324832	1 (0 1 0 0 0)
neuronal PAS1 [Homo sapiens]	0.00189532	8.10638	62710.7	1840056	1 (0 1 0 0 0)
envelope glycoprotein [Human immunodeficiency virus 1]	0.00792593	8.09522	31845	99029604	6 (1 1 2 1 1)
KIAA0642 protein [Homo sapiens]	0.00124319	8.09149	153400	20521117	2 (0 1 0 1 0)
contactin 4 isoform a precursor [Homo sapiens]	0.00402291	8.09143	113383	28373122	1 (0 1 0 0 0)
ataxia telangiectasia mutated homolog [Mus musculus]	0.00462445	8.08952	349262	6680740	1 (0 1 0 0 0)
calcium/calmodulin-dependent protein kinase IIB isoform 8 [Homo sapien	1.86756e-05	8.08948	50923	26051218	1 (0 1 0 0 0)
reverse transcriptase [Human immunodeficiency virus 1]	0.00693757	8.08551	11925.3	89519465	1 (0 1 0 0 0)
hypothetical protein LOC221786 [Homo sapiens]	0.0033684	8.08203	66234.2	21495178	1 (0 1 0 0 0)
envelope glycoprotein [Human immunodeficiency virus 1]	0.00340574	8.08144	16552.5	50982945	2 (0 1 0 1 0)
immunoglobulin heavy chain variable region [Homo sapiens]	0.00229974	8.07694	10843.3	112696980	1 (0 1 0 0 0)
gp120 protein [Human immunodeficiency virus 1] [MA	0.00413975	8.07093	21162.8	27848257	2 (0 1 0 1 0)
CY15A_HUMAN Putative testis protein CYorf15A	0.0040828	8.06964	21467.8	59797961	1 (0 1 0 0 0)
X Chain X, Crystal Structure Of B. Anthracis Protective Antigen Complexed With	0.0024419	8.06921	82623.9	51247574	2 (0 0 1 0 1)
similar to ch-TOG protein from Homo sapiens [Arabidopsis thaliana]	0.00744514	8.06221	176818	20197534	2 (0 0 0 2 0)
gamma-aminobutyric acid A receptor, alpha 3 precursor [Homo sapiens]	0.00937621	8.06034	55129.4	4557603	1 (0 1 0 0 0)
envelope protein [Human immunodeficiency virus 1]	0.0090436	8.06034	96206.6	11124727	2 (0 0 1 0 1)
VE6_HPVME Protein E6	0.00211619	8.05592	18726.4	137780	1 (0 1 0 0 0)
ZN790_HUMAN Zinc finger protein 790	0.00130613	8.04992	74550.9	74758336	1 (0 1 0 0 0)
BPNT1 protein [Homo sapiens]	0.00425802	8.04688	35749.3	17389533	1 (0 1 0 0 0)
envelope glycoprotein [Human immunodeficiency virus 1]	0.00939842	8.03834	13249.9	56124952	1 (0 1 0 0 0)
solute carrier family 35 (UDP-N-acetylglucosamine (UDP-GlcNAc) transpor	0.00324596	8.0365	35961.3	6912668	1 (0 1 0 0 0)
glutamate transporter [Homo sapiens]	0.000467614	6.14617	61664.6	488752	3 (1 1 1 0 0)
cadherin 15 preproprotein [Homo sapiens]	0.00124479	6.07506	88861.6	4826669	2 (0 1 1 0 0)
phosphoprotein [Human metapneumovirus]	0.00351415	6.07156	32342.5	24429790	2 (0 1 1 0 0)
PT0369 Ig gamma chain precursor V region (gamma F9) - human (fragment)	0.00586761	6.06777	13974.8	87789	2 (0 0 0 1 1)
Homo sapiens ubiquitin-conjugating enzyme E2 variant 2 [synthetic constr	0.0031754	6.04223	16465.3	30584729	2 (0 0 0 1 1)
TAFII140 protein [Homo sapiens]	0.00662754	4.11928	81621.6	13374079	3 (0 1 0 2 0)
env polypeptide [Human immunodeficiency virus 1] [M	0.0052423	4.06299	59659.7	8919890	2 (0 0 0 0 2)
envelope glycoprotein [Human immunodeficiency virus 1]	0.00125686	4.03638	95623.8	29409313	3 (1 0 0 2 0)
hypothetical protein [Human calicivirus Hu/NLV/Queen's Arms/Leeds/92/UK	0.00593584	2.1058	22089.1	14330431	2 (0 1 0 0 1)
testis-specific protein kinase 2 [Homo sapiens]	0.00326506	2.08632	63599.3	110349799	2 (1 0 0 0 1)
KIAA0320 [Homo sapiens]	20520997	3 (3 0 0 0 0)
phosphoglycerate mutase 2 (muscle) [Homo sapiens] [M	51094513	5 (4 1 0 0 0)
phosphoglycerate mutase family 3 [Homo sapiens]	71274132	6 (2 2 1 1 0)
unnamed protein product [Homo sapiens]	10435335	3 (3 0 0 0 0)
synaptotagmin I [Homo sapiens]	5032139	2 (2 0 0 0 0)
hypothetical protein ( (L11645) alpha-tubulin [Homo sapiens] ) [Neuros	85091443	2 (2 0 0 0 0)
phosphoprotein enriched in astrocytes 15 [Homo sapiens]	4505705	3 (3 0 0 0 0)
phosphoglycerate mutase 1 (brain) [Homo sapiens]	4505753	6 (6 0 0 0 0)
microsomal glutathione S-transferase 3 [Homo sapiens]	4758714	3 (3 0 0 0 0)
tubulin, alpha 4 [Mus musculus]	6678467	5 (4 1 0 0 0)
brain glycogen phosphorylase [Homo sapiens]	21361370	2 (2 0 0 0 0)
HSP70-HOM [Homo sapiens]	4529894	2 (2 0 0 0 0)
protein kinase C, gamma [Homo sapiens]	13384594	3 (1 0 1 1 0)
alanyl-tRNA synthetase [Homo sapiens]	1015321	3 (1 1 0 0 1)
CN145_HUMAN Uncharacterized protein C14orf145	71153197	9 (1 2 3 3 0)
eukaryotic translation initiation factor 3, subunit 6 48kDa [Homo sapie	4503521	5 (3 1 1 0 0)
claudin 11 [Homo sapiens]	10938016	6 (3 1 1 0 1)
unnamed protein product [Homo sapiens]	21757045	3 (1 0 1 1 0)
KIAA0041 [Homo sapiens]	27529706	2 (2 0 0 0 0)
heterogeneous nuclear ribonucleoprotein A2/B1 isoform A2 [Homo sapiens]	4504447	3 (3 0 0 0 0)
MTMR6_HUMAN Myotubularin-related protein 6	33112672	3 (1 0 1 1 0)
transmembrane protein 30A [Homo sapiens]	8922720	3 (1 1 0 0 1)
unnamed protein product [Homo sapiens]	10435855	4 (0 3 0 1 0)
B Chain B, Ligand-Free Heterodimeric Human Glutathione S-Transferase M2-3 (Ec 2	5822511	2 (2 0 0 0 0)
PLIN_HUMAN Perilipin (PERI) (Lipid droplet-associated protein)	8134637	4 (3 1 0 0 0)
unnamed protein product [Homo sapiens]	14042419	5 (1 1 1 0 2)
unnamed protein product [Homo sapiens]	34530959	3 (2 0 0 0 1)
hypothetical protein [Homo sapiens]	21732286	3 (1 1 0 0 1)
novel protein similar to human THO complex 2 (THOC2) [Danio rerio] [MAS	27802720	4 (0 0 3 0 1)
unnamed protein product [Homo sapiens]	34534922	4 (2 0 1 0 1)
pyruvate dehydrogenase (lipoamide) beta [Homo sapiens]	4505687	2 (1 1 0 0 0)
DPYL4_HUMAN Dihydropyrimidinase-related protein 4 (DRP-4) (Collapsin response	68067941	4 (1 3 0 0 0)
heat shock 70kDa protein 2 [Homo sapiens]	13676857	2 (1 1 0 0 0)
peroxiredoxin 5 precursor, isoform a [Homo sapiens]	6912238	2 (1 1 0 0 0)
CE152_HUMAN Centrosomal protein of 152 kDa (Cep152 protein)	62286590	7 (1 2 1 2 1)
flavin containing monooxygenase 1 [Homo sapiens]	4503755	4 (1 2 1 0 0)
ADEN_ADE03 Adenain (Endoprotease) (Late L3 23 kDa protein)	139365	3 (1 1 0 1 0)
glutamate transporter [Homo sapiens]	488752	9 (2 1 1 3 2)
clusterin isoform 2 [Homo sapiens]	42740907	2 (1 1 0 0 0)
fer (fps/fes related) tyrosine kinase (phosphoprotein NCP94) [Homo sa	119964721	3 (1 0 1 0 1)
septin 5 [Homo sapiens]	9945439	2 (1 1 0 0 0)
likely ortholog of rat brain-enriched guanylate kinase-associated prot	13124765	3 (1 0 1 0 1)
IQGA3_HUMAN Ras GTPase-activating-like protein IQGAP3	49036087	2 (1 1 0 0 0)
DDX20_HUMAN Probable ATP-dependent RNA helicase DDX20 (DEAD box protein 20) (	12643886	4 (0 1 1 0 2)
radixin [Homo sapiens]	4506467	4 (0 0 2 1 1)
PHYIP_HUMAN Phytanoyl-CoA hydroxylase-interacting protein (Phytanoyl-CoA hydro	2495731	2 (1 1 0 0 0)
KIAA1755 protein [Homo sapiens]	12698055	3 (1 0 1 0 1)
succinate-CoA ligase, ADP-forming, beta subunit [Homo sapiens]	11321583	3 (0 0 3 0 0)
heat shock 27kDa protein 1 [Homo sapiens]	4504517	2 (1 1 0 0 0)
protein kinase C, alpha [Homo sapiens]	4506067	2 (1 1 0 0 0)
hypothetical protein LOC79441 [Homo sapiens]	56711324	3 (0 2 0 0 1)
proteoglycan PG-M(V3) [Homo sapiens]	1008913	2 (1 1 0 0 0)
C Chain C, Crystal Structure Of Fibrinogen Fragment D	2781209	2 (1 1 0 0 0)
AF224710_1 amyloid precursor interacting protein type I [Homo sapiens]	7630292	2 (1 1 0 0 0)
guanylate cyclase 2D, membrane (retina-specific) [Homo sapiens]	4504217	3 (0 1 1 1 0)
KIAA0780 protein [Homo sapiens]	3882281	20 (5 3 3 6 3)
SH2B adaptor protein 3 [Homo sapiens]	4885455	3 (0 1 1 1 0)
SUCA_HUMAN Succinyl-CoA ligase [GDP-forming] subunit alpha, mitochondrial pre	20141765	2 (1 0 1 0 0)
TBB4Q_HUMAN Tubulin beta-4q chain	12643363	7 (1 4 1 1 0)
AF142498_1 14-3-3 gamma protein [Homo sapiens]	5726310	2 (0 2 0 0 0)
5'-3' exoribonuclease 1 isoform a [Homo sapiens]	110624792	5 (1 1 0 1 2)
ARP1 actin-related protein 1 homolog A, centractin alpha [Homo sapiens]	5031569	2 (1 0 1 0 0)
A Chain A, The Yeast Actin Val 159 Asn Mutant Complex With Human Gelsolin Segme	7546413	5 (2 0 1 1 1)
WD repeat domain 6 protein [Homo sapiens]	11072093	2 (1 0 1 0 0)
gag protein [Human immunodeficiency virus 1]	73913213	2 (1 0 1 0 0)
T00329 hypothetical protein KIAA0553 - human (fragment)	7513015	3 (1 0 0 1 1)
destrin isoform a [Homo sapiens]	5802966	3 (2 0 1 0 0)
hCG2013788 [Homo sapiens]	119586875	4 (0 1 2 0 1)
pol protein [Human immunodeficiency virus 1]	67866569	2 (1 0 1 0 0)
epidermal growth factor receptor pathway substrate 8 [Homo sapiens]	56682953	3 (0 0 2 1 0)
hypothetical protein [Homo sapiens]	21740085	2 (0 2 0 0 0)
G01523 heat shock protein 27 - human	7512479	2 (1 0 1 0 0)
CGHU2E collagen alpha 2(XI) chain precursor - human (fragment)	1360671	3 (1 0 0 1 1)
ATS20_HUMAN ADAMTS-20 precursor (A disintegrin and metalloproteinase with thr	29611731	2 (1 0 1 0 0)
KIAA1252 protein [Homo sapiens]	6330874	2 (0 2 0 0 0)
engulfment and cell motility 3 [Homo sapiens] [MAS	87298935	3 (1 0 2 0 0)
unnamed protein product [Homo sapiens]	7021993	3 (0 1 1 0 1)
UL10 [Human herpesvirus 5]	39841722	2 (0 2 0 0 0)
tweety homolog 3 (Drosophila) [Homo sapiens]	51094709	2 (1 0 1 0 0)
ZN200_HUMAN Zinc finger protein 200	6226509	3 (1 0 0 1 1)
zinc finger protein 225 [Homo sapiens]	110347439	2 (1 0 1 0 0)
nef protein [Human immunodeficiency virus 1]	94538716	2 (1 0 1 0 0)
vacuolar protein sorting 35 [Homo sapiens]	17999541	3 (2 0 0 1 0)
human PGP 9.5 homologue [cattle, Peptide Partial, 25 aa]	236733	3 (0 2 1 0 0)
glycoprotein M6A isoform 1 [Homo sapiens]	14149619	2 (1 0 0 1 0)
phosphodiesterase 2A, cGMP-stimulated [Homo sapiens]	4505657	2 (1 0 0 1 0)
S-laminin [Homo sapiens]	288401	2 (1 0 0 1 0)
gag protein [Human immunodeficiency virus 1]	90812182	4 (1 2 0 1 0)
formin-like 1 [Homo sapiens]	33356148	3 (0 1 0 1 1)
atlastin isoform a [Homo sapiens]	19923445	2 (1 0 0 1 0)
envelope glycoprotein [Human immunodeficiency virus 1]	56266832	2 (0 1 1 0 0)
solute carrier family 12 (sodium/potassium/chloride transporters), memb	4506975	2 (1 0 0 1 0)
staphylococcal nuclease domain containing 1 [Homo sapiens]	77404397	3 (1 1 1 0 0)
ENV_HV2D2 Envelope glycoprotein gp160 precursor (Env polyprotein) [Contains: S	1352375	3 (0 2 1 0 0)
replication protein E1 [Human papillomavirus type 24]	9628489	3 (0 1 0 1 1)
NSP4 [Human rotavirus C]	1841375	2 (0 1 1 0 0)
unnamed protein product [Homo sapiens]	28193156	5 (0 0 2 3 0)
A Chain A, Human Inducible Nitric Oxide Synthase With Inhibitor	7245982	3 (0 0 2 0 1)
SERC2_HUMAN Serine incorporator 2 (Tumor differentially expressed 2-like)	38258637	2 (1 0 0 1 0)
thymidine kinase [Human herpesvirus 2]	5926727	3 (0 0 2 0 1)
myelin protein zero [Homo sapiens]	469517	2 (1 0 0 1 0)
hypothetical protein LOC65250 [Homo sapiens] [MAS	38604073	2 (1 0 0 1 0)
KIAA1775 protein [Homo sapiens]	14625445	2 (1 0 0 1 0)
platelet-derived growth factor receptor alpha precursor [Homo sapiens]	5453870	3 (1 0 0 0 2)
aurora/IPL1-related kinase [Homo sapiens]	2641948	2 (0 1 1 0 0)
hypothetical protein LOC200373 [Homo sapiens]	71725367	2 (1 0 0 1 0)
eukaryotic translation initiation factor 2B, subunit 1 alpha, 26kDa [Ho	4503503	3 (0 0 1 2 0)
connexin 43 [Homo sapiens]	4504001	2 (1 0 0 1 0)
neurotrypsin precursor [Homo sapiens]	4506143	2 (0 1 1 0 0)
PLCD1_HUMAN 1-phosphatidylinositol-4,5-bisphosphate phosphodiesterase delta 1	1730575	2 (0 1 1 0 0)
unnamed protein product [Homo sapiens]	16553074	3 (0 1 1 1 0)
hypothetical protein LOC158763 [Homo sapiens]	40255080	4 (2 1 0 0 1)
hCG1747788 [Homo sapiens]	119608911	6 (0 0 5 1 0)
mitochondrial glutamate carrier 1 [Homo sapiens]	13375983	6 (5 0 0 0 1)
ADP-ribosylation factor-like 10C [Homo sapiens]	8922601	2 (1 0 0 0 1)
myelin oligodendrocyte glycoprotein [Homo sapiens] [M	793839	3 (2 0 0 0 1)
Hypothetical protein FLJ33706 [Homo sapiens]	85397884	8 (6 0 1 0 1)
translin-associated factor X interacting protein 1 [Homo sapiens]	110227629	2 (0 1 0 1 0)
ZNF91_HUMAN Zinc finger protein 91 (Zinc finger protein HTF10) (HPF7)	549839	2 (0 1 0 1 0)
autogenous vein graft remodeling associated protein 8 [Homo sapiens] [	125858428	3 (0 0 0 3 0)
phosphoglycerate kinase 1 [Homo sapiens]	4505763	2 (1 0 0 0 1)
dolichol monophosphate mannose synthase [Homo sapiens]	2258418	3 (1 0 0 1 1)
Rho GTPase activating protein 6 isoform 1 variant [Homo sapiens]	62087164	2 (0 0 2 0 0)
AF279689_1 fibroblast growth factor receptor 5 [Homo sapiens]	13447749	3 (0 0 2 1 0)
APG7 autophagy 7-like [Homo sapiens]	5453668	3 (0 1 1 1 0)
KIAA0423 [Homo sapiens]	20521047	2 (0 1 0 1 0)
peroxisome proliferator-activated receptor gamma, coactivator 1 beta [	31543392	4 (1 0 1 1 1)
envelope glycoprotein [Human immunodeficiency virus 1]	61741692	3 (0 1 2 0 0)
unnamed protein product [Homo sapiens]	16552323	2 (0 1 0 1 0)
envelope glycoprotein [Human immunodeficiency virus 1]	57901104	4 (1 1 1 0 1)
KIAA0566 protein [Homo sapiens]	3043656	2 (0 0 2 0 0)
pol protein [Human immunodeficiency virus 2]	148751052	2 (0 1 0 1 0)
novel protein similar to human obscurin, cytoskeletal calmodulin and t	148880026	3 (0 1 0 0 2)
calpain 11 [Homo sapiens]	5901916	2 (0 0 2 0 0)
podocalyxin-like isoform 2 precursor [Homo sapiens]	33598950	2 (0 1 0 1 0)
hCG1782854, isoform CRA_b [Homo sapiens]	119582099	3 (0 1 0 1 1)
stomatin (EPB72)-like 2 [Homo sapiens]	7305503	2 (1 0 0 0 1)
KIAA1434 protein [Homo sapiens]	7243266	3 (0 0 1 1 1)
GNAS complex locus isoform e [Homo sapiens]	117938768	2 (1 0 0 0 1)
KIAA1439 protein [Homo sapiens]	7243276	2 (0 0 2 0 0)
FLJ00007 protein [Homo sapiens]	7209315	2 (1 0 0 0 1)
UDP-N-acetyl-alpha-D-galactosamine:polypeptide N-acetylgalactosaminyltr	27530993	2 (0 0 2 0 0)
Env [Human immunodeficiency virus type 1]	4324789	2 (1 0 0 0 1)
novel protein similar to human tubulin tyrosine ligase-like family, mem	55962352	3 (0 1 0 0 2)
mitogen-activated protein kinase kinase kinase 13 [Homo sapiens]	4758696	2 (0 1 0 1 0)
tubulin, alpha 1a [Mus musculus]	6678465	2 (2 0 0 0 0)
isocitrate dehydrogenase 2 (NADP+), mitochondrial precursor [Homo sapi	28178832	1 (1 0 0 0 0)
ferritin, heavy polypeptide 1 [Homo sapiens]	56682959	1 (1 0 0 0 0)
zinc finger, CDGSH-type domain 1 [Homo sapiens]	8923930	1 (1 0 0 0 0)
heat shock 70kDa protein 8 isoform 2 [Homo sapiens]	24234686	1 (1 0 0 0 0)
H2A histone family, member O [Homo sapiens]	4504251	3 (3 0 0 0 0)
unnamed protein product [Homo sapiens]	7020000	1 (1 0 0 0 0)
DREB_HUMAN Drebrin (Developmentally-regulated brain protein)	2498313	1 (1 0 0 0 0)
EPB41L3 protein [Homo sapiens]	13544009	3 (3 0 0 0 0)
A Chain A, The 1.9-A Crystal Structure Of The Noncollagenous (Nc1) Domain Of H	21466080	1 (1 0 0 0 0)
neurofilament, light polypeptide 68kDa, isoform CRA_b [Homo sapiens] [M	119584005	1 (1 0 0 0 0)
RAB3A, member RAS oncogene family [Homo sapiens]	4506367	1 (1 0 0 0 0)
profilin 2 isoform a [Homo sapiens]	16753215	1 (1 0 0 0 0)
AF383252_1 envelope glycoprotein [Human immunodeficiency virus type 1]	19773785	3 (1 0 2 0 0)
EBNA-2 co-activator variant [Homo sapiens]	62088600	2 (2 0 0 0 0)
CSE1 chromosome segregation 1-like protein [Homo sapiens]	29029559	1 (1 0 0 0 0)
tubulin, alpha 8 [Homo sapiens]	9507215	2 (1 0 0 1 0)
calreticulin precursor [Homo sapiens]	4757900	1 (1 0 0 0 0)
neighbor of BRCA1 gene 2, isoform CRA_b [Homo sapiens]	119581348	3 (1 2 0 0 0)
envelope glycoprotein [Human immunodeficiency virus type 1]	4679497	3 (3 0 0 0 0)
CD27-binding (Siva) protein isoform 1 [Homo sapiens]	11277468	1 (1 0 0 0 0)
envelope glycoprotein [Human immunodeficiency virus 1]	50981511	2 (2 0 0 0 0)
contactin associated protein 1 [Homo sapiens]	4505463	1 (1 0 0 0 0)
lanthionine synthetase C-like protein 1 [Homo sapiens]	5174445	4 (4 0 0 0 0)
heterogeneous nuclear ribonucleoprotein K [Mus musculus]	13384620	1 (1 0 0 0 0)
Thy-1 cell surface antigen [Homo sapiens]	19923362	2 (2 0 0 0 0)
NADH dehydrogenase (ubiquinone) 1 alpha subcomplex, 7, 14.5kDa [Pa	120952308	1 (1 0 0 0 0)
karyopherin beta 1 [Homo sapiens]	19923142	2 (2 0 0 0 0)
eukaryotic translation elongation factor 1 alpha 2 [Homo sapiens]	4503475	1 (1 0 0 0 0)
neurofilament-66; NF-66 [Homo sapiens]	994844	2 (2 0 0 0 0)
hypothetical protein [Homo sapiens]	31874254	1 (1 0 0 0 0)
A Chain A, Crystal Structure Of Truncated Human Rhogdi Quadruple Mutant	14278159	2 (2 0 0 0 0)
nef protein [Human immunodeficiency virus 1]	56783219	1 (1 0 0 0 0)
HGSNAT protein [Homo sapiens]	27469769	1 (1 0 0 0 0)
MHC class I antigen [Homo sapiens]	45157139	3 (1 1 0 1 0)
cytochrome c oxidase subunit VIIa polypeptide 2 (liver) precursor [Homo	4502989	1 (1 0 0 0 0)
XIAP associated factor-1 (ZAP-1) [Homo sapiens] [MA	1869901	2 (1 0 0 1 0)
alpha-spectrin [Homo sapiens]	829111	1 (1 0 0 0 0)
vpu protein [Human immunodeficiency virus type 1]	11321004	9 (3 5 1 0 0)
envelope protein [Human immunodeficiency virus 1]	11124717	1 (1 0 0 0 0)
polyubiquitin [Homo sapiens]	2627129	1 (1 0 0 0 0)
gp160 [Human immunodeficiency virus 1]	18996230	1 (1 0 0 0 0)
E1B 55K [Human adenovirus 5]	56160532	1 (1 0 0 0 0)
unnamed protein product [Homo sapiens]	7020238	1 (1 0 0 0 0)
seryl-tRNA synthetase 2 [Homo sapiens]	8923421	1 (1 0 0 0 0)
heterogeneous nuclear ribonucleoprotein A3 [Homo sapiens]	34740329	1 (1 0 0 0 0)
adenylyl cyclase-associated protein [Homo sapiens]	5453595	1 (1 0 0 0 0)
hypothetical protein [Homo sapiens]	34365210	2 (0 0 1 1 0)
unnamed protein product [Homo sapiens]	7022992	1 (1 0 0 0 0)
envelope glycoprotein [Human immunodeficiency virus 1]	35396916	1 (1 0 0 0 0)
Rb binding protein homolog [Homo sapiens]	5257005	2 (0 1 0 0 1)
hCG2036764, isoform CRA_a [Homo sapiens]	119569572	2 (1 1 0 0 0)
envelope glycoprotein [Human immunodeficiency virus 1]	110893742	1 (1 0 0 0 0)
ATP synthase, H+ transporting, mitochondrial F1 complex, delta subunit	4502297	1 (1 0 0 0 0)
NADH dehydrogenase (ubiquinone) 1 alpha subcomplex, 5 [Homo sapiens]	4826848	1 (1 0 0 0 0)
pol protein [Human immunodeficiency virus 1]	67937713	1 (1 0 0 0 0)
A Chain A, Crystal Structure Of Dictyostelium Discoideum Actin Complexed With	28374049	1 (1 0 0 0 0)
tubulin, beta 5 [Mus musculus]	7106439	4 (4 0 0 0 0)
erythrocyte membrane protein 4.1N [Homo sapiens] [M	16356663	1 (1 0 0 0 0)
H2A histone family, member A [Homo sapiens]	10645195	2 (2 0 0 0 0)
hCG1644400 [Homo sapiens]	119590312	2 (2 0 0 0 0)
N-ethylmaleimide-sensitive factor [Homo sapiens] [M	21040484	1 (1 0 0 0 0)
envelope glycoprotein [Human immunodeficiency virus type 1]	14193890	1 (1 0 0 0 0)
hCG2042107 [Homo sapiens]	119623322	2 (2 0 0 0 0)
guanine nucleotide binding protein (G protein) alpha 12 [Homo sapiens]	42476111	1 (1 0 0 0 0)
ring finger and CCCH-type zinc finger domains 2 [Homo sapiens]	9256537	2 (1 1 0 0 0)
envelope glycoprotein [Human immunodeficiency virus 1]	37362866	1 (1 0 0 0 0)
hypothetical protein PBCV1_A682L [Paramecium bursaria Chlorella virus 1	9632186	1 (1 0 0 0 0)
gag protein [Human immunodeficiency virus 1]	56608695	3 (2 0 1 0 0)
gag protein [Human immunodeficiency virus 1]	124389864	1 (1 0 0 0 0)
envelope gene [Human immunodeficiency virus 1]	510517	1 (1 0 0 0 0)
A Chain A, Cyclophilin A Complexed With Dipeptide Gly-Pro	1633054	1 (1 0 0 0 0)
MTFR1_HUMAN Mitochondrial fission regulator 1 (Chondrocyte protein with a pol	73920234	1 (1 0 0 0 0)
gp41 [Human immunodeficiency virus 1]	8920022	1 (1 0 0 0 0)
FLICE-like inhibitory protein short form [Homo sapiens]	2253681	4 (2 0 1 0 1)
unnamed protein product [Homo sapiens]	37610	1 (1 0 0 0 0)
glutathione S-transferase omega 2 [Homo sapiens]	38016131	1 (1 0 0 0 0)
hCG1790806, isoform CRA_a [Homo sapiens]	119628831	1 (1 0 0 0 0)
sodium channel, voltage-gated, type II, alpha isoform 1 [Homo sapiens]	93141210	1 (1 0 0 0 0)
envelope glycoprotein [Human immunodeficiency virus 1]	28916192	1 (1 0 0 0 0)
gag protein [Human immunodeficiency virus type 1] [	12745855	1 (1 0 0 0 0)
ribonuclease, RNase A family, 10 (non-active) [Homo sapiens]	61175227	1 (1 0 0 0 0)
envelope glycoprotein [Human immunodeficiency virus type 1]	13625348	1 (1 0 0 0 0)
envelope glycoprotein [Human immunodeficiency virus 1]	82571413	2 (2 0 0 0 0)
guanine nucleotide binding protein (G protein), alpha inhibiting activi	4504041	1 (1 0 0 0 0)
immunoglobulin heavy chain VHDJ region [Homo sapiens]	21670775	1 (1 0 0 0 0)
aconitase 2 precursor [Homo sapiens]	4501867	1 (1 0 0 0 0)
human leucocyte antigen [Homo sapiens]	1702892	1 (1 0 0 0 0)
H2A histone family, member Z [Homo sapiens]	4504255	1 (1 0 0 0 0)
TCDD-inducible poly(ADP-ribose) polymerase [Homo sapiens]	38524594	1 (1 0 0 0 0)
WHSC1L1 protein isoform short [Homo sapiens]	13699813	2 (0 1 0 0 1)
tetratricopeptide repeat domain 7B, isoform CRA_b [Homo sapiens]	119601840	1 (1 0 0 0 0)
envelope glycoprotein [Human immunodeficiency virus 1]	29422938	1 (1 0 0 0 0)
SC24B_HUMAN Protein transport protein Sec24B (SEC24-related protein B)	13124510	1 (1 0 0 0 0)
envelope glycoprotein [Human immunodeficiency virus 1]	38260759	2 (1 0 1 0 0)
reverse transcriptase [Human immunodeficiency virus type 1]	13506493	1 (1 0 0 0 0)
hCG2042391 [Homo sapiens]	119599792	1 (1 0 0 0 0)
envelope glycoprotein [Human immunodeficiency virus 1]	87245474	1 (1 0 0 0 0)
ubiquinol-cytochrome c reductase core protein I [Homo sapiens]	46593007	1 (1 0 0 0 0)
KIAA0980 protein, isoform CRA_c [Homo sapiens] [MA	119630489	2 (0 0 1 1 0)
P_HUMAN P protein (Melanocyte-specific transporter protein) (Pink-eyed diluti	90110050	2 (0 1 0 0 1)
ubiquitin specific protease 18 [Homo sapiens]	32313610	1 (1 0 0 0 0)
S38395 T-cell receptor beta chain precursor - human (fragment)	481253	1 (1 0 0 0 0)
GLP1 [Homo sapiens]	14211561	1 (1 0 0 0 0)
LIM domains containing 1 [Homo sapiens]	7657307	1 (1 0 0 0 0)
envelope protein [Human endogenous retrovirus K] [MAS	3150441	2 (1 1 0 0 0)
FBXL11 protein [Homo sapiens]	71297126	1 (1 0 0 0 0)
envelope glycoprotein [Human immunodeficiency virus 1]	30314753	5 (1 2 0 2 0)
group IVB cytosolic phospholipase A2 beta splice variant 2 [Homo sapien	100215613	1 (1 0 0 0 0)
adaptor protein complex AP-2, mu1 [Mus musculus]	6753074	1 (1 0 0 0 0)
human epididymal protein 2 [Homo sapiens]	46250521	1 (1 0 0 0 0)
immunoglobulin heavy chain variable region [Homo sapiens]	27753165	4 (1 1 2 0 0)
solute carrier family 6 (neurotransmitter transporter, creatine), membe	5032097	1 (1 0 0 0 0)
immunoglobulin heavy chain VHDJ region [Homo sapiens]	21670203	1 (1 0 0 0 0)
single-strand-selective monofunctional uracil-DNA glycosylase 1 [Homo s	7657597	3 (0 0 2 1 0)
gp120 protein [Human immunodeficiency virus 1] [MA	34786182	1 (1 0 0 0 0)
PLST_HUMAN Plastin-3 (T-plastin)	2506254	2 (0 0 1 1 0)
immunoglobulin G fragment Fab New heavy chain, IgG1 [human, Peptide Partia	260394	1 (1 0 0 0 0)
capsid maturation protease [Human herpesvirus 3]	9625908	2 (0 0 1 1 0)
hCG1791816 [Homo sapiens]	119578561	1 (1 0 0 0 0)
alpha 1 type VII collagen precursor variant [Homo sapiens]	62088870	1 (1 0 0 0 0)
envelope polyprotein [Human immunodeficiency virus 2]	732726	1 (1 0 0 0 0)
hCG2038810 [Homo sapiens]	119567845	3 (1 1 0 1 0)
unnamed protein product [Homo sapiens]	7022504	1 (1 0 0 0 0)
immunoglobulin IgM heavy chain variable region [Homo sapiens]	6606159	1 (1 0 0 0 0)
KIAA1249 protein [Homo sapiens]	6330854	1 (1 0 0 0 0)
AF182000_2 Tas [Human spumaretrovirus]	6003543	1 (1 0 0 0 0)
A Chain A, Crystal Structure Of Human G[alpha]i1 Bound To The Goloco Motif Of	21465862	1 (1 0 0 0 0)
phospholipid hydroperoxide glutathione peroxidase [Homo sapiens]	825667	1 (1 0 0 0 0)
protein tyrosine phosphatase 4a2 [Mus musculus]	6679545	1 (1 0 0 0 0)
reverse transcriptase [Human immunodeficiency virus 1]	55705714	1 (1 0 0 0 0)
DLP1_HUMAN Decaprenyl-diphosphate synthase subunit 2 (Decaprenyl pyrophosphat	73620006	1 (1 0 0 0 0)
transmembrane protein 185A [Homo sapiens]	22296884	1 (1 0 0 0 0)
calcium/calmodulin-dependent protein kinase IG [Homo sapiens]	56202635	1 (1 0 0 0 0)
calreticulin=calcium binding protein [human, placenta, Peptide Partial, 98	913156	1 (1 0 0 0 0)
hypothetical protein LOC339145 [Homo sapiens]	38348294	2 (0 1 0 0 1)
US26 [Human herpesvirus 5 strain AD169]	9625862	1 (1 0 0 0 0)
Y chromosome chromodomain protein 1, telomeric isoform a [Homo sapiens	25453481	1 (1 0 0 0 0)
eukaryotic translation initiation factor 4A isoform 1 [Homo sapiens]	4503529	1 (1 0 0 0 0)
reverse transcriptase [Human immunodeficiency virus 1]	55706914	1 (1 0 0 0 0)
AF202637_1 PP3111 [Homo sapiens]	10732650	1 (1 0 0 0 0)
U4 [Human herpesvirus 7]	51874230	1 (1 0 0 0 0)
glycoprotein [Human metapneumovirus]	33243422	1 (1 0 0 0 0)
fusion, derived from t(12;16) malignant liposarcoma (human), isoform CR	148685671	1 (1 0 0 0 0)
unnamed protein product [Homo sapiens]	34536215	1 (1 0 0 0 0)
KIAA1653 protein [Homo sapiens]	13359179	1 (1 0 0 0 0)
cadherin [Homo sapiens]	2281027	1 (1 0 0 0 0)
hCG2024326, isoform CRA_d [Homo sapiens]	119574564	1 (1 0 0 0 0)
coronin, actin binding protein, 1A [Homo sapiens]	5902134	1 (1 0 0 0 0)
envelope glycoprotein [Human immunodeficiency virus 1]	28629401	1 (1 0 0 0 0)
gp120 protein [Human immunodeficiency virus 1] [MA	34786638	1 (1 0 0 0 0)
NCAP_PI3H4 Nucleoprotein (Protein N) (Nucleocapsid protein) (NP protein)	127913	1 (1 0 0 0 0)
hCG2043519 [Homo sapiens]	119628824	1 (1 0 0 0 0)
C18orf21 protein [Homo sapiens]	76097859	1 (1 0 0 0 0)
gag protein [Human immunodeficiency virus 1]	7416342	2 (0 0 1 1 0)
gag protein [Human immunodeficiency virus 1]	67984037	2 (0 1 0 0 1)
human type XVIII collagen [Homo sapiens]	7717447	1 (1 0 0 0 0)
protein tyrosine phosphatase, receptor type, C isoform 1 precursor [Ho	18641347	2 (0 1 0 0 1)
unnamed protein product [Homo sapiens]	10437135	1 (1 0 0 0 0)
hCG2036928, isoform CRA_b [Homo sapiens]	119629008	1 (1 0 0 0 0)
K1 glycoprotein [Human herpesvirus 8]	52631373	2 (1 0 0 1 0)
potassium channel tetramerisation domain containing 4 [Homo sapiens]	146198864	1 (1 0 0 0 0)
integrin, beta 8 precursor [Homo sapiens]	4504779	3 (0 1 0 0 2)
WNT5A_HUMAN Protein Wnt-5a precursor	731157	1 (1 0 0 0 0)
envelope glycoprotein gp120 [Human immunodeficiency virus 1]	85663459	1 (1 0 0 0 0)
nuclear protein in testis [Homo sapiens]	50233787	3 (1 0 1 0 1)
A Chain A, Up1, The Two Rna-Recognition Motif Domain Of Hnrnp A1	20664272	1 (1 0 0 0 0)
G0/G1switch 2 [Homo sapiens]	7657104	1 (1 0 0 0 0)
envelope glycoprotein [Human immunodeficiency virus 1]	89477248	1 (1 0 0 0 0)
ribosomal protein L7 [Homo sapiens]	35903	1 (1 0 0 0 0)
nef protein [Human immunodeficiency virus 1]	73913802	1 (1 0 0 0 0)
hypothetical protein [Homo sapiens]	31874050	1 (1 0 0 0 0)
hCG2045868 [Homo sapiens]	119632186	1 (1 0 0 0 0)
WD repeat domain 44 protein [Homo sapiens]	45238858	1 (1 0 0 0 0)
FAM62C protein [Homo sapiens]	22713412	1 (1 0 0 0 0)
reverse transcriptase [Human immunodeficiency virus 1]	21435283	1 (1 0 0 0 0)
unnamed protein product [Homo sapiens]	7019889	2 (0 0 1 1 0)
unnamed protein product [Homo sapiens]	10439505	1 (1 0 0 0 0)
NmrA-like protein [Dictyostelium discoideum AX4]	66823091	1 (1 0 0 0 0)
envelope glycoprotein V2 region [Human immunodeficiency virus type 1] [MA	6690805	1 (1 0 0 0 0)
MOBP [Homo sapiens]	1408050	1 (1 0 0 0 0)
Putative protein of unknown function with similarity to human PEX5Rp (p	6323660	1 (1 0 0 0 0)
envelope glycoprotein [Human immunodeficiency virus 1]	33411168	2 (1 0 0 0 1)
HDAC5_HUMAN Histone deacetylase 5 (HD5) (Antigen NY-CO-9)	10720027	1 (1 0 0 0 0)
AF119917_46 PRO2521 [Homo sapiens]	7770205	1 (1 0 0 0 0)
hypothetical protein LOC79919 isoform 1 [Homo sapiens]	146198549	1 (1 0 0 0 0)
truncated pol protein [Human immunodeficiency virus 1]	87116002	1 (1 0 0 0 0)
Dynamin 1 [Homo sapiens]	71052112	1 (0 1 0 0 0)
envelope glycoprotein [Human immunodeficiency virus 1]	38018627	1 (0 1 0 0 0)
S31503 H+/K+-exchanging ATPase (EC 3.6.3.10) ATP1AL1 - human (fragment)	346261	1 (0 1 0 0 0)
VP-1 capsid protein [Human poliovirus 1]	12231217	3 (0 3 0 0 0)
WMBEHQ UL5 protein - human herpesvirus 2 (strain HG52) (fragment)	74001	2 (0 2 0 0 0)
Na,K-ATPase catalytic subunit alpha-A protein [Homo sapiens]	5919228	2 (0 2 0 0 0)
LATS homolog 1 [Homo sapiens]	4758666	2 (1 1 0 0 0)
actin-like protein [Homo sapiens]	62421077	3 (0 3 0 0 0)
oleoyl-ACP hydrolase isoform 2 [Homo sapiens]	89257335	1 (0 1 0 0 0)
unnamed protein product [Homo sapiens]	37138	2 (0 0 0 2 0)
unnamed protein product [Homo sapiens]	22760140	1 (0 1 0 0 0)
ubiquitin and ribosomal protein L40 precursor [Homo sapiens]	4507761	1 (0 1 0 0 0)
envelope glycoprotein [Human immunodeficiency virus 1]	86560181	3 (0 2 1 0 0)
protocadherin beta 4 precursor [Homo sapiens]	9256616	6 (0 0 4 1 1)
AF484489_7 envelope glycoprotein [Human immunodeficiency virus 1]	25166747	5 (0 0 0 3 2)
hair type II basic keratin [Homo sapiens]	1181996	1 (0 1 0 0 0)
envelope glycoprotein [Human immunodeficiency virus 1]	87246677	1 (0 1 0 0 0)
orf [Homo sapiens]	804996	3 (0 2 1 0 0)
AF119819_8 env polyprotein [Human immunodeficiency virus type 1]	5059048	1 (0 1 0 0 0)
KIAA0822 protein [Homo sapiens]	40788374	2 (0 0 1 0 1)
protease [Human immunodeficiency virus 1]	63015070	7 (4 2 0 1 0)
chromosome 10 open reading frame 90, isoform CRA_a [Homo sapiens]	119569585	1 (0 1 0 0 0)
AF512538_3 fusion glycoprotein [Human respiratory syncytial virus]	21263086	2 (0 2 0 0 0)
ameloblastin precursor [Homo sapiens]	7706067	2 (0 0 1 0 1)
reverse transcriptase [Human immunodeficiency virus type 1]	4808783	1 (0 1 0 0 0)
pol protein [Human immunodeficiency virus 1]	42717248	2 (0 1 0 1 0)
envelope glycoprotein [Human immunodeficiency virus 1]	37682547	7 (0 0 2 4 1)
BCR/ABL chimeric fusion peptide [Homo sapiens] [MAS	4033557	2 (0 0 1 0 1)
annexin I [Homo sapiens]	4502101	2 (0 0 1 0 1)
X Chain X, Crystal Structure Of B. Anthracis Protective Antigen Complexed With	51247574	2 (0 1 1 0 0)
pol protein [Human immunodeficiency virus 1]	14537704	1 (0 1 0 0 0)
S34775 nicotinic acetylcholine receptor epsilon chain precursor - human	479584	1 (0 1 0 0 0)
neuroblastoma apoptosis-related protease [Homo sapiens]	68032982	2 (0 0 1 0 1)
ADP-ribosylation factor GTPase activating protein 1 isoform a variant [	62898415	2 (0 1 1 0 0)
envelope glycoprotein [Human immunodeficiency virus 1]	148788542	2 (0 1 0 1 0)
immunoglobulin mu heavy chain [Homo sapiens]	54780402	1 (0 1 0 0 0)
parkin isoform 3 [Homo sapiens]	7669540	6 (0 2 1 2 1)
OTTHUMP00000017301 [Homo sapiens]	57208690	1 (0 1 0 0 0)
envelope glycoprotein [Human immunodeficiency virus 1]	48728023	1 (0 1 0 0 0)
AF383235_1 envelope glycoprotein [Human immunodeficiency virus type 1] [M	19773751	3 (2 1 0 0 0)
immunoglobulin heavy chain variable region [Homo sapiens]	112700376	2 (0 1 0 1 0)
E6 protein [Human papillomavirus type 95]	40804521	1 (0 1 0 0 0)
unnamed protein product [Homo sapiens]	10436240	4 (1 2 1 0 0)
pol protein [Human immunodeficiency virus type 1] [M	9938223	2 (0 1 1 0 0)
myozenin 1 [Homo sapiens]	10864053	1 (0 1 0 0 0)
calsyntenin 2 [Homo sapiens]	11545861	3 (0 0 0 3 0)
CBPA6_HUMAN Carboxypeptidase A6 precursor (Carboxypeptidase B)	85683250	1 (0 1 0 0 0)
cytochrome P450, family 3, subfamily A, polypeptide 43 isoform 2 [Homo	16933533	1 (0 1 0 0 0)
envelope glycoprotein [Human immunodeficiency virus type 1]	4091225	2 (0 1 0 1 0)
pol protein [Human immunodeficiency virus type 1] [	13604462	1 (0 1 0 0 0)
p17 protein [Human immunodeficiency virus type 1] [M	6003152	1 (0 1 0 0 0)
actin-like 6A isoform 1 [Homo sapiens]	4757718	1 (0 1 0 0 0)
mortality factor 4 [Homo sapiens]	6996928	1 (0 1 0 0 0)
exterior membrane protein gp120 [Human immunodeficiency virus 1]	7258436	3 (0 1 1 0 1)
prostate tumor overexpressed gene 1, isoform CRA_j [Homo sapiens]	119572946	1 (0 1 0 0 0)
envelope glycoprotein [Human immunodeficiency virus 1]	26518644	1 (0 1 0 0 0)
TRIO and F-actin binding protein, isoform CRA_e [Homo sapiens]	119580589	1 (0 1 0 0 0)
atonal homolog 1 [Homo sapiens]	4885075	2 (0 0 0 2 0)
ribosomal protein L24, isoform CRA_e [Homo sapiens]	119600190	1 (0 1 0 0 0)
immunoglobulin heavy chain variable region [Homo sapiens]	118406051	1 (0 1 0 0 0)
hCG2038794 [Homo sapiens]	119628605	1 (0 1 0 0 0)
immunoglobulin kappa light chain variable region [Homo sapiens]	4378292	3 (1 2 0 0 0)
Na+/K+ -ATPase beta 1 subunit isoform b [Homo sapiens]	49574489	1 (0 1 0 0 0)
AF286232_8 envelope glycoprotein [Human immunodeficiency virus type 1] [M	13569305	1 (0 1 0 0 0)
GPRA isoform D [Homo sapiens]	34596872	1 (0 1 0 0 0)
hCG2007637, isoform CRA_a [Homo sapiens]	119629769	3 (0 2 1 0 0)
serine peptidase inhibitor, Kunitz type 1 isoform 1 precursor [Homo sa	32313599	1 (0 1 0 0 0)
syntaxin 3A, isoform CRA_b [Homo sapiens]	119594260	1 (0 1 0 0 0)
pol protein [Human immunodeficiency virus 1]	55735866	1 (0 1 0 0 0)
ribosomal protein L35a pseudogene 3 [Homo sapiens]	55959580	1 (0 1 0 0 0)
gp120 [Human immunodeficiency virus type 1]	3598946	1 (0 1 0 0 0)
zinc finger protein 652 [Homo sapiens]	7662384	1 (0 1 0 0 0)
unnamed protein product [Homo sapiens]	14041957	1 (0 1 0 0 0)
immunoglobulin heavy chain [Homo sapiens]	3986318	1 (0 1 0 0 0)
capsid protein VP1 [Human poliovirus 1]	7008422	1 (0 1 0 0 0)
Hypothetical protein LOC283932 [Homo sapiens]	76780281	1 (0 1 0 0 0)
unnamed protein product [Homo sapiens]	21756795	1 (0 1 0 0 0)
RYNR_HUMAN [AA 4362- 5032]; SKELETAL MUSCLE CALCIUM RELEASE CHANNEL [Homo	3845349	1 (0 1 0 0 0)
adaptor-related protein complex 2, alpha 2 subunit variant [Homo sapien	62088424	1 (0 1 0 0 0)
pol protein [Human immunodeficiency virus 1]	57547438	2 (0 0 1 0 1)
immunoglobulin heavy chain VHDJ region [Homo sapiens]	21668636	1 (0 1 0 0 0)
unnamed protein product [Homo sapiens]	28193116	1 (0 1 0 0 0)
homologue to a human gene expressed in the nervous system; bp 510-533: put	556329	1 (0 1 0 0 0)
PSB5_HUMAN Proteasome subunit beta type 5 precursor (Proteasome epsilon chain)	1172607	1 (0 1 0 0 0)
NT6G_HUMAN Putative neurotrophin-6 gamma (NT-6 gamma)	462745	1 (0 1 0 0 0)
hypothetical protein [Homo sapiens]	21740071	3 (0 0 0 1 2)
envelope glycoprotein [Human immunodeficiency virus 1]	37702613	1 (0 1 0 0 0)
hCG1653855 [Homo sapiens]	119598864	1 (0 1 0 0 0)
toll-like receptor 9 isoform A precursor [Homo sapiens]	8394456	1 (0 1 0 0 0)
hypothetical protein [Homo sapiens]	34365184	1 (0 1 0 0 0)
dopey family member 1 [Homo sapiens]	55957343	1 (0 1 0 0 0)
ADORA3 protein [Homo sapiens]	34783487	1 (0 1 0 0 0)
envelope glycoprotein gp105 [Human immunodeficiency virus 2]	8671152	1 (0 1 0 0 0)
immunoglobulin heavy chain variable region [Homo sapiens]	70798057	1 (0 1 0 0 0)
L3 23 kDa protease [Human adenovirus type 7]	51173319	1 (0 1 0 0 0)
envelope glycoprotein [Human immunodeficiency virus 1]	38491720	1 (0 1 0 0 0)
T-cell receptor V delta 1 [Homo sapiens]	14485049	1 (0 1 0 0 0)
TRAF2 and NCK interacting kinase [Homo sapiens]	55741807	2 (0 0 0 2 0)
envelope glycoprotein [Human immunodeficiency virus 1]	30843469	1 (0 1 0 0 0)
unnamed protein product [Homo sapiens]	21758612	1 (0 1 0 0 0)
envelope glycoprotein [Human immunodeficiency virus type 1]	6468027	1 (0 1 0 0 0)
AF139987_3 Wbscr1 alternative spliced product [Mus musculus]	4972951	1 (0 1 0 0 0)
HEAT repeat containing 4 [Homo sapiens]	42558270	2 (0 0 1 0 1)
actin-related protein T1 [Homo sapiens]	19923076	2 (0 0 0 2 0)
FLJ00227 protein [Homo sapiens]	18676656	1 (0 1 0 0 0)
unknown [Homo sapiens]	63990112	1 (0 1 0 0 0)
envelope glycoprotein [Human immunodeficiency virus 1]	55846258	1 (0 1 0 0 0)
I-kappa-B-related protein [Homo sapiens]	34304358	1 (0 1 0 0 0)
unnamed protein product [Homo sapiens]	34530655	1 (0 1 0 0 0)
programmed cell death 10 [Homo sapiens]	20127517	6 (1 2 3 0 0)
hypothetical protein [Human calicivirus Hu/NLV/Queen's Arms/Leeds/92/UK	14330431	12 (5 3 1 2 1)
upstream binding transcription factor, RNA polymerase I [Homo sapiens]	13397837	11 (0 3 3 3 2)
protease [Human immunodeficiency virus 1]	38350806	2 (0 1 1 0 0)
tubulin, alpha-like 3 [Homo sapiens]	119606853	14 (4 5 2 3 0)
unnamed protein product [Homo sapiens]	34532160	2 (0 1 1 0 0)
heat shock protein 90Bf [Homo sapiens]	61104919	2 (0 0 0 1 1)
envelope glycoprotein [Human immunodeficiency virus 1]	145342622	2 (0 1 1 0 0)
gp160 [Human immunodeficiency virus 1]	1668728	4 (0 1 1 1 1)
KIAA1374 protein [Homo sapiens]	7243129	2 (0 0 0 1 1)
hCG1642903, isoform CRA_b [Homo sapiens]	119630702	2 (0 0 0 1 1)
hypothetical protein [Homo sapiens]	31874763	2 (0 0 0 1 1)
immunoglobulin mu heavy chain [Homo sapiens]	54779543	2 (0 1 0 1 0)
AACS protein [Homo sapiens]	71297231	12 (0 7 0 2 3)
unnamed protein product [Homo sapiens]	10433842	6 (3 0 1 2 0)
phosphoinositide-3-kinase, class 2, beta polypeptide [Homo sapiens] [MA	55962145	2 (0 1 0 1 0)
AF470976_1 pol polyprotein [Human immunodeficiency virus type 1]	21686054	15 (1 6 2 3 3)
pol protein [Human immunodeficiency virus 1]	42717134	13 (0 5 2 2 4)
R-spondin family, member 4 isoform 2 precursor [Homo sapiens]	90970328	2 (1 0 0 0 1)
HSF1 protein [Homo sapiens]	76779260	2 (1 0 0 0 1)
tubulin, beta 1 [Mus musculus]	124430500	6 (0 1 3 1 1)
KIAA1163 protein [Homo sapiens]	6330167	2 (0 1 0 0 1)

## Sheet: CADASIL_4_FA
Description	P-value	Score	MW	Accession	Peptide (Hits)
heat shock 90kDa protein 1, beta [Homo sapiens]	2.6501e-12	36.1939	83212.2	20149594	5 (3 1 1 0 0)
KIAA0968 protein [Homo sapiens]	2.93654e-12	98.2011	58985.2	4589580	18 (15 1 1 1 0)
2',3'-cyclic-nucleotide 3'-phosphodiesterase (EC 3.1.4.37)	3.5828e-12	256.263	45070.4	180687	55 (50 0 1 3 1)
aquaporin 4 isoform a [Homo sapiens]	5.29798e-12	26.2229	34806.9	4502181	3 (2 0 1 0 0)
tubulin, beta 4 [Homo sapiens]	3.90955e-11	154.243	49553.9	21361322	54 (45 7 1 1 0)
hCG19802, isoform CRA_b [Homo sapiens]	4.51394e-11	20.1686	41043.2	119587277	2 (2 0 0 0 0)
K1C9_HUMAN Keratin, type I cytoskeletal 9 (Cytokeratin-9) (CK-9) (Keratin-9)	1.12638e-10	34.1929	62091.8	81175178	4 (3 0 0 1 0)
glyceraldehyde-3-phosphate dehydrogenase [Homo sapiens]	1.23282e-10	50.2453	36030.4	7669492	10 (10 0 0 0 0)
tubulin, beta, 4 [Homo sapiens]	2.114e-10	114.241	50400.3	50592996	24 (14 8 2 0 0)
brain creatine kinase [Homo sapiens]	2.86404e-10	124.263	42617.4	21536286	38 (34 0 1 3 0)
hypothetical protein ( (L11645) alpha-tubulin [Homo sapiens] ) [Neuros	2.98376e-10	20.2619	10326.7	85091443	3 (3 0 0 0 0)
A40671 dynamin, internal form 1, long C-terminal form - human [M	3.16205e-10	74.2318	97201	539580	9 (7 0 0 0 2)
ferritin, light polypeptide [Homo sapiens]	3.58323e-10	110.212	20007.1	20149498	39 (32 2 1 2 2)
tubulin, alpha 1B [Mus musculus]	4.92735e-10	50.267	50119.6	34740335	16 (16 0 0 0 0)
KIAA0338 [Homo sapiens]	5.53684e-10	60.1989	103516	2224617	6 (6 0 0 0 0)
ferritin, heavy polypeptide 1 [Homo sapiens]	1.10234e-09	106.305	21212.3	56682959	66 (57 3 3 2 1)
ubiquinol-cytochrome c reductase core protein II [Homo sapiens]	1.44147e-09	30.168	48412.9	50592988	4 (4 0 0 0 0)
prostaglandin H2 D-isomerase [Homo sapiens]	1.50356e-09	20.1561	21015.3	32171249	2 (2 0 0 0 0)
A Chain A, Crystal Structure Of A DictyosteliumTETRAHYMENA CHIMERA Actin (Mutan	1.93454e-09	78.192	41719.9	7245526	21 (18 3 0 0 0)
glial fibrillary acidic protein [Homo sapiens]	2.2236e-09	242.213	49849.7	4503979	44 (37 1 0 4 2)
ubiquitin carboxyl-terminal esterase L1 (ubiquitin thiolesterase) [Hom	2.85266e-09	40.1527	24808.5	21361091	5 (5 0 0 0 0)
I38369 beta-tubulin - human (fragment)	3.0207e-09	234.251	48848.5	2119276	84 (73 7 2 0 2)
tubulin alpha 6 [Homo sapiens]	4.37539e-09	134.186	49863.5	14389309	52 (45 2 3 1 1)
GNAO2_HUMAN Guanine nucleotide-binding protein G(o) subunit alpha 2	4.99709e-09	56.1874	40061.1	60416433	7 (6 0 1 0 0)
protein kinase C, gamma [Homo sapiens]	5.95585e-09	38.1582	78397.3	13384594	6 (2 1 2 1 0)
gelsolin isoform a precursor [Homo sapiens]	6.69322e-09	34.2191	85644.2	4504165	5 (2 0 1 2 0)
unnamed protein product [Homo sapiens]	6.88965e-09	38.1871	69301.8	30023	5 (2 1 1 1 0)
unnamed protein product [Homo sapiens]	7.19485e-09	26.1894	57919.5	28940	3 (2 0 1 0 0)
microtubule-associated protein 1B isoform 1 [Homo sapiens]	7.70699e-09	60.2119	270452	5174525	7 (7 0 0 0 0)
syntaxin binding protein 1 isoform a [Homo sapiens]	7.97365e-09	84.2145	68692.3	4507297	13 (10 1 1 1 0)
unnamed protein product [Homo sapiens]	8.29325e-09	40.2187	72215.9	825646	9 (4 1 1 2 1)
tubulin, beta, 2 [Homo sapiens]	9.94488e-09	26.1894	49799	5174735	8 (4 2 2 0 0)
ATP synthase, H+ transporting, mitochondrial F1 complex, alpha subunit	1.02994e-08	76.1837	59713.7	4757810	13 (10 0 0 2 1)
tyrosine 3-monooxygenase/tryptophan 5-monooxygenase activation protein,	1.24439e-08	38.1903	28284.9	9507245	5 (4 1 0 0 0)
histone cluster 1, H1d [Homo sapiens]	1.37719e-08	30.1946	22336.3	4885377	9 (9 0 0 0 0)
neural cell adhesion molecule 1 isoform 3 [Homo sapiens]	1.52422e-08	18.2228	83718	115529478	2 (1 1 0 0 0)
neurofilament, light polypeptide 68kDa [Homo sapiens]	1.96534e-08	158.203	61479.3	105990539	23 (17 3 2 1 0)
microtubule-associated protein 2 [Homo sapiens]	2.14154e-08	142.237	199045	1850617	20 (15 2 1 2 0)
creatine kinase, mitochondrial 1B precursor [Homo sapiens]	2.37613e-08	18.0947	47007.3	10334859	2 (1 1 0 0 0)
tubulin, beta 2 [Homo sapiens]	3.09933e-08	50.1686	49875	4507729	16 (11 3 1 0 1)
ANK2_HUMAN Ankyrin-2 (Brain ankyrin) (Ankyrin-B) (Ankyrin, nonerythroid)	3.2539e-08	48.224	430079	1703310	7 (3 1 1 0 2)
neurofilament, medium polypeptide 150kDa [Homo sapiens]	3.90886e-08	138.172	102386	4885513	18 (11 2 2 0 3)
phosphofructokinase, platelet [Homo sapiens]	5.73974e-08	28.1903	85541.6	11321601	4 (1 1 1 1 0)
COL1A1 and PDGFB fusion transcript [Homo sapiens] [M	5.98805e-08	24.1772	36963.2	3288487	6 (4 1 0 1 0)
histone H2B [Homo sapiens]	7.8245e-08	60.1776	13927.6	1568557	15 (12 0 1 2 0)
unnamed protein product [Homo sapiens]	1.12056e-07	34.2001	49811	10433717	13 (5 4 4 0 0)
S68466 translation elongation factor EF-Tu-like protein P43 precursor, mitochondria	1.3142e-07	14.2281	49502.2	7443384	2 (1 0 0 1 0)
N-ethylmaleimide-sensitive factor [Homo sapiens]	1.57016e-07	50.1732	82602.2	11079228	6 (6 0 0 0 0)
beta actin [Homo sapiens]	1.93296e-07	20.1405	41709.7	4501885	2 (2 0 0 0 0)
keratin 10 [Homo sapiens]	2.21218e-07	18.1903	58791.5	40354192	2 (1 1 0 0 0)
dihydropyrimidinase-like 2 [Homo sapiens]	2.43035e-07	50.218	62254.7	4503377	5 (5 0 0 0 0)
vesicle-associated membrane protein 2 (synaptobrevin 2) [Homo sapiens]	2.51876e-07	24.108	12640.7	7657675	3 (2 0 0 1 0)
Chain , Human Complement Regulatory Protein Cd59 (Extracellular Region, Resid	3.23181e-07	10.1668	8080.61	515118	1 (1 0 0 0 0)
solute carrier family 25, member 5 [Homo sapiens]	3.50668e-07	10.1319	32874.2	4502099	1 (1 0 0 0 0)
SYN2_HUMAN Synapsin-2 (Synapsin II)	3.68113e-07	10.2191	62928.8	6686022	1 (1 0 0 0 0)
heterogeneous nuclear ribonucleoprotein A2/B1 isoform A2 [Homo sapiens]	4.33654e-07	10.1546	35983.8	4504447	1 (1 0 0 0 0)
brain abundant, membrane attached signal protein 1 [Homo sapiens]	4.55241e-07	74.1592	22680	30795231	10 (7 1 1 1 0)
solute carrier family 25 (mitochondrial carrier; adenine nucleotide tr	5.79961e-07	48.1744	33043.2	55749577	7 (6 1 0 0 0)
myelin basic protein isoform 1 [Homo sapiens]	5.83713e-07	108.192	21480	68509930	32 (28 1 2 1 0)
actin-like protein [Homo sapiens]	6.01516e-07	8.08586	11528.9	62421162	2 (0 1 1 0 0)
heat shock protein 90kDa alpha (cytosolic), class A member 1 isoform 2	6.9108e-07	24.1141	84620.7	40254816	5 (3 0 0 0 2)
KRHU2 keratin 1, type II, cytoskeletal - human	7.89695e-07	50.2063	65454.4	7428712	7 (2 3 0 1 1)
tyrosine 3/tryptophan 5 -monooxygenase activation protein, zeta polypep	8.69213e-07	26.146	27727.7	4507953	3 (2 0 1 0 0)
COL1A1 and PDGFB fusion transcript [Homo sapiens] [M	8.72012e-07	10.1379	9556.6	1888411	2 (2 0 0 0 0)
synaptosomal-associated protein 25 isoform SNAP25A [Homo sapiens]	1.02125e-06	20.1572	23321.2	18765733	3 (3 0 0 0 0)
internexin neuronal intermediate filament protein, alpha [Homo sapiens	1.02913e-06	72.1458	55357.5	14249342	8 (5 2 1 0 0)
guanine nucleotide-binding protein, beta-1 subunit [Mus musculus]	1.3073e-06	30.1571	37353	6680045	4 (3 1 0 0 0)
unknown [Homo sapiens]	1.36916e-06	8.05291	22434.6	2852648	1 (0 1 0 0 0)
H4 histone family, member A [Homo sapiens]	1.51098e-06	68.1585	11360.4	4504301	11 (8 1 1 0 1)
voltage-dependent anion channel 1 [Homo sapiens]	1.69661e-06	20.1629	30753.6	4507879	3 (3 0 0 0 0)
cytochrome c oxidase subunit Vb precursor [Homo sapiens]	1.99742e-06	30.1381	13686.9	17017988	3 (3 0 0 0 0)
Heterogeneous nuclear ribonucleoprotein C (C1/C2) [Homo sapiens]	2.18099e-06	10.1288	32373.9	14249959	1 (1 0 0 0 0)
MOBP [Homo sapiens]	2.3544e-06	10.2189	20956	1408050	1 (1 0 0 0 0)
synapsin I isoform Ia [Homo sapiens]	2.65342e-06	28.1336	74065.8	19924099	3 (2 1 0 0 0)
unnamed protein product [Homo sapiens]	2.85857e-06	40.1176	52406.5	21757045	4 (4 0 0 0 0)
synaptosomal-associated protein 25 [Mus musculus]	2.97812e-06	10.1298	23300.2	6755588	1 (1 0 0 0 0)
unnamed protein product [Homo sapiens]	3.98192e-06	16.1162	54221.2	22760572	4 (2 0 0 1 1)
palmitoyl-protein thioesterase 1 (ceroid-lipofuscinosis, neuronal 1, in	4.07375e-06	10.1168	34171.3	4506031	1 (1 0 0 0 0)
neurofilament-66; NF-66 [Homo sapiens]	4.11606e-06	20.2092	54875.2	994844	2 (2 0 0 0 0)
tubulin, alpha 4 [Mus musculus]	4.37782e-06	16.149	49892.4	6678467	3 (2 0 1 0 0)
calcium/calmodulin-dependent protein kinase II delta isoform 1 [Homo s	4.38017e-06	20.168	54093.6	26667183	2 (2 0 0 0 0)
K1045_HUMAN Protein KIAA1045	5.03348e-06	10.1513	45163.4	73621116	1 (1 0 0 0 0)
VDAC2 [Homo sapiens]	5.14944e-06	10.1812	30393	48146045	1 (1 0 0 0 0)
tubulin, alpha-like 3 [Homo sapiens]	6.20584e-06	46.1056	49876.8	13376181	11 (8 1 0 2 0)
calcium/calmodulin-dependent protein kinase IIB isoform 2 [Homo sapien	6.34295e-06	20.091	60348.7	26051206	2 (2 0 0 0 0)
LAMC1_HUMAN Laminin subunit gamma-1 precursor (Laminin B2 chain)	6.41693e-06	10.1601	177492	126369	1 (1 0 0 0 0)
KIAA0987 protein [Homo sapiens]	7.22846e-06	52.1932	123629	4589618	6 (4 0 2 0 0)
FBX37_HUMAN F-box only protein 37 (F-box/LRR-repeat protein 15)	8.2303e-06	8.07834	32523.3	51701452	2 (0 2 0 0 0)
polyprotein [Human coxsackievirus A4]	9.03354e-06	12.0809	23075.5	85543222	2 (0 1 0 1 0)
unnamed protein product [Homo sapiens]	9.10616e-06	30.1331	35738.8	32486	5 (2 1 2 0 0)
contactin 1 isoform 1 precursor [Homo sapiens]	1.07004e-05	30.1373	113249	28373117	3 (3 0 0 0 0)
fibrillin [Homo sapiens]	1.36719e-05	20.1223	325464	1335064	2 (2 0 0 0 0)
tubulin, alpha 1a [Mus musculus]	1.3897e-05	10.2244	49927.7	6678465	3 (2 1 0 0 0)
GDP dissociation inhibitor 1 [Homo sapiens]	1.60074e-05	20.0939	50550.2	4503971	6 (6 0 0 0 0)
A Chain A, Crystal Structure Of Caenorhabditis Elegans Mg-Atp Actin Complexed	1.68428e-05	10.1195	41637.7	14278147	1 (1 0 0 0 0)
A Chain A, Human Vimentin Coil 2b Fragment (Cys2)	1.8584e-05	26.1158	9901.82	20149836	3 (2 0 1 0 0)
unnamed protein product [Homo sapiens]	1.96729e-05	10.1477	14846.6	37848	1 (1 0 0 0 0)
S-laminin [Homo sapiens]	2.10344e-05	10.1374	66658.8	288401	1 (1 0 0 0 0)
proteolipid protein [Rattus norvegicus]	2.25547e-05	30.1475	30057.1	13591880	3 (3 0 0 0 0)
heterogeneous nuclear ribonucleoprotein H2 [Homo sapiens]	2.38031e-05	20.1596	49232.3	9624998	5 (1 0 2 1 1)
ATRB actin, skeletal muscle - rabbit	2.50992e-05	48.1702	41789.8	71611	10 (9 1 0 0 0)
SUCA_HUMAN Succinyl-CoA ligase [GDP-forming] subunit alpha, mitochondrial pre	2.64336e-05	28.1736	35025.2	20141765	3 (2 1 0 0 0)
prepro-alpha1(I) collagen [Homo sapiens]	2.86418e-05	22.1295	138827	1418928	3 (1 1 0 1 0)
ubiquitin and ribosomal protein L40 precursor [Homo sapiens]	2.9535e-05	30.1323	14719	4507761	4 (3 1 0 0 0)
polyubiquitin [Homo sapiens]	2.9535e-05	8.13233	68450.1	2627129	2 (1 1 0 0 0)
Cofactor required for Sp1 transcriptional activation, subunit 7, 70kDa	3.0708e-05	10.0886	65363.6	111494163	1 (1 0 0 0 0)
H1 histone family, member 0 [Homo sapiens]	3.42861e-05	70.1392	20850.2	4885371	9 (6 2 0 1 0)
crystallin, alpha B [Homo sapiens]	3.54907e-05	20.1844	20146.4	4503057	2 (2 0 0 0 0)
DCLK1_HUMAN Serine/threonine-protein kinase DCLK1 (Doublecortin-like and CAM k	3.57309e-05	32.113	82173	6225242	4 (2 0 2 0 0)
PREDICTED: similar to cytoplasmic beta-actin [Homo sapiens]	3.67932e-05	16.1257	17124.6	88942898	4 (0 2 1 1 0)
Na+/K+ -ATPase alpha 1 subunit isoform a proprotein [Homo sapiens]	3.78292e-05	20.1389	112824	21361181	2 (2 0 0 0 0)
DEAH (Asp-Glu-Ala-His) box polypeptide 40, isoform CRA_e [Homo sapiens]	3.78533e-05	10.099	50220	119614812	2 (1 1 0 0 0)
C-type lectin domain family 3 member A [Homo sapiens]	4.45491e-05	10.135	22218.5	148728186	2 (1 0 1 0 0)
unnamed protein product [Homo sapiens]	4.49053e-05	10.0846	16417.2	21754502	1 (1 0 0 0 0)
fibrillin 15 [Homo sapiens]	4.4932e-05	20.1392	56489.6	5924015	2 (2 0 0 0 0)
tyrosine 3/tryptophan 5 -monooxygenase activation protein, epsilon poly	4.56287e-05	18.1157	29155.4	5803225	3 (2 1 0 0 0)
RNA-binding protein S1, serine-rich domain [Homo sapiens]	5.2997e-05	12.1112	34187.7	6857826	3 (2 0 0 0 1)
calmodulin [Homo sapiens]	5.30267e-05	20.1249	17152	825635	2 (2 0 0 0 0)
protein kinase C, theta [Homo sapiens]	5.36079e-05	10.1205	81810.8	5453976	1 (1 0 0 0 0)
KIAA1708 [Homo sapiens]	5.49586e-05	42.1187	185022	30725047	7 (4 0 0 3 0)
voltage-dependent anion channel 3 [Homo sapiens]	6.00191e-05	10.0747	30639.3	25188179	1 (1 0 0 0 0)
CD2 molecule [Homo sapiens]	6.27795e-05	10.1016	39414.7	4502653	2 (0 1 0 0 1)
MRS2-like, magnesium homeostasis factor [Mus musculus]	6.82846e-05	16.0726	53963.6	61656188	3 (2 0 1 0 0)
unactive progesterone receptor, 23 kD [Homo sapiens]	6.84813e-05	10.1706	18685.4	23308579	1 (1 0 0 0 0)
phosphoglycerate mutase 1 (brain) [Homo sapiens]	6.90309e-05	10.077	28785.8	4505753	1 (1 0 0 0 0)
neurofilament, light polypeptide 68kDa, isoform CRA_b [Homo sapiens] [M	7.21164e-05	10.1519	56924	119584005	1 (1 0 0 0 0)
mysoin heavy chain 12 [Homo sapiens]	8.51628e-05	32.1589	215196	1770741	4 (2 0 2 0 0)
envelope glycoprotein [Human immunodeficiency virus 1]	9.0212e-05	12.0639	10558.5	88698251	2 (0 1 0 1 0)
Na+/K+ -ATPase alpha 2 subunit proprotein [Homo sapiens]	9.44344e-05	56.1553	112194	4502271	7 (4 3 0 0 0)
NADH dehydrogenase (ubiquinone) Fe-S protein 6, 13kDa (NADH-coenzyme Q	0.000103589	10.1394	13702.8	4758792	1 (1 0 0 0 0)
NOTC3_HUMAN Neurogenic locus notch homolog protein 3 precursor (Notch 3) [Con	0.000112938	48.1517	243493	20139284	5 (4 1 0 0 0)
myosin, heavy polypeptide 9, non-muscle [Homo sapiens]	0.000116706	32.1201	226391	12667788	5 (1 1 2 0 1)
homeobox A7 [Homo sapiens]	0.000118333	10.0447	25339.1	24497556	1 (1 0 0 0 0)
hypothetical protein [Homo sapiens]	0.000124243	10.0724	75422.7	52545715	1 (1 0 0 0 0)
AF471329_1 Ig heavy chain variable region, VH3 family [Homo sapiens] [MAS	0.000127157	8.06247	12885.4	33319202	1 (0 1 0 0 0)
tubulin, beta 5 [Mus musculus]	0.000129045	10.1129	49639	7106439	3 (3 0 0 0 0)
protease [Human immunodeficiency virus 1]	0.000135218	10.0836	24552.7	63096625	1 (1 0 0 0 0)
NADH dehydrogenase (ubiquinone) 1 alpha subcomplex, 5 [Homo sapiens]	0.000136433	20.0993	13450.2	4826848	2 (2 0 0 0 0)
pol protein [Human endogenous retrovirus K]	0.000140321	10.0997	83512.2	1780973	2 (0 1 0 0 1)
tubulin, alpha-like 3 [Homo sapiens]	0.000145496	8.07721	49875.8	119606853	2 (0 1 0 0 1)
KIAA0417 [Homo sapiens]	0.000158801	80.1615	78381.4	2887409	8 (8 0 0 0 0)
cytochrome c oxidase subunit VIIa polypeptide 2 (liver) precursor [Homo	0.000166842	10.1261	9390.1	4502989	1 (1 0 0 0 0)
collapsin response mediator protein 1 isoform 2 [Homo sapiens]	0.000173452	24.0962	62144.8	4503051	3 (2 0 0 1 0)
special AT-rich sequence binding protein 1 [Homo sapiens]	0.000197847	12.0567	85903.5	4506791	2 (0 0 2 0 0)
fibroblast growth factor 14 isoform 1B [Homo sapiens]	0.000198182	20.0789	28443.7	28872756	3 (2 0 0 1 0)
gag-pol polyprotein [Human immunodeficiency virus 1]	0.000199431	10.082	19453.2	42628618	1 (1 0 0 0 0)
hCG2038432 [Homo sapiens]	0.000203717	10.0851	11528.5	119607130	1 (1 0 0 0 0)
protocadherin beta 4 precursor [Homo sapiens]	0.000205801	8.0856	87216.5	9256616	2 (0 0 1 0 1)
hCG2029193 [Homo sapiens]	0.000209587	10.0698	6335.19	119602407	1 (1 0 0 0 0)
motile sperm domain containing 3 isoform a [Homo sapiens]	0.000216119	8.06363	25502.7	13122608	1 (0 1 0 0 0)
A Chain A, The 1.9-A Crystal Structure Of The Noncollagenous (Nc1) Domain Of H	0.000230838	10.1145	25314	21466080	1 (1 0 0 0 0)
nucleolar protein NOP5/NOP58 [Homo sapiens]	0.00023224	18.1251	59540.6	7706254	3 (1 0 0 2 0)
ras homolog gene family, member G [Mus musculus]	0.000255896	14.1037	21294.9	9625037	2 (1 0 0 1 0)
A Chain A, Crystal Structure Of Dictyostelium Discoideum Actin Complexed With	0.000258393	8.10269	41574.7	28374049	1 (0 1 0 0 0)
beta-neoendorphin-dynorphin preproprotein [Homo sapiens]	0.000265581	8.12273	28367.2	13270473	2 (0 1 0 0 1)
AF328787_1 ABC transporter member 7 [Homo sapiens] [	0.000272377	10.0694	234157	12656651	2 (1 0 1 0 0)
alpha3 type IV collagen [Homo sapiens]	0.000275779	20.0949	161798	13559798	4 (0 1 1 1 1)
ribosomal protein L29 [Homo sapiens]	0.000288162	10.182	17656	793843	2 (2 0 0 0 0)
FLJ00275 protein [Homo sapiens]	0.0002904	8.05122	41025.3	21748486	1 (0 1 0 0 0)
ADP-ribosylation factor GTPase activating protein 1 isoform a variant [	0.000297575	8.08615	44641.2	62898415	3 (0 1 1 0 1)
capsid protein [Human astrovirus 8]	0.000300187	10.058	85843.9	1045054	1 (1 0 0 0 0)
hCG1747788 [Homo sapiens]	0.00030894	12.1826	14554.8	119608911	6 (0 0 6 0 0)
unnamed protein product [Homo sapiens]	0.000311013	10.0537	95788.6	47077465	2 (0 0 1 1 0)
pol protein [Human immunodeficiency virus 1]	0.000314871	6.10591	56979.6	42717134	2 (0 1 1 0 0)
Tubulin, beta [Homo sapiens]	0.000317664	8.15075	49640	18088719	1 (0 1 0 0 0)
AT2B4_HUMAN Plasma membrane calcium-transporting ATPase 4 (PMCA4) (Plasma mem	0.000318777	20.1559	137833	14286105	2 (2 0 0 0 0)
phosphoglycerate mutase 2 (muscle) [Homo sapiens] [M	0.000322941	10.0951	28201.4	51094513	1 (1 0 0 0 0)
unnamed protein product [Homo sapiens]	0.000346235	8.05377	17478.8	14042637	1 (0 1 0 0 0)
nef protein [Human immunodeficiency virus 1]	0.000370417	10.0905	23510.5	31087630	1 (1 0 0 0 0)
calcium/calmodulin-dependent protein kinase II gamma isoform 1 [Mus mu	0.00038443	20.0829	59569.4	75991700	3 (1 0 1 1 0)
envelope glycoprotein [Human immunodeficiency virus 1]	0.000390966	16.0831	24297.1	108736724	2 (1 0 1 0 0)
hypothetical protein [Homo sapiens]	0.00039513	12.0851	39406	6714707	2 (0 0 2 0 0)
PREDICTED: hypothetical protein [Homo sapiens]	0.000397345	22.093	37280.7	113430801	4 (1 2 1 0 0)
envelope glycoprotein H [Human herpesvirus 3]	0.000400928	8.07712	93592.1	9625912	1 (0 1 0 0 0)
UTF1 [Homo sapiens]	0.000412314	8.07366	36539.3	3688604	2 (0 2 0 0 0)
envelope glycoprotein [Human immunodeficiency virus type 1]	0.000435006	2.1522	96768.6	17046569	3 (0 2 0 0 1)
hypothetical protein LOC169436 [Homo sapiens]	0.000437786	10.1186	75627.2	76563908	3 (2 1 0 0 0)
KIAA2032 protein [Homo sapiens]	0.000438976	8.08163	96485.8	29539553	1 (0 1 0 0 0)
PRAME family member 10 [Homo sapiens]	0.000440245	8.06108	53350.9	4160218	1 (0 1 0 0 0)
pol protein [Human immunodeficiency virus 1]	0.000462283	10.1137	10485.7	116274077	1 (1 0 0 0 0)
mitogen-activated protein kinase kinase kinase 11 [Homo sapiens]	0.000468182	12.0704	92630.5	4505195	2 (0 1 0 1 0)
KIAA0041 [Homo sapiens]	0.000479378	8.07436	88243.3	27529706	1 (0 1 0 0 0)
anti-Rh(D) antibody immunoglobulin heavy chain variable region [Homo sap	0.000484632	10.0501	14064.9	93007491	1 (1 0 0 0 0)
PREDICTED: similar to ribosomal protein S2 [Homo sapiens]	0.000492079	10.0978	29863.6	88976655	1 (1 0 0 0 0)
solute carrier family 17 (sodium-dependent inorganic phosphate cotrans	0.000498104	16.0675	64948.7	21322234	2 (0 2 0 0 0)
eukaryotic translation elongation factor 1 alpha 1 [Homo sapiens]	0.000526059	52.1217	50109.2	4503471	6 (4 1 0 1 0)
RTEL1_HUMAN Regulator of telomere elongation helicase 1 (Helicase-like protei	0.000527348	28.0583	152278	29427545	3 (2 1 0 0 0)
nef protein [Human immunodeficiency virus 1]	0.000533476	10.1596	23199.4	94538970	3 (2 0 0 1 0)
tat protein [Human immunodeficiency virus 1]	0.000535187	8.05784	11542.6	38491855	1 (0 1 0 0 0)
vacuolar H+ ATPase G1 [Homo sapiens]	0.000540659	10.0854	13749.1	4757818	1 (1 0 0 0 0)
hCG201417 [Homo sapiens]	0.000553352	10.1332	23658.7	119594542	2 (2 0 0 0 0)
H2A histone family, member A [Homo sapiens]	0.000553653	22.1353	14127	10645195	7 (5 0 2 0 0)
SHC (Src homology 2 domain containing) transforming protein 1 isoform p	0.000556543	4.05673	40931.8	62087278	2 (0 0 0 0 2)
GR AF-1 coactivator 3 [Homo sapiens]	0.000564844	10.0659	63812.6	7108917	1 (1 0 0 0 0)
micronovel [Homo sapiens]	0.000578868	10.0473	12847.6	37181622	1 (1 0 0 0 0)
myelin basic protein isoform 4 [Homo sapiens]	0.000582085	10.1218	17332.8	68509932	1 (1 0 0 0 0)
hypothetical protein LOC145376 [Homo sapiens]	0.000591593	24.0651	49408.4	27312029	3 (1 1 1 0 0)
DMN_HUMAN Desmuslin	0.00060411	26.0837	172662	20137613	5 (4 0 1 0 0)
unnamed protein product [Homo sapiens]	0.000614731	10.088	45528.6	21757343	2 (2 0 0 0 0)
clusterin isoform 2 [Homo sapiens]	0.000618348	28.129	52461.1	42740907	3 (2 1 0 0 0)
A Chain A, Human Plasminogen Activator Inhibitor Type-1 In Complex With A Penta	0.000620382	14.086	42799.9	4699714	2 (0 1 1 0 0)
N Chain N, Mutant Monomer Of Recombinant Human Hexokinase Type I Complexed With	0.000655623	42.1536	102383	7245424	7 (2 1 3 0 1)
melanoma antigen family E, 2 [Homo sapiens]	0.000667436	26.0854	60339.4	20162570	3 (1 2 0 0 0)
ortholog of human amyotrophic lateral sclerosis 2 (juvenile) chromosome	0.000674384	12.07	121706	56206789	3 (0 1 0 0 2)
envelope glycoprotein [Human immunodeficiency virus 1]	0.000693132	18.0982	35413.5	58760509	9 (3 2 1 0 3)
olfactory receptor, family 5, subfamily AK, member 2 [Homo sapiens]	0.000706174	10.0606	34603.6	52693941	1 (1 0 0 0 0)
PREDICTED: hypothetical protein [Homo sapiens]	0.000707766	16.0553	21128.4	113410972	2 (1 0 1 0 0)
dipeptidylpeptidase IV [Homo sapiens]	0.000724333	10.0565	88222.5	18765694	1 (1 0 0 0 0)
reverse transcriptase [Human immunodeficiency virus 1]	0.000733029	8.1929	32923	55705774	4 (0 3 1 0 0)
growth associated protein 43 [Homo sapiens]	0.000737263	30.1262	24787.9	4503911	5 (2 0 1 1 1)
hCG2043251, isoform CRA_a [Homo sapiens]	0.000759051	8.05902	16323.5	119575733	1 (0 1 0 0 0)
pol protein [Human immunodeficiency virus type 1] [M	0.000774195	8.05866	38963.7	4545155	1 (0 1 0 0 0)
sag [Human betaretrovirus]	0.000783622	8.05446	10634.4	32128383	1 (0 1 0 0 0)
ribosomal protein P2 [Homo sapiens]	0.000819814	12.1105	11657.9	4506671	2 (1 0 0 0 1)
hnRNP U protein [Homo sapiens]	0.000830884	24.1319	88890.2	32358	3 (2 0 0 1 0)
XAP-5 [Homo sapiens]	0.000869396	10.0472	32721.7	1203974	1 (1 0 0 0 0)
glycosylphosphatidylinositol phospholipase D [Homo sapiens]	0.000884454	12.0746	92304.1	20269065	2 (0 1 0 1 0)
envelope glycoprotein [Human immunodeficiency virus 1]	0.00089052	8.06616	46446.6	35396896	1 (0 1 0 0 0)
B Chain B, Crystal Structure Of Fibrinogen Fragment D	0.000920864	10.1307	37624.7	2781208	1 (1 0 0 0 0)
platelet coagulation factor XI precursor [Homo sapiens]	0.000938011	8.09317	70063.6	4503627	1 (0 1 0 0 0)
HMHA1 protein [Homo sapiens]	0.00096903	10.0486	124005	23272016	1 (1 0 0 0 0)
PREDICTED: hypothetical protein isoform 2 [Pan troglodytes]	0.000976683	2.09004	10614.5	55660998	3 (1 0 1 0 1)
hypothetical protein LOC345651 [Homo sapiens]	0.000983962	8.12895	41976	63055057	3 (0 1 2 0 0)
KIAA1247 protein [Homo sapiens]	0.000985652	10.052	102169	14133245	1 (1 0 0 0 0)
hCG2042376 [Homo sapiens]	0.000997272	6.07704	8746.49	119612767	2 (1 0 1 0 0)
AF161459_1 HSPC109 [Homo sapiens]	0.00105722	10.1115	43985.6	6841442	1 (1 0 0 0 0)
N-ethylmaleimide-sensitive factor attachment protein, gamma [Homo sapie	0.00109748	18.0657	34724.3	4505331	3 (0 2 0 0 1)
PREDICTED: hypothetical protein [Homo sapiens]	0.00112728	10.055	28544.9	89028372	1 (1 0 0 0 0)
A Chain A, Human Prion Protein	0.00112879	10.1134	22876.6	6730485	1 (1 0 0 0 0)
LAMC3_HUMAN Laminin subunit gamma-3 precursor (Laminin 12 gamma 3 subunit)	0.00116281	10.07	171940	17865497	1 (1 0 0 0 0)
2-hydroxyphytanoyl-CoA lyase [Homo sapiens]	0.00116602	10.0833	63685.4	6273457	2 (0 0 1 1 0)
heterogeneous nuclear ribonucleoprotein A3 [Homo sapiens]	0.00119968	10.1201	39570.5	34740329	1 (1 0 0 0 0)
envelope glycoprotein gp120 [Human immunodeficiency virus 1]	0.00120356	10.082	21825.7	11124991	2 (2 0 0 0 0)
envelope glycoprotein V3 region [Human immunodeficiency virus type 1]	0.00120491	8.09871	11583.9	6690979	2 (0 2 0 0 0)
33 kDa protein [Human adenovirus type 4]	0.00121971	10.1632	23080.5	57115823	7 (6 0 0 1 0)
neighbor of Punc E11 [Homo sapiens]	0.00123431	6.08619	134126	19882241	2 (0 0 0 1 1)
OK/KNS-CL.4 [Homo sapiens]	0.00124687	10.0505	12843.8	21104506	1 (1 0 0 0 0)
trophoblast glycoprotein [Homo sapiens]	0.00126442	8.06282	46002.8	5729718	1 (0 1 0 0 0)
PREDICTED: similar to CG2839-PA [Homo sapiens] [M	0.00128339	26.0989	300890	113428240	9 (2 4 0 2 1)
zinc finger, DHHC-type containing 11 [Homo sapiens]	0.00128723	28.0913	45945.4	13376150	3 (2 1 0 0 0)
unnamed protein product [Homo sapiens]	0.00132514	10.0777	33013.3	10437045	2 (0 0 1 1 0)
similar to t-complex 1; T-complex locus TCP-1; t-complex 1 (a murine tcp	0.00134681	22.0882	19812.7	51094756	27 (19 4 0 2 2)
cadherin 4, type 1 preproprotein [Homo sapiens]	0.00134755	8.13349	100218	14589893	1 (0 1 0 0 0)
AF154671_1 CRB1 [Homo sapiens]	0.00136428	10.0568	151312	6014482	1 (1 0 0 0 0)
growth arrest-specific 8 [Homo sapiens]	0.00137425	14.0792	56320.7	4503917	2 (0 1 1 0 0)
regulating synaptic membrane exocytosis 2 [Homo sapiens]	0.00139145	20.0769	132676	41281444	2 (2 0 0 0 0)
ADAMTS-like 5 [Homo sapiens]	0.00139987	8.04921	52013.8	47106073	1 (0 1 0 0 0)
tetraspanin 7 [Homo sapiens]	0.0014035	18.0525	27555.7	21265104	2 (1 1 0 0 0)
unnamed protein product [Homo sapiens]	0.00140681	10.1008	58882.9	18677024	1 (1 0 0 0 0)
parkin isoform 3 [Homo sapiens]	0.00141137	8.09528	35616.9	7669540	2 (0 2 0 0 0)
envelope glycoprotein [Human immunodeficiency virus 1]	0.00141553	10.0794	16224.2	67089787	1 (1 0 0 0 0)
hypothetical protein LOC389337 [Homo sapiens]	0.00141748	10.1016	76231.1	83715966	1 (1 0 0 0 0)
hypothetical protein LOC392395 [Homo sapiens]	0.00144091	12.0663	62847.5	61966775	2 (0 1 0 1 0)
prohibitin 2 [Homo sapiens]	0.0014629	12.0795	33275.9	6005854	2 (1 0 0 0 1)
gag protein [Human immunodeficiency virus 1]	0.00147468	10.0727	54845	32812028	1 (1 0 0 0 0)
KIAA1614 protein [Homo sapiens]	0.00149538	38.0962	128609	10047303	4 (3 1 0 0 0)
insulin receptor substrate-2 [Homo sapiens]	0.00150772	8.05808	136398	2809059	1 (0 1 0 0 0)
S03521 Ig kappa chain precursor V region (hybridoma PTF-02) - mouse (fragment)	0.00151119	10.0862	13889.2	110371	1 (1 0 0 0 0)
cerebellar degeneration-related protein 2-like [Mus musculus]	0.0015506	10.0848	53180	124286868	2 (2 0 0 0 0)
envelope glycoprotein [Human immunodeficiency virus type 1]	0.0015587	10.0745	11763.2	13183937	1 (1 0 0 0 0)
type IV collagen alpha 4 chain [Homo sapiens]	0.00155974	22.1204	163992	574806	4 (2 0 2 0 0)
immunoglobulin kappa light chain variable region [Homo sapiens]	0.00158233	8.08611	11276.6	4323864	1 (0 1 0 0 0)
K1 glycoprotein [Human herpesvirus 8]	0.00160367	10.0687	22370.8	56900766	1 (1 0 0 0 0)
CE152_HUMAN Centrosomal protein of 152 kDa (Cep152 protein)	0.00160862	16.1227	147252	62286590	3 (0 1 0 2 0)
unnamed protein product [Homo sapiens]	0.00161877	10.1208	20025.1	37610	1 (1 0 0 0 0)
hypothetical protein LOC115708 [Homo sapiens]	0.00163061	14.0699	31361.9	123173772	2 (0 1 1 0 0)
unnamed protein product [Homo sapiens]	0.00164534	8.08604	53171.9	14042809	1 (0 1 0 0 0)
hCG2040862 [Homo sapiens]	0.00168364	10.0517	7715.1	119623698	1 (1 0 0 0 0)
chaperonin containing TCP1, subunit 4 (delta) [Homo sapiens]	0.00168897	14.0725	57887.9	38455427	3 (0 1 2 0 0)
envelope glycoprotein [Human immunodeficiency virus 1]	0.00169752	10.0863	97531.9	113196552	1 (1 0 0 0 0)
unnamed protein product [Homo sapiens]	0.00175394	10.0618	54799.9	10434650	1 (1 0 0 0 0)
PREDICTED: SET domain containing 1B [Homo sapiens]	0.00176267	10.0949	235508	113423954	2 (0 1 0 0 1)
SMC4 structural maintenance of chromosomes 4-like 1 [Homo sapiens]	0.00176685	16.0999	147090	50658063	4 (1 1 1 0 1)
H3 histone, family 3A [Homo sapiens]	0.00176855	48.1148	15318.5	4504279	11 (6 2 1 2 0)
envelope glycoprotein [Human immunodeficiency virus type 1]	0.00177729	10.0723	9874.12	14165106	3 (1 2 0 0 0)
anaphase-promoting complex subunit 7 [Homo sapiens]	0.0017885	8.06063	63137	7705284	4 (1 1 1 0 1)
hCG1804255 [Homo sapiens]	0.00179296	10.072	9644.18	119586256	1 (1 0 0 0 0)
unnamed protein product [Homo sapiens]	0.00182287	20.0605	114961	21749523	3 (1 1 0 0 1)
hexon-associated protein [Human adenovirus A]	0.00185255	10.1051	64746.8	9626631	2 (1 1 0 0 0)
envelope glycoprotein [Human immunodeficiency virus type 1]	0.00191583	18.07	24680.7	23394720	3 (1 1 1 0 0)
capsid protein [Human herpesvirus 6]	0.00193766	8.06312	29600.2	451955	2 (0 0 0 2 0)
B Chain B, Structure Of The Fab Fragment From A Human Igm Cold Agglutinin	0.00194255	10.0574	25095.4	13096339	1 (1 0 0 0 0)
pol protein [Human immunodeficiency virus 1]	0.00195945	8.07521	32291	67577595	1 (0 1 0 0 0)
p24 [Human immunodeficiency virus 1]	0.00200687	8.06757	22529.4	7532678	1 (0 1 0 0 0)
I54326 G protein-coupled receptor kinase (EC 2.7.1.-) 4 isoform B - human	0.00202811	2.12602	57656	2135144	2 (1 0 0 0 1)
LPLUNC1 protein precursor [Homo sapiens]	0.00202877	26.0805	52408.6	40807482	3 (2 0 1 0 0)
H2A histone family, member Z [Homo sapiens]	0.00203438	20.0778	13544.5	4504255	8 (5 2 1 0 0)
PREDICTED: nucleoside diphosphate kinase type 6 isoform 5 [Pan troglo	0.00204553	10.0561	21128.8	114586637	1 (1 0 0 0 0)
immunoglobulin heavy chain complementarity-determining region 3 [Homo sa	0.00204845	6.08656	2628.23	29497780	2 (0 1 1 0 0)
ras interactor [Homo sapiens]	0.00205307	18.0934	84065.6	1695233	4 (1 0 1 2 0)
envelope glycoprotein [Human immunodeficiency virus type 1]	0.00205605	8.05606	9408.85	2854218	1 (0 1 0 0 0)
CD7 antigen (p41), isoform CRA_b [Homo sapiens] [M	0.00209089	14.0723	21031.6	119610170	2 (1 0 0 1 0)
PREDICTED: hypothetical protein [Homo sapiens]	0.0021556	12.1084	126393	113413249	4 (0 0 2 1 1)
integrin alpha M precursor [Homo sapiens]	0.00217076	14.0952	127099	88501734	2 (0 1 1 0 0)
CUE domain containing 2 [Homo sapiens]	0.00217144	10.0821	31989.1	148596996	1 (1 0 0 0 0)
PREDICTED: similar to eukaryotic translation initiation factor 3,	0.00219077	12.0823	74258.4	113421409	2 (1 0 0 0 1)
phosphodiesterase 6A, cGMP-specific, rod, alpha [Danio rerio]	0.00219174	12.0749	99466.5	55742280	3 (0 0 1 1 1)
hCG2042191 [Homo sapiens]	0.00219324	12.0837	38764	119600872	2 (1 0 0 0 1)
vIRF-2 [Human herpesvirus 8 type P]	0.00219631	10.0656	75042.9	139472851	1 (1 0 0 0 0)
clathrin heavy chain 1 [Homo sapiens]	0.00220041	28.0822	191492	4758012	4 (2 0 1 0 1)
RAB3C, member RAS oncogene family [Homo sapiens]	0.00221996	10.1025	25935.6	19923985	1 (1 0 0 0 0)
GBRA4_HUMAN Gamma-aminobutyric-acid receptor subunit alpha-4 precursor (GABA(A	0.00223581	8.05543	61600.6	1346079	2 (0 0 0 2 0)
ATP-binding cassette, sub-family C, member 4 [Homo sapiens]	0.00228051	10.093	149446	5031915	1 (1 0 0 0 0)
SMCR8 protein [Homo sapiens]	0.0022874	12.1027	93102.4	73487288	3 (0 0 1 1 1)
unknown [Homo sapiens]	0.00234132	8.03783	148916	17980447	1 (0 1 0 0 0)
similar to Piccolo protein (Aczonin) [Homo sapiens]	0.00235016	38.1236	410909	51094943	8 (1 1 2 0 4)
gag polyprotein [Human immunodeficiency virus 1] [	0.00235348	8.0688	24387.3	54792366	1 (0 1 0 0 0)
human immunodeficiency virus type I enhancer binding protein 2 [Homo	0.00235559	24.0869	268883	110347463	3 (1 1 1 0 0)
XPBE12 major antigenic structural protein p100 - human herpesvirus 6 (strain U1102)	0.0023661	24.0717	97126.1	7429131	4 (0 2 0 2 0)
nef protein [Human immunodeficiency virus 1]	0.002445	6.10217	23435.6	30575534	2 (0 1 1 0 0)
reverse transcriptase [Human immunodeficiency virus 1]	0.00245277	10.056	64420.1	49574290	1 (1 0 0 0 0)
hCG2003033 [Homo sapiens]	0.002482	10.0945	20551.5	119624631	2 (1 0 1 0 0)
hypothetical protein LOC728621 [Homo sapiens]	0.00250343	10.0596	91277.5	124249396	2 (0 0 1 1 0)
envelope glycoprotein [Human immunodeficiency virus type 1]	0.00251761	8.05308	9414.93	4580082	1 (0 1 0 0 0)
pol protein [Human immunodeficiency virus 1]	0.00252475	8.08499	49574.5	38146393	1 (0 1 0 0 0)
hypothetical protein [Homo sapiens]	0.00260024	18.0878	180386	6807915	3 (1 0 1 0 1)
VP1 [Human enterovirus B]	0.0026122	10.1349	13554.5	113196500	2 (2 0 0 0 0)
WMBEHQ UL5 protein - human herpesvirus 2 (strain HG52) (fragment)	0.00263747	12.1438	88093.8	74001	6 (0 3 0 2 1)
A Chain A, Crystal Structure Of Human Cyclin B1	0.00265503	14.0733	30782.1	118137317	2 (0 1 1 0 0)
PREDICTED: hypothetical protein [Homo sapiens]	0.00266426	8.10071	18499.7	113426942	6 (0 3 1 1 1)
actinin, alpha 4, isoform CRA_a [Homo sapiens] [MA	0.00270433	10.0637	104790	119577213	1 (1 0 0 0 0)
heat shock 27kDa protein 1 [Homo sapiens]	0.00271762	20.1206	22768.5	4504517	2 (2 0 0 0 0)
hCG22803, isoform CRA_e [Homo sapiens]	0.00273559	14.0863	499228	119590144	2 (0 1 1 0 0)
LAMA2_HUMAN Laminin subunit alpha-2 precursor (Laminin M chain) (Merosin heavy	0.002738	22.0679	342549	2506805	3 (1 1 0 1 0)
G antigen, family C, 1 [Homo sapiens]	0.00274064	10.0631	11146.3	5901986	1 (1 0 0 0 0)
env protein [Human immunodeficiency virus type 2] [M	0.00277379	28.088	102046	8927266	4 (2 1 1 0 0)
OTTHUMP00000030388 [Homo sapiens]	0.0027919	20.0715	9868.81	66347296	2 (2 0 0 0 0)
unnamed protein product [Homo sapiens]	0.00280541	10.0641	51975.2	7020033	1 (1 0 0 0 0)
hCG2019063 [Homo sapiens]	0.0028055	10.0458	12087.7	119596532	1 (1 0 0 0 0)
spastic paraplegia 20, spartin (Troyer syndrome) homolog (human), isofo	0.00280684	10.0818	65635.4	149064756	1 (1 0 0 0 0)
armadillo repeat containing, X-linked 1 [Homo sapiens]	0.00282057	8.10685	49149.7	7706143	3 (0 1 1 0 1)
hCG1815862 [Homo sapiens]	0.0028424	10.0582	8010.21	119582388	1 (1 0 0 0 0)
unnamed protein product [Homo sapiens]	0.00286047	12.064	59606.7	10435023	2 (0 1 0 1 0)
vacuolar protein sorting 29 isoform 1 [Homo sapiens]	0.0028652	6.12811	20492.7	7706441	2 (0 1 1 0 0)
regulatory protein ICP22 [Human herpesvirus 1]	0.00287878	12.0918	46495.8	9629442	2 (1 0 0 0 1)
hypothetical protein DDBDRAFT_0167554 [Dictyostelium discoideum AX4]	0.00290598	2.07963	97953.4	66821673	2 (1 0 0 0 1)
neuronal PAS domain protein 1 [Homo sapiens]	0.0029143	8.07247	62662.6	22027482	1 (0 1 0 0 0)
calcium/calmodulin-dependent protein kinase IIB isoform 8 [Homo sapien	0.00294126	28.1114	50923	26051218	4 (1 2 0 0 1)
envelope glycoprotein [Human immunodeficiency virus 1]	0.00295894	14.1064	29315.7	38046894	3 (2 0 0 1 0)
unnamed protein product [Homo sapiens]	0.00297428	10.1005	21628.2	28207945	1 (1 0 0 0 0)
PREDICTED: hypothetical protein [Homo sapiens]	0.00297701	10.0529	14254.7	113414678	1 (1 0 0 0 0)
AF457067_8 envelope glycoprotein [Human immunodeficiency virus 1]	0.00302571	10.099	97734.3	22596375	1 (1 0 0 0 0)
suppressor of variegation 4-20 homolog 1 isoform 1 [Homo sapiens]	0.00304641	24.0692	99126.3	50659082	3 (2 0 0 1 0)
Mam1 [Homo sapiens]	0.00307645	8.08599	94269.2	6979930	1 (0 1 0 0 0)
polyprotein [Human coxsackievirus A2]	0.00312262	8.0742	16342.8	38347771	1 (0 1 0 0 0)
type IV collagen alpha 5 chain [Homo sapiens]	0.00312756	10.0482	1683.9	7717227	1 (1 0 0 0 0)
AF409343_1 envelope glycoprotein [Human immunodeficiency virus type 1]	0.00314637	8.09965	11310	15637887	2 (0 0 1 0 1)
PREDICTED: similar to poly(A) binding protein interacting protein 1 is	0.00315502	16.0622	54548.8	89041275	4 (0 4 0 0 0)
unnamed protein product [Homo sapiens]	0.00315661	8.04769	67703.4	22760046	1 (0 1 0 0 0)
multidomain protein with a conserved eukaryotic domain also present in	0.00316579	34.0726	435855	66362318	9 (1 1 1 2 4)
KIAA1433 protein [Homo sapiens]	0.0031822	8.08839	71541.6	7243247	1 (0 1 0 0 0)
immunoglobulin alpha heavy chain variable region [Homo sapiens]	0.00319143	8.09269	14011.9	62871218	5 (1 3 1 0 0)
EBNA-2 co-activator variant [Homo sapiens]	0.00320807	2.0933	107366	62088600	2 (0 1 0 0 1)
PREDICTED: similar to human immunodeficiency virus type I enhancer	0.00322388	24.0773	176510	109091454	4 (1 1 1 0 1)
novel protein [Homo sapiens]	0.00322769	10.0934	10345.1	55957548	1 (1 0 0 0 0)
S31503 H+/K+-exchanging ATPase (EC 3.6.3.10) ATP1AL1 - human (fragment)	0.00324629	8.1272	10485.2	346261	1 (0 1 0 0 0)
alpha/beta hydrolase domain containing protein 1 [Homo sapiens]	0.00325469	8.08414	45178.4	23397655	1 (0 1 0 0 0)
putative [Homo sapiens]	0.00327319	6.0585	2212.17	553734	5 (3 1 1 0 0)
DREB_HUMAN Drebrin (Developmentally-regulated brain protein)	0.00327566	18.1655	71381.6	2498313	9 (2 5 0 1 1)
coiled-coil domain containing 25 [Homo sapiens]	0.00333433	8.11221	24463.1	108936950	3 (0 3 0 0 0)
suppressor of cytokine signaling 1 [Homo sapiens]	0.00336584	8.06017	23536.1	4507233	1 (0 1 0 0 0)
unnamed protein product [Homo sapiens]	0.00340026	8.04393	81211.6	10438135	1 (0 1 0 0 0)
GNAS complex locus isoform f [Homo sapiens]	0.00340072	10.1013	45723	117938762	1 (1 0 0 0 0)
PREDICTED: proline rich Gla (G-carboxyglutamic acid) 1 isoform 1 [Mus	0.0034026	8.084	25044.6	63746591	4 (0 2 0 1 1)
brain acyl-CoA hydrolase [Homo sapiens]	0.00341744	20.0639	37396	2780414	2 (2 0 0 0 0)
NTPase, KAP family P-loop domain containing 1 [Homo sapiens]	0.00342487	8.03418	67737.2	115647960	1 (0 1 0 0 0)
anti-Rh(D) antibody immunoglobulin heavy chain variable region [Homo sap	0.00343601	10.0555	14550.9	93007543	1 (1 0 0 0 0)
HOXC8 [Homo sapiens]	0.00345461	8.09297	5918.24	2246418	1 (0 1 0 0 0)
hCG1653692 [Homo sapiens]	0.00351113	14.0666	14371.5	119579302	2 (1 0 0 1 0)
coiled-coil domain containing 120 [Homo sapiens]	0.00353587	10.0653	67526	15826862	2 (0 0 1 1 0)
N-ethylmaleimide-sensitive factor [Homo sapiens] [M	0.00353895	10.0737	82542.2	21040484	1 (1 0 0 0 0)
nef protein [Human immunodeficiency virus 1]	0.00355145	12.0659	23536	94540236	2 (0 1 0 1 0)
cullin 3 isoform [Homo sapiens]	0.00357371	10.0548	86151.1	33286088	1 (1 0 0 0 0)
PREDICTED: hypothetical protein [Homo sapiens]	0.00361049	8.09712	30995.8	89060010	1 (0 1 0 0 0)
aminoadipate-semialdehyde synthase [Homo sapiens]	0.00362298	16.0735	102067	13027640	2 (1 0 1 0 0)
MAP kinase-interacting serine/threonine kinase 2 isoform 2 [Homo sapie	0.00362613	10.0509	51841.9	40018627	1 (1 0 0 0 0)
zinc finger protein 764 [Homo sapiens]	0.00363167	14.1385	44942	15529976	5 (1 0 0 2 2)
protease [Human immunodeficiency virus 1]	0.00364735	10.0755	10781.9	25989296	1 (1 0 0 0 0)
unnamed protein product [Homo sapiens]	0.00364965	16.0464	54618.2	10439883	2 (1 0 1 0 0)
gag protein [Human immunodeficiency virus 1]	0.00366062	8.08507	16083.3	61655041	1 (0 1 0 0 0)
PA24D_HUMAN Cytosolic phospholipase A2 delta (cPLA2-delta) (Phospholipase A2	0.00366062	6.07806	91898.5	74750540	6 (0 0 0 4 2)
apolipoprotein L1 isoform b precursor [Homo sapiens]	0.00369581	10.0608	45889.9	21735616	1 (1 0 0 0 0)
pol polyprotein [Human immunodeficiency virus type 1]	0.00370374	10.1031	45037.2	13736054	2 (1 0 1 0 0)
pol protein [Human immunodeficiency virus 1]	0.00374114	10.0637	57262.6	116276595	1 (1 0 0 0 0)
LOC647217 protein [Homo sapiens]	0.00374436	8.08731	26065.5	60551206	1 (0 1 0 0 0)
FLJ00067 protein [Homo sapiens]	0.00375444	12.1095	63294.7	10440462	2 (0 1 0 1 0)
OTTHUMP00000028514 [Homo sapiens]	0.00375956	16.0749	83802	57208207	2 (1 0 1 0 0)
KIAA2022 protein [Homo sapiens]	0.00376404	12.0817	167933	24899208	2 (0 1 0 1 0)
AF151754_1 envelope glycoprotein [Human immunodeficiency virus type 1] [MA	0.00376888	18.094	13259.7	5524567	2 (1 1 0 0 0)
PREDICTED: hypothetical protein [Homo sapiens]	0.00383375	10.074	55280.5	113428345	1 (1 0 0 0 0)
natural cytotoxicity triggering receptor 3 [Homo sapiens]	0.00385384	18.073	21579.3	24475832	3 (1 1 0 0 1)
Kruppel-like factor 10 isoform b [Homo sapiens]	0.00385948	10.0485	51390.8	73760403	1 (1 0 0 0 0)
envelope glycoprotein [Human immunodeficiency virus 1]	0.00385965	24.0979	31845	99029604	7 (1 3 1 1 1)
TM16D_HUMAN Transmembrane protein 16D	0.00386109	14.0882	111390	121942141	3 (0 0 1 2 0)
galectin-3-binding protein-like [Homo sapiens]	0.00388615	14.0506	52438.4	122937327	2 (0 1 1 0 0)
pol protein [Human immunodeficiency virus 1]	0.00392014	10.0638	61439.7	149127148	1 (1 0 0 0 0)
MTMR15 protein [Homo sapiens]	0.00396524	8.06463	59529.3	28839601	1 (0 1 0 0 0)
unnamed protein product [Homo sapiens]	0.00397604	18.0666	54421.5	21749671	2 (1 1 0 0 0)
NKX28_HUMAN Homeobox protein Nkx-2.8 (Homeobox protein NK-2 homolog H)	0.00398946	8.14153	25792.3	6016208	1 (0 1 0 0 0)
gag polyprotein [Human immunodeficiency virus type 1]	0.0040218	10.0683	51729.4	912558	3 (0 1 1 0 1)
PREDICTED: similar to Integrin alpha-3 precursor (Galactoprotein B3) (	0.00403433	8.07353	12877.6	89037344	1 (0 1 0 0 0)
S34775 nicotinic acetylcholine receptor epsilon chain precursor - human	0.00403549	8.11022	54581.4	479584	2 (0 2 0 0 0)
AMACO [Homo sapiens]	0.00404996	10.0635	81988.1	27657363	1 (1 0 0 0 0)
immunoglobulin heavy chain variable region [Homo sapiens]	0.00407781	8.12779	9200.49	10636560	1 (0 1 0 0 0)
NUP98-HOXD13 fusion protein [Homo sapiens]	0.00409703	10.0816	57646.1	9796392	1 (1 0 0 0 0)
KIAA1363 protein [Homo sapiens]	0.00409902	18.0859	48042	7243107	4 (0 1 2 1 0)
PREDICTED: similar to Prostate, ovary, testis expressed protein on	0.00412012	4.09013	121367	113413194	2 (0 0 0 0 2)
chaperonin [Homo sapiens]	0.00413803	38.0707	61016.5	31542947	5 (3 0 1 0 1)
hCG2040497 [Homo sapiens]	0.00414132	6.06612	64675.2	119569662	2 (0 0 0 1 1)
Unknown [Homo sapiens]	0.00414829	18.0746	32734.2	4406663	2 (1 1 0 0 0)
KIAA0315 [Homo sapiens]	0.00418512	8.09152	205280	2280476	1 (0 1 0 0 0)
KIAA0664 protein [Homo sapiens]	0.00420157	10.0674	127336	3327142	1 (1 0 0 0 0)
low density lipoprotein receptor (familial hypercholesterolemia), isofo	0.00420577	10.1412	12662.6	119604574	1 (1 0 0 0 0)
hCG2019335 [Homo sapiens]	0.00421688	10.0632	16026.3	119596782	2 (1 1 0 0 0)
C Chain C, Semi-Extended Solution Structure Of Human Myeloma Immunoglobulin D	0.00421748	10.0968	56189.2	82407640	2 (1 1 0 0 0)
unnamed protein product [Homo sapiens]	0.00421787	24.0676	26012.3	34532136	3 (1 1 1 0 0)
KIAA1582 protein [Homo sapiens]	0.00422847	2.07434	181152	20521948	2 (1 0 0 0 1)
Carbonic anhydrase III, muscle specific [Homo sapiens]	0.00425696	8.06618	29552.7	13436164	2 (1 1 0 0 0)
unnamed protein product [Homo sapiens]	0.00425829	16.069	40517.3	7023838	2 (0 2 0 0 0)
AF512538_3 fusion glycoprotein [Human respiratory syncytial virus]	0.00428205	10.0784	63319	21263086	2 (1 1 0 0 0)
tektin 4 [Homo sapiens]	0.0042871	10.0985	50617.3	21389613	5 (1 1 1 2 0)
unnamed protein product [Homo sapiens]	0.00430801	18.1652	55559.6	10438086	4 (3 1 0 0 0)
unnamed protein product [Homo sapiens]	0.00431572	26.0845	69355.8	31283	5 (1 3 1 0 0)
choline dehydrogenase [Homo sapiens]	0.00432087	12.0674	65360.3	27501456	2 (1 0 0 0 1)
annexin VII isoform 1 [Homo sapiens]	0.00433606	20.0642	50283.7	4502111	5 (1 1 1 1 1)
envelope glycoprotein gp120 [Human immunodeficiency virus 1]	0.0043392	8.07932	21984.1	11124859	1 (0 1 0 0 0)
hypothetical protein LOC154791 [Homo sapiens]	0.00435894	10.048	12724.7	37537548	1 (1 0 0 0 0)
capsid protein precursor [Human astrovirus 3] [MAS	0.00441675	6.06673	86862.5	146199231	3 (0 1 2 0 0)
SYNE1_HUMAN Nesprin-1 (Nuclear envelope spectrin repeat protein 1) (Synaptic	0.00443067	52.117	1010433	29839561	7 (2 2 2 1 0)
transcriptional regulator ICP4 [Human herpesvirus 3]	0.00443213	8.0601	139912	9625936	1 (0 1 0 0 0)
Wiskott-Aldrich syndrome protein family member 1 [Homo sapiens]	0.00448807	14.0881	61614.2	4507913	4 (1 1 0 2 0)
phosphorylase kinase, alpha 1 (muscle) [Homo sapiens]	0.00450412	16.0815	137251	4505779	2 (0 2 0 0 0)
envelope glycoprotein [Human immunodeficiency virus type 1]	0.00456234	8.0698	14375.4	7248181	1 (0 1 0 0 0)
ATP synthase mitochondrial F1 complex assembly factor 2 [Homo sapiens]	0.00461149	16.087	32751.9	21735485	2 (0 2 0 0 0)
VP1 [Human coxsackievirus A7]	0.00462549	12.0708	32516	73671581	2 (1 0 0 0 1)
unnamed protein product [Homo sapiens]	0.00469275	18.059	54837	10435504	2 (1 1 0 0 0)
GCYB2_HUMAN Guanylate cyclase soluble subunit beta-2 (GCS-beta-2)	0.00471506	22.0894	70322.3	14916977	4 (2 0 1 0 1)
SCN5A_HUMAN Sodium channel protein type 5 subunit alpha (Sodium channel protei	0.00471599	16.0681	227013	4033376	2 (1 0 1 0 0)
polyprotein [Human enterovirus B]	0.00474729	10.0512	244292	33111999	1 (1 0 0 0 0)
envelope glycoprotein [Human immunodeficiency virus 1]	0.00475219	16.0643	13707.9	28916298	2 (1 0 1 0 0)
forkhead box F1 [Homo sapiens]	0.00475412	10.0488	40096.3	110735445	1 (1 0 0 0 0)
B46091 H+-exporting ATPase (EC 3.6.3.6) chain A, vacuolar (VA68 type) - human	0.00477611	46.1138	68204.5	1082432	5 (4 0 1 0 0)
AF278765_1 kappa B and V(D)J recombination signal sequences binding prote	0.00478671	6.09706	259222	12658305	3 (0 2 1 0 0)
unnamed protein product [Homo sapiens]	0.00481494	10.06	41846.9	10435327	2 (0 0 1 1 0)
unnamed protein product [Homo sapiens]	0.00484437	14.0925	53757.1	16554263	2 (0 1 1 0 0)
vif protein [Human immunodeficiency virus type 1] [	0.00484828	10.0533	22526.8	11177196	1 (1 0 0 0 0)
inosine monophosphate dehydrogenase 1 isoform b [Homo sapiens]	0.00488561	6.07814	60399	34328928	2 (0 0 0 1 1)
carbonic anhydrase X [Homo sapiens]	0.00491279	16.0655	37538.9	9910366	2 (1 0 1 0 0)
serpin peptidase inhibitor, clade I (pancpin), member 2 [Homo sapiens]	0.0049582	10.1104	46115.6	5453886	1 (1 0 0 0 0)
tripartite motif-containing 42 [Homo sapiens]	0.0049658	10.0812	82717.9	28195390	1 (1 0 0 0 0)
anti-tetanus toxoid immunoglobulin heavy chain variable region [Homo sap	0.00496816	8.06849	13222.5	58221905	3 (0 1 0 0 2)
protein-L-isoaspartate (D-aspartate) O-methyltransferase, isoform CRA_b	0.005073	8.05423	7407.68	119568172	1 (0 1 0 0 0)
DLEC1_HUMAN Deleted in lung and esophageal cancer protein 1 (Deleted in lung	0.00513629	14.0734	195658	74721310	2 (0 1 1 0 0)
integrase [Human immunodeficiency virus 1]	0.00518455	8.08404	12675.6	74039880	1 (0 1 0 0 0)
envelope glycoprotein [Human immunodeficiency virus 1]	0.00519197	8.03644	95574.1	38491818	1 (0 1 0 0 0)
hypothetical protein LOC133686 isoform 2 [Homo sapiens]	0.00522218	10.0638	31696.1	23308515	1 (1 0 0 0 0)
ligand-gated ion-channel receptor L2 [Homo sapiens]	0.00526162	8.06764	45656.2	73611156	1 (0 1 0 0 0)
gag protein [Human immunodeficiency virus 1]	0.0052769	10.0962	14737.6	623912	1 (1 0 0 0 0)
envelope glycoprotein [Human immunodeficiency virus 1]	0.00529262	8.09057	12560.8	87246677	1 (0 1 0 0 0)
unnamed protein product [Homo sapiens]	0.00529266	16.0547	52992.1	34526448	3 (1 0 0 1 1)
RALBP1 associated Eps domain containing 2 isoform 1 [Homo sapiens]	0.00530987	12.059	71489.3	125625326	2 (0 0 2 0 0)
heavy neurofilament subunit [Homo sapiens]	0.00537001	10.0687	111713	1841430	1 (1 0 0 0 0)
vif protein [Human immunodeficiency virus 1]	0.00538731	10.0506	22716.8	70905423	1 (1 0 0 0 0)
novel protein similar to human chromodomain helicase DNA binding protei	0.00539604	28.0677	194514	94733808	4 (0 3 0 1 0)
unnamed protein product [Homo sapiens]	0.00542705	12.0778	113038	34532374	3 (0 0 0 3 0)
chromosome 20 open reading frame 116 [Homo sapiens]	0.00542777	8.03878	33918.6	24474867	1 (0 1 0 0 0)
gp120 [Human immunodeficiency virus type 1]	0.00545287	10.0562	22930.4	404951	1 (1 0 0 0 0)
hypothetical protein PBCV1_A193L [Paramecium bursaria Chlorella virus 1	0.00545753	16.0783	29607.8	9631761	2 (1 0 1 0 0)
spectrin repeat containing, nuclear envelope 2, isoform CRA_b [Homo sap	0.00548128	10.0918	146400	119601245	1 (1 0 0 0 0)
immediate early 1 [Human herpesvirus 6]	0.00549184	22.1182	121270	19773436	4 (0 2 0 1 1)
antithrombin III variant [Homo sapiens]	0.00552345	22.0565	52658	576554	3 (0 2 1 0 0)
unnamed protein product [Homo sapiens]	0.00553185	10.0607	27676.1	21749391	1 (1 0 0 0 0)
E1 protein [Human papillomavirus type 77]	0.00556783	10.1253	74292.4	2911561	1 (1 0 0 0 0)
Y104_ADE07 Hypothetical 10.4 kDa early protein	0.00559345	8.08492	10451.3	139904	1 (0 1 0 0 0)
dJ85M6.1 (cleavage stimulation factor, 3' pre-RNA, subunit 3, 77kD) [Ho	0.00560646	12.1222	81992.6	15131402	2 (1 0 0 0 1)
unnamed protein product [Homo sapiens]	0.00562496	28.0811	125143	34536041	4 (2 0 1 0 1)
SPTA1_HUMAN Spectrin alpha chain, erythrocyte (Erythroid alpha-spectrin)	0.00574152	30.0743	279742	1174412	4 (2 0 1 1 0)
dehydrogenase/reductase (SDR family) X-linked [Homo sapiens]	0.00574942	8.06195	36453.1	21553325	2 (0 0 1 0 1)
phosphodiesterase 7B [Homo sapiens]	0.00575746	16.049	22884.8	66347388	2 (1 0 1 0 0)
envelope glycoprotein [Human immunodeficiency virus type 1]	0.00577775	10.0391	16931.6	19073557	1 (1 0 0 0 0)
unnamed protein product [Homo sapiens]	0.00579327	14.076	70979.4	10435364	4 (0 1 0 1 2)
pol protein [Human immunodeficiency virus 1]	0.00582091	10.0803	57234.9	116277025	1 (1 0 0 0 0)
pol protein [Human immunodeficiency virus type 1] [M	0.00582091	8.08026	37355.9	9945449	1 (0 1 0 0 0)
hypothetical protein LOC257169 [Homo sapiens]	0.00585688	14.0642	52188.7	22749539	2 (1 0 0 1 0)
hCG2039932 [Homo sapiens]	0.00586956	8.05343	6613.29	119580551	1 (0 1 0 0 0)
TBB4Q_HUMAN Tubulin beta-4q chain	0.00587111	10.1168	48403.5	12643363	4 (2 1 0 1 0)
transmembrane protein 26 [Homo sapiens]	0.0058754	16.0721	41645.1	50233826	3 (1 0 1 0 1)
hCG1789217 [Homo sapiens]	0.00587788	10.0472	11022	119620364	1 (1 0 0 0 0)
WAP four-disulfide core domain 11 precursor [Homo sapiens]	0.00592537	18.0923	10333	22218355	2 (1 1 0 0 0)
interleukin 12 receptor, beta 2 precursor [Homo sapiens]	0.00595915	22.0963	97073.1	4504643	3 (2 0 0 0 1)
WD repeat-containing protein 1 isoform 1 [Homo sapiens]	0.00598136	10.0573	66151.9	9257257	1 (1 0 0 0 0)
unnamed protein product [Homo sapiens]	0.00600488	12.0838	19790.2	21757759	2 (0 1 0 1 0)
hCG21198, isoform CRA_b [Homo sapiens]	0.00604169	10.0629	16564.4	119618928	1 (1 0 0 0 0)
VS10_ROTH2 Non-structural glycoprotein NCVP5 (NS28)	0.00606308	8.04726	20340.7	267402	1 (0 1 0 0 0)
MHC class II antigen [Homo sapiens]	0.00612387	10.0632	27528.1	61658250	1 (1 0 0 0 0)
SEP10_HUMAN Septin-10	0.0061313	20.0786	59943.4	68053324	5 (0 1 1 2 1)
hCG2040825 [Homo sapiens]	0.00618763	8.04225	8482.34	119568088	1 (0 1 0 0 0)
nef protein [Human immunodeficiency virus 1]	0.00622419	8.11338	23621.6	94538886	1 (0 1 0 0 0)
sorting nexin 19 [Homo sapiens]	0.00628327	10.0644	108594	7662026	2 (0 0 1 1 0)
envelope glycoprotein [Human immunodeficiency virus 1]	0.00633593	10.0338	98607.1	94959096	1 (1 0 0 0 0)
HIV-1 Rev-binding protein-like protein [Homo sapiens]	0.0063408	14.0721	48932.4	91984781	2 (0 1 1 0 0)
hypothetical protein [Homo sapiens]	0.00634365	10.0698	174936	50949447	2 (2 0 0 0 0)
ring finger and CCCH-type zinc finger domains 2 [Homo sapiens]	0.00636071	16.0946	96287.6	9256537	2 (1 0 1 0 0)
unnamed protein product [Homo sapiens]	0.0063635	10.0677	25484.4	34535279	1 (1 0 0 0 0)
Matrix metallopeptidase 11 (stromelysin 3) [Homo sapiens]	0.00636842	10.0912	54495.7	35505497	1 (1 0 0 0 0)
PREDICTED: similar to likely orthologue of Homo sapiens tubulin be	0.00638344	8.14791	50305.6	126303146	6 (2 3 0 0 1)
KIAA0325 protein [Homo sapiens]	0.00642714	48.0928	533404	71891782	11 (1 1 2 5 2)
HIG1 domain family, member 2A [Homo sapiens]	0.00644268	10.0997	11521.1	20270389	2 (1 1 0 0 0)
immunoglobulin heavy chain variable region [Homo sapiens]	0.00646275	8.05115	12669.6	15777455	1 (0 1 0 0 0)
envelope glycoprotein [Human immunodeficiency virus 1]	0.00646857	10.0818	95889.2	66864708	1 (1 0 0 0 0)
pol protein [Human immunodeficiency virus 1]	0.00647846	6.14616	38590.4	148924015	4 (0 2 1 1 0)
hCG2045507 [Homo sapiens]	0.00649341	8.07495	13967.3	119609421	1 (0 1 0 0 0)
A Chain A, Structure Of Human Malic Enzyme In Complex With Ketomalonate	0.00660351	10.0865	65132.6	7245390	1 (1 0 0 0 0)
AMPK-related protein kinase 5 [Homo sapiens]	0.00660395	18.0981	74258.8	7662170	2 (1 1 0 0 0)
envelope glycoprotein [Human immunodeficiency virus type 1]	0.00661461	8.07736	28328.3	1845877	1 (0 1 0 0 0)
envelope glycoprotein [Human immunodeficiency virus 1]	0.00664534	8.10133	22577.4	46253090	2 (0 2 0 0 0)
ADT3_HUMAN ADP/ATP translocase 3 (Adenine nucleotide translocator 2) (ANT 3) (A	0.0067303	10.1214	32845.2	113463	1 (1 0 0 0 0)
protease [Human immunodeficiency virus 1]	0.00675757	8.07788	10792.4	55703378	1 (0 1 0 0 0)
unnamed protein product [Homo sapiens]	0.00678018	20.0836	31543.7	28207903	2 (2 0 0 0 0)
immunoglobulin heavy chain variable region [Homo sapiens]	0.00682183	10.0676	13060.4	10636534	2 (0 0 1 1 0)
hCG2038636 [Homo sapiens]	0.0068557	10.0778	9701.85	119626852	2 (1 0 0 1 0)
envelope glycoprotein [Human immunodeficiency virus 1]	0.00686932	10.0728	19613.9	125395525	1 (1 0 0 0 0)
gag protein [Human immunodeficiency virus 1]	0.00692981	14.093	16395.2	124745351	2 (1 0 0 1 0)
interleukin 1 receptor accessory protein-like 1 [Homo sapiens]	0.00693727	12.0738	79917.6	7657232	2 (0 1 0 1 0)
A Chain A, Crystal Structure Of Human Dehydroepiandrosterone Sulfotransferase	0.00694484	18.0678	34651.5	21465697	2 (1 1 0 0 0)
hCG2040835 [Homo sapiens]	0.00697439	14.0696	8229.78	119580475	3 (0 1 0 1 1)
reticulon 4 receptor-like 2 [Homo sapiens]	0.00702079	10.0463	46076.6	30425563	1 (1 0 0 0 0)
UL27 [Human herpesvirus 5 strain AD169]	0.00703686	8.05731	69176.9	9625712	1 (0 1 0 0 0)
pol protein [Human immunodeficiency virus 1]	0.00703801	10.0766	57041.4	125633984	1 (1 0 0 0 0)
SLC1A3 protein [Homo sapiens]	0.00703993	10.0688	7415.98	32450689	1 (1 0 0 0 0)
envelope glycoprotein [Human immunodeficiency virus 1]	0.00706095	6.09274	96698.8	26518644	2 (0 0 0 1 1)
solute carrier family 22 member 2 [Homo sapiens]	0.00709893	20.0596	62523.6	4507001	4 (3 1 0 0 0)
Amyloid beta (A4) precursor protein-binding, family B, member 3 [Homo sa	0.00710858	6.04991	52570.2	15341938	2 (0 0 0 1 1)
hypothetical protein LOC389151 [Homo sapiens]	0.00712893	12.0537	28251.4	61966747	2 (0 1 0 1 0)
protein phosphatase 1 glycogen-binding regulatory subunit 3 [Homo sapie	0.0071437	10.082	125759	4506011	1 (1 0 0 0 0)
cyclin-dependent kinase-like 5 [Homo sapiens]	0.00715439	10.0584	115466	4507281	1 (1 0 0 0 0)
insulin receptor substrate 4 [Homo sapiens]	0.0071778	30.0994	133685	4504733	8 (1 1 3 1 2)
hypothetical protein CX157 [Homo sapiens]	0.00721677	8.09128	13360.8	14585847	2 (0 1 1 0 0)
AF484486_4 tat protein [Human immunodeficiency virus 1]	0.00722829	12.0643	9766.75	25166714	2 (1 0 0 0 1)
soluble liver antigen/liver pancreas antigen (Homo sapiens), like [Dan	0.00727886	14.0999	53695.8	41055875	2 (1 0 0 1 0)
unnamed protein product [Homo sapiens]	0.00729827	8.10534	96783.1	34536006	2 (0 0 1 0 1)
KIAA0478 protein [Homo sapiens]	0.00732392	24.105	139572	20521063	4 (0 4 0 0 0)
T09193 ataxin 7 - human	0.00733016	8.05476	95343	7512294	1 (0 1 0 0 0)
PREDICTED: similar to O-acyltransferase (membrane bound) domain co	0.00736492	10.0534	90762.5	113413682	1 (1 0 0 0 0)
GOLPH2 [Homo sapiens]	0.0074015	8.09305	45202.8	48146519	1 (0 1 0 0 0)
envelope glycoprotein [Human immunodeficiency virus 1]	0.00740499	8.07161	13419.1	56126162	2 (0 0 1 0 1)
mitogen-activated protein kinase 10 isoform 2 [Homo sapiens]	0.00743615	10.0643	52551.5	20986510	1 (1 0 0 0 0)
unnamed protein product [Homo sapiens]	0.00747924	12.0497	81745.5	21751193	2 (1 0 0 0 1)
ATP-binding cassette, sub-family C (CFTR/MRP), member 2 [Homo sapiens]	0.00752294	18.0535	174080	4557481	3 (0 1 1 1 0)
X95263 Periodic tryptophan protein 2 g	0.00755595	10.0527	99495	5103844	1 (1 0 0 0 0)
BNRF1 [Human herpesvirus 4 type 1]	0.0076356	8.04943	142753	82503191	1 (0 1 0 0 0)
unnamed protein product [Homo sapiens]	0.00764467	8.07179	23100.5	21757810	1 (0 1 0 0 0)
S73539_1 Unknown [Homo sapiens]	0.00765831	10.1146	2923.54	4261831	4 (0 0 1 3 0)
GLIS family zinc finger 3 transcript variant long T1 [Homo sapiens] [MAS	0.00766296	10.1102	101587	91978923	6 (6 0 0 0 0)
sine oculis homeobox homolog 6 [Homo sapiens]	0.00767363	14.1078	27647.3	6677979	6 (1 3 2 0 0)
phosphodiesterase 10A [Homo sapiens]	0.00772734	18.0588	88355.7	5729972	2 (1 1 0 0 0)
pol protein [Human immunodeficiency virus type 1] [M	0.00772757	14.0594	37319.9	9934472	2 (1 0 0 1 0)
reverse transcriptase [Human immunodeficiency virus 1]	0.00772757	8.05944	24796.4	19571397	1 (0 1 0 0 0)
hypothetical protein LOC145483 [Homo sapiens]	0.00773313	20.0498	73648.1	22748943	3 (1 1 0 0 1)
LINCR protein [Homo sapiens]	0.00774975	10.0639	14298.8	15147367	1 (1 0 0 0 0)
sialoadhesin precursor [Homo sapiens]	0.00776432	20.0692	182509	13489095	3 (0 1 2 0 0)
monoclonal antibody RL1 immunoglobulin heavy chain variable region [Homo	0.00778216	10.054	11921.8	2995671	1 (1 0 0 0 0)
envelope glycoprotein [Human immunodeficiency virus type 1]	0.00778426	10.0315	23723.8	5758269	1 (1 0 0 0 0)
U32204_1 Ig heavy chain [Homo sapiens]	0.0077991	10.0942	4599.1	11526613	2 (2 0 0 0 0)
olfactory receptor [Homo sapiens]	0.00780951	10.1169	35256.6	12054471	2 (1 0 0 1 0)
envelope glycoprotein [Human immunodeficiency virus 1]	0.00781239	8.07134	26472.2	2251041	1 (0 1 0 0 0)
5-oxo-L-prolinase [Homo sapiens]	0.00783688	4.05976	19331	2555157	2 (1 0 0 1 0)
unnamed protein product [Homo sapiens]	0.00786168	10.09	91947.4	10434798	1 (1 0 0 0 0)
gag protein [Human immunodeficiency virus 1]	0.00786779	8.1057	55846.5	110750452	3 (0 1 1 0 1)
unnamed protein product [Homo sapiens]	0.00789157	20.1165	58104.4	7021924	4 (1 2 0 0 1)
membrane protein, palmitoylated 4 [Homo sapiens]	0.00797439	10.0574	72762.4	14780902	1 (1 0 0 0 0)
integrase [Human immunodeficiency virus type 1] [MA	0.00799537	8.0599	32109.6	15553674	1 (0 1 0 0 0)
SR protein kinase (SRPK) involved in regulating proteins involved in mR	0.00801378	10.0786	83185.8	6323872	1 (1 0 0 0 0)
unknown [Homo sapiens]	0.00801384	8.03737	25526.3	62822226	1 (0 1 0 0 0)
unnamed protein product [Homo sapiens]	0.00806636	12.0953	50797.3	34530832	3 (1 1 0 1 0)
histone cluster 1, H1a [Homo sapiens]	0.00806707	10.0864	21828.9	4885373	2 (2 0 0 0 0)
KIAA0774 protein [Homo sapiens]	0.00815253	24.0649	151263	71891683	4 (1 1 0 1 1)
lipin 3 [Homo sapiens]	0.00816257	8.09815	93556.5	74271888	5 (0 4 0 0 1)
envelope glycoprotein [Human immunodeficiency virus 1]	0.00818019	16.1093	26957.8	58760491	4 (1 0 0 1 2)
envelope glycoprotein [Human immunodeficiency virus 1]	0.0082174	10.0775	13067.8	62869383	4 (2 0 1 0 1)
nucleosomal binding protein 1 [Homo sapiens]	0.00823968	14.081	31506	13540523	3 (0 2 1 0 0)
SMC6 protein [Homo sapiens]	0.00825559	24.0871	126246	13375848	5 (0 2 1 1 1)
AF310233_1 sialic acid binding immunoglobulin-like lectin 10 [Homo sapien	0.00831012	24.0673	76571.7	14164613	3 (1 1 1 0 0)
H1 histone family, member X [Homo sapiens]	0.00832162	22.1041	22473.5	5174449	3 (2 0 0 0 1)
small GTP-binding protein Rab36 [Homo sapiens]	0.00836317	18.0703	36300.4	4579755	2 (1 1 0 0 0)
pleckstrin homology-like domain, family B, member 1 [Homo sapiens]	0.00836512	10.1042	151068	38424073	2 (0 0 1 1 0)
neurogenic differentiation 6 [Homo sapiens]	0.00841604	26.0955	38680.3	27475985	8 (1 3 1 1 2)
WNK lysine deficient protein kinase 1 [Homo sapiens]	0.00844682	6.05351	7713.74	119024965	2 (0 1 1 0 0)
DPYL4_HUMAN Dihydropyrimidinase-related protein 4 (DRP-4) (Collapsin response	0.00845075	8.0887	61838.5	68067941	1 (0 1 0 0 0)
amino-terminal enhancer of split isoform a [Homo sapiens]	0.00847603	10.0637	29072.8	39812019	1 (1 0 0 0 0)
CN145_HUMAN Uncharacterized protein C14orf145	0.00849452	14.0842	73526.3	71153197	4 (0 1 2 0 1)
gag protein [Human immunodeficiency virus 1]	0.00849928	18.0882	52116.6	55416399	2 (1 1 0 0 0)
TFIIF (Transcription Factor II) largest subunit; involved in both trans	0.0085372	26.0903	82144.1	6321625	7 (1 5 0 0 1)
faciogenital dysplasia protein [Homo sapiens]	0.00855246	24.0647	106494	24797153	6 (0 2 2 1 1)
envelope glycoprotein [Human immunodeficiency virus 1]	0.00856583	8.05679	96402.7	86753489	2 (0 0 1 0 1)
Na,K-ATPase catalytic subunit alpha-A protein [Homo sapiens]	0.00856599	8.14494	3563.7	5919228	1 (0 1 0 0 0)
PREDICTED: neutrophil cytosolic factor 1 isoform 4 [Pan troglodyte	0.00857977	8.0861	44654.9	114614035	3 (0 2 1 0 0)
envelope glycoprotein [Human immunodeficiency virus 1]	0.00868647	10.0821	96672.3	74273428	2 (0 0 1 1 0)
hypothetical protein [Homo sapiens]	0.00869023	10.1125	31851.1	12224992	1 (1 0 0 0 0)
envelope glycoprotein [Human immunodeficiency virus 1]	0.00870932	10.0687	52843.2	90576681	2 (0 0 1 1 0)
transient receptor potential cation channel, subfamily M, member 4 [Ho	0.0087315	6.06887	134216	21314671	2 (0 0 0 1 1)
leucine carboxyl methyltransferase 2 [Homo sapiens]	0.0087327	10.0545	75554.3	25188199	2 (0 1 0 0 1)
hCG1744891, isoform CRA_b [Homo sapiens]	0.00882826	10.0674	44324.6	119600845	2 (0 1 0 0 1)
envelope glycoprotein [Human immunodeficiency virus type 1]	0.00883043	8.06318	18220.2	7208032	1 (0 1 0 0 0)
NMDE3_HUMAN Glutamate [NMDA] receptor subunit epsilon-3 precursor (N-methyl D-	0.00885564	14.0736	134155	2492629	2 (1 0 0 1 0)
GDP-mannose 4,6-dehydratase [Homo sapiens]	0.00886689	12.0676	41923.3	4504031	2 (0 0 2 0 0)
small T antigen [Human adenovirus type 4]	0.00894776	10.0641	16710.4	57115799	1 (1 0 0 0 0)
envelope glycoprotein [Human immunodeficiency virus type 1]	0.00895067	8.05694	13475	6693878	1 (0 1 0 0 0)
hCG2039868 [Homo sapiens]	0.00896788	20.1305	9082.43	119607473	4 (2 0 0 2 0)
PREDICTED: hypothetical protein [Homo sapiens]	0.00899025	10.0528	17793.8	113418910	1 (1 0 0 0 0)
hypothetical protein [Homo sapiens]	0.00900911	20.0938	72378.3	52545896	2 (2 0 0 0 0)
similar to GenBank Accession Number AF045184 nuclear receptor coactivato	0.00903574	18.1445	25758.4	29841015	8 (1 0 1 3 3)
unnamed protein product [Homo sapiens]	0.00905798	8.07786	16183.1	21751117	1 (0 1 0 0 0)
gag protein [Human immunodeficiency virus 1]	0.00909182	8.05827	8687.23	148361774	1 (0 1 0 0 0)
unnamed protein product [Homo sapiens]	0.00909311	10.0395	75543	21755884	1 (1 0 0 0 0)
tripartite motif-containing 35 isoform 2 [Homo sapiens]	0.00910084	18.1121	56503.9	94536782	2 (1 1 0 0 0)
KIAA0650 protein [Homo sapiens]	0.00916622	14.0785	95696	3327114	2 (1 0 0 1 0)
ATGTF2H2/GTF2H2 (GENERAL TRANSCRIPTION FACTOR IIH 2); general RNA poly	0.00917714	10.0846	46947.3	30679101	4 (1 2 0 0 1)
DUOX2_HUMAN Dual oxidase 2 precursor (NADPH oxidase/peroxidase DUOX2) (NADPH	0.00917719	26.0788	175251	74719101	4 (1 2 0 1 0)
vpu protein [Human immunodeficiency virus 1]	0.00929375	10.0778	10005.4	38892779	1 (1 0 0 0 0)
hCG1793351, isoform CRA_a [Homo sapiens]	0.00935495	14.0669	80077.1	119581768	2 (1 0 0 1 0)
ribonuclease H2, subunit B [Homo sapiens]	0.00937776	10.0536	35082.4	13375742	2 (0 1 0 0 1)
pol polyprotein [Human immunodeficiency virus 1] [M	0.00937841	8.07039	23785.5	45551254	1 (0 1 0 0 0)
hypothetical protein LOC283461 [Homo sapiens]	0.00940753	8.11596	74457.4	87299626	1 (0 1 0 0 0)
hCG1773636 [Homo sapiens]	0.00942197	4.13882	20494.8	119578198	3 (0 1 0 1 1)
regulator of G-protein signalling 4 [Homo sapiens]	0.00942577	8.07969	10549.3	55664919	1 (0 1 0 0 0)
Thy-1 cell surface antigen [Homo sapiens]	0.00946205	10.1172	17923.3	19923362	1 (1 0 0 0 0)
vacuolar protein sorting 37B [Homo sapiens]	0.0094644	8.10237	31287.5	13375926	2 (1 1 0 0 0)
keratin [Homo sapiens]	0.00947014	20.0606	51303.3	1200072	2 (2 0 0 0 0)
galanin preproprotein [Homo sapiens]	0.00948945	14.0859	13293.9	27804313	2 (0 1 1 0 0)
immunoglobulin mu heavy chain variable region [Homo sapiens]	0.00950454	10.1014	11396.7	15777471	1 (1 0 0 0 0)
p40 [Homo sapiens]	0.00953464	22.0748	40016.7	2072950	3 (1 1 0 1 0)
CN167_HUMAN Uncharacterized protein C14orf167	0.00955422	10.0926	7338.41	37537855	1 (1 0 0 0 0)
solute carrier family 25 member 3 isoform a precursor [Homo sapiens]	0.00961142	20.1352	40068.8	6031192	2 (2 0 0 0 0)
hCG2001613 [Homo sapiens]	0.00963377	10.0594	12929	119615098	2 (1 0 0 1 0)
envelope glycoprotein [Human immunodeficiency virus 1]	0.00963747	10.1287	12258.5	24079937	2 (2 0 0 0 0)
myosin heavy chain [Homo sapiens]	0.00964397	8.0522	285063	20338989	2 (0 0 1 0 1)
FLJ00149 protein [Homo sapiens]	0.00966122	8.07099	88246.2	18676504	2 (0 0 1 0 1)
protein phosphatase 1 (formerly 2C)-like [Homo sapiens]	0.00973922	6.06445	41027.1	63003905	2 (0 1 1 0 0)
AF166179_1 polyprotein [Human coxsackievirus A9] [MAS	0.00975802	8.15309	14925.1	6752481	3 (0 2 0 0 1)
AF166172_1 polyprotein [Human coxsackievirus A9] [MAS	0.00975802	6.14798	14943.1	6752467	4 (1 0 2 1 0)
envelope glycoprotein [Human immunodeficiency virus 1]	0.00976186	8.05205	19876.1	56783115	1 (0 1 0 0 0)
unnamed protein product [Homo sapiens]	0.00977059	10.0517	29443.4	10434365	2 (0 1 0 0 1)
polyprotein [Human rhinovirus 54]	0.0097953	6.07196	52313.3	46520177	2 (0 0 0 1 1)
pol protein [Human immunodeficiency virus 1]	0.00979704	8.06273	9622.15	46243202	1 (0 1 0 0 0)
PREDICTED: similar to RAN binding protein 2 isoform 2 [Homo sapien	0.0098263	8.04426	197795	113413176	1 (0 1 0 0 0)
dachsous 2 isoform 1 [Homo sapiens]	0.00986811	10.0926	322032	47059046	7 (2 1 3 1 0)
hCG2040637 [Homo sapiens]	0.00989096	10.0532	5436.24	119590114	1 (1 0 0 0 0)
ORF 22 [Human herpesvirus 8 type M]	0.00989435	10.0523	81242.9	18845988	1 (1 0 0 0 0)
immunoglobulin kappa chain variable region [Homo sapiens]	0.00990549	10.0744	9666.9	16075548	1 (1 0 0 0 0)
insulin-like growth factor 1 receptor precursor [Homo sapiens]	0.00991552	22.0829	154693	4557665	5 (0 2 0 0 3)
PRED65 [Homo sapiens]	0.00991791	10.0596	46018.5	7717243	1 (1 0 0 0 0)
UL83 [Human herpesvirus 5 strain Merlin]	0.00992395	20.069	62872.6	52139256	2 (2 0 0 0 0)
hypothetical protein LOC91646 [Homo sapiens]	0.00995245	28.0506	132493	128485546	5 (0 2 1 1 1)
envelope glycoprotein [Human immunodeficiency virus 1]	0.00997126	10.0677	15010.6	50981521	1 (1 0 0 0 0)
glioma pathogenesis-related protein precursor [Homo sapiens]	0.00998584	8.05095	30346.1	110825980	1 (0 1 0 0 0)
Tat [Human immunodeficiency virus 1]	114431139	3 (0 1 0 0 2)
GUC1C_HUMAN Guanylyl cyclase-activating protein 3 (GCAP 3) (Guanylate cyclase	6226818	2 (1 0 1 0 0)
zinc finger protein 445 [Homo sapiens]	31340735	5 (1 1 1 1 1)
envelope glycoprotein, c2v3 region [Human immunodeficiency virus type 1] [	478966	1 (1 0 0 0 0)
hCG2023911 [Homo sapiens]	119608334	1 (1 0 0 0 0)
D Chain D, Crystal Structure Of Staphylococcal Enterotoxin I (Sei) In Complex	112490707	2 (1 0 0 1 0)
transmembrane protein 30B [Homo sapiens]	63003930	2 (1 0 1 0 0)
hCG1652025 [Homo sapiens]	119611627	39 (24 7 4 4 0)
A42177 KRAB-domain-containing zinc finger protein ZNF45 - human (fragment)	284284	9 (2 5 1 1 0)
RPKL1_HUMAN Ribosomal protein S6 kinase-like 1	74762793	3 (0 0 2 1 0)
ubiquitin-like domain containing CTD phosphatase 1 [Homo sapiens]	21450802	2 (1 0 0 0 1)
gp120 protein [Human immunodeficiency virus 1] [MA	27848311	1 (0 1 0 0 0)
AF477054_1 envelope glycoprotein [Human immunodeficiency virus type 1] [M	21069247	7 (1 3 0 0 3)
immunoglobulin heavy chain variable region [Homo sapiens]	118406185	1 (1 0 0 0 0)
GNAS complex locus isoform f [Homo sapiens]	117938762	2 (1 0 0 0 1)
K1 glycoprotein [Human herpesvirus 8]	83755270	2 (0 1 0 0 1)
nesprin-2 [Homo sapiens]	24417711	11 (0 4 3 2 2)
envelope glycoprotein [Human immunodeficiency virus type 1]	17046569	9 (1 2 2 2 2)
unnamed protein product [Homo sapiens]	21756897	1 (1 0 0 0 0)
killer cell immunoglobulin-like receptor, three domains, long cytopla	134268642	1 (0 1 0 0 0)
unnamed protein product [Homo sapiens]	21756817	2 (1 0 0 1 0)
truncated env protein [Human immunodeficiency virus type 1]	6643031	3 (0 1 0 2 0)
Tubulin, beta [Homo sapiens]	18088719	6 (4 2 0 0 0)
HELZ_HUMAN Probable helicase with zinc-finger domain [MAS	1177024	8 (0 4 4 0 0)
unnamed protein product [Homo sapiens]	28193116	1 (1 0 0 0 0)
estrogen-responsive B box protein [Homo sapiens] [MA	3916727	1 (1 0 0 0 0)
major histocompatibility complex, class I, C precursor [Homo sapiens]	52630342	1 (1 0 0 0 0)
gag protein [Human immunodeficiency virus 1]	118139413	2 (1 1 0 0 0)
protease [Human immunodeficiency virus 1]	4375888	2 (1 0 1 0 0)
gag protein [Human immunodeficiency virus 1]	124389792	2 (0 2 0 0 0)
A Chain A, The Yeast Actin Val 159 Asn Mutant Complex With Human Gelsolin Segme	7546413	5 (0 2 0 3 0)
APG7 autophagy 7-like [Homo sapiens]	5453668	3 (0 1 1 0 1)
unnamed protein product [Homo sapiens]	21755889	3 (2 1 0 0 0)
ACACA protein [Homo sapiens]	32425437	1 (0 1 0 0 0)
G protein-coupled receptor 162 isoform 2 [Homo sapiens]	9951913	2 (0 1 0 1 0)
unnamed protein product [Homo sapiens]	7022746	2 (0 1 1 0 0)
IVa2 [Human adenovirus F]	9626558	7 (1 2 1 0 3)
KIAA1566 protein [Homo sapiens]	10047197	2 (0 0 1 1 0)
envelope glycoprotein [Human immunodeficiency virus 1]	31873058	10 (2 4 2 1 1)
unnamed protein product [Homo sapiens]	21758964	3 (0 0 3 0 0)
FLJ00152 protein [Homo sapiens]	18676510	4 (1 0 2 0 1)
hypothetical protein LOC54987 [Homo sapiens]	8923541	2 (0 1 1 0 0)
carbohydrate (N-acetylglucosamine 6-O) sulfotransferase 4 [Homo sapiens	5031735	1 (1 0 0 0 0)
envelope glycoprotein [Human immunodeficiency virus 1]	27801855	5 (3 1 0 1 0)
AF397424_1 C7ORF12 [Homo sapiens]	15987887	3 (1 0 1 0 1)
fas ligand [Homo sapiens]	4557329	2 (0 1 1 0 0)
KIAA0250 [Homo sapiens]	20521860	1 (1 0 0 0 0)
exterior membrane protein gp120 [Human immunodeficiency virus 1]	7258468	1 (0 1 0 0 0)
NAD+-specific isocitrate dehydrogenase beta precursor [Homo sapiens] [MAS	2737886	2 (0 0 0 1 1)
AF383245_1 envelope glycoprotein [Human immunodeficiency virus type 1] [M	19773771	2 (1 1 0 0 0)
unnamed protein product [Homo sapiens]	22761255	2 (1 0 1 0 0)
phosphoribosylaminoimidazole carboxylase, phosphoribosylaminoimidazole	5453539	1 (1 0 0 0 0)
envelope glycoprotein [Human immunodeficiency virus type 1]	2641541	1 (1 0 0 0 0)
phenylalanyl-tRNA synthetase, alpha subunit [Homo sapiens]	4758340	2 (0 0 1 0 1)
KIAA1760 protein [Homo sapiens]	29421208	1 (0 1 0 0 0)
AF204653_1 envelope glycoprotein [Human immunodeficiency virus type 1] [MA	6540554	1 (1 0 0 0 0)
pol protein [Human immunodeficiency virus 1]	23306628	1 (0 1 0 0 0)
unnamed protein product [Homo sapiens]	10437296	2 (1 0 1 0 0)
F-box protein 47 [Homo sapiens]
gp105 [Human immunodeficiency virus 2]
immunoglobulin heavy chain [Homo sapiens]
unnamed protein product [Homo sapiens]
AF474991_1 G protein-coupled receptor SNSR5 [Homo sapiens]
polo-like kinase [Homo sapiens]
mitochondrial ribosomal protein S15 [Homo sapiens]
polyprotein [Human calicivirus strain Mc37]
glutamate decarboxylase-like 1 [Homo sapiens]
sphingosine kinase 2 [Homo sapiens]
envelope glycoprotein [Human immunodeficiency virus 1]
Polyadenylate binding protein, human types 1, 2, 3, 4 [Medicago truncatu
G protein-coupled receptor kinase 4, isoform CRA_d [Homo sapiens]
PDZ domain containing RING finger 3 [Homo sapiens]
envelope glycoprotein gp120 [Human immunodeficiency virus 1]
mitochondrial ribosomal protein S6 [Homo sapiens]
pol protein [Human immunodeficiency virus 1]
vif [Human immunodeficiency virus 1]
envelope glycoprotein [Human immunodeficiency virus type 1]
hCG41809 [Homo sapiens]
